# Supplementary material
Source: PubMed Central journal article supplement (PMC8323504)
Supplement: mmc1.pdf [file mmc1.pdf]

We gratefully acknowledge the following Authors from the Originating laboratories responsible for obtaining the specimens, as well as the Submitting laboratories where the genome data were generated and shared via GISAID, on which this research is based.

All Submitters of data may be contacted directly via [www.gisaid.org](http://www.gisaid.org)

| Accession ID                                                                   | Originating Laboratory                                                                                                                       | Submitting Laboratory                                                                                                                                                                                                                             | Authors                                                                                                                                                                                                                                                                                                                                                                     |
|--------------------------------------------------------------------------------|----------------------------------------------------------------------------------------------------------------------------------------------|---------------------------------------------------------------------------------------------------------------------------------------------------------------------------------------------------------------------------------------------------|-----------------------------------------------------------------------------------------------------------------------------------------------------------------------------------------------------------------------------------------------------------------------------------------------------------------------------------------------------------------------------|
| EPI_ISL_402124, EPI_ISL_402127, EPI_ISL_402128, EPI_ISL_402129, EPI_ISL_402130 | Wuhan Jinyintan Hospital                                                                                                                     | Wuhan Institute of Virology, Chinese Academy of Sciences                                                                                                                                                                                          | Peng Zhou, Xing-Lou Yang, Ding-Yu Zhang, Lei Zhang, Yan Zhu, Hao-Rui Si, Zhengli Shi                                                                                                                                                                                                                                                                                        |
| EPI_ISL_402132                                                                 | Wuhan Jinyintan Hospital                                                                                                                     | Hubei Provincial Center for Disease Control and Prevention                                                                                                                                                                                        | Bin Fang, Xiang Li, Xiao Yu, Linlin Liu, Bo Yang, Faxian Zhan, Guojun Ye, Xixiang Huo, Junqiang Xu, Bo Yu, Kun Cai, Jing Li, Yongzhong Jiang.                                                                                                                                                                                                                               |
| EPI_ISL_403962, EPI_ISL_403963                                                 | Bamrasnaradura Hospital                                                                                                                      | 1. Department of Medical Sciences, Ministry of Public Health, Thailand 2. Thai Red Cross Emerging Infectious Diseases - Health Science Centre 3. Department of Disease Control, Ministry of Public Health, Thailand                               | Pilailuk,Okada; Siriraporn,Phuyung; Thanutsapa,Thnadachakul; Supaporn,Wacharapulesadee; Sittiporn,Parmmen; Warawan,Wongboot; Sunthareeya,Waicharoen; Rome,Buathong; Malinee,Chittaganpitch; Nanthawan,Mekha                                                                                                                                                                 |
| EPI_ISL_404227                                                                 | Zhejiang Provincial Center for Disease Control and Prevention                                                                                | Department of Microbiology, Zhejiang Provincial Center for Disease Control and Prevention                                                                                                                                                         | Yin Chen, Yanjun Zhang, Haiyan Mao, Junhang Pan, Xiuyu Lou, Yiyu Lu, Juying Yan, Hanping Zhu, Jian Gao, Yan Feng, Yi Sun, Hao Yan, Zhen Li, Yisheng Sun, Liming Gong, Qiong Ge, Wen Shi, Xinying Wang, Wenwu Yao, Zhangnv Yang, Fang Xu, Chen Chen, Enfu Chen, Zhen Wang, Zhiping Chen, Jianmin Jiang, Chonggao Hu                                                          |
| EPI_ISL_404228                                                                 | Zhejiang Provincial Center for Disease Control and Prevention                                                                                | Department of Microbiology, Zhejiang Provincial Center for Disease Control and Prevention                                                                                                                                                         | Yanjun Zhang, Yin Chen, Haiyan Mao, Junhang Pan, Xiuyu Lou, Yiyu Lu, Juying Yan, Hanping Zhu, Jian Gao, Yan Feng, Yi Sun, Hao Yan, Zhen Li, Yisheng Sun, Liming Gong, Qiong Ge, Wen Shi, Xinying Wang, Wenwu Yao, Zhangnv Yang, Fang Xu, Chen Chen, Enfu Chen, Zhen Wang, Zhiping Chen, Jianmin Jiang, Chonggao Hu                                                          |
| EPI_ISL_406592                                                                 | Shenzhen Third People's Hospital                                                                                                             | Shenzhen Key Laboratory of Pathogen and Immunity, National Clinical Research Center for Infectious Disease, Shenzhen Third People's Hospital                                                                                                      | Yang Yang, Chenguang Shen, Li Xing, Zhixiang Xu, Haixia Zheng, Yingxia Liu                                                                                                                                                                                                                                                                                                  |
| EPI_ISL_406593                                                                 | Shenzhen Key Laboratory of Pathogen and Immunity, National Clinical Research Center for Infectious Disease, Shenzhen Third People's Hospital | Shenzhen Key Laboratory of Pathogen and Immunity, National Clinical Research Center for Infectious Disease, Shenzhen Third People's Hospital                                                                                                      | Yang Yang, Chenguang Shen, Li Xing, Zhixiang Xu, Haixia Zheng, Yingxia Liu                                                                                                                                                                                                                                                                                                  |
| EPI_ISL_406862                                                                 | Charité Universitätsmedizin Berlin, Institute of Virology; Institut für Mikrobiologie der Bundeswehr, Munich                                 | Charité Universitätsmedizin Berlin, Institute of Virology                                                                                                                                                                                         | Victor M Corman, Julia Schneider, Talitha Veith, Barbara Mühlemann, Markus Antwerpen, Christian Drosten, Roman Wölfel                                                                                                                                                                                                                                                       |
| EPI_ISL_406970                                                                 | Hangzhou Center for Disease and Control Microbiology Lab                                                                                     | Hangzhou Center for Disease and Control Microbiology Lab                                                                                                                                                                                          | Yu Hua, Wang Haoqiu, Li Jun, Yu Xinfeng                                                                                                                                                                                                                                                                                                                                     |
| EPI_ISL_407079                                                                 | Lapland Central Hospital                                                                                                                     | Department of Virology, University of Helsinki and Helsinki University Hospital, Helsinki, Finland                                                                                                                                                | Teemu Smura, Suvu Kuivainen, Hannimari Kallio-Kokko, Olli Vapalahti                                                                                                                                                                                                                                                                                                         |
| EPI_ISL_407313                                                                 | Hangzhou Center for Disease Control and Prevention                                                                                           | Hangzhou Center for Disease Control and Prevention                                                                                                                                                                                                | Jun Li, Haoqiu Wang, Hua Yu, Qingfeng Mao, Xinfen Yu, Zhou Sun, Qingxin Kong, Xin Qian, Shuchang Chen, Xuchu Wang                                                                                                                                                                                                                                                           |
| EPI_ISL_407893                                                                 | Centre for Infectious Diseases and Microbiology Laboratory Services                                                                          | NSW Health Pathology - Institute of Clinical Pathology and Medical Research; Westmead Hospital; University of Sydney                                                                                                                              | Eden J-S, Carter I, Rahman H, Holmes EC, Rockett R, O'Sullivan MV, Sintchenko V, Chen SC, Maddocks S, Kok J and Dwyer DE for the 2019-nCoV Study Group                                                                                                                                                                                                                      |
| EPI_ISL_407976                                                                 | KU Leuven, Clinical and Epidemiological Virology                                                                                             | KU Leuven, Clinical and Epidemiological Virology                                                                                                                                                                                                  | Bert Vanmechelen, Elke Wollants, Annabel Rector, Els Keyaerts, Lies Laenen, Marc Van Ranst, and Piet Maes                                                                                                                                                                                                                                                                   |
| EPI_ISL_408430                                                                 | Department of Infectious and Tropical Diseases, Bichat Claude Bernard Hospital, Paris                                                        | National Reference Center for Viruses of Respiratory Infections, Institut Pasteur, Paris                                                                                                                                                          | Mélanie Albert, Marion Barbet, Sylvie Behillil, Méline Bizard, Angela Brisebarre, Flora Donati, Vincent Enouf, Maud Vanpeene, Sylvie van der Werf, Yazdan Yazdanpanah, Xavier Lescure                                                                                                                                                                                       |
| EPI_ISL_408431                                                                 | Sorbonne Université, Inserm et Assistance Publique-Hôpitaux de Paris (Pitié Salpêtrière)                                                     | National Reference Center for Viruses of Respiratory Infections, Institut Pasteur, Paris                                                                                                                                                          | Mélanie Albert, Marion Barbet, Sylvie Behillil, Méline Bizard, Angela Brisebarre, Flora Donati, Vincent Enouf, Maud Vanpeene, Sylvie van der Werf, Sonia Burrel, Anne-Geneviève Marcelin, Vincent Calvez, David Boutolleau, Elise Klément, Valérie Pouchere, Eric Caumes.                                                                                                   |
| EPI_ISL_408480                                                                 | National Institute for Viral Disease Control and Prevention, China CDC                                                                       | National Institute for Viral Disease Control & Prevention, CCDC                                                                                                                                                                                   | Wenjie TanXiaoqing FuXiang ZhaoWenling Wang Peihua NiuRoujian Lu,Yanhong SunBaoying HuangLi ZhaoFei YeWenbo XuGeorge F. GaoGuizhen Wu                                                                                                                                                                                                                                       |
| EPI_ISL_408481                                                                 | National Institute for Viral Disease Control and Prevention, China CDC                                                                       | National Institute for Viral Disease Control & Prevention, CCDC                                                                                                                                                                                   | Wenjie Tan, Hengqin Wang, Xiang Zhao, Wenling Wang, Peihua Niu, Roujian Lu, Sheng Ye, Baoying Huang, Li Zhao, Fei Ye, Wenbo Xu, George F. Gao, Guizhen Wu                                                                                                                                                                                                                   |
| EPI_ISL_408482                                                                 | National Institute for Viral Disease Control and Prevention, China CDC                                                                       | National Institute for Viral Disease Control & Prevention, CCDC                                                                                                                                                                                   | Wenjie Tan, Zhaoguo Wang, Xiang Zhao, Wenling Wang, Peihua Niu, Roujian Lu, Ti Liu, Baoying Huang, Li Zhao, Fei Ye, Wenbo Xu, George F. Gao, Guizhen Wu                                                                                                                                                                                                                     |
| EPI_ISL_408484                                                                 | National Institute for Viral Disease Control and Prevention, China CDC                                                                       | National Institute for Viral Disease Control & Prevention, CCDC                                                                                                                                                                                   | Wenjie Tan, Jianan Xu, Wenling Wang, Peihua Niu, Roujian Lu, Huiping Yang, Xiang Zhao, Baoying Huang, Li Zhao, Fei Ye, Wenbo Xu, George F. Gao, Guizhen Wu                                                                                                                                                                                                                  |
| EPI_ISL_408485                                                                 | National Institute for Viral Disease Control and Prevention, China CDC                                                                       | National Institute for Viral Disease Control & Prevention, CCDC                                                                                                                                                                                   | Wenjie Tan, Quanyi Wang, Wenling Wang, Peihua Niu, Roujian Lu, Yang Pan, Xiang Zhao, Baoying Huang, Li Zhao, Fei Ye, Wenbo Xu, George F. Gao, Guizhen Wu                                                                                                                                                                                                                    |
| EPI_ISL_408486                                                                 | National Institute for Viral Disease Control and Prevention, China CDC                                                                       | National Institute for Viral Disease Control & Prevention, CCDC                                                                                                                                                                                   | Wenjie Tan, Yong Shi, Wenling Wang, Peihua Niu, Roujian Lu, Jianxiang Li, Xiang Zhao, Baoying Huang, Li Zhao, Fei Ye, Wenbo Xu, George F. Gao, Guizhen Wu                                                                                                                                                                                                                   |
| EPI_ISL_408488                                                                 | National Institute for Viral Disease Control and Prevention, China CDC                                                                       | National Institute for Viral Disease Control & Prevention, CCDC                                                                                                                                                                                   | Wenjie Tan, Shenjiao Wang, Wenling Wang, Peihua Niu, Roujian Lu, Kangchen Zhao, Xiang Zhao, Baoying Huang, Li Zhao, Fei Ye, Wenbo Xu, George F. Gao, Guizhen Wu                                                                                                                                                                                                             |
| EPI_ISL_408489                                                                 | Department of Laboratory Medicine, National Taiwan University Hospital                                                                       | Microbial Genomics Core Lab, National Taiwan University Centers of Genomic and Precision Medicine                                                                                                                                                 | Shiou-Hwei Yeh, You-Yu Lin, Ya-Yun Lai, Chiao-Ling Li, Shan-Chwen Chang, Pei-Jer Chen, Sui-Yuan Chang                                                                                                                                                                                                                                                                       |
| EPI_ISL_408666, EPI_ISL_408669                                                 | Dept. of Virology III, National Institute of Infectious Diseases                                                                             | Pathogen Genomics Center, National Institute of Infectious Diseases                                                                                                                                                                               | Tsuyoshi Sekizuka, Shutoku Matsuyama, Naganori Nao, Kazuya Shirato, Makoto Takeda, Makoto Kuroda                                                                                                                                                                                                                                                                            |
| EPI_ISL_408977                                                                 | Serology, Virology and OTDS Laboratories (SAVID), NSW Health Pathology Randwick                                                              | NSW Health Pathology - Institute of Clinical Pathology and Medical Research; Centre for Infectious Diseases and Microbiology Laboratory Services; Westmead Hospital; University of Sydney                                                         | Eden J-S, Carter I, Rahman H, Rawlinson W, Holmes EC, Rockett R, O'Sullivan MV, Sintchenko V, Chen SC, Maddocks S, Kok J and Dwyer DE for the 2019-nCoV Study Group*                                                                                                                                                                                                        |
| EPI_ISL_410218                                                                 | Department of Laboratory Medicine, National Taiwan University Hospital                                                                       | Microbial Genomics Core Lab, National Taiwan University Centers of Genomic and Precision Medicine                                                                                                                                                 | Shiou-Hwei Yeh, You-Yu Lin, Ya-Yun Lai, Chiao-Ling Li, Shan-Chwen Chang, Pei-Jer Chen, Sui-Yuan Chang                                                                                                                                                                                                                                                                       |
| EPI_ISL_410301                                                                 | National Influenza Centre, National Public Health Laboratory, Kathmandu, Nepal                                                               | The University of Hong Kong                                                                                                                                                                                                                       | Ranjit Sah , Runa Jha, Daniel Chu, Haogao Gu, Malik Peiris, Anup Bastola, Alfonso J. Rodriguez-Morales, Bibek Kumar Lal, Basu Dev Pandey, Leo Poon                                                                                                                                                                                                                          |
| EPI_ISL_410531, EPI_ISL_410532                                                 | Dept. of Pathology, National Institute of Infectious Diseases                                                                                | Pathogen Genomics Center, National Institute of Infectious Diseases                                                                                                                                                                               | Tsuyoshi Sekizuka, Harutaka Katano, Shutoku Matsuyama, Naganori Nao, Kazuya Shirato, Motoi Suzuki, Hideki Hasegawa, Takaji Wakita, Makoto Takeda, Tadaki Suzuki, Makoto Kuroda                                                                                                                                                                                              |
| EPI_ISL_410545                                                                 | INMI Lazzaro Spallanzani IRCCS                                                                                                               | Laboratory of Virology, INMI Lazzaro Spallanzani IRCCS                                                                                                                                                                                            | Maria R. Capobianchi, Cesare E. M. Gruber, Martina Rueca, Barbara Bartolini, Francesco Messina, Emanuela Giombini, Francesca Colavita, Concetta Castilletti, Eleonora Lalle, Fabrizio Carletti, Emanuele Nicastri, Giuseppe Ippolito.                                                                                                                                       |
| EPI_ISL_410546                                                                 | INMI Lazzaro Spallanzani IRCCS                                                                                                               | Laboratory of Virology, INMI Lazzaro Spallanzani IRCCS                                                                                                                                                                                            | Maria R. Capobianchi, Cesare E. M. Gruber, Martina Rueca, Barbara Bartolini, Francesco Messina, Emanuela Giombini, Francesca Colavita, Concetta Castilletti, Eleonora Lalle, Emanuele Nicastri, Giuseppe Ippolito.                                                                                                                                                          |
| EPI_ISL_410984                                                                 | Department of Infectious and Tropical Diseases, Bichat Claude Bernard Hospital, Paris                                                        | National Reference Center for Viruses of Respiratory Infections, Institut Pasteur, Paris                                                                                                                                                          | Mélanie Albert, Marion Barbet, Sylvie Behillil, Méline Bizard, Angela Brisebarre, Flora Donati, Vincent Enouf, Maud Vanpeene, Sylvie van der Werf, Yazdan Yazdanpanah, Xavier Lescure                                                                                                                                                                                       |
| EPI_ISL_411218                                                                 | Department of Infectious and Tropical Diseases, Bichat Claude Bernard Hospital, Paris                                                        | Laboratoire Virpath, CIRI U111, UCBL1, INSERM, CNRS, ENS Lyon                                                                                                                                                                                     | Olivier Terrier, Aurélien Traversier, Julien Fourret, Yazdan Yazdanpanah, Xavier Lescure, Catherine Legras-Lachuer, Alexandre Gaymard, Bruno Lina, Manuel Rosa-Calatrava                                                                                                                                                                                                    |
| EPI_ISL_411219, EPI_ISL_411220                                                 | Department of Infectious and Tropical Diseases, Bichat Claude Bernard Hospital, Paris                                                        | Laboratoire Virpath, CIRI U111, UCBL1, INSERM, CNRS, ENS Lyon                                                                                                                                                                                     | Olivier Terrier, Aurélien Traversier, Julien Fourret, Yazdan Yazdanpanah, Xavier Lescure, Alexandre Gaymard, Bruno Lina, Manuel Rosa-Calatrava                                                                                                                                                                                                                              |
| EPI_ISL_411902                                                                 | Virology Unit, Institut Pasteur du Cambodge.                                                                                                 | Virology Unit, Institut Pasteur du Cambodge (Sequencing done by: Jessica E Manning)/Jennifer A Bohl at Malaria and Vector Research Laboratory, National Institute of Allergy and Infectious Diseases and Vida Ahyong from Chan-Zuckerberg Biohub) | Erik A Karlsson, Jennifer A Bohl, Vida Ahyong, Veasna Duong, Philippe Dussart, Jessica E Manning.                                                                                                                                                                                                                                                                           |
| EPI_ISL_412386                                                                 | Beijing Ditan Hospital, Capital Medical University                                                                                           | National Institute for Communicable Disease Control and Prevention, Chinese Center for Disease Control and Prevention                                                                                                                             | Xinmin Xu, Xin Lu, Pan Xiang, Haijian Zhou, Biao Kan, Yajie Wang, Jingyuan Liu, Yanwen Xiong, Huizhu Wang, Ruihong Li, Fangfang Jin, Jie Gong, Xiaoping Chen, Lili Gao, Haofeng Xiong, Lin Pu, Chuansheng Li, Ming Zhang, Jianbo Tan, Yao Sun, Yufeng Liu, Hebing Guo, Jingjing Hao                                                                                         |
| EPI_ISL_412459                                                                 | Jingzhou Center for Disease Control and Prevention                                                                                           | Hubei Provincial Center for Disease Control and Prevention                                                                                                                                                                                        | Bin Fang, Xiang Li, Xiao Yu, Linlin Liu, Bo Yang, Faxian Zhan, Guojun Ye, Xixiang Huo, Junqiang Xu, Bo Yu, Kun Cai, Jing Li, Maoyi Chen, Jie Hu, Chunlin Mao, Yongzhong Jiang.                                                                                                                                                                                              |
| EPI_ISL_412964                                                                 | Hospital Israelita Albert Einstein                                                                                                           | Instituto Adolfo Lutz Interdisciplinary Procedures Center Strategic Laboratory                                                                                                                                                                    | Jaqueline Goes de Jesus, Claudio Tavares Sacchi, Daniela Bernardes Borges da Silva, Ingra Morales Claro, Flávia Cristina da Silva Sales, Claudia Regina Gonçalves, Joshua Quick, Maria do Carmo, Sampaio Tavares Timenetsky, Nicholas James Loman, Andrew Rambaut, Ester Cerdeira Sabino, Nuno Rodrigues Faria                                                              |
| EPI_ISL_412970                                                                 | Washington State Department of Health                                                                                                        | Seattle Flu Study                                                                                                                                                                                                                                 | Helen Chu, Michael Boeckh, Janet Englund, Michael Famulare, Barry Lutz, Deborah Nickerson, Mark Rieder, Lea Starita, Matthew Thompson, Jay Shendure, and Trevor Bedford                                                                                                                                                                                                     |
| EPI_ISL_412972                                                                 | Instituto Nacional de Enfermedades Respiratorias                                                                                             | Instituto de Diagnóstico y Referencia Epidemiológicos (INDRE)                                                                                                                                                                                     | Ramirez-Gonzalez Ernesto, Garces-Ayala Fabiola, Araiza-Rodriguez Adnan, Mendieta-Condado Edgar, Rodriguez-Maldonado Abril, Wong-Aramblia Claudia, Vazquez-Perez Joel, Martinez Arturo, Boukaddida Celia, Munoz-Mancha Esteban, Sanchez Alejandro, Isa Pavel, Taboada Blanca, Lopez Susana, Arias Carlos, Barrera-Badillo Gisela, Hernandez-Rivas Lucia, Lopez-Martinez Irma |
| EPI_ISL_412975                                                                 | Centre for Infectious Diseases and Microbiology Laboratory Services                                                                          | NSW Health Pathology - Institute of Clinical Pathology and Medical Research; Westmead Hospital; University of Sydney                                                                                                                              | Eden J-S, Carter I, Rahman H, Holmes EC, Rockett R, O'Sullivan MV, Sintchenko V, Chen SC, Maddocks S, Kok J and Dwyer DE for the 2019-nCoV Study Group                                                                                                                                                                                                                      |
| EPI_ISL_412978                                                                 | The Central Hospital Of Wuhan                                                                                                                | Hubei Provincial Center for Disease Control and Prevention                                                                                                                                                                                        | Bin Fang, Xiang Li, Xiao Yu, Linlin Liu, Bo Yang, Faxian Zhan, Guojun Ye, Xixiang Huo, Junqiang Xu, Bo Yu, Kun Cai, Jing Li, Yongzhong Jiang.                                                                                                                                                                                                                               |

|                                                                                |                                                                                                                                                                                                                  |                                                                                                                         |                                                                                                                                                                                                                                                                                                                                                                                                                                                                                                                                                            |
|--------------------------------------------------------------------------------|------------------------------------------------------------------------------------------------------------------------------------------------------------------------------------------------------------------|-------------------------------------------------------------------------------------------------------------------------|------------------------------------------------------------------------------------------------------------------------------------------------------------------------------------------------------------------------------------------------------------------------------------------------------------------------------------------------------------------------------------------------------------------------------------------------------------------------------------------------------------------------------------------------------------|
| EPI_ISL_412979, EPI_ISL_412980                                                 | Union Hospital of Tongji Medical College, Huazhong University of Science and Technology                                                                                                                          | Hubei Provincial Center for Disease Control and Prevention                                                              | Bin Fang, Xiang Li, Xiao Yu, Linlin Liu, Bo Yang, Faxian Zhan, Guojun Ye, Xixiang Huo, Junqiang Xu, Bo Yu, Kun Cai, Jing Li, Yongzhong Jiang.                                                                                                                                                                                                                                                                                                                                                                                                              |
| EPI_ISL_412981                                                                 | CR&WISCO GENERAL HOSPITAL                                                                                                                                                                                        | Hubei Provincial Center for Disease Control and Prevention                                                              | Bin Fang, Xiang Li, Xiao Yu, Linlin Liu, Bo Yang, Faxian Zhan, Guojun Ye, Xixiang Huo, Junqiang Xu, Bo Yu, Kun Cai, Jing Li, Yongzhong Jiang.                                                                                                                                                                                                                                                                                                                                                                                                              |
| EPI_ISL_412982                                                                 | Wuhan Lung Hospital                                                                                                                                                                                              | Hubei Provincial Center for Disease Control and Prevention                                                              | Bin Fang, Xiang Li, Xiao Yu, Linlin Liu, Bo Yang, Faxian Zhan, Guojun Ye, Xixiang Huo, Junqiang Xu, Bo Yu, Kun Cai, Jing Li, Yongzhong Jiang.                                                                                                                                                                                                                                                                                                                                                                                                              |
| EPI_ISL_412983                                                                 | Tianmen Center for Disease Control and Prevention                                                                                                                                                                | Hubei Provincial Center for Disease Control and Prevention                                                              | Bin Fang, Xiang Li, Xiao Yu, Linlin Liu, Bo Yang, Faxian Zhan, Guojun Ye, Xixiang Huo, Junqiang Xu, Bo Yu, Kun Cai, Jing Li, YiFa Zhu, Yangyang Tao, Xierong Li, Yongzhong Jiang.                                                                                                                                                                                                                                                                                                                                                                          |
| EPI_ISL_413016                                                                 | Hospital Israelita Albert Einstein                                                                                                                                                                               | Instituto Adolfo Lutz, Interdisciplinary Procedures Center, Strategic Laboratory                                        | Jaqueline Goes de Jesus, Claudio Tavares Sacchi, Fabiana Cristina Pereira dos Santos, Ingra Morales Claro, Flávia Cristina da Silva Sales, Claudia Regina Gonçalves, Joshua Quick, Maria do Carmo Sampaio Tavares Timenetsky, Nicholas James Loman, Andrew Rambaut, Ester Cerdeira Sabino, Nuno Rodrigues Faria                                                                                                                                                                                                                                            |
| EPI_ISL_413213, EPI_ISL_413214                                                 | Centre for Infectious Diseases and Microbiology Laboratory Services                                                                                                                                              | NSW Health Pathology - Institute of Clinical Pathology and Medical Research; Westmead Hospital; University of Sydney    | Eden J-S, Carter I, Rahman H, Holmes EC, Rockett R, O'Sullivan MV, Sintchenko V, Chen SC, Maddocks S, Kok J and Dwyer DE for the 2019-nCoV Study Group*                                                                                                                                                                                                                                                                                                                                                                                                    |
| EPI_ISL_413459                                                                 | Department of Pathology, Toshima Hospital                                                                                                                                                                        | Pathogen Genomics Center, National Institute of Infectious Diseases                                                     | Tsuyoshi Sekizuka, Kentaro Itokawa, Takuya Adachi, Masahiro Sano, Jun Yamazaki, Ipppei Miyamoto, Haruka Nishioka, Ja-Mun Chong, Noriko Nakajima, Yuko Sato, Minoru Tobiume, Harutaka Katano, Tadaki Suzuki, Makoto Kuroda                                                                                                                                                                                                                                                                                                                                  |
| EPI_ISL_413490                                                                 | Auckland Hospital                                                                                                                                                                                                | Institute of Environmental Science and Research (ESR)                                                                   | Matt Storey, Xiaoyun Ren, Gary McAuliffe, Sally Roberts, Matthew Blakiston, Erasmus Smit, Lauren Jelly, Joep de Lig                                                                                                                                                                                                                                                                                                                                                                                                                                        |
| EPI_ISL_413522                                                                 | Indian Council of Medical Research - National Institute of Virology                                                                                                                                              | National Influenza Center, Indian Council of Medical Research - National Institute of Virology                          | Potdar V, Yadav PD, Choudhary ML, Shete-Aich A                                                                                                                                                                                                                                                                                                                                                                                                                                                                                                             |
| EPI_ISL_413523                                                                 | Indian Council of Medical Research-National Institute of Virology                                                                                                                                                | National Influenza Center, Indian Council of Medical Research-National Institute of Virology                            | Potdar V, Yadav PD, Choudhary ML, Shete-Aich A                                                                                                                                                                                                                                                                                                                                                                                                                                                                                                             |
| EPI_ISL_413594                                                                 | Centre for Infectious Diseases and Microbiology Laboratory Services                                                                                                                                              | NSW Health Pathology - Institute of Clinical Pathology and Medical Research; Westmead Hospital; University of Sydney    | Rockett R, Eden J-S, Lam C, Gray K, Timms, V, Gall, M, Alicia, A, Carter I, Rahman H, Holmes EC, O'Sullivan MV, Sintchenko V, Chen SC, Maddocks S, Kok J and Dwyer DE for the 2019-nCoV Study Group*                                                                                                                                                                                                                                                                                                                                                       |
| EPI_ISL_413595                                                                 | Centre for Infectious Diseases and Microbiology Laboratory Services                                                                                                                                              | NSW Health Pathology - Institute of Clinical Pathology and Medical Research; Westmead Hospital; University of Sydney    | Rockett R, Eden J-S, Lam C, Gray K, Timms, V, Gall, M, Carter I, Rahman H, Holmes EC, O'Sullivan MV, Sintchenko V, Chen SC, Maddocks S, Kok J and Dwyer DE for the 2019-nCoV Study Group*                                                                                                                                                                                                                                                                                                                                                                  |
| EPI_ISL_413596                                                                 | Centre for Infectious Diseases and Microbiology - Public Health                                                                                                                                                  | NSW Health Pathology - Institute of Clinical Pathology and Medical Research; Westmead Hospital; University of Sydney    | Rockett R, Eden J-S, Lam C, Gray K, Timms, V, Gall, M, Carter I, Rahman H, Holmes EC, O'Sullivan MV, Sintchenko V, Chen SC, Maddocks S, Kok J and Dwyer DE for the 2019-nCoV Study Group*                                                                                                                                                                                                                                                                                                                                                                  |
| EPI_ISL_413597                                                                 | Centre for Infectious Diseases and Microbiology - Public Health                                                                                                                                                  | NSW Health Pathology - Institute of Clinical Pathology and Medical Research; Westmead Hospital; University of Sydney    | Lam C, Eden J-S, Rockett R, Gray K, Timms, V, Gall, M, Carter I, Rahman H, Holmes EC, O'Sullivan MV, Sintchenko V, Chen SC, Maddocks S, Kok J and Dwyer DE for the 2019-nCoV Study Group*                                                                                                                                                                                                                                                                                                                                                                  |
| EPI_ISL_413598                                                                 | Centre for Infectious Diseases and Microbiology - Public Health                                                                                                                                                  | NSW Health Pathology - Institute of Clinical Pathology and Medical Research; Westmead Hospital; University of Sydney    | Gray K, Eden J-S, Lam C, Rockett R, Timms, V, Gall, M, Carter I, Rahman H, Holmes EC, O'Sullivan MV, Sintchenko V, Chen SC, Maddocks S, Kok J and Dwyer DE for the 2019-nCoV Study Group*                                                                                                                                                                                                                                                                                                                                                                  |
| EPI_ISL_413599                                                                 | Centre for Infectious Diseases and Microbiology - Public Health                                                                                                                                                  | NSW Health Pathology - Institute of Clinical Pathology and Medical Research; Westmead Hospital; University of Sydney    | Timms, V, Eden J-S, Lam C, Gray K, Rockett R, Gall, M, Carter I, Rahman H, Holmes EC, O'Sullivan MV, Sintchenko V, Chen SC, Maddocks S, Kok J and Dwyer DE for the 2019-nCoV Study Group*                                                                                                                                                                                                                                                                                                                                                                  |
| EPI_ISL_413600                                                                 | Centre for Infectious Diseases and Microbiology - Public Health                                                                                                                                                  | NSW Health Pathology - Institute of Clinical Pathology and Medical Research; Westmead Hospital; University of Sydney    | Gall, M, Eden J-S, Lam C, Gray K, Timms, V, Rockett R, Carter I, Rahman H, Holmes EC, O'Sullivan MV, Sintchenko V, Chen SC, Maddocks S, Kok J and Dwyer DE for the 2019-nCoV Study Group*                                                                                                                                                                                                                                                                                                                                                                  |
| EPI_ISL_413647                                                                 | Centro Hospital do Porto, E.P.E. - H. Geral de Santo Antonio                                                                                                                                                     | Instituto Nacional de Saude (INSA)                                                                                      | Raquel Guiomar, Inês Costa, Pedro Pechirra, Joana Mendonça, Luís Vieira, Helena Ramos, Joana Isidro, Vítor Borges, João Paulo Gomes                                                                                                                                                                                                                                                                                                                                                                                                                        |
| EPI_ISL_413648                                                                 | Centro Hospitalar e Universitário de Sao Joao, Porto                                                                                                                                                             | Instituto Nacional de Saude (INSA)                                                                                      | Raquel Guiomar, Inês Costa, Pedro Pechirra, Joana Mendonça, Luís Vieira, João Tiago Guimarães, Joana Isidro, Vítor Borges, João Paulo Gomes                                                                                                                                                                                                                                                                                                                                                                                                                |
| EPI_ISL_414014                                                                 | Hospital Israelita Albert Einstein                                                                                                                                                                               | Instituto Adolfo Lutz, Interdisciplinary Procedures Center, Strategic Laboratory                                        | Claudio Tavares Sacchi, Claudia Regina Gonçalves, Katia Correia dos Santos, Carlos Henrique Camargo, Maria do Carmo Sampaio Tavares Timenetsky, Terezinha Maria de Paiva, Ester Cerdeira Sabino                                                                                                                                                                                                                                                                                                                                                            |
| EPI_ISL_414015                                                                 | Hospital São Joaquim Beneficência Portuguesa                                                                                                                                                                     | Instituto Adolfo Lutz, Interdisciplinary Procedures Center, Strategic Laboratory                                        | Claudio Tavares Sacchi, Claudia Regina Gonçalves, Simone Guadagnucci Morillo, Carlos Henrique Camargo, Maria do Carmo Sampaio Tavares Timenetsky, Fabiana Cristina Pereira dos Santos Terezinha Maria de Paiva, Ester Cerdeira Sabino                                                                                                                                                                                                                                                                                                                      |
| EPI_ISL_414016                                                                 | Hospital São Joaquim Beneficência Portuguesa                                                                                                                                                                     | Instituto Adolfo Lutz, Interdisciplinary Procedures Center, Strategic Laboratory                                        | Claudio Tavares Sacchi, Claudia Regina Gonçalves, Audrey Cilli, Carlos Henrique Camargo, Maria do Carmo Sampaio Tavares Timenetsky, Daniela Bernardes Borges da Silva, Terezinha Maria de Paiva, Ester Cerdeira Sabino                                                                                                                                                                                                                                                                                                                                     |
| EPI_ISL_414017                                                                 | Hospital São Joaquim Beneficência Portuguesa                                                                                                                                                                     | Instituto Adolfo Lutz, Interdisciplinary Procedures Center, Strategic Laboratory                                        | Claudio Tavares Sacchi, Claudia Regina Gonçalves, Fabiana Cristina Pereira dos Santos, Carlos Henrique Camargo, Maria do Carmo Sampaio Tavares Timenetsky, Daniela Bernardes Borges da Silva, Terezinha Maria de Paiva, Ester Cerdeira Sabino                                                                                                                                                                                                                                                                                                              |
| EPI_ISL_414477                                                                 | The National Institute of Public Health Center for Epidemiology and Microbiology                                                                                                                                 | State Veterinary Institute Prague                                                                                       | Alexander Nagy, Oldřich Bartoš, Helena Jirincova, Klara Labska, Ludmila Novakova, Olga Storkanová, Dusan Trnka, Jaromira Vecerova                                                                                                                                                                                                                                                                                                                                                                                                                          |
| EPI_ISL_414495                                                                 | Servicio Microbiología, Hospital Clínico Universitario. Valencia.                                                                                                                                                | Sequencing and Bioinformatics Service. Molecular Epidemiology Laboratory. FISABIO-Public Health                         | David Navarro, Maria Alma Bracho, Giuseppe D'Auria, Griselda De Marco, Neris Garcia-Gonzalez, Fernando Gonzalez-Candelas                                                                                                                                                                                                                                                                                                                                                                                                                                   |
| EPI_ISL_414496                                                                 | Servicio Microbiología, Hospital Clínico Universitario. Valencia.                                                                                                                                                | Sequencing and Bioinformatics Service. Molecular Epidemiology Laboratory. FISABIO-Public Health                         | David Navarro, Maria Alma Bracho, Giuseppe D'Auria, Griselda De Marco, Neris Garcia-Gonzalez, Fernando Gonzalez-Candelas                                                                                                                                                                                                                                                                                                                                                                                                                                   |
| EPI_ISL_414520, EPI_ISL_414521                                                 | Bundeswehr Institute of Microbiology                                                                                                                                                                             | Bundeswehr Institute of Microbiology                                                                                    | Mathias C Walter, Markus H Antwerpen and Roman Wölfel                                                                                                                                                                                                                                                                                                                                                                                                                                                                                                      |
| EPI_ISL_414577                                                                 | Hospital de Talca, Chile                                                                                                                                                                                         | Instituto de Salud Publica de Chile                                                                                     | Andrés E. Castillo, Bárbara Parra, Paz Tapia, Alejandra Acevedo, Jaime Lagos, Winston Andrade, Loredana Arata, Gabriel Leal, Gisselle Barra, Carolina Tambley, Javier Tognarelli, Patricia Bustos, Soledad Ulloa, Rodrigo Fasce, Jorge Fernández                                                                                                                                                                                                                                                                                                           |
| EPI_ISL_414598                                                                 | Servicio Microbiología, Hospital Clínico Universitario, Valencia                                                                                                                                                 | Sequencing and Bioinformatics Service and Molecular Epidemiology Research Group. FISABIO-Public Health.                 | David Navarro, Maria Alma Bracho, Giuseppe D'Auria, Griselda De Marco, Neris Garcia-Gonzalez, Fernando Gonzalez-Candelas                                                                                                                                                                                                                                                                                                                                                                                                                                   |
| EPI_ISL_414623                                                                 | Laboratoire de Virologie Institut de Virologie - INSERM U 1109 Hôpitaux Universitaires de Strasbourg                                                                                                             | National Reference Center for Viruses of Respiratory Infections, Institut Pasteur, Paris                                | Mélinie Albert, Marion Barbet, Sylvie Behillil, Méline Bizard, Angela Brisebarre, Flora Donati Vincent Enouf, Maud Vanpeene, Sylvie van der Werf, Samira Fafi-Kremer                                                                                                                                                                                                                                                                                                                                                                                       |
| EPI_ISL_414624                                                                 | Centre Hospitalier Universitaire de Rouen Laboratoire de Virologie                                                                                                                                               | National Reference Center for Viruses of Respiratory Infections, Institut Pasteur, Paris                                | Mélinie Albert, Marion Barbet, Sylvie Behillil, Méline Bizard, Angela Brisebarre, Flora Donati Vincent Enouf, Maud Vanpeene, Sylvie van der Werf, Jean-Christophe Plantier                                                                                                                                                                                                                                                                                                                                                                                 |
| EPI_ISL_414625                                                                 | Centre Hospitalier Régional Universitaire de Nantes Laboratoire de Virologie                                                                                                                                     | National Reference Center for Viruses of Respiratory Infections, Institut Pasteur, Paris                                | Mélinie Albert, Marion Barbet, Sylvie Behillil, Méline Bizard, Angela Brisebarre, Flora Donati Vincent Enouf, Maud Vanpeene, Sylvie van der Werf, Marianne Coste-Burel                                                                                                                                                                                                                                                                                                                                                                                     |
| EPI_ISL_414626                                                                 | unknown                                                                                                                                                                                                          | National Reference Center for Viruses of Respiratory Infections, Institut Pasteur, Paris                                | Mélinie Albert, Marion Barbet, Sylvie Behillil, Méline Bizard, Angela Brisebarre, Flora Donati Vincent Enouf, Maud Vanpeene, Sylvie van der Werf                                                                                                                                                                                                                                                                                                                                                                                                           |
| EPI_ISL_414627, EPI_ISL_414628, EPI_ISL_414629, EPI_ISL_414630                 | Centre Hospitalier Compiegne Laboratoire de Biologie                                                                                                                                                             | National Reference Center for Viruses of Respiratory Infections, Institut Pasteur, Paris                                | Mélinie Albert, Marion Barbet, Sylvie Behillil, Méline Bizard, Angela Brisebarre, Flora Donati Vincent Enouf, Maud Vanpeene, Sylvie van der Werf, Raulin Olivia                                                                                                                                                                                                                                                                                                                                                                                            |
| EPI_ISL_414631, EPI_ISL_414632                                                 | Hôpital Robert Debré Laboratoire de Virologie                                                                                                                                                                    | National Reference Center for Viruses of Respiratory Infections, Institut Pasteur, Paris                                | Mélinie Albert, Marion Barbet, Sylvie Behillil, Méline Bizard, Angela Brisebarre, Flora Donati Vincent Enouf, Maud Vanpeene, Sylvie van der Werf, Laurent Andreoletti                                                                                                                                                                                                                                                                                                                                                                                      |
| EPI_ISL_414633                                                                 | Centre Hospitalier René Dubois Laboratoire de Microbiologie - Bât A                                                                                                                                              | National Reference Center for Viruses of Respiratory Infections, Institut Pasteur, Paris                                | Mélinie Albert, Marion Barbet, Sylvie Behillil, Méline Bizard, Angela Brisebarre, Flora Donati Vincent Enouf, Maud Vanpeene, Sylvie van der Werf, Pascale Martres                                                                                                                                                                                                                                                                                                                                                                                          |
| EPI_ISL_414634, EPI_ISL_414635, EPI_ISL_414636, EPI_ISL_414637, EPI_ISL_414638 | Centre Hospitalier Compiegne Laboratoire de Biologie                                                                                                                                                             | National Reference Center for Viruses of Respiratory Infections, Institut Pasteur, Paris                                | Mélinie Albert, Marion Barbet, Sylvie Behillil, Méline Bizard, Angela Brisebarre, Flora Donati Vincent Enouf, Maud Vanpeene, Sylvie van der Werf, Raulin Olivia                                                                                                                                                                                                                                                                                                                                                                                            |
| EPI_ISL_414663, EPI_ISL_414691                                                 | State Key Laboratory of Respiratory Disease, National Clinical Research Center for Respiratory Disease, Guangzhou Institute of Respiratory Health, the First Affiliated Hospital of Guangzhou Medical University | The First Affiliated Hospital of Guangzhou Medical University & BGI-Shenzhen                                            | Zhao et al                                                                                                                                                                                                                                                                                                                                                                                                                                                                                                                                                 |
| EPI_ISL_415153                                                                 | KU Leuven, Clinical and Epidemiological Virology                                                                                                                                                                 | KU Leuven, Clinical and Epidemiological Virology                                                                        | Bert Vanmechelen, Joan Marti-Carreras, Tony Wawina, Marc Van Ranst, Piet Maes                                                                                                                                                                                                                                                                                                                                                                                                                                                                              |
| EPI_ISL_415154                                                                 | KU Leuven, Clinical and Epidemiological Virology                                                                                                                                                                 | KU Leuven, Clinical and Epidemiological Virology                                                                        | Bert Vanmechelen, Joan Marti-Carreras, Tony Wawina, Marc Van Ranst, Piet Maes.                                                                                                                                                                                                                                                                                                                                                                                                                                                                             |
| EPI_ISL_415155                                                                 | KU Leuven, Clinical and Epidemiological Virology                                                                                                                                                                 | KU Leuven, Clinical and Epidemiological Virology                                                                        | Bert Vanmechelen, Joan Marti-Carreras, Tony Wawina, Marc Van Ranst, Piet Maes                                                                                                                                                                                                                                                                                                                                                                                                                                                                              |
| EPI_ISL_415156, EPI_ISL_415157, EPI_ISL_415158, EPI_ISL_415159                 | KU Leuven, Clinical and Epidemiological Virology                                                                                                                                                                 | KU Leuven, Clinical and Epidemiological Virology                                                                        | Bert Vanmechelen, Joan Marti-Carreras, Tony Wawina, Piet Maes                                                                                                                                                                                                                                                                                                                                                                                                                                                                                              |
| EPI_ISL_415641, EPI_ISL_415642, EPI_ISL_415643, EPI_ISL_415644                 | R. G. Lugar Center for Public Health Research, National Center for Disease Control and Public Health (NCDC) of Georgia.                                                                                          | R. G. Lugar Center for Public Health Research, National Center for Disease Control and Public Health (NCDC) of Georgia. | Nato Kotaria, Marine Murtskhalvadze, Ann Machabishvili, Lela Sabadze, Mari Gavashelidze, Ana Pankiuri, Meri Pantsulaia, Gvantsa Brachveli, Tata Imnadze, Tamar Jashishvili, Tea Tevdoradze, Ketevan Sidamondize, Ekaterine Khmaladze, Ekaterine Zhghenti, Roena Sukhishvili, Mariam Zakalashvili, Lela Urushadze, Magda Dgebuadze, Giorgi Tomashvili, Davit Tsguria, Ekaterine Zangaladze, Nino Berishvili, Gvantsa Chanturia, Adam Kotorashvili, Maia Alkhaladze, Irma Burjanadze, Anna Kasradze, Khatuna Zakhashvili, Paata Imnadze, Amiran Gamkrelidze. |
| EPI_ISL_415649                                                                 | unknown                                                                                                                                                                                                          | National Reference Center for Viruses of Respiratory Infections, Institut Pasteur, Paris                                | Mélinie Albert, Marion Barbet, Sylvie Behillil, Méline Bizard, Angela Brisebarre, Flora Donati Vincent Enouf, Maud Vanpeene, Sylvie van der Werf                                                                                                                                                                                                                                                                                                                                                                                                           |
| EPI_ISL_415650                                                                 | Hôpital Instruction des Armées - BEGIN                                                                                                                                                                           | National Reference Center for Viruses of Respiratory Infections, Institut Pasteur, Paris                                | Mélinie Albert, Marion Barbet, Sylvie Behillil, Méline Bizard, Angela Brisebarre, Flora Donati Vincent Enouf, Maud Vanpeene, Sylvie van der Werf, Christine Bigaillon                                                                                                                                                                                                                                                                                                                                                                                      |
| EPI_ISL_415651                                                                 | Unknown                                                                                                                                                                                                          | National Reference Center for Viruses of Respiratory Infections, Institut Pasteur, Paris                                | Mélinie Albert, Marion Barbet, Sylvie Behillil, Méline Bizard, Angela Brisebarre, Flora Donati Vincent Enouf, Maud Vanpeene, Sylvie van der Werf                                                                                                                                                                                                                                                                                                                                                                                                           |
| EPI_ISL_415652                                                                 | unknown                                                                                                                                                                                                          | National Reference Center for Viruses of Respiratory Infections, Institut Pasteur, Paris                                | Mélinie Albert, Marion Barbet, Sylvie Behillil, Méline Bizard, Angela Brisebarre, Flora Donati Vincent Enouf, Maud Vanpeene, Sylvie van der Werf                                                                                                                                                                                                                                                                                                                                                                                                           |
| EPI_ISL_415654                                                                 | Centre Hospitalier Compiegne Laboratoire de Biologie                                                                                                                                                             | National Reference Center for Viruses of Respiratory Infections, Institut Pasteur, Paris                                | Mélinie Albert, Marion Barbet, Sylvie Behillil, Méline Bizard, Angela Brisebarre, Flora Donati Vincent Enouf, Maud Vanpeene, Sylvie van der Werf, Raulin Olivia                                                                                                                                                                                                                                                                                                                                                                                            |
| EPI_ISL_415710                                                                 | WHO National Influenza Centre Russian Federation                                                                                                                                                                 | WHO National Influenza Centre Russian Federation                                                                        | Andrey Komissarov, Artem Fadeev, Anna Ivanova, Daria Danilenko                                                                                                                                                                                                                                                                                                                                                                                                                                                                                             |
| EPI_ISL_416028                                                                 | National Influenza Center - Instituto Adolfo Lutz                                                                                                                                                                | Instituto Adolfo Lutz, Interdisciplinary Procedures Center, Strategic Laboratory                                        | Claudio Tavares Sacchi, Claudia Regina Gonçalves, Carlos Henrique Camargo, Fabiana Cristina Pereira dos Santos, Daniela Bernardes Borges da Silva, Simone Guadagnucci Morillo, Adriano Abbud, Adriana Bugno, Maria do Carmo Sampaio Tavares Timenetsky, Terezinha Maria de Paiva                                                                                                                                                                                                                                                                           |

|                                                                                                                                                                                                                                                                                                                                                                                                                                                                                                                                                                                                                                |                                                                                                                                                               |                                                                                                                                                               |                                                                                                                                                                                                                                                                                                                                                                                                                                                                               |
|--------------------------------------------------------------------------------------------------------------------------------------------------------------------------------------------------------------------------------------------------------------------------------------------------------------------------------------------------------------------------------------------------------------------------------------------------------------------------------------------------------------------------------------------------------------------------------------------------------------------------------|---------------------------------------------------------------------------------------------------------------------------------------------------------------|---------------------------------------------------------------------------------------------------------------------------------------------------------------|-------------------------------------------------------------------------------------------------------------------------------------------------------------------------------------------------------------------------------------------------------------------------------------------------------------------------------------------------------------------------------------------------------------------------------------------------------------------------------|
| EPI_ISL_416029                                                                                                                                                                                                                                                                                                                                                                                                                                                                                                                                                                                                                 | Laboratório Fleury                                                                                                                                            | Instituto Adolfo Lutz, Interdisciplinary Procedures Center, Strategic Laboratory                                                                              | Claudio Tavares Sacchi, Claudia Regina Gonçalves, Carlos Henrique Camargo, Fabiana Cristina Pereira dos Santos, Daniela Bernardes Borges da Silva, Simone Guadagnucci Morillo, Adriano Abbud, Adriana Bugno, Maria do Carmo Sampaio Tavares Timenetsky, Terezinha Maria de Paiva                                                                                                                                                                                              |
| EPI_ISL_416031, EPI_ISL_416032                                                                                                                                                                                                                                                                                                                                                                                                                                                                                                                                                                                                 | National Influenza Center - Instituto Adolfo Lutz                                                                                                             | Instituto Adolfo Lutz, Interdisciplinary Procedures Center, Strategic Laboratory                                                                              | Claudio Tavares Sacchi, Claudia Regina Gonçalves, Carlos Henrique Camargo, Fabiana Cristina Pereira dos Santos, Daniela Bernardes Borges da Silva, Simone Guadagnucci Morillo, Adriano Abbud, Adriana Bugno, Maria do Carmo Sampaio Tavares Timenetsky, Terezinha Maria de Paiva                                                                                                                                                                                              |
| EPI_ISL_416033, EPI_ISL_416034                                                                                                                                                                                                                                                                                                                                                                                                                                                                                                                                                                                                 | Hospital Israelita Albert Einstein                                                                                                                            | Instituto Adolfo Lutz, Interdisciplinary Procedures Center, Strategic Laboratory                                                                              | Claudio Tavares Sacchi, Claudia Regina Gonçalves, Carlos Henrique Camargo, Erica Valessa Ramos Gomes, Fabiana Cristina Pereira dos Santos, Daniela Bernardes Borges da Silva, Simone Guadagnucci Morillo, Adriano Abbud, Adriana Bugno, Maria do Carmo Sampaio Tavares Timenetsky, Terezinha Maria de Paiva                                                                                                                                                                   |
| EPI_ISL_416035, EPI_ISL_416036                                                                                                                                                                                                                                                                                                                                                                                                                                                                                                                                                                                                 | National Influenza Center - Instituto Adolfo Lutz                                                                                                             | Instituto Adolfo Lutz, Interdisciplinary Procedures Center, Strategic Laboratory                                                                              | Claudio Tavares Sacchi, Claudia Regina Gonçalves, Carlos Henrique Camargo, Erica Valessa Ramos Gomes, Fabiana Cristina Pereira dos Santos, Daniela Bernardes Borges da Silva, Simone Guadagnucci Morillo, Adriano Abbud, Adriana Bugno, Maria do Carmo Sampaio Tavares Timenetsky, Terezinha Maria de Paiva                                                                                                                                                                   |
| EPI_ISL_416142                                                                                                                                                                                                                                                                                                                                                                                                                                                                                                                                                                                                                 | Department of Virus and Microbiological Special diagnostics, Statens Serum Institut, Copenhagen, Denmark.                                                     | Statens Serum Institute                                                                                                                                       | Morten Rasmussen, Maiken Worsøe Rosenstjerne , Anders Fomsgaard                                                                                                                                                                                                                                                                                                                                                                                                               |
| EPI_ISL_416143, EPI_ISL_416144                                                                                                                                                                                                                                                                                                                                                                                                                                                                                                                                                                                                 | Department of Virus and Microbiological Special diagnostics, Statens Serum Institut, Copenhagen, Denmark.                                                     | VIFU                                                                                                                                                          | Morten Rasmussen, Maiken Worsøe Rosenstjerne , Anders Fomsgaard                                                                                                                                                                                                                                                                                                                                                                                                               |
| EPI_ISL_416426                                                                                                                                                                                                                                                                                                                                                                                                                                                                                                                                                                                                                 | Virological Research Group, Szentágotthai Research Centre, University of Pécs                                                                                 | Bioinformatics Research Group, Szentágotthai Research Centre, University of Pécs                                                                              | Péter Urbán, Endre Gábor Tóth, Gábor Kemenesi, Róbert Herczeg, Attila Gyenesei, Ferenc Jakab                                                                                                                                                                                                                                                                                                                                                                                  |
| EPI_ISL_416458                                                                                                                                                                                                                                                                                                                                                                                                                                                                                                                                                                                                                 | Virology laboratory Ministry of Health Kuwait sequenced at Dasman Diabetes Institute                                                                          | Dasman Diabetes Institute                                                                                                                                     | Fahd Al-Mulla, Sumi John, Sara Alqabandi, Rasheeba Iqbal, Motasem Melhem, Ebaa alOzairi, Qais Al-Duwairi                                                                                                                                                                                                                                                                                                                                                                      |
| EPI_ISL_416469, EPI_ISL_416470, EPI_ISL_416471, EPI_ISL_416472, EPI_ISL_416475                                                                                                                                                                                                                                                                                                                                                                                                                                                                                                                                                 | KU Leuven, Clinical and Epidemiological Virology                                                                                                              | KU Leuven, Clinical and Epidemiological Virology                                                                                                              | Bert Vanmechelen, Tony Wawina, Joan Marti-Carreras, Piet Maes                                                                                                                                                                                                                                                                                                                                                                                                                 |
| EPI_ISL_416485                                                                                                                                                                                                                                                                                                                                                                                                                                                                                                                                                                                                                 | Servicio de Microbiología. Consorcio Hospital General Universitario de Valencia                                                                               | Sequencing and Bioinformatics Service and Molecular Epidemiology Research Group. FISABIO-Public Health                                                        | Griselda De Marco, Neris Garcia-Gonzalez, Maria Alma Bracho, Maria Dolores Ocete, Concepcion Gimeno, Giuseppe D'Auria, Fernando Gonzalez-Candelas                                                                                                                                                                                                                                                                                                                             |
| EPI_ISL_416486                                                                                                                                                                                                                                                                                                                                                                                                                                                                                                                                                                                                                 | Servicio de Microbiología. Consorcio Hospital General Universitario de Valencia                                                                               | Sequencing and Bioinformatics Service and Molecular Epidemiology Research Group. FISABIO-Public Health                                                        | Neris Garcia-Gonzalez, Maria Alma Bracho, Maria Dolores Ocete, Concepcion Gimeno, Giuseppe D'Auria, Griselda De Marco, Fernando Gonzalez-Candelas                                                                                                                                                                                                                                                                                                                             |
| EPI_ISL_416487                                                                                                                                                                                                                                                                                                                                                                                                                                                                                                                                                                                                                 | Servicio de Microbiología. Consorcio Hospital General Universitario de Valencia                                                                               | Sequencing and Bioinformatics Service and Molecular Epidemiology Research Group. FISABIO-Public Health                                                        | Giuseppe D'Auria, Griselda De Marco, Neris Garcia-Gonzalez, Maria Alma Bracho, Maria Dolores Ocete, Concepcion Gimeno, Fernando Gonzalez-Candelas                                                                                                                                                                                                                                                                                                                             |
| EPI_ISL_416488                                                                                                                                                                                                                                                                                                                                                                                                                                                                                                                                                                                                                 | ViroGenetics - BSL3 Laboratory of Virology; Human Genome Variation Research Group & Genomics Centre MCB; Bioinformatics Research Group Department of Virology | ViroGenetics - BSL3 Laboratory of Virology; Human Genome Variation Research Group & Genomics Centre MCB; Bioinformatics Research Group Department of Virology | Aleksandra Milewska, Ewelina Pośpiech, Agata Jarosz, Adrianna Klajmon, Kamila Marszałek, Katarzyna Pancer, Magdalena Rzczykowska, Tomasz Wolkowicz, Katarzyna Zacharczuk, Agnieszka Kolakowska-Kulesza, Natalia Wolaniuk, Ewelina Hallman-Szełnińska, Paweł P Labaj, Wojciech Branicki, Krzysztof Pyrc                                                                                                                                                                        |
| EPI_ISL_416493                                                                                                                                                                                                                                                                                                                                                                                                                                                                                                                                                                                                                 | CH Jean de Navarre Laboratoire de Biologie                                                                                                                    | National Reference Center for Viruses of Respiratory Infections, Institut Pasteur, Paris                                                                      | Mélinie Albert, Marion Barbet, Sylvie Behillil, Méline Bizard, Angela Brisebarre, Flora Donati, Etienne Simon-Lorière, Vincent Enouf, Maud Vanpeene, Sylvie van der Werf                                                                                                                                                                                                                                                                                                      |
| EPI_ISL_416494                                                                                                                                                                                                                                                                                                                                                                                                                                                                                                                                                                                                                 | Centre Hospitalier Universitaire de Rouen Laboratoire de Virologie                                                                                            | National Reference Center for Viruses of Respiratory Infections, Institut Pasteur, Paris                                                                      | Mélinie Albert, Marion Barbet, Sylvie Behillil, Méline Bizard, Angela Brisebarre, Flora Donati, Etienne Simon-Lorière, Vincent Enouf, Maud Vanpeene, Sylvie van der Werf, Jean-Christophe Plantier                                                                                                                                                                                                                                                                            |
| EPI_ISL_416495, EPI_ISL_416496, EPI_ISL_416497                                                                                                                                                                                                                                                                                                                                                                                                                                                                                                                                                                                 | Centre Hospitalier Compiègne Laboratoire de Biologie                                                                                                          | National Reference Center for Viruses of Respiratory Infections, Institut Pasteur, Paris                                                                      | Mélinie Albert, Marion Barbet, Sylvie Behillil, Méline Bizard, Angela Brisebarre, Flora Donati, Etienne Simon-Lorière, Vincent Enouf, Maud Vanpeene, Sylvie van der Werf, Raulin Olivia                                                                                                                                                                                                                                                                                       |
| EPI_ISL_416498                                                                                                                                                                                                                                                                                                                                                                                                                                                                                                                                                                                                                 | Institut Médico légal- Hop R. Poincaré                                                                                                                        | National Reference Center for Viruses of Respiratory Infections, Institut Pasteur, Paris                                                                      | Mélinie Albert, Marion Barbet, Sylvie Behillil, Méline Bizard, Angela Brisebarre, Flora Donati, Etienne Simon-Lorière, Vincent Enouf, Maud Vanpeene, Sylvie van der Werf                                                                                                                                                                                                                                                                                                      |
| EPI_ISL_416499, EPI_ISL_416500                                                                                                                                                                                                                                                                                                                                                                                                                                                                                                                                                                                                 | LABM GH nord Essonne                                                                                                                                          | National Reference Center for Viruses of Respiratory Infections, Institut Pasteur, Paris                                                                      | Mélinie Albert, Marion Barbet, Sylvie Behillil, Méline Bizard, Angela Brisebarre, Flora Donati, Etienne Simon-Lorière, Vincent Enouf, Maud Vanpeene, Sylvie van der Werf                                                                                                                                                                                                                                                                                                      |
| EPI_ISL_416501                                                                                                                                                                                                                                                                                                                                                                                                                                                                                                                                                                                                                 | Hopital franco britannique - Service des Urgences                                                                                                             | National Reference Center for Viruses of Respiratory Infections, Institut Pasteur, Paris                                                                      | Mélinie Albert, Marion Barbet, Sylvie Behillil, Méline Bizard, Angela Brisebarre, Flora Donati, Etienne Simon-Lorière, Vincent Enouf, Maud Vanpeene, Sylvie van der Werf                                                                                                                                                                                                                                                                                                      |
| EPI_ISL_416502, EPI_ISL_416503, EPI_ISL_416504, EPI_ISL_416505, EPI_ISL_416506, EPI_ISL_416507, EPI_ISL_416508, EPI_ISL_416509, EPI_ISL_416510, EPI_ISL_416511, EPI_ISL_416512, EPI_ISL_416513                                                                                                                                                                                                                                                                                                                                                                                                                                 | see above                                                                                                                                                     | see above                                                                                                                                                     | see above                                                                                                                                                                                                                                                                                                                                                                                                                                                                     |
| EPI_ISL_416565, EPI_ISL_416566, EPI_ISL_416567, EPI_ISL_416568, EPI_ISL_416569, EPI_ISL_416570, EPI_ISL_416571, EPI_ISL_416572, EPI_ISL_416573, EPI_ISL_416574, EPI_ISL_416575, EPI_ISL_416576, EPI_ISL_416577, EPI_ISL_416578                                                                                                                                                                                                                                                                                                                                                                                                 | see above                                                                                                                                                     | see above                                                                                                                                                     | see above                                                                                                                                                                                                                                                                                                                                                                                                                                                                     |
| EPI_ISL_416592, EPI_ISL_416593, EPI_ISL_416594, EPI_ISL_416595, EPI_ISL_416596, EPI_ISL_416597, EPI_ISL_416598, EPI_ISL_416599, EPI_ISL_416600, EPI_ISL_416601, EPI_ISL_416602, EPI_ISL_416603, EPI_ISL_416604, EPI_ISL_416605, EPI_ISL_416606, EPI_ISL_416607, EPI_ISL_416608, EPI_ISL_416609, EPI_ISL_416610, EPI_ISL_416611, EPI_ISL_416612, EPI_ISL_416613, EPI_ISL_416614, EPI_ISL_416615, EPI_ISL_416617, EPI_ISL_416618, EPI_ISL_416619, EPI_ISL_416620, EPI_ISL_416621, EPI_ISL_416622, EPI_ISL_416623, EPI_ISL_416624, EPI_ISL_416625, EPI_ISL_416626, EPI_ISL_416627, EPI_ISL_416628, EPI_ISL_416629, EPI_ISL_416630 | see above                                                                                                                                                     | see above                                                                                                                                                     |                                                                                                                                                                                                                                                                                                                                                                                                                                                                               |
| see above                                                                                                                                                                                                                                                                                                                                                                                                                                                                                                                                                                                                                      | Japanese Quarantine Stations                                                                                                                                  | Pathogen Genomics Center, National Institute of Infectious Diseases                                                                                           | Mélinie Albert, Marion Barbet, Sylvie Behillil, Méline Bizard, Angela Brisebarre, Flora Donati, Etienne Simon-Lorière, Vincent Enouf, Maud Vanpeene, Sylvie van der Werf, Gisèle Lagathu Yamagishi, Motoi Suzuki, Takaji Wakita, Makoto Kuroda                                                                                                                                                                                                                                |
| EPI_ISL_416744                                                                                                                                                                                                                                                                                                                                                                                                                                                                                                                                                                                                                 | Virological Research Group, Szentágotthai Research Centre                                                                                                     | Bioinformatics Research Group, Szentágotthai Research Centre                                                                                                  | Péter Urbán, Endre Gábor Tóth, Gábor Kemenesi, Róbert Herczeg, Attila Gyenesei, Ferenc Jakab                                                                                                                                                                                                                                                                                                                                                                                  |
| EPI_ISL_416829                                                                                                                                                                                                                                                                                                                                                                                                                                                                                                                                                                                                                 | National Public Health Laboratory                                                                                                                             | Malaysia Genome Institute                                                                                                                                     | Mohd Noor Mat Isa, Irm Suhayu Sapian, Yusuf Muhammad Noor, Nurhezreen Md Iqbal, Mohd Faizal Abu Bakar, Enizza Kasim, Shamsidar Sophie, Siti Noraini Othman, Azrin Ahmad, Nor Azfa Johari, Norazimah Tajudin, Noorliza Mohamad Noordin, W Afiza W Mohd Arifin, Rehan Shuhada Abu Bakar, Yu Kie Chem, Selvanesan Sengol, Hani Mat Hussin, Shahrul Hisham Zainal Ariffin                                                                                                         |
| EPI_ISL_416866                                                                                                                                                                                                                                                                                                                                                                                                                                                                                                                                                                                                                 | National Public Health Laboratory                                                                                                                             | Malaysia Genome Institute                                                                                                                                     | Mohd Noor Mat Isa, Irm Suhayu Sapian, Yusuf Muhammad Noor, Nurhezreen Md Iqbal, Mohd Faizal Abu Bakar, Enizza Kasim, Shamsidar Sophie, Siti Noraini Othman, Azrin Ahmad, Nor Azfa Johari, Norazimah Tajudin, Noorliza Mohamad Noordin, W Afiza W Mohd Arifin, Rehan Shuhada Abu Bakar, Yu Kie Chem, Selvanesan Sengol, Hani Mat Hussin, Shahrul Hisham Zainal Ariffin                                                                                                         |
| EPI_ISL_416885, EPI_ISL_416886                                                                                                                                                                                                                                                                                                                                                                                                                                                                                                                                                                                                 | National Public Health Laboratory                                                                                                                             | Malaysia Genome Institute                                                                                                                                     | Mohd Noor Mat Isa, Irm Suhayu Sapian, Yusuf Muhammad Noor, Nurhezreen Md Iqbal, Mohd Faizal Abu Bakar, Enizza Kasim, Shamsidar Sophie, Siti Noraini Othman, Azrin Ahmad, Nor Azfa Johari, Norazimah Tajudin, Noorliza Mohamad Noordin, W Afiza W Mohd Arifin, Rehan Shuhada Abu Bakar, Yu Kie Chem, Selvanesan Sengol, Hani Mat Hussin, Shahrul Hisham Zainal Ariffin                                                                                                         |
| EPI_ISL_416907                                                                                                                                                                                                                                                                                                                                                                                                                                                                                                                                                                                                                 | National Public Health Laboratory                                                                                                                             | Malaysia Genome Institute                                                                                                                                     | Mohd Noor Mat Isa, Irm Suhayu Sapian, Yusuf Muhammad Noor, Nurhezreen Md Iqbal, Mohd Faizal Abu Bakar, Enizza Kasim, Shamsidar Sophie, Siti Noraini Othman, Azrin Ahmad, Nor Azfa Johari, Norazimah Tajudin, Noorliza Mohamad Noordin, W Afiza W Mohd Arifin, Rehan Shuhada Abu Bakar, Yu Kie Chem, Selvanesan Sengol, Hani Mat Hussin, Shahrul Hisham Zainal Ariffin                                                                                                         |
| EPI_ISL_416994                                                                                                                                                                                                                                                                                                                                                                                                                                                                                                                                                                                                                 | COMPLEJO ASISTENCIAL UNIVERSITARIO DE BURGOS                                                                                                                  | Instituto de Salud Carlos III                                                                                                                                 | Iglesias-Caballero, M. Molinero Calamita, M. González-Esguevillas, M. Camarero S. Pozo F. Casas I. Jiménez P. Jiménez M. Zaballos A. Monzón, S. Varona, S. Juliá M. Cuesta I. Megias Lobón, G. Hospital: -----                                                                                                                                                                                                                                                                |
| EPI_ISL_417007                                                                                                                                                                                                                                                                                                                                                                                                                                                                                                                                                                                                                 | HOSPITAL SANTA MARIA NAI                                                                                                                                      | Instituto de Salud Carlos III                                                                                                                                 | Iglesias-Caballero, M. Molinero Calamita, M. González-Esguevillas, M. Camarero S. Pozo F. Casas I. Jiménez P. Jiménez M. Zaballos A. Monzón, S. Varona, S. Juliá, M. Cuesta, I. García Costa, J.                                                                                                                                                                                                                                                                              |
| EPI_ISL_417010                                                                                                                                                                                                                                                                                                                                                                                                                                                                                                                                                                                                                 | FUNDACION JIMENEZ DIAZ                                                                                                                                        | Instituto de Salud Carlos III                                                                                                                                 | Iglesias-Caballero, M. Molinero Calamita, M. González-Esguevillas, M. Camarero S. Pozo, F. Casas, I. Jiménez P. Jiménez M. Zaballos, A. Monzón, S. Varona, S. Juliá, M. Cuesta, I. Fernández Roblas, R.                                                                                                                                                                                                                                                                       |
| EPI_ISL_417015, EPI_ISL_417016, EPI_ISL_417018, EPI_ISL_417019                                                                                                                                                                                                                                                                                                                                                                                                                                                                                                                                                                 | Department of Clinical Microbiology                                                                                                                           | GIGA Medical Genomics                                                                                                                                         | Durkin Keith, Artesi Maria, Bontems Sébastien, Boreux Raphaël, Meex Cécile, Melin Pierrette, Hayette Marie-Pierre, Bours Vincent.                                                                                                                                                                                                                                                                                                                                             |
| EPI_ISL_417030                                                                                                                                                                                                                                                                                                                                                                                                                                                                                                                                                                                                                 | Centre for Infectious Diseases and Microbiology Laboratory Services                                                                                           | NSW Health Pathology - Institute of Clinical Pathology and Medical Research; Westmead Hospital; University of Sydney                                          | Eden J-S, Rockett R, Carter I, Rahman H, Holmes EC, O'Sullivan MV, Sintchenko V, Chen SC, Maddocks S, Kok J and Dwyer DE for the 2019-nCoV Study Group*                                                                                                                                                                                                                                                                                                                       |
| EPI_ISL_417034                                                                                                                                                                                                                                                                                                                                                                                                                                                                                                                                                                                                                 | Laboratório de Ecologia de Doenças Transmissíveis na Amazonia, Instituto Leonidas e Maria Deane - Fiocruz Amazonia                                            | Laboratório de Ecologia de Doenças Transmissíveis na Amazonia, Instituto Leonidas e Maria Deane - Fiocruz Amazonia                                            | Valdinete Nascimento, André Corado, Fernanda Nascimento, Ágatha Costa, Debora Duarte, Luciana Gonçalves, Michele Jesus, Sérgio Luz, Felipe Naveca                                                                                                                                                                                                                                                                                                                             |
| EPI_ISL_417176                                                                                                                                                                                                                                                                                                                                                                                                                                                                                                                                                                                                                 | Department of Pathology, Princess Margaret Hospital                                                                                                           | Department of Health Technology and Informatics, Faculty of Health and Social Science, The Hong Kong Polytechnic University                                   | Kenneth Siu-Sing LEUNG, Timothy Ting-Leung NG, Alan Ka-Lun WU, Miranda Chong-Yee YAU, Hiu-Yin LAO, Ming-Pan CHOI, Kingsley King-Gee TAM, Lam-Kwong LEE, Barry Kin-Chung WONG, Alex Yat-Man HO, Kam-Tong Yip, Kwok-Cheung LUNG, Raymond Wai-To LIU, Eugene Yuk-Keung TSO, Wai-Shing LEUNG, Man-Chun CHAN, Yuk-Yung NG, Kit-Man SIN, Kitty Sau-Chun FUNG, Sandy Ka-Yee CHAU, Wing-Kin TO, Tak-Lun Que, David Ho-Keung SHUM, Shea Ping YIP, Wing Cheong YAM, Gilman Kit-Hang SIU |
| EPI_ISL_417181, EPI_ISL_417185                                                                                                                                                                                                                                                                                                                                                                                                                                                                                                                                                                                                 | Department of Pathology, United Christian Hospital                                                                                                            | Department of Health Technology and Informatics, Faculty of Health and Social Science, The Hong Kong Polytechnic University                                   | Kenneth Siu-Sing LEUNG, Timothy Ting-Leung NG, Alan Ka-Lun WU, Miranda Chong-Yee YAU, Hiu-Yin LAO, Ming-Pan CHOI, Kingsley King-Gee TAM, Lam-Kwong LEE, Barry Kin-Chung WONG, Alex Yat-Man HO, Kam-Tong Yip, Kwok-Cheung LUNG, Raymond Wai-To LIU, Eugene Yuk-Keung TSO, Wai-Shing LEUNG, Man-Chun CHAN, Yuk-Yung NG, Kit-Man SIN, Kitty Sau-Chun FUNG, Sandy Ka-Yee CHAU, Wing-Kin TO, Tak-Lun Que, David Ho-Keung SHUM, Shea Ping YIP, Wing Cheong YAM, Gilman Kit-Hang SIU |
| EPI_ISL_417186                                                                                                                                                                                                                                                                                                                                                                                                                                                                                                                                                                                                                 | National Institute for Communicable Diseases of the National Health Laboratory Service                                                                        | National Institute for Communicable Diseases of the National Health Laboratory Service                                                                        | Allam M, Kwenda S, van Heusden P, Khumalo Z, Mohale T, Subramoney K, von Gottberg, A, Ismail A, Bhiham JN                                                                                                                                                                                                                                                                                                                                                                     |
| EPI_ISL_417187, EPI_ISL_417188, EPI_ISL_417193                                                                                                                                                                                                                                                                                                                                                                                                                                                                                                                                                                                 | Department of Clinical Pathology, Pamela Youde Nethersole Eastern Hospital                                                                                    | Department of Health Technology and Informatics, Faculty of Health and Social Science, The Hong Kong Polytechnic University                                   | Kenneth Siu-Sing LEUNG, Timothy Ting-Leung NG, Alan Ka-Lun WU, Miranda Chong-Yee YAU, Hiu-Yin LAO, Ming-Pan CHOI, Kingsley King-Gee TAM, Lam-Kwong LEE, Barry Kin-Chung WONG, Alex Yat-Man HO, Kam-Tong Yip, Kwok-Cheung LUNG, Raymond Wai-To LIU, Eugene Yuk-Keung TSO, Wai-Shing LEUNG, Man-Chun CHAN, Yuk-Yung NG, Kit-Man SIN, Kitty Sau-Chun FUNG, Sandy Ka-Yee CHAU, Wing-Kin TO, Tak-Lun Que, David Ho-Keung SHUM, Shea Ping YIP, Wing Cheong YAM, Gilman Kit-Hang SIU |
| EPI_ISL_417333, EPI_ISL_417334, EPI_ISL_417335, EPI_ISL_417336, EPI_ISL_417337, EPI_ISL_417339                                                                                                                                                                                                                                                                                                                                                                                                                                                                                                                                 | Institut des Agents Infectieux (IAI), Hospices Civils de Lyon                                                                                                 | CNR Virus des Infections Respiratoires - France SUD                                                                                                           | Antonin Bal, Gregory Destras, Weerdolynne Burfin, Solenne Brun, Carine Moustaud, Raphaëlle Lamy, Alexandre Gaymard, Maude Bouscambert-Duchamp, Florence Morfin-Sherpa, Martine Valette, Laurence Josset, Bruno Lina                                                                                                                                                                                                                                                           |
| EPI_ISL_417443                                                                                                                                                                                                                                                                                                                                                                                                                                                                                                                                                                                                                 | State Key Laboratory for Emerging Infectious Diseases Department of Microbiology Li Ka Shing Faculty of Medicine The University of Hong Kong                  | State Key Laboratory for Emerging Infectious Diseases Department of Microbiology Li Ka Shing Faculty of Medicine The University of Hong Kong                  | Pui Wang, Siu-Ying Lau, Shaofeng Deng, Bobo Wing-Yee Mok, Wenjun Song, Kwok-Yung Yuen, Honglin Chen                                                                                                                                                                                                                                                                                                                                                                           |
| EPI_ISL_417491                                                                                                                                                                                                                                                                                                                                                                                                                                                                                                                                                                                                                 | Virology Laboratory, Department of Biomedical Sciences and Public Health, University Politecnica delle Marche                                                 | Virology and Legal Medicine Laboratories, Department of Biomedical Sciences and Public Health, University Politecnica delle Marche                            | Bagnarelli, P., Caucci, S., Di Sante, L., Menzo, S., Alessandrini, F., Onofri, V., Turchi, C., Tagliabracchi, A.                                                                                                                                                                                                                                                                                                                                                              |
| EPI_ISL_417877                                                                                                                                                                                                                                                                                                                                                                                                                                                                                                                                                                                                                 | Institute of Virology, Biomedical Research Center of the Slovak Academy of Sciences, Bratislava; Comenius University                                          | Institute of Virology, Biomedical Research Center of the Slovak Academy of Sciences, Bratislava; Comenius University                                          | Monika Sláviková, Martina Ličková, Sabina Fumacová Havilíková, Juraj Kočí, Juraj Kopaček, Elena Tichá, Edita Staronová, Jaroslav Budiš, Werner Krampfl, Miroslav Böhmer, Diana                                                                                                                                                                                                                                                                                                |

|                                                                                                                                                                                                |                                                                                                                                                                                                                               |                                                                                                                                                                                                                               |  |                                                                                                                                                                                                                                                                                                                                                                                                                                                                               |
|------------------------------------------------------------------------------------------------------------------------------------------------------------------------------------------------|-------------------------------------------------------------------------------------------------------------------------------------------------------------------------------------------------------------------------------|-------------------------------------------------------------------------------------------------------------------------------------------------------------------------------------------------------------------------------|--|-------------------------------------------------------------------------------------------------------------------------------------------------------------------------------------------------------------------------------------------------------------------------------------------------------------------------------------------------------------------------------------------------------------------------------------------------------------------------------|
|                                                                                                                                                                                                | Slovak Academy of Sciences, Bratislava; Public Health Authority of the Slovak Republic, Bratislava                                                                                                                            | Science Park, Bratislava                                                                                                                                                                                                      |  | Rušňáková, Tomáš Szemeš, Boris Klempa                                                                                                                                                                                                                                                                                                                                                                                                                                         |
| EPI_ISL_417878                                                                                                                                                                                 | Institute of Virology, Biomedical Research Center of the Slovak Academy of Sciences, Bratislava; Public Health Authority of the Slovak Republic, Bratislava                                                                   | Institute of Virology, Biomedical Research Center of the Slovak Academy of Sciences, Bratislava; Comenius University Science Park, Bratislava                                                                                 |  | Monika Sláviková, Martina Ličková, Sabina Fumačová Havlíková, Juraj Kočí, Juraj Kopáček, Elena Tichá, Edita Staroňová, Jaroslav Budíš, Werner Krampfl, Miroslav Böhmer, Diana Rusňáková, Tomáš Szemeš, Boris Klempa                                                                                                                                                                                                                                                           |
| EPI_ISL_417879                                                                                                                                                                                 | Institute of Virology, Biomedical Research Center of the Slovak Academy of Sciences, Bratislava; Public Health Authority of the Slovak Republic, Bratislava                                                                   | Institute of Virology, Biomedical Research Center of the Slovak Academy of Sciences, Bratislava; Comenius University Science Park, Bratislava                                                                                 |  | Monika Sláviková, Martina Ličková, Sabina Fumačová Havlíková, Juraj Kočí, Juraj Kopáček, Elena Tichá, Edita Staroňová, Jaroslav Budíš, Werner Krampfl, Miroslav Böhmer, Diana Rusňáková, Tomáš Szemeš, Boris Klempa                                                                                                                                                                                                                                                           |
| EPI_ISL_417880                                                                                                                                                                                 | Institute of Virology, Biomedical Research Center of the Slovak Academy of Sciences, Bratislava; Public Health Authority of the Slovak Republic, Bratislava                                                                   | Institute of Virology, Biomedical Research Center of the Slovak Academy of Sciences, Bratislava; Comenius University Science Park, Bratislava                                                                                 |  | Monika Sláviková, Martina Ličková, Sabina Fumačová Havlíková, Juraj Kočí, Juraj Kopáček, Elena Tichá, Edita Staroňová, Jaroslav Budíš, Werner Krampfl, Miroslav Böhmer, Diana Rusňáková, Tomáš Szemeš, Boris Klempa                                                                                                                                                                                                                                                           |
| EPI_ISL_417924                                                                                                                                                                                 | Secretaría de Salud Medellín                                                                                                                                                                                                  | Instituto Nacional de Salud, Universidad Cooperativa de Colombia, Instituto Alexander von Humboldt, Imperial College-London, London School of Hygiene & Tropical Medicine                                                     |  | Marcela Mercado-Reyes, Katherine Laiton-Donato, Diego A. Álvarez-Díaz, Carlos Franco-Muñoz, Jose A. Usme-Ciro, Gloria Puerto, Nicolás D. Franco-Sierra, Mailyn A. Gonzalez, Zulma M. Cucunubá, Christian Julian Villabona-Arenas, Liz Villabona-Arenas, Sussy Echeverría-Londoño, Astrid C. Flórez, Sergio Gomez Rangel, Luz Dary Rodriguez, Juliana Barbosa, Erika Ospitia, Diana Marcela Walteros-Acero, Martha Lucia Ospina Martinez                                       |
| EPI_ISL_418183                                                                                                                                                                                 | Virological Research Group, Szentágotthai Research Centre                                                                                                                                                                     | Bioinformatics Research Group, Szentágotthai Research Centre                                                                                                                                                                  |  | Péter Urbán, Endre Gábor Tóth, Gábor Kemenesi, Róbert Herczeg, Attila Gyeneseli, Ferenc Jakab                                                                                                                                                                                                                                                                                                                                                                                 |
| EPI_ISL_418206, EPI_ISL_418207, EPI_ISL_418208, EPI_ISL_418209, EPI_ISL_418210, EPI_ISL_418211                                                                                                 | Institut Pasteur Dakar                                                                                                                                                                                                        | Institut Pasteur de Dakar                                                                                                                                                                                                     |  | Ndongo Dia, Ousmane Faye, Amadou Alpha Sall                                                                                                                                                                                                                                                                                                                                                                                                                                   |
| EPI_ISL_418212                                                                                                                                                                                 | Institut Pasteur Dakar                                                                                                                                                                                                        | Institut Pasteur de Dakar                                                                                                                                                                                                     |  | Ndongo Dia, Ousmane Faye, Amadou Alpha Sall                                                                                                                                                                                                                                                                                                                                                                                                                                   |
| EPI_ISL_418213                                                                                                                                                                                 | Institut Pasteur Dakar                                                                                                                                                                                                        | Institut Pasteur de Dakar                                                                                                                                                                                                     |  | Ndongo Dia, Ousmane Faye, Amadou Alpha Sall                                                                                                                                                                                                                                                                                                                                                                                                                                   |
| EPI_ISL_418215                                                                                                                                                                                 | Institut Pasteur Dakar                                                                                                                                                                                                        | Institut Pasteur de Dakar                                                                                                                                                                                                     |  | Ndongo Dia, Ousmane Faye, Amadou Alpha Sall                                                                                                                                                                                                                                                                                                                                                                                                                                   |
| EPI_ISL_418216, EPI_ISL_418217                                                                                                                                                                 | Institut Pasteur Dakar                                                                                                                                                                                                        | Institut Pasteur de Dakar                                                                                                                                                                                                     |  | Ndongo Dia, Ousmane Faye, Amadou Alpha Sall                                                                                                                                                                                                                                                                                                                                                                                                                                   |
| EPI_ISL_418218                                                                                                                                                                                 | Centre Hospitalier Compiègne Laboratoire de Biologie                                                                                                                                                                          | National Reference Center for Viruses of Respiratory Infections, Institut Pasteur, Paris                                                                                                                                      |  | Mélanie Albert, Marion Barbet, Sylvie Behillil, Méline Bizard, Angela Brisebarre, Flora Donati, Fabiana Gambaro, Etienne Simon-Lorière, Vincent Enouf, Maud Vanpeene, Sylvie van der Werf, Raulin Olivia                                                                                                                                                                                                                                                                      |
| EPI_ISL_418219                                                                                                                                                                                 | CHU - Hôpital Cavale Blanche - Labo. de Virologie                                                                                                                                                                             | National Reference Center for Viruses of Respiratory Infections, Institut Pasteur, Paris                                                                                                                                      |  | Mélanie Albert, Marion Barbet, Sylvie Behillil, Méline Bizard, Angela Brisebarre, Flora Donati, Fabiana Gambaro, Etienne Simon-Lorière, Vincent Enouf, Maud Vanpeene, Sylvie van der Werf, Léa Pilorge                                                                                                                                                                                                                                                                        |
| EPI_ISL_418220, EPI_ISL_418221                                                                                                                                                                 | Centre Hospitalier Compiègne Laboratoire de Biologie                                                                                                                                                                          | National Reference Center for Viruses of Respiratory Infections, Institut Pasteur, Paris                                                                                                                                      |  | Mélanie Albert, Marion Barbet, Sylvie Behillil, Méline Bizard, Angela Brisebarre, Flora Donati, Fabiana Gambaro, Etienne Simon-Lorière, Vincent Enouf, Maud Vanpeene, Sylvie van der Werf, Raulin Olivia                                                                                                                                                                                                                                                                      |
| EPI_ISL_418222                                                                                                                                                                                 | CHRU Bretonneau - Serv. Bacterio-Virol.                                                                                                                                                                                       | National Reference Center for Viruses of Respiratory Infections, Institut Pasteur, Paris                                                                                                                                      |  | Mélanie Albert, Marion Barbet, Sylvie Behillil, Méline Bizard, Angela Brisebarre, Flora Donati, Fabiana Gambaro, Etienne Simon-Lorière, Vincent Enouf, Maud Vanpeene, Sylvie van der Werf, Julien Marlet                                                                                                                                                                                                                                                                      |
| EPI_ISL_418223, EPI_ISL_418224, EPI_ISL_418225                                                                                                                                                 | Centre Hospitalier Compiègne Laboratoire de Biologie                                                                                                                                                                          | National Reference Center for Viruses of Respiratory Infections, Institut Pasteur, Paris                                                                                                                                      |  | Mélanie Albert, Marion Barbet, Sylvie Behillil, Méline Bizard, Angela Brisebarre, Flora Donati, Fabiana Gambaro, Etienne Simon-Lorière, Vincent Enouf, Maud Vanpeene, Sylvie van der Werf, Raulin Olivia                                                                                                                                                                                                                                                                      |
| EPI_ISL_418226                                                                                                                                                                                 | EHPAD - Résidences les Cèdres                                                                                                                                                                                                 | National Reference Center for Viruses of Respiratory Infections, Institut Pasteur, Paris                                                                                                                                      |  | Mélanie Albert, Marion Barbet, Sylvie Behillil, Méline Bizard, Angela Brisebarre, Flora Donati, Etienne Simon-Lorière, Vincent Enouf, Maud Vanpeene, Sylvie van der Werf                                                                                                                                                                                                                                                                                                      |
| EPI_ISL_418227, EPI_ISL_418228                                                                                                                                                                 | Centre Hospitalier Compiègne Laboratoire de Biologie                                                                                                                                                                          | National Reference Center for Viruses of Respiratory Infections, Institut Pasteur, Paris                                                                                                                                      |  | Mélanie Albert, Marion Barbet, Sylvie Behillil, Méline Bizard, Angela Brisebarre, Flora Donati, Etienne Simon-Lorière, Vincent Enouf, Maud Vanpeene, Sylvie van der Werf, Raulin Olivia                                                                                                                                                                                                                                                                                       |
| EPI_ISL_418229                                                                                                                                                                                 | Hopital franco britannique - Laboratoire                                                                                                                                                                                      | National Reference Center for Viruses of Respiratory Infections, Institut Pasteur, Paris                                                                                                                                      |  | Mélanie Albert, Marion Barbet, Sylvie Behillil, Méline Bizard, Angela Brisebarre, Flora Donati, Etienne Simon-Lorière, Vincent Enouf, Maud Vanpeene, Sylvie van der Werf, Marianne Asso Bonnet                                                                                                                                                                                                                                                                                |
| EPI_ISL_418230                                                                                                                                                                                 | Clinique AVERAY LA BROUSTE, Med. Polyvalente                                                                                                                                                                                  | National Reference Center for Viruses of Respiratory Infections, Institut Pasteur, Paris                                                                                                                                      |  | Mélanie Albert, Marion Barbet, Sylvie Behillil, Méline Bizard, Angela Brisebarre, Flora Donati, Etienne Simon-Lorière, Vincent Enouf, Maud Vanpeene, Sylvie van der Werf, Elsa Ngwem                                                                                                                                                                                                                                                                                          |
| EPI_ISL_418231                                                                                                                                                                                 | Centre Hospitalier Compiègne Laboratoire de Biologie                                                                                                                                                                          | National Reference Center for Viruses of Respiratory Infections, Institut Pasteur, Paris                                                                                                                                      |  | Mélanie Albert, Marion Barbet, Sylvie Behillil, Méline Bizard, Angela Brisebarre, Flora Donati, Etienne Simon-Lorière, Vincent Enouf, Maud Vanpeene, Sylvie van der Werf, Raulin Olivia                                                                                                                                                                                                                                                                                       |
| EPI_ISL_418232, EPI_ISL_418233                                                                                                                                                                 | Service des Urgences                                                                                                                                                                                                          | National Reference Center for Viruses of Respiratory Infections, Institut Pasteur, Paris                                                                                                                                      |  | Mélanie Albert, Marion Barbet, Sylvie Behillil, Méline Bizard, Angela Brisebarre, Flora Donati, Etienne Simon-Lorière, Vincent Enouf, Maud Vanpeene, Sylvie van der Werf, Boukber                                                                                                                                                                                                                                                                                             |
| EPI_ISL_418234                                                                                                                                                                                 | LABM GH nord Essonne                                                                                                                                                                                                          | National Reference Center for Viruses of Respiratory Infections, Institut Pasteur, Paris                                                                                                                                      |  | Mélanie Albert, Marion Barbet, Sylvie Behillil, Méline Bizard, Angela Brisebarre, Flora Donati, Etienne Simon-Lorière, Vincent Enouf, Maud Vanpeene, Sylvie van der Werf, Christine Lambert                                                                                                                                                                                                                                                                                   |
| EPI_ISL_418235                                                                                                                                                                                 | Cabinet médical                                                                                                                                                                                                               | National Reference Center for Viruses of Respiratory Infections, Institut Pasteur, Paris                                                                                                                                      |  | Mélanie Albert, Marion Barbet, Sylvie Behillil, Méline Bizard, Angela Brisebarre, Flora Donati, Etienne Simon-Lorière, Vincent Enouf, Maud Vanpeene, Sylvie van der Werf                                                                                                                                                                                                                                                                                                      |
| EPI_ISL_418236, EPI_ISL_418237, EPI_ISL_418238, EPI_ISL_418239                                                                                                                                 | Centre Hospitalier Compiègne Laboratoire de Biologie                                                                                                                                                                          | National Reference Center for Viruses of Respiratory Infections, Institut Pasteur, Paris                                                                                                                                      |  | Mélanie Albert, Marion Barbet, Sylvie Behillil, Méline Bizard, Angela Brisebarre, Flora Donati, Etienne Simon-Lorière, Vincent Enouf, Maud Vanpeene, Sylvie van der Werf, Raulin Olivia                                                                                                                                                                                                                                                                                       |
| EPI_ISL_418240                                                                                                                                                                                 | LABM GH nord Essonne                                                                                                                                                                                                          | National Reference Center for Viruses of Respiratory Infections, Institut Pasteur, Paris                                                                                                                                      |  | Mélanie Albert, Marion Barbet, Sylvie Behillil, Méline Bizard, Angela Brisebarre, Flora Donati, Etienne Simon-Lorière, Vincent Enouf, Maud Vanpeene, Sylvie van der Werf, Christine Lambert                                                                                                                                                                                                                                                                                   |
| EPI_ISL_418241, EPI_ISL_418242                                                                                                                                                                 | NIC Viral Respiratory Unit - Institut Pasteur of Algeria                                                                                                                                                                      | National Reference Center for Viruses of Respiratory Infections, Institut Pasteur, Paris                                                                                                                                      |  | Mélanie Albert, Marion Barbet, Sylvie Behillil, Méline Bizard, Angela Brisebarre, Flora Donati, Etienne Simon-Lorière, Vincent Enouf, Maud Vanpeene, Sylvie van der Werf, Fawzi Derraf                                                                                                                                                                                                                                                                                        |
| EPI_ISL_418243, EPI_ISL_418244                                                                                                                                                                 | HOSPITAL UNIVERSITARIO VIRGEN DE LAS NIEVES                                                                                                                                                                                   | Instituto de Salud Carlos III                                                                                                                                                                                                 |  | Iglesias-Caballero, M. Molinero Calamita, M. González-Esguevillas, M. Camarero, S. Pozo, F. Casas, I. Jiménez, P. Jiménez, M. Zaballos, A. Monzón, S. Varona, S. Juliá, M. Cuesta, I. Sanbonmatsu S.                                                                                                                                                                                                                                                                          |
| EPI_ISL_418245, EPI_ISL_418246                                                                                                                                                                 | Hospital General y Universitario de Guadalajara                                                                                                                                                                               | Instituto de Salud Carlos III                                                                                                                                                                                                 |  | Iglesias-Caballero, M. Molinero Calamita, M. González-Esguevillas, M. Camarero, S. Pozo, F. Casas, I. Jiménez, P. Jiménez, M. Zaballos, A. Monzón, S. Varona, S. Juliá, M. Cuesta, I. Gonzalez-Praetorius A.                                                                                                                                                                                                                                                                  |
| EPI_ISL_418247                                                                                                                                                                                 | HOSPITAL GENERAL DE SEGOVIA                                                                                                                                                                                                   | Instituto de Salud Carlos III                                                                                                                                                                                                 |  | Iglesias-Caballero, M. Molinero Calamita, M. González-Esguevillas, M. Camarero, S. Pozo, F. Casas, I. Jiménez, P. Jiménez, M. Zaballos, A. Monzón, S. Varona, S. Juliá, M. Cuesta, I. Hernando-Real S.                                                                                                                                                                                                                                                                        |
| EPI_ISL_418248, EPI_ISL_418249                                                                                                                                                                 | COMPLEJO ASISTENCIAL UNIVERSITARIO DE BURGOS                                                                                                                                                                                  | Instituto de Salud Carlos III                                                                                                                                                                                                 |  | Iglesias-Caballero, M. Molinero Calamita, M. González-Esguevillas, M. Camarero, S. Pozo, F. Casas, I. Jiménez, P. Jiménez, M. Zaballos, A. Monzón, S. Varona, S. Juliá, M. Cuesta, I. Megias-Lobon G.                                                                                                                                                                                                                                                                         |
| EPI_ISL_418250                                                                                                                                                                                 | HOSPITAL CLINIC                                                                                                                                                                                                               | Instituto de Salud Carlos III                                                                                                                                                                                                 |  | Iglesias-Caballero, M. Molinero Calamita, M. González-Esguevillas, M. Camarero, S. Pozo, F. Casas, I. Jiménez, P. Jiménez, M. Zaballos, A. Monzón, S. Varona, S. Juliá, M. Cuesta, I. Marcos M.A                                                                                                                                                                                                                                                                              |
| EPI_ISL_418251                                                                                                                                                                                 | HOSPITAL UNIVERSITARIO LA PAZ                                                                                                                                                                                                 | Instituto de Salud Carlos III                                                                                                                                                                                                 |  | Iglesias-Caballero, M. Molinero Calamita, M. González-Esguevillas, M. Camarero, S. Pozo, F. Casas, I. Jiménez, P. Jiménez, M. Zaballos, A. Monzón, S. Varona, S. Juliá, M. Cuesta, I. Romero P.                                                                                                                                                                                                                                                                               |
| EPI_ISL_418252                                                                                                                                                                                 | FUNDACION JIMENEZ DIAZ                                                                                                                                                                                                        | Instituto de Salud Carlos III                                                                                                                                                                                                 |  | Iglesias-Caballero, M. Molinero Calamita, M. González-Esguevillas, M. Camarero, S. Pozo, F. Casas, I. Jiménez, P. Jiménez, M. Zaballos, A. Monzón, S. Varona, S. Juliá, M. Cuesta, I. Fernández Roblas, R.                                                                                                                                                                                                                                                                    |
| EPI_ISL_418253                                                                                                                                                                                 | HOSPITAL TXAGORRITXU                                                                                                                                                                                                          | Instituto de Salud Carlos III                                                                                                                                                                                                 |  | Iglesias-Caballero, M. Molinero Calamita, M. González-Esguevillas, M. Camarero, S. Pozo, F. Casas, I. Jiménez, P. Jiménez, M. Zaballos, A. Monzón, S. Varona, S. Juliá, M. Cuesta, I. Gomez-Gonzalez C.                                                                                                                                                                                                                                                                       |
| EPI_ISL_418256                                                                                                                                                                                 | Ospedale "San Liberatore" di Atri                                                                                                                                                                                             | Istituto Zooprofilattico Sperimentale dell'Abruzzo e Molise "G. Caporale"                                                                                                                                                     |  | Lorusso A, Marcacci M, Di Domenico M, Puglia I, Curini V, Ancora M, Di Pasquale A, Rinaldi A, Mangone I, Cammà C, Savini G.                                                                                                                                                                                                                                                                                                                                                   |
| EPI_ISL_418257                                                                                                                                                                                 | Ospedale Civile Giuseppe Mazzini, Teramo                                                                                                                                                                                      | Istituto Zooprofilattico Sperimentale dell'Abruzzo e Molise "G. Caporale"                                                                                                                                                     |  | Lorusso A, Marcacci M, Di Domenico M, Puglia I, Curini V, Ancora M, Di Pasquale A, Rinaldi A, Mangone I, Cammà C, Savini G.                                                                                                                                                                                                                                                                                                                                                   |
| EPI_ISL_418262                                                                                                                                                                                 | Instituto Nacional de Salud                                                                                                                                                                                                   | Instituto Nacional de Salud Universidad Cooperativa de Colombia Instituto Alexander von Humboldt Imperial College-London London School of Hygiene & Tropical Medicine                                                         |  | Marcela Mercado-Reyes, Katherine Laiton-Donato, Diego A. Álvarez-Díaz, Carlos Franco-Muñoz, Jose A. Usme-Ciro, Gloria Puerto, Nicolás D. Franco-Sierra, Mailyn A. Gonzalez, Zulma M. Cucunubá, Christian Julian Villabona-Arenas, Liz Villabona-Arenas, Sussy Echeverría, Astrid C. Flórez, Sergio Gomez Rangel, Luz Dary Rodriguez, Juliana Barbosa, Erika Ospitia, Diana Marcela Walteros-Acero, Nuno Rodrigues Faria, Martha Lucia Ospina Martinez                         |
| EPI_ISL_418624, EPI_ISL_418633, EPI_ISL_418645, EPI_ISL_418646, EPI_ISL_418648, EPI_ISL_418649, EPI_ISL_418650, EPI_ISL_418651, EPI_ISL_418652, EPI_ISL_418659, EPI_ISL_418660, EPI_ISL_418664 | see above<br>Department of Clinical Microbiology                                                                                                                                                                              | GIGA Medical Genomics                                                                                                                                                                                                         |  | Keith Durkin, Maria Artesi, Sébastien Bontems, Raphaël Boreux, Cécile Meex, Pierrette Melin, Marie-Pierre Hayette, Vincent Bours.                                                                                                                                                                                                                                                                                                                                             |
| EPI_ISL_418800                                                                                                                                                                                 | KU Leuven, Clinical and Epidemiological Virology                                                                                                                                                                              | KU Leuven, Clinical and Epidemiological Virology                                                                                                                                                                              |  | Bert Vanmechelen, Joan Marti-Carreras, Tony Wawina, Piet Maes                                                                                                                                                                                                                                                                                                                                                                                                                 |
| EPI_ISL_418815                                                                                                                                                                                 | Department of Clinical Pathology, Pamela Youde Nethersole Eastern Hospital                                                                                                                                                    | Department of Health Technology and Informatics, Faculty of Health and Social Science, The Hong Kong Polytechnic University                                                                                                   |  | Kenneth Siu-Sing LEUNG, Timothy Ting-Leung NG, Alan Ka-Lun WU, Miranda Chong-Yee YAU, Hiu-Yin LAO, Ming-Pan CHOI, Kingsley King-Gee TAM, Lam-Kwong LEE, Barry Kin-Chung WONG, Alex Yat-Man HO, Kam-Tong YIP, Kwok-Cheung LUNG, Raymond Wai-To LIU, Eugene Yuk-Keung TSO, Wai-Shing LEUNG, Man-Chun CHAN, Yuk-Yung NG, Kit-Man SIN, Kitty Sau-Chun FUNG, Sandy Ka-Yee CHAU, Wing-Kin TO, Tak-Lun QUE, David Ho-Keung SHUM, Shea Ping YIP, Wing Cheong YAM, Gilman Kit-Hang Siu |
| EPI_ISL_418990, EPI_ISL_418991                                                                                                                                                                 | State Key Laboratory for Diagnosis and Treatment of Infectious Diseases, National Clinical Research Center for Infectious Diseases, First Affiliated Hospital, Zhejiang University School of Medicine, Hangzhou, China 310003 | State Key Laboratory for Diagnosis and Treatment of Infectious Diseases, National Clinical Research Center for Infectious Diseases, First Affiliated Hospital, Zhejiang University School of Medicine, Hangzhou, China 310003 |  | Hangping Yao, Nanping Wu, Chao Jiang, Xiangyun Lu, Linfang Cheng, Fumin Liu, Zhigang Wu, Haibo Wu, Changzhong Jin, Min Zheng, Lanjuan Li                                                                                                                                                                                                                                                                                                                                      |
| EPI_ISL_419214, EPI_ISL_419215, EPI_ISL_419216                                                                                                                                                 | Department of Clinical Pathology, Pamela Youde Nethersole Eastern Hospital                                                                                                                                                    | Department of Health Technology and Informatics, Faculty of Health and Social Science, The Hong Kong Polytechnic University                                                                                                   |  | Kenneth Siu-Sing LEUNG, Timothy Ting-Leung NG, Alan Ka-Lun WU, Miranda Chong-Yee YAU, Hiu-Yin LAO, Ming-Pan CHOI, Kingsley King-Gee TAM, Lam-Kwong LEE, Barry Kin-Chung WONG, Alex Yat-Man HO, Kam-Tong YIP, Kwok-Cheung LUNG, Raymond Wai-To LIU, Eugene Yuk-Keung TSO, Wai-Shing LEUNG, Man-Chun CHAN, Yuk-Yung NG, Kit-Man SIN, Kitty Sau-Chun FUNG, Sandy Ka-Yee CHAU, Wing-Kin TO, Tak-Lun QUE, David Ho-Keung SHUM, Shea Ping YIP, Wing Cheong YAM, Gilman Kit-Hang Siu |
| EPI_ISL_419217                                                                                                                                                                                 | Department of Pathology, Princess Margaret Hospital                                                                                                                                                                           | Department of Health Technology and Informatics, Faculty of Health and Social Science, The Hong Kong Polytechnic University                                                                                                   |  | Kenneth Siu-Sing LEUNG, Timothy Ting-Leung NG, Alan Ka-Lun WU, Miranda Chong-Yee YAU, Hiu-Yin LAO, Ming-Pan CHOI, Kingsley King-Gee TAM, Lam-Kwong LEE, Barry Kin-Chung WONG, Alex Yat-Man HO, Kam-Tong YIP, Kwok-Cheung LUNG, Raymond Wai-To LIU, Eugene Yuk-Keung TSO, Wai-Shing LEUNG, Man-Chun CHAN, Yuk-Yung NG, Kit-Man SIN, Kitty Sau-Chun FUNG, Sandy Ka-Yee CHAU, Wing-Kin TO, Tak-Lun QUE, David Ho-Keung SHUM, Shea Ping YIP, Wing Cheong YAM, Gilman Kit-Hang Siu |
| EPI_ISL_419219                                                                                                                                                                                 | Department of Clinical Pathology, Pamela Youde Nethersole Eastern Hospital                                                                                                                                                    | Department of Health Technology and Informatics, Faculty of Health and Social Science, The Hong Kong Polytechnic University                                                                                                   |  | Kenneth Siu-Sing LEUNG, Timothy Ting-Leung NG, Alan Ka-Lun WU, Miranda Chong-Yee YAU, Hiu-Yin LAO, Ming-Pan CHOI, Kingsley King-Gee TAM, Lam-Kwong LEE, Barry Kin-Chung WONG, Alex Yat-Man HO, Kam-Tong YIP, Kwok-Cheung LUNG, Raymond Wai-To LIU, Eugene Yuk-Keung TSO, Wai-Shing LEUNG, Man-Chun CHAN, Yuk-Yung NG, Kit-Man SIN, Kitty Sau-Chun FUNG, Sandy Ka-Yee CHAU, Wing-Kin TO, Tak-Lun QUE, David Ho-Keung SHUM, Shea Ping YIP, Wing Cheong YAM, Gilman Kit-Hang Siu |
| EPI_ISL_419221                                                                                                                                                                                 | Department of Pathology, United Christian Hospital                                                                                                                                                                            | Department of Health Technology and Informatics, Faculty of Health and Social Science, The Hong Kong Polytechnic University                                                                                                   |  | Kenneth Siu-Sing LEUNG, Timothy Ting-Leung NG, Alan Ka-Lun WU, Miranda Chong-Yee YAU, Hiu-Yin LAO, Ming-Pan CHOI, Kingsley King-Gee TAM, Lam-Kwong LEE, Barry Kin-Chung WONG, Alex Yat-Man HO, Kam-Tong YIP, Kwok-Cheung LUNG, Raymond Wai-To LIU, Eugene Yuk-Keung TSO, Wai-Shing LEUNG, Man-Chun CHAN, Yuk-Yung NG, Kit-Man SIN, Kitty Sau-Chun FUNG, Sandy Ka-Yee CHAU, Wing-Kin TO, Tak-Lun QUE, David Ho-Keung SHUM, Shea Ping YIP, Wing Cheong YAM, Gilman Kit-Hang Siu |

|                                                                                                                                                                                                                                                |                                                                                               |                                                                                                                             |                                                                                                                                                                                                                                                                                                                                                                                                                                                                               |
|------------------------------------------------------------------------------------------------------------------------------------------------------------------------------------------------------------------------------------------------|-----------------------------------------------------------------------------------------------|-----------------------------------------------------------------------------------------------------------------------------|-------------------------------------------------------------------------------------------------------------------------------------------------------------------------------------------------------------------------------------------------------------------------------------------------------------------------------------------------------------------------------------------------------------------------------------------------------------------------------|
| EPI_ISL_419222                                                                                                                                                                                                                                 | Department of Pathology, Princess Margaret Hospital                                           | Department of Health Technology and Informatics, Faculty of Health and Social Science, The Hong Kong Polytechnic University | Kenneth Siu-Sing LEUNG, Timothy Ting-Leung NG, Alan Ka-Lun WU, Miranda Chong-Yee YAU, Hiu-Yin LAO, Ming-Pan CHOI, Kingsley King-Gee TAM, Lam-Kwong LEE, Barry Kin-Chung WONG, Alex Yat-Man HO, Kam-Tong YIP, Kwok-Cheung LUNG, Raymond Wai-To LIU, Eugene Yuk-Keung TSO, Wai-Shing LEUNG, Man-Chun CHAN, Yuk-Yung NG, Kit-Man SIN, Kitty Sau-Chun FUNG, Sandy Ka-Yee CHAU, Wing-Kin TO, Tak-Lun QUE, David Ho-Keung SHUM, Shea Ping YIP, Wing Cheong YAM, Gilman Kit-Hang SIU |
| EPI_ISL_419224, EPI_ISL_419225, EPI_ISL_419226, EPI_ISL_419227, EPI_ISL_419228, EPI_ISL_419229                                                                                                                                                 | Department of Clinical Pathology, Pamela Youde Nethersole Eastern Hospital                    | Department of Health Technology and Informatics, Faculty of Health and Social Science, The Hong Kong Polytechnic University | Kenneth Siu-Sing LEUNG, Timothy Ting-Leung NG, Alan Ka-Lun WU, Miranda Chong-Yee YAU, Hiu-Yin LAO, Ming-Pan CHOI, Kingsley King-Gee TAM, Lam-Kwong LEE, Barry Kin-Chung WONG, Alex Yat-Man HO, Kam-Tong YIP, Kwok-Cheung LUNG, Raymond Wai-To LIU, Eugene Yuk-Keung TSO, Wai-Shing LEUNG, Man-Chun CHAN, Yuk-Yung NG, Kit-Man SIN, Kitty Sau-Chun FUNG, Sandy Ka-Yee CHAU, Wing-Kin TO, Tak-Lun QUE, David Ho-Keung SHUM, Shea Ping YIP, Wing Cheong YAM, Gilman Kit-Hang SIU |
| EPI_ISL_419230                                                                                                                                                                                                                                 | Hospital Universitario Virgen de las Nieves                                                   | Instituto de Salud Carlos III                                                                                               | Iglesias-Caballero, M.; Molinero Calamita, M.; González-Esguevillas, M.; Camarero, S.; Pozo, F.; Casas, I.; Jiménez, P.; Jiménez, M.; Zaballos, A.; Monzón, S.; Varona, S.; Juliá, M.; Cuesta, I.; Sanbonmatsu, S.                                                                                                                                                                                                                                                            |
| EPI_ISL_419231                                                                                                                                                                                                                                 | Department of Clinical Pathology, Tuen Mun Hospital, 23 Tsing Chung Koon Road, Tuen Mun, N.T. | Department of Health Technology and Informatics, Faculty of Health and Social Science, The Hong Kong Polytechnic University | Kenneth Siu-Sing LEUNG, Timothy Ting-Leung NG, Alan Ka-Lun WU, Miranda Chong-Yee YAU, Hiu-Yin LAO, Ming-Pan CHOI, Kingsley King-Gee TAM, Lam-Kwong LEE, Barry Kin-Chung WONG, Alex Yat-Man HO, Kam-Tong YIP, Kwok-Cheung LUNG, Raymond Wai-To LIU, Eugene Yuk-Keung TSO, Wai-Shing LEUNG, Man-Chun CHAN, Yuk-Yung NG, Kit-Man SIN, Kitty Sau-Chun FUNG, Sandy Ka-Yee CHAU, Wing-Kin TO, Tak-Lun QUE, David Ho-Keung SHUM, Shea Ping YIP, Wing Cheong YAM, Gilman Kit-Hang SIU |
| EPI_ISL_419232                                                                                                                                                                                                                                 | Department of Clinical Pathology, Pamela Youde Nethersole Eastern Hospital                    | Department of Health Technology and Informatics, Faculty of Health and Social Science, The Hong Kong Polytechnic University | Kenneth Siu-Sing LEUNG, Timothy Ting-Leung NG, Alan Ka-Lun WU, Miranda Chong-Yee YAU, Hiu-Yin LAO, Ming-Pan CHOI, Kingsley King-Gee TAM, Lam-Kwong LEE, Barry Kin-Chung WONG, Alex Yat-Man HO, Kam-Tong YIP, Kwok-Cheung LUNG, Raymond Wai-To LIU, Eugene Yuk-Keung TSO, Wai-Shing LEUNG, Man-Chun CHAN, Yuk-Yung NG, Kit-Man SIN, Kitty Sau-Chun FUNG, Sandy Ka-Yee CHAU, Wing-Kin TO, Tak-Lun QUE, David Ho-Keung SHUM, Shea Ping YIP, Wing Cheong YAM, Gilman Kit-Hang SIU |
| EPI_ISL_419233                                                                                                                                                                                                                                 | Hospital Universitario de Canarias                                                            | Instituto de Salud Carlos III                                                                                               | Iglesias-Caballero, M.; Molinero Calamita, M.; González-Esguevillas, M.; Camarero, S.; Pozo, F.; Casas, I.; Jiménez, P.; Jiménez, M.; Zaballos, A.; Monzón, S.; Varona, S.; Juliá, M.; Cuesta, I.; Castro, B.                                                                                                                                                                                                                                                                 |
| EPI_ISL_419234                                                                                                                                                                                                                                 | Hospital San Pedro                                                                            | Instituto de Salud Carlos III                                                                                               | Iglesias-Caballero, M.; Molinero Calamita, M.; González-Esguevillas, M.; Camarero, S.; Pozo, F.; Casas, I.; Jiménez, P.; Jiménez, M.; Zaballos, A.; Monzón, S.; Varona, S.; Juliá, M.; Cuesta, I.; Alonso, C.                                                                                                                                                                                                                                                                 |
| EPI_ISL_419235, EPI_ISL_419236, EPI_ISL_419237                                                                                                                                                                                                 | Fundacion Jimenez Diaz                                                                        | Instituto de Salud Carlos III                                                                                               | Iglesias-Caballero, M.; Molinero Calamita, M.; González-Esguevillas, M.; Camarero, S.; Pozo, F.; Casas, I.; Jiménez, P.; Jiménez, M.; Zaballos, A.; Monzón, S.; Varona, S.; Juliá, M.; Cuesta, I.; Fernández, R.                                                                                                                                                                                                                                                              |
| EPI_ISL_419238                                                                                                                                                                                                                                 | HOSPITAL DE CRUCES.                                                                           | Instituto de Salud Carlos III                                                                                               | Iglesias-Caballero, M. Molinero Calamita, M. González-Esguevillas, M. Camarero, S. Pozo, F. Casas, I. Jiménez, P. Jiménez, M. Zaballos, A. Monzón, S. Varona, S. Juliá, M. Cuesta, I. Aranzamendi, M.                                                                                                                                                                                                                                                                         |
| EPI_ISL_419240                                                                                                                                                                                                                                 | HOSPITAL TXAGORRITXU                                                                          | Instituto de Salud Carlos III                                                                                               | Iglesias-Caballero, M. Molinero Calamita, M. González-Esguevillas, M. Camarero, S. Pozo, F. Casas, I. Jiménez, P. Jiménez, M. Zaballos, A. Monzón, S. Varona, S. Juliá, M. Cuesta, I. Gómez, C.                                                                                                                                                                                                                                                                               |
| EPI_ISL_419245, EPI_ISL_419247, EPI_ISL_419250, EPI_ISL_419252                                                                                                                                                                                 | Department of Clinical Pathology, Pamela Youde Nethersole Eastern Hospital                    | Department of Health Technology and Informatics, Faculty of Health and Social Science, The Hong Kong Polytechnic University | Kenneth Siu-Sing LEUNG, Timothy Ting-Leung NG, Alan Ka-Lun WU, Miranda Chong-Yee YAU, Hiu-Yin LAO, Ming-Pan CHOI, Kingsley King-Gee TAM, Lam-Kwong LEE, Barry Kin-Chung WONG, Alex Yat-Man HO, Kam-Tong YIP, Kwok-Cheung LUNG, Raymond Wai-To LIU, Eugene Yuk-Keung TSO, Wai-Shing LEUNG, Man-Chun CHAN, Yuk-Yung NG, Kit-Man SIN, Kitty Sau-Chun FUNG, Sandy Ka-Yee CHAU, Wing-Kin TO, Tak-Lun QUE, David Ho-Keung SHUM, Shea Ping YIP, Wing Cheong YAM, Gilman Kit-Hang SIU |
| EPI_ISL_419296                                                                                                                                                                                                                                 | Kochi Prefectural Institute of Public Health                                                  | Pathogen Genomics Center, National Institute of Infectious Diseases                                                         | Tsuyoshi Sekizuka, Akihiko Tokaji, Kentaro Itokawa, Rina Tanaka, Masanori Hashino, Hajime Kamiya, Motoi Suzuki, Makoto Kuroda                                                                                                                                                                                                                                                                                                                                                 |
| EPI_ISL_419297, EPI_ISL_419298                                                                                                                                                                                                                 | Chiba Prefectural Institute of Public Health                                                  | Pathogen Genomics Center, National Institute of Infectious Diseases                                                         | Tsuyoshi Sekizuka, Masakatsu Taira, Yushi Hachisu, Kentaro Itokawa, Rina Tanaka, Masanori Hashino, Hajime Kamiya, Motoi Suzuki, Makoto Kuroda                                                                                                                                                                                                                                                                                                                                 |
| EPI_ISL_419299, EPI_ISL_419300                                                                                                                                                                                                                 | Ishikawa Prefectural Institute of Public Health and Environmental Science                     | Pathogen Genomics Center, National Institute of Infectious Diseases                                                         | Tsuyoshi Sekizuka, Sanae Kuramoto, Eri Nariai, Kentaro Itokawa, Rina Tanaka, Masanori Hashino, Hajime Kamiya, Motoi Suzuki, Makoto Kuroda                                                                                                                                                                                                                                                                                                                                     |
| EPI_ISL_419301, EPI_ISL_419302, EPI_ISL_419303, EPI_ISL_419304, EPI_ISL_419305, EPI_ISL_419306, EPI_ISL_419307, EPI_ISL_419308                                                                                                                 | Saitama Prefectural Institute of Public Health                                                | Pathogen Genomics Center, National Institute of Infectious Diseases                                                         | Tsuyoshi Sekizuka, Michiyo Shinohara, Tsuyoshi Kishimoto, Kentaro Itokawa, Rina Tanaka, Masanori Hashino, Hajime Kamiya, Motoi Suzuki, Makoto Kuroda                                                                                                                                                                                                                                                                                                                          |
| EPI_ISL_419309, EPI_ISL_419310, EPI_ISL_419311                                                                                                                                                                                                 | Chiba Prefectural Institute of Public Health                                                  | Pathogen Genomics Center, National Institute of Infectious Diseases                                                         | Tsuyoshi Sekizuka, Masakatsu Taira, Yushi Hachisu, Kentaro Itokawa, Rina Tanaka, Masanori Hashino, Hajime Kamiya, Motoi Suzuki, Makoto Kuroda                                                                                                                                                                                                                                                                                                                                 |
| EPI_ISL_419662, EPI_ISL_419664                                                                                                                                                                                                                 | Center for Virology, Medical University of Vienna                                             | Bergthaler laboratory, CeMM Research Center for Molecular Medicine of the Austrian Academy of Sciences                      | Alexandra Popa, Benedikt Agerer, Henrique Colaco, Lukas Endler, Jakob-Wendelin Genger, Alexander Lercher, Mark Smyth, Thomas Penz, Michael Schuster, Judith Aberle, Stephan Aberle, Elisabeth Puchhammer-Stöckl, Christoph Bock, Andreas Bergthaler                                                                                                                                                                                                                           |
| EPI_ISL_419707                                                                                                                                                                                                                                 | HOSPITAL CLINIC                                                                               | Instituto de Salud Carlos III                                                                                               | Iglesias-Caballero, M. Molinero Calamita, M. González-Esguevillas, M. Camarero S. Pozo F. Casas I. Jiménez, P. Jiménez, M. Zaballos, A. Monzón, S. Varona, S. Juliá, M. Cuesta, I. Marcos, M.A                                                                                                                                                                                                                                                                                |
| EPI_ISL_419709                                                                                                                                                                                                                                 | HOSPITAL TXAGORRITXU                                                                          | Instituto de Salud Carlos III                                                                                               | Iglesias-Caballero, M. Molinero Calamita, M. González-Esguevillas, M. Camarero S. Pozo F. Casas I. Jiménez, P. Jiménez, M. Zaballos, A. Monzón, S. Varona, S. Juliá, M. Cuesta, I. Gómez, C.                                                                                                                                                                                                                                                                                  |
| EPI_ISL_420037                                                                                                                                                                                                                                 | NIC Viral Respiratory Unit - Institut Pasteur of Algeria                                      | National Reference Center for Viruses of Respiratory Infections, Institut Pasteur, Paris                                    | Mélanie Albert, Marion Barbet, Sylvie Behillil, Méline Bizard, Angela Brisebarre, Flora Donati, Etienne Simon-Lorière, Vincent Enouf, Maud Vanpeene, Sylvie van der Werf, Fawzi Derrar                                                                                                                                                                                                                                                                                        |
| EPI_ISL_420038                                                                                                                                                                                                                                 | Sentinelles network                                                                           | National Reference Center for Viruses of Respiratory Infections, Institut Pasteur, Paris                                    | Mélanie Albert, Marion Barbet, Sylvie Behillil, Méline Bizard, Angela Brisebarre, Flora Donati, Etienne Simon-Lorière, Vincent Enouf, Maud Vanpeene, Sylvie van der Werf                                                                                                                                                                                                                                                                                                      |
| EPI_ISL_420039, EPI_ISL_420040                                                                                                                                                                                                                 | L'Air du Temps                                                                                | National Reference Center for Viruses of Respiratory Infections, Institut Pasteur, Paris                                    | Mélanie Albert, Marion Barbet, Sylvie Behillil, Méline Bizard, Angela Brisebarre, Flora Donati, Etienne Simon-Lorière, Vincent Enouf, Maud Vanpeene, Sylvie van der Werf                                                                                                                                                                                                                                                                                                      |
| EPI_ISL_420041                                                                                                                                                                                                                                 | CH Compiègne Laboratoire de Biologie                                                          | National Reference Center for Viruses of Respiratory Infections, Institut Pasteur, Paris                                    | Mélanie Albert, Marion Barbet, Sylvie Behillil, Méline Bizard, Angela Brisebarre, Flora Donati, Etienne Simon-Lorière, Vincent Enouf, Maud Vanpeene, Sylvie van der Werf, Raulin Olivia                                                                                                                                                                                                                                                                                       |
| EPI_ISL_420042                                                                                                                                                                                                                                 | Service de Biologie clinique                                                                  | National Reference Center for Viruses of Respiratory Infections, Institut Pasteur, Paris                                    | Mélanie Albert, Marion Barbet, Sylvie Behillil, Méline Bizard, Angela Brisebarre, Flora Donati, Etienne Simon-Lorière, Vincent Enouf, Maud Vanpeene, Sylvie van der Werf                                                                                                                                                                                                                                                                                                      |
| EPI_ISL_420043                                                                                                                                                                                                                                 | CMIP                                                                                          | National Reference Center for Viruses of Respiratory Infections, Institut Pasteur, Paris                                    | Mélanie Albert, Marion Barbet, Sylvie Behillil, Méline Bizard, Angela Brisebarre, Flora Donati, Etienne Simon-Lorière, Vincent Enouf, Maud Vanpeene, Sylvie van der Werf                                                                                                                                                                                                                                                                                                      |
| EPI_ISL_420044                                                                                                                                                                                                                                 | CH Jean de Navarre Laboratoire de Biologie                                                    | National Reference Center for Viruses of Respiratory Infections, Institut Pasteur, Paris                                    | Mélanie Albert, Marion Barbet, Sylvie Behillil, Méline Bizard, Angela Brisebarre, Flora Donati, Etienne Simon-Lorière, Vincent Enouf, Maud Vanpeene, Sylvie van der Werf                                                                                                                                                                                                                                                                                                      |
| EPI_ISL_420045                                                                                                                                                                                                                                 | Sentinelles network                                                                           | National Reference Center for Viruses of Respiratory Infections, Institut Pasteur, Paris                                    | Mélanie Albert, Marion Barbet, Sylvie Behillil, Méline Bizard, Angela Brisebarre, Flora Donati, Etienne Simon-Lorière, Vincent Enouf, Maud Vanpeene, Sylvie van der Werf                                                                                                                                                                                                                                                                                                      |
| EPI_ISL_420046, EPI_ISL_420047                                                                                                                                                                                                                 | Résidence Villa Caroline                                                                      | National Reference Center for Viruses of Respiratory Infections, Institut Pasteur, Paris                                    | Mélanie Albert, Marion Barbet, Sylvie Behillil, Méline Bizard, Angela Brisebarre, Flora Donati, Etienne Simon-Lorière, Vincent Enouf, Maud Vanpeene, Sylvie van der Werf                                                                                                                                                                                                                                                                                                      |
| EPI_ISL_420048                                                                                                                                                                                                                                 | Service de Biologie Médicale - BP 125                                                         | National Reference Center for Viruses of Respiratory Infections, Institut Pasteur, Paris                                    | Mélanie Albert, Marion Barbet, Sylvie Behillil, Méline Bizard, Angela Brisebarre, Flora Donati, Etienne Simon-Lorière, Vincent Enouf, Maud Vanpeene, Sylvie van der Werf, Christine Lambert                                                                                                                                                                                                                                                                                   |
| EPI_ISL_420049, EPI_ISL_420050                                                                                                                                                                                                                 | CH Compiègne Laboratoire de Biologie                                                          | National Reference Center for Viruses of Respiratory Infections, Institut Pasteur, Paris                                    | Mélanie Albert, Marion Barbet, Sylvie Behillil, Méline Bizard, Angela Brisebarre, Flora Donati, Etienne Simon-Lorière, Vincent Enouf, Maud Vanpeene, Sylvie van der Werf, Raulin Olivia                                                                                                                                                                                                                                                                                       |
| EPI_ISL_420051                                                                                                                                                                                                                                 | Résidence Eleusis                                                                             | National Reference Center for Viruses of Respiratory Infections, Institut Pasteur, Paris                                    | Mélanie Albert, Marion Barbet, Sylvie Behillil, Méline Bizard, Angela Brisebarre, Flora Donati, Etienne Simon-Lorière, Vincent Enouf, Maud Vanpeene, Sylvie van der Werf                                                                                                                                                                                                                                                                                                      |
| EPI_ISL_420052                                                                                                                                                                                                                                 | Résidence les Marines                                                                         | National Reference Center for Viruses of Respiratory Infections, Institut Pasteur, Paris                                    | Mélanie Albert, Marion Barbet, Sylvie Behillil, Méline Bizard, Angela Brisebarre, Flora Donati, Etienne Simon-Lorière, Vincent Enouf, Maud Vanpeene, Sylvie van der Werf                                                                                                                                                                                                                                                                                                      |
| EPI_ISL_420053                                                                                                                                                                                                                                 | CH Jean de Navarre Laboratoire de Biologie                                                    | National Reference Center for Viruses of Respiratory Infections, Institut Pasteur, Paris                                    | Mélanie Albert, Marion Barbet, Sylvie Behillil, Méline Bizard, Angela Brisebarre, Flora Donati, Etienne Simon-Lorière, Vincent Enouf, Maud Vanpeene, Sylvie van der Werf                                                                                                                                                                                                                                                                                                      |
| EPI_ISL_420055                                                                                                                                                                                                                                 | Sentinelles network                                                                           | National Reference Center for Viruses of Respiratory Infections, Institut Pasteur, Paris                                    | Mélanie Albert, Marion Barbet, Sylvie Behillil, Méline Bizard, Angela Brisebarre, Flora Donati, Etienne Simon-Lorière, Vincent Enouf, Maud Vanpeene, Sylvie van der Werf                                                                                                                                                                                                                                                                                                      |
| EPI_ISL_420056, EPI_ISL_420057                                                                                                                                                                                                                 | CH Compiègne Laboratoire de Biologie                                                          | National Reference Center for Viruses of Respiratory Infections, Institut Pasteur, Paris                                    | Mélanie Albert, Marion Barbet, Sylvie Behillil, Méline Bizard, Angela Brisebarre, Flora Donati, Etienne Simon-Lorière, Vincent Enouf, Maud Vanpeene, Sylvie van der Werf, Raulin Olivia                                                                                                                                                                                                                                                                                       |
| EPI_ISL_420058, EPI_ISL_420059, EPI_ISL_420060                                                                                                                                                                                                 | Service de Biologie Médicale - BP 125                                                         | National Reference Center for Viruses of Respiratory Infections, Institut Pasteur, Paris                                    | Mélanie Albert, Marion Barbet, Sylvie Behillil, Méline Bizard, Angela Brisebarre, Flora Donati, Etienne Simon-Lorière, Vincent Enouf, Maud Vanpeene, Sylvie van der Werf, Christine Lambert                                                                                                                                                                                                                                                                                   |
| EPI_ISL_420061                                                                                                                                                                                                                                 | CMIP                                                                                          | National Reference Center for Viruses of Respiratory Infections, Institut Pasteur, Paris                                    | Mélanie Albert, Marion Barbet, Sylvie Behillil, Méline Bizard, Angela Brisebarre, Flora Donati, Etienne Simon-Lorière, Vincent Enouf, Maud Vanpeene, Sylvie van der Werf                                                                                                                                                                                                                                                                                                      |
| EPI_ISL_420063                                                                                                                                                                                                                                 | Labo BM - Site de Juvisy - Hôpital Général                                                    | National Reference Center for Viruses of Respiratory Infections, Institut Pasteur, Paris                                    | Mélanie Albert, Marion Barbet, Sylvie Behillil, Méline Bizard, Angela Brisebarre, Flora Donati, Etienne Simon-Lorière, Vincent Enouf, Maud Vanpeene, Sylvie van der Werf                                                                                                                                                                                                                                                                                                      |
| EPI_ISL_420064                                                                                                                                                                                                                                 | Service de Biologie Médicale - BP 125                                                         | National Reference Center for Viruses of Respiratory Infections, Institut Pasteur, Paris                                    | Mélanie Albert, Marion Barbet, Sylvie Behillil, Méline Bizard, Angela Brisebarre, Flora Donati, Etienne Simon-Lorière, Vincent Enouf, Maud Vanpeene, Sylvie van der Werf, Christine Lambert                                                                                                                                                                                                                                                                                   |
| EPI_ISL_420069, EPI_ISL_420070                                                                                                                                                                                                                 | Institut Pasteur Dakar                                                                        | Institut Pasteur de Dakar                                                                                                   | Ndongo Dia, Moussa Moïse Diagne, Mamadou Diop, Ousmane Faye, Amadou Alpha Sall                                                                                                                                                                                                                                                                                                                                                                                                |
| EPI_ISL_420072, EPI_ISL_420073, EPI_ISL_420074                                                                                                                                                                                                 | Institut Pasteur Dakar                                                                        | Institut Pasteur de Dakar                                                                                                   | Ndongo Dia, Moussa Moïse Diagne, Mamadou Diop, Ousmane Faye, Amadou Alpha Sall                                                                                                                                                                                                                                                                                                                                                                                                |
| EPI_ISL_420076                                                                                                                                                                                                                                 | Institut Pasteur Dakar                                                                        | Institut Pasteur de Dakar                                                                                                   | Ndongo Dia, Moussa Moïse Diagne, Mamadou Diop, Ousmane Faye, Amadou Alpha Sall                                                                                                                                                                                                                                                                                                                                                                                                |
| EPI_ISL_420077, EPI_ISL_420078                                                                                                                                                                                                                 | Institut Pasteur Dakar                                                                        | Institut Pasteur de Dakar                                                                                                   | Ndongo Dia, Moussa Moïse Diagne, Mamadou Diop, Ousmane Faye, Amadou Alpha Sall                                                                                                                                                                                                                                                                                                                                                                                                |
| EPI_ISL_420080                                                                                                                                                                                                                                 | WHO National Influenza Centre Russian Federation                                              | WHO National Influenza Centre Russian Federation                                                                            | Andrey Komissarov, Artem Fadeev, Anna Ivanova, Daria Danilenko                                                                                                                                                                                                                                                                                                                                                                                                                |
| EPI_ISL_420081                                                                                                                                                                                                                                 | WHO National Influenza Centre Russian Federation                                              | WHO National Influenza Centre Russian Federation                                                                            | Andrey Komissarov, Artem Fadeev, Mariia Sergeeva, Anna Ivanova, Daria Danilenko                                                                                                                                                                                                                                                                                                                                                                                               |
| EPI_ISL_420093                                                                                                                                                                                                                                 | Wildlife Conservation Society, Bronx Zoo                                                      | Diagnostic Virology Laboratory, United States Department of Agriculture, National Veterinary Services Laboratories          | Patrick K. Mitchell, Renee R. Anderson, Brittany Chilson, Roopa Venugopalan, D. G. Diel, Laura B. Goodman, L. Wang, F. Yuan, Y. Fang, Mary Lea Killian, Kerrie Franzen, Nichole Hines Bergeson, Ivan Kuzmin, Melinda Jenkins-Moore, Tod P. Stuber                                                                                                                                                                                                                             |
| EPI_ISL_421182, EPI_ISL_421183, EPI_ISL_421184, EPI_ISL_421185, EPI_ISL_421186, EPI_ISL_421187, EPI_ISL_421188, EPI_ISL_421189, EPI_ISL_421190, EPI_ISL_421191, EPI_ISL_421192, EPI_ISL_421193, EPI_ISL_421194, EPI_ISL_421195, EPI_ISL_421196 | see above                                                                                     | Department of Clinical Microbiology                                                                                         | GIGA Medical Genomics                                                                                                                                                                                                                                                                                                                                                                                                                                                         |
| EPI_ISL_421221, EPI_ISL_421222, EPI_ISL_421224, EPI_ISL_421225, EPI_ISL_421226, EPI_ISL_421227, EPI_ISL_421228, EPI_ISL_421229, EPI_ISL_421230, EPI_ISL_421231, EPI_ISL_421232, EPI_ISL_421233, EPI_ISL_421234, EPI_ISL_421235, EPI_ISL_421236 | see above                                                                                     | Hangzhou Center for Diseases Control and Prevention                                                                         | Hangzhou Center for Diseases Control and Prevention                                                                                                                                                                                                                                                                                                                                                                                                                           |
| EPI_ISL_421275                                                                                                                                                                                                                                 | Russian State Collection of Viruses                                                           | Pathogenic Microorganisms Variability Laboratory                                                                            | Jun Li, Haoqiu Wang, Lingfeng Mao, Hua Yu, Xinfen Yu, Zhou Sun, Xin Qian, Shuchang Chen, Junfang Chen, Xuchu Wang                                                                                                                                                                                                                                                                                                                                                             |
| EPI_ISL_421500                                                                                                                                                                                                                                 | CH Compiègne Laboratoire de Biologie                                                          | National Reference Center for Viruses of Respiratory Infections, Institut Pasteur, Paris                                    | Mélanie Albert, Marion Barbet, Sylvie Behillil, Méline Bizard, Angela Brisebarre, Flora Donati, Etienne Simon-Lorière, Vincent Enouf, Maud Vanpeene, Sylvie van der Werf, Raulin Olivia                                                                                                                                                                                                                                                                                       |
| EPI_ISL_421501                                                                                                                                                                                                                                 | Service de Biologie Médicale - BP 125                                                         | National Reference Center for Viruses of Respiratory Infections, Institut Pasteur, Paris                                    | Mélanie Albert, Marion Barbet, Sylvie Behillil, Méline Bizard, Angela Brisebarre, Flora Donati, Etienne Simon-Lorière, Vincent Enouf, Maud Vanpeene, Sylvie van der Werf, Christine Lambert                                                                                                                                                                                                                                                                                   |
| EPI_ISL_421502, EPI_ISL_421503                                                                                                                                                                                                                 | Parc des Dames                                                                                | National Reference Center for Viruses of Respiratory Infections, Institut Pasteur, Paris                                    | Mélanie Albert, Marion Barbet, Sylvie Behillil, Méline Bizard, Angela Brisebarre, Flora Donati, Etienne Simon-Lorière, Vincent Enouf, Maud Vanpeene, Sylvie van der Werf                                                                                                                                                                                                                                                                                                      |
| EPI_ISL_421504, EPI_ISL_421505,                                                                                                                                                                                                                | Service de Biologie Médicale - BP 125                                                         | National Reference Center for Viruses of Respiratory Infections, Institut Pasteur, Paris                                    | Mélanie Albert, Marion Barbet, Sylvie Behillil, Méline Bizard, Angela Brisebarre, Flora Donati, Etienne Simon-Lorière, Vincent Enouf, Maud Vanpeene, Sylvie van der Werf, Christine Lambert                                                                                                                                                                                                                                                                                   |

|                                                                                                                                                                                                                                                                                                                                                                                                                                                                                                                                                                                                                |                                                                                                                                          |                                                                                                                                                                      |                                                                                                                                                                                                                                                                                                                                                                                                                                                                                                                                                                                                                                                                                                                                                                                     |  |
|----------------------------------------------------------------------------------------------------------------------------------------------------------------------------------------------------------------------------------------------------------------------------------------------------------------------------------------------------------------------------------------------------------------------------------------------------------------------------------------------------------------------------------------------------------------------------------------------------------------|------------------------------------------------------------------------------------------------------------------------------------------|----------------------------------------------------------------------------------------------------------------------------------------------------------------------|-------------------------------------------------------------------------------------------------------------------------------------------------------------------------------------------------------------------------------------------------------------------------------------------------------------------------------------------------------------------------------------------------------------------------------------------------------------------------------------------------------------------------------------------------------------------------------------------------------------------------------------------------------------------------------------------------------------------------------------------------------------------------------------|--|
| EPI_ISL_421506                                                                                                                                                                                                                                                                                                                                                                                                                                                                                                                                                                                                 |                                                                                                                                          |                                                                                                                                                                      | Lambert                                                                                                                                                                                                                                                                                                                                                                                                                                                                                                                                                                                                                                                                                                                                                                             |  |
| EPI_ISL_421507, EPI_ISL_421508                                                                                                                                                                                                                                                                                                                                                                                                                                                                                                                                                                                 | Le Château de Seine-Port                                                                                                                 | National Reference Center for Viruses of Respiratory Infections, Institut Pasteur, Paris                                                                             | Mélanie Albert, Marion Barbet, Sylvie Behillil, Méline Bizard, Angela Brisebarre, Flora Donati, Etienne Simon-Lorière, Vincent Enouf, Maud Vanpeene, Sylvie van der Werf                                                                                                                                                                                                                                                                                                                                                                                                                                                                                                                                                                                                            |  |
| EPI_ISL_421509, EPI_ISL_421510, EPI_ISL_421511                                                                                                                                                                                                                                                                                                                                                                                                                                                                                                                                                                 | CH Compiègne Laboratoire de Biologie                                                                                                     | National Reference Center for Viruses of Respiratory Infections, Institut Pasteur, Paris                                                                             | Mélanie Albert, Marion Barbet, Sylvie Behillil, Méline Bizard, Angela Brisebarre, Flora Donati, Etienne Simon-Lorière, Vincent Enouf, Maud Vanpeene, Sylvie van der Werf, Raulin Olivia                                                                                                                                                                                                                                                                                                                                                                                                                                                                                                                                                                                             |  |
| EPI_ISL_421512                                                                                                                                                                                                                                                                                                                                                                                                                                                                                                                                                                                                 | Service de Biologie Médicale - BP 125                                                                                                    | National Reference Center for Viruses of Respiratory Infections, Institut Pasteur, Paris                                                                             | Mélanie Albert, Marion Barbet, Sylvie Behillil, Méline Bizard, Angela Brisebarre, Flora Donati, Etienne Simon-Lorière, Vincent Enouf, Maud Vanpeene, Sylvie van der Werf, Christine Lambert                                                                                                                                                                                                                                                                                                                                                                                                                                                                                                                                                                                         |  |
| EPI_ISL_421513                                                                                                                                                                                                                                                                                                                                                                                                                                                                                                                                                                                                 | Service de Biologie clinique                                                                                                             | National Reference Center for Viruses of Respiratory Infections, Institut Pasteur, Paris                                                                             | Mélanie Albert, Marion Barbet, Sylvie Behillil, Méline Bizard, Angela Brisebarre, Flora Donati, Etienne Simon-Lorière, Vincent Enouf, Maud Vanpeene, Sylvie van der Werf, Christine Lambert                                                                                                                                                                                                                                                                                                                                                                                                                                                                                                                                                                                         |  |
| EPI_ISL_421514                                                                                                                                                                                                                                                                                                                                                                                                                                                                                                                                                                                                 | Sentinelles network                                                                                                                      | National Reference Center for Viruses of Respiratory Infections, Institut Pasteur, Paris                                                                             | Mélanie Albert, Marion Barbet, Sylvie Behillil, Méline Bizard, Angela Brisebarre, Flora Donati, Etienne Simon-Lorière, Vincent Enouf, Maud Vanpeene, Sylvie van der Werf                                                                                                                                                                                                                                                                                                                                                                                                                                                                                                                                                                                                            |  |
| EPI_ISL_421574                                                                                                                                                                                                                                                                                                                                                                                                                                                                                                                                                                                                 | Molecular Diagnostic Services                                                                                                            | KRISP, KZN Research Innovation and Sequencing Platform                                                                                                               | Glandharj J, Pillay S, Ngcapu S, Samsunder N, Lessells R, Chimumkangara B, Deforche K, Tegally H, Wilkinson E, de Oliveira T                                                                                                                                                                                                                                                                                                                                                                                                                                                                                                                                                                                                                                                        |  |
| EPI_ISL_421652                                                                                                                                                                                                                                                                                                                                                                                                                                                                                                                                                                                                 | Dasman Diabetes Institute                                                                                                                | Dasman Diabetes Institute                                                                                                                                            | Fahd Al-Mulla, Rasheeba Iqbal, Sumi John, Ebaa Al-Ozairi, Qais Al-Duwairi                                                                                                                                                                                                                                                                                                                                                                                                                                                                                                                                                                                                                                                                                                           |  |
| EPI_ISL_422407, EPI_ISL_422408, EPI_ISL_422409, EPI_ISL_422410, EPI_ISL_422411, EPI_ISL_422412, EPI_ISL_422413, EPI_ISL_422414, EPI_ISL_422415, EPI_ISL_422416, EPI_ISL_422417, EPI_ISL_422418, EPI_ISL_422419, EPI_ISL_422420, EPI_ISL_422421, EPI_ISL_422422                                                                                                                                                                                                                                                                                                                                                 | Department of Laboratory Medicine, National Taiwan University Hospital                                                                   | Microbial Genomics Core Lab, National Taiwan University Centers of Genomic and Precision Medicine                                                                    | Shiou-Hwei Yeh, You-Yu Lin, Ya-Yun Lai, Chiao-Ling Li, Shan-Chwen Chang, Pei-Jer Chen, Sui-Yuan Chang                                                                                                                                                                                                                                                                                                                                                                                                                                                                                                                                                                                                                                                                               |  |
| EPI_ISL_422424                                                                                                                                                                                                                                                                                                                                                                                                                                                                                                                                                                                                 | Jaber Al Ahmad Al Sabah Hospital                                                                                                         | Dasman diabetes Institute                                                                                                                                            | Fahd Al-Mulla, Rasheeba Iqbal, Sumi John, Ebaa Al-Ozairi, Qais Al-Duwairi                                                                                                                                                                                                                                                                                                                                                                                                                                                                                                                                                                                                                                                                                                           |  |
| EPI_ISL_422427                                                                                                                                                                                                                                                                                                                                                                                                                                                                                                                                                                                                 | JABER AL AHMAD AL SABAH HOSPITAL - KUWAIT CITY                                                                                           | Dasman Diabetes Institute                                                                                                                                            | Fahd Al-Mulla, Rasheeba Iqbal, Sumi John, Ebaa Al-Ozairi, Qais Al-Duwairi                                                                                                                                                                                                                                                                                                                                                                                                                                                                                                                                                                                                                                                                                                           |  |
| EPI_ISL_422636                                                                                                                                                                                                                                                                                                                                                                                                                                                                                                                                                                                                 | The National Institute of Public Health Center for Epidemiology and Microbiology                                                         | State Veterinary Institute Prague                                                                                                                                    | Alexander Nagy, Helena Jirincova, Klara Labska, Ludmila Novakova, Olga Storkanova, Dusan Trnka, Jaromira Vecerova                                                                                                                                                                                                                                                                                                                                                                                                                                                                                                                                                                                                                                                                   |  |
| EPI_ISL_424366                                                                                                                                                                                                                                                                                                                                                                                                                                                                                                                                                                                                 | Vaccine Research, Development and Application Center, Erciyes University                                                                 | Gen Era Diagnostics Inc.                                                                                                                                             | Shaikh Terkis Islam Pavel, Hazel Yetiskin, Günsu Aydın, Can Holyavkin, Muhammet Ali Uygut, Zehra B Dursun, İlhami Celik, Alper Iseri, Aykut Ozdarendeli                                                                                                                                                                                                                                                                                                                                                                                                                                                                                                                                                                                                                             |  |
| EPI_ISL_424629, EPI_ISL_424630, EPI_ISL_424631, EPI_ISL_424633, EPI_ISL_424636, EPI_ISL_424637, EPI_ISL_424640, EPI_ISL_424641, EPI_ISL_424642, EPI_ISL_424643, EPI_ISL_424644, EPI_ISL_424647, EPI_ISL_424649, EPI_ISL_424650, EPI_ISL_424652, EPI_ISL_424653, EPI_ISL_424654, EPI_ISL_424655, EPI_ISL_424657, EPI_ISL_424658, EPI_ISL_424660, EPI_ISL_424661, EPI_ISL_424664                                                                                                                                                                                                                                 | Department of Clinical Microbiology                                                                                                      | GIGA Medical Genomics                                                                                                                                                | Keith Durkin, Maria Artesi, Sébastien Bontems, Raphaël Boreux, Cécile Meex, Pierrette Melin, Marie-Pierre Hayette, Vincent Bours.                                                                                                                                                                                                                                                                                                                                                                                                                                                                                                                                                                                                                                                   |  |
| EPI_ISL_426364                                                                                                                                                                                                                                                                                                                                                                                                                                                                                                                                                                                                 | Instituto Nacional de Ciencias Medicas y Nutricion Salvador Zubiran                                                                      | Instituto Nacional de Ciencias Medicas y Nutricion                                                                                                                   | Guillermo M. Ruiz-Palacios, Pilar Ramos Cervantes, Violeta Ibarra Gonzalez, Fernando Ledesma Barrientos, Luis Alberto García Andrade, Alfredo Ponce de León Garduño, Irma López Martínez, Lucía Hernández Rivas, Gisela Barrera Badiola, Edgar García Condeado, Fabiola Garcés Ayala, Adnan Ariza Rodríguez, José Ernesto Ramírez González, Celia Boukadida, Santiago Avila Ríos, Mario Mújica Sánchez, José Arturo Martínez Orozco, Eduardo Becerril Vargas, Joel Armando Vázquez Pérez, Víctor Hugo Borja Aburto, Concepción Grajales Muñiz, Cesar Raúl González Bonilla, Carolina González Torres, Francisco Javier Gaytán Cervantes, José Esteban Muñoz Medina, Blanca Taboada, Alejandro Sánchez, Pavel Isa, Ricardo Grande, Gloria Vázquez, Francisco Pulido, Carlos F. Arias |  |
| EPI_ISL_426414                                                                                                                                                                                                                                                                                                                                                                                                                                                                                                                                                                                                 | Sir M P Shah Government Medical College                                                                                                  | Gujarat Biotechnology Research Centre                                                                                                                                | Ramesh Pandit, Tejas Shah, Ankit Hinsu, Pritesh Sabara, Apurvasinh Puvar, Janvi Raval, Monika Gandhi, Pinal Trivedi, Maharshi Pandya, Amit Kanani, Akanksha Verma, Nitin Savaliya, Raghavendra Kumar, Dinesh Kumar, Zubair Saiyed, Dipa Kinarwala, Disha Patel, Binita Aring, Geeta Vaghela, Bhashv Modi, Kairavi Joshi, Nidhi Sood, Pranay Shah, R D Dixit, Snehal Bagatharia, Madhvi Joshi, Chaitanya Joshi                                                                                                                                                                                                                                                                                                                                                                       |  |
| EPI_ISL_426415                                                                                                                                                                                                                                                                                                                                                                                                                                                                                                                                                                                                 | Sir M P Shah Government Medical College, Jamnagar                                                                                        | Gujarat Biotechnology Research Centre, Gandhinagar                                                                                                                   | Ramesh Pandit, Tejas Shah, Ankit Hinsu, Pritesh Sabara, Apurvasinh Puvar, Janvi Raval, Monika Gandhi, Pinal Trivedi, Maharshi Pandya, Amit Kanani, Akanksha Verma, Nitin Savaliya, Raghvendra Kumar, Dinesh Kumar, Zuber Saiyed, Dipa Kinarwala, Disha Patel, Binita Aring, Geeta Vaghela, Sonia Barve, Bhashv Modi, Kairavi Joshi, Nidhi Sood, Pranay Shah, R D Dixit, Snehal Bagatharia, Madhvi Joshi, Chaitanya Joshi                                                                                                                                                                                                                                                                                                                                                            |  |
| EPI_ISL_426580                                                                                                                                                                                                                                                                                                                                                                                                                                                                                                                                                                                                 | Instituto Sabin                                                                                                                          | Laboratory of Virology                                                                                                                                               | Fernando L Melo, Gustavo Barra, Ticiane H Santa-Rita, Pedro G Mesquita, Ikaro A Andrade, Tatsuya Nagata, Bergmann M Ribeiro                                                                                                                                                                                                                                                                                                                                                                                                                                                                                                                                                                                                                                                         |  |
| EPI_ISL_427307, EPI_ISL_427308, EPI_ISL_427309, EPI_ISL_427310, EPI_ISL_427311, EPI_ISL_427312, EPI_ISL_427314, EPI_ISL_427315, EPI_ISL_427319, EPI_ISL_427320, EPI_ISL_427321, EPI_ISL_427322, EPI_ISL_427323, EPI_ISL_427337, EPI_ISL_427338, EPI_ISL_427339                                                                                                                                                                                                                                                                                                                                                 | WHO National Influenza Centre Russian Federation                                                                                         | WHO National Influenza Centre Russian Federation                                                                                                                     | Andrey Komissarov, Artem Fadeev, Mariia Sergeeva, Anna Ivanova, Daria Danilenko                                                                                                                                                                                                                                                                                                                                                                                                                                                                                                                                                                                                                                                                                                     |  |
| EPI_ISL_427349, EPI_ISL_427350, EPI_ISL_427351, EPI_ISL_427352, EPI_ISL_427354, EPI_ISL_427357, EPI_ISL_427358, EPI_ISL_427359, EPI_ISL_427364, EPI_ISL_427366, EPI_ISL_427370, EPI_ISL_427371, EPI_ISL_427372, EPI_ISL_427379, EPI_ISL_427385, EPI_ISL_427388, EPI_ISL_427390                                                                                                                                                                                                                                                                                                                                 | Department of Clinical Microbiology                                                                                                      | GIGA Medical Genomics                                                                                                                                                | Keith Durkin, Maria Artesi, Sébastien Bontems, Raphaël Boreux, Cécile Meex, Pierrette Melin, Marie-Pierre Hayette, Vincent Bours.                                                                                                                                                                                                                                                                                                                                                                                                                                                                                                                                                                                                                                                   |  |
| EPI_ISL_427391                                                                                                                                                                                                                                                                                                                                                                                                                                                                                                                                                                                                 | Genomic Laboratory (GLAB) (Conjoint lab of Health Directorate of Istanbul and Istanbul Technical University)                             | Genomic Laboratory (GLAB), Istanbul Technical University                                                                                                             | Ilker Karacan, Tugba Kizilboga Akgun, Bugra Agaoglu, Gizem Alkurt, Jale Yildiz, Betsi Köse, Elnifaz Çelik, Mehtap Aydın, Levent Doganay, Gizem Dinler Doganay                                                                                                                                                                                                                                                                                                                                                                                                                                                                                                                                                                                                                       |  |
| EPI_ISL_428209                                                                                                                                                                                                                                                                                                                                                                                                                                                                                                                                                                                                 | Laboratory of Molecular Biology, Diagnostyka sp. z o.o.                                                                                  | Laboratory of Recombinant Vaccines                                                                                                                                   | Lukasz Rabalski, Anna Piotrowska-Mietelska, Boguslaw Szewczyk, Krystyna Bienkowska-Szewczyk                                                                                                                                                                                                                                                                                                                                                                                                                                                                                                                                                                                                                                                                                         |  |
| EPI_ISL_428229                                                                                                                                                                                                                                                                                                                                                                                                                                                                                                                                                                                                 | TSGH-CP molecular lab                                                                                                                    | TSGH-CP molecular lab                                                                                                                                                | Cheng-Lih Perng, Ming-Jr Jian, Chih-Kai Chang, Jung-Chung Lin, Kuo-Ming Yeh, Chien-Wen Chen, Sheng-Kang Chiu, Hsing-Yi Chung, Shih-Hung Tsai, Kuo-Sheng Hung, Tien-Yao Chang, Feng-Yee Chang, Hung-Sheng Shang                                                                                                                                                                                                                                                                                                                                                                                                                                                                                                                                                                      |  |
| EPI_ISL_428346                                                                                                                                                                                                                                                                                                                                                                                                                                                                                                                                                                                                 | Genomic Laboratory (GLAB) (Conjoint lab of Health Directorate of Istanbul and Istanbul Technical University)                             | Genomic Laboratory (GLAB), Istanbul Technical University                                                                                                             | Ilker Karacan, Tugba Kizilboga Akgun, Bugra Agaoglu, Gizem Alkurt, Jale Yildiz, Betsi Köse, Elnifaz Çelik, Arzu Irvem, Yasemin Kendir Demirkol, Ozlem Akgun Dogan, Mehtap Aydın, Levent Doganay, Gizem Dinler Doganay                                                                                                                                                                                                                                                                                                                                                                                                                                                                                                                                                               |  |
| EPI_ISL_428347                                                                                                                                                                                                                                                                                                                                                                                                                                                                                                                                                                                                 | Service de Biologie Médicale - BP 125                                                                                                    | National Reference Center for Viruses of Respiratory Infections, Institut Pasteur, Paris                                                                             | Mélanie Albert, Marion Barbet, Sylvie Behillil, Méline Bizard, Angela Brisebarre, Flora Donati, Etienne Simon-Lorière, Vincent Enouf, Maud Vanpeene, Sylvie van der Werf                                                                                                                                                                                                                                                                                                                                                                                                                                                                                                                                                                                                            |  |
| EPI_ISL_428348                                                                                                                                                                                                                                                                                                                                                                                                                                                                                                                                                                                                 | Maison de Santé du Val d'Ormois                                                                                                          | National Reference Center for Viruses of Respiratory Infections, Institut Pasteur, Paris                                                                             | Mélanie Albert, Marion Barbet, Sylvie Behillil, Méline Bizard, Angela Brisebarre, Flora Donati, Etienne Simon-Lorière, Vincent Enouf, Maud Vanpeene, Sylvie van der Werf                                                                                                                                                                                                                                                                                                                                                                                                                                                                                                                                                                                                            |  |
| EPI_ISL_428349                                                                                                                                                                                                                                                                                                                                                                                                                                                                                                                                                                                                 | Service de Biologie Médicale - BP 125                                                                                                    | National Reference Center for Viruses of Respiratory Infections, Institut Pasteur, Paris                                                                             | Mélanie Albert, Marion Barbet, Sylvie Behillil, Méline Bizard, Angela Brisebarre, Flora Donati, Etienne Simon-Lorière, Vincent Enouf, Maud Vanpeene, Sylvie van der Werf                                                                                                                                                                                                                                                                                                                                                                                                                                                                                                                                                                                                            |  |
| EPI_ISL_428350                                                                                                                                                                                                                                                                                                                                                                                                                                                                                                                                                                                                 | CH Jean de Navarre Laboratoire de Biologie                                                                                               | National Reference Center for Viruses of Respiratory Infections, Institut Pasteur, Paris                                                                             | Mélanie Albert, Marion Barbet, Sylvie Behillil, Méline Bizard, Angela Brisebarre, Flora Donati, Etienne Simon-Lorière, Vincent Enouf, Maud Vanpeene, Sylvie van der Werf                                                                                                                                                                                                                                                                                                                                                                                                                                                                                                                                                                                                            |  |
| EPI_ISL_428351, EPI_ISL_428352                                                                                                                                                                                                                                                                                                                                                                                                                                                                                                                                                                                 | GH Nord Essonne Service de Biologie clinique                                                                                             | National Reference Center for Viruses of Respiratory Infections, Institut Pasteur, Paris                                                                             | Mélanie Albert, Marion Barbet, Sylvie Behillil, Méline Bizard, Angela Brisebarre, Flora Donati, Etienne Simon-Lorière, Vincent Enouf, Maud Vanpeene, Sylvie van der Werf                                                                                                                                                                                                                                                                                                                                                                                                                                                                                                                                                                                                            |  |
| EPI_ISL_428353                                                                                                                                                                                                                                                                                                                                                                                                                                                                                                                                                                                                 | CH Compiègne Laboratoire de Biologie                                                                                                     | National Reference Center for Viruses of Respiratory Infections, Institut Pasteur, Paris                                                                             | Mélanie Albert, Marion Barbet, Sylvie Behillil, Méline Bizard, Angela Brisebarre, Flora Donati, Etienne Simon-Lorière, Vincent Enouf, Maud Vanpeene, Sylvie van der Werf                                                                                                                                                                                                                                                                                                                                                                                                                                                                                                                                                                                                            |  |
| EPI_ISL_428354                                                                                                                                                                                                                                                                                                                                                                                                                                                                                                                                                                                                 | LABM GH nord Essonne de Longjumeau - BP 125                                                                                              | National Reference Center for Viruses of Respiratory Infections, Institut Pasteur, Paris                                                                             | Mélanie Albert, Marion Barbet, Sylvie Behillil, Méline Bizard, Angela Brisebarre, Flora Donati, Etienne Simon-Lorière, Vincent Enouf, Maud Vanpeene, Sylvie van der Werf                                                                                                                                                                                                                                                                                                                                                                                                                                                                                                                                                                                                            |  |
| EPI_ISL_428355, EPI_ISL_428356, EPI_ISL_428357                                                                                                                                                                                                                                                                                                                                                                                                                                                                                                                                                                 | Institut Médico légal- Hop R. Poincaré                                                                                                   | National Reference Center for Viruses of Respiratory Infections, Institut Pasteur, Paris                                                                             | Mélanie Albert, Marion Barbet, Sylvie Behillil, Méline Bizard, Angela Brisebarre, Flora Donati, Etienne Simon-Lorière, Vincent Enouf, Maud Vanpeene, Sylvie van der Werf                                                                                                                                                                                                                                                                                                                                                                                                                                                                                                                                                                                                            |  |
| EPI_ISL_428358                                                                                                                                                                                                                                                                                                                                                                                                                                                                                                                                                                                                 | CH Jeanne de Navarre Laboratoire de Biologie                                                                                             | National Reference Center for Viruses of Respiratory Infections, Institut Pasteur, Paris                                                                             | Mélanie Albert, Marion Barbet, Sylvie Behillil, Méline Bizard, Angela Brisebarre, Flora Donati, Etienne Simon-Lorière, Vincent Enouf, Maud Vanpeene, Sylvie van der Werf                                                                                                                                                                                                                                                                                                                                                                                                                                                                                                                                                                                                            |  |
| EPI_ISL_428359, EPI_ISL_428360                                                                                                                                                                                                                                                                                                                                                                                                                                                                                                                                                                                 | CH Compiègne Laboratoire de Biologie                                                                                                     | National Reference Center for Viruses of Respiratory Infections, Institut Pasteur, Paris                                                                             | Mélanie Albert, Marion Barbet, Sylvie Behillil, Méline Bizard, Angela Brisebarre, Flora Donati, Etienne Simon-Lorière, Vincent Enouf, Maud Vanpeene, Sylvie van der Werf                                                                                                                                                                                                                                                                                                                                                                                                                                                                                                                                                                                                            |  |
| EPI_ISL_428361                                                                                                                                                                                                                                                                                                                                                                                                                                                                                                                                                                                                 | LABM GH nord Essonne de Longjumeau - BP 125                                                                                              | National Reference Center for Viruses of Respiratory Infections, Institut Pasteur, Paris                                                                             | Mélanie Albert, Marion Barbet, Sylvie Behillil, Méline Bizard, Angela Brisebarre, Flora Donati, Etienne Simon-Lorière, Vincent Enouf, Maud Vanpeene, Sylvie van der Werf                                                                                                                                                                                                                                                                                                                                                                                                                                                                                                                                                                                                            |  |
| EPI_ISL_428363                                                                                                                                                                                                                                                                                                                                                                                                                                                                                                                                                                                                 | GH Nord Essonne Service de Biologie clinique                                                                                             | National Reference Center for Viruses of Respiratory Infections, Institut Pasteur, Paris                                                                             | Mélanie Albert, Marion Barbet, Sylvie Behillil, Méline Bizard, Angela Brisebarre, Flora Donati, Etienne Simon-Lorière, Vincent Enouf, Maud Vanpeene, Sylvie van der Werf                                                                                                                                                                                                                                                                                                                                                                                                                                                                                                                                                                                                            |  |
| EPI_ISL_428365                                                                                                                                                                                                                                                                                                                                                                                                                                                                                                                                                                                                 | LABM GH nord Essonne de Longjumeau - BP 125                                                                                              | National Reference Center for Viruses of Respiratory Infections, Institut Pasteur, Paris                                                                             | Mélanie Albert, Marion Barbet, Sylvie Behillil, Méline Bizard, Angela Brisebarre, Flora Donati, Etienne Simon-Lorière, Vincent Enouf, Maud Vanpeene, Sylvie van der Werf                                                                                                                                                                                                                                                                                                                                                                                                                                                                                                                                                                                                            |  |
| EPI_ISL_428366                                                                                                                                                                                                                                                                                                                                                                                                                                                                                                                                                                                                 | CH Jeanne de Navarre Laboratoire de Biologie                                                                                             | National Reference Center for Viruses of Respiratory Infections, Institut Pasteur, Paris                                                                             | Mélanie Albert, Marion Barbet, Sylvie Behillil, Méline Bizard, Angela Brisebarre, Flora Donati, Etienne Simon-Lorière, Vincent Enouf, Maud Vanpeene, Sylvie van der Werf                                                                                                                                                                                                                                                                                                                                                                                                                                                                                                                                                                                                            |  |
| EPI_ISL_428367                                                                                                                                                                                                                                                                                                                                                                                                                                                                                                                                                                                                 | Cabinet Médical                                                                                                                          | National Reference Center for Viruses of Respiratory Infections, Institut Pasteur, Paris                                                                             | Mélanie Albert, Marion Barbet, Sylvie Behillil, Méline Bizard, Angela Brisebarre, Flora Donati, Etienne Simon-Lorière, Vincent Enouf, Maud Vanpeene, Sylvie van der Werf                                                                                                                                                                                                                                                                                                                                                                                                                                                                                                                                                                                                            |  |
| EPI_ISL_428368                                                                                                                                                                                                                                                                                                                                                                                                                                                                                                                                                                                                 | Genomic Laboratory (GLAB) (Conjoint lab of Health Directorate of Istanbul and Istanbul Technical University)                             | Genomic Laboratory (GLAB), Istanbul Technical University                                                                                                             | Ilker Karacan, Tugba Kizilboga Akgun, Bugra Agaoglu, Gizem Alkurt, Jale Yildiz, Betsi Köse, Elnifaz Çelik, Arzu Irvem, Yasemin Kendir Demirkol, Ozlem Akgun Dogan, Mehtap Aydın, Gizem Dinler Doganay                                                                                                                                                                                                                                                                                                                                                                                                                                                                                                                                                                               |  |
| EPI_ISL_428670                                                                                                                                                                                                                                                                                                                                                                                                                                                                                                                                                                                                 | Centre for Dengue Research                                                                                                               | Centre for Dengue Research                                                                                                                                           | Chandima Jeewandara, Dinuka Ariyaratne, Laksiri Gomes, Deshni Jayathilaka, Ananda Wijewickrama, Eranga Narangoda, Damayanthi Idampitiya, Neelika Malaige                                                                                                                                                                                                                                                                                                                                                                                                                                                                                                                                                                                                                            |  |
| EPI_ISL_428671                                                                                                                                                                                                                                                                                                                                                                                                                                                                                                                                                                                                 | Centre for Dengue Research                                                                                                               | Centre for Dengue Research                                                                                                                                           | Chandima Jeewandara, Dinuka Ariyatane, Laksiri Gomes, Deshni Jayathilaka, Diyanath Ranasinghe, Ananda Wijewickrama, Eranga Narangoda, Damayanthi Tdampitiya, Neelika Malavige                                                                                                                                                                                                                                                                                                                                                                                                                                                                                                                                                                                                       |  |
| EPI_ISL_428672, EPI_ISL_428673                                                                                                                                                                                                                                                                                                                                                                                                                                                                                                                                                                                 | Centre for Dengue Research                                                                                                               | Centre for Dengue Research                                                                                                                                           | Chandima Jeewandara, Dinuka Ariyaratne, Laksiri Gomes, Deshni Jayathilaka, Diyanath Ranasinghe, Ananda Wijewickrama, Eranga Narangoda, Damayanthi Idampitiya, Neelika Malavige                                                                                                                                                                                                                                                                                                                                                                                                                                                                                                                                                                                                      |  |
| EPI_ISL_428851, EPI_ISL_428852                                                                                                                                                                                                                                                                                                                                                                                                                                                                                                                                                                                 | FSBSI "Chumakov Federal Scientific Center for Research and Development of Immune-and-Biological Products of Russian Academy of Sciences" | FSBSI "Chumakov Federal Scientific Center for Research and Development of Immune-and-Biological Products of Russian Academy of Sciences" & NRC "Kurchatov institute" | Libov Kozlovskaya, Anastasia Pinaeva, Georgy Ignatyev, Anna Shishova, Aydar Ishmukhametov, Mikhail Rychev, Egor Prokhorchuk, Denis Protsenko, Anastasia Berestovskaya                                                                                                                                                                                                                                                                                                                                                                                                                                                                                                                                                                                                               |  |
| EPI_ISL_428855                                                                                                                                                                                                                                                                                                                                                                                                                                                                                                                                                                                                 | MRCG at LSHTM Genomics lab                                                                                                               | MRCG at LSHTM Genomics lab                                                                                                                                           | Sesay et al                                                                                                                                                                                                                                                                                                                                                                                                                                                                                                                                                                                                                                                                                                                                                                         |  |
| EPI_ISL_428856                                                                                                                                                                                                                                                                                                                                                                                                                                                                                                                                                                                                 | MRCG at LSHTM Genomics Lab                                                                                                               | MRCG at LSHTM Genomics Lab                                                                                                                                           | Sesay et al                                                                                                                                                                                                                                                                                                                                                                                                                                                                                                                                                                                                                                                                                                                                                                         |  |
| EPI_ISL_429256                                                                                                                                                                                                                                                                                                                                                                                                                                                                                                                                                                                                 | Health Sciences Technology Park, Avicena, 8, 18016 Granada, Spain                                                                        | Sequencing and Bioinformatics Service FISABIO-Public Health                                                                                                          | Joaquín Mendoza, Almudena Rojas, Pablo Mendoza                                                                                                                                                                                                                                                                                                                                                                                                                                                                                                                                                                                                                                                                                                                                      |  |
| EPI_ISL_429852                                                                                                                                                                                                                                                                                                                                                                                                                                                                                                                                                                                                 | Centers for Disease Control and Prevention of Lishui                                                                                     | Department of InspectionCenters for Disease Control and Prevention of Lishui                                                                                         | Wang Xiaoguang, Ji Qiaoying, Ji Jiansong, Ye Bifeng, Ye Ling                                                                                                                                                                                                                                                                                                                                                                                                                                                                                                                                                                                                                                                                                                                        |  |
| EPI_ISL_429853                                                                                                                                                                                                                                                                                                                                                                                                                                                                                                                                                                                                 | Centers for Disease Control and Prevention of Lishui                                                                                     | Department of InspectionCenters for Disease Control and Prevention of Lishui                                                                                         | Wang Xiaoguang, Ji Qiaoying, Ji Jiansong, Ye Bifeng, Ye Ling                                                                                                                                                                                                                                                                                                                                                                                                                                                                                                                                                                                                                                                                                                                        |  |
| EPI_ISL_429854                                                                                                                                                                                                                                                                                                                                                                                                                                                                                                                                                                                                 | Centers for Disease Control and Prevention of Lishui                                                                                     | Department of InspectionCenters for Disease Control and Prevention of Lishui                                                                                         | Wang Xiaoguang, Ji Qiaoying, Ji Jiansong, Ye Bifeng, Ye Ling                                                                                                                                                                                                                                                                                                                                                                                                                                                                                                                                                                                                                                                                                                                        |  |
| EPI_ISL_429968                                                                                                                                                                                                                                                                                                                                                                                                                                                                                                                                                                                                 | Centre Hospitalier Compiègne Laboratoire de Biologie                                                                                     | National Reference Center for Viruses of Respiratory Infections, Institut Pasteur, Paris                                                                             | Mélanie Albert, Marion Barbet, Sylvie Behillil, Méline Bizard, Angela Brisebarre, Flora Donati, Fabiana Gambaro, Etienne Simon-Lorière, Vincent Enouf, Maud Vanpeene, Sylvie van der Werf, Raulin Olivia                                                                                                                                                                                                                                                                                                                                                                                                                                                                                                                                                                            |  |
| EPI_ISL_430067, EPI_ISL_430068, EPI_ISL_430069, EPI_ISL_430070, EPI_ISL_430071, EPI_ISL_430072, EPI_ISL_430073, EPI_ISL_430074, EPI_ISL_430075, EPI_ISL_430076, EPI_ISL_430077, EPI_ISL_430078, EPI_ISL_430079, EPI_ISL_430080, EPI_ISL_430081, EPI_ISL_430082, EPI_ISL_430083, EPI_ISL_430084, EPI_ISL_430085, EPI_ISL_430086, EPI_ISL_430087, EPI_ISL_430088, EPI_ISL_430089, EPI_ISL_430090, EPI_ISL_430100, EPI_ISL_430101, EPI_ISL_430102, EPI_ISL_430103, EPI_ISL_430104, EPI_ISL_430105, EPI_ISL_430106, EPI_ISL_430107, EPI_ISL_430108, EPI_ISL_430109, EPI_ISL_430110, EPI_ISL_430111, EPI_ISL_430112 | WHO National Influenza Centre Russian Federation                                                                                         | WHO National Influenza Centre Russian Federation                                                                                                                     | Andrey Komissarov, Artem Fadeev, Mariia Sergeeva, Anna Ivanova, Daria Danilenko                                                                                                                                                                                                                                                                                                                                                                                                                                                                                                                                                                                                                                                                                                     |  |
| EPI_ISL_430297                                                                                                                                                                                                                                                                                                                                                                                                                                                                                                                                                                                                 | National Institute for Communicable Diseases of the                                                                                      | National Institute for Communicable Diseases of the National Health Laboratory Service                                                                               | Allam M, Kwenda S, van Heusden P, Khumalo Z, Mohale T, Subramoney K, von Gottberg, A, Ismail A, Bhiman JN                                                                                                                                                                                                                                                                                                                                                                                                                                                                                                                                                                                                                                                                           |  |

|                                                                                                                                                                                                                                                                |                                                                                                                                                                      |                                                                                                                                                          |                                                                                                                                                                                                                                                                                                                                                                                                                                                                                                                                                |
|----------------------------------------------------------------------------------------------------------------------------------------------------------------------------------------------------------------------------------------------------------------|----------------------------------------------------------------------------------------------------------------------------------------------------------------------|----------------------------------------------------------------------------------------------------------------------------------------------------------|------------------------------------------------------------------------------------------------------------------------------------------------------------------------------------------------------------------------------------------------------------------------------------------------------------------------------------------------------------------------------------------------------------------------------------------------------------------------------------------------------------------------------------------------|
| EPI_ISL_430441, EPI_ISL_430442, EPI_ISL_430444                                                                                                                                                                                                                 | National Health Laboratory Service<br>Institute for Medical Research, Infectious Disease Research Centre, National Institutes of Health, Ministry of Health Malaysia | Institute for Medical Research, Infectious Disease Research Centre, National Institutes of Health, Ministry of Health Malaysia                           | Suppiah J, Mohd-Zawawi Z., Kalyanasundram J, Azizan.M-A, Mat-Sharani.S, Hisham.H-A, Tan.L-P, Abdul-Wahid.M-Z, Tengku-Rogayah.TAR, Mohd-Zain.R, Ahmad.N, Thayan.R                                                                                                                                                                                                                                                                                                                                                                               |
| EPI_ISL_430469                                                                                                                                                                                                                                                 | Hellenic Pasteur Institute, Public Health Laboratories                                                                                                               | Hellenic Pasteur Institute, Public Health Laboratories, Unit of Bioinformatics and Applied Genomics                                                      | Vasiliki Pogka, Timokratris Karamitros, Athanasios Kossyvakis, Antonios Kalliaropoulos, Horefti Elina, Evangelidou Maria, Androniki Voulgari-Kokota, Aspasia Kontou, Andreas Mentis                                                                                                                                                                                                                                                                                                                                                            |
| EPI_ISL_430722, EPI_ISL_430724, EPI_ISL_430725, EPI_ISL_430728, EPI_ISL_430729, EPI_ISL_430730, EPI_ISL_430731, EPI_ISL_430733, EPI_ISL_430734, EPI_ISL_430735, EPI_ISL_430736, EPI_ISL_430737, EPI_ISL_430738, EPI_ISL_430740, EPI_ISL_430741, EPI_ISL_430742 | Chinese PLA Institute for Disease Control and Prevention<br>Center of Scientific Excellence for Influenza Viruses,National Research Centre (NRC), Egypt.             | Chinese PLA Institute for Disease Control and Prevention<br>Center of Scientific Excellence for Influenza Viruses,National Research Centre (NRC), Egypt. | Peng Lijinhui Li, Lizhong Li<br>Mohamed Ahmed Ali, Ahmed Kandeil, Ahmed Mostafa, Rabeh El-Shesheny, Mahmoud Shehata, Wael Roshdy, Shymaa Showky Ahmed , Amal Naguib, Nancy M. El Guindy, Mokhtar Gomaa, Ahmed El-Taweel, Ahmed E Kayed, Yassmin Moatasim, Omnia Kutkat, Sara Mahmoud, Mina Kamel, Abo Shama, M Noura, Mohamed El Sayes                                                                                                                                                                                                         |
| EPI_ISL_430819                                                                                                                                                                                                                                                 | Center of Scientific Excellence for Influenza Viruses,National Research Centre (NRC), Egypt.                                                                         | Center of Scientific Excellence for Influenza Viruses,National Research Centre (NRC), Egypt.                                                             | Mohamed Ahmed Ali, Ahmed Kandeil, Ahmed Mostafa, Rabeh El-Shesheny, Mahmoud Shehata, Wael Roshdy, Shymaa Showky Ahmed , Amal Naguib, Mokhtar Gomaa, Ahmed El-Taweel, Ahmed E Kayed, Yassmin Moatasim, Omnia Kutkat, Sara Mahmoud, Mina Kamel, Abo Shama, M Noura, Mohamed El Sayes, Nancy M. El Guindy                                                                                                                                                                                                                                         |
| EPI_ISL_430820                                                                                                                                                                                                                                                 | Center of Scientific Excellence for Influenza Viruses, National Research Centre (NRC), Egypt.                                                                        | Center of Scientific Excellence for Influenza Viruses, National Research Centre (NRC), Egypt.                                                            | Mohamed Ahmed Ali, Ahmed Kandeil, Ahmed Mostafa, Rabeh El-Shesheny, Mahmoud Shehata, Wael Roshdy, Shymaa Showky Ahmed , Amal Naguib, Mokhtar Gomaa, Ahmed El-Taweel, Ahmed E Kayed, Yassmin Moatasim, Omnia Kutkat, Sara Mahmoud, Mina Kamel, Abo Shama, M Noura, Mohamed El Sayes, Nancy M. El Guindy                                                                                                                                                                                                                                         |
| EPI_ISL_431101                                                                                                                                                                                                                                                 | Department of Microbiology,Gandhi Medical College and Hospital                                                                                                       | Virus Research Laboratory, Department of Zoology, Osmania University,Hyderabad,India                                                                     | Muttineni Radhakrishna, Nagamani K, Thrilok Chandar B, Raja Rao M, Kalyani Putty, Ravikummar P, Sunitha P, Pankaj Singh D, Anand Kumar K, Amit A. Upadhyay Steven E. Bosinger, Rama Amara                                                                                                                                                                                                                                                                                                                                                      |
| EPI_ISL_431102                                                                                                                                                                                                                                                 | Department of Microbiology,Gandhi Medical College and Hospital,Secendrabad,Hyderabad,India                                                                           | Department of Microbiology, Gandhi Medical College and Hospital, Secendrabad, Hyderabad                                                                  | Nagamani K, Muttineni Radhakrishna, Thrilok Chandar B, Raja Rao M, Kalyani Putty, Ravikummar P, Sunitha P, Pankaj Singh D, Anand Kumar K, Amit A. Upadhyay, Steven E. Bosinger, Rama Amara                                                                                                                                                                                                                                                                                                                                                     |
| EPI_ISL_431103                                                                                                                                                                                                                                                 | Department of Microbiology, Gandhi Medical College and Hospital, Secendrabad, Hyderabad, India                                                                       | Department of Microbiology, Gandhi Medical College and Hospital, Secendrabad, Hyderabad, India                                                           | Nagamani K, Muttineni Radhakrishna, Thrilok Chandar B, Raja Rao M, Kalyani Putty, Ravikummar P, Sunitha P, Pankaj Singh D, Anand Kumar K, Amit A. Upadhyay, Steven E. Bosinger, Rama Amara                                                                                                                                                                                                                                                                                                                                                     |
| EPI_ISL_431117                                                                                                                                                                                                                                                 | Department of Microbiology, Gandhi Medical College and Hospital, Secendrabad, Hyderabad, India                                                                       | Department of Microbiology, Gandhi Medical College and Hospital, Secendrabad, Hyderabad, India                                                           | Thrilok Chandar B, Muttineni Radhakrishna, Nagamani K, Raja Rao M, Kalyani Putty, Ravikummar P, Sunitha P, Pankaj Singh D, Anand Kumar K, Amit A. Upadhyay, Steven E. Bosinger, Rama Amara                                                                                                                                                                                                                                                                                                                                                     |
| EPI_ISL_431118, EPI_ISL_431180, EPI_ISL_431240, EPI_ISL_431782, EPI_ISL_431783, EPI_ISL_431784, EPI_ISL_431785                                                                                                                                                 | Fujian Center for Disease Control and Prevention                                                                                                                     | Fujian Center for Disease Control and Prevention                                                                                                         | Lin Qi, Huang Zhimingao, Zhang Yanhua, Weng Yuwei                                                                                                                                                                                                                                                                                                                                                                                                                                                                                              |
| EPI_ISL_434366, EPI_ISL_434369, EPI_ISL_434371                                                                                                                                                                                                                 | Hospital AZ Rivierenland                                                                                                                                             | Institute of Tropical Medicine                                                                                                                           | Philippe Selhorst, Colin Anthony                                                                                                                                                                                                                                                                                                                                                                                                                                                                                                               |
| EPI_ISL_434372, EPI_ISL_434373, EPI_ISL_434375, EPI_ISL_434376, EPI_ISL_434377, EPI_ISL_434378, EPI_ISL_434379, EPI_ISL_434380, EPI_ISL_434381, EPI_ISL_434383                                                                                                 | Hospital AZ Rivierenland                                                                                                                                             | Institute of Tropical Medicine                                                                                                                           | Philippe Selhorst, Colin Anthony                                                                                                                                                                                                                                                                                                                                                                                                                                                                                                               |
| EPI_ISL_434384                                                                                                                                                                                                                                                 | Hospital AZ Rivierenland                                                                                                                                             | Institute of Tropical Medicine                                                                                                                           | Philippe Selhorst, Colin Anthony                                                                                                                                                                                                                                                                                                                                                                                                                                                                                                               |
| EPI_ISL_434533                                                                                                                                                                                                                                                 | Area de Salud Alajuela Sur                                                                                                                                           | Incienza, Instituto Costarricense de Investigación y Enseñanza en Nutrición y Salud                                                                      | Francisco Duarte, Hebleen Porras, Claudio Soto-Garita, Estela Cordero, Adriana Godínez & Melany Calderon                                                                                                                                                                                                                                                                                                                                                                                                                                       |
| EPI_ISL_434534                                                                                                                                                                                                                                                 | National Institute for Viral Disease Control and Prevention, China CDC                                                                                               | National Institute for Viral Disease Control and Prevention, China CDC, Yunnan Provincial CDC                                                            | Wenjie Tan, Roujian Lu, Wenling Wang, Peihua Niu, Huijuan Wang, Baoying Huang, Li Zhao, Fei Ye, Guizhen Wu                                                                                                                                                                                                                                                                                                                                                                                                                                     |
| EPI_ISL_434535                                                                                                                                                                                                                                                 | Area de Salud Alajuela Sur                                                                                                                                           | Incienza, Instituto Costarricense de Investigación y Enseñanza en Nutrición y Salud                                                                      | Francisco Duarte, Hebleen Porras, Claudio Soto-Garita, Estela Cordero, Adriana Godínez & Melany Calderon                                                                                                                                                                                                                                                                                                                                                                                                                                       |
| EPI_ISL_434538                                                                                                                                                                                                                                                 | COOPESAIN                                                                                                                                                            | Incienza, Instituto Costarricense de Investigación y Enseñanza en Nutrición y Salud                                                                      | Francisco Duarte, Hebleen Porras, Claudio Soto-Garita, Estela Cordero, Adriana Godínez & Melany Calderon                                                                                                                                                                                                                                                                                                                                                                                                                                       |
| EPI_ISL_434539                                                                                                                                                                                                                                                 | Area de Salud Orotina                                                                                                                                                | Incienza, Instituto Costarricense de Investigación y Enseñanza en Nutrición y Salud                                                                      | Francisco Duarte, Hebleen Porras, Claudio Soto-Garita, Estela Cordero, Adriana Godínez & Melany Calderon                                                                                                                                                                                                                                                                                                                                                                                                                                       |
| EPI_ISL_434541, EPI_ISL_434543, EPI_ISL_434545, EPI_ISL_434546, EPI_ISL_434547, EPI_ISL_434548, EPI_ISL_434549, EPI_ISL_434551                                                                                                                                 | Puerto Rico Department of Health                                                                                                                                     | Centers for Disease Control and Prevention, Dengue Branch                                                                                                | Gilberto A. Santiago, Glenda Gonzalez, Betzabel Flores, Keyla Charriez, Fabiola Cruz, Chaney Kalinich, Joseph Fauver, Jessica I. Falcon, Nathan Grubaugh, Jorge L. Munoz-Jordan                                                                                                                                                                                                                                                                                                                                                                |
| EPI_ISL_434572                                                                                                                                                                                                                                                 | The National Institute of Public Health Center for Epidemiology and Microbiology                                                                                     | The National Institute of Public Health Center for Epidemiology and Microbiology                                                                         | Alexander Nagy, Helena Jirincova, Ludmila Novakova, Dusan Trnka, Jaromira Vecerova                                                                                                                                                                                                                                                                                                                                                                                                                                                             |
| EPI_ISL_435045                                                                                                                                                                                                                                                 | Laboratory of Applied Genetics                                                                                                                                       | RSE "National Center for Biotechnology"                                                                                                                  | Alexandr Shevtsov, Ilyas Akhmetolayev, Viktoriya Lutsay, Asylylan Amirgazin, Ruslan Kalendar, Yerlan Ramanculov                                                                                                                                                                                                                                                                                                                                                                                                                                |
| EPI_ISL_435049                                                                                                                                                                                                                                                 | B.J. Medical College and Civil hospital                                                                                                                              | Gujarat Biotechnology Research Centre                                                                                                                    | Pinal Trivedi, Maharshi Pandya, Amit Kanani, Akanksha Verma, Nitin Savaliya, Raghavendra Kumar, Dinesh Kumar, Zuber Saiyed, Dipa Kinarivala, Disha Patel, Binita Aring, Geeta Vaghela, Sonia Barve, Bhavesh Modi, Kairavi Joshi, Gaurishankar Shrimali, Nidhi Sood, Pranay Shah, R D Dixit, Snehal Bagatharia, Kamlesh J Upadhyay, Ramesh Pandit, Tejas Shah, Ankit Hinsu, Pritesh Sabara, Apurvasinh Puvar, Janvi Raval, Monika Gandhi, Neha Rajpara, Chaitanya Joshi, Madhvi Joshi                                                           |
| EPI_ISL_435050                                                                                                                                                                                                                                                 | B.J. Medical College and Civil hospital                                                                                                                              | Gujarat Biotechnology Research Centre                                                                                                                    | Ankit Hinsu, Pritesh Sabara, Apurvasinh Puvar, Janvi Raval, Monika Gandhi, Pinal Trivedi, Maharshi Pandya, Amit Kanani, Akanksha Verma, Nitin Savaliya, Raghavendra Kumar, Dinesh Kumar, Zuber Saiyed, Dipa Kinarivala, Disha Patel, Binita Aring, Geeta Vaghela, Sonia Barve, Bhavesh Modi, Kairavi Joshi, Gaurishankar Shrimali, Nidhi Sood, Pranay Shah, R D Dixit, Snehal Bagatharia, Kamlesh J Upadhyay, Ramesh Pandit, Tejas Shah, Dipeshwari Shewale, Chaitanya Joshi, Madhvi Joshi                                                     |
| EPI_ISL_435051                                                                                                                                                                                                                                                 | B.J. Medical College and Civil hospital                                                                                                                              | Gujarat Biotechnology Research Centre                                                                                                                    | Pritesh Sabara, Apurvasinh Puvar, Janvi Raval, Monika Gandhi, Pinal Trivedi, Maharshi Pandya, Amit Kanani, Akanksha Verma, Nitin Savaliya, Raghavendra Kumar, Dinesh Kumar, Zuber Saiyed, Dipa Kinarivala, Disha Patel, Binita Aring, Geeta Vaghela, Sonia Barve, Bhavesh Modi, Kairavi Joshi, Gaurishankar Shrimali, Nidhi Sood, Pranay Shah, R D Dixit, Snehal Bagatharia, Kamlesh J Upadhyay, Ramesh Pandit, Tejas Shah, Ankit Hinsu, Vusudha Sharma, Chaitanya Joshi, Madhvi Joshi                                                         |
| EPI_ISL_435052                                                                                                                                                                                                                                                 | B.J. Medical College and Civil hospital                                                                                                                              | Gujarat Biotechnology Research Centre                                                                                                                    | Apurvasinh Puvar, Janvi Raval, Monika Gandhi, Pinal Trivedi, Maharshi Pandya, Amit Kanani, Akanksha Verma, Nitin Savaliya, Raghavendra Kumar, Dinesh Kumar, Zuber Saiyed, Dipa Kinarivala, Disha Patel, Binita Aring, Geeta Vaghela, Sonia Barve, Bhavesh Modi, Kairavi Joshi, Gaurishankar Shrimali, Nidhi Sood, Pranay Shah, R D Dixit, Snehal Bagatharia, Kamlesh J Upadhyay, Ramesh Pandit, Tejas Shah, Ankit Hinsu, Pritesh Sabara, Pooja P Doshi, Chaitanya Joshi, Madhvi Joshi                                                          |
| EPI_ISL_435053                                                                                                                                                                                                                                                 | B.J. Medical College and Civil hospital                                                                                                                              | Gujarat Biotechnology Research Centre                                                                                                                    | Janvi Raval, Monika Gandhi, Pinal Trivedi, Maharshi Pandya, Amit Kanani, Akanksha Verma, Nitin Savaliya, Raghavendra Kumar, Dinesh Kumar, Zuber Saiyed, Dipa Kinarivala, Disha Patel, Binita Aring, Geeta Vaghela, Sonia Barve, Bhavesh Modi, Kairavi Joshi, Gaurishankar Shrimali, Nidhi Sood, Pranay Shah, R D Dixit, Snehal Bagatharia, Kamlesh J Upadhyay, Ramesh Pandit, Tejas Shah, Ankit Hinsu, Pritesh Sabara, Apurvasinh Puvar, Nidhi Patel, Chaitanya Joshi, Madhvi Joshi                                                            |
| EPI_ISL_435055                                                                                                                                                                                                                                                 | Gujarat Biotechnology Research Centre                                                                                                                                | Gujarat Biotechnology Research Centre                                                                                                                    | Tejas Shah, Ankit Hinsu, Pritesh Sabara, Apurvasinh Puvar, Janvi Raval, Monika Gandhi, Pinal Trivedi, Maharshi Pandya, Amit Kanani, Akanksha Verma, Nitin Savaliya, Raghavendra Kumar, Dinesh Kumar, Zuber Saiyed, Dipa Kinarivala, Disha Patel, Binita Aring, Geeta Vaghela, Sonia Barve, Bhavesh Modi, Kairavi Joshi, Gaurishankar Shrimali, Nidhi Sood, Pranay Shah, R D Dixit, Snehal Bagatharia, Kamlesh J Upadhyay, Ramesh Pandit, Tejas Shah, Ankit Hinsu, Pritesh Sabara, Apurvasinh Puvar, Nidhi Patel, Chaitanya Joshi, Madhvi Joshi |
| EPI_ISL_435056                                                                                                                                                                                                                                                 | Gujarat Biotechnology Research Centre                                                                                                                                | Gujarat Biotechnology Research Centre                                                                                                                    | Maharshi Pandya, Amit Kanani, Akanksha Verma, Nitin Savaliya, Raghavendra Kumar, Dinesh Kumar, Zuber Saiyed, Dipa Kinarivala, Disha Patel, Binita Aring, Geeta Vaghela, Sonia Barve, Bhavesh Modi, Kairavi Joshi, Gaurishankar Shrimali, Nidhi Sood, Pranay Shah, R D Dixit, Snehal Bagatharia, Kamlesh J Upadhyay, Ramesh Pandit, Tejas Shah, Ankit Hinsu, Pritesh Sabara, Apurvasinh Puvar, Janvi Raval, Monika Gandhi, Pinal Trivedi, Alfiz Ansari, Chaitanya Joshi, Madhvi Joshi                                                           |
| EPI_ISL_435145                                                                                                                                                                                                                                                 | Ospedale Civile Giuseppe Mazzini                                                                                                                                     | Istituto Zooprofilattico Sperimentale dell'Abruzzo e Molise "G.Caporale"                                                                                 | Lorusso A, Marccacci M, Di Domenico M, Ancora M, Curini V, Mangone I, Rinaldi A, Di Pasquale A, Cammà C, Puglia I, Savini G                                                                                                                                                                                                                                                                                                                                                                                                                    |
| EPI_ISL_435146, EPI_ISL_435147                                                                                                                                                                                                                                 | Villa Serena del Dr. Leonardo Petruzzi                                                                                                                               | Istituto Zooprofilattico Sperimentale dell'Abruzzo e Molise "G.Caporale"                                                                                 | Lorusso A, Marccacci M, Di Domenico M, Ancora M, Curini V, Mangone I, Rinaldi A, Di Pasquale A, Cammà C, Puglia I, Savini G                                                                                                                                                                                                                                                                                                                                                                                                                    |
| EPI_ISL_435148                                                                                                                                                                                                                                                 | Ospedale SS Annunziata                                                                                                                                               | Istituto Zooprofilattico Sperimentale dell'Abruzzo e Molise "G.Caporale"                                                                                 | Lorusso A, Marccacci M, Di Domenico M, Ancora M, Curini V, Mangone I, Rinaldi A, Di Pasquale A, Cammà C, Puglia I, Savini G                                                                                                                                                                                                                                                                                                                                                                                                                    |
| EPI_ISL_435149                                                                                                                                                                                                                                                 | SERVIZIO DI IGIENE E SANITÀ PUBBLICA ASL Teramo                                                                                                                      | Istituto Zooprofilattico Sperimentale dell'Abruzzo e Molise "G.Caporale"                                                                                 | Lorusso A, Marccacci M, Di Domenico M, Ancora M, Curini V, Mangone I, Rinaldi A, Di Pasquale A, Cammà C, Puglia I, Savini G                                                                                                                                                                                                                                                                                                                                                                                                                    |
| EPI_ISL_435150, EPI_ISL_435151                                                                                                                                                                                                                                 | Ospedale SS Annunziata                                                                                                                                               | Istituto Zooprofilattico Sperimentale dell'Abruzzo e Molise "G.Caporale"                                                                                 | Lorusso A, Marccacci M, Di Domenico M, Ancora M, Curini V, Mangone I, Rinaldi A, Di Pasquale A, Cammà C, Puglia I, Savini G                                                                                                                                                                                                                                                                                                                                                                                                                    |
| EPI_ISL_435152                                                                                                                                                                                                                                                 | Servizio di Igiene, Epidemiologia e Sanità Pubblica (SIESP) Avezzano                                                                                                 | Istituto Zooprofilattico Sperimentale dell'Abruzzo e Molise "G.Caporale"                                                                                 | Lorusso A, Marccacci M, Di Domenico M, Ancora M, Curini V, Mangone I, Rinaldi A, Di Pasquale A, Cammà C, Puglia I, Savini G                                                                                                                                                                                                                                                                                                                                                                                                                    |
| EPI_ISL_435153, EPI_ISL_435154, EPI_ISL_435155                                                                                                                                                                                                                 | SERVIZIO DI IGIENE E SANITÀ PUBBLICA ASL Teramo                                                                                                                      | Istituto Zooprofilattico Sperimentale dell'Abruzzo e Molise "G.Caporale"                                                                                 | Lorusso A, Marccacci M, Di Domenico M, Ancora M, Curini V, Mangone I, Rinaldi A, Di Pasquale A, Cammà C, Puglia I, Savini G                                                                                                                                                                                                                                                                                                                                                                                                                    |
| EPI_ISL_435281                                                                                                                                                                                                                                                 | Medistra Hospital Jakarta                                                                                                                                            | Eijkman Institute for Molecular Biology, Ministry of Research and Technology/National Agency for Research and Innovation                                 | Edison Johar, Frilasita A Yudhaputri, Hidayat Trimarsanto, David H Muljono, Safarina G Malik, Khin Saw Myint, Amin Soebandrio                                                                                                                                                                                                                                                                                                                                                                                                                  |
| EPI_ISL_435282, EPI_ISL_435283                                                                                                                                                                                                                                 | RS Pondok Indah Hospital - Pondok Indah                                                                                                                              | Eijkman Institute for Molecular Biology, Ministry of Research and Technology/National Agency for Research and Innovation                                 | Edison Johar, Frilasita A Yudhaputri, Hidayat Trimarsanto, David H Muljono, Safarina G Malik, Khin Saw Myint, Amin Soebandrio                                                                                                                                                                                                                                                                                                                                                                                                                  |
| EPI_ISL_435284                                                                                                                                                                                                                                                 | Central Virology Laboratory, Israel Ministry of Health                                                                                                               | Central Virology Laboratory, Israel Ministry of Health                                                                                                   | Neta Zuckerman, Efrat Bucris, Oran Erster, Danit Sofer, Orna Mor, Ella Mendelson, Michal Mandelboim                                                                                                                                                                                                                                                                                                                                                                                                                                            |
| EPI_ISL_435286                                                                                                                                                                                                                                                 | Central Virology Laboratory, Israel Ministry of Health                                                                                                               | Central Virology Laboratory, Israel Ministry of Health                                                                                                   | eta Zuckerman, Efrat Bucris, Oran Erster, Orna Mor, Ella Mendelson, Michal Mandelboim, Danit Sofer                                                                                                                                                                                                                                                                                                                                                                                                                                             |
| EPI_ISL_435289                                                                                                                                                                                                                                                 | Central Virology Laboratory, Israel Ministry of Health                                                                                                               | Central Virology Laboratory, Israel Ministry of Health                                                                                                   | Neta Zuckerman, Efrat Bucris, Oran Erster, Danit Sofer, Orna Mor, Ella Mendelson, Michal Mandelboim                                                                                                                                                                                                                                                                                                                                                                                                                                            |
| EPI_ISL_435291                                                                                                                                                                                                                                                 | Central Virology Laboratory, Israel Ministry of Health                                                                                                               | Central Virology Laboratory, Israel Ministry of Health                                                                                                   | Neta Zuckerman, Efrat Bucris, Oran Erster, Danit Sofer, Orna Mor, Ella Mendelson, Michal Mandelboim                                                                                                                                                                                                                                                                                                                                                                                                                                            |
| EPI_ISL_435292                                                                                                                                                                                                                                                 | Central Virology Laboratory, Israel Ministry of Health                                                                                                               | Central Virology Laboratory, Israel Ministry of Health                                                                                                   | Neta Zuckerman, Efrat Bucris, Oran Erster, Danit Sofer, Ella Mendelson, Michal Mandelboim, Orna Mor                                                                                                                                                                                                                                                                                                                                                                                                                                            |
| EPI_ISL_435303                                                                                                                                                                                                                                                 | National Hospital of Tropical Diseases                                                                                                                               | Oxford University Clinical Research Unit, Hanoi, Vietnam                                                                                                 | Nguyen Thi Tam, Van Dinh Trang, Nguyen Thi Ngoc Diep, Le Nguyen Minh Hoa, Pham Ngoc Thach, H.Rogier van Doorn, on behalf of the OUCRU COVID-19 research group                                                                                                                                                                                                                                                                                                                                                                                  |
| EPI_ISL_435305                                                                                                                                                                                                                                                 | National Hospital of Tropical Diseases                                                                                                                               | Oxford University Clinical Research Unit, Hanoi, Vietnam                                                                                                 | Nguyen Thi Tam, Van Dinh Trang, Nguyen Thu Trang, Nguyen Thi Ngoc Diep, Le Nguyen Minh Hoa, Pham Ngoc Thach, H. Rogier van Doorn, on behalf of the OUCRU COVID-19 research group                                                                                                                                                                                                                                                                                                                                                               |
| EPI_ISL_435405, EPI_ISL_435407, EPI_ISL_435408, EPI_ISL_435410, EPI_ISL_435412, EPI_ISL_435414, EPI_ISL_435416, EPI_ISL_435419, EPI_ISL_435422, EPI_ISL_435423, EPI_ISL_435424, EPI_ISL_435425, EPI_ISL_435430, EPI_ISL_435431                                 | see above<br>Virological Research Group, Szentágotthai Research Centre                                                                                               | Bioinformatics Research Group, Szentágotthai Research Centre                                                                                             | Péter Urbán, Endre Gábor Tóth, Gábor Kemenesi, Róbert Herczeg, Attila Gyenesei, Ferenc Jakab                                                                                                                                                                                                                                                                                                                                                                                                                                                   |
| EPI_ISL_436099, EPI_ISL_436101, EPI_ISL_436102, EPI_ISL_436104,                                                                                                                                                                                                | TSGH-CP molecular lab                                                                                                                                                | TSGH-CP molecular lab                                                                                                                                    | Cherng-Lih Perng, Ming-Jr JIAN, Chih-Kai Chang, Jung-Chung Lin, Kuo-Ming Yeh, Chien-Wen Chen, Sheng-Kang Chiu, Hsing-Yi Chung, Shih-Hung Tsai, Kuo-Sheng Hung, Tien-Yao Chang, Feng-Yee Chang, Hung-Sheng Shang                                                                                                                                                                                                                                                                                                                                |









|                                                                                                                                                                                                                                                                                                                                                                                                                                                                                                                                                                                                                                                                                                                                                                                                                |                                                                                     |                                                                                                                                                                                                                                                               |                                                                                                                                                                                                                                                                                                                                                                                                                                                                                                                                                                                                                                                                                                                                                                                                                                                                                                                                                                                            |                                                                                                                                                                                                                                                                                                                                                                                                           |
|----------------------------------------------------------------------------------------------------------------------------------------------------------------------------------------------------------------------------------------------------------------------------------------------------------------------------------------------------------------------------------------------------------------------------------------------------------------------------------------------------------------------------------------------------------------------------------------------------------------------------------------------------------------------------------------------------------------------------------------------------------------------------------------------------------------|-------------------------------------------------------------------------------------|---------------------------------------------------------------------------------------------------------------------------------------------------------------------------------------------------------------------------------------------------------------|--------------------------------------------------------------------------------------------------------------------------------------------------------------------------------------------------------------------------------------------------------------------------------------------------------------------------------------------------------------------------------------------------------------------------------------------------------------------------------------------------------------------------------------------------------------------------------------------------------------------------------------------------------------------------------------------------------------------------------------------------------------------------------------------------------------------------------------------------------------------------------------------------------------------------------------------------------------------------------------------|-----------------------------------------------------------------------------------------------------------------------------------------------------------------------------------------------------------------------------------------------------------------------------------------------------------------------------------------------------------------------------------------------------------|
| EPI_ISL_447543                                                                                                                                                                                                                                                                                                                                                                                                                                                                                                                                                                                                                                                                                                                                                                                                 | Gujarat Biotechnology Research Centre                                               | Gujarat Biotechnology Research Centre                                                                                                                                                                                                                         | Shah, R D Dixit, Snehal Bagatharia, Kamlesh J Upadhyay, Ramesh Pandit, Tejas Shah, Dipeshwari Shewale, Chaitanya Joshi, Madhvi Joshi                                                                                                                                                                                                                                                                                                                                                                                                                                                                                                                                                                                                                                                                                                                                                                                                                                                       |                                                                                                                                                                                                                                                                                                                                                                                                           |
| EPI_ISL_447544                                                                                                                                                                                                                                                                                                                                                                                                                                                                                                                                                                                                                                                                                                                                                                                                 | Gujarat Biotechnology Research Centre                                               | Gujarat Biotechnology Research Centre                                                                                                                                                                                                                         | Pritesh Sabara, Apurvashinh Puvar, Janvi Raval, Monika Gandhi, Pinal Trivedi, Maharshi Pandya, Amit Kanani, Akanksha Verma, Nitin Savaliya, Raghavendra Kumar, Dinesh Kumar, Zuber Saiyed, Dipa Kinariwala, Disha Patel, Binita Aring, Neeta Khandelwal, Geeta Vaghela, Sonia Barve, Bhavesh Modi, Kairavi Joshi, Gaurishankar Shrimali, Nidhi Sood, Pranay Shah, R D Dixit, Snehal Bagatharia, Kamlesh J Upadhyay, Ramesh Pandit, Tejas Shah, Ankit Hinsu, Sharmistha Majumdar, Chaitanya Joshi, Madhvi Joshi                                                                                                                                                                                                                                                                                                                                                                                                                                                                             |                                                                                                                                                                                                                                                                                                                                                                                                           |
| EPI_ISL_447545                                                                                                                                                                                                                                                                                                                                                                                                                                                                                                                                                                                                                                                                                                                                                                                                 | Gujarat Biotechnology Research Centre                                               | Gujarat Biotechnology Research Centre                                                                                                                                                                                                                         | Janvi Raval, Monika Gandhi, Pinal Trivedi, Maharshi Pandya, Amit Kanani, Akanksha Verma, Nitin Savaliya, Raghavendra Kumar, Dinesh Kumar, Zuber Saiyed, Dipa Kinariwala, Disha Patel, Binita Aring, Neeta Khandelwal, Geeta Vaghela, Sonia Barve, Bhavesh Modi, Kairavi Joshi, Gaurishankar Shrimali, Nidhi Sood, Pranay Shah, R D Dixit, Snehal Bagatharia, Kamlesh J Upadhyay, Ramesh Pandit, Tejas Shah, Ankit Hinsu, Pritesh Sabara, Apurvashinh Puvar, Janvi Raval, Priti Panidita, Chaitanya Joshi, Madhvi Joshi                                                                                                                                                                                                                                                                                                                                                                                                                                                                     |                                                                                                                                                                                                                                                                                                                                                                                                           |
| EPI_ISL_447546                                                                                                                                                                                                                                                                                                                                                                                                                                                                                                                                                                                                                                                                                                                                                                                                 | Gujarat Biotechnology Research Centre                                               | Gujarat Biotechnology Research Centre                                                                                                                                                                                                                         | Monika Gandhi, Pinal Trivedi, Maharshi Pandya, Amit Kanani, Akanksha Verma, Nitin Savaliya, Raghavendra Kumar, Dinesh Kumar, Zuber Saiyed, Dipa Kinariwala, Disha Patel, Binita Aring, Neeta Khandelwal, Geeta Vaghela, Sonia Barve, Bhavesh Modi, Kairavi Joshi, Gaurishankar Shrimali, Nidhi Sood, Pranay Shah, R D Dixit, Snehal Bagatharia, Kamlesh J Upadhyay, Ramesh Pandit, Tejas Shah, Ankit Hinsu, Pritesh Sabara, Apurvashinh Puvar, Janvi Raval, Priti Panidita, Chaitanya Joshi, Madhvi Joshi                                                                                                                                                                                                                                                                                                                                                                                                                                                                                  |                                                                                                                                                                                                                                                                                                                                                                                                           |
| EPI_ISL_447548                                                                                                                                                                                                                                                                                                                                                                                                                                                                                                                                                                                                                                                                                                                                                                                                 | GMERS Medical College and Hospital, Gandhinagar                                     | Gujarat Biotechnology Research Centre                                                                                                                                                                                                                         | Maharshi Pandya, Amit Kanani, Akanksha Verma, Nitin Savaliya, Raghavendra Kumar, Dinesh Kumar, Zuber Saiyed, Dipa Kinariwala, Disha Patel, Binita Aring, Neeta Khandelwal, Geeta Vaghela, Sonia Barve, Bhavesh Modi, Kairavi Joshi, Gaurishankar Shrimali, Nidhi Sood, Pranay Shah, R D Dixit, Snehal Bagatharia, Kamlesh J Upadhyay, Ramesh Pandit, Tejas Shah, Ankit Hinsu, Pritesh Sabara, Apurvashinh Puvar, Janvi Raval, Monika Gandhi, Pinal Trivedi, Maharshi Pandya, Amit Kanani, Akanksha Verma, Nitin Savaliya, Raghavendra Kumar, Dinesh Kumar, Zuber Saiyed, Pooja P Doshi, Chaitanya Joshi, Madhvi Joshi                                                                                                                                                                                                                                                                                                                                                                      |                                                                                                                                                                                                                                                                                                                                                                                                           |
| EPI_ISL_447551                                                                                                                                                                                                                                                                                                                                                                                                                                                                                                                                                                                                                                                                                                                                                                                                 | GMERS Medical College and Hospital, Gandhinagar                                     | Gujarat Biotechnology Research Centre                                                                                                                                                                                                                         | Nitin Savaliya, Raghavendra Kumar, Dinesh Kumar, Zuber Saiyed, Dipa Kinariwala, Disha Patel, Binita Aring, Neeta Khandelwal, Geeta Vaghela, Sonia Barve, Bhavesh Modi, Kairavi Joshi, Gaurishankar Shrimali, Nidhi Sood, Pranay Shah, R D Dixit, Snehal Bagatharia, Kamlesh J Upadhyay, Ramesh Pandit, Tejas Shah, Ankit Hinsu, Pritesh Sabara, Apurvashinh Puvar, Janvi Raval, Monika Gandhi, Pinal Trivedi, Maharshi Pandya, Amit Kanani, Akanksha Verma, Nitin Savaliya, Raghavendra Kumar, Dinesh Kumar, Zuber Saiyed, Pooja P Doshi, Chaitanya Joshi, Madhvi Joshi                                                                                                                                                                                                                                                                                                                                                                                                                    |                                                                                                                                                                                                                                                                                                                                                                                                           |
| EPI_ISL_447552                                                                                                                                                                                                                                                                                                                                                                                                                                                                                                                                                                                                                                                                                                                                                                                                 | GMERS Medical College and Hospital, Gandhinagar                                     | Gujarat Biotechnology Research Centre                                                                                                                                                                                                                         | Raghavendra Kumar, Dinesh Kumar, Zuber Saiyed, Dipa Kinariwala, Disha Patel, Binita Aring, Neeta Khandelwal, Geeta Vaghela, Sonia Barve, Bhavesh Modi, Kairavi Joshi, Gaurishankar Shrimali, Nidhi Sood, Pranay Shah, R D Dixit, Snehal Bagatharia, Kamlesh J Upadhyay, Ramesh Pandit, Tejas Shah, Ankit Hinsu, Pritesh Sabara, Apurvashinh Puvar, Janvi Raval, Monika Gandhi, Pinal Trivedi, Maharshi Pandya, Amit Kanani, Akanksha Verma, Nitin Savaliya, Raghavendra Kumar, Dinesh Kumar, Zuber Saiyed, Pooja P Doshi, Chaitanya Joshi, Madhvi Joshi                                                                                                                                                                                                                                                                                                                                                                                                                                    |                                                                                                                                                                                                                                                                                                                                                                                                           |
| EPI_ISL_447553                                                                                                                                                                                                                                                                                                                                                                                                                                                                                                                                                                                                                                                                                                                                                                                                 | GMERS Medical College and Hospital, Gandhinagar                                     | Gujarat Biotechnology Research Centre                                                                                                                                                                                                                         | Dinesh Kumar, Zuber Saiyed, Dipa Kinariwala, Disha Patel, Binita Aring, Neeta Khandelwal, Geeta Vaghela, Sonia Barve, Bhavesh Modi, Kairavi Joshi, Gaurishankar Shrimali, Nidhi Sood, Pranay Shah, R D Dixit, Snehal Bagatharia, Kamlesh J Upadhyay, Ramesh Pandit, Tejas Shah, Ankit Hinsu, Pritesh Sabara, Apurvashinh Puvar, Janvi Raval, Monika Gandhi, Pinal Trivedi, Maharshi Pandya, Amit Kanani, Akanksha Verma, Nitin Savaliya, Raghavendra Kumar, Dinesh Kumar, Zuber Saiyed, Pooja P Doshi, Chaitanya Joshi, Madhvi Joshi                                                                                                                                                                                                                                                                                                                                                                                                                                                       |                                                                                                                                                                                                                                                                                                                                                                                                           |
| EPI_ISL_447554                                                                                                                                                                                                                                                                                                                                                                                                                                                                                                                                                                                                                                                                                                                                                                                                 | GMERS Medical College and Hospital, Gandhinagar                                     | Gujarat Biotechnology Research Centre                                                                                                                                                                                                                         | Zuber Saiyed, Dipa Kinariwala, Disha Patel, Binita Aring, Neeta Khandelwal, Geeta Vaghela, Sonia Barve, Bhavesh Modi, Kairavi Joshi, Gaurishankar Shrimali, Nidhi Sood, Pranay Shah, R D Dixit, Snehal Bagatharia, Kamlesh J Upadhyay, Ramesh Pandit, Tejas Shah, Ankit Hinsu, Pritesh Sabara, Apurvashinh Puvar, Janvi Raval, Monika Gandhi, Pinal Trivedi, Maharshi Pandya, Amit Kanani, Akanksha Verma, Nitin Savaliya, Raghavendra Kumar, Dinesh Kumar, Zuber Saiyed, Pooja P Doshi, Chaitanya Joshi, Madhvi Joshi                                                                                                                                                                                                                                                                                                                                                                                                                                                                     |                                                                                                                                                                                                                                                                                                                                                                                                           |
| EPI_ISL_447555                                                                                                                                                                                                                                                                                                                                                                                                                                                                                                                                                                                                                                                                                                                                                                                                 | GMERS Medical College and Hospital, Gandhinagar                                     | Gujarat Biotechnology Research Centre                                                                                                                                                                                                                         | Dipa Kinariwala, Disha Patel, Binita Aring, Neeta Khandelwal, Geeta Vaghela, Sonia Barve, Bhavesh Modi, Kairavi Joshi, Gaurishankar Shrimali, Nidhi Sood, Pranay Shah, R D Dixit, Snehal Bagatharia, Kamlesh J Upadhyay, Ramesh Pandit, Tejas Shah, Ankit Hinsu, Pritesh Sabara, Apurvashinh Puvar, Janvi Raval, Monika Gandhi, Pinal Trivedi, Maharshi Pandya, Amit Kanani, Akanksha Verma, Nitin Savaliya, Raghavendra Kumar, Dinesh Kumar, Zuber Saiyed, Pooja P Doshi, Chaitanya Joshi, Madhvi Joshi                                                                                                                                                                                                                                                                                                                                                                                                                                                                                   |                                                                                                                                                                                                                                                                                                                                                                                                           |
| EPI_ISL_447577                                                                                                                                                                                                                                                                                                                                                                                                                                                                                                                                                                                                                                                                                                                                                                                                 | CSIR-Centre for Cellular and Molecular Biology                                      | CSIR-Centre for Cellular and Molecular Biology                                                                                                                                                                                                                | Namami Gaur, Sakshi Shambhavi, Lamuk Zaveri, Shagufta Khan, Tulasi Nagabandi, Purushotham Vodnala, Payel Mukherjee, Sofia Banu, Priya Singh, Dhiviya Vedagiri, Divya Gupta, Vishal Sah, Santosh Kumar Kuncha, Krishnan Harinivas Harshan, Archana Bharadwaj Siva, Karthik Bharadwaj Tallapaka, Rakesh K Mishra, Divya Tej Sowpati                                                                                                                                                                                                                                                                                                                                                                                                                                                                                                                                                                                                                                                          |                                                                                                                                                                                                                                                                                                                                                                                                           |
| EPI_ISL_447592, EPI_ISL_447593                                                                                                                                                                                                                                                                                                                                                                                                                                                                                                                                                                                                                                                                                                                                                                                 | TSGH-CP molecular lab                                                               | TSGH-CP molecular lab                                                                                                                                                                                                                                         | Cherng-Lih Perng, Ming-Jr JIAN, Chih-Kai Chang, Jung-Chung Lin, Kuo-Ming Yeh, Chien-Wen Chen, Sheng-Kang Chiu, Hsing-Yi Chung, Shih-Hung Tsai, Kuo-Sheng Hung, Tien-Yao Chang, Feng-Yee Chang, Hung-Sheng Shang                                                                                                                                                                                                                                                                                                                                                                                                                                                                                                                                                                                                                                                                                                                                                                            |                                                                                                                                                                                                                                                                                                                                                                                                           |
| EPI_ISL_447614, EPI_ISL_447615, EPI_ISL_447616, EPI_ISL_447617, EPI_ISL_447618, EPI_ISL_447619, EPI_ISL_447620, EPI_ISL_447621, EPI_ISL_447622                                                                                                                                                                                                                                                                                                                                                                                                                                                                                                                                                                                                                                                                 | Department of Laboratory Medicine, National Taiwan University Hospital              | Microbial Genomics Core Lab, National Taiwan University Centers of Genomic and Precision Medicine                                                                                                                                                             | Shiou-Hwei Yeh, You-Yu Lin, Ya-Yun Lai, Chiao-Ling Li, Shan-Chwen Chang, Pei-Jer Chen, Sui-Yuan Chang                                                                                                                                                                                                                                                                                                                                                                                                                                                                                                                                                                                                                                                                                                                                                                                                                                                                                      |                                                                                                                                                                                                                                                                                                                                                                                                           |
| EPI_ISL_447734, EPI_ISL_447735, EPI_ISL_447736, EPI_ISL_447738, EPI_ISL_447739, EPI_ISL_447740, EPI_ISL_447741, EPI_ISL_447742, EPI_ISL_447743, EPI_ISL_447744, EPI_ISL_447745, EPI_ISL_447746, EPI_ISL_447747, EPI_ISL_447748, EPI_ISL_447750, EPI_ISL_447751                                                                                                                                                                                                                                                                                                                                                                                                                                                                                                                                                 | see above                                                                           | Grupo de Investigaciones Microbiológicas-UR (GIMUR), Departamento de Biología, Facultad de Ciencias Naturales, Universidad del Rosario, Bogotá, Colombia Instituto Nacional de Salud, Bogotá, Colombia Icahn School of Medicine at Mount Sinai, New York, USA | Juan David Ramirez, Carolina Florez, Marina Muñoz, Carolina Hernandez, Adriana Castillo, Sergio Castañeda, Nathalia Ballesteros, David Martínez, Laura Vega, Jesús E. Jaimes, Sergio Gomez, Angelica Rico, Lisseth Pardo, Esther C. Barros, Martha L. Ospina, Anibal A. Teherán, Ana S. Gonzalez-Reiche, Matthew M. Hernandez, Emilia Mia Sordillo, Viviana Simon, Harm van Bakel, Alberto Paniz-Mondolfi                                                                                                                                                                                                                                                                                                                                                                                                                                                                                                                                                                                  |                                                                                                                                                                                                                                                                                                                                                                                                           |
| EPI_ISL_447755, EPI_ISL_447756, EPI_ISL_447757, EPI_ISL_447758, EPI_ISL_447760, EPI_ISL_447761, EPI_ISL_447762, EPI_ISL_447763, EPI_ISL_447765, EPI_ISL_447766, EPI_ISL_447767, EPI_ISL_447768, EPI_ISL_447769, EPI_ISL_447771, EPI_ISL_447772, EPI_ISL_447773, EPI_ISL_447774, EPI_ISL_447775, EPI_ISL_447777, EPI_ISL_447778, EPI_ISL_447780, EPI_ISL_447781, EPI_ISL_447782, EPI_ISL_447783, EPI_ISL_447784, EPI_ISL_447786, EPI_ISL_447787, EPI_ISL_447789, EPI_ISL_447791, EPI_ISL_447792, EPI_ISL_447793, EPI_ISL_447794, EPI_ISL_447795, EPI_ISL_447796, EPI_ISL_447797, EPI_ISL_447800, EPI_ISL_447802, EPI_ISL_447803, EPI_ISL_447804, EPI_ISL_447805, EPI_ISL_447806, EPI_ISL_447807, EPI_ISL_447808, EPI_ISL_447809, EPI_ISL_447810, EPI_ISL_447812, EPI_ISL_447813, EPI_ISL_447816, EPI_ISL_447817 | see above                                                                           | Instituto Nacional de Salud, Bogotá, Colombia                                                                                                                                                                                                                 | Grupo de Investigaciones Microbiológicas-UR (GIMUR), Departamento de Biología, Facultad de Ciencias Naturales, Universidad del Rosario, Bogotá, Colombia Instituto Nacional de Salud, Bogotá, Colombia Icahn School of Medicine at Mount Sinai, New York, USA                                                                                                                                                                                                                                                                                                                                                                                                                                                                                                                                                                                                                                                                                                                              | Juan David Ramirez, Carolina Florez, Marina Muñoz, Carolina Hernandez, Adriana Castillo, Sergio Castañeda, Nathalia Ballesteros, David Martínez, Laura Vega, Jesús E. Jaimes, Sergio Gomez, Angelica Rico, Lisseth Pardo, Esther C. Barros, Martha L. Ospina, Anibal A. Teherán, Ana S. Gonzalez-Reiche, Matthew M. Hernandez, Emilia Mia Sordillo, Viviana Simon, Harm van Bakel, Alberto Paniz-Mondolfi |
| EPI_ISL_447854                                                                                                                                                                                                                                                                                                                                                                                                                                                                                                                                                                                                                                                                                                                                                                                                 | CSIR-Centre for Cellular and Molecular Biology                                      | CSIR-Centre for Cellular and Molecular Biology                                                                                                                                                                                                                | Payel Mukherjee, Sofia Banu, Priya Singh, Dhiviya Vedagiri, Divya Gupta, Vishal Sah, Santosh Kumar Kuncha, Krishnan Harinivas Harshan, Archana Bharadwaj Siva, Karthik Bharadwaj Tallapaka, Shagufta Khan, Lamuk Zaveri, Namami Gaur, Sakshi Shambhavi, Tulasi Nagabandi, Purushotham Vodnala, Payel Mukherjee, Sofia Banu, Priya Singh, Dhiviya Vedagiri, Divya Gupta, Vishal Sah, Santosh Kumar Kuncha, Krishnan Harinivas Harshan, Archana Bharadwaj Siva, Karthik Bharadwaj Tallapaka, Rakesh K Mishra, Divya Tej Sowpati                                                                                                                                                                                                                                                                                                                                                                                                                                                              |                                                                                                                                                                                                                                                                                                                                                                                                           |
| EPI_ISL_447855                                                                                                                                                                                                                                                                                                                                                                                                                                                                                                                                                                                                                                                                                                                                                                                                 | CSIR-Centre for Cellular and Molecular Biology                                      | CSIR-Centre for Cellular and Molecular Biology                                                                                                                                                                                                                | Lamuk Zaveri, Shagufta Khan, Namami Gaur, Sakshi Shambhavi, Tulasi Nagabandi, Purushotham Vodnala, Payel Mukherjee, Sofia Banu, Priya Singh, Dhiviya Vedagiri, Divya Gupta, Vishal Sah, Santosh Kumar Kuncha, Krishnan Harinivas Harshan, Archana Bharadwaj Siva, Karthik Bharadwaj Tallapaka, Rakesh K Mishra, Divya Tej Sowpati                                                                                                                                                                                                                                                                                                                                                                                                                                                                                                                                                                                                                                                          |                                                                                                                                                                                                                                                                                                                                                                                                           |
| EPI_ISL_448222                                                                                                                                                                                                                                                                                                                                                                                                                                                                                                                                                                                                                                                                                                                                                                                                 | Pasteur Institute Ho Chi Minh City                                                  | National Key Laboratory of Gene Technology, Institute of Biotechnology, Vietnam Academy of Science and Technology                                                                                                                                             | Le Tung Lam, Nguyen Trung Hieu, Nguyen Hong Trang, Ho Thi Thuong, Nguyen Thi Ngoc Thao, Huynh Thi Kim Loan, Luu Thuy Tien, Tran Huy Linh, Pham Duy Quang, Luong Chan Quang, Cao Minh Trang, Nguyen Vu Thuong, Hoang Ha, Chu Hoang Ha, Chu Trong Lan, Trong Nam Hai                                                                                                                                                                                                                                                                                                                                                                                                                                                                                                                                                                                                                                                                                                                         |                                                                                                                                                                                                                                                                                                                                                                                                           |
| EPI_ISL_450241, EPI_ISL_450242, EPI_ISL_450243, EPI_ISL_450244, EPI_ISL_450245, EPI_ISL_450248, EPI_ISL_450249, EPI_ISL_450250, EPI_ISL_450251, EPI_ISL_450252, EPI_ISL_450258, EPI_ISL_450259, EPI_ISL_450260, EPI_ISL_450261, EPI_ISL_450262, EPI_ISL_450263, EPI_ISL_450264, EPI_ISL_450265, EPI_ISL_450266, EPI_ISL_450267, EPI_ISL_450271, EPI_ISL_450272, EPI_ISL_450273, EPI_ISL_450274, EPI_ISL_450275, EPI_ISL_450276, EPI_ISL_450277, EPI_ISL_450278, EPI_ISL_450279, EPI_ISL_450280, EPI_ISL_450281, EPI_ISL_450282, EPI_ISL_450283, EPI_ISL_450284, EPI_ISL_450285, EPI_ISL_450286, EPI_ISL_450287, EPI_ISL_450288, EPI_ISL_450289, EPI_ISL_450290, EPI_ISL_450291, EPI_ISL_450292, EPI_ISL_450293                                                                                                 | see above                                                                           | WHO National Influenza Centre Russian Federation                                                                                                                                                                                                              | WHO National Influenza Centre Russian Federation                                                                                                                                                                                                                                                                                                                                                                                                                                                                                                                                                                                                                                                                                                                                                                                                                                                                                                                                           | Andrey Komissarov, Artem Fadeev, Mariia Sergeeva, Anna Ivanova, Tamila Mусаeva, Ksenia Komissarova, Mariia Timofeeva, Veronica Eder, Mariia Pisareva, Daria Danilenko                                                                                                                                                                                                                                     |
| EPI_ISL_450321                                                                                                                                                                                                                                                                                                                                                                                                                                                                                                                                                                                                                                                                                                                                                                                                 | NIV Pune                                                                            | CSIR-Centre for Cellular and Molecular Biology                                                                                                                                                                                                                | Dr V A Potdar, Dr ML Choudhary, Dr Priya Abraham, V. Vipat, S. Jadhav, U. Saha, H. Kengle, A. Awhale, A. Jagtap, A. Gondhalkar, V. Malik, N. Srivastava, S. Digraskar, P. Malsane, S. Hundekar, K. Patel, Yogesh Balakartik, M. Kakade, S. Jadhav, R. Gunjkar, V. Awtade, S. Bhorekar, P. Shinde, S. Salve, B. Minhas S. Bharadwaj, H. Kaushal Y. Gurav, S. Tomar, Payel Mukherjee, Sofia Banu, Priya Singh, Dhiviya Vedagiri, Divya Gupta, Vishal Sah, Santosh Kumar Kuncha, Krishnan Harinivas Harshan, Archana Bharadwaj Siva, Karthik Bharadwaj Tallapaka, Shagufta Khan, Lamuk Zaveri, Namami Gaur, Sakshi Shambhavi, Tulasi Nagabandi, Purushotham Vodnala, G. Aditya Kumar, Koushick Sivakumar, Pooja Ramesh Gupta, Rajan Kumar Jha, Shradha Vijay Lahoti, Deepak Kumar, Devi Prasad Vijayashankara, Disha Nanda, Divya Das, Jotin Gogoi, Manish                                                                                                                                    |                                                                                                                                                                                                                                                                                                                                                                                                           |
| EPI_ISL_450322                                                                                                                                                                                                                                                                                                                                                                                                                                                                                                                                                                                                                                                                                                                                                                                                 | NIV Pune                                                                            | CSIR-Centre for Cellular and Molecular Biology                                                                                                                                                                                                                | Dr V A Potdar, Dr ML Choudhary, Dr Priya Abraham, V. Vipat, S. Jadhav, U. Saha, H. Kengle, A. Awhale, A. Jagtap, A. Gondhalkar, V. Malik, N. Srivastava, S. Digraskar, P. Malsane, S. Hundekar, K. Patel, Yogesh Balakartik, M. Kakade, S. Jadhav, R. Gunjkar, V. Awtade, S. Bhorekar, P. Shinde, S. Salve, B. Minhas S. Bharadwaj, H. Kaushal Y. Gurav, S. Tomar, Payel Mukherjee, Priya Singh, Dhiviya Vedagiri, Divya Gupta, Vishal Sah, Santosh Kumar Kuncha, Krishnan Harinivas Harshan, Archana Bharadwaj Siva, Karthik Bharadwaj Tallapaka, Shagufta Khan, Lamuk Zaveri, Namami Gaur, Sakshi Shambhavi, Tulasi Nagabandi, Purushotham Vodnala, Disha Nanda, Divya Das, Jotin Gogoi, Manish Bhattacharjee, Ravi Prasad Mukku, Renu Sudhakar, Somesh Gorde, Gangumala Srinivas Reddy, Sujoy Deb, Swati Bayyana, Zeba Rizvi, Rakesh K Mishra                                                                                                                                           |                                                                                                                                                                                                                                                                                                                                                                                                           |
| EPI_ISL_450323                                                                                                                                                                                                                                                                                                                                                                                                                                                                                                                                                                                                                                                                                                                                                                                                 | NIV Pune                                                                            | CSIR-Centre for Cellular and Molecular Biology                                                                                                                                                                                                                | Dr V A Potdar, Dr ML Choudhary, Dr Priya Abraham, V. Vipat, S. Jadhav, U. Saha, H. Kengle, A. Awhale, A. Jagtap, A. Gondhalkar, V. Malik, N. Srivastava, S. Digraskar, P. Malsane, S. Hundekar, K. Patel, Yogesh Balakartik, M. Kakade, S. Jadhav, R. Gunjkar, V. Awtade, S. Bhorekar, P. Shinde, S. Salve, B. Minhas S. Bharadwaj, H. Kaushal Y. Gurav, S. Tomar, Payel Mukherjee, Sofia Banu, Priya Singh, Dhiviya Vedagiri, Divya Gupta, Vishal Sah, Santosh Kumar Kuncha, Krishnan Harinivas Harshan, Archana Bharadwaj Siva, Karthik Bharadwaj Tallapaka, Shagufta Khan, Lamuk Zaveri, Namami Gaur, Sakshi Shambhavi, Tulasi Nagabandi, Purushotham Vodnala, G. Aditya Kumar, Koushick Sivakumar, Pooja Ramesh Gupta, Rajan Kumar Jha, Shradha Vijay Lahoti, Deepak Kumar, Devi Prasad Vijayashankara, Disha Nanda, Divya Das, Jotin Gogoi, Manish                                                                                                                                    |                                                                                                                                                                                                                                                                                                                                                                                                           |
| EPI_ISL_450324                                                                                                                                                                                                                                                                                                                                                                                                                                                                                                                                                                                                                                                                                                                                                                                                 | NIV Pune                                                                            | CSIR-Centre for Cellular and Molecular Biology                                                                                                                                                                                                                | Dr V A Potdar, Dr ML Choudhary, Dr Priya Abraham, V. Vipat, S. Jadhav, U. Saha, H. Kengle, A. Awhale, A. Jagtap, A. Gondhalkar, V. Malik, N. Srivastava, S. Digraskar, P. Malsane, S. Hundekar, K. Patel, Yogesh Balakartik, M. Kakade, S. Jadhav, R. Gunjkar, V. Awtade, S. Bhorekar, P. Shinde, S. Salve, B. Minhas S. Bharadwaj, H. Kaushal Y. Gurav, S. Tomar, Payel Mukherjee, Priya Singh, Dhiviya Vedagiri, Divya Gupta, Vishal Sah, Santosh Kumar Kuncha, Krishnan Harinivas Harshan, Archana Bharadwaj Siva, Karthik Bharadwaj Tallapaka, Shagufta Khan, Lamuk Zaveri, Namami Gaur, Sakshi Shambhavi, Tulasi Nagabandi, Purushotham Vodnala, Disha Nanda, Divya Das, Jotin Gogoi, Manish Bhattacharjee, Ravi Prasad Mukku, Renu Sudhakar, Somesh Gorde, Gangumala Srinivas Reddy, Sujoy Deb, Swati Bayyana, Zeba Rizvi, Rakesh K Mishra                                                                                                                                           |                                                                                                                                                                                                                                                                                                                                                                                                           |
| EPI_ISL_450325                                                                                                                                                                                                                                                                                                                                                                                                                                                                                                                                                                                                                                                                                                                                                                                                 | NIV Pune                                                                            | CSIR-Centre for Cellular and Molecular Biology                                                                                                                                                                                                                | Dr V A Potdar, Dr ML Choudhary, Dr Priya Abraham, V. Vipat, S. Jadhav, U. Saha, H. Kengle, A. Awhale, A. Jagtap, A. Gondhalkar, V. Malik, N. Srivastava, S. Digraskar, P. Malsane, S. Hundekar, K. Patel, Yogesh Balakartik, M. Kakade, S. Jadhav, R. Gunjkar, V. Awtade, S. Bhorekar, P. Shinde, S. Salve, B. Minhas S. Bharadwaj, H. Kaushal Y. Gurav, S. Tomar, Payel Mukherjee, Priya Singh, Dhiviya Vedagiri, Divya Gupta, Vishal Sah, Santosh Kumar Kuncha, Krishnan Harinivas Harshan, Archana Bharadwaj Siva, Karthik Bharadwaj Tallapaka, Shagufta Khan, Lamuk Zaveri, Namami Gaur, Sakshi Shambhavi, Tulasi Nagabandi, Purushotham Vodnala, G. Aditya Kumar, Koushick Sivakumar, Pooja Ramesh Gupta, Rajan Kumar Jha, Shradha Vijay Lahoti, Deepak Kumar, Devi Prasad Vijayashankara, Disha Nanda, Divya Das, Jotin Gogoi, Manish Bhattacharjee, Ravi Prasad Mukku, Renu Sudhakar, Somesh Gorde, Gangumala Srinivas Reddy, Sujoy Deb, Swati Bayyana, Zeba Rizvi, Rakesh K Mishra |                                                                                                                                                                                                                                                                                                                                                                                                           |
| EPI_ISL_450341                                                                                                                                                                                                                                                                                                                                                                                                                                                                                                                                                                                                                                                                                                                                                                                                 | Bangladesh Institute of Tropical & Infectious Diseases, COVID-19 Testing Laboratory | Basic and Applied Research on Jute Project                                                                                                                                                                                                                    | Md. Sabbir Hossain, Rasel Ahmed, Shah Md Tamim Kabir, Emdadul Mannan Emdad, Md. Nazmul Haq Rony, Eaftekar Ahmed Rana, Paritous Kumar Biswas, M A Hassan Chowdhury, Md. Shakeel Ahmed, Md. Samiul Alam, Md. Monjurul Alam, Md. Sharifur Rahman, A S M Anwarul Huq, Md. Shahidul Islam, Goutam Buddha Das, AMAM Zonaid Siddiki                                                                                                                                                                                                                                                                                                                                                                                                                                                                                                                                                                                                                                                               |                                                                                                                                                                                                                                                                                                                                                                                                           |
| EPI_ISL_450343                                                                                                                                                                                                                                                                                                                                                                                                                                                                                                                                                                                                                                                                                                                                                                                                 | Bangladesh Institute of Tropical & Infectious Diseases, COVID-19 Testing Laboratory | Basic and Applied Research on Jute Project                                                                                                                                                                                                                    | Md. Sabbir Hossain, Rasel Ahmed, Shah Md Tamim Kabir, Emdadul Mannan Emdad, Md. Nazmul Haq Rony, Eaftekar Ahmed Rana, Paritous Kumar Biswas, M A Hassan Chowdhury, Md. Shakeel Ahmed, Md. Samiul Alam, Md. Monjurul Alam, Md. Sharifur Rahman, A S M Anwarul Huq, Md. Shahidul Islam, Goutam Buddha Das, AMAM Zonaid Siddiki                                                                                                                                                                                                                                                                                                                                                                                                                                                                                                                                                                                                                                                               |                                                                                                                                                                                                                                                                                                                                                                                                           |
| EPI_ISL_450508, EPI_ISL_450509, EPI_ISL_450511, EPI_ISL_450512, EPI_ISL_450515                                                                                                                                                                                                                                                                                                                                                                                                                                                                                                                                                                                                                                                                                                                                 | Rafik Hariri University Hospital                                                    | Rafik Hariri University Hospital                                                                                                                                                                                                                              | Rita Feghali                                                                                                                                                                                                                                                                                                                                                                                                                                                                                                                                                                                                                                                                                                                                                                                                                                                                                                                                                                               |                                                                                                                                                                                                                                                                                                                                                                                                           |
| EPI_ISL_450724, EPI_ISL_450725, EPI_ISL_450726, EPI_ISL_450727, EPI_ISL_450728, EPI_ISL_450729, EPI_ISL_450730                                                                                                                                                                                                                                                                                                                                                                                                                                                                                                                                                                                                                                                                                                 | Hospital AZ Rivierenland                                                            | Institute of Tropical Medicine                                                                                                                                                                                                                                | Philippe Selhorst, Colin Anthony                                                                                                                                                                                                                                                                                                                                                                                                                                                                                                                                                                                                                                                                                                                                                                                                                                                                                                                                                           |                                                                                                                                                                                                                                                                                                                                                                                                           |
| EPI_ISL_450746                                                                                                                                                                                                                                                                                                                                                                                                                                                                                                                                                                                                                                                                                                                                                                                                 | Laboratory of Molecular Biology, Diagnostyka sp. z o.o.                             | Laboratory of Recombinant Vaccines                                                                                                                                                                                                                            | Lukasz Rabalski, Anna Piotrowska-Mietelska, Maciej Kosinski, Boguslaw Szewczyk, Krystyna Bienkowska-Szewczyk                                                                                                                                                                                                                                                                                                                                                                                                                                                                                                                                                                                                                                                                                                                                                                                                                                                                               |                                                                                                                                                                                                                                                                                                                                                                                                           |

|                                                                                                                                                                                                                                                                                                                                                                                                                                                                                                                                                                                                                                                                                                                                                                                                                                                                                                                |                                                                                                                                      |                                                                                                                                                                                                                                                                  |                                                                                                                                                                                                                                                                                                                                                                                                                                                                                |
|----------------------------------------------------------------------------------------------------------------------------------------------------------------------------------------------------------------------------------------------------------------------------------------------------------------------------------------------------------------------------------------------------------------------------------------------------------------------------------------------------------------------------------------------------------------------------------------------------------------------------------------------------------------------------------------------------------------------------------------------------------------------------------------------------------------------------------------------------------------------------------------------------------------|--------------------------------------------------------------------------------------------------------------------------------------|------------------------------------------------------------------------------------------------------------------------------------------------------------------------------------------------------------------------------------------------------------------|--------------------------------------------------------------------------------------------------------------------------------------------------------------------------------------------------------------------------------------------------------------------------------------------------------------------------------------------------------------------------------------------------------------------------------------------------------------------------------|
| EPI_ISL_450781                                                                                                                                                                                                                                                                                                                                                                                                                                                                                                                                                                                                                                                                                                                                                                                                                                                                                                 | Government Medical College-Bhavnagar                                                                                                 | Gujarat Biotechnology Research Centre                                                                                                                                                                                                                            | Kairavi Desai, Saklain Malek, Shirish Patel, Ramesh Pandit, Tejas Shah, Ankit Hinsu, Pritesh Sabara, Apurvasinh Puvar, Janvi Raval, Zarna Patel, Monika Gandhi, Pinal Trivedi, Maharshi Pandya, Amit Kanani, Nidhi Patel, Nitin Savaliya, Raghavendra Kumar, Dinesh Kumar, Zuber Saiyed, Komal Patel, Labdhi Pandya, Snehal Bagatharia, Bhavesh Modi, Gaurishankar Shrimali, R D Dixit, A M Kadri, Akanksha Verma, Chaitanya Joshi, Madhvi Joshi                               |
| EPI_ISL_450783                                                                                                                                                                                                                                                                                                                                                                                                                                                                                                                                                                                                                                                                                                                                                                                                                                                                                                 | Government Medical College-Bhavnagar                                                                                                 | Gujarat Biotechnology Research Centre                                                                                                                                                                                                                            | Shirish Patel, Kairavi Desai, Saklain Malek, Ankit Hinsu, Pritesh Sabara, Apurvasinh Puvar, Janvi Raval, Zarna Patel, Monika Gandhi, Pinal Trivedi, Maharshi Pandya, Amit Kanani, Nidhi Patel, Nitin Savaliya, Raghavendra Kumar, Dinesh Kumar, Zuber Saiyed, Komal Patel, Labdhi Pandya, Snehal Bagatharia, Ramesh Pandit, Tejas Shah, Bhavesh Modi, Gaurishankar Shrimali, R D Dixit, A M Kadri, Neha Rajpara, Chaitanya Joshi, Madhvi Joshi                                 |
| EPI_ISL_450784                                                                                                                                                                                                                                                                                                                                                                                                                                                                                                                                                                                                                                                                                                                                                                                                                                                                                                 | Government Medical College-Bhavnagar                                                                                                 | Gujarat Biotechnology Research Centre                                                                                                                                                                                                                            | Zarna Patel, Ramesh Pandit, Tejas Shah, Ankit Hinsu, Pritesh Sabara, Apurvasinh Puvar, Janvi Raval, Monika Gandhi, Pinal Trivedi, Maharshi Pandya, Amit Kanani, Nidhi Patel, Nitin Savaliya, Raghavendra Kumar, Dinesh Kumar, Zuber Saiyed, Komal Patel, Labdhi Pandya, Snehal Bagatharia, Kairavi Desai, Saklain Malek, Shirish Patel, Ramesh Pandit, Gaurishankar Shrimali, R D Dixit, A M Kadri, Afzal Ansari, Chaitanya Joshi, Madhvi Joshi                                |
| EPI_ISL_450785                                                                                                                                                                                                                                                                                                                                                                                                                                                                                                                                                                                                                                                                                                                                                                                                                                                                                                 | Pandit Deendayal Upadhyay Government Medical College, Rajkot                                                                         | Gujarat Biotechnology Research Centre                                                                                                                                                                                                                            | Prakash Modi, Sejul Antala, Manish Pattani, Apurvasinh Puvar, Janvi Raval, Zarna Patel, Monika Gandhi, Pinal Trivedi, Maharshi Pandya, Amit Kanani, Nidhi Patel, Nitin Savaliya, Raghavendra Kumar, Dinesh Kumar, Zuber Saiyed, Komal Patel, Labdhi Pandya, Snehal Bagatharia, Ramesh Pandit, Tejas Shah, Ankit Hinsu, Pritesh Sabara, Bhavesh Modi, Gaurishankar Shrimali, R D Dixit, A M Kadri, Neelam Nathani, Chaitanya Joshi, Madhvi Joshi                                |
| EPI_ISL_450786                                                                                                                                                                                                                                                                                                                                                                                                                                                                                                                                                                                                                                                                                                                                                                                                                                                                                                 | Pandit Deendayal Upadhyay Government Medical College, Rajkot                                                                         | Gujarat Biotechnology Research Centre                                                                                                                                                                                                                            | Sejul Antala, Manish Pattani, Prakash Modi, Janvi Raval, Zarna Patel, Monika Gandhi, Pinal Trivedi, Maharshi Pandya, Amit Kanani, Nidhi Patel, Nitin Savaliya, Raghavendra Kumar, Dinesh Kumar, Zuber Saiyed, Komal Patel, Labdhi Pandya, Snehal Bagatharia, Ramesh Pandit, Tejas Shah, Ankit Hinsu, Pritesh Sabara, Apurvasinh Puvar, Bhavesh Modi, Gaurishankar Shrimali, R D Dixit, A M Kadri, Armi Chaudhari, Chaitanya Joshi, Madhvi Joshi                                |
| EPI_ISL_450788                                                                                                                                                                                                                                                                                                                                                                                                                                                                                                                                                                                                                                                                                                                                                                                                                                                                                                 | Pandit Deendayal Upadhyay Government Medical College, Rajkot                                                                         | Gujarat Biotechnology Research Centre                                                                                                                                                                                                                            | Zarna Patel, Tejas Shah, Ankit Hinsu, Pritesh Sabara, Apurvasinh Puvar, Janvi Raval, Monika Gandhi, Pinal Trivedi, Maharshi Pandya, Amit Kanani, Nidhi Patel, Nitin Savaliya, Raghavendra Kumar, Dinesh Kumar, Zuber Saiyed, Komal Patel, Labdhi Pandya, Snehal Bagatharia, Prakash Modi, Sejul Antala, Manish Pattani, Ramesh Pandit, Tejas Shah, Ankit Hinsu, Bhavesh Modi, Gaurishankar Shrimali, R D Dixit, A M Kadri, Camellia Chakraborty, Chaitanya Joshi, Madhvi Joshi |
| EPI_ISL_450789                                                                                                                                                                                                                                                                                                                                                                                                                                                                                                                                                                                                                                                                                                                                                                                                                                                                                                 | Pandit Deendayal Upadhyay Government Medical College, Rajkot                                                                         | Gujarat Biotechnology Research Centre                                                                                                                                                                                                                            | Ankit Hinsu, Pritesh Sabara, Apurvasinh Puvar, Janvi Raval, Zarna Patel, Monika Gandhi, Pinal Trivedi, Maharshi Pandya, Amit Kanani, Nidhi Patel, Nitin Savaliya, Raghavendra Kumar, Dinesh Kumar, Zuber Saiyed, Komal Patel, Labdhi Pandya, Snehal Bagatharia, Prakash Modi, Sejul Antala, Manish Pattani, Ramesh Pandit, Tejas Shah, Ankit Hinsu, Bhavesh Modi, Gaurishankar Shrimali, R D Dixit, A M Kadri, Siddhant Kumar, Chaitanya Joshi, Madhvi Joshi                   |
| EPI_ISL_450790                                                                                                                                                                                                                                                                                                                                                                                                                                                                                                                                                                                                                                                                                                                                                                                                                                                                                                 | Pandit Deendayal Upadhyay Government Medical College, Rajkot                                                                         | Gujarat Biotechnology Research Centre                                                                                                                                                                                                                            | Zarna Patel, Pritesh Sabara, Apurvasinh Puvar, Janvi Raval, Monika Gandhi, Pinal Trivedi, Maharshi Pandya, Amit Kanani, Nidhi Patel, Nitin Savaliya, Raghavendra Kumar, Dinesh Kumar, Zuber Saiyed, Komal Patel, Labdhi Pandya, Snehal Bagatharia, Prakash Modi, Sejul Antala, Manish Pattani, Ramesh Pandit, Tejas Shah, Ankit Hinsu, Bhavesh Modi, Gaurishankar Shrimali, R D Dixit, A M Kadri, Sharmistha Majumdar, Chaitanya Joshi, Madhvi Joshi                           |
| EPI_ISL_450791                                                                                                                                                                                                                                                                                                                                                                                                                                                                                                                                                                                                                                                                                                                                                                                                                                                                                                 | Pandit Deendayal Upadhyay Government Medical College, Rajkot                                                                         | Gujarat Biotechnology Research Centre                                                                                                                                                                                                                            | Zarna Patel, Apurvasinh Puvar, Janvi Raval, Monika Gandhi, Pinal Trivedi, Maharshi Pandya, Amit Kanani, Nidhi Patel, Nitin Savaliya, Raghavendra Kumar, Dinesh Kumar, Zuber Saiyed, Komal Patel, Labdhi Pandya, Snehal Bagatharia, Prakash Modi, Sejul Antala, Manish Pattani, Ramesh Pandit, Tejas Shah, Ankit Hinsu, Pritesh Sabara, Bhavesh Modi, Gaurishankar Shrimali, R D Dixit, A M Kadri, Pooja P Doshi, Chaitanya Joshi, Madhvi Joshi                                 |
| EPI_ISL_450839                                                                                                                                                                                                                                                                                                                                                                                                                                                                                                                                                                                                                                                                                                                                                                                                                                                                                                 | COVID-19 Laboratory Centre for Advanced Research in Sciences (CARS), University of Dhaka, Dhaka-1000, Bangladesh                     | DNA Solution Ltd                                                                                                                                                                                                                                                 | Sharif Akhteruzzaman, Zeba Islam Seraj, Nazmul Ahsan, Md Imdadul Hoque, MA Malek, Shahryar Nabi, Sabrina Moriom Elius, ABM Khademul Islam, Richard Malo, Imran Khan, Abu Sufian, Sabita Rezwana Rahman, Habibul Bari Shozib, Mamun Ahmed, AHM Nurun Nabi, Mohammad Riazul Islam, Md Mizanur Rahman, Md Ismail Hosen, Latiful Bari, Gazi Nurun Nahar, Haseena Khan, M Anwar Hossain.                                                                                            |
| EPI_ISL_450840                                                                                                                                                                                                                                                                                                                                                                                                                                                                                                                                                                                                                                                                                                                                                                                                                                                                                                 | COVID-19 Laboratory                                                                                                                  | DNA Solution Ltd. L-5                                                                                                                                                                                                                                            | Sharif Akhteruzzaman, Zeba Islam Seraj, Nazmul Ahsan, Md Imdadul Hoque, MA Malek, Shahryar Nabi, Sabrina Moriom Elius, ABM Khademul Islam, Richard Malo, Imran Khan, Abu Sufian, Sabita Rezwana Rahman, Habibul Bari Shozib, Mamun Ahmed, AHM Nurun Nabi, Mohammad Riazul Islam, Md Mizanur Rahman, Md Ismail Hosen, Latiful Bari, Gazi Nurun Nahar, Haseena Khan, M Anwar Hossain.                                                                                            |
| EPI_ISL_450841                                                                                                                                                                                                                                                                                                                                                                                                                                                                                                                                                                                                                                                                                                                                                                                                                                                                                                 | COVID-19 Laboratory                                                                                                                  | DNA Solution Ltd                                                                                                                                                                                                                                                 | Sharif Akhteruzzaman, Zeba Islam Seraj, Nazmul Ahsan, Md Imdadul Hoque, MA Malek, Shahryar Nabi, Sabrina Moriom Elius, ABM Khademul Islam, Richard Malo, Imran Khan, Abu Sufian, Sabita Rezwana Rahman, Habibul Bari Shozib, Mamun Ahmed, AHM Nurun Nabi, Mohammad Riazul Islam, Md Mizanur Rahman, Md Ismail Hosen, Latiful Bari, Gazi Nurun Nahar, Haseena Khan, M Anwar Hossain.                                                                                            |
| EPI_ISL_450843                                                                                                                                                                                                                                                                                                                                                                                                                                                                                                                                                                                                                                                                                                                                                                                                                                                                                                 | COVID-19 Laboratory                                                                                                                  | DNA Solution Ltd.                                                                                                                                                                                                                                                | Sharif Akhteruzzaman, Zeba Islam Seraj, Nazmul Ahsan, Md Imdadul Hoque, MA Malek, Shahryar Nabi, Sabrina Moriom Elius, ABM Khademul Islam, Richard Malo, Imran Khan, Abu Sufian, Sabita Rezwana Rahman, Habibul Bari Shozib, Mamun Ahmed, AHM Nurun Nabi, Mohammad Riazul Islam, Md Mizanur Rahman, Md Ismail Hosen, Latiful Bari, Gazi Nurun Nahar, Haseena Khan, M Anwar Hossain.                                                                                            |
| EPI_ISL_451076                                                                                                                                                                                                                                                                                                                                                                                                                                                                                                                                                                                                                                                                                                                                                                                                                                                                                                 | West China Hospital of Sichuan University                                                                                            | State Key Laboratory of Biotherapy of Sichuan University                                                                                                                                                                                                         | Baowen Du, Minjin Wang, Chao Tanga, Chuan Chena, Yongzhao Zhou, Mingxia Yu, Han-Cheng Wei, Weimin Li, Jing-wen Lin, Jia Geng, Binwu Ying, Lu Chen                                                                                                                                                                                                                                                                                                                              |
| EPI_ISL_451149                                                                                                                                                                                                                                                                                                                                                                                                                                                                                                                                                                                                                                                                                                                                                                                                                                                                                                 | M.P Shah Government Medocal college Jamnagar                                                                                         | Gujarat Biotechnology Research Centre                                                                                                                                                                                                                            | Janvi Raval, Zarna Patel, Monika Gandhi, Pinal Trivedi, Maharshi Pandya, Amit Kanani, Nidhi Patel, Nitin Savaliya, Raghavendra Kumar, Dinesh Kumar, Zuber Saiyed, Komal Patel, Labdhi Pandya, Snehal Bagatharia, Ramesh Pandit, Tejas Shah, Ankit Hinsu, Pritesh Sabara, Apurvasinh Puvar, Binita Aring, Bhavesh Modi, Gaurishankar Shrimali, R D Dixit, A M Kadri, Priti Pandita, Chaitanya Joshi, Madhvi Joshi,                                                              |
| EPI_ISL_451150                                                                                                                                                                                                                                                                                                                                                                                                                                                                                                                                                                                                                                                                                                                                                                                                                                                                                                 | M.P Shah Government Medocal college Jamnagar                                                                                         | Gujarat Biotechnology Research Centre                                                                                                                                                                                                                            | Zarna Patel, Monika Gandhi, Pinal Trivedi, Maharshi Pandya, Amit Kanani, Nidhi Patel, Nitin Savaliya, Raghavendra Kumar, Dinesh Kumar, Zuber Saiyed, Komal Patel, Labdhi Pandya, Snehal Bagatharia, Ramesh Pandit, Tejas Shah, Ankit Hinsu, Pritesh Sabara, Apurvasinh Puvar, Binita Aring, Janvi Raval, Bhavesh Modi, Gaurishankar Shrimali, R D Dixit, A M Kadri, Pragya Sharma, Chaitanya Joshi, Madhvi Joshi,                                                              |
| EPI_ISL_451151                                                                                                                                                                                                                                                                                                                                                                                                                                                                                                                                                                                                                                                                                                                                                                                                                                                                                                 | M.P Shah Government Medocal college Jamnagar                                                                                         | Gujarat Biotechnology Research Centre                                                                                                                                                                                                                            | Monika Gandhi, Pinal Trivedi, Maharshi Pandya, Amit Kanani, Nidhi Patel, Nitin Savaliya, Raghavendra Kumar, Dinesh Kumar, Zuber Saiyed, Komal Patel, Labdhi Pandya, Snehal Bagatharia, Ramesh Pandit, Tejas Shah, Ankit Hinsu, Pritesh Sabara, Apurvasinh Puvar, Binita Aring, Janvi Raval, Zarna Patel, Bhavesh Modi, Gaurishankar Shrimali, R D Dixit, A M Kadri, Neha Rajpara, Chaitanya Joshi, Madhvi Joshi,                                                               |
| EPI_ISL_451152                                                                                                                                                                                                                                                                                                                                                                                                                                                                                                                                                                                                                                                                                                                                                                                                                                                                                                 | M.P Shah Government Medocal college Jamnagar                                                                                         | Gujarat Biotechnology Research Centre                                                                                                                                                                                                                            | Pinal Trivedi, Maharshi Pandya, Amit Kanani, Nidhi Patel, Nitin Savaliya, Raghavendra Kumar, Dinesh Kumar, Zuber Saiyed, Komal Patel, Labdhi Pandya, Snehal Bagatharia, Ramesh Pandit, Tejas Shah, Ankit Hinsu, Pritesh Sabara, Apurvasinh Puvar, Binita Aring, Janvi Raval, Zarna Patel, Monika Gandhi, Bhavesh Modi, Gaurishankar Shrimali, R D Dixit, A M Kadri, Afzal Ansari, Chaitanya Joshi, Madhvi Joshi,                                                               |
| EPI_ISL_451157                                                                                                                                                                                                                                                                                                                                                                                                                                                                                                                                                                                                                                                                                                                                                                                                                                                                                                 | Government Medical College, Vadodara                                                                                                 | Gujarat Biotechnology Research Centre                                                                                                                                                                                                                            | Nidhi Patel, Nitin Savaliya, Raghavendra Kumar, Dinesh Kumar, Zuber Saiyed, Komal Patel, Labdhi Pandya, Snehal Bagatharia, Ramesh Pandit, Tejas Shah, Ankit Hinsu, Pritesh Sabara, Apurvasinh Puvar, Janvi Raval, Zarna Patel, Monika Gandhi, Pinal Trivedi, Maharshi Pandya, Manish Pattani, Tanuja Javadekar , Amit Kanani, Bhavesh Modi, Gaurishankar Shrimali, R D Dixit, A M Kadri, Camellia Chakraborty, Chaitanya Joshi, Madhvi Joshi                                   |
| EPI_ISL_451158                                                                                                                                                                                                                                                                                                                                                                                                                                                                                                                                                                                                                                                                                                                                                                                                                                                                                                 | Government Medical College, Vadodara                                                                                                 | Gujarat Biotechnology Research Centre                                                                                                                                                                                                                            | Nitin Savaliya, Raghavendra Kumar, Dinesh Kumar, Zuber Saiyed, Komal Patel, Labdhi Pandya, Snehal Bagatharia, Ramesh Pandit, Tejas Shah, Ankit Hinsu, Pritesh Sabara, Apurvasinh Puvar, Janvi Raval, Zarna Patel, Monika Gandhi, Pinal Trivedi, Maharshi Pandya, Manish Pattani, Tanuja Javadekar , Amit Kanani, Nidhi Patel, Bhavesh Modi, Gaurishankar Shrimali, R D Dixit, A M Kadri, Siddhant Kumar, Chaitanya Joshi, Madhvi Joshi                                         |
| EPI_ISL_451161                                                                                                                                                                                                                                                                                                                                                                                                                                                                                                                                                                                                                                                                                                                                                                                                                                                                                                 | Government Medical College, Vadodara                                                                                                 | Gujarat Biotechnology Research Centre                                                                                                                                                                                                                            | Zuber Saiyed, Komal Patel, Labdhi Pandya, Snehal Bagatharia, Ramesh Pandit, Tejas Shah, Ankit Hinsu, Pritesh Sabara, Apurvasinh Puvar, Janvi Raval, Zarna Patel, Monika Gandhi, Pinal Trivedi, Maharshi Pandya, Manish Pattani, Tanuja Javadekar , Amit Kanani, Nidhi Patel, Nitin Savaliya, Raghavendra Kumar, Dinesh Kumar, Bhavesh Modi, Gaurishankar Shrimali, R D Dixit, A M Kadri, Akanksha Verma, Chaitanya Joshi, Madhvi Joshi                                         |
| EPI_ISL_451162                                                                                                                                                                                                                                                                                                                                                                                                                                                                                                                                                                                                                                                                                                                                                                                                                                                                                                 | Government Medical College, Vadodara                                                                                                 | Gujarat Biotechnology Research Centre                                                                                                                                                                                                                            | Komal Patel, Labdhi Pandya, Snehal Bagatharia, Ramesh Pandit, Tejas Shah, Ankit Hinsu, Pritesh Sabara, Apurvasinh Puvar, Janvi Raval, Zarna Patel, Monika Gandhi, Pinal Trivedi, Maharshi Pandya, Manish Pattani, Tanuja Javadekar , Amit Kanani, Nidhi Patel, Nitin Savaliya, Raghavendra Kumar, Dinesh Kumar, Zuber Saiyed, Bhavesh Modi, Gaurishankar Shrimali, R D Dixit, A M Kadri, Priti Pandita, Chaitanya Joshi, Madhvi Joshi                                          |
| EPI_ISL_451298                                                                                                                                                                                                                                                                                                                                                                                                                                                                                                                                                                                                                                                                                                                                                                                                                                                                                                 | Laboratory of Virology, INMI Lazzaro Spallanzani IRCCS                                                                               | Laboratory of Virology, INMI Lazzaro Spallanzani IRCCS                                                                                                                                                                                                           | Cesare E.M. Gruber, Martina Rueda, Barbara Bartolini, Francesco Messina, Antonino Di Caro, Maria R. Capobianchi, Giuseppe Ippolito                                                                                                                                                                                                                                                                                                                                             |
| EPI_ISL_451299                                                                                                                                                                                                                                                                                                                                                                                                                                                                                                                                                                                                                                                                                                                                                                                                                                                                                                 | Laboratory of Virology, INMI Lazzaro Spallanzani IRCCS                                                                               | Laboratory of Virology, INMI Lazzaro Spallanzani IRCCS                                                                                                                                                                                                           | Martina Rueda, Cesare E.M. Gruber, Barbara Bartolini, Francesco Messina, Antonino Di Caro, Maria R. Capobianchi, Giuseppe Ippolito                                                                                                                                                                                                                                                                                                                                             |
| EPI_ISL_451300                                                                                                                                                                                                                                                                                                                                                                                                                                                                                                                                                                                                                                                                                                                                                                                                                                                                                                 | Laboratory of Virology, INMI Lazzaro Spallanzani IRCCS                                                                               | Laboratory of Virology, INMI Lazzaro Spallanzani IRCCS                                                                                                                                                                                                           | Cesare E.M. Gruber, Martina Rueda, Barbara Bartolini, Francesco Messina, Antonino Di Caro, Maria R. Capobianchi, Giuseppe Ippolito                                                                                                                                                                                                                                                                                                                                             |
| EPI_ISL_451301                                                                                                                                                                                                                                                                                                                                                                                                                                                                                                                                                                                                                                                                                                                                                                                                                                                                                                 | Laboratory of Virology, INMI Lazzaro Spallanzani IRCCS                                                                               | Laboratory of Virology, INMI Lazzaro Spallanzani IRCCS                                                                                                                                                                                                           | Martina Rueda, Cesare E.M. Gruber, Barbara Bartolini, Francesco Messina, Antonino Di Caro, Maria R. Capobianchi, Giuseppe Ippolito                                                                                                                                                                                                                                                                                                                                             |
| EPI_ISL_451302                                                                                                                                                                                                                                                                                                                                                                                                                                                                                                                                                                                                                                                                                                                                                                                                                                                                                                 | Laboratory of Virology, INMI Lazzaro Spallanzani IRCCS                                                                               | Laboratory of Virology, INMI Lazzaro Spallanzani IRCCS                                                                                                                                                                                                           | Cesare E.M. Gruber, Martina Rueda, Barbara Bartolini, Francesco Messina, Antonino Di Caro, Maria R. Capobianchi, Giuseppe Ippolito                                                                                                                                                                                                                                                                                                                                             |
| EPI_ISL_451303                                                                                                                                                                                                                                                                                                                                                                                                                                                                                                                                                                                                                                                                                                                                                                                                                                                                                                 | Laboratory of Virology, INMI Lazzaro Spallanzani IRCCS                                                                               | Laboratory of Virology, INMI Lazzaro Spallanzani IRCCS                                                                                                                                                                                                           | Martina Rueda, Cesare E.M. Gruber, Barbara Bartolini, Francesco Messina, Antonino Di Caro, Maria R. Capobianchi, Giuseppe Ippolito                                                                                                                                                                                                                                                                                                                                             |
| EPI_ISL_451304                                                                                                                                                                                                                                                                                                                                                                                                                                                                                                                                                                                                                                                                                                                                                                                                                                                                                                 | Laboratory of Virology, INMI Lazzaro Spallanzani IRCCS                                                                               | Laboratory of Virology, INMI Lazzaro Spallanzani IRCCS                                                                                                                                                                                                           | Cesare E.M. Gruber, Martina Rueda, Barbara Bartolini, Francesco Messina, Antonino Di Caro, Maria R. Capobianchi, Giuseppe Ippolito                                                                                                                                                                                                                                                                                                                                             |
| EPI_ISL_451306                                                                                                                                                                                                                                                                                                                                                                                                                                                                                                                                                                                                                                                                                                                                                                                                                                                                                                 | Molecular Virology Unit, Fondazione IRCCS Policlinico San Matteo , Pavia                                                             | Laboratory of Virology, INMI Lazzaro Spallanzani IRCCS                                                                                                                                                                                                           | Antonio Piralla, Fausto Baldanti, Martina Rueda, Antonino Di Caro, Maria R. Capobianchi, Cesare E.M. Gruber, Barbara Bartolini                                                                                                                                                                                                                                                                                                                                                 |
| EPI_ISL_451307                                                                                                                                                                                                                                                                                                                                                                                                                                                                                                                                                                                                                                                                                                                                                                                                                                                                                                 | Molecular Virology Unit, Fondazione IRCCS Policlinico San Matteo , Pavia                                                             | Laboratory of Virology, INMI Lazzaro Spallanzani IRCCS                                                                                                                                                                                                           | Fausto Baldanti, Antonio Piralla, Antonino Di Caro, Cesare E.M. Gruber, Martina Rueda, Barbara Bartolini, Maria R. Capobianchi                                                                                                                                                                                                                                                                                                                                                 |
| EPI_ISL_451308                                                                                                                                                                                                                                                                                                                                                                                                                                                                                                                                                                                                                                                                                                                                                                                                                                                                                                 | Molecular Virology Unit, Fondazione IRCCS Policlinico San Matteo , Pavia                                                             | Laboratory of Virology, INMI Lazzaro Spallanzani IRCCS                                                                                                                                                                                                           | Antonio Piralla, Fausto Baldanti, Maria R. Capobianchi, Cesare E.M. Gruber, Martina Rueda, Barbara Bartolini, Antonino Di Caro                                                                                                                                                                                                                                                                                                                                                 |
| EPI_ISL_451309                                                                                                                                                                                                                                                                                                                                                                                                                                                                                                                                                                                                                                                                                                                                                                                                                                                                                                 | Molecular Virology Unit, Fondazione IRCCS Policlinico San Matteo , Pavia                                                             | Laboratory of Virology, INMI Lazzaro Spallanzani IRCCS                                                                                                                                                                                                           | Fausto Baldanti, Antonio Piralla, Cesare E.M. Gruber, Maria R. Capobianchi, Antonino Di Caro, Martina Rueda, Barbara Bartolini                                                                                                                                                                                                                                                                                                                                                 |
| EPI_ISL_451310, EPI_ISL_451311                                                                                                                                                                                                                                                                                                                                                                                                                                                                                                                                                                                                                                                                                                                                                                                                                                                                                 | Hellenic Pasteur Institute, National Influenza Reference laboratory of Southern Greece & Unit of Bioinformatics and Applied Genomics | Hellenic Pasteur Institute, National Influenza Reference laboratory of Southern Greece & Unit of Bioinformatics and Applied Genomics                                                                                                                             | Vasiliki Pogka, Timokratis Karamitros, Athanasios Kossyvakis, Antonios Kalliaropoulos, Horefti Elina, Evangelidou Maria, Androniki Voulgari-Kokota, Aspasia Kontou, Andreas Mentis                                                                                                                                                                                                                                                                                             |
| EPI_ISL_451313, EPI_ISL_451314, EPI_ISL_451315, EPI_ISL_451316, EPI_ISL_451318, EPI_ISL_451319, EPI_ISL_451320, EPI_ISL_451321, EPI_ISL_451322, EPI_ISL_451325, EPI_ISL_451326, EPI_ISL_451327, EPI_ISL_451328, EPI_ISL_451329, EPI_ISL_451330, EPI_ISL_451331, EPI_ISL_451334, EPI_ISL_451337, EPI_ISL_451338, EPI_ISL_451344, EPI_ISL_451345, EPI_ISL_451346, EPI_ISL_451348, EPI_ISL_451353, EPI_ISL_451354, EPI_ISL_451356, EPI_ISL_451357, EPI_ISL_451359, EPI_ISL_451360, EPI_ISL_451365, EPI_ISL_451369, EPI_ISL_451370, EPI_ISL_451371, EPI_ISL_451374, EPI_ISL_451376, EPI_ISL_451377, EPI_ISL_451378, EPI_ISL_451379, EPI_ISL_451380, EPI_ISL_451381, EPI_ISL_451382, EPI_ISL_451383, EPI_ISL_451384, EPI_ISL_451385, EPI_ISL_451386, EPI_ISL_451387, EPI_ISL_451388, EPI_ISL_451389, EPI_ISL_451390, EPI_ISL_451391, EPI_ISL_451392, EPI_ISL_451393, EPI_ISL_451394, EPI_ISL_451395, EPI_ISL_451398 | State Key Laboratory of Biotherapy of Sichuan University                                                                             | Baowen Du, Minjin Wang, Chao Tang, Chuan Chen, Yongzhao Zhou, Mingxia Yu, Hancheng Wei, Weimin Li, Jing-wen Lin, Jia Geng, Binwu Ying, Lu Chen<br>Lukasz Rabalski, Anna Piotrowska-Mietelska, Maciej Kosinski, Boguslaw Szcwyczyk, Krystyna Bienkowska-Szcwyczyk |                                                                                                                                                                                                                                                                                                                                                                                                                                                                                |
| see above                                                                                                                                                                                                                                                                                                                                                                                                                                                                                                                                                                                                                                                                                                                                                                                                                                                                                                      | West China Hospital of Sichuan University                                                                                            | State Key Laboratory of Biotherapy of Sichuan University                                                                                                                                                                                                         | Baowen Du, Minjin Wang, Chao Tang, Chuan Chen, Yongzhao Zhou, Mingxia Yu, Hancheng Wei, Weimin Li, Jing-wen Lin, Jia Geng, Binwu Ying, Lu Chen                                                                                                                                                                                                                                                                                                                                 |
| EPI_ISL_451644, EPI_ISL_451645, EPI_ISL_451646, EPI_ISL_451647                                                                                                                                                                                                                                                                                                                                                                                                                                                                                                                                                                                                                                                                                                                                                                                                                                                 | Laboratory of Molecular Biology, Diagnostyka sp. z o.o.                                                                              | Laboratory of Recombinant Vaccines                                                                                                                                                                                                                               | Lukasz Rabalski, Anna Piotrowska-Mietelska, Maciej Kosinski, Boguslaw Szcwyczyk, Krystyna Bienkowska-Szcwyczyk                                                                                                                                                                                                                                                                                                                                                                 |
| EPI_ISL_451655, EPI_ISL_451656, EPI_ISL_451657, EPI_ISL_451658, EPI_ISL_451659, EPI_ISL_451660, EPI_ISL_451661, EPI_ISL_451662, EPI_ISL_451663, EPI_ISL_451664                                                                                                                                                                                                                                                                                                                                                                                                                                                                                                                                                                                                                                                                                                                                                 | State Sanitary Inspectorate                                                                                                          | Laboratory of Recombinant Vaccines                                                                                                                                                                                                                               | Lukasz Rabalski, Boguslaw Szcwyczyk, Krystyna Bienkowska-Szcwyczyk, Jaroslaw Pinks                                                                                                                                                                                                                                                                                                                                                                                             |

|                                                                                                                                                                                                                                                                                                                                                                                                                                                                                                                                                                                                                                |                                                                                                                                                                                                                                                                                         |                                                                                                              |                                                                                                                                                                                                                                                                                                                                                                                                                                                              |
|--------------------------------------------------------------------------------------------------------------------------------------------------------------------------------------------------------------------------------------------------------------------------------------------------------------------------------------------------------------------------------------------------------------------------------------------------------------------------------------------------------------------------------------------------------------------------------------------------------------------------------|-----------------------------------------------------------------------------------------------------------------------------------------------------------------------------------------------------------------------------------------------------------------------------------------|--------------------------------------------------------------------------------------------------------------|--------------------------------------------------------------------------------------------------------------------------------------------------------------------------------------------------------------------------------------------------------------------------------------------------------------------------------------------------------------------------------------------------------------------------------------------------------------|
| EPI_ISL_451666                                                                                                                                                                                                                                                                                                                                                                                                                                                                                                                                                                                                                 | M.P Shah Government Medocal college Jamnagar                                                                                                                                                                                                                                            | Gujarat Biotechnology Research Centre                                                                        | Binita Aring, Janvi Raval, Zarna Patel, Monika Gandhi, Pinal Trivedi, Maharshi Pandya, Amit Kanani, Nidhi Patel, Nitin Savaliya, Raghawendra Kumar, Dinesh Kumar, Zuber Saiyed, Komal Patel, Labdhi Pandya, Snehal Bagatharia, Ramesh Pandit, Tejas Shah, Ankit Hinsu, Pritesh Sabara, Apurvasinh Puvvar, Bhavesh Modi, Gaurishankar Shrimali, R D Dixit, A M Kadri, Akanksha Verma, Chaitanya Joshi, Madhvi Joshi.                                          |
| EPI_ISL_451934                                                                                                                                                                                                                                                                                                                                                                                                                                                                                                                                                                                                                 | Research Unit, University Hospital for Infectious Diseases "Dr. Fran Mihaljević"                                                                                                                                                                                                        | Cicin Sain lab, Helmholtz Centre for Infection Research                                                      | Zeeshan Chaudhry, Kathrin Eschke, Željka Mažak Šafranko, Ivan-Christian Kurolt                                                                                                                                                                                                                                                                                                                                                                               |
| EPI_ISL_451935                                                                                                                                                                                                                                                                                                                                                                                                                                                                                                                                                                                                                 | CUB Hopital Erasme Laboratoire d'Anatomie Pathologique                                                                                                                                                                                                                                  | CUB Hopital Erasme Laboratoire d'Anatomie Pathologique                                                       | Prof. Isabelle Salmon, Dr. Nicky D'Haene                                                                                                                                                                                                                                                                                                                                                                                                                     |
| EPI_ISL_451961                                                                                                                                                                                                                                                                                                                                                                                                                                                                                                                                                                                                                 | Istituto Zooprofilattico Sperimentale Puglia e Basilicata; Dipartimento di Bioscienze, Biotechnologie e Biofarmaceutica dell'Università degli Studi di Bari "A.Moro"; Istituto di Biomembrane, Bioenergetica e Biotechnologie Molecolari del Consiglio Nazionale delle Ricerche di Bari | Beaconlab (Bioinformatics Evolution and Comparative Genomics lab), Dept. of Biosciences, University of Milan | Parisi A.,Pesole G., Manzari C., Chiara M.                                                                                                                                                                                                                                                                                                                                                                                                                   |
| EPI_ISL_452139                                                                                                                                                                                                                                                                                                                                                                                                                                                                                                                                                                                                                 | Instituto de Diagnostico y Referencia Epidemiologicos (INDRE)                                                                                                                                                                                                                           | Instituto de diagnóstico y Referencia Epidemiologicos (INDRE)                                                | Ramirez-Gonzalez Ernesto, Garces-Ayala Fabiola, Araiza-Rodriguez Adnan, Mendieta-Condado Edgar, Rodriguez-Maldonado Abril, Wong-Arambula Claudia, Barrera-Badillo Gisela, Hernandez-Rivas Lucia, Lopez-Martinez Irma                                                                                                                                                                                                                                         |
| EPI_ISL_452140                                                                                                                                                                                                                                                                                                                                                                                                                                                                                                                                                                                                                 | CUB Hopital Erasme Laboratoire d'Anatomie Pathologique                                                                                                                                                                                                                                  | CUB Hopital Erasme Laboratoire d'Anatomie Pathologique                                                       | Isabelle Salmon, Nicky D'Haene                                                                                                                                                                                                                                                                                                                                                                                                                               |
| EPI_ISL_452142                                                                                                                                                                                                                                                                                                                                                                                                                                                                                                                                                                                                                 | CUB Hopital Erasme Laboratoire d'Anatomie Pathologique                                                                                                                                                                                                                                  | CUB Hopital Erasme Laboratoire d'Anatomie Pathologique                                                       | Isabelle Salmon, Nicky D'Haene                                                                                                                                                                                                                                                                                                                                                                                                                               |
| EPI_ISL_452148, EPI_ISL_452149                                                                                                                                                                                                                                                                                                                                                                                                                                                                                                                                                                                                 | CUB Hopital Erasme Laboratoire d'Anatomie Pathologique                                                                                                                                                                                                                                  | CUB Hopital Erasme Laboratoire d'Anatomie Pathologique                                                       | Isabelle Salmon, Nicky D'Haene                                                                                                                                                                                                                                                                                                                                                                                                                               |
| EPI_ISL_452150                                                                                                                                                                                                                                                                                                                                                                                                                                                                                                                                                                                                                 | CUB Hopital Erasme Laboratoire d'Anatomie Pathologique                                                                                                                                                                                                                                  | CUB Hopital Erasme Laboratoire d'Anatomie Pathologique                                                       | Prof. Isabelle Salmon, Dr Nicky D'Haene                                                                                                                                                                                                                                                                                                                                                                                                                      |
| EPI_ISL_452151                                                                                                                                                                                                                                                                                                                                                                                                                                                                                                                                                                                                                 | CUB Hopital Erasme Laboratoire d'Anatomie Pathologique                                                                                                                                                                                                                                  | CUB Hopital Erasme Laboratoire d'Anatomie Pathologique                                                       | Prof. Isabelle Salmon, Dr.Nicky D'Haene                                                                                                                                                                                                                                                                                                                                                                                                                      |
| EPI_ISL_452152                                                                                                                                                                                                                                                                                                                                                                                                                                                                                                                                                                                                                 | CUB Hopital Erasme Laboratoire d'Anatomie Pathologique                                                                                                                                                                                                                                  | CUB Hopital Erasme Laboratoire d'Anatomie Pathologique                                                       | Prof. Isabelle Salmon, Dr Nicky D'Haene                                                                                                                                                                                                                                                                                                                                                                                                                      |
| EPI_ISL_452192, EPI_ISL_452193, EPI_ISL_452194, EPI_ISL_452195, EPI_ISL_452196, EPI_ISL_452197, EPI_ISL_452198, EPI_ISL_452199, EPI_ISL_452200, EPI_ISL_452201, EPI_ISL_452202, EPI_ISL_452203, EPI_ISL_452204, EPI_ISL_452205, EPI_ISL_452206, EPI_ISL_452207, EPI_ISL_452208, EPI_ISL_452209, EPI_ISL_452210, EPI_ISL_452211, EPI_ISL_452212, EPI_ISL_452213                                                                                                                                                                                                                                                                 |                                                                                                                                                                                                                                                                                         |                                                                                                              | Potdar V                                                                                                                                                                                                                                                                                                                                                                                                                                                     |
| see above                                                                                                                                                                                                                                                                                                                                                                                                                                                                                                                                                                                                                      | NIV Influenza                                                                                                                                                                                                                                                                           | NIV Influenza                                                                                                |                                                                                                                                                                                                                                                                                                                                                                                                                                                              |
| EPI_ISL_452218, EPI_ISL_452219, EPI_ISL_452220, EPI_ISL_452221, EPI_ISL_452222, EPI_ISL_452223                                                                                                                                                                                                                                                                                                                                                                                                                                                                                                                                 | Goethe University Hospital Frankfurt                                                                                                                                                                                                                                                    | Institute for Medical Virology, Goethe University Hospital Frankfurt                                         | Tuna Toptan, Sebastian Hoehel, Sandra Westhaus, Denisa Bojkova, Annemarie Berger, Björn Rotter, Klaus Hoffmeier, Jindrich Cinatl, Sandra Ciesek, and Marek Widera                                                                                                                                                                                                                                                                                            |
| EPI_ISL_452327, EPI_ISL_452328, EPI_ISL_452329, EPI_ISL_452330, EPI_ISL_452331, EPI_ISL_452332, EPI_ISL_452333, EPI_ISL_452334, EPI_ISL_452335, EPI_ISL_452336, EPI_ISL_452337, EPI_ISL_452338, EPI_ISL_452339, EPI_ISL_452340, EPI_ISL_452341, EPI_ISL_452342, EPI_ISL_452343, EPI_ISL_452344, EPI_ISL_452345, EPI_ISL_452346, EPI_ISL_452347, EPI_ISL_452348, EPI_ISL_452349, EPI_ISL_452350, EPI_ISL_452351, EPI_ISL_452352, EPI_ISL_452353, EPI_ISL_452354, EPI_ISL_452355, EPI_ISL_452356, EPI_ISL_452357, EPI_ISL_452358, EPI_ISL_452359, EPI_ISL_452360, EPI_ISL_452361, EPI_ISL_452362, EPI_ISL_452363, EPI_ISL_452364 |                                                                                                                                                                                                                                                                                         |                                                                                                              |                                                                                                                                                                                                                                                                                                                                                                                                                                                              |
| see above                                                                                                                                                                                                                                                                                                                                                                                                                                                                                                                                                                                                                      | Laboratory of Infectious Diseases Center of Beijing Ditan Hospital                                                                                                                                                                                                                      | Laboratory of Infectious Diseases Center of Beijing Ditan Hospital                                           | Siyuan Yang, Chengjie Jie, Fengting Yu, Yunxia Tang, Liting Yan, Linghang Wang                                                                                                                                                                                                                                                                                                                                                                               |
| EPI_ISL_452473, EPI_ISL_452480, EPI_ISL_452481, EPI_ISL_452484, EPI_ISL_452487, EPI_ISL_452488, EPI_ISL_452492, EPI_ISL_452496, EPI_ISL_452498, EPI_ISL_452500, EPI_ISL_452503, EPI_ISL_452509, EPI_ISL_452521, EPI_ISL_452534                                                                                                                                                                                                                                                                                                                                                                                                 |                                                                                                                                                                                                                                                                                         |                                                                                                              |                                                                                                                                                                                                                                                                                                                                                                                                                                                              |
| see above                                                                                                                                                                                                                                                                                                                                                                                                                                                                                                                                                                                                                      | Clinica Universidad de Navarra. Servicio de Enfermedades Infecciosas y Microbiología clínica                                                                                                                                                                                            | SeqCOVID-SPAIN consortium/IBV(CSIC)                                                                          | Mirian Fernández-Alonso, Jose Luis del Pozo and SeqCOVID-SPAIN consortium                                                                                                                                                                                                                                                                                                                                                                                    |
| EPI_ISL_454497, EPI_ISL_454498                                                                                                                                                                                                                                                                                                                                                                                                                                                                                                                                                                                                 | RSE "National Center for Biotechnology"                                                                                                                                                                                                                                                 | RSE "National Center for Biotechnology"                                                                      | Alexandr Shevtsov, Ilyas Akhmetollayev, Viktoriya Lutsay, Asyulian Amirgazin, Askar Abdaliyev, Akbota Rakhmetova, Zabira Aushakhmetova, Ruslan Kalendar, Yerlan Ramankulov                                                                                                                                                                                                                                                                                   |
| EPI_ISL_454499, EPI_ISL_454500, EPI_ISL_454501, EPI_ISL_454502, EPI_ISL_454503, EPI_ISL_454504, EPI_ISL_454505, EPI_ISL_454506, EPI_ISL_454507, EPI_ISL_454508, EPI_ISL_454509, EPI_ISL_454510, EPI_ISL_454511, EPI_ISL_454512, EPI_ISL_454513, EPI_ISL_454514, EPI_ISL_454515, EPI_ISL_454516, EPI_ISL_454517, EPI_ISL_454518, EPI_ISL_454519, EPI_ISL_454520                                                                                                                                                                                                                                                                 |                                                                                                                                                                                                                                                                                         |                                                                                                              |                                                                                                                                                                                                                                                                                                                                                                                                                                                              |
| see above                                                                                                                                                                                                                                                                                                                                                                                                                                                                                                                                                                                                                      | RSE "National Center for Biotechnology"                                                                                                                                                                                                                                                 | RSE "National Center for Biotechnology"                                                                      | Alexandr Shevtsov, Ilyas Akhmetollayev, Viktoriya Lutsay, Asyulian Amirgazin, Askar Abdaliyev, Akbota Rakhmetova, Ruslan Kalendar, Yerlan Ramankulov                                                                                                                                                                                                                                                                                                         |
| EPI_ISL_454521, EPI_ISL_454522, EPI_ISL_454524, EPI_ISL_454525, EPI_ISL_454526, EPI_ISL_454527, EPI_ISL_454528, EPI_ISL_454529, EPI_ISL_454530, EPI_ISL_454531, EPI_ISL_454532, EPI_ISL_454533, EPI_ISL_454534, EPI_ISL_454536, EPI_ISL_454537, EPI_ISL_454540, EPI_ISL_454542, EPI_ISL_454543, EPI_ISL_454544, EPI_ISL_454546, EPI_ISL_454547, EPI_ISL_454549, EPI_ISL_454551, EPI_ISL_454552, EPI_ISL_454556, EPI_ISL_454557, EPI_ISL_454558, EPI_ISL_454560, EPI_ISL_454561, EPI_ISL_454562                                                                                                                                 |                                                                                                                                                                                                                                                                                         |                                                                                                              |                                                                                                                                                                                                                                                                                                                                                                                                                                                              |
| see above                                                                                                                                                                                                                                                                                                                                                                                                                                                                                                                                                                                                                      | NIV Influenza                                                                                                                                                                                                                                                                           | NIV Influenza                                                                                                | Potdar V                                                                                                                                                                                                                                                                                                                                                                                                                                                     |
| EPI_ISL_454574                                                                                                                                                                                                                                                                                                                                                                                                                                                                                                                                                                                                                 | nsstitute for Public Health                                                                                                                                                                                                                                                             | Laboratory for advanced genomics                                                                             | Filip Rokić, Lovro Trgovec-Greif, Neven Sučić, Tomislav Rukavina, Igor Jurak, Oliver Vugrek                                                                                                                                                                                                                                                                                                                                                                  |
| EPI_ISL_454578                                                                                                                                                                                                                                                                                                                                                                                                                                                                                                                                                                                                                 | University Hospital for Infectious Diseases "Dr. Fran Mihaljević", Research Unit                                                                                                                                                                                                        | University of Zagreb, Centre for research and knowledge transfer in biotechnology                            | Ivan-Christian Kurolt, Jelena Ivancic Jelecki, Anamarija Slovic                                                                                                                                                                                                                                                                                                                                                                                              |
| EPI_ISL_454581, EPI_ISL_454583, EPI_ISL_454588                                                                                                                                                                                                                                                                                                                                                                                                                                                                                                                                                                                 | University Hospital for Infectious Diseases "Dr. Fran Mihaljević", Research Unit                                                                                                                                                                                                        | University of Zagreb, Centre for research and knowledge transfer in biotechnology                            | Ivan-Christian Kurolt, Jelena Ivancic Jelecki, Anamarija Slovic                                                                                                                                                                                                                                                                                                                                                                                              |
| EPI_ISL_454592                                                                                                                                                                                                                                                                                                                                                                                                                                                                                                                                                                                                                 | University Hospital for Infectious Diseases "Dr. Fran Mihaljević", Research Unit                                                                                                                                                                                                        | University of Zagreb, Centre for research and knowledge transfer in biotechnology                            | Ivan-Christian Kurolt, Jelena Ivancic Jelecki, Anamarija Slovic                                                                                                                                                                                                                                                                                                                                                                                              |
| EPI_ISL_454602                                                                                                                                                                                                                                                                                                                                                                                                                                                                                                                                                                                                                 | Croatian Institute of Public Health                                                                                                                                                                                                                                                     | University of Zagreb, Centre for research and knowledge transfer in biotechnology                            | Irena Tabain, Tatjana Vilicic-Cavlek, Jelena Ivancic Jelecki, Anamarija Slovic                                                                                                                                                                                                                                                                                                                                                                               |
| EPI_ISL_454605, EPI_ISL_454606                                                                                                                                                                                                                                                                                                                                                                                                                                                                                                                                                                                                 | Institute for Public Health                                                                                                                                                                                                                                                             | Laboratory for advanced genomics                                                                             | Filip Rokić, Lovro Trgovec-Greif, Neven Sučić, Tomislav Rukavina, Igor Jurak, Oliver Vugrek                                                                                                                                                                                                                                                                                                                                                                  |
| EPI_ISL_454732                                                                                                                                                                                                                                                                                                                                                                                                                                                                                                                                                                                                                 | Russian State Collection of Viruses                                                                                                                                                                                                                                                     | Pathogenic Microorganisms Variability Laboratory                                                             | Denis Protsenko, Alexey Shchetnin, Maria Nikiforova, Elena Shidlovskaya, Nadezhda Kuznetsova, Vladimir Gushchin, Inna Dolzhikova, Daria Grousova, Andrey Botikov, Denis Logunov, Alexander Gintsburg, Alexey Mazus                                                                                                                                                                                                                                           |
| EPI_ISL_454749                                                                                                                                                                                                                                                                                                                                                                                                                                                                                                                                                                                                                 | Japanese Quarantine Stations                                                                                                                                                                                                                                                            | Pathogen Genomics Center, National Institute of Infectious Diseases                                          | Tsuyoshi Sekizuka, Kentaro Itokawa, Rina Tanaka, Masanori Hashino, Tsutomu Kageyama, Shinji Saito, Ikuyo Takayama, Hideki Hasegawa, Takuri Takahashi, Hajime Kamiya, Takuya Yamagishi, Motoi Suzuki, Takaji Wakita, Makoto Kuroda                                                                                                                                                                                                                            |
| EPI_ISL_454830, EPI_ISL_454831, EPI_ISL_454832, EPI_ISL_454833                                                                                                                                                                                                                                                                                                                                                                                                                                                                                                                                                                 | SMS Medical College, Jaipur                                                                                                                                                                                                                                                             | CSIR Institute of Genomics and Integrative Biology                                                           | Sudhri Bhandari, Rahul Bhojar, Mohammed Imran, Mohit Divakar, Disha Sharma, Anshul Kumar, Bani Jolly, Rahul Sahlot, Abhinav Jain, Paras Sehgal, Gyan Ranjan, Vinod Scaria, Sridhar Sivasubbu, Sandeep K Mathur                                                                                                                                                                                                                                               |
| EPI_ISL_454858, EPI_ISL_454862, EPI_ISL_454865, EPI_ISL_454866, EPI_ISL_454867                                                                                                                                                                                                                                                                                                                                                                                                                                                                                                                                                 | Translational Health Science and Technology Institute - ESIC medical college and hospital, Faridabad                                                                                                                                                                                    | THSTI Bioassay laboratory                                                                                    | Saurabh Kumar, Jigme Wangchuk, Anil Kumar Pandey, Asim Das, Guruprasad R. Medigeshi                                                                                                                                                                                                                                                                                                                                                                          |
| EPI_ISL_455015                                                                                                                                                                                                                                                                                                                                                                                                                                                                                                                                                                                                                 | Pandit Deendayal Upadhyay Government Medical College, Rajkot                                                                                                                                                                                                                            | Gujarat Biotechnology Research Centre                                                                        | Snehal Bagatharia, Prakash Modi, Sejul Antala, Manish Pattani, Ramesh Pandit, Tejas Shah, Ankit Hinsu, Pritesh Sabara, Apurvasinh Puvvar, Janvi Raval, Zarna Patel, Monika Gandhi, Pinal Trivedi, Maharshi Pandya, Amit Kanani, Nidhi Patel, Nitin Savaliya, Raghawendra Kumar, Dinesh Kumar, Zuber Saiyed, Komal Patel, Labdhi Pandya, Neha Rajpara, Bhavesh Modi, Gaurishankar Shrimali, R D Dixit, A M Kadri, Umang Mishra, Chaitanya Joshi, Madhvi Joshi |
| EPI_ISL_455016                                                                                                                                                                                                                                                                                                                                                                                                                                                                                                                                                                                                                 | Pandit Deendayal Upadhyay Government Medical College, Rajkot                                                                                                                                                                                                                            | Gujarat Biotechnology Research Centre                                                                        | Prakash Modi, Sejul Antala, Manish Pattani, Ramesh Pandit, Tejas Shah, Ankit Hinsu, Pritesh Sabara, Apurvasinh Puvvar, Janvi Raval, Zarna Patel, Monika Gandhi, Pinal Trivedi, Maharshi Pandya, Amit Kanani, Nidhi Patel, Nitin Savaliya, Raghawendra Kumar, Dinesh Kumar, Zuber Saiyed, Komal Patel, Labdhi Pandya, Snehal Bagatharia, Afzal Ansari, Bhavesh Modi, Gaurishankar Shrimali, R D Dixit, A M Kadri, Umang Mishra, Chaitanya Joshi, Madhvi Joshi |
| EPI_ISL_455017                                                                                                                                                                                                                                                                                                                                                                                                                                                                                                                                                                                                                 | Government Medical College, Vadodara                                                                                                                                                                                                                                                    | Gujarat Biotechnology Research Centre                                                                        | Tanuja Javadekar , R N Daveswkar, Ramesh Pandit, Tejas Shah, Ankit Hinsu, Pritesh Sabara, Apurvasinh Puvvar, Janvi Raval, Zarna Patel, Monika Gandhi, Pinal Trivedi, Maharshi Pandya, Amit Kanani, Nidhi Patel, Nitin Savaliya, Raghawendra Kumar, Dinesh Kumar, Zuber Saiyed, Komal Patel, Labdhi Pandya, Snehal Bagatharia, Fenil Patel, Bhavesh Modi, Gaurishankar Shrimali, R D Dixit, A M Kadri, Umang Mishra, Chaitanya Joshi, Madhvi Joshi            |
| EPI_ISL_455018                                                                                                                                                                                                                                                                                                                                                                                                                                                                                                                                                                                                                 | Government Medical College, Vadodara                                                                                                                                                                                                                                                    | Gujarat Biotechnology Research Centre                                                                        | R N Daveswkar, Ramesh Pandit, Tejas Shah, Ankit Hinsu, Pritesh Sabara, Apurvasinh Puvvar, Janvi Raval, Zarna Patel, Monika Gandhi, Pinal Trivedi, Maharshi Pandya, Amit Kanani, Nidhi Patel, Nitin Savaliya, Raghawendra Kumar, Dinesh Kumar, Zuber Saiyed, Komal Patel, Labdhi Pandya, Snehal Bagatharia, Tanuja Javadekar , Neelam Nathani, Bhavesh Modi, Gaurishankar Shrimali, R D Dixit, A M Kadri, Umang Mishra, Chaitanya Joshi, Madhvi Joshi,        |
| EPI_ISL_455019                                                                                                                                                                                                                                                                                                                                                                                                                                                                                                                                                                                                                 | Government Medical College, Vadodara                                                                                                                                                                                                                                                    | Gujarat Biotechnology Research Centre                                                                        | Ramesh Pandit, Tejas Shah, Ankit Hinsu, Pritesh Sabara, Apurvasinh Puvvar, Janvi Raval, Zarna Patel, Monika Gandhi, Pinal Trivedi, Maharshi Pandya, Amit Kanani, Nidhi Patel, Nitin Savaliya, Raghawendra Kumar, Dinesh Kumar, Zuber Saiyed, Komal Patel, Labdhi Pandya, Snehal Bagatharia, Tanuja Javadekar , R N Daveswkar, Armi Chaudhari, Bhavesh Modi, Gaurishankar Shrimali, R D Dixit, A M Kadri, Umang Mishra, Chaitanya Joshi, Madhvi Joshi,        |
| EPI_ISL_455020                                                                                                                                                                                                                                                                                                                                                                                                                                                                                                                                                                                                                 | Government Medical College, Vadodara                                                                                                                                                                                                                                                    | Gujarat Biotechnology Research Centre                                                                        | Tejas Shah, Ankit Hinsu, Pritesh Sabara, Apurvasinh Puvvar, Janvi Raval, Zarna Patel, Monika Gandhi, Pinal Trivedi, Maharshi Pandya, Amit Kanani, Nidhi Patel, Nitin Savaliya, Raghawendra Kumar, Dinesh Kumar, Zuber Saiyed, Komal Patel, Labdhi Pandya, Snehal Bagatharia, Tanuja Javadekar , R N Daveswkar, Ramesh Pandit, Bhavya Jindal, Bhavesh Modi, Gaurishankar Shrimali, R D Dixit, A M Kadri, Umang Mishra, Chaitanya Joshi, Madhvi Joshi,         |
| EPI_ISL_455021                                                                                                                                                                                                                                                                                                                                                                                                                                                                                                                                                                                                                 | Government Medical College, Vadodara                                                                                                                                                                                                                                                    | Gujarat Biotechnology Research Centre                                                                        | Ankit Hinsu, Pritesh Sabara, Apurvasinh Puvvar, Janvi Raval, Zarna Patel, Monika Gandhi, Pinal Trivedi, Maharshi Pandya, Amit Kanani, Nidhi Patel, Nitin Savaliya, Raghawendra Kumar, Dinesh Kumar, Zuber Saiyed, Komal Patel, Labdhi Pandya, Snehal Bagatharia, Tanuja Javadekar , R N Daveswkar, Ramesh Pandit, Tejas Shah, Camellia Chakraborty, Bhavesh Modi, Gaurishankar Shrimali, R D Dixit, A M Kadri, Umang Mishra, Chaitanya Joshi, Madhvi Joshi,  |
| EPI_ISL_455022                                                                                                                                                                                                                                                                                                                                                                                                                                                                                                                                                                                                                 | Government Medical College, Vadodara                                                                                                                                                                                                                                                    | Gujarat Biotechnology Research Centre                                                                        | Pritesh Sabara, Apurvasinh Puvvar, Janvi Raval, Zarna Patel, Monika Gandhi, Pinal Trivedi, Maharshi Pandya, Amit Kanani, Nidhi Patel, Nitin Savaliya, Raghawendra Kumar, Dinesh Kumar, Zuber Saiyed, Komal Patel, Labdhi Pandya, Snehal Bagatharia, Tanuja Javadekar , R N Daveswkar, Ramesh Pandit, Tejas Shah, Ankit Hinsu, Siddhant Kumar, Bhavesh Modi, Gaurishankar Shrimali, R D Dixit, A M Kadri, Umang Mishra, Chaitanya Joshi, Madhvi Joshi,        |
| EPI_ISL_455023                                                                                                                                                                                                                                                                                                                                                                                                                                                                                                                                                                                                                 | Government Medical College, Vadodara                                                                                                                                                                                                                                                    | Gujarat Biotechnology Research Centre                                                                        | Apurvasinh Puvvar, Janvi Raval, Zarna Patel, Monika Gandhi, Pinal Trivedi, Maharshi Pandya, Amit Kanani, Nidhi Patel, Nitin Savaliya, Raghawendra Kumar, Dinesh Kumar, Zuber Saiyed, Komal Patel, Labdhi Pandya, Snehal Bagatharia, Tanuja Javadekar , R N Daveswkar, Ramesh Pandit, Tejas Shah, Ankit Hinsu, Pritesh Sabara, Priyanka P Vatsa, Bhavesh Modi, Gaurishankar Shrimali, R D Dixit, A M Kadri, Umang Mishra, Chaitanya Joshi, Madhvi Joshi,      |
| EPI_ISL_455024                                                                                                                                                                                                                                                                                                                                                                                                                                                                                                                                                                                                                 | Government Medical College, Vadodara                                                                                                                                                                                                                                                    | Gujarat Biotechnology Research Centre                                                                        | Janvi Raval, Zarna Patel, Monika Gandhi, Pinal Trivedi, Maharshi Pandya, Amit Kanani, Nidhi Patel, Nitin Savaliya, Raghawendra Kumar, Dinesh Kumar, Zuber Saiyed, Komal Patel, Labdhi Pandya, Snehal Bagatharia, Tanuja Javadekar , R N Daveswkar, Ramesh Pandit, Tejas Shah, Ankit Hinsu, Pritesh Sabara, Apurvasinh Puvvar, Poqja P Doshi, Bhavesh Modi, Gaurishankar Shrimali, R D Dixit, A M Kadri, Umang Mishra, Chaitanya Joshi, Madhvi Joshi,         |
| EPI_ISL_455025                                                                                                                                                                                                                                                                                                                                                                                                                                                                                                                                                                                                                 | Government Medical College, Vadodara                                                                                                                                                                                                                                                    | Gujarat Biotechnology Research Centre                                                                        | Zarna Patel, Monika Gandhi, Pinal Trivedi, Maharshi Pandya, Amit Kanani, Nidhi Patel, Nitin Savaliya, Raghawendra Kumar, Dinesh Kumar, Zuber Saiyed, Komal Patel, Labdhi Pandya, Snehal Bagatharia, Tanuja Javadekar , R N Daveswkar, Ramesh Pandit, Tejas Shah, Ankit Hinsu, Pritesh Sabara, Apurvasinh Puvvar, Janvi Raval, Akanksha Verma, Bhavesh Modi, Gaurishankar Shrimali, R D Dixit, A M Kadri, Umang Mishra, Chaitanya Joshi, Madhvi Joshi,        |
| EPI_ISL_455026                                                                                                                                                                                                                                                                                                                                                                                                                                                                                                                                                                                                                 | Government Medical College, Vadodara                                                                                                                                                                                                                                                    | Gujarat Biotechnology Research Centre                                                                        | Monika Gandhi, Pinal Trivedi, Maharshi Pandya, Amit Kanani, Nidhi Patel, Nitin Savaliya, Raghawendra Kumar, Dinesh Kumar, Zuber Saiyed, Komal Patel, Labdhi Pandya, Snehal Bagatharia, Tanuja Javadekar , R N Daveswkar, Ramesh Pandit, Tejas Shah, Ankit Hinsu, Pritesh Sabara, Apurvasinh Puvvar, Janvi Raval, Zarna Patel, Priti Pandita, Bhavesh Modi,                                                                                                   |

|                                                                                                                                                                                                                                                                                                                |                                                                                                                                |                                                                                                                            |                                                                                                                                                                                                                                                                                                                                                                                                                                                   |
|----------------------------------------------------------------------------------------------------------------------------------------------------------------------------------------------------------------------------------------------------------------------------------------------------------------|--------------------------------------------------------------------------------------------------------------------------------|----------------------------------------------------------------------------------------------------------------------------|---------------------------------------------------------------------------------------------------------------------------------------------------------------------------------------------------------------------------------------------------------------------------------------------------------------------------------------------------------------------------------------------------------------------------------------------------|
| EPI_ISL_455027                                                                                                                                                                                                                                                                                                 | Government Medical College, Vadodara                                                                                           | Gujarat Biotechnology Research Centre                                                                                      | Gaurishankar Shrimali, R D Dixit, A M Kadri, Umang Mishra, Chaitanya Joshi, Madhvi Joshi,                                                                                                                                                                                                                                                                                                                                                         |
| EPI_ISL_455312                                                                                                                                                                                                                                                                                                 | Microbiology Unit, Department of Pathology & Laboratory Medicine, IUM Medical Centre                                           | SEA Microbiome Unit, Faculty of Industrial Sciences & Technology, Universiti Malaysia Pahang                               | Pinal Trivedi, Maharshi Pandya, Amit Kanani, Nidhi Patel, Nitin Savaliya, Raaghendra Kumar, Dinesh Kumar, Zuber Saiyed, Komal Patel, Labdhi Pandya, Snehal Bagatharia, Tanuja Javadekar , R N Daveswar, Ramesh Pandit, Tejas Shah, Ankit Hinsu, Pritesh Sabara, Apurvasinh Puvar, Janvi Raval, Zarina Patel, Monika Gandhi, Pragy Sharma, Bhavesh Modi, Gaurishankar Shrimali, R D Dixit, A M Kadri, Umang Mishra, Chaitanya Joshi, Madhvi Joshi, |
| EPI_ISL_455313                                                                                                                                                                                                                                                                                                 | Microbiology Unit, Department of Pathology & Laboratory Medicine, IUM Medical Centre                                           | SEA Microbiome Unit, Faculty of Industrial Sciences & Technology, Universiti Malaysia Pahang                               | Norhidayah Binti Kamarudin, Ahmad Hafiz Bin Zulkifly, Hajar Fauzan Ahmad, Muhammad Adam Lee Abdullah, Mohd Fazli Farida Asras, Ahmad Mahfuz Gazali, Mohd Nazli Bin Kamarulzaman, IUM Medical Centre Covid19 Taskforce, UMP Covid19 Team                                                                                                                                                                                                           |
| EPI_ISL_455314                                                                                                                                                                                                                                                                                                 | Hospital Virgen del Rocío                                                                                                      | Instituto de Salud Carlos III                                                                                              | Iglesias-Caballero, M. Molinero Calamita, M. González-Esguevillas, M. Camarero, S. Pozo, F. Casas, I. Jiménez, P. Jiménez, M. Zaballos, A. Monzón, S. Varona, S. Juliá, M. Cuesta, I. J. Lepe                                                                                                                                                                                                                                                     |
| EPI_ISL_455315, EPI_ISL_455316, EPI_ISL_455317, EPI_ISL_455318, EPI_ISL_455319, EPI_ISL_455320, EPI_ISL_455321, EPI_ISL_455322, EPI_ISL_455324                                                                                                                                                                 | Hospital Virgen de las Nieves                                                                                                  | Instituto de Salud Carlos III                                                                                              | Iglesias-Caballero, M. Molinero Calamita, M. González-Esguevillas, M. Camarero, S. Pozo, F. Casas, I. Jiménez, P. Jiménez, M. Zaballos, A. Monzón, S. Varona, S. Juliá, M. Cuesta, I. S. Sanbonmatsu                                                                                                                                                                                                                                              |
| EPI_ISL_455325                                                                                                                                                                                                                                                                                                 | Hospital Universitario de Canarias                                                                                             | Instituto de Salud Carlos III                                                                                              | Iglesias-Caballero, M. Molinero Calamita, M. González-Esguevillas, M. Camarero, S. Pozo, F. Casas, I. Jiménez, P. Jiménez, M. Zaballos, A. Monzón, S. Varona, S. Juliá, M. Cuesta, I. B. Castro                                                                                                                                                                                                                                                   |
| EPI_ISL_455326                                                                                                                                                                                                                                                                                                 | Hospital Universitario Insular de Gran Canaria                                                                                 | Instituto de Salud Carlos III                                                                                              | Iglesias-Caballero, M. Molinero Calamita, M. González-Esguevillas, M. Camarero, S. Pozo, F. Casas, I. Jiménez, P. Jiménez, M. Zaballos, A. Monzón, S. Varona, S. Juliá, M. Cuesta, I. A. Hernández                                                                                                                                                                                                                                                |
| EPI_ISL_455327                                                                                                                                                                                                                                                                                                 | Consejería de Sanidad y Asuntos Sociales                                                                                       | Instituto de Salud Carlos III                                                                                              | Iglesias-Caballero, M. Molinero Calamita, M. González-Esguevillas, M. Camarero, S. Pozo, F. Casas, I. Jiménez, P. Jiménez, M. Zaballos, A. Monzón, S. Varona, S. Juliá, M. Cuesta, I. G. Gutiérrez                                                                                                                                                                                                                                                |
| EPI_ISL_455328, EPI_ISL_455329, EPI_ISL_455330, EPI_ISL_455331                                                                                                                                                                                                                                                 | Complejo Hospitalario Universitario La Coruna                                                                                  | Instituto de Salud Carlos III                                                                                              | Iglesias-Caballero, M. Molinero Calamita, M. González-Esguevillas, M. Camarero, S. Pozo, F. Casas, I. Jiménez, P. Jiménez, M. Zaballos, A. Monzón, S. Varona, S. Juliá, M. Cuesta, I. M.A Canizares                                                                                                                                                                                                                                               |
| EPI_ISL_455332                                                                                                                                                                                                                                                                                                 | Xerencia de Xestión Integrada de Pontevedra e o Salnés                                                                         | Instituto de Salud Carlos III                                                                                              | Iglesias-Caballero, M. Molinero Calamita, M. González-Esguevillas, M. Camarero, S. Pozo, F. Casas, I. Jiménez, P. Jiménez, M. Zaballos, A. Monzón, S. Varona, S. Juliá, M. Cuesta, I. M. García                                                                                                                                                                                                                                                   |
| EPI_ISL_455333                                                                                                                                                                                                                                                                                                 | Complejo Hospitalario Universitario de Santiago                                                                                | Instituto de Salud Carlos III                                                                                              | Iglesias-Caballero, M. Molinero Calamita, M. González-Esguevillas, M. Camarero, S. Pozo, F. Casas, I. Jiménez, P. Jiménez, M. Zaballos, A. Monzón, S. Varona, S. Juliá, M. Cuesta, I. J. Llovo                                                                                                                                                                                                                                                    |
| EPI_ISL_455334, EPI_ISL_455335                                                                                                                                                                                                                                                                                 | Complejo Hospitalario de Orense                                                                                                | Instituto de Salud Carlos III                                                                                              | Iglesias-Caballero, M. Molinero Calamita, M. González-Esguevillas, M. Camarero, S. Pozo, F. Casas, I. Jiménez, P. Jiménez, M. Zaballos, A. Monzón, S. Varona, S. Juliá, M. Cuesta, I. M. Paz                                                                                                                                                                                                                                                      |
| EPI_ISL_455336, EPI_ISL_455337, EPI_ISL_455338, EPI_ISL_455339, EPI_ISL_455340, EPI_ISL_455341, EPI_ISL_455342, EPI_ISL_455343                                                                                                                                                                                 | Hospital San Pedro                                                                                                             | Instituto de Salud Carlos III                                                                                              | Iglesias-Caballero, M. Molinero Calamita, M. González-Esguevillas, M. Camarero, S. Pozo, F. Casas, I. Jiménez, P. Jiménez, M. Zaballos, A. Monzón, S. Varona, S. Juliá, M. Cuesta, I. C. Alonso                                                                                                                                                                                                                                                   |
| EPI_ISL_455344, EPI_ISL_455345, EPI_ISL_455346, EPI_ISL_455347, EPI_ISL_455348, EPI_ISL_455349                                                                                                                                                                                                                 | Hospital Comarcal de Melilla                                                                                                   | Instituto de Salud Carlos III                                                                                              | Iglesias-Caballero, M. Molinero Calamita, M. González-Esguevillas, M. Camarero, S. Pozo, F. Casas, I. Jiménez, P. Jiménez, M. Zaballos, A. Monzón, S. Varona, S. Juliá, M. Cuesta, I. I. Pérez                                                                                                                                                                                                                                                    |
| EPI_ISL_455350, EPI_ISL_455351                                                                                                                                                                                                                                                                                 | Hospital Txagorritxu                                                                                                           | Instituto de Salud Carlos III                                                                                              | Iglesias-Caballero, M. Molinero Calamita, M. González-Esguevillas, M. Camarero, S. Pozo, F. Casas, I. Jiménez, P. Jiménez, M. Zaballos, A. Monzón, S. Varona, S. Juliá, M. Cuesta, I. C. Gómez                                                                                                                                                                                                                                                    |
| EPI_ISL_455352, EPI_ISL_455353, EPI_ISL_455354                                                                                                                                                                                                                                                                 | Hospital de Cruces                                                                                                             | Instituto de Salud Carlos III                                                                                              | Iglesias-Caballero, M. Molinero Calamita, M. González-Esguevillas, M. Camarero, S. Pozo, F. Casas, I. Jiménez, P. Jiménez, M. Zaballos, A. Monzón, S. Varona, S. Juliá, M. Cuesta, I. M. Aranzamendi                                                                                                                                                                                                                                              |
| EPI_ISL_455362                                                                                                                                                                                                                                                                                                 | Nigeria Centre for Disease Control (NCDC)                                                                                      | African Centre of Excellence for Genomics of Infectious Diseases (ACEGID), Redeemer's University, Ede, Osun State, Nigeria | Oluniyi P.E., Ajogbasile F.V., Kayode A., Olawoye I., Uwanibe J., Oguzie J., Olumade T., Folarin O.A., Ihekweazu C., Happi C.T.                                                                                                                                                                                                                                                                                                                   |
| EPI_ISL_455412, EPI_ISL_455413, EPI_ISL_455419                                                                                                                                                                                                                                                                 | Nigeria Centre for Disease Control (NCDC)                                                                                      | African Centre of Excellence for Genomics of Infectious Diseases (ACEGID), Redeemer's University, Ede, Osun State, Nigeria | Oluniyi P.E., Ajogbasile F.V., Kayode A., Oguzie J., Olawoye I., Uwanibe J., Olumade T., Folarin O.A., Ihekweazu C., Happi C.T.                                                                                                                                                                                                                                                                                                                   |
| EPI_ISL_455422                                                                                                                                                                                                                                                                                                 | Nigeria Centre for Disease Control                                                                                             | African Centre of Excellence for Genomics of Infectious Diseases (ACEGID), Redeemer's University, Ede, Osun State, Nigeria | Oluniyi P.E., Ajogbasile F.V., Kayode A., Oguzie J., Olawoye I., Uwanibe J., Olumade T., Folarin O.A., Ihekweazu C., Happi C.T.                                                                                                                                                                                                                                                                                                                   |
| EPI_ISL_455423, EPI_ISL_455424                                                                                                                                                                                                                                                                                 | Nigeria Centre for Disease Control (NCDC)                                                                                      | African Centre of Excellence for Genomics of Infectious Diseases (ACEGID), Redeemer's University, Ede, Osun State, Nigeria | Oluniyi P.E., Ajogbasile F.V., Kayode A., Oguzie J., Olawoye I., Uwanibe J., Olumade T., Folarin O.A., Ihekweazu C., Happi C.T.                                                                                                                                                                                                                                                                                                                   |
| EPI_ISL_455426                                                                                                                                                                                                                                                                                                 | Nigeria Centre for Disease Control                                                                                             | African Centre of Excellence for Genomics of Infectious Diseases (ACEGID), Redeemer's University, Ede, Osun State, Nigeria | Oluniyi P.E., Ajogbasile F.V., Kayode A., Oguzie J., Olawoye I., Uwanibe J., Olumade T., Folarin O.A., Ihekweazu C., Happi C.T.                                                                                                                                                                                                                                                                                                                   |
| EPI_ISL_455429, EPI_ISL_455431                                                                                                                                                                                                                                                                                 | Nigeria Centre for Disease Control (NCDC)                                                                                      | African Centre of Excellence for Genomics of Infectious Diseases (ACEGID), Redeemer's University, Ede, Osun State, Nigeria | Oluniyi P.E., Ajogbasile F.V., Kayode A., Oguzie J., Olawoye I., Uwanibe J., Olumade T., Folarin O.A., Ihekweazu C., Happi C.T.                                                                                                                                                                                                                                                                                                                   |
| EPI_ISL_455434                                                                                                                                                                                                                                                                                                 | Instituto de Diagnostico y Referencia Epidemiologicos (INDRE)                                                                  | Instituto de Diagnostico y Referencia Epidemiologicos (INDRE)                                                              | Taboada Ramírez Blanca, Ramirez-Gonzalez Ernesto, Garces-Ayala Fabiola, Araiza-Rodriguez Adnan, Mendieta-Condado Edgar, Rodriguez-Maldonado Abril, Wong-Arambula Claudia, Barrera-Badillo Gisela, Hernandez-Rivas Lucia, Lopez-Martinez Irma                                                                                                                                                                                                      |
| EPI_ISL_455435                                                                                                                                                                                                                                                                                                 | Instituto de Diagnostico y Referencia Epidemiologicos (INDRE)                                                                  | Instituto de Diagnostico y Referencia Epidemiologicos (INDRE)                                                              | Garces-Ayala Fabiola, Taboada Ramirez Blanca, Ramirez-Gonzalez Ernesto, Araiza-Rodriguez Adnan , Mendieta-Condado Edgar, Rodriguez-Maldonado Abril, Wong-Arambula Claudia, Barrera-Badillo Gisela, Hernandez-Rivas Lucia, Lopez-Martinez Irma                                                                                                                                                                                                     |
| EPI_ISL_455436                                                                                                                                                                                                                                                                                                 | Instituto de Diagnostico y Referencia Epidemiologicos (INDRE)                                                                  | Instituto de Diagnostico y Referencia Epidemiologicos (INDRE)                                                              | Garces-Ayala Fabiola, Taboada Ramirez Blanca, Ramirez-Gonzalez Ernesto, Araiza-Rodriguez Adnan, Mendieta-Condado Edgar, Rodriguez-Maldonado Abril, Wong-Arambula Claudia, Barrera-Badillo Gisela, Hernandez-Rivas Lucia, Lopez-Martinez Irma                                                                                                                                                                                                      |
| EPI_ISL_455437, EPI_ISL_455438                                                                                                                                                                                                                                                                                 | Instituto de Diagnostico y Referencia Epidemiologicos (INDRE)                                                                  | Instituto de Diagnostico y Referencia Epidemiologicos (INDRE)                                                              | Araiza-Rodriguez Adnan, Garces-Ayala Fabiola, Ramirez-Gonzalez Ernesto, Mendieta-Condado Edgar, Rodriguez-Maldonado Abril, Wong-Arambula Claudia, Barrera-Badillo Gisela, Hernandez-Rivas Lucia, Lopez-Martinez Irma, Taboada Ramirez Blanca                                                                                                                                                                                                      |
| EPI_ISL_455439                                                                                                                                                                                                                                                                                                 | Instituto de Diagnostico y Referencia Epidemiologicos (INDRE)                                                                  | Instituto de Diagnostico y Referencia Epidemiologicos (INDRE)                                                              | Mendieta-Condado Edgar, Araiza-Rodriguez Adnan, Garces-Ayala Fabiola, Rodriguez-Maldonado Abril, Wong-Arambula Claudia, Barrera-Badillo Gisela, Hernandez-Rivas Lucia, Lopez-Martinez Irma                                                                                                                                                                                                                                                        |
| EPI_ISL_455455                                                                                                                                                                                                                                                                                                 | Instituto de Diagnostico y Referencia Epidemiologicos (INDRE)                                                                  | Instituto de Diagnostico y Referencia Epidemiologicos (INDRE)                                                              | Rodriguez-Maldonado Abril, Mendieta-Condado Edgar, Araiza-Rodriguez Adnan, Garces-Ayala Fabiola, Taboada Ramirez Blanca, Ramirez-Gonzalez Ernesto, Barrera-Badillo Gisela, Hernandez-Rivas Lucia, Lopez-Martinez Irma, Wong-Arambula Claudia                                                                                                                                                                                                      |
| EPI_ISL_455456                                                                                                                                                                                                                                                                                                 | Instituto de Diagnostico y Referencia Epidemiologicos (INDRE)                                                                  | Instituto de Diagnostico y Referencia Epidemiologicos (INDRE)                                                              | Rodriguez-Maldonado Abril, Mendieta-Condado Edgar, Araiza-Rodriguez Adnan, Garces-Ayala Fabiola, Taboada Ramirez Blanca, Ramirez-Gonzalez Ernesto, , Barrera-Badillo Gisela, Hernandez-Rivas Lucia, Lopez-Martinez Irma, Wong-Arambula Claudia                                                                                                                                                                                                    |
| EPI_ISL_455460, EPI_ISL_455461, EPI_ISL_455462, EPI_ISL_455463, EPI_ISL_455464, EPI_ISL_455465, EPI_ISL_455466, EPI_ISL_455467                                                                                                                                                                                 | Jiangxi Province Center for Disease Control and Prevention                                                                     | Jiangxi Province Center for Disease Control and Prevention                                                                 | JianXiong Li,Ying Xiong,Tian Gong,Yong Shi,Jun Zhou,Fang Xiao,ShiWen Liu,XiaoQing Liu,Guang Xu,Dajin Xiao,Xin Ran,YanNi Zhang                                                                                                                                                                                                                                                                                                                     |
| EPI_ISL_455468, EPI_ISL_455469, EPI_ISL_455470, EPI_ISL_455471, EPI_ISL_455472, EPI_ISL_455473, EPI_ISL_455474                                                                                                                                                                                                 | Laboratory for Respiratory Viruses, Cantacuzino National Military-Medical Institute for Research and Development               | Cantacuzino Institute                                                                                                      | M.Lazar, L.Ustea, A.Cretu, Tim Durfee                                                                                                                                                                                                                                                                                                                                                                                                             |
| EPI_ISL_455475, EPI_ISL_455476, EPI_ISL_455477                                                                                                                                                                                                                                                                 | Laboratory for Respiratory Viruses, Cantacuzino National Military-Medical Institute for Research and Development               | Cantacuzino Institute                                                                                                      | M.Lazar, L.Ustea, A.Cretu, T.Durfee                                                                                                                                                                                                                                                                                                                                                                                                               |
| EPI_ISL_455566, EPI_ISL_455567                                                                                                                                                                                                                                                                                 | Institute for Public Health                                                                                                    | Laboratory for advanced genomics                                                                                           | Filip Rokić, Lovro Trgovce-Greif, Neven Sučić, Tomislav Rukavina, Igor Jurak, Oliver Vugrek                                                                                                                                                                                                                                                                                                                                                       |
| EPI_ISL_455694, EPI_ISL_455695, EPI_ISL_455696, EPI_ISL_455697, EPI_ISL_455698, EPI_ISL_455699, EPI_ISL_455700, EPI_ISL_455701, EPI_ISL_455702, EPI_ISL_455703, EPI_ISL_455704, EPI_ISL_455705, EPI_ISL_455706, EPI_ISL_455707, EPI_ISL_455708, EPI_ISL_455709, EPI_ISL_455710, EPI_ISL_455711, EPI_ISL_455712 | National Hospital of Tropical Diseases                                                                                         | Oxford University Clinical Research Unit, Hanoi, Vietnam                                                                   | Nguyen Thi Tam, Van Dinh Trang, Nguyen Thu Trang, Nguyen Thi Ngoc Diep, Le Nguyen Minh Hoa, Pham Ngoc Thach, H. Rogier van Doorn, on behalf of the OUCRU COVID-19 research group                                                                                                                                                                                                                                                                  |
| EPI_ISL_455714, EPI_ISL_455718                                                                                                                                                                                                                                                                                 | National Hospital of Tropical Diseases                                                                                         | Oxford University Clinical Research Unit, Hanoi, Vietnam                                                                   | Nguyen Thi Tam, Van Dinh Trang, Nguyen Thi Hong Thuong, Vu Thi Ngoc Bich, Nguyen Thu Trang, Nguyen Thi Ngoc Diep, Le Nguyen Minh Hoa, Pham Ngoc Thach, H. Rogier van Doorn, on behalf of the OUCRU COVID-19 research group                                                                                                                                                                                                                        |
| EPI_ISL_455790                                                                                                                                                                                                                                                                                                 | Institute for Medical Research, Infectious Disease Research Centre, National Institutes of Health, Ministry of Health Malaysia | Malaysia Genome Institute                                                                                                  | Mohd Noor Mat Isa, Irni Suhayu Sapian, Yusuf Muhammad Noor, Jeyanthi Suppiah, Nurhezreen Md Iqbal, Enizza Kasim, Zarina Mohd Zawawi, Siti Noraini Othman, Mohd Faizal Abu Bakar, Shamsidar Sophie, Azrin Ahmad, Ravindran Thayan, Norazah Ahmad, Tahir Aris, Shahrul Hisham Zainal Ariffin                                                                                                                                                        |
| EPI_ISL_455791                                                                                                                                                                                                                                                                                                 | Institute for Medical Research, Infectious Disease Research Centre, National Institutes of Health, Ministry of Health Malaysia | Malaysia Genome Institute                                                                                                  | Mohd Noor Mat Isa, Irni Suhayu Sapian, Yusuf Muhammad Noor, Jeyanthi Suppiah, Nurhezreen Md Iqbal, Enizza Kasim, Zarina Mohd Zawawi, Siti Noraini Othman, Mohd Faizal Abu Bakar, Shamsidar Sophie, Azrin Ahmad, Ravindran Thayan, Norazah Ahmad, Tahir Aris, Shahrul Hisham Zainal Ariffin                                                                                                                                                        |
| EPI_ISL_455792                                                                                                                                                                                                                                                                                                 | Institute for Medical Research, Infectious Disease Research Centre, National Institutes of Health, Ministry of Health Malaysia | Malaysia Genome Institute                                                                                                  | Mohd Noor Mat Isa, Irni Suhayu Sapian, Yusuf Muhammad Noor, Jeyanthi Suppiah, Nurhezreen Md Iqbal, Enizza Kasim, Zarina Mohd Zawawi, Siti Noraini Othman, Mohd Faizal Abu Bakar, Shamsidar Sophie, Azrin Ahmad, Ravindran Thayan, Norazah Ahmad, Tahir Aris, Shahrul Hisham Zainal Ariffin                                                                                                                                                        |
| EPI_ISL_455793                                                                                                                                                                                                                                                                                                 | Institute for Medical Research, Infectious Disease Research Centre, National Institutes of Health, Ministry of Health Malaysia | Malaysia Genome Institute                                                                                                  | Mohd Noor Mat Isa, Irni Suhayu Sapian, Yusuf Muhammad Noor, Jeyanthi Suppiah, Nurhezreen Md Iqbal, Enizza Kasim, Zarina Mohd Zawawi, Siti Noraini Othman, Mohd Faizal Abu Bakar, Shamsidar Sophie, Azrin Ahmad, Ravindran Thayan, Norazah Ahmad, Tahir Aris, Shahrul Hisham Zainal Ariffin                                                                                                                                                        |

|                                                                                                                                                                                                                                                |                                                                                         |                                                                           |                                                                                                                                                                           |                                                                                                                                                                                                                                                                                                                                                                                                                                                                                                                                                                                                                                                                                                                                                                                                                                                                          |                                                                                                                                                                                                                                                                                                                                                                                                                                 |
|------------------------------------------------------------------------------------------------------------------------------------------------------------------------------------------------------------------------------------------------|-----------------------------------------------------------------------------------------|---------------------------------------------------------------------------|---------------------------------------------------------------------------------------------------------------------------------------------------------------------------|--------------------------------------------------------------------------------------------------------------------------------------------------------------------------------------------------------------------------------------------------------------------------------------------------------------------------------------------------------------------------------------------------------------------------------------------------------------------------------------------------------------------------------------------------------------------------------------------------------------------------------------------------------------------------------------------------------------------------------------------------------------------------------------------------------------------------------------------------------------------------|---------------------------------------------------------------------------------------------------------------------------------------------------------------------------------------------------------------------------------------------------------------------------------------------------------------------------------------------------------------------------------------------------------------------------------|
| EPI_ISL_456117, EPI_ISL_456119, EPI_ISL_456120, EPI_ISL_456126, EPI_ISL_456127, EPI_ISL_456138, EPI_ISL_456145, EPI_ISL_456146, EPI_ISL_456147, EPI_ISL_456148, EPI_ISL_456149, EPI_ISL_456150, EPI_ISL_456151, EPI_ISL_456152, EPI_ISL_456155 | see above                                                                               | Instituto Nacional de Salud - Unidad de Secuenciación y Análisis Genómico | Instituto Nacional de Salud, Universidad Cooperativa de Colombia, Instituto Alexander von Humboldt, Imperial College-London, London School of Hygiene & Tropical Medicine |                                                                                                                                                                                                                                                                                                                                                                                                                                                                                                                                                                                                                                                                                                                                                                                                                                                                          | Katherine Laiton-Donato, Diego A. Álvarez-Díaz, Carlos Franco-Muñoz, Jose A. Usme-Ciro, Gloria Puerto, Nicolas D. Franco-Sierra, Maily N. Gonzalez, Zulma M. Cucunubá, Christian Julian Villabona-Arenas, Liz Villabona-Arenas, Sussy Echeverria, Astrid C. Flórez, Sergio Gomez-Rangel, Luz Dary Rodriguez, Juliana Barbosa, Erika Ospitia, Diana Marcela Walteros-Acero, Martha Lucia Ospina Martinez, Marcela Mercado-Reyes. |
| EPI_ISL_457702                                                                                                                                                                                                                                 | Oman-NIC                                                                                |                                                                           | Microbiology laboratory- Sultan Qaboos University Hospital                                                                                                                | Fahad Zadjali, Samira Al-Marugi, Amina Al Jardani, Khulood Al-Mammary, Hanan Al-kind, Fatma BaAlawi, Hamida AL Barwani, Zeyana AL-Dahmani, Intisar Al-Shukri, Aisha Al-Busaidi, Aisha Al-Amri, Ahlam Al-Amri, Mohammed Al-Tobi, Samiha Al Kharusi, Abdulla Balkhair                                                                                                                                                                                                                                                                                                                                                                                                                                                                                                                                                                                                      |                                                                                                                                                                                                                                                                                                                                                                                                                                 |
| EPI_ISL_457703                                                                                                                                                                                                                                 | Oman-NIC                                                                                |                                                                           | Department of Microbiology and Immunology- SQUH                                                                                                                           | Fahad Zadjali, Samira Al-Marugi, Amina Al Jardani, Khulood Al-Mammary, Hanan Al-kind, Fatma BaAlawi, Hamida AL Barwani, Zeyana AL-Dahmani, Intisar Al-Shukri, Aisha Al-Busaidi, Aisha Al-Amri, Ahlam Al-Amri, Mohammed Al-Tobi, Samiha Al Kharusi, Abdulla Balkhair                                                                                                                                                                                                                                                                                                                                                                                                                                                                                                                                                                                                      |                                                                                                                                                                                                                                                                                                                                                                                                                                 |
| EPI_ISL_457705                                                                                                                                                                                                                                 | OMAN-NIC                                                                                |                                                                           | Department of Microbiology and Immunology- SQUH                                                                                                                           | Fahad Zadjali, Samira Al-Marugi, Amina Al Jardani, Khulood Al-Mammary, Hanan Al-kind, Fatma BaAlawi, Hamida AL Barwani, Zeyana AL-Dahmani, Intisar Al-Shukri, Aisha Al-Busaidi, Aisha Al-Amri, Ahlam Al-Amri, Mohammed Al-Tobi, Samiha Al Kharusi, Abdulla Balkhair                                                                                                                                                                                                                                                                                                                                                                                                                                                                                                                                                                                                      |                                                                                                                                                                                                                                                                                                                                                                                                                                 |
| EPI_ISL_457707                                                                                                                                                                                                                                 | Oman-NIC                                                                                |                                                                           | Department of Microbiology and Immunology- SQUH                                                                                                                           | Fahad Zadjali, Samira Al-Marugi, Amina Al Jardani, Khulood Al-Mammary, Hanan Al-kind, Fatma BaAlawi, Hamida AL Barwani, Zeyana AL-Dahmani, Intisar Al-Shukri, Aisha Al-Busaidi, Aisha Al-Amri, Ahlam Al-Amri, Mohammed Al-Tobi, Samiha Al Kharusi, Abdulla Balkhair                                                                                                                                                                                                                                                                                                                                                                                                                                                                                                                                                                                                      |                                                                                                                                                                                                                                                                                                                                                                                                                                 |
| EPI_ISL_457726, EPI_ISL_457730                                                                                                                                                                                                                 | TSGH-CP molecular lab                                                                   |                                                                           | TSGH-CP molecular lab                                                                                                                                                     | Cheng-Lih Perng, Ming-Jr JIAN, Chih-Kai Chang, Jung-Chung Lin, Kuo-Ming Yeh, Chien-Wen Chen, Sheng-Kang Chiu, Hsing-Yi Chung, Shih-Hung Tsai, Kuo-Sheng Hung, Tien-Yao Chang, Feng-Yee Chang, Hung-Sheng Shang                                                                                                                                                                                                                                                                                                                                                                                                                                                                                                                                                                                                                                                           |                                                                                                                                                                                                                                                                                                                                                                                                                                 |
| EPI_ISL_457750                                                                                                                                                                                                                                 | Centogene AG                                                                            |                                                                           | Centogene AG                                                                                                                                                              | Prof. Dr. Peter Bauer, Dr. Krishna Kumar Kandaswamy                                                                                                                                                                                                                                                                                                                                                                                                                                                                                                                                                                                                                                                                                                                                                                                                                      |                                                                                                                                                                                                                                                                                                                                                                                                                                 |
| EPI_ISL_457824                                                                                                                                                                                                                                 | Bezmi'alem Vakif University, Dept Microbiology, Medical School, Fatih, Istanbul, Turkey |                                                                           | Bezmi'alem Vakif University, Medical School & Beykoz Institute of Life Sciences & Biotechnology                                                                           | Mehmet Z. Doymaz, Merve Kalkan, Nesibe Cetin, Elif Karaaslan, Bilge Sumbul, Filiz Guney                                                                                                                                                                                                                                                                                                                                                                                                                                                                                                                                                                                                                                                                                                                                                                                  |                                                                                                                                                                                                                                                                                                                                                                                                                                 |
| EPI_ISL_457997                                                                                                                                                                                                                                 | Oman-NIC                                                                                |                                                                           | Oman-NIC                                                                                                                                                                  | Samira Al-Marugi, Fahad Zadjali, Amina Al Jardani, Khulood Al-Mammary, Hanan Al-kind, Fatma BaAlawi, Hamida AL Barwani, Zeyana AL-Dahmani, Intisar Al-Shukri, Aisha Al-Busaidi, Aisha Al-Amri, Ahlam Al-Amri, Mohammed Al-Tobi, Samiha Al Kharusi, Abdulla Balkhair                                                                                                                                                                                                                                                                                                                                                                                                                                                                                                                                                                                                      |                                                                                                                                                                                                                                                                                                                                                                                                                                 |
| EPI_ISL_458029                                                                                                                                                                                                                                 | TSGH-CP molecular lab                                                                   |                                                                           | TSGH-CP molecular lab                                                                                                                                                     | Cheng-Lih Perng, Ming-Jr JIAN, Chih-Kai Chang, Jung-Chung Lin, Kuo-Ming Yeh, Chien-Wen Chen, Sheng-Kang Chiu, Hsing-Yi Chung, Shih-Hung Tsai, Kuo-Sheng Hung, Tien-Yao Chang, Feng-Yee Chang, Hung-Sheng Shang                                                                                                                                                                                                                                                                                                                                                                                                                                                                                                                                                                                                                                                           |                                                                                                                                                                                                                                                                                                                                                                                                                                 |
| EPI_ISL_458079                                                                                                                                                                                                                                 | Mitra Keluarga Hospital Kenjeran                                                        |                                                                           | Institute of Tropical Disease, Universitas Airlangga                                                                                                                      | Aldise M Nastri, Jezy R Dewantari, Rima R Prasetya, Krisnoadi Rahardjo, Anastasia W Jefuna, Gatot Soegiarto, Laksmi Wulandari, Retno A Setyoningrum, Resti Yudhawati, Yohko K Shimizu, Mitsuhiro Nishimura, Yasuko Mori, Soetjipto, Kazufumi Shimizu, Maria I Lusida                                                                                                                                                                                                                                                                                                                                                                                                                                                                                                                                                                                                     |                                                                                                                                                                                                                                                                                                                                                                                                                                 |
| EPI_ISL_458081                                                                                                                                                                                                                                 | RSUD Bangil Pasuruan                                                                    |                                                                           | Institute of Tropical Disease, Universitas Airlangga                                                                                                                      | Jezy R Dewantari, Rima R Prasetya, Krisnoadi Rahardjo, Aldise M Nastri, Arma Roosalina, Gatot Soegiarto, Laksmi Wulandari, Retno A Setyoningrum, Resti Yudhawati, Yohko K Shimizu, Mitsuhiro Nishimura, Yasuko Mori, Soetjipto, Kazufumi Shimizu, Maria I Lusida                                                                                                                                                                                                                                                                                                                                                                                                                                                                                                                                                                                                         |                                                                                                                                                                                                                                                                                                                                                                                                                                 |
| EPI_ISL_458083                                                                                                                                                                                                                                 | Adi Husada Udaan Hospital                                                               |                                                                           | Institute of Tropical Disease, Universitas Airlangga                                                                                                                      | Rima R Prasetya, Krisnoadi Rahardjo, Aldise M Nastri, Jezy R Dewantari, Irawati Marga, Gatot Soegiarto, Laksmi Wulandari, Retno A Setyoningrum, Resti Yudhawati, Yohko K Shimizu, Mitsuhiro Nishimura, Yasuko Mori, Soetjipto, Kazufumi Shimizu, Maria I Lusida                                                                                                                                                                                                                                                                                                                                                                                                                                                                                                                                                                                                          |                                                                                                                                                                                                                                                                                                                                                                                                                                 |
| EPI_ISL_458086                                                                                                                                                                                                                                 | B.J. Medical College and Civil hospital                                                 |                                                                           | Gujarat Biotechnology Research Centre                                                                                                                                     | Dhaval Vaghela, Ramesh Patel, Pranay Shah, Kamlesh J Upadhyay, Ramesh Pandit, Tejas Shah, Ankit Hinsu, Pritesh Sabara, Apurvasinh Puvar, Janvi Ravai, Zarna Patel, Monika Gandhi, Pinal Trivedi, Maharshi Pandya, Amit Kanani, Nidhi Patel, Nitin Savaliya, Raghawendra Kumar, Dinesh Kumar, Zuber Saiyed, Komal Patel, Labdhi Pandya, Snehal Bagatharia, Dhaval Vaghela, Ramesh Patel, Fenil Patel, Bhavesh Modi, Gaurishankar Shrimali, R D Dixit, A M Kadri, Umang Mishra, Chaitanya Joshi, Madhvi Joshi                                                                                                                                                                                                                                                                                                                                                              |                                                                                                                                                                                                                                                                                                                                                                                                                                 |
| EPI_ISL_458087                                                                                                                                                                                                                                 | B.J. Medical College and Civil hospital                                                 |                                                                           | Gujarat Biotechnology Research Centre                                                                                                                                     | Ramesh Patel, Pranay Shah, Kamlesh J Upadhyay, Ramesh Pandit, Tejas Shah, Ankit Hinsu, Pritesh Sabara, Apurvasinh Puvar, Janvi Ravai, Zarna Patel, Monika Gandhi, Pinal Trivedi, Maharshi Pandya, Amit Kanani, Nidhi Patel, Nitin Savaliya, Raghawendra Kumar, Dinesh Kumar, Zuber Saiyed, Komal Patel, Labdhi Pandya, Snehal Bagatharia, Dhaval Vaghela, Afzal Ansari, Bhavesh Modi, Gaurishankar Shrimali, R D Dixit, A M Kadri, Umang Mishra, Chaitanya Joshi, Madhvi Joshi                                                                                                                                                                                                                                                                                                                                                                                           |                                                                                                                                                                                                                                                                                                                                                                                                                                 |
| EPI_ISL_458088                                                                                                                                                                                                                                 | B.J. Medical College and Civil hospital                                                 |                                                                           | Gujarat Biotechnology Research Centre                                                                                                                                     | Pranay Shah, Kamlesh J Upadhyay, Ramesh Pandit, Tejas Shah, Ankit Hinsu, Pritesh Sabara, Apurvasinh Puvar, Janvi Ravai, Zarna Patel, Monika Gandhi, Pinal Trivedi, Maharshi Pandya, Amit Kanani, Nidhi Patel, Nitin Savaliya, Raghawendra Kumar, Dinesh Kumar, Zuber Saiyed, Komal Patel, Labdhi Pandya, Snehal Bagatharia, Dhaval Vaghela, Ramesh Patel, Fenil Patel, Bhavesh Modi, Gaurishankar Shrimali, R D Dixit, A M Kadri, Umang Mishra, Chaitanya Joshi, Madhvi Joshi                                                                                                                                                                                                                                                                                                                                                                                            |                                                                                                                                                                                                                                                                                                                                                                                                                                 |
| EPI_ISL_458089                                                                                                                                                                                                                                 | B.J. Medical College and Civil hospital                                                 |                                                                           | Gujarat Biotechnology Research Centre                                                                                                                                     | Pranay Shah, Kamlesh J Upadhyay, Ramesh Pandit, Tejas Shah, Ankit Hinsu, Pritesh Sabara, Apurvasinh Puvar, Janvi Ravai, Zarna Patel, Monika Gandhi, Pinal Trivedi, Maharshi Pandya, Amit Kanani, Nidhi Patel, Nitin Savaliya, Raghawendra Kumar, Dinesh Kumar, Zuber Saiyed, Komal Patel, Labdhi Pandya, Snehal Bagatharia, Dhaval Vaghela, Ramesh Patel, Neelam Nathani, Bhavesh Modi, Gaurishankar Shrimali, R D Dixit, A M Kadri, Umang Mishra, Chaitanya Joshi, Madhvi Joshi                                                                                                                                                                                                                                                                                                                                                                                         |                                                                                                                                                                                                                                                                                                                                                                                                                                 |
| EPI_ISL_458090                                                                                                                                                                                                                                 | B.J. Medical College and Civil hospital                                                 |                                                                           | Gujarat Biotechnology Research Centre                                                                                                                                     | Kamlesh J Upadhyay, Ramesh Pandit, Tejas Shah, Ankit Hinsu, Pritesh Sabara, Apurvasinh Puvar, Janvi Ravai, Zarna Patel, Monika Gandhi, Pinal Trivedi, Maharshi Pandya, Amit Kanani, Nidhi Patel, Nitin Savaliya, Raghawendra Kumar, Dinesh Kumar, Zuber Saiyed, Komal Patel, Labdhi Pandya, Snehal Bagatharia, Dhaval Vaghela, Ramesh Patel, Pranay Shah, Armi Chaudhari, Bhavesh Modi, Gaurishankar Shrimali, R D Dixit, A M Kadri, Umang Mishra, Chaitanya Joshi, Madhvi Joshi                                                                                                                                                                                                                                                                                                                                                                                         |                                                                                                                                                                                                                                                                                                                                                                                                                                 |
| EPI_ISL_458091                                                                                                                                                                                                                                 | B.J. Medical College and Civil hospital                                                 |                                                                           | Gujarat Biotechnology Research Centre                                                                                                                                     | Maharshi Pandya, Amit Kanani, Nidhi Patel, Nitin Savaliya, Raghawendra Kumar, Dinesh Kumar, Zuber Saiyed, Komal Patel, Labdhi Pandya, Snehal Bagatharia, Dhaval Vaghela, Ramesh Patel, Pranay Shah, Kamlesh J Upadhyay, Ramesh Pandit, Tejas Shah, Ankit Hinsu, Pritesh Sabara, Apurvasinh Puvar, Janvi Ravai, Zarna Patel, Monika Gandhi, Pinal Trivedi, Maharshi Pandya, Amit Kanani, Nidhi Patel, Nitin Savaliya, Raghawendra Kumar, Dinesh Kumar, Zuber Saiyed, Komal Patel, Labdhi Pandya, Snehal Bagatharia, Dhaval Vaghela, Ramesh Patel, Pranay Shah, Kamlesh J Upadhyay, Ramesh Pandit, Tejas Shah, Ankit Hinsu, Pritesh Sabara, Apurvasinh Puvar, Janvi Ravai, Zarna Patel, Monika Gandhi, Pinal Trivedi, Maharshi Pandya, Amit Kanani, Siddhant Kumar, Bhavesh Modi, Gaurishankar Shrimali, R D Dixit, A M Kadri, Umang Mishra, Chaitanya Joshi, Madhvi Joshi |                                                                                                                                                                                                                                                                                                                                                                                                                                 |
| EPI_ISL_458092                                                                                                                                                                                                                                 | B.J. Medical College and Civil hospital                                                 |                                                                           | Gujarat Biotechnology Research Centre                                                                                                                                     | Amit Kanani, Nidhi Patel, Nitin Savaliya, Raghawendra Kumar, Dinesh Kumar, Zuber Saiyed, Komal Patel, Labdhi Pandya, Snehal Bagatharia, Dhaval Vaghela, Ramesh Patel, Pranay Shah, Kamlesh J Upadhyay, Ramesh Pandit, Tejas Shah, Ankit Hinsu, Pritesh Sabara, Apurvasinh Puvar, Janvi Ravai, Zarna Patel, Monika Gandhi, Pinal Trivedi, Maharshi Pandya, Amit Kanani, Siddhant Kumar, Bhavesh Modi, Gaurishankar Shrimali, R D Dixit, A M Kadri, Umang Mishra, Chaitanya Joshi, Madhvi Joshi                                                                                                                                                                                                                                                                                                                                                                            |                                                                                                                                                                                                                                                                                                                                                                                                                                 |
| EPI_ISL_458093                                                                                                                                                                                                                                 | B.J. Medical College and Civil hospital                                                 |                                                                           | Gujarat Biotechnology Research Centre                                                                                                                                     | Nidhi Patel, Nitin Savaliya, Raghawendra Kumar, Dinesh Kumar, Zuber Saiyed, Komal Patel, Labdhi Pandya, Snehal Bagatharia, Dhaval Vaghela, Ramesh Patel, Pranay Shah, Kamlesh J Upadhyay, Ramesh Pandit, Tejas Shah, Ankit Hinsu, Pritesh Sabara, Apurvasinh Puvar, Janvi Ravai, Zarna Patel, Monika Gandhi, Pinal Trivedi, Maharshi Pandya, Amit Kanani, Siddhant Kumar, Bhavesh Modi, Gaurishankar Shrimali, R D Dixit, A M Kadri, Umang Mishra, Chaitanya Joshi, Madhvi Joshi                                                                                                                                                                                                                                                                                                                                                                                         |                                                                                                                                                                                                                                                                                                                                                                                                                                 |
| EPI_ISL_458094                                                                                                                                                                                                                                 | B.J. Medical College and Civil hospital                                                 |                                                                           | Gujarat Biotechnology Research Centre                                                                                                                                     | Nitin Savaliya, Raghawendra Kumar, Dinesh Kumar, Zuber Saiyed, Komal Patel, Labdhi Pandya, Snehal Bagatharia, Dhaval Vaghela, Ramesh Patel, Pranay Shah, Kamlesh J Upadhyay, Ramesh Pandit, Tejas Shah, Ankit Hinsu, Pritesh Sabara, Apurvasinh Puvar, Janvi Ravai, Zarna Patel, Monika Gandhi, Pinal Trivedi, Maharshi Pandya, Amit Kanani, Nidhi Patel, Priyanka P Vatsa, Bhavesh Modi, Gaurishankar Shrimali, R D Dixit, A M Kadri, Umang Mishra, Chaitanya Joshi, Madhvi Joshi                                                                                                                                                                                                                                                                                                                                                                                       |                                                                                                                                                                                                                                                                                                                                                                                                                                 |
| EPI_ISL_458095                                                                                                                                                                                                                                 | B.J. Medical College and Civil hospital                                                 |                                                                           | Gujarat Biotechnology Research Centre                                                                                                                                     | Raghawendra Kumar, Dinesh Kumar, Zuber Saiyed, Komal Patel, Labdhi Pandya, Snehal Bagatharia, Dhaval Vaghela, Ramesh Patel, Pranay Shah, Kamlesh J Upadhyay, Ramesh Pandit, Tejas Shah, Ankit Hinsu, Pritesh Sabara, Apurvasinh Puvar, Janvi Ravai, Zarna Patel, Monika Gandhi, Pinal Trivedi, Maharshi Pandya, Amit Kanani, Nidhi Patel, Priyanka P Doshi, Bhavesh Modi, Gaurishankar Shrimali, R D Dixit, A M Kadri, Umang Mishra, Chaitanya Joshi, Madhvi Joshi                                                                                                                                                                                                                                                                                                                                                                                                       |                                                                                                                                                                                                                                                                                                                                                                                                                                 |
| EPI_ISL_458096                                                                                                                                                                                                                                 | B.J. Medical College and Civil hospital                                                 |                                                                           | Gujarat Biotechnology Research Centre                                                                                                                                     | Dinesh Kumar, Zuber Saiyed, Komal Patel, Labdhi Pandya, Snehal Bagatharia, Dhaval Vaghela, Ramesh Patel, Pranay Shah, Kamlesh J Upadhyay, Ramesh Pandit, Tejas Shah, Ankit Hinsu, Pritesh Sabara, Apurvasinh Puvar, Janvi Ravai, Zarna Patel, Monika Gandhi, Pinal Trivedi, Maharshi Pandya, Amit Kanani, Nidhi Patel, Nitin Savaliya, Raghawendra Kumar, Akanksha Verma, Bhavesh Modi, Gaurishankar Shrimali, R D Dixit, A M Kadri, Umang Mishra, Chaitanya Joshi, Madhvi Joshi                                                                                                                                                                                                                                                                                                                                                                                         |                                                                                                                                                                                                                                                                                                                                                                                                                                 |
| EPI_ISL_458097                                                                                                                                                                                                                                 | B.J. Medical College and Civil hospital                                                 |                                                                           | Gujarat Biotechnology Research Centre                                                                                                                                     | Zuber Saiyed, Komal Patel, Labdhi Pandya, Snehal Bagatharia, Dhaval Vaghela, Ramesh Patel, Pranay Shah, Kamlesh J Upadhyay, Ramesh Pandit, Tejas Shah, Ankit Hinsu, Pritesh Sabara, Apurvasinh Puvar, Janvi Ravai, Zarna Patel, Monika Gandhi, Pinal Trivedi, Maharshi Pandya, Amit Kanani, Nidhi Patel, Nitin Savaliya, Raghawendra Kumar, Dinesh Kumar, Zuber Saiyed, Komal Patel, Labdhi Pandya, Snehal Bagatharia, Dhaval Vaghela, Ramesh Patel, Pranay Shah, Kamlesh J Upadhyay, Ramesh Pandit, Tejas Shah, Ankit Hinsu, Pritesh Sabara, Apurvasinh Puvar, Janvi Ravai, Zarna Patel, Monika Gandhi, Pinal Trivedi, Maharshi Pandya, Amit Kanani, Siddhant Kumar, Bhavesh Modi, Gaurishankar Shrimali, R D Dixit, A M Kadri, Umang Mishra, Chaitanya Joshi, Madhvi Joshi                                                                                             |                                                                                                                                                                                                                                                                                                                                                                                                                                 |
| EPI_ISL_458098                                                                                                                                                                                                                                 | B.J. Medical College and Civil hospital                                                 |                                                                           | Gujarat Biotechnology Research Centre                                                                                                                                     | Komal Patel, Labdhi Pandya, Snehal Bagatharia, Dhaval Vaghela, Ramesh Patel, Pranay Shah, Kamlesh J Upadhyay, Ramesh Pandit, Tejas Shah, Ankit Hinsu, Pritesh Sabara, Apurvasinh Puvar, Janvi Ravai, Zarna Patel, Monika Gandhi, Pinal Trivedi, Maharshi Pandya, Amit Kanani, Nidhi Patel, Nitin Savaliya, Raghawendra Kumar, Dinesh Kumar, Zuber Saiyed, Praga Sharma, Bhavesh Modi, Gaurishankar Shrimali, R D Dixit, A M Kadri, Umang Mishra, Chaitanya Joshi, Madhvi Joshi                                                                                                                                                                                                                                                                                                                                                                                           |                                                                                                                                                                                                                                                                                                                                                                                                                                 |
| EPI_ISL_458099                                                                                                                                                                                                                                 | B.J. Medical College and Civil hospital                                                 |                                                                           | Gujarat Biotechnology Research Centre                                                                                                                                     | Labdhi Pandya, Snehal Bagatharia, Dhaval Vaghela, Ramesh Patel, Pranay Shah, Kamlesh J Upadhyay, Ramesh Pandit, Tejas Shah, Ankit Hinsu, Pritesh Sabara, Apurvasinh Puvar, Janvi Ravai, Zarna Patel, Monika Gandhi, Pinal Trivedi, Maharshi Pandya, Amit Kanani, Nidhi Patel, Nitin Savaliya, Raghawendra Kumar, Dinesh Kumar, Zuber Saiyed, Komal Patel, Neha Rajpara, Bhavesh Modi, Gaurishankar Shrimali, R D Dixit, A M Kadri, Umang Mishra, Chaitanya Joshi, Madhvi Joshi                                                                                                                                                                                                                                                                                                                                                                                           |                                                                                                                                                                                                                                                                                                                                                                                                                                 |
| EPI_ISL_458100                                                                                                                                                                                                                                 | B.J. Medical College and Civil hospital                                                 |                                                                           | Gujarat Biotechnology Research Centre                                                                                                                                     | Snehal Bagatharia, Dhaval Vaghela, Ramesh Patel, Pranay Shah, Kamlesh J Upadhyay, Ramesh Pandit, Tejas Shah, Ankit Hinsu, Pritesh Sabara, Apurvasinh Puvar, Janvi Ravai, Zarna Patel, Monika Gandhi, Pinal Trivedi, Maharshi Pandya, Amit Kanani, Nidhi Patel, Nitin Savaliya, Raghawendra Kumar, Dinesh Kumar, Zuber Saiyed, Komal Patel, Labdhi Pandya, Afzal Ansari, Bhavesh Modi, Gaurishankar Shrimali, R D Dixit, A M Kadri, Umang Mishra, Chaitanya Joshi, Madhvi Joshi                                                                                                                                                                                                                                                                                                                                                                                           |                                                                                                                                                                                                                                                                                                                                                                                                                                 |
| EPI_ISL_458101                                                                                                                                                                                                                                 | B.J. Medical College and Civil hospital                                                 |                                                                           | Gujarat Biotechnology Research Centre                                                                                                                                     | Dhaval Vaghela, Ramesh Patel, Pranay Shah, Kamlesh J Upadhyay, Ramesh Pandit, Tejas Shah, Ankit Hinsu, Pritesh Sabara, Apurvasinh Puvar, Janvi Ravai, Zarna Patel, Monika Gandhi, Pinal Trivedi, Maharshi Pandya, Amit Kanani, Nidhi Patel, Nitin Savaliya, Raghawendra Kumar, Dinesh Kumar, Zuber Saiyed, Komal Patel, Labdhi Pandya, Snehal Bagatharia, Dhaval Vaghela, Ramesh Patel, Pranay Shah, Kamlesh J Upadhyay, Ramesh Pandit, Tejas Shah, Ankit Hinsu, Pritesh Sabara, Apurvasinh Puvar, Janvi Ravai, Zarna Patel, Monika Gandhi, Pinal Trivedi, Maharshi Pandya, Amit Kanani, Siddhant Kumar, Bhavesh Modi, Gaurishankar Shrimali, R D Dixit, A M Kadri, Umang Mishra, Chaitanya Joshi, Madhvi Joshi                                                                                                                                                          |                                                                                                                                                                                                                                                                                                                                                                                                                                 |
| EPI_ISL_458102                                                                                                                                                                                                                                 | B.J. Medical College and Civil hospital                                                 |                                                                           | Gujarat Biotechnology Research Centre                                                                                                                                     | Ramesh Patel, Pranay Shah, Kamlesh J Upadhyay, Ramesh Pandit, Tejas Shah, Ankit Hinsu, Pritesh Sabara, Apurvasinh Puvar, Janvi Ravai, Zarna Patel, Monika Gandhi, Pinal Trivedi, Maharshi Pandya, Amit Kanani, Nidhi Patel, Nitin Savaliya, Raghawendra Kumar, Dinesh Kumar, Zuber Saiyed, Komal Patel, Labdhi Pandya, Snehal Bagatharia, Dhaval Vaghela, Neelam Nathani, Bhavesh Modi, Gaurishankar Shrimali, R D Dixit, A M Kadri, Umang Mishra, Chaitanya Joshi, Madhvi Joshi                                                                                                                                                                                                                                                                                                                                                                                         |                                                                                                                                                                                                                                                                                                                                                                                                                                 |
| EPI_ISL_458103                                                                                                                                                                                                                                 | Gujarat Biotechnology Research Centre                                                   |                                                                           | Gujarat Biotechnology Research Centre                                                                                                                                     | Ramesh Pandit, Tejas Shah, Ankit Hinsu, Pritesh Sabara, Apurvasinh Puvar, Janvi Ravai, Zarna Patel, Monika Gandhi, Pinal Trivedi, Maharshi Pandya, Amit Kanani, Nidhi Patel, Nitin Savaliya, Raghawendra Kumar, Dinesh Kumar, Zuber Saiyed, Komal Patel, Labdhi Pandya, Snehal Bagatharia, Armi Chaudhari, Bhavesh Modi, Gaurishankar Shrimali, R D Dixit, A M Kadri, Umang Mishra, Chaitanya Joshi, Madhvi Joshi                                                                                                                                                                                                                                                                                                                                                                                                                                                        |                                                                                                                                                                                                                                                                                                                                                                                                                                 |
| EPI_ISL_458104                                                                                                                                                                                                                                 | Gujarat Biotechnology Research Centre                                                   |                                                                           | Gujarat Biotechnology Research Centre                                                                                                                                     | Tejas Shah, Ankit Hinsu, Pritesh Sabara, Apurvasinh Puvar, Janvi Ravai, Zarna Patel, Monika Gandhi, Pinal Trivedi, Maharshi Pandya, Amit Kanani, Nidhi Patel, Nitin Savaliya, Raghawendra Kumar, Dinesh Kumar, Zuber Saiyed, Komal Patel, Labdhi Pandya, Snehal Bagatharia, Ramesh Pandit, Bhavya Jindal, Bhavesh Modi, Gaurishankar Shrimali, R D Dixit, A M Kadri, Umang Mishra, Chaitanya Joshi, Madhvi Joshi                                                                                                                                                                                                                                                                                                                                                                                                                                                         |                                                                                                                                                                                                                                                                                                                                                                                                                                 |
| EPI_ISL_458105                                                                                                                                                                                                                                 | Gujarat Biotechnology Research Centre                                                   |                                                                           | Gujarat Biotechnology Research Centre                                                                                                                                     | Ankit Hinsu, Pritesh Sabara, Apurvasinh Puvar, Janvi Ravai, Zarna Patel, Monika Gandhi, Pinal Trivedi, Maharshi Pandya, Amit Kanani, Nidhi Patel, Nitin Savaliya, Raghawendra Kumar, Dinesh Kumar, Zuber Saiyed, Komal Patel, Labdhi Pandya, Snehal Bagatharia, Ramesh Pandit, Tejas Shah, Ankit Hinsu, Siddhant Kumar, Bhavesh Modi, Gaurishankar Shrimali, R D Dixit, A M Kadri, Umang Mishra, Chaitanya Joshi, Madhvi Joshi                                                                                                                                                                                                                                                                                                                                                                                                                                           |                                                                                                                                                                                                                                                                                                                                                                                                                                 |
| EPI_ISL_458106                                                                                                                                                                                                                                 | Gujarat Biotechnology Research Centre                                                   |                                                                           | Gujarat Biotechnology Research Centre                                                                                                                                     | Pritesh Sabara, Apurvasinh Puvar, Janvi Ravai, Zarna Patel, Monika Gandhi, Pinal Trivedi, Maharshi Pandya, Amit Kanani, Nidhi Patel, Nitin Savaliya, Raghawendra Kumar, Dinesh Kumar, Zuber Saiyed, Komal Patel, Labdhi Pandya, Snehal Bagatharia, Ramesh Pandit, Tejas Shah, Ankit Hinsu, Siddhant Kumar, Bhavesh Modi, Gaurishankar Shrimali, R D Dixit, A M Kadri, Umang Mishra, Chaitanya Joshi, Madhvi Joshi                                                                                                                                                                                                                                                                                                                                                                                                                                                        |                                                                                                                                                                                                                                                                                                                                                                                                                                 |
| EPI_ISL_458107                                                                                                                                                                                                                                 | Gujarat Biotechnology Research Centre                                                   |                                                                           | Gujarat Biotechnology Research Centre                                                                                                                                     | Apurvasinh Puvar, Janvi Ravai, Zarna Patel, Monika Gandhi, Pinal Trivedi, Maharshi Pandya, Amit Kanani, Nidhi Patel, Nitin Savaliya, Raghawendra Kumar, Dinesh Kumar, Zuber Saiyed, Komal Patel, Labdhi Pandya, Snehal Bagatharia, Ramesh Pandit, Tejas Shah, Ankit Hinsu, Pritesh Sabara, Priyanka P Vatsa, Bhavesh Modi, Gaurishankar Shrimali, R D Dixit, A M Kadri, Umang Mishra, Chaitanya Joshi, Madhvi Joshi                                                                                                                                                                                                                                                                                                                                                                                                                                                      |                                                                                                                                                                                                                                                                                                                                                                                                                                 |
| EPI_ISL_458111                                                                                                                                                                                                                                 | Gujarat Biotechnology Research Centre                                                   |                                                                           | Gujarat Biotechnology Research Centre                                                                                                                                     | Pinal Trivedi, Maharshi Pandya, Amit Kanani, Nidhi Patel, Nitin Savaliya, Raghawendra Kumar, Dinesh Kumar, Zuber Saiyed, Komal Patel, Labdhi Pandya, Snehal Bagatharia, Ramesh                                                                                                                                                                                                                                                                                                                                                                                                                                                                                                                                                                                                                                                                                           |                                                                                                                                                                                                                                                                                                                                                                                                                                 |

|                                                                                                                                                                                                                                                                                                                                                |                                                                                                                                |                                                                                                                                |                                                                                                                                                                                                                                                                                                                                                                                                                          |
|------------------------------------------------------------------------------------------------------------------------------------------------------------------------------------------------------------------------------------------------------------------------------------------------------------------------------------------------|--------------------------------------------------------------------------------------------------------------------------------|--------------------------------------------------------------------------------------------------------------------------------|--------------------------------------------------------------------------------------------------------------------------------------------------------------------------------------------------------------------------------------------------------------------------------------------------------------------------------------------------------------------------------------------------------------------------|
| EPI_ISL_458112                                                                                                                                                                                                                                                                                                                                 | Gujarat Biotechnology Research Centre                                                                                          | Gujarat Biotechnology Research Centre                                                                                          | Pandit, Tejas Shah, Ankit Hinsu, Pritesh Sabara, Apurvasinh Puvar, Janvi Raval, Zarna Patel, Monika Gandhi, Pragma Sharma, Bhavesh Modi, Gaurishankar Shrimali, R D Dixit, A M Kadri, Umang Mishra, Chaitanya Joshi, Madhvi Joshi, . . . .                                                                                                                                                                               |
| EPI_ISL_458113                                                                                                                                                                                                                                                                                                                                 | Gujarat Biotechnology Research Centre                                                                                          | Gujarat Biotechnology Research Centre                                                                                          | Maharshi Pandya, Amit Kanani, Nidhi Patel, Nitin Savaliya, Raghawendra Kumar, Dinesh Kumar, Zuber Saiyed, Komal Patel, Labdhi Pandya, Snehal Bagatharia, Ramesh Pandit, Tejas Shah, Ankit Hinsu, Pritesh Sabara, Apurvasinh Puvar, Janvi Raval, Zarna Patel, Monika Gandhi, Pinal Trivedi, Neha Rajpara, Bhavesh Modi, Gaurishankar Shrimali, R D Dixit, A M Kadri, Umang Mishra, Chaitanya Joshi, Madhvi Joshi, . . . . |
| EPI_ISL_458116, EPI_ISL_458117, EPI_ISL_458118, EPI_ISL_458120                                                                                                                                                                                                                                                                                 | Oman National Influenza Centre                                                                                                 | Department of Microbiology and Immunology-SQUH                                                                                 | Amit Kanani, Nidhi Patel, Nitin Savaliya, Raghawendra Kumar, Dinesh Kumar, Zuber Saiyed, Komal Patel, Labdhi Pandya, Snehal Bagatharia, Ramesh Pandit, Tejas Shah, Ankit Hinsu, Pritesh Sabara, Apurvasinh Puvar, Janvi Raval, Zarna Patel, Monika Gandhi, Pinal Trivedi, Maharshi Pandya, Afzal Ansari, Bhavesh Modi, Gaurishankar Shrimali, R D Dixit, A M Kadri, Umang Mishra, Chaitanya Joshi, Madhvi Joshi, . . . . |
| EPI_ISL_458133                                                                                                                                                                                                                                                                                                                                 | National Institute of Biotechnology                                                                                            | Bioinformatics Division, National Institute of Biotechnology                                                                   | Fahad Zadjali, Samira Al-Maruqi, Amina Al Jardani, Khulood Al-Mammary, Hanan Al-kind, Fatma BaAlawi, Hamida AL Barwani, Zeyana AL-Dahmani, Intisar Al-Shukri, Aisha Al-Busaidi, Aisha Al-Amri, Ahlam Al-Amri, Mohammed Al-Tobi, Samiha Al Kharusi, Abdulla Balkhair                                                                                                                                                      |
| EPI_ISL_458139                                                                                                                                                                                                                                                                                                                                 | Evandro Chagas Institute                                                                                                       | Evandro Chagas Institute                                                                                                       | Mohammad Uzzal Hossain, Md. Moniruzzaman, Md. Salim Khan, Md. Nazrul Islam, Md. Hadisur Rahman, Artrita Bhattacharjee, Md. Ruhul Amin, Asif Rashid, Chaman Ara Keya, Keshob Chandra Das, Md. Salimullah                                                                                                                                                                                                                  |
| EPI_ISL_459866                                                                                                                                                                                                                                                                                                                                 | Kingston Health Sciences Center                                                                                                | Queen's Genomics Lab at Ongwanada (Q-GLO)                                                                                      | Santos, M.C.; Silva, A.M.; Junior, W.D.C.; Barbagelata, L.S.; Ferreira, J.A.; Sousa, E.M.A.; da Silva, P.S.; Resque, H.R; Martins, L.C.; Sousa Junior, E.C.;Viana, G.M.R                                                                                                                                                                                                                                                 |
| EPI_ISL_459867                                                                                                                                                                                                                                                                                                                                 | Kingston Health Sciences Center                                                                                                | Queen's Genomics Lab at Ongwanada (Q-GLO)                                                                                      | Sjaarda CP, Rustom N, Huang D, Perez-Patrigeon S, Hudson ML, Wong H,Guan H, Ayub M, Soares CN, Colautti R, Evans GA, Sheth P                                                                                                                                                                                                                                                                                             |
| EPI_ISL_459868, EPI_ISL_459869, EPI_ISL_459871, EPI_ISL_459872, EPI_ISL_459873, EPI_ISL_459874, EPI_ISL_459875, EPI_ISL_459877, EPI_ISL_459879, EPI_ISL_459880, EPI_ISL_459881, EPI_ISL_459882, EPI_ISL_459883, EPI_ISL_459885, EPI_ISL_459886, EPI_ISL_459887, EPI_ISL_459888, EPI_ISL_459889, EPI_ISL_459890, EPI_ISL_459891, EPI_ISL_459892 | Kingston Health Sciences Center                                                                                                | Queen's Genomics Lab at Ongwanada (Q-GLO)                                                                                      | Sjaarda CP, Rustom N, Huang D, Perez-Patrigeon S, Hudson ML, Wong H,Guan H, Ayub M, Soares CN, Colautti R, Evans GA, Sheth P                                                                                                                                                                                                                                                                                             |
| EPI_ISL_459911                                                                                                                                                                                                                                                                                                                                 | Devki Devi Foundation, a unit of Max Healthcare                                                                                | CSIR-IGIB/Max                                                                                                                  | Rajesh Pandey#, Samreen Siddiqui, Pooja Sharma, Bansidhar Tarai, Vivekanand A, Bharathram Uppili, Saruchi Wadhwa, Nishu Tyagi, Mitali Mukerji, Poonam Das, Sujeet Jha, Mohammed Faruq, Vinita Jha, Anurag Agrawal                                                                                                                                                                                                        |
| EPI_ISL_459914, EPI_ISL_459915, EPI_ISL_459918, EPI_ISL_459919, EPI_ISL_459920, EPI_ISL_459921, EPI_ISL_459922, EPI_ISL_459923, EPI_ISL_459932, EPI_ISL_459933, EPI_ISL_459934, EPI_ISL_459935, EPI_ISL_459936, EPI_ISL_459937, EPI_ISL_459938, EPI_ISL_459939, EPI_ISL_459940, EPI_ISL_459941, EPI_ISL_459942, EPI_ISL_459943                 | Devki Devi Foundation, a unit of Max Healthcare                                                                                | CSIR-IGIB/Max                                                                                                                  | Rajesh Pandey#, Samreen Siddiqui, Pooja Sharma, Bansidhar Tarai, Vivekanand A, Bharathram Uppili, Saruchi Wadhwa, Nishu Tyagi, Mitali Mukerji, Bansidhar Tarai, Poonam Das, Sujeet Jha, Mohammed Faruq, Vinita Jha, Anurag Agrawal                                                                                                                                                                                       |
| EPI_ISL_459955                                                                                                                                                                                                                                                                                                                                 | Institute for Medical Research, Infectious Disease Research Centre, National Institutes of Health, Ministry of Health Malaysia | Institute for Medical Research, Infectious Disease Research Centre, National Institutes of Health, Ministry of Health Malaysia | Suppiah J, Mohd-Zawawi Z, Kamel KA, Eilan K, Kalyanasundram J, Mohd-Zain R, Thayan R                                                                                                                                                                                                                                                                                                                                     |
| EPI_ISL_459962, EPI_ISL_459963                                                                                                                                                                                                                                                                                                                 | Centogene AG                                                                                                                   | Centogene AG                                                                                                                   | Prof. Dr. Peter Bauer, Dr. Krishna Kumar Kandaswamy                                                                                                                                                                                                                                                                                                                                                                      |
| EPI_ISL_459964                                                                                                                                                                                                                                                                                                                                 | Centogene AG                                                                                                                   | Centogene AG                                                                                                                   | Prof. Dr. Peter Bauer, Dr. Krishna Kumar Kandaswamy                                                                                                                                                                                                                                                                                                                                                                      |
| EPI_ISL_460079                                                                                                                                                                                                                                                                                                                                 | Molecular Virology Unit, Fondazione IRCCS Policlinico San Matteo , Pavia                                                       | Laboratory of Virology, INMI Lazzaro Spallanzani IRCCS                                                                         | Barbara Bartolini, Cesare E.M. Gruber, Maria R. Capobianchi, Martina Rueca, Antonio Piralla, Fausto Baldanti, Antonino Di Caro                                                                                                                                                                                                                                                                                           |
| EPI_ISL_460080                                                                                                                                                                                                                                                                                                                                 | Molecular Virology Unit, Fondazione IRCCS Policlinico San Matteo , Pavia                                                       | Laboratory of Virology, INMI Lazzaro Spallanzani IRCCS                                                                         | Antonio Piralla, Barbara Bartolini, Fausto Baldanti, Martina Rueca, Antonino Di Caro, Cesare E.M. Gruber, Maria R. Capobianchi                                                                                                                                                                                                                                                                                           |
| EPI_ISL_460081                                                                                                                                                                                                                                                                                                                                 | Molecular Virology Unit, Fondazione IRCCS Policlinico San Matteo , Pavia                                                       | Laboratory of Virology, INMI Lazzaro Spallanzani IRCCS                                                                         | Fausto Baldanti, Martina Rueca, Antonio Piralla, Antonino Di Caro, Maria R. Capobianchi, Cesare E.M. Gruber, Barbara Bartolini                                                                                                                                                                                                                                                                                           |
| EPI_ISL_460082                                                                                                                                                                                                                                                                                                                                 | Molecular Virology Unit, Fondazione IRCCS Policlinico San Matteo , Pavia                                                       | Laboratory of Virology, INMI Lazzaro Spallanzani IRCCS                                                                         | Martina Rueca, Cesare E.M. Gruber, Antonio Piralla, Antonino Di Caro, Barbara Bartolini, Maria R. Capobianchi, Fausto Baldanti                                                                                                                                                                                                                                                                                           |
| EPI_ISL_460083                                                                                                                                                                                                                                                                                                                                 | Molecular Virology Unit, Fondazione IRCCS Policlinico San Matteo , Pavia                                                       | Laboratory of Virology, INMI Lazzaro Spallanzani IRCCS                                                                         | Martina Rueca, Antonino Di Caro, Cesare E.M. Gruber, Barbara Bartolini, Fausto Baldanti, Antonio Piralla, Maria R. Capobianchi                                                                                                                                                                                                                                                                                           |
| EPI_ISL_460084                                                                                                                                                                                                                                                                                                                                 | Molecular Virology Unit, Fondazione IRCCS Policlinico San Matteo , Pavia                                                       | Laboratory of Virology, INMI Lazzaro Spallanzani IRCCS                                                                         | Fausto Baldanti, Antonio Piralla, Martina Rueca, Barbara Bartolini, Maria R. Capobianchi, Cesare E.M. Gruber, Antonino Di Caro                                                                                                                                                                                                                                                                                           |
| EPI_ISL_460085                                                                                                                                                                                                                                                                                                                                 | Molecular Virology Unit, Fondazione IRCCS Policlinico San Matteo , Pavia                                                       | Laboratory of Virology, INMI Lazzaro Spallanzani IRCCS                                                                         | Cesare E.M. Gruber, Maria R. Capobianchi, Barbara Bartolini, Fausto Baldanti, Martina Rueca, Antonio Piralla, Antonino Di Caro                                                                                                                                                                                                                                                                                           |
| EPI_ISL_460086                                                                                                                                                                                                                                                                                                                                 | Molecular Virology Unit, Fondazione IRCCS Policlinico San Matteo , Pavia                                                       | Laboratory of Virology, INMI Lazzaro Spallanzani IRCCS                                                                         | Maria R. Capobianchi, Fausto Baldanti, Antonio Piralla, Antonino Di Caro, Barbara Bartolini, Cesare E.M. Gruber, Martina Rueca                                                                                                                                                                                                                                                                                           |
| EPI_ISL_460087                                                                                                                                                                                                                                                                                                                                 | Molecular Virology Unit, Fondazione IRCCS Policlinico San Matteo , Pavia                                                       | Laboratory of Virology, INMI Lazzaro Spallanzani IRCCS                                                                         | Cesare E.M. Gruber, Maria R. Capobianchi, Martina Rueca, Barbara Bartolini, Antonino Di Caro, Antonio Piralla, Fausto Baldanti                                                                                                                                                                                                                                                                                           |
| EPI_ISL_460088                                                                                                                                                                                                                                                                                                                                 | Molecular Virology Unit, Fondazione IRCCS Policlinico San Matteo , Pavia                                                       | Laboratory of Virology, INMI Lazzaro Spallanzani IRCCS                                                                         | Martina Rueca, Barbara Bartolini, Fausto Baldanti, Maria R. Capobianchi, Cesare E.M. Gruber, Antonino Di Caro, Antonio Piralla                                                                                                                                                                                                                                                                                           |
| EPI_ISL_460089                                                                                                                                                                                                                                                                                                                                 | Molecular Virology Unit, Fondazione IRCCS Policlinico San Matteo , Pavia                                                       | Laboratory of Virology, INMI Lazzaro Spallanzani IRCCS                                                                         | Antonino Di Caro, Barbara Bartolini, Martina Rueca, Cesare E.M. Gruber, Antonio Piralla, Fausto Baldanti, Maria R. Capobianchi                                                                                                                                                                                                                                                                                           |
| EPI_ISL_460091                                                                                                                                                                                                                                                                                                                                 | Molecular Virology Unit, Fondazione IRCCS Policlinico San Matteo , Pavia                                                       | Laboratory of Virology, INMI Lazzaro Spallanzani IRCCS                                                                         | Antonino Di Caro, Antonio Piralla, Martina Rueca, Fausto Baldanti, Barbara Bartolini, Maria R. Capobianchi, Cesare E.M. Gruber                                                                                                                                                                                                                                                                                           |
| EPI_ISL_460092                                                                                                                                                                                                                                                                                                                                 | Molecular Virology Unit, Fondazione IRCCS Policlinico San Matteo , Pavia                                                       | Laboratory of Virology, INMI Lazzaro Spallanzani IRCCS                                                                         | Cesare E.M. Gruber, Martina Rueca, Maria R. Capobianchi, Antonino Di Caro, Antonio Piralla, Barbara Bartolini, Fausto Baldanti                                                                                                                                                                                                                                                                                           |
| EPI_ISL_460093                                                                                                                                                                                                                                                                                                                                 | Molecular Virology Unit, Fondazione IRCCS Policlinico San Matteo , Pavia                                                       | Laboratory of Virology, INMI Lazzaro Spallanzani IRCCS                                                                         | Maria R. Capobianchi, Antonio Piralla, Antonino Di Caro, Fausto Baldanti, Martina Rueca, Cesare E.M. Gruber, Barbara Bartolini                                                                                                                                                                                                                                                                                           |
| EPI_ISL_460094                                                                                                                                                                                                                                                                                                                                 | Molecular Virology Unit, Fondazione IRCCS Policlinico San Matteo , Pavia                                                       | Laboratory of Virology, INMI Lazzaro Spallanzani IRCCS                                                                         | Barbara Bartolini, Maria R. Capobianchi, Antonino Di Caro, Antonio Piralla, Cesare E.M. Gruber, Martina Rueca, Fausto Baldanti                                                                                                                                                                                                                                                                                           |
| EPI_ISL_461478                                                                                                                                                                                                                                                                                                                                 | Government Medical College, Vadodara                                                                                           | Gujarat Biotechnology Research Centre                                                                                          | Fenil Patel, Nidhi Patel, Nitin Savaliya, Raghawendra Kumar, Dinesh Kumar, Zuber Saiyed, Komal Patel, Labdhi Pandya, Snehal Bagatharia, Tanuja Javadekar , R N Daveswkar, Tejas Shah, Ankit Hinsu, Pritesh Sabara, Apurvasinh Puvar, Janvi Raval, Zarna Patel, Monika Gandhi, Pinal Trivedi, Maharshi Pandya, R D Dixit, A M Kadri, Harsh Bakshi, Chaitanya Joshi, Madhvi Joshi,                                         |
| EPI_ISL_461479                                                                                                                                                                                                                                                                                                                                 | Government Medical College, Vadodara                                                                                           | Gujarat Biotechnology Research Centre                                                                                          | Neelam Nathani, Nitin Savaliya, Raghawendra Kumar, Dinesh Kumar, Zuber Saiyed, Komal Patel, Labdhi Pandya, Snehal Bagatharia, Tanuja Javadekar , R N Daveswkar, Tejas Shah, Ankit Hinsu, Pritesh Sabara, Apurvasinh Puvar, Janvi Raval, Zarna Patel, Monika Gandhi, Pinal Trivedi, Maharshi Pandya, Nidhi Patel, R D Dixit, A M Kadri, Harsh Bakshi, Chaitanya Joshi, Madhvi Joshi,                                      |
| EPI_ISL_461480                                                                                                                                                                                                                                                                                                                                 | Government Medical College, Vadodara                                                                                           | Gujarat Biotechnology Research Centre                                                                                          | Armi Chaudhari, Raghawendra Kumar, Dinesh Kumar, Zuber Saiyed, Komal Patel, Labdhi Pandya, Snehal Bagatharia, Tanuja Javadekar , R N Daveswkar, Tejas Shah, Ankit Hinsu, Pritesh Sabara, Apurvasinh Puvar, Janvi Raval, Zarna Patel, Monika Gandhi, Pinal Trivedi, Maharshi Pandya, Nidhi Patel, Nitin Savaliya, R D Dixit, A M Kadri, Harsh Bakshi, Chaitanya Joshi, Madhvi Joshi,                                      |
| EPI_ISL_461481                                                                                                                                                                                                                                                                                                                                 | Pandit Deendayal Upadhyay Government Medical College, Rajkot                                                                   | Gujarat Biotechnology Research Centre                                                                                          | Bhavya Jindal, Dinesh Kumar, Zuber Saiyed, Komal Patel, Labdhi Pandya, Snehal Bagatharia, Prakash Modi, Sejul Antala, Manish Pattani, Tejas Shah, Ankit Hinsu, Pritesh Sabara, Apurvasinh Puvar, Janvi Raval, Zarna Patel, Monika Gandhi, Pinal Trivedi, Maharshi Pandya, Nidhi Patel, Nitin Savaliya, Raghawendra Kumar, R D Dixit, A M Kadri, Harsh Bakshi, Chaitanya Joshi, Madhvi Joshi                              |
| EPI_ISL_461482                                                                                                                                                                                                                                                                                                                                 | Pandit Deendayal Upadhyay Government Medical College, Rajkot                                                                   | Gujarat Biotechnology Research Centre                                                                                          | Anjali Rajwar, Zuber Saiyed, Komal Patel, Labdhi Pandya, Snehal Bagatharia, Prakash Modi, Sejul Antala, Manish Pattani, Tejas Shah, Ankit Hinsu, Pritesh Sabara, Apurvasinh Puvar, Janvi Raval, Zarna Patel, Monika Gandhi, Pinal Trivedi, Maharshi Pandya, Nidhi Patel, Nitin Savaliya, Raghawendra Kumar, Dinesh Kumar, R D Dixit, A M Kadri, Harsh Bakshi, Chaitanya Joshi, Madhvi Joshi                              |
| EPI_ISL_461483                                                                                                                                                                                                                                                                                                                                 | B.J. Medical College and Civil hospital                                                                                        | Gujarat Biotechnology Research Centre                                                                                          | Dipeshwari Shewale, Komal Patel, Labdhi Pandya, Snehal Bagatharia, Pranay Shah, Kamlesh J Upadhyay, Tejas Shah, Ankit Hinsu, Pritesh Sabara, Apurvasinh Puvar, Janvi Raval, Zarna Patel, Monika Gandhi, Pinal Trivedi, Maharshi Pandya, Nidhi Patel, Nitin Savaliya, Raghawendra Kumar, Zuber Saiyed, Komal Patel, R D Dixit, A M Kadri, Harsh Bakshi, Chaitanya Joshi, Madhvi Joshi,                                    |
| EPI_ISL_461484                                                                                                                                                                                                                                                                                                                                 | B.J. Medical College and Civil hospital                                                                                        | Gujarat Biotechnology Research Centre                                                                                          | Priyanka P Vatsa, Labdhi Pandya, Snehal Bagatharia, Pranay Shah, Kamlesh J Upadhyay, Tejas Shah, Ankit Hinsu, Pritesh Sabara, Apurvasinh Puvar, Janvi Raval, Zarna Patel, Monika Gandhi, Pinal Trivedi, Maharshi Pandya, Nidhi Patel, Nitin Savaliya, Raghawendra Kumar, Dinesh Kumar, Zuber Saiyed, Komal Patel, R D Dixit, A M Kadri, Harsh Bakshi, Chaitanya Joshi, Madhvi Joshi,                                     |
| EPI_ISL_461485                                                                                                                                                                                                                                                                                                                                 | B.J. Medical College and Civil hospital                                                                                        | Gujarat Biotechnology Research Centre                                                                                          | Pooja P Doshi, Snehal Bagatharia, Pranay Shah, Kamlesh J Upadhyay, Tejas Shah, Ankit Hinsu, Pritesh Sabara, Apurvasinh Puvar, Janvi Raval, Zarna Patel, Monika Gandhi, Pinal Trivedi, Maharshi Pandya, Nidhi Patel, Nitin Savaliya, Raghawendra Kumar, Dinesh Kumar, Zuber Saiyed, Komal Patel, R D Dixit, A M Kadri, Harsh Bakshi, Chaitanya Joshi, Madhvi Joshi,                                                       |
| EPI_ISL_461486                                                                                                                                                                                                                                                                                                                                 | B.J. Medical College and Civil hospital                                                                                        | Gujarat Biotechnology Research Centre                                                                                          | Akanksha Verma, Pranay Shah, Kamlesh J Upadhyay, Tejas Shah, Ankit Hinsu, Pritesh Sabara, Apurvasinh Puvar, Janvi Raval, Zarna Patel, Monika Gandhi, Pinal Trivedi, Maharshi Pandya, Nidhi Patel, Nitin Savaliya, Raghawendra Kumar, Dinesh Kumar, Zuber Saiyed, Komal Patel, Labdhi Pandya, Snehal Bagatharia, R D Dixit, A M Kadri, Harsh Bakshi, Chaitanya Joshi, Madhvi Joshi,                                       |
| EPI_ISL_461487                                                                                                                                                                                                                                                                                                                                 | B.J. Medical College and Civil hospital                                                                                        | Gujarat Biotechnology Research Centre                                                                                          | Priti Pandita, Kamlesh J Upadhyay, Tejas Shah, Ankit Hinsu, Pritesh Sabara, Apurvasinh Puvar, Janvi Raval, Zarna Patel, Monika Gandhi, Pinal Trivedi, Maharshi Pandya, Nidhi Patel, Nitin Savaliya, Raghawendra Kumar, Dinesh Kumar, Zuber Saiyed, Komal Patel, Labdhi Pandya, Snehal Bagatharia, Pranay Shah, R D Dixit, A M Kadri, Harsh Bakshi, Chaitanya Joshi, Madhvi Joshi,                                        |
| EPI_ISL_461488                                                                                                                                                                                                                                                                                                                                 | B.J. Medical College and Civil hospital                                                                                        | Gujarat Biotechnology Research Centre                                                                                          | Pragya Sharma, Tejas Shah, Ankit Hinsu, Pritesh Sabara, Apurvasinh Puvar, Janvi Raval, Zarna Patel, Monika Gandhi, Pinal Trivedi, Maharshi Pandya, Nidhi Patel, Nitin Savaliya, Raghawendra Kumar, Dinesh Kumar, Zuber Saiyed, Komal Patel, Labdhi Pandya, Snehal Bagatharia, Pranay Shah, Kamlesh J Upadhyay, R D Dixit, A M Kadri, Harsh Bakshi, Chaitanya Joshi, Madhvi Joshi,                                        |
| EPI_ISL_461489                                                                                                                                                                                                                                                                                                                                 | B.J. Medical College and Civil hospital                                                                                        | Gujarat Biotechnology Research Centre                                                                                          | Neha Rajpara, Ankit Hinsu, Pritesh Sabara, Apurvasinh Puvar, Janvi Raval, Zarna Patel, Monika Gandhi, Pinal Trivedi, Maharshi Pandya, Nidhi Patel, Nitin Savaliya, Raghawendra Kumar,                                                                                                                                                                                                                                    |



|                                                                                                                                                                                                                                                                                                                                                                                                |                                                                                     |                                                                                                   |  |                                                                                                                                                                                                                                                                                                                                                                                                                                 |
|------------------------------------------------------------------------------------------------------------------------------------------------------------------------------------------------------------------------------------------------------------------------------------------------------------------------------------------------------------------------------------------------|-------------------------------------------------------------------------------------|---------------------------------------------------------------------------------------------------|--|---------------------------------------------------------------------------------------------------------------------------------------------------------------------------------------------------------------------------------------------------------------------------------------------------------------------------------------------------------------------------------------------------------------------------------|
|                                                                                                                                                                                                                                                                                                                                                                                                |                                                                                     |                                                                                                   |  | Dinesh Kumar, Zuber Saiyed, Komal Patel, Labdhi Pandya, Snehal Bagatharia, Pranay Shah, Kamlesh J Upadhyay, Tejas Shah, R D Dixit, A M Kadri, Harsh Bakshi, Chaitanya Joshi, Madhvi Joshi,                                                                                                                                                                                                                                      |
| EPI_ISL_461490                                                                                                                                                                                                                                                                                                                                                                                 | B.J. Medical College and Civil hospital                                             | Gujarat Biotechnology Research Centre                                                             |  | Afzal Ansari, Pritesh Sabara, Apurvasinh Puvar, Janvi Raval, Zarna Patel, Monika Gandhi, Pinal Trivedi, Maharshi Pandya, Nidhi Patel, Nitin Savaliya, Raghawendra Kumar, Dinesh Kumar, Zuber Saiyed, Komal Patel, Labdhi Pandya, Snehal Bagatharia, Pranay Shah, Kamlesh J Upadhyay, Tejas Shah, Ankit Hinsu, R D Dixit, A M Kadri, Harsh Bakshi, Chaitanya Joshi, Madhvi Joshi,                                                |
| EPI_ISL_461491                                                                                                                                                                                                                                                                                                                                                                                 | B.J. Medical College and Civil hospital                                             | Gujarat Biotechnology Research Centre                                                             |  | Feenil Patel, Apurvasinh Puvar, Janvi Raval, Zarna Patel, Monika Gandhi, Pinal Trivedi, Maharshi Pandya, Nidhi Patel, Nitin Savaliya, Raghawendra Kumar, Dinesh Kumar, Zuber Saiyed, Komal Patel, Labdhi Pandya, Snehal Bagatharia, Pranay Shah, Kamlesh J Upadhyay, Tejas Shah, Ankit Hinsu, Pritesh Sabara, R D Dixit, A M Kadri, Harsh Bakshi, Chaitanya Joshi, Madhvi Joshi,                                                |
| EPI_ISL_461492                                                                                                                                                                                                                                                                                                                                                                                 | B.J. Medical College and Civil hospital                                             | Gujarat Biotechnology Research Centre                                                             |  | Neelam Nathani, Janvi Raval, Zarna Patel, Monika Gandhi, Pinal Trivedi, Maharshi Pandya, Nidhi Patel, Nitin Savaliya, Raghawendra Kumar, Dinesh Kumar, Zuber Saiyed, Komal Patel, Labdhi Pandya, Snehal Bagatharia, Pranay Shah, Kamlesh J Upadhyay, Tejas Shah, Ankit Hinsu, Pritesh Sabara, Apurvasinh Puvar, R D Dixit, A M Kadri, Harsh Bakshi, Chaitanya Joshi, Madhvi Joshi,                                              |
| EPI_ISL_461493                                                                                                                                                                                                                                                                                                                                                                                 | B.J. Medical College and Civil hospital                                             | Gujarat Biotechnology Research Centre                                                             |  | Armi Chaudhari, Zarna Patel, Monika Gandhi, Pinal Trivedi, Maharshi Pandya, Nidhi Patel, Nitin Savaliya, Raghawendra Kumar, Dinesh Kumar, Zuber Saiyed, Komal Patel, Labdhi Pandya, Snehal Bagatharia, Pranay Shah, Kamlesh J Upadhyay, Tejas Shah, Ankit Hinsu, Pritesh Sabara, Apurvasinh Puvar, Janvi Raval, R D Dixit, A M Kadri, Harsh Bakshi, Chaitanya Joshi, Madhvi Joshi,                                              |
| EPI_ISL_461494                                                                                                                                                                                                                                                                                                                                                                                 | B.J. Medical College and Civil hospital                                             | Gujarat Biotechnology Research Centre                                                             |  | Bhavya Jindal, Monika Gandhi, Pinal Trivedi, Maharshi Pandya, Nidhi Patel, Nitin Savaliya, Raghawendra Kumar, Dinesh Kumar, Zuber Saiyed, Komal Patel, Labdhi Pandya, Snehal Bagatharia, Pranay Shah, Kamlesh J Upadhyay, Tejas Shah, Ankit Hinsu, Pritesh Sabara, Apurvasinh Puvar, Janvi Raval, R D Dixit, A M Kadri, Harsh Bakshi, Chaitanya Joshi, Madhvi Joshi,                                                            |
| EPI_ISL_461495                                                                                                                                                                                                                                                                                                                                                                                 | B.J. Medical College and Civil hospital                                             | Gujarat Biotechnology Research Centre                                                             |  | Anjali Rajwar, Pinal Trivedi, Maharshi Pandya, Nidhi Patel, Nitin Savaliya, Raghawendra Kumar, Dinesh Kumar, Zuber Saiyed, Komal Patel, Labdhi Pandya, Snehal Bagatharia, Pranay Shah, Kamlesh J Upadhyay, Tejas Shah, Ankit Hinsu, Pritesh Sabara, Apurvasinh Puvar, Janvi Raval, Zarna Patel, Monika Gandhi, R D Dixit, A M Kadri, Harsh Bakshi, Chaitanya Joshi, Madhvi Joshi,                                               |
| EPI_ISL_461496                                                                                                                                                                                                                                                                                                                                                                                 | B.J. Medical College and Civil hospital                                             | Gujarat Biotechnology Research Centre                                                             |  | Dipeshwari Shewale, Maharshi Pandya, Nidhi Patel, Nitin Savaliya, Raghawendra Kumar, Dinesh Kumar, Zuber Saiyed, Komal Patel, Labdhi Pandya, Snehal Bagatharia, Pranay Shah, Kamlesh J Upadhyay, Tejas Shah, Ankit Hinsu, Pritesh Sabara, Apurvasinh Puvar, Janvi Raval, Zarna Patel, Monika Gandhi, Pinal Trivedi, R D Dixit, A M Kadri, Harsh Bakshi, Chaitanya Joshi, Madhvi Joshi,                                          |
| EPI_ISL_461497                                                                                                                                                                                                                                                                                                                                                                                 | B.J. Medical College and Civil hospital                                             | Gujarat Biotechnology Research Centre                                                             |  | Priyanka P Vatsa, Nidhi Patel, Nitin Savaliya, Raghawendra Kumar, Dinesh Kumar, Zuber Saiyed, Komal Patel, Labdhi Pandya, Snehal Bagatharia, Pranay Shah, Kamlesh J Upadhyay, Tejas Shah, Ankit Hinsu, Pritesh Sabara, Apurvasinh Puvar, Janvi Raval, Zarna Patel, Monika Gandhi, Pinal Trivedi, Maharshi Pandya, R D Dixit, A M Kadri, Harsh Bakshi, Chaitanya Joshi, Madhvi Joshi,                                            |
| EPI_ISL_461498                                                                                                                                                                                                                                                                                                                                                                                 | B.J. Medical College and Civil hospital                                             | Gujarat Biotechnology Research Centre                                                             |  | Pooja P Doshi, Nitin Savaliya, Raghawendra Kumar, Dinesh Kumar, Zuber Saiyed, Komal Patel, Labdhi Pandya, Snehal Bagatharia, Pranay Shah, Kamlesh J Upadhyay, Tejas Shah, Ankit Hinsu, Pritesh Sabara, Apurvasinh Puvar, Janvi Raval, Zarna Patel, Monika Gandhi, Pinal Trivedi, Maharshi Pandya, Nidhi Patel, R D Dixit, A M Kadri, Harsh Bakshi, Chaitanya Joshi, Madhvi Joshi,                                               |
| EPI_ISL_461499                                                                                                                                                                                                                                                                                                                                                                                 | B.J. Medical College and Civil hospital                                             | Gujarat Biotechnology Research Centre                                                             |  | Akanksha Verma, Raghawendra Kumar, Dinesh Kumar, Zuber Saiyed, Komal Patel, Labdhi Pandya, Snehal Bagatharia, Pranay Shah, Kamlesh J Upadhyay, Tejas Shah, Ankit Hinsu, Pritesh Sabara, Apurvasinh Puvar, Janvi Raval, Zarna Patel, Monika Gandhi, Pinal Trivedi, Maharshi Pandya, Nidhi Patel, Nitin Savaliya, R D Dixit, A M Kadri, Harsh Bakshi, Chaitanya Joshi, Madhvi Joshi,                                              |
| EPI_ISL_461500                                                                                                                                                                                                                                                                                                                                                                                 | B.J. Medical College and Civil hospital                                             | Gujarat Biotechnology Research Centre                                                             |  | Priti Pandita, Dinesh Kumar, Zuber Saiyed, Komal Patel, Labdhi Pandya, Snehal Bagatharia, Pranay Shah, Kamlesh J Upadhyay, Tejas Shah, Ankit Hinsu, Pritesh Sabara, Apurvasinh Puvar, Janvi Raval, Zarna Patel, Monika Gandhi, Pinal Trivedi, Maharshi Pandya, Nidhi Patel, Nitin Savaliya, Raghawendra Kumar, R D Dixit, A M Kadri, Harsh Bakshi, Chaitanya Joshi, Madhvi Joshi,                                               |
| EPI_ISL_461501                                                                                                                                                                                                                                                                                                                                                                                 | B.J. Medical College and Civil hospital                                             | Gujarat Biotechnology Research Centre                                                             |  | Pragya Sharma, Zuber Saiyed, Komal Patel, Labdhi Pandya, Snehal Bagatharia, Pranay Shah, Kamlesh J Upadhyay, Tejas Shah, Ankit Hinsu, Pritesh Sabara, Apurvasinh Puvar, Janvi Raval, Zarna Patel, Monika Gandhi, Pinal Trivedi, Maharshi Pandya, Nidhi Patel, Nitin Savaliya, Raghawendra Kumar, Dinesh Kumar, R D Dixit, A M Kadri, Harsh Bakshi, Chaitanya Joshi, Madhvi Joshi,                                               |
| EPI_ISL_461502                                                                                                                                                                                                                                                                                                                                                                                 | B.J. Medical College and Civil hospital                                             | Gujarat Biotechnology Research Centre                                                             |  | Neha Rajpara, Komal Patel, Labdhi Pandya, Snehal Bagatharia, Pranay Shah, Kamlesh J Upadhyay, Tejas Shah, Ankit Hinsu, Pritesh Sabara, Apurvasinh Puvar, Janvi Raval, Zarna Patel, Monika Gandhi, Pinal Trivedi, Maharshi Pandya, Nidhi Patel, Nitin Savaliya, Raghawendra Kumar, Dinesh Kumar, Zuber Saiyed, R D Dixit, A M Kadri, Harsh Bakshi, Chaitanya Joshi, Madhvi Joshi,                                                |
| EPI_ISL_461503                                                                                                                                                                                                                                                                                                                                                                                 | B.J. Medical College and Civil hospital                                             | Gujarat Biotechnology Research Centre                                                             |  | Afzal Ansari, Labdhi Pandya, Snehal Bagatharia, Pranay Shah, Kamlesh J Upadhyay, Tejas Shah, Ankit Hinsu, Pritesh Sabara, Apurvasinh Puvar, Janvi Raval, Zarna Patel, Monika Gandhi, Pinal Trivedi, Maharshi Pandya, Nidhi Patel, Nitin Savaliya, Raghawendra Kumar, Dinesh Kumar, Zuber Saiyed, Komal Patel, R D Dixit, A M Kadri, Harsh Bakshi, Chaitanya Joshi, Madhvi Joshi,                                                |
| EPI_ISL_461504                                                                                                                                                                                                                                                                                                                                                                                 | B.J. Medical College and Civil hospital                                             | Gujarat Biotechnology Research Centre                                                             |  | Snehal Bagatharia, Pranay Shah, Kamlesh J Upadhyay, Tejas Shah, Ankit Hinsu, Pritesh Sabara, Apurvasinh Puvar, Janvi Raval, Zarna Patel, Monika Gandhi, Pinal Trivedi, Maharshi Pandya, Nidhi Patel, Nitin Savaliya, Raghawendra Kumar, Dinesh Kumar, Zuber Saiyed, Komal Patel, Labdhi Pandya, Feenil Patel, R D Dixit, A M Kadri, Harsh Bakshi, Chaitanya Joshi, Madhvi Joshi,                                                |
| EPI_ISL_461505                                                                                                                                                                                                                                                                                                                                                                                 | B.J. Medical College and Civil hospital                                             | Gujarat Biotechnology Research Centre                                                             |  | Pranay Shah, Kamlesh J Upadhyay, Tejas Shah, Ankit Hinsu, Pritesh Sabara, Apurvasinh Puvar, Janvi Raval, Zarna Patel, Monika Gandhi, Pinal Trivedi, Maharshi Pandya, Nidhi Patel, Nitin Savaliya, Raghawendra Kumar, Dinesh Kumar, Zuber Saiyed, Komal Patel, Labdhi Pandya, Snehal Bagatharia, Neelam Nathani, R D Dixit, A M Kadri, Harsh Bakshi, Chaitanya Joshi, Madhvi Joshi,                                              |
| EPI_ISL_461506                                                                                                                                                                                                                                                                                                                                                                                 | B.J. Medical College and Civil hospital                                             | Gujarat Biotechnology Research Centre                                                             |  | Kamlesh J Upadhyay, Tejas Shah, Ankit Hinsu, Pritesh Sabara, Apurvasinh Puvar, Janvi Raval, Zarna Patel, Monika Gandhi, Pinal Trivedi, Maharshi Pandya, Nidhi Patel, Nitin Savaliya, Raghawendra Kumar, Dinesh Kumar, Zuber Saiyed, Komal Patel, Labdhi Pandya, Snehal Bagatharia, Pranay Shah, Armi Chaudhari, R D Dixit, A M Kadri, Harsh Bakshi, Chaitanya Joshi, Madhvi Joshi,                                              |
| EPI_ISL_462447, EPI_ISL_462448                                                                                                                                                                                                                                                                                                                                                                 | Fundació Lluita contra la SIDA (FLSida)/Hospital Universitari Germans Trias i Pujol | IrsiCaixa AIDS Research Lab                                                                       |  | Marc Noguera-Julian, Mariona Parera, Maria Pilar Armengol, Marc Corbacho, Maria Ubals, Oriol Mitjà, Lidia Ruiz, Nuria Izquierdo, Jorge Carrillo, Roger Paredes, Julia Blanco, Joaquim Segalés, Bonaventura Clotet                                                                                                                                                                                                               |
| EPI_ISL_462449                                                                                                                                                                                                                                                                                                                                                                                 | Fundació Lluita contra la SIDA (FLSida)/Hospital Universitari Germans Trias i Pujol | IrsiCaixa AIDS Research Lab                                                                       |  | Marc Noguera-Julian, Mariona Parera, Maria Pilar Armengol, Marc Corbacho, Maria Ubals, Oriol Mitjà, Lidia Ruiz, Nuria Izquierdo, Jorge Carrillo, Roger Paredes, Julia Blanco, Bonaventura Clotet                                                                                                                                                                                                                                |
| EPI_ISL_462478                                                                                                                                                                                                                                                                                                                                                                                 | Fundación Jiménez Díaz                                                              | Instituto de Salud Carlos III                                                                     |  | Iglesias-Caballero, M. Molinero Calamita, M. González-Esguevillas, M. Camarero, S. Pozo, F. Casas, I. Jiménez, P. Jiménez, M. Zaballós, A. Monzón, S. Varona, S. Juliá, M. Cuesta, I, R. Fernández                                                                                                                                                                                                                              |
| EPI_ISL_462479                                                                                                                                                                                                                                                                                                                                                                                 | Hospital Clinic                                                                     | Instituto de Salud Carlos III                                                                     |  | Iglesias-Caballero, M. Molinero Calamita, M. González-Esguevillas, M. Camarero, S. Pozo, F. Casas, I. Jiménez, P. Jiménez, M. Zaballós, A. Monzón, S. Varona, S. Juliá, M. Cuesta, I, M.A Marcos                                                                                                                                                                                                                                |
| EPI_ISL_463007                                                                                                                                                                                                                                                                                                                                                                                 | Department of Laboratory Medicine, National Taiwan University Hospital              | Microbial Genomics Core Lab, National Taiwan University Centers of Genomic and Precision Medicine |  | Shiou-Hwei Yeh, You-Yu Lin, Ya-Yun Lai, Chiao-Ling Li, Shan-Chwen Chang, Pei-Jer Chen, Shui-Yuan Chang                                                                                                                                                                                                                                                                                                                          |
| EPI_ISL_463008                                                                                                                                                                                                                                                                                                                                                                                 | Institute of Molecular Virology, University Münster                                 | Institute of Molecular Virology, University Münster                                               |  | Angeles Mecate Zambrano, Linda Brunotte, Stephan Ludwig, Joachim Kühn, Alexander Mellmann                                                                                                                                                                                                                                                                                                                                       |
| EPI_ISL_463277, EPI_ISL_463278, EPI_ISL_463279, EPI_ISL_463280, EPI_ISL_463281, EPI_ISL_463282, EPI_ISL_463283, EPI_ISL_463284, EPI_ISL_463285, EPI_ISL_463286, EPI_ISL_463287, EPI_ISL_463288, EPI_ISL_463289, EPI_ISL_463290, EPI_ISL_463291, EPI_ISL_463292, EPI_ISL_463293, EPI_ISL_463294, EPI_ISL_463295, EPI_ISL_463296, EPI_ISL_463297, EPI_ISL_463298, EPI_ISL_463299, EPI_ISL_463300 | see above                                                                           | Ochsner Health                                                                                    |  | Suzanna L. Lamers, David J. Nolan, Rebecca Rose, Sissy Cross, David Moraga Amador, Tong Yang, Luke Caruso, Wayra Navia, Lydia Von Borstel, Xiao Hui Zhou, Amy Feehan, Julia-Garcia-Diaz                                                                                                                                                                                                                                         |
| EPI_ISL_463741, EPI_ISL_463742, EPI_ISL_463743, EPI_ISL_463744, EPI_ISL_463745, EPI_ISL_463746, EPI_ISL_463747, EPI_ISL_463748                                                                                                                                                                                                                                                                 | Department of Molecular Virology, Cyprus Institute of Neurology and Genetics        | Department of Molecular Virology, Cyprus Institute of Neurology and Genetics                      |  | Jan Richter, George Krashias, Christina Tryfonos, Stavros Bashiardes, Dana Koptides, Christina Christodoulou                                                                                                                                                                                                                                                                                                                    |
| EPI_ISL_467029                                                                                                                                                                                                                                                                                                                                                                                 | GMERS Medical College and Hospital, Gandhinagar                                     | Gujarat Biotechnology Research Centre                                                             |  | Seema Bhatt, Gaurishankar Shrimali, Bhavesh Modi, Bharti Rajani, Tejas Shah, Ankit Hinsu, Pritesh Sabara, Apurvasinh Puvar, Janvi Raval, Zarna Patel, Monika Gandhi, Pinal Trivedi, Maharshi Pandya, Nidhi Patel, Nitin Savaliya, Raghawendra Kumar, Dinesh Kumar, Zuber Saiyed, Komal Patel, Labdhi Pandya, Snehal Bagatharia, Bhavya Jindal, R D Dixit, A M Kadri, Harsh Bakshi, Chaitanya Joshi, Madhvi Joshi                |
| EPI_ISL_467030                                                                                                                                                                                                                                                                                                                                                                                 | GMERS Medical College and Hospital, Gandhinagar                                     | Gujarat Biotechnology Research Centre                                                             |  | Gaurishankar Shrimali, Bhavesh Modi, Bharti Rajani, Tejas Shah, Ankit Hinsu, Pritesh Sabara, Apurvasinh Puvar, Janvi Raval, Zarna Patel, Monika Gandhi, Pinal Trivedi, Maharshi Pandya, Nidhi Patel, Nitin Savaliya, Raghawendra Kumar, Dinesh Kumar, Zuber Saiyed, Komal Patel, Labdhi Pandya, Snehal Bagatharia, Seema Bhatt, Priyanka P Vatsa, R D Dixit, A M Kadri, Harsh Bakshi, Chaitanya Joshi, Madhvi Joshi             |
| EPI_ISL_467031                                                                                                                                                                                                                                                                                                                                                                                 | GMERS Medical College and Hospital, Gandhinagar                                     | Gujarat Biotechnology Research Centre                                                             |  | Bhavesh Modi, Bharti Rajani, Tejas Shah, Ankit Hinsu, Pritesh Sabara, Apurvasinh Puvar, Janvi Raval, Zarna Patel, Monika Gandhi, Pinal Trivedi, Maharshi Pandya, Nidhi Patel, Nitin Savaliya, Raghawendra Kumar, Dinesh Kumar, Zuber Saiyed, Komal Patel, Labdhi Pandya, Snehal Bagatharia, Seema Bhatt, Gaurishankar Shrimali, Bhavesh Modi, Akanksha Verma, R D Dixit, A M Kadri, Harsh Bakshi, Chaitanya Joshi, Madhvi Joshi |
| EPI_ISL_467032                                                                                                                                                                                                                                                                                                                                                                                 | GMERS Medical College and Hospital, Gandhinagar                                     | Gujarat Biotechnology Research Centre                                                             |  | Bharti Rajani, Tejas Shah, Ankit Hinsu, Pritesh Sabara, Apurvasinh Puvar, Janvi Raval, Zarna Patel, Monika Gandhi, Pinal Trivedi, Maharshi Pandya, Nidhi Patel, Nitin Savaliya, Raghawendra Kumar, Dinesh Kumar, Zuber Saiyed, Komal Patel, Labdhi Pandya, Snehal Bagatharia, Seema Bhatt, Gaurishankar Shrimali, Bhavesh Modi, Akanksha Verma, R D Dixit, A M Kadri, Harsh Bakshi, Chaitanya Joshi, Madhvi Joshi               |
| EPI_ISL_467033                                                                                                                                                                                                                                                                                                                                                                                 | GMERS Medical College and Hospital, Gandhinagar                                     | Gujarat Biotechnology Research Centre                                                             |  | Tejas Shah, Ankit Hinsu, Pritesh Sabara, Apurvasinh Puvar, Janvi Raval, Zarna Patel, Monika Gandhi, Pinal Trivedi, Maharshi Pandya, Nidhi Patel, Nitin Savaliya, Raghawendra Kumar, Dinesh Kumar, Zuber Saiyed, Komal Patel, Labdhi Pandya, Snehal Bagatharia, Seema Bhatt, Gaurishankar Shrimali, Bhavesh Modi, Bharti Rajani, Priti Pandita, R D Dixit, A M Kadri, Harsh Bakshi, Chaitanya Joshi, Madhvi Joshi                |
| EPI_ISL_467034                                                                                                                                                                                                                                                                                                                                                                                 | GMERS Medical College and Hospital, Gandhinagar                                     | Gujarat Biotechnology Research Centre                                                             |  | Ankit Hinsu, Pritesh Sabara, Apurvasinh Puvar, Janvi Raval, Zarna Patel, Monika Gandhi, Pinal Trivedi, Maharshi Pandya, Nidhi Patel, Nitin Savaliya, Raghawendra Kumar, Dinesh Kumar, Zuber Saiyed, Komal Patel, Labdhi Pandya, Snehal Bagatharia, Seema Bhatt, Gaurishankar Shrimali, Bhavesh Modi, Bharti Rajani, Tejas Shah, Pragya Sharma, R D Dixit, A M Kadri, Harsh Bakshi, Chaitanya Joshi, Madhvi Joshi                |
| EPI_ISL_467035                                                                                                                                                                                                                                                                                                                                                                                 | GMERS Medical College and Hospital, Gandhinagar                                     | Gujarat Biotechnology Research Centre                                                             |  | Pritesh Sabara, Apurvasinh Puvar, Janvi Raval, Zarna Patel, Monika Gandhi, Pinal Trivedi, Maharshi Pandya, Nidhi Patel, Nitin Savaliya, Raghawendra Kumar, Dinesh Kumar, Zuber Saiyed, Komal Patel, Labdhi Pandya, Snehal Bagatharia, Seema Bhatt, Gaurishankar Shrimali, Bhavesh Modi, Bharti Rajani, Tejas Shah, Ankit Hinsu, Neha Rajpara, R D Dixit, A M Kadri, Harsh Bakshi, Chaitanya Joshi, Madhvi Joshi                 |
| EPI_ISL_467036                                                                                                                                                                                                                                                                                                                                                                                 | GMERS Medical College and Hospital, Gandhinagar                                     | Gujarat Biotechnology Research Centre                                                             |  | Apurvasinh Puvar, Janvi Raval, Zarna Patel, Monika Gandhi, Pinal Trivedi, Maharshi Pandya, Nidhi Patel, Nitin Savaliya, Raghawendra Kumar, Dinesh Kumar, Zuber Saiyed, Komal Patel, Labdhi Pandya, Snehal Bagatharia, Seema Bhatt, Gaurishankar Shrimali, Bhavesh Modi, Bharti Rajani, Tejas Shah, Ankit Hinsu, Pritesh Sabara, Afzal Ansari, R D Dixit, A M Kadri, Harsh Bakshi, Chaitanya Joshi, Madhvi Joshi                 |

|                                                                                                                                                                                                                                                                                                                                                                                                                                                                                                                                                                                                                                                                                                                |                                                                                                                                                                                                                                                                      |                                                                                                                               |                                                                                                                                                                                                                                                                                                                                                                                                                                                 |
|----------------------------------------------------------------------------------------------------------------------------------------------------------------------------------------------------------------------------------------------------------------------------------------------------------------------------------------------------------------------------------------------------------------------------------------------------------------------------------------------------------------------------------------------------------------------------------------------------------------------------------------------------------------------------------------------------------------|----------------------------------------------------------------------------------------------------------------------------------------------------------------------------------------------------------------------------------------------------------------------|-------------------------------------------------------------------------------------------------------------------------------|-------------------------------------------------------------------------------------------------------------------------------------------------------------------------------------------------------------------------------------------------------------------------------------------------------------------------------------------------------------------------------------------------------------------------------------------------|
| EPI_ISL_467037                                                                                                                                                                                                                                                                                                                                                                                                                                                                                                                                                                                                                                                                                                 | GMERS Medical College and Hospital, Gandhinagar                                                                                                                                                                                                                      | Gujarat Biotechnology Research Centre                                                                                         | Janvi Raval, Zarna Patel, Monika Gandhi, Pinal Trivedi, Maharshi Pandya, Nidhi Patel, Nitin Savaliya, Raghawendra Kumar, Dinesh Kumar, Zuber Saiyed, Komal Patel, Labdhi Pandya, Snehal Bagatharia, Seema Bhatt, Gaurishankar Shrimali, Bhavesh Modi, Bharti Rajani, Tejas Shah, Ankit Hinsu, Pritesh Sabara, Apurvasinh Puvar, Fenil Patel, R D Dixit, A M Kadri, Harsh Bakshi, Chaitanya Joshi, Madhvi Joshi                                  |
| EPI_ISL_467038                                                                                                                                                                                                                                                                                                                                                                                                                                                                                                                                                                                                                                                                                                 | GMERS Medical College and Hospital, Gandhinagar                                                                                                                                                                                                                      | Gujarat Biotechnology Research Centre                                                                                         | Zarna Patel, Monika Gandhi, Pinal Trivedi, Maharshi Pandya, Nidhi Patel, Nitin Savaliya, Raghawendra Kumar, Dinesh Kumar, Zuber Saiyed, Komal Patel, Labdhi Pandya, Snehal Bagatharia, Seema Bhatt, Gaurishankar Shrimali, Bhavesh Modi, Bharti Rajani, Tejas Shah, Ankit Hinsu, Pritesh Sabara, Apurvasinh Puvar, Janvi Raval, Neelam Nathani, R D Dixit, A M Kadri, Harsh Bakshi, Chaitanya Joshi, Madhvi Joshi                               |
| EPI_ISL_467039                                                                                                                                                                                                                                                                                                                                                                                                                                                                                                                                                                                                                                                                                                 | Government Medical College, Vadodara                                                                                                                                                                                                                                 | Gujarat Biotechnology Research Centre                                                                                         | Meenakshi Shah, Neena Doshi, Varsha Godbole, Tejas Shah, Ankit Hinsu, Pritesh Sabara, Apurvasinh Puvar, Janvi Raval, Zarna Patel, Monika Gandhi, Pinal Trivedi, Maharshi Pandya, Nidhi Patel, Nitin Savaliya, Raghawendra Kumar, Dinesh Kumar, Zuber Saiyed, Komal Patel, Labdhi Pandya, Snehal Bagatharia, Armi Chaudhari, R D Dixit, A M Kadri, Harsh Bakshi, Chaitanya Joshi, Madhvi Joshi                                                   |
| EPI_ISL_467040                                                                                                                                                                                                                                                                                                                                                                                                                                                                                                                                                                                                                                                                                                 | Government Medical College, Vadodara                                                                                                                                                                                                                                 | Gujarat Biotechnology Research Centre                                                                                         | Neena Doshi, Varsha Godbole, Tejas Shah, Ankit Hinsu, Pritesh Sabara, Apurvasinh Puvar, Janvi Raval, Zarna Patel, Monika Gandhi, Pinal Trivedi, Maharshi Pandya, Nidhi Patel, Nitin Savaliya, Raghawendra Kumar, Dinesh Kumar, Zuber Saiyed, Komal Patel, Labdhi Pandya, Snehal Bagatharia, Armi Chaudhari, R D Dixit, A M Kadri, Harsh Bakshi, Chaitanya Joshi, Madhvi Joshi                                                                   |
| EPI_ISL_467041                                                                                                                                                                                                                                                                                                                                                                                                                                                                                                                                                                                                                                                                                                 | B.J. Medical College and Civil hospital                                                                                                                                                                                                                              | Gujarat Biotechnology Research Centre                                                                                         | Monika Gandhi, Pinal Trivedi, Maharshi Pandya, Nidhi Patel, Nitin Savaliya, Raghawendra Kumar, Dinesh Kumar, Zuber Saiyed, Komal Patel, Labdhi Pandya, Snehal Bagatharia, Pranay Shah, Kamlesh J Upadhyay, Nirav Mungalpara, Tejas Shah, Ankit Hinsu, Pritesh Sabara, Apurvasinh Puvar, Janvi Raval, Zarna Patel, Priyanka P Vatsa, R D Dixit, A M Kadri, Harsh Bakshi, Chaitanya Joshi, Madhvi Joshi                                           |
| EPI_ISL_467042                                                                                                                                                                                                                                                                                                                                                                                                                                                                                                                                                                                                                                                                                                 | B.J. Medical College and Civil hospital                                                                                                                                                                                                                              | Gujarat Biotechnology Research Centre                                                                                         | Pinal Trivedi, Maharshi Pandya, Nidhi Patel, Nitin Savaliya, Raghawendra Kumar, Dinesh Kumar, Zuber Saiyed, Komal Patel, Labdhi Pandya, Snehal Bagatharia, Pranay Shah, Kamlesh J Upadhyay, Nirav Mungalpara, Tejas Shah, Ankit Hinsu, Pritesh Sabara, Apurvasinh Puvar, Janvi Raval, Zarna Patel, Monika Gandhi, Pooja P Doshi, R D Dixit, A M Kadri, Harsh Bakshi, Chaitanya Joshi, Madhvi Joshi                                              |
| EPI_ISL_467043                                                                                                                                                                                                                                                                                                                                                                                                                                                                                                                                                                                                                                                                                                 | B.J. Medical College and Civil hospital                                                                                                                                                                                                                              | Gujarat Biotechnology Research Centre                                                                                         | Maharshi Pandya, Nidhi Patel, Nitin Savaliya, Raghawendra Kumar, Dinesh Kumar, Zuber Saiyed, Komal Patel, Labdhi Pandya, Snehal Bagatharia, Pranay Shah, Kamlesh J Upadhyay, Nirav Mungalpara, Tejas Shah, Ankit Hinsu, Pritesh Sabara, Apurvasinh Puvar, Janvi Raval, Zarna Patel, Monika Gandhi, Pinal Trivedi, Maharshi Pandya, Nidhi Patel, Nitin Savaliya, Neha Rajpara, R D Dixit, A M Kadri, Harsh Bakshi, Chaitanya Joshi, Madhvi Joshi |
| EPI_ISL_467044                                                                                                                                                                                                                                                                                                                                                                                                                                                                                                                                                                                                                                                                                                 | B.J. Medical College and Civil hospital                                                                                                                                                                                                                              | Gujarat Biotechnology Research Centre                                                                                         | Nidhi Patel, Nitin Savaliya, Raghawendra Kumar, Dinesh Kumar, Zuber Saiyed, Komal Patel, Labdhi Pandya, Snehal Bagatharia, Pranay Shah, Kamlesh J Upadhyay, Nirav Mungalpara, Tejas Shah, Ankit Hinsu, Pritesh Sabara, Apurvasinh Puvar, Janvi Raval, Zarna Patel, Pinal Trivedi, Maharshi Pandya, Priti Pandita, R D Dixit, A M Kadri, Harsh Bakshi, Chaitanya Joshi, Madhvi Joshi                                                             |
| EPI_ISL_467045                                                                                                                                                                                                                                                                                                                                                                                                                                                                                                                                                                                                                                                                                                 | B.J. Medical College and Civil hospital                                                                                                                                                                                                                              | Gujarat Biotechnology Research Centre                                                                                         | Nitin Savaliya, Raghawendra Kumar, Dinesh Kumar, Zuber Saiyed, Komal Patel, Labdhi Pandya, Snehal Bagatharia, Pranay Shah, Kamlesh J Upadhyay, Nirav Mungalpara, Tejas Shah, Ankit Hinsu, Pritesh Sabara, Apurvasinh Puvar, Janvi Raval, Zarna Patel, Monika Gandhi, Pinal Trivedi, Maharshi Pandya, Bhavya Jindal, R D Dixit, A M Kadri, Harsh Bakshi, Chaitanya Joshi, Madhvi Joshi                                                           |
| EPI_ISL_467046                                                                                                                                                                                                                                                                                                                                                                                                                                                                                                                                                                                                                                                                                                 | B.J. Medical College and Civil hospital                                                                                                                                                                                                                              | Gujarat Biotechnology Research Centre                                                                                         | Raghawendra Kumar, Dinesh Kumar, Zuber Saiyed, Komal Patel, Labdhi Pandya, Snehal Bagatharia, Pranay Shah, Kamlesh J Upadhyay, Nirav Mungalpara, Tejas Shah, Ankit Hinsu, Pritesh Sabara, Apurvasinh Puvar, Janvi Raval, Zarna Patel, Monika Gandhi, Pinal Trivedi, Maharshi Pandya, Nidhi Patel, Nitin Savaliya, Neha Rajpara, R D Dixit, A M Kadri, Harsh Bakshi, Chaitanya Joshi, Madhvi Joshi                                               |
| EPI_ISL_467047                                                                                                                                                                                                                                                                                                                                                                                                                                                                                                                                                                                                                                                                                                 | B.J. Medical College and Civil hospital                                                                                                                                                                                                                              | Gujarat Biotechnology Research Centre                                                                                         | Dinesh Kumar, Zuber Saiyed, Komal Patel, Labdhi Pandya, Snehal Bagatharia, Pranay Shah, Kamlesh J Upadhyay, Nirav Mungalpara, Tejas Shah, Ankit Hinsu, Pritesh Sabara, Apurvasinh Puvar, Janvi Raval, Zarna Patel, Monika Gandhi, Pinal Trivedi, Maharshi Pandya, Bhavya Jindal, R D Dixit, A M Kadri, Harsh Bakshi, Chaitanya Joshi, Madhvi Joshi                                                                                              |
| EPI_ISL_467048                                                                                                                                                                                                                                                                                                                                                                                                                                                                                                                                                                                                                                                                                                 | B.J. Medical College and Civil hospital                                                                                                                                                                                                                              | Gujarat Biotechnology Research Centre                                                                                         | Zuber Saiyed, Komal Patel, Labdhi Pandya, Snehal Bagatharia, Pranay Shah, Kamlesh J Upadhyay, Nirav Mungalpara, Tejas Shah, Ankit Hinsu, Pritesh Sabara, Apurvasinh Puvar, Janvi Raval, Zarna Patel, Monika Gandhi, Pinal Trivedi, Maharshi Pandya, Nidhi Patel, Nitin Savaliya, Raghawendra Kumar, Dinesh Kumar, Fenil Patel, R D Dixit, A M Kadri, Harsh Bakshi, Chaitanya Joshi, Madhvi Joshi                                                |
| EPI_ISL_467049                                                                                                                                                                                                                                                                                                                                                                                                                                                                                                                                                                                                                                                                                                 | B.J. Medical College and Civil hospital                                                                                                                                                                                                                              | Gujarat Biotechnology Research Centre                                                                                         | Komal Patel, Labdhi Pandya, Snehal Bagatharia, Pranay Shah, Kamlesh J Upadhyay, Nirav Mungalpara, Tejas Shah, Ankit Hinsu, Pritesh Sabara, Apurvasinh Puvar, Janvi Raval, Zarna Patel, Monika Gandhi, Pinal Trivedi, Maharshi Pandya, Nidhi Patel, Nitin Savaliya, Raghawendra Kumar, Dinesh Kumar, Zuber Saiyed, Neelam Nathani, R D Dixit, A M Kadri, Harsh Bakshi, Chaitanya Joshi, Madhvi Joshi                                             |
| EPI_ISL_467050                                                                                                                                                                                                                                                                                                                                                                                                                                                                                                                                                                                                                                                                                                 | B.J. Medical College and Civil hospital                                                                                                                                                                                                                              | Gujarat Biotechnology Research Centre                                                                                         | Labdhi Pandya, Snehal Bagatharia, Pranay Shah, Kamlesh J Upadhyay, Nirav Mungalpara, Tejas Shah, Ankit Hinsu, Pritesh Sabara, Apurvasinh Puvar, Janvi Raval, Zarna Patel, Monika Gandhi, Pinal Trivedi, Maharshi Pandya, Nidhi Patel, Nitin Savaliya, Raghawendra Kumar, Dinesh Kumar, Zuber Saiyed, Komal Patel, Armi Chaudhari, R D Dixit, A M Kadri, Harsh Bakshi, Chaitanya Joshi, Madhvi Joshi                                             |
| EPI_ISL_467051                                                                                                                                                                                                                                                                                                                                                                                                                                                                                                                                                                                                                                                                                                 | B.J. Medical College and Civil hospital                                                                                                                                                                                                                              | Gujarat Biotechnology Research Centre                                                                                         | Snehal Bagatharia, Pranay Shah, Kamlesh J Upadhyay, Nirav Mungalpara, Tejas Shah, Ankit Hinsu, Pritesh Sabara, Apurvasinh Puvar, Janvi Raval, Zarna Patel, Monika Gandhi, Pinal Trivedi, Maharshi Pandya, Nidhi Patel, Nitin Savaliya, Raghawendra Kumar, Dinesh Kumar, Zuber Saiyed, Komal Patel, Labdhi Pandya, Bhavya Jindal, R D Dixit, A M Kadri, Harsh Bakshi, Chaitanya Joshi, Madhvi Joshi                                              |
| EPI_ISL_467052                                                                                                                                                                                                                                                                                                                                                                                                                                                                                                                                                                                                                                                                                                 | B.J. Medical College and Civil hospital                                                                                                                                                                                                                              | Gujarat Biotechnology Research Centre                                                                                         | Pranay Shah, Kamlesh J Upadhyay, Nirav Mungalpara, Tejas Shah, Ankit Hinsu, Pritesh Sabara, Apurvasinh Puvar, Janvi Raval, Zarna Patel, Monika Gandhi, Pinal Trivedi, Maharshi Pandya, Nidhi Patel, Nitin Savaliya, Raghawendra Kumar, Dinesh Kumar, Zuber Saiyed, Komal Patel, Labdhi Pandya, Snehal Bagatharia, Priyanka P Vatsa, R D Dixit, A M Kadri, Harsh Bakshi, Chaitanya Joshi, Madhvi Joshi                                           |
| EPI_ISL_467053                                                                                                                                                                                                                                                                                                                                                                                                                                                                                                                                                                                                                                                                                                 | B.J. Medical College and Civil hospital                                                                                                                                                                                                                              | Gujarat Biotechnology Research Centre                                                                                         | Kamlesh J Upadhyay, Nirav Mungalpara, Tejas Shah, Ankit Hinsu, Pritesh Sabara, Apurvasinh Puvar, Janvi Raval, Zarna Patel, Monika Gandhi, Pinal Trivedi, Maharshi Pandya, Nidhi Patel, Nitin Savaliya, Raghawendra Kumar, Dinesh Kumar, Zuber Saiyed, Komal Patel, Labdhi Pandya, Snehal Bagatharia, Pranay Shah, Pooja P Doshi, R D Dixit, A M Kadri, Harsh Bakshi, Chaitanya Joshi, Madhvi Joshi                                              |
| EPI_ISL_467054                                                                                                                                                                                                                                                                                                                                                                                                                                                                                                                                                                                                                                                                                                 | B.J. Medical College and Civil hospital                                                                                                                                                                                                                              | Gujarat Biotechnology Research Centre                                                                                         | Nirav Mungalpara, Tejas Shah, Ankit Hinsu, Pritesh Sabara, Apurvasinh Puvar, Janvi Raval, Zarna Patel, Monika Gandhi, Pinal Trivedi, Maharshi Pandya, Nidhi Patel, Nitin Savaliya, Raghawendra Kumar, Dinesh Kumar, Zuber Saiyed, Komal Patel, Labdhi Pandya, Snehal Bagatharia, Pranay Shah, Kamlesh J Upadhyay, Akanksha Verma, R D Dixit, A M Kadri, Harsh Bakshi, Chaitanya Joshi, Madhvi Joshi                                             |
| EPI_ISL_467300                                                                                                                                                                                                                                                                                                                                                                                                                                                                                                                                                                                                                                                                                                 | General Hospital "Abdulah Nakas"                                                                                                                                                                                                                                     | Alea Genetic Center                                                                                                           | Rijad Kohjodic; Lana Salihefendic; Teufik Goletic; Sead Jazic; Dino Pecar; Nihad Fejzić; Damir Marjanovic; Enis Kandić                                                                                                                                                                                                                                                                                                                          |
| EPI_ISL_467352, EPI_ISL_467353, EPI_ISL_467367, EPI_ISL_467369                                                                                                                                                                                                                                                                                                                                                                                                                                                                                                                                                                                                                                                 | Laboratory of Respiratory Viruses and Measles, Oswaldo Cruz Institute, FIOCRUZ                                                                                                                                                                                       | Laboratory of Respiratory Viruses and Measles, Oswaldo Cruz Institute, FIOCRUZ                                                | Paola Resende, Luciana Appolinario, Fernando Motta, Ana Carolina Paixão, Ana Carolina Mendonça, Aline Mendes, Milene Miranda, Cristiana Garcia, Braulvia Caetano, Maria Ogrzewalska, Jonathan Lopes, Marilda Siqueira                                                                                                                                                                                                                           |
| EPI_ISL_467374                                                                                                                                                                                                                                                                                                                                                                                                                                                                                                                                                                                                                                                                                                 | Dinkes Samarinda                                                                                                                                                                                                                                                     | Eijkman Institute for Molecular Biology, Ministry of Research and Technology/National Agency for Research and Innovation      | Edison Johar, Frilasisa A Yudhaputri, Hidayat Trimarsanto, David H Muljono, Safarina G Malik, Khin Saw Myint, Amin Soebandrio                                                                                                                                                                                                                                                                                                                   |
| EPI_ISL_467375                                                                                                                                                                                                                                                                                                                                                                                                                                                                                                                                                                                                                                                                                                 | RSUP Prof. Dr. R. Kandou Manado                                                                                                                                                                                                                                      | Eijkman Institute for Molecular Biology, Ministry of Research and Technology/National Agency for Research and Innovation      | Edison Johar, Frilasisa A Yudhaputri, Hidayat Trimarsanto, David H Muljono, Safarina G Malik, Khin Saw Myint, Amin Soebandrio                                                                                                                                                                                                                                                                                                                   |
| EPI_ISL_467376                                                                                                                                                                                                                                                                                                                                                                                                                                                                                                                                                                                                                                                                                                 | RSUP Fatmawati                                                                                                                                                                                                                                                       | Eijkman Institute for Molecular Biology, Ministry of Research and Technology/National Agency for Research and Innovation      | Edison Johar, Frilasisa A Yudhaputri, Hidayat Trimarsanto, David H Muljono, Safarina G Malik, Khin Saw Myint, Amin Soebandrio                                                                                                                                                                                                                                                                                                                   |
| EPI_ISL_467774, EPI_ISL_467775                                                                                                                                                                                                                                                                                                                                                                                                                                                                                                                                                                                                                                                                                 | Molecular diagnostic laboratory of Federal Budget Institution of Science "Central Research Institute of Epidemiology" of The Federal Service on Customers' Rights Protection and Human Well-being Surveillance                                                       | Group of Genomics and Postgenomic Technologies of Central Research Institute of Epidemiology                                  | Speranskaya AS, Kaptelova VV, Samoilov AE, Korneenko EV, Sizova TV, Tivanova EV, Shipulina OY, Akimkin YG                                                                                                                                                                                                                                                                                                                                       |
| EPI_ISL_467809                                                                                                                                                                                                                                                                                                                                                                                                                                                                                                                                                                                                                                                                                                 | Cedars-Sinai Medical Center, Department of Pathology & Laboratory Medicine, Molecular Pathology Laboratory                                                                                                                                                           | Cedars-Sinai Medical Center, Molecular Pathology Laboratory of Department of Pathology & Laboratory Medicine and Genomic Core | Wenjuan Zhang, John Paul Govindavari, Brian Davis, Stephanie Chen, Jong Taek Kim, Jianbo Song, Jean Lopategui, Jasmine T Plummer, Eric Vail                                                                                                                                                                                                                                                                                                     |
| EPI_ISL_468134, EPI_ISL_468135, EPI_ISL_468136, EPI_ISL_468137, EPI_ISL_468138, EPI_ISL_468139, EPI_ISL_468140, EPI_ISL_468141, EPI_ISL_468143, EPI_ISL_468144, EPI_ISL_468145, EPI_ISL_468146, EPI_ISL_468147, EPI_ISL_468148, EPI_ISL_468149, EPI_ISL_468150, EPI_ISL_468153, EPI_ISL_468154, EPI_ISL_468155, EPI_ISL_468156, EPI_ISL_468158                                                                                                                                                                                                                                                                                                                                                                 | see above<br>[Romania, Bucharest] National Institute for Infectious Diseases "Prof. Dr. Matei Bals"                                                                                                                                                                  | [Romania, Bucharest] National Institute for Infectious Diseases "Prof. Dr. Matei Bals"                                        | Leontina Banica, Marius Cotic, Corina Casanguiu, Marius Surleac, Simona Paraschiv                                                                                                                                                                                                                                                                                                                                                               |
| EPI_ISL_468305, EPI_ISL_468307                                                                                                                                                                                                                                                                                                                                                                                                                                                                                                                                                                                                                                                                                 | Centro de Vigilancia a Saude de Diadema                                                                                                                                                                                                                              | Instituto Adolfo Lutz, Interdisciplinary Procedures Center, Strategic Laboratory                                              | Claudio Tavares Sacchi, Claudia Regina Gonçalves, Erica Valessa Ramos Gomes                                                                                                                                                                                                                                                                                                                                                                     |
| EPI_ISL_468308                                                                                                                                                                                                                                                                                                                                                                                                                                                                                                                                                                                                                                                                                                 | Hospital Municipal do Tatuape Carmino Caricchio                                                                                                                                                                                                                      | Instituto Adolfo Lutz, Interdisciplinary Procedures Center, Strategic Laboratory                                              | Claudio Tavares Sacchi, Claudia Regina Gonçalves, Erica Valessa Ramos Gomes                                                                                                                                                                                                                                                                                                                                                                     |
| EPI_ISL_468310                                                                                                                                                                                                                                                                                                                                                                                                                                                                                                                                                                                                                                                                                                 | Hospital Sao Paulo de Ensino da UNIFESP                                                                                                                                                                                                                              | Instituto Adolfo Lutz, Interdisciplinary Procedures Center, Strategic Laboratory                                              | Claudio Tavares Sacchi, Claudia Regina Gonçalves, Erica Valessa Ramos Gomes                                                                                                                                                                                                                                                                                                                                                                     |
| EPI_ISL_468311, EPI_ISL_468312                                                                                                                                                                                                                                                                                                                                                                                                                                                                                                                                                                                                                                                                                 | Hospital Municipal Dr Ignacio Proenca de Gouvea                                                                                                                                                                                                                      | Instituto Adolfo Lutz, Interdisciplinary Procedures Center, Strategic Laboratory                                              | Claudio Tavares Sacchi, Claudia Regina Gonçalves, Erica Valessa Ramos Gomes                                                                                                                                                                                                                                                                                                                                                                     |
| EPI_ISL_468313                                                                                                                                                                                                                                                                                                                                                                                                                                                                                                                                                                                                                                                                                                 | Vigilancia Epidemiologica de São Bernardo do Campo                                                                                                                                                                                                                   | Instituto Adolfo Lutz, Interdisciplinary Procedures Center, Strategic Laboratory                                              | Claudio Tavares Sacchi, Claudia Regina Gonçalves, Erica Valessa Ramos Gomes                                                                                                                                                                                                                                                                                                                                                                     |
| EPI_ISL_468314                                                                                                                                                                                                                                                                                                                                                                                                                                                                                                                                                                                                                                                                                                 | CPA Centro de Testagem e Aconselhamento                                                                                                                                                                                                                              | Instituto Adolfo Lutz, Interdisciplinary Procedures Center, Strategic Laboratory                                              | Claudio Tavares Sacchi, Claudia Regina Gonçalves, Erica Valessa Ramos Gomes                                                                                                                                                                                                                                                                                                                                                                     |
| EPI_ISL_468315                                                                                                                                                                                                                                                                                                                                                                                                                                                                                                                                                                                                                                                                                                 | Hospital Municipal do Tatuape Carmino Caricchio                                                                                                                                                                                                                      | Instituto Adolfo Lutz, Interdisciplinary Procedures Center, Strategic Laboratory                                              | Claudio Tavares Sacchi, Claudia Regina Gonçalves, Erica Valessa Ramos Gomes                                                                                                                                                                                                                                                                                                                                                                     |
| EPI_ISL_468316                                                                                                                                                                                                                                                                                                                                                                                                                                                                                                                                                                                                                                                                                                 | UPA Vila Assis                                                                                                                                                                                                                                                       | Instituto Adolfo Lutz, Interdisciplinary Procedures Center, Strategic Laboratory                                              | Claudio Tavares Sacchi, Claudia Regina Gonçalves, Erica Valessa Ramos Gomes                                                                                                                                                                                                                                                                                                                                                                     |
| EPI_ISL_468318                                                                                                                                                                                                                                                                                                                                                                                                                                                                                                                                                                                                                                                                                                 | Hospital Universitario da USP                                                                                                                                                                                                                                        | Instituto Adolfo Lutz, Interdisciplinary Procedures Center, Strategic Laboratory                                              | Claudio Tavares Sacchi, Claudia Regina Gonçalves, Erica Valessa Ramos Gomes                                                                                                                                                                                                                                                                                                                                                                     |
| EPI_ISL_468319                                                                                                                                                                                                                                                                                                                                                                                                                                                                                                                                                                                                                                                                                                 | Vigilancia Epidemiologica de São Bernardo do Campo                                                                                                                                                                                                                   | Instituto Adolfo Lutz, Interdisciplinary Procedures Center, Strategic Laboratory                                              | Claudio Tavares Sacchi, Claudia Regina Gonçalves, Erica Valessa Ramos Gomes                                                                                                                                                                                                                                                                                                                                                                     |
| EPI_ISL_468320                                                                                                                                                                                                                                                                                                                                                                                                                                                                                                                                                                                                                                                                                                 | Secretaria Municipal de Saude de Hortolandia                                                                                                                                                                                                                         | Instituto Adolfo Lutz, Interdisciplinary Procedures Center, Strategic Laboratory                                              | Claudio Tavares Sacchi, Claudia Regina Gonçalves, Erica Valessa Ramos Gomes                                                                                                                                                                                                                                                                                                                                                                     |
| EPI_ISL_468321                                                                                                                                                                                                                                                                                                                                                                                                                                                                                                                                                                                                                                                                                                 | Hospital Universitario da USP                                                                                                                                                                                                                                        | Instituto Adolfo Lutz, Interdisciplinary Procedures Center, Strategic Laboratory                                              | Claudio Tavares Sacchi, Claudia Regina Gonçalves, Erica Valessa Ramos Gomes                                                                                                                                                                                                                                                                                                                                                                     |
| EPI_ISL_468591, EPI_ISL_468596                                                                                                                                                                                                                                                                                                                                                                                                                                                                                                                                                                                                                                                                                 | Institute for Public Health                                                                                                                                                                                                                                          | Laboratory for advanced genomics                                                                                              | Filip Rokić, Lovro Trgovce-Greif, Neven Sutić, Tomislav Rukavina, Igor Jurak, Oliver Vugrek                                                                                                                                                                                                                                                                                                                                                     |
| EPI_ISL_468765, EPI_ISL_468766, EPI_ISL_468768, EPI_ISL_468771, EPI_ISL_468772, EPI_ISL_468774, EPI_ISL_468775, EPI_ISL_468776, EPI_ISL_468777, EPI_ISL_468780, EPI_ISL_468782, EPI_ISL_468788, EPI_ISL_468791, EPI_ISL_468793, EPI_ISL_468795, EPI_ISL_468798, EPI_ISL_468800, EPI_ISL_468801, EPI_ISL_468802, EPI_ISL_468803, EPI_ISL_468804, EPI_ISL_468805, EPI_ISL_468806, EPI_ISL_468807, EPI_ISL_468808, EPI_ISL_468809, EPI_ISL_468810, EPI_ISL_468812, EPI_ISL_468814, EPI_ISL_468815, EPI_ISL_468817, EPI_ISL_468820, EPI_ISL_468829, EPI_ISL_468830, EPI_ISL_468832, EPI_ISL_468834, EPI_ISL_468835, EPI_ISL_468841, EPI_ISL_468849, EPI_ISL_468851, EPI_ISL_468855, EPI_ISL_468858, EPI_ISL_468859 | see above<br>Servicio de Microbiología, Hospital Miguel Servet, Zaragoza                                                                                                                                                                                             | SeqCOVID-SPAIN consortium/IBV(CSIC)                                                                                           | Antonio Rezusta López, Alexander Tristancho Baró, Ana Milagro, Yolanda Gracia Grotaloup, Nieves Martínez Cameo and SeqCOVID-SPAIN consortium                                                                                                                                                                                                                                                                                                    |
| EPI_ISL_468914                                                                                                                                                                                                                                                                                                                                                                                                                                                                                                                                                                                                                                                                                                 | Istituto Zooprofilattico Sperimentale Puglia e Basilicata; Dipartimento di Bioscienze, Biotecnologie e Biofarmaceutica dell'Università degli Studi di Bari "A.Moro"; Istituto di Biomembrane, Bioenergetica e Biotecnologie Molecolari del Consiglio Nazionale delle | Beaconlab (Bioinformatics, Evolution and Comparative Genomics lab), Dept of Biosciences, University on Milan                  | Parisi A.,Pesole G., Manzari C., Chiara M.                                                                                                                                                                                                                                                                                                                                                                                                      |

| EPI_ISL                                        | IRIS                                             | Institution                                                                                                                                                                                                                                                                           | Country | PIs                                                                                                                                                                                                                                                                                                                                                                                                |
|------------------------------------------------|--------------------------------------------------|---------------------------------------------------------------------------------------------------------------------------------------------------------------------------------------------------------------------------------------------------------------------------------------|---------|----------------------------------------------------------------------------------------------------------------------------------------------------------------------------------------------------------------------------------------------------------------------------------------------------------------------------------------------------------------------------------------------------|
| EPI_ISL_469020, EPI_ISL_469022                 | Ricerche di Bari                                 | Istituto Zooprofilattico Sperimentale Puglia e Basilicata; Dipartimento di Bioscienze, Biotecnologie e Biofarmaceutica dell'Università degli Studi di Bari "A.Moro"; Istituto di Biomembrane, Bioenergetica e Biotecnologie Molecolari del Consiglio Nazionale delle Ricerche di Bari | Italy   | Parisi A.,Pesole G., Manzari C., Chiara M.                                                                                                                                                                                                                                                                                                                                                         |
| EPI_ISL_469023                                 | Ricerche di Bari                                 | Istituto Zooprofilattico Sperimentale Puglia e Basilicata; Dipartimento di Bioscienze, Biotecnologie e Biofarmaceutica dell'Università degli Studi di Bari "A.Moro"; Istituto di Biomembrane, Bioenergetica e Biotecnologie Molecolari del Consiglio Nazionale delle Ricerche di Bari | Italy   | Parisi A.,Pesole G., Manzari C., Chiara M                                                                                                                                                                                                                                                                                                                                                          |
| EPI_ISL_469024                                 | B.J. Medical College and Civil hospital          | Gujarat Biotechnology Research Centre                                                                                                                                                                                                                                                 | India   | Tejas Shah, Ankit Hinsu, Pritesh Sabara, Apurvasinh Puvar, Janvi Raval, Zarna Patel, Monika Gandhi, Pinal Trivedi, Maharshi Pandya, Nidhi Patel, Nitin Savaliya, Raghawendra Kumar, Dinesh Kumar, Zuber Saiyed, Komal Patel, Labdhi Pandya, Snehal Bagatharia, Pranay Shah, Kamlesh J Upadhyay, Nirav Mungalpara, Priti Pandita, R D Dixit, A M Kadri, Harsh Bakshi, Chaitanya Joshi, Madhvi Joshi |
| EPI_ISL_469025                                 | B.J. Medical College and Civil hospital          | Gujarat Biotechnology Research Centre                                                                                                                                                                                                                                                 | India   | Ankit Hinsu, Pritesh Sabara, Apurvasinh Puvar, Janvi Raval, Zarna Patel, Monika Gandhi, Pinal Trivedi, Maharshi Pandya, Nidhi Patel, Nitin Savaliya, Raghawendra Kumar, Dinesh Kumar, Zuber Saiyed, Komal Patel, Labdhi Pandya, Snehal Bagatharia, Pranay Shah, Kamlesh J Upadhyay, Nirav Mungalpara, Tejas Shah, Pragya Sharma, R D Dixit, A M Kadri, Harsh Bakshi, Chaitanya Joshi, Madhvi Joshi |
| EPI_ISL_469026                                 | B.J. Medical College and Civil hospital          | Gujarat Biotechnology Research Centre                                                                                                                                                                                                                                                 | India   | Pritesh Sabara, Apurvasinh Puvar, Janvi Raval, Zarna Patel, Monika Gandhi, Pinal Trivedi, Maharshi Pandya, Nidhi Patel, Nitin Savaliya, Raghawendra Kumar, Dinesh Kumar, Zuber Saiyed, Komal Patel, Labdhi Pandya, Snehal Bagatharia, Pranay Shah, Kamlesh J Upadhyay, Nirav Mungalpara, Tejas Shah, Ankit Hinsu, Neha Rajpara, R D Dixit, A M Kadri, Harsh Bakshi, Chaitanya Joshi, Madhvi Joshi  |
| EPI_ISL_469027                                 | B.J. Medical College and Civil hospital          | Gujarat Biotechnology Research Centre                                                                                                                                                                                                                                                 | India   | Apurvasinh Puvar, Janvi Raval, Zarna Patel, Monika Gandhi, Pinal Trivedi, Maharshi Pandya, Nidhi Patel, Nitin Savaliya, Raghawendra Kumar, Dinesh Kumar, Zuber Saiyed, Komal Patel, Labdhi Pandya, Snehal Bagatharia, Pranay Shah, Kamlesh J Upadhyay, Nirav Mungalpara, Tejas Shah, Ankit Hinsu, Pritesh Sabara, Afzal Ansari, R D Dixit, A M Kadri, Harsh Bakshi, Chaitanya Joshi, Madhvi Joshi  |
| EPI_ISL_469028                                 | B.J. Medical College and Civil hospital          | Gujarat Biotechnology Research Centre                                                                                                                                                                                                                                                 | India   | Janvi Raval, Zarna Patel, Monika Gandhi, Pinal Trivedi, Maharshi Pandya, Nidhi Patel, Nitin Savaliya, Raghawendra Kumar, Dinesh Kumar, Zuber Saiyed, Komal Patel, Labdhi Pandya, Snehal Bagatharia, Pranay Shah, Kamlesh J Upadhyay, Nirav Mungalpara, Tejas Shah, Ankit Hinsu, Pritesh Sabara, Apurvasinh Puvar, Fenil Patel, R D Dixit, A M Kadri, Harsh Bakshi, Chaitanya Joshi, Madhvi Joshi   |
| EPI_ISL_469029                                 | Government Medical College, Vadodara             | Gujarat Biotechnology Research Centre                                                                                                                                                                                                                                                 | India   | Zarna Patel, Monika Gandhi, Pinal Trivedi, Maharshi Pandya, Nidhi Patel, Nitin Savaliya, Raghawendra Kumar, Dinesh Kumar, Zuber Saiyed, Komal Patel, Labdhi Pandya, Snehal Bagatharia, Meenakshi Shah, Neena Doshi, Varsha Godbole, Tejas Shah, Ankit Hinsu, Pritesh Sabara, Apurvasinh Puvar, Janvi Raval, Neelam Nathani, R D Dixit, A M Kadri, Harsh Bakshi, Chaitanya Joshi, Madhvi Joshi      |
| EPI_ISL_469030                                 | Government Medical College, Vadodara             | Gujarat Biotechnology Research Centre                                                                                                                                                                                                                                                 | India   | Monika Gandhi, Pinal Trivedi, Maharshi Pandya, Nidhi Patel, Nitin Savaliya, Raghawendra Kumar, Dinesh Kumar, Zuber Saiyed, Komal Patel, Labdhi Pandya, Snehal Bagatharia, Meenakshi Shah, Neena Doshi, Varsha Godbole, Tejas Shah, Ankit Hinsu, Pritesh Sabara, Apurvasinh Puvar, Janvi Raval, Zarna Patel, Armi Chaudhari, R D Dixit, A M Kadri, Harsh Bakshi, Chaitanya Joshi, Madhvi Joshi      |
| EPI_ISL_469031                                 | Government Medical College, Vadodara             | Gujarat Biotechnology Research Centre                                                                                                                                                                                                                                                 | India   | Pinal Trivedi, Maharshi Pandya, Nidhi Patel, Nitin Savaliya, Raghawendra Kumar, Dinesh Kumar, Zuber Saiyed, Komal Patel, Labdhi Pandya, Snehal Bagatharia, Meenakshi Shah, Neena Doshi, Varsha Godbole, Tejas Shah, Ankit Hinsu, Pritesh Sabara, Apurvasinh Puvar, Janvi Raval, Zarna Patel, Monika Gandhi, Bhavya Jindal, R D Dixit, A M Kadri, Harsh Bakshi, Chaitanya Joshi, Madhvi Joshi       |
| EPI_ISL_469032                                 | Government Medical College, Vadodara             | Gujarat Biotechnology Research Centre                                                                                                                                                                                                                                                 | India   | Maharshi Pandya, Nidhi Patel, Nitin Savaliya, Raghawendra Kumar, Dinesh Kumar, Zuber Saiyed, Komal Patel, Labdhi Pandya, Snehal Bagatharia, Meenakshi Shah, Neena Doshi, Varsha Godbole, Tejas Shah, Ankit Hinsu, Pritesh Sabara, Apurvasinh Puvar, Janvi Raval, Zarna Patel, Monika Gandhi, Pinal Trivedi, Pragya Sharma, R D Dixit, A M Kadri, Harsh Bakshi, Chaitanya Joshi, Madhvi Joshi       |
| EPI_ISL_469033                                 | Government Medical College, Vadodara             | Gujarat Biotechnology Research Centre                                                                                                                                                                                                                                                 | India   | Nidhi Patel, Nitin Savaliya, Raghawendra Kumar, Dinesh Kumar, Zuber Saiyed, Komal Patel, Labdhi Pandya, Snehal Bagatharia, Meenakshi Shah, Neena Doshi, Varsha Godbole, Tejas Shah, Ankit Hinsu, Pritesh Sabara, Apurvasinh Puvar, Janvi Raval, Zarna Patel, Monika Gandhi, Pinal Trivedi, Maharshi Pandya, Priyanka P Vatsa, R D Dixit, A M Kadri, Harsh Bakshi, Chaitanya Joshi, Madhvi Joshi    |
| EPI_ISL_469034                                 | Government Medical College, Vadodara             | Gujarat Biotechnology Research Centre                                                                                                                                                                                                                                                 | India   | Nitin Savaliya, Raghawendra Kumar, Dinesh Kumar, Zuber Saiyed, Komal Patel, Labdhi Pandya, Snehal Bagatharia, Meenakshi Shah, Neena Doshi, Varsha Godbole, Tejas Shah, Ankit Hinsu, Pritesh Sabara, Apurvasinh Puvar, Janvi Raval, Zarna Patel, Monika Gandhi, Pinal Trivedi, Maharshi Pandya, Nidhi Patel, Pooja P Doshi, R D Dixit, A M Kadri, Harsh Bakshi, Chaitanya Joshi, Madhvi Joshi       |
| EPI_ISL_469035                                 | Government Medical College, Vadodara             | Gujarat Biotechnology Research Centre                                                                                                                                                                                                                                                 | India   | Raghawendra Kumar, Dinesh Kumar, Zuber Saiyed, Komal Patel, Labdhi Pandya, Snehal Bagatharia, Meenakshi Shah, Neena Doshi, Varsha Godbole, Tejas Shah, Ankit Hinsu, Pritesh Sabara, Apurvasinh Puvar, Janvi Raval, Zarna Patel, Monika Gandhi, Pinal Trivedi, Maharshi Pandya, Nidhi Patel, Nitin Savaliya, Akanksha Verma, R D Dixit, A M Kadri, Harsh Bakshi, Chaitanya Joshi, Madhvi Joshi      |
| EPI_ISL_469036                                 | Government Medical College, Vadodara             | Gujarat Biotechnology Research Centre                                                                                                                                                                                                                                                 | India   | Dinesh Kumar, Zuber Saiyed, Komal Patel, Labdhi Pandya, Snehal Bagatharia, Meenakshi Shah, Neena Doshi, Varsha Godbole, Tejas Shah, Ankit Hinsu, Pritesh Sabara, Apurvasinh Puvar, Janvi Raval, Zarna Patel, Monika Gandhi, Pinal Trivedi, Maharshi Pandya, Nidhi Patel, Nitin Savaliya, Raghawendra Kumar, Priti Pandita, R D Dixit, A M Kadri, Harsh Bakshi, Chaitanya Joshi, Madhvi Joshi       |
| EPI_ISL_469037                                 | GMERS Medical College & Hospital                 | Gujarat Biotechnology Research Centre                                                                                                                                                                                                                                                 | India   | Zuber Saiyed, Komal Patel, Labdhi Pandya, Snehal Bagatharia, Meenakshi Shah, Neena Doshi, Varsha Godbole, Tejas Shah, Ankit Hinsu, Pritesh Sabara, Apurvasinh Puvar, Janvi Raval, Zarna Patel, Monika Gandhi, Pinal Trivedi, Maharshi Pandya, Nidhi Patel, Nitin Savaliya, Raghawendra Kumar, Dinesh Kumar, Pragya Sharma, R D Dixit, A M Kadri, Harsh Bakshi, Chaitanya Joshi, Madhvi Joshi       |
| EPI_ISL_469038                                 | GMERS Medical College & Hospital                 | Gujarat Biotechnology Research Centre                                                                                                                                                                                                                                                 | India   | Komal Patel, Labdhi Pandya, Snehal Bagatharia, Meenakshi Shah, Neena Doshi, Varsha Godbole, Tejas Shah, Ankit Hinsu, Pritesh Sabara, Apurvasinh Puvar, Janvi Raval, Zarna Patel, Monika Gandhi, Pinal Trivedi, Maharshi Pandya, Nidhi Patel, Nitin Savaliya, Raghawendra Kumar, Dinesh Kumar, Zuber Saiyed, Neha Rajpara, R D Dixit, A M Kadri, Harsh Bakshi, Chaitanya Joshi, Madhvi Joshi        |
| EPI_ISL_469039                                 | GMERS Medical College & Hospital                 | Gujarat Biotechnology Research Centre                                                                                                                                                                                                                                                 | India   | Labdhi Pandya, Snehal Bagatharia, Meenakshi Shah, Neena Doshi, Varsha Godbole, Tejas Shah, Ankit Hinsu, Pritesh Sabara, Apurvasinh Puvar, Janvi Raval, Zarna Patel, Monika Gandhi, Pinal Trivedi, Maharshi Pandya, Nidhi Patel, Nitin Savaliya, Raghawendra Kumar, Dinesh Kumar, Zuber Saiyed, Komal Patel, Afzal Ansari, R D Dixit, A M Kadri, Harsh Bakshi, Chaitanya Joshi, Madhvi Joshi        |
| EPI_ISL_469040                                 | GMERS Medical College & Hospital                 | Gujarat Biotechnology Research Centre                                                                                                                                                                                                                                                 | India   | Snehal Bagatharia, Meenakshi Shah, Neena Doshi, Varsha Godbole, Tejas Shah, Ankit Hinsu, Pritesh Sabara, Apurvasinh Puvar, Janvi Raval, Zarna Patel, Monika Gandhi, Pinal Trivedi, Maharshi Pandya, Nidhi Patel, Nitin Savaliya, Raghawendra Kumar, Dinesh Kumar, Zuber Saiyed, Komal Patel, Labdhi Pandya, Fenil Patel, R D Dixit, A M Kadri, Harsh Bakshi, Chaitanya Joshi, Madhvi Joshi         |
| EPI_ISL_469041                                 | GMERS Medical College & Hospital                 | Gujarat Biotechnology Research Centre                                                                                                                                                                                                                                                 | India   | Meenakshi Shah, Neena Doshi, Varsha Godbole, Tejas Shah, Ankit Hinsu, Pritesh Sabara, Apurvasinh Puvar, Janvi Raval, Zarna Patel, Monika Gandhi, Pinal Trivedi, Maharshi Pandya, Nidhi Patel, Nitin Savaliya, Raghawendra Kumar, Dinesh Kumar, Zuber Saiyed, Komal Patel, Labdhi Pandya, Snehal Bagatharia, Neelam Nathani, R D Dixit, A M Kadri, Harsh Bakshi, Chaitanya Joshi, Madhvi Joshi      |
| EPI_ISL_469042                                 | GMERS Medical College & Hospital                 | Gujarat Biotechnology Research Centre                                                                                                                                                                                                                                                 | India   | Neena Doshi, Varsha Godbole, Tejas Shah, Ankit Hinsu, Pritesh Sabara, Apurvasinh Puvar, Janvi Raval, Zarna Patel, Monika Gandhi, Pinal Trivedi, Maharshi Pandya, Nidhi Patel, Nitin Savaliya, Raghawendra Kumar, Dinesh Kumar, Zuber Saiyed, Komal Patel, Labdhi Pandya, Snehal Bagatharia, Meenakshi Shah, Armi Chaudhari, R D Dixit, A M Kadri, Harsh Bakshi, Chaitanya Joshi, Madhvi Joshi      |
| EPI_ISL_469043                                 | Dr. N. D. Desai Medical College & Hospital       | Gujarat Biotechnology Research Centre                                                                                                                                                                                                                                                 | India   | J G Buch, Jigar Gusani, Supreet Prabhu, Tejas Shah, Ankit Hinsu, Pritesh Sabara, Apurvasinh Puvar, Janvi Raval, Zarna Patel, Monika Gandhi, Pinal Trivedi, Maharshi Pandya, Nidhi Patel, Nitin Savaliya, Raghawendra Kumar, Dinesh Kumar, Zuber Saiyed, Komal Patel, Labdhi Pandya, Snehal Bagatharia, Bhavya Jindal, R D Dixit, A M Kadri, Harsh Bakshi, Chaitanya Joshi, Madhvi Joshi            |
| EPI_ISL_469044                                 | Dr. N. D. Desai Medical College & Hospital       | Gujarat Biotechnology Research Centre                                                                                                                                                                                                                                                 | India   | Jigar Gusani, Supreet Prabhu, Tejas Shah, Ankit Hinsu, Pritesh Sabara, Apurvasinh Puvar, Janvi Raval, Zarna Patel, Monika Gandhi, Pinal Trivedi, Maharshi Pandya, Nidhi Patel, Nitin Savaliya, Raghawendra Kumar, Dinesh Kumar, Zuber Saiyed, Komal Patel, Labdhi Pandya, Snehal Bagatharia, J G Buch, Neha Rajpara, R D Dixit, A M Kadri, Harsh Bakshi, Chaitanya Joshi, Madhvi Joshi             |
| EPI_ISL_469045                                 | Dr. N. D. Desai Medical College & Hospital       | Gujarat Biotechnology Research Centre                                                                                                                                                                                                                                                 | India   | Supreet Prabhu, Tejas Shah, Ankit Hinsu, Pritesh Sabara, Apurvasinh Puvar, Janvi Raval, Zarna Patel, Monika Gandhi, Pinal Trivedi, Maharshi Pandya, Nidhi Patel, Nitin Savaliya, Raghawendra Kumar, Dinesh Kumar, Zuber Saiyed, Komal Patel, Labdhi Pandya, Snehal Bagatharia, J G Buch, Jigar Gusani, Priyanka P Vatsa, R D Dixit, A M Kadri, Harsh Bakshi, Chaitanya Joshi, Madhvi Joshi         |
| EPI_ISL_469046                                 | Dr. N. D. Desai Medical College & Hospital       | Gujarat Biotechnology Research Centre                                                                                                                                                                                                                                                 | India   | Tejas Shah, Ankit Hinsu, Pritesh Sabara, Apurvasinh Puvar, Janvi Raval, Zarna Patel, Monika Gandhi, Pinal Trivedi, Maharshi Pandya, Nidhi Patel, Nitin Savaliya, Raghawendra Kumar, Dinesh Kumar, Zuber Saiyed, Komal Patel, Labdhi Pandya, Snehal Bagatharia, J G Buch, Jigar Gusani, Supreet Prabhu, Pooja P Doshi, R D Dixit, A M Kadri, Harsh Bakshi, Chaitanya Joshi, Madhvi Joshi            |
| EPI_ISL_469047                                 | Dr. N. D. Desai Medical College & Hospital       | Gujarat Biotechnology Research Centre                                                                                                                                                                                                                                                 | India   | Ankit Hinsu, Pritesh Sabara, Apurvasinh Puvar, Janvi Raval, Zarna Patel, Monika Gandhi, Pinal Trivedi, Maharshi Pandya, Nidhi Patel, Nitin Savaliya, Raghawendra Kumar, Dinesh Kumar, Zuber Saiyed, Komal Patel, Labdhi Pandya, Snehal Bagatharia, J G Buch, Jigar Gusani, Supreet Prabhu, Tejas Shah, Akanksha Verma, R D Dixit, A M Kadri, Harsh Bakshi, Chaitanya Joshi, Madhvi Joshi           |
| EPI_ISL_469048                                 | Banas Medical College and Research Institute     | Gujarat Biotechnology Research Centre                                                                                                                                                                                                                                                 | India   | Radhika Khara, Sunil R Joshi, Viren S Doshi, Zarna Patel, Monika Gandhi, Pinal Trivedi, Maharshi Pandya, Nidhi Patel, Nitin Savaliya, Raghawendra Kumar, Dinesh Kumar, Zuber Saiyed, Komal Patel, Labdhi Pandya, Snehal Bagatharia, Tejas Shah, Ankit Hinsu, Pritesh Sabara, Apurvasinh Puvar, Janvi Raval, Priti Pandita, R D Dixit, A M Kadri, Harsh Bakshi, Chaitanya Joshi, Madhvi Joshi       |
| EPI_ISL_469275                                 | Egyptian National Cancer Institute (ENCI)        | Human Genome Center                                                                                                                                                                                                                                                                   | Egypt   | Zekri, Abdel Rahman N, Amer,K.E., Ahmed,O.S., Soliman,H.K., Hafez,M.M., Bahnassy,A.A., Abdelhamid,W., Gad,A., Ali,M., Hassan,W., Samir,M., Raouf,A., Hamdy,M.S., Soliman,M.S., Elsisy,M.H., Elkhatteeb,S.M., Ezzelarab,M.H., Abouelhoda, Mohamed                                                                                                                                                   |
| EPI_ISL_469282                                 | Service de Virologie Hôpital Saint-Louis         | Laboratory of Cell Biology of viral infection, Unit INSERM-U944                                                                                                                                                                                                                       | France  | Laurent Meertens, Lucie Bonnet-Madin, Constance Delaugerre, Ali Amara                                                                                                                                                                                                                                                                                                                              |
| EPI_ISL_469283, EPI_ISL_469284                 | Service de Virologie Hôpital Saint-Louis         | Laboratory Cell Biology of viral infection-INSERM unit 944                                                                                                                                                                                                                            | France  | Laurent Meertens, Lucie Bonnet-Madin, Séverine Mercier-Delarue, Maud SALMONA, Constance Delaugerre, Ali Amara                                                                                                                                                                                                                                                                                      |
| EPI_ISL_470896                                 | Russian State Collection of Viruses              | Pathogenic Microorganisms Variability Laboratory                                                                                                                                                                                                                                      | Russia  | Alexey Shchetinin, Maria Nikiforova, Elena Shidlovskaya, Nadezhda Kuznetsova, Inna Dolzhikova, Daria Grousova, Andrey Botikov, Denis Logunov, Alexander Gintsburg, Vladimir Gushchin                                                                                                                                                                                                               |
| EPI_ISL_470897, EPI_ISL_470898, EPI_ISL_470899 | Pathogenic Microorganisms Variability Laboratory | Pathogenic Microorganisms Variability Laboratory                                                                                                                                                                                                                                      | Russia  | Alexey Shchetinin, Maria Nikiforova, Elena Shidlovskaya, Nadezhda Kuznetsova, Andrey Botikov, Alexander Gintsburg, Vladimir Gushchin                                                                                                                                                                                                                                                               |

|                                                                                                                |                                                                                                                                             |                                                                                                                                                                |                                                                                                                                                                                                                                                                                                                                                                                                                                                                                                                                                   |
|----------------------------------------------------------------------------------------------------------------|---------------------------------------------------------------------------------------------------------------------------------------------|----------------------------------------------------------------------------------------------------------------------------------------------------------------|---------------------------------------------------------------------------------------------------------------------------------------------------------------------------------------------------------------------------------------------------------------------------------------------------------------------------------------------------------------------------------------------------------------------------------------------------------------------------------------------------------------------------------------------------|
| EPI_ISL_470900, EPI_ISL_470901, EPI_ISL_470902                                                                 | Influenza etiology and epidemiology laboratory                                                                                              | Pathogenic Microorganisms Variability Laboratory                                                                                                               | Alexey Shchetinin, Maria Nikiforova, Elena Shidlovskaya, Nadezhda Kuznetsova, Vladimir Golubchkin, Inna Dolzhikova, Daria Grousova, Andrey Botikov, Denis Logunov, Kirill Krasnoslobtsev, Svetlana Trushakova, Elena Burtseva, Ludmila Kolobukhina, Svetlana Smetanina, Alexander Gintsburg                                                                                                                                                                                                                                                       |
| EPI_ISL_470903, EPI_ISL_470904                                                                                 | Influenza etiology and epidemiology laboratory                                                                                              | Pathogenic Microorganisms Variability Laboratory                                                                                                               | Alexey Shchetinin, Maria Nikiforova, Elena Shidlovskaya, Nadezhda Kuznetsova, Vladimir Golubchkin, Inna Dolzhikova, Daria Grousova, Andrey Botikov, Denis Logunov, Anna Ignatieva, Evgeniya Mukasheva, Elena Burtseva, Ludmila Kolobukhina, Svetlana Smetanina, Alexander Gintsburg                                                                                                                                                                                                                                                               |
| EPI_ISL_471158, EPI_ISL_471163, EPI_ISL_471164, EPI_ISL_471167, EPI_ISL_471171                                 | MRCG at LSHTM Genomics lab                                                                                                                  | MRCG at LSHTM Genomics lab                                                                                                                                     | Sesay et al                                                                                                                                                                                                                                                                                                                                                                                                                                                                                                                                       |
| EPI_ISL_471267                                                                                                 | Hospital IESS Babahoyo                                                                                                                      | Institute of Microbiology, Universidad San Francisco de Quito                                                                                                  | Sully Márquez, Belén Prado-Vivar, Juan José Guadalupe, Bernardo Gutiérrez, Francisco Cordova, Ninfa Henriquez, Killen Briones-Zamora, Killen Briones-Claudette, Verónica Barragán, Patricio Rojas-Silva, Gabriel Trueba, Michelle Grunauer, Paúl Cárdenas                                                                                                                                                                                                                                                                                         |
| EPI_ISL_471269                                                                                                 | Hospital Oncológico Solca Núcleo de Quito                                                                                                   | Institute of Microbiology, Universidad San Francisco de Quito                                                                                                  | Sully Márquez, Belén Prado-Vivar, Juan José Guadalupe, Bernardo Gutiérrez, Marcos Di Stefano, Grace Salazar, Verónica Barragán, Patricio Rojas-Silva, Gabriel Trueba, Michelle Grunauer, Paúl Cárdenas                                                                                                                                                                                                                                                                                                                                            |
| EPI_ISL_471270                                                                                                 | Hospital Oncológico Solca Núcleo de Quito                                                                                                   | Institute of Microbiology, Universidad San Francisco de Quito                                                                                                  | Sully Márquez, Belén Prado-Vivar, Juan José Guadalupe, Bernardo Gutiérrez, Marcos Di Stefano, Grace Salazar, Verónica Barragán, Patricio Rojas-Silva, Gabriel Trueba, Michelle Grunauer, Paúl Cárdenas                                                                                                                                                                                                                                                                                                                                            |
| EPI_ISL_471271                                                                                                 | Hospital Oncológico Solca Núcleo de Quito                                                                                                   | Institute of Microbiology, Universidad San Francisco de Quito                                                                                                  | Sully Márquez, Belén Prado-Vivar, Juan José Guadalupe, Bernardo Gutiérrez, Marcos Di Stefano, Grace Salazar, Verónica Barragán, Patricio Rojas-Silva, Gabriel Trueba, Michelle Grunauer, Paúl Cárdenas                                                                                                                                                                                                                                                                                                                                            |
| EPI_ISL_471416, EPI_ISL_471417, EPI_ISL_471419, EPI_ISL_471420, EPI_ISL_471422, EPI_ISL_471423, EPI_ISL_471424 | Laboratory for Respiratory Viruses, National Influenza Centre, Cantacuzino National Military-Medical Institute for Research and Development | Cantacuzino Institute                                                                                                                                          | Luiza Ustea, Nicoleta Paraschiv, Tim Durfee, Mihaela Lazar                                                                                                                                                                                                                                                                                                                                                                                                                                                                                        |
| EPI_ISL_471456, EPI_ISL_471457, EPI_ISL_471458, EPI_ISL_471459, EPI_ISL_471460                                 | Centre de Virologie des Maladies Tropicales                                                                                                 | Functional Genomic Platform/Service Analyses Biologique/IATRS/ Centre National Pour la Recherche Scientifique Et Technique (CNRS†)                             | Hicham ANNAZ, Elmoustafa EL FAHIME, Marouane MELLOUL, Yassine AKHOUD, Mly Abdelaziz ELALAOUI, Ahmed REGGAD, Sanaa ALAOUI-Amine , Rachid ABI, Rida TAGAJDID, Zhor KASMY, Safaa ELKORCHI, Nadia TOUIL, Farida HILALI, Abdelkader LAATIRIS , Abdellilah LARAQJLI, Tahra BAJOUJ , Yassine SEKHSOKH , Idriss-Amine LAHLOU, Mostafa ELOUENASS, Khalid ENNIBI                                                                                                                                                                                            |
| EPI_ISL_471472                                                                                                 | Hospital Universitari Germans Trias i Pujol(HUGTIP)/Fundació Lluita contra la SIDA (FLSida)/IRTA-CReSA                                      | IrsiCaixa AIDS Research Lab                                                                                                                                    | Marc Noguera-Julian, Pilar Armengol, Jordi Rodón, Julia Vergara, Lidia Ruiz, Nuria Izquierdo, Jorge Carrillo, Roger Paredes, Albert Bensaïd, Julia Blanco, Joaquim Segalés, Bonaventura Clotet                                                                                                                                                                                                                                                                                                                                                    |
| EPI_ISL_471528, EPI_ISL_471530                                                                                 | The National Institute of Public Health Hospital Universitario da USP Sao Paulo                                                             | State Veterinary Institute Prague and The National Institute of Public Health Instituto Adolfo Lutz, Interdisciplinary Procedures Center, Strategic Laboratory | Nagy,AjJirincova,H,Novakova,L,Tmka,D;Vecerova,J                                                                                                                                                                                                                                                                                                                                                                                                                                                                                                   |
| EPI_ISL_471540                                                                                                 | The National Institute of Public Health                                                                                                     | State Veterinary Institute Prague and The National Institute of Public Health                                                                                  | Claudio Tavares Sacchi, Claudia Regina Gonçalves, Erica Valessa Ramos Gomes                                                                                                                                                                                                                                                                                                                                                                                                                                                                       |
| EPI_ISL_471541                                                                                                 | Hospital Geral Santa Marcelina                                                                                                              | Instituto Adolfo Lutz, Interdisciplinary Procedures Center, Strategic Laboratory                                                                               | Nagy,AjJirincova,H,Novakova,L,Tmka,D;Vecerova,J                                                                                                                                                                                                                                                                                                                                                                                                                                                                                                   |
| EPI_ISL_471542                                                                                                 | Secretaria de Saude de Mogi das Cruzes                                                                                                      | Instituto Adolfo Lutz, Interdisciplinary Procedures Center, Strategic Laboratory                                                                               | Claudio Tavares Sacchi, Claudia Regina Gonçalves, Erica Valessa Ramos Gomes                                                                                                                                                                                                                                                                                                                                                                                                                                                                       |
| EPI_ISL_471543                                                                                                 | Centro de Saude I Tacito Leite de Carvalho e Silva                                                                                          | Instituto Adolfo Lutz, Interdisciplinary Procedures Center, Strategic Laboratory                                                                               | Claudio Tavares Sacchi, Claudia Regina Gonçalves, Erica Valessa Ramos Gomes                                                                                                                                                                                                                                                                                                                                                                                                                                                                       |
| EPI_ISL_471544                                                                                                 | The National Institute of Public Health                                                                                                     | State Veterinary Institute Prague and The National Institute of Public Health                                                                                  | Nagy,AjJirincova,H,Novakova,L,Tmka,D;Vecerova,J                                                                                                                                                                                                                                                                                                                                                                                                                                                                                                   |
| EPI_ISL_471545                                                                                                 | Hospital Sao Paulo de Ensino da Unifesp                                                                                                     | Instituto Adolfo Lutz, Interdisciplinary Procedures Center, Strategic Laboratory                                                                               | Claudio Tavares Sacchi, Claudia Regina Gonçalves, Erica Valessa Ramos Gomes                                                                                                                                                                                                                                                                                                                                                                                                                                                                       |
| EPI_ISL_471546                                                                                                 | AMA DR Jose Soares Hungria                                                                                                                  | Instituto Adolfo Lutz, Interdisciplinary Procedures Center, Strategic Laboratory                                                                               | Claudio Tavares Sacchi, Claudia Regina Gonçalves, Erica Valessa Ramos Gomes                                                                                                                                                                                                                                                                                                                                                                                                                                                                       |
| EPI_ISL_471547                                                                                                 | The National Institute of Public Health                                                                                                     | State Veterinary Institute Prague and The National Institute of Public Health                                                                                  | Nagy,AjJirincova,H,Novakova,L,Tmka,D;Vecerova,J                                                                                                                                                                                                                                                                                                                                                                                                                                                                                                   |
| EPI_ISL_471548                                                                                                 | Hospital do Servidor Público Estadual Francisco Morato de Oliveira                                                                          | Instituto Adolfo Lutz, Interdisciplinary Procedures Center, Strategic Laboratory                                                                               | Claudio Tavares Sacchi, Claudia Regina Gonçalves, Erica Valessa Ramos Gomes                                                                                                                                                                                                                                                                                                                                                                                                                                                                       |
| EPI_ISL_471549                                                                                                 | Hospital Municipal Carmen Prudente                                                                                                          | Instituto Adolfo Lutz, Interdisciplinary Procedures Center, Strategic Laboratory                                                                               | Claudio Tavares Sacchi, Claudia Regina Gonçalves, Erica Valessa Ramos Gomes                                                                                                                                                                                                                                                                                                                                                                                                                                                                       |
| EPI_ISL_471550                                                                                                 | The National Institute of Public Health                                                                                                     | State Veterinary Institute Prague and The National Institute of Public Health                                                                                  | Nagy,AjJirincova,H,Novakova,L,Tmka,D;Vecerova,J                                                                                                                                                                                                                                                                                                                                                                                                                                                                                                   |
| EPI_ISL_471551                                                                                                 | Hospital Sao Paulo de Ensino da Unifesp                                                                                                     | Instituto Adolfo Lutz, Interdisciplinary Procedures Center, Strategic Laboratory                                                                               | Claudio Tavares Sacchi, Claudia Regina Gonçalves, Erica Valessa Ramos Gomes                                                                                                                                                                                                                                                                                                                                                                                                                                                                       |
| EPI_ISL_471552                                                                                                 | Hospital Sancta Maggiore                                                                                                                    | Instituto Adolfo Lutz, Interdisciplinary Procedures Center, Strategic Laboratory                                                                               | Claudio Tavares Sacchi, Claudia Regina Gonçalves, Erica Valessa Ramos Gomes                                                                                                                                                                                                                                                                                                                                                                                                                                                                       |
| EPI_ISL_471553                                                                                                 | The National Institute of Public Health                                                                                                     | State Veterinary Institute Prague and The National Institute of Public Health                                                                                  | Nagy,AjJirincova,H,Novakova,L,Tmka,D;Vecerova,J                                                                                                                                                                                                                                                                                                                                                                                                                                                                                                   |
| EPI_ISL_471554                                                                                                 | Hospital Bosque da Saúde                                                                                                                    | Instituto Adolfo Lutz, Interdisciplinary Procedures Center, Strategic Laboratory                                                                               | Claudio Tavares Sacchi, Claudia Regina Gonçalves, Erica Valessa Ramos Gomes                                                                                                                                                                                                                                                                                                                                                                                                                                                                       |
| EPI_ISL_471555                                                                                                 | The National Institute of Public Health                                                                                                     | State Veterinary Institute Prague and The National Institute of Public Health                                                                                  | Nagy,AjJirincova,H,Novakova,L,Tmka,D;Vecerova,J                                                                                                                                                                                                                                                                                                                                                                                                                                                                                                   |
| EPI_ISL_471556                                                                                                 | Pronto Socorro Jose Ibrahim                                                                                                                 | Instituto Adolfo Lutz, Interdisciplinary Procedures Center, Strategic Laboratory                                                                               | Claudio Tavares Sacchi, Claudia Regina Gonçalves, Erica Valessa Ramos Gomes                                                                                                                                                                                                                                                                                                                                                                                                                                                                       |
| EPI_ISL_471562, EPI_ISL_471581, EPI_ISL_471582                                                                 | Hosp. Municipal Prof. Dr. Alípio Corrêa Netto                                                                                               | Instituto Adolfo Lutz, Interdisciplinary Procedures Center, Strategic Laboratory                                                                               | Claudio Tavares Sacchi, Claudia Regina Gonçalves, Erica Valessa Ramos Gomes                                                                                                                                                                                                                                                                                                                                                                                                                                                                       |
| EPI_ISL_471647                                                                                                 | Hospital Municipal de Barueri Dr. Francisco Moran                                                                                           | Instituto Adolfo Lutz, Interdisciplinary Procedures Center, Strategic Laboratory                                                                               | Claudio Tavares Sacchi, Claudia Regina Gonçalves, Erica Valessa Ramos Gomes                                                                                                                                                                                                                                                                                                                                                                                                                                                                       |
| EPI_ISL_471648                                                                                                 | UBS e Pronto Socorro Jd. Jacira                                                                                                             | Instituto Adolfo Lutz, Interdisciplinary Procedures Center, Strategic Laboratory                                                                               | Claudio Tavares Sacchi, Claudia Regina Gonçalves, Erica Valessa Ramos Gomes                                                                                                                                                                                                                                                                                                                                                                                                                                                                       |
| EPI_ISL_475026                                                                                                 | Banas Medical College and Research Institute                                                                                                | Gujarat Biotechnology Research Centre                                                                                                                          | Sunil R Joshi, Viren s Doshi, Pritesh Sabara, Apurvasinh Puvav, Janvi Raval, Zarna Patel, Monika Gandhi, Pinal Trivedi, Maharshi Pandya, Nidhi Patel, Nitin Savaliya, Raghawendra Kumar, Dinesh Kumar, Zuber Saiyed, Komal Patel, Labdhi Pandya, Snehal Bagatharia, Radhika Khara, Neha Rajpara, R D Dixit, A M Kadri, Harsh Bakshi, Chaitanya Joshi, Madhvi Joshi                                                                                                                                                                                |
| EPI_ISL_475027                                                                                                 | Banas Medical College and Research Institute                                                                                                | Gujarat Biotechnology Research Centre                                                                                                                          | Viren s Doshi, Pritesh Sabara, Apurvasinh Puvav, Janvi Raval, Zarna Patel, Monika Gandhi, Pinal Trivedi, Maharshi Pandya, Nidhi Patel, Nitin Savaliya, Raghawendra Kumar, Dinesh Kumar, Zuber Saiyed, Komal Patel, Labdhi Pandya, Snehal Bagatharia, Radhika Khara, Sunil R Joshi, Afzal Ansari, R D Dixit, A M Kadri, Harsh Bakshi, Chaitanya Joshi, Madhvi Joshi                                                                                                                                                                                |
| EPI_ISL_475028                                                                                                 | Banas Medical College and Research Institute                                                                                                | Gujarat Biotechnology Research Centre                                                                                                                          | Pritesh Sabara, Apurvasinh Puvav, Janvi Raval, Zarna Patel, Monika Gandhi, Pinal Trivedi, Maharshi Pandya, Nidhi Patel, Nitin Savaliya, Raghawendra Kumar, Dinesh Kumar, Zuber Saiyed, Komal Patel, Labdhi Pandya, Snehal Bagatharia, Radhika Khara, Sunil R Joshi, Viren s Doshi, Fenil Patel, R D Dixit, A M Kadri, Harsh Bakshi, Chaitanya Joshi, Madhvi Joshi                                                                                                                                                                                 |
| EPI_ISL_475029                                                                                                 | Banas Medical College and Research Institute                                                                                                | Gujarat Biotechnology Research Centre                                                                                                                          | Apurvasinh Puvav, Janvi Raval, Zarna Patel, Monika Gandhi, Pinal Trivedi, Maharshi Pandya, Nidhi Patel, Nitin Savaliya, Raghawendra Kumar, Dinesh Kumar, Zuber Saiyed, Komal Patel, Labdhi Pandya, Snehal Bagatharia, Radhika Khara, Sunil R Joshi, Viren s Doshi, Pritesh Sabara, Neelam Nathani, R D Dixit, A M Kadri, Harsh Bakshi, Chaitanya Joshi, Madhvi Joshi                                                                                                                                                                              |
| EPI_ISL_475030                                                                                                 | Department of MicroBiology, Government Medical College, Surat                                                                               | Gujarat Biotechnology Research Centre                                                                                                                          | Janvi Raval, Zarna Patel, Monika Gandhi, Pinal Trivedi, Maharshi Pandya, Nidhi Patel, Nitin Savaliya, Raghawendra Kumar, Dinesh Kumar, Zuber Saiyed, Komal Patel, Labdhi Pandya, Snehal Bagatharia, Naresh Chauhan, Summaiya Mullan, Amit gamit, Pritesh Sabara, Apurvasinh Puvav, Armi Chaudhari, R D Dixit, A M Kadri, Harsh Bakshi, Chaitanya Joshi, Madhvi Joshi                                                                                                                                                                              |
| EPI_ISL_475031                                                                                                 | Department of MicroBiology, Government Medical College, Surat                                                                               | Gujarat Biotechnology Research Centre                                                                                                                          | Zarna Patel, Monika Gandhi, Pinal Trivedi, Maharshi Pandya, Nidhi Patel, Nitin Savaliya, Raghawendra Kumar, Dinesh Kumar, Zuber Saiyed, Komal Patel, Labdhi Pandya, Snehal Bagatharia, Naresh Chauhan, Summaiya Mullan, Amit gamit, Pritesh Sabara, Apurvasinh Puvav, Janvi Raval, Bhavya Jindal, R D Dixit, A M Kadri, Harsh Bakshi, Chaitanya Joshi, Madhvi Joshi                                                                                                                                                                               |
| EPI_ISL_475032                                                                                                 | Department of MicroBiology, Government Medical College, Surat                                                                               | Gujarat Biotechnology Research Centre                                                                                                                          | Monika Gandhi, Pinal Trivedi, Maharshi Pandya, Nidhi Patel, Nitin Savaliya, Raghawendra Kumar, Dinesh Kumar, Zuber Saiyed, Komal Patel, Labdhi Pandya, Snehal Bagatharia, Naresh Chauhan, Summaiya Mullan, Amit gamit, Pritesh Sabara, Apurvasinh Puvav, Janvi Raval, Zarna Patel, Priyanka P Vatsa, R D Dixit, A M Kadri, Harsh Bakshi, Chaitanya Joshi, Madhvi Joshi                                                                                                                                                                            |
| EPI_ISL_475033                                                                                                 | Department of MicroBiology, Government Medical College, Surat                                                                               | Gujarat Biotechnology Research Centre                                                                                                                          | Pinal Trivedi, Maharshi Pandya, Nidhi Patel, Nitin Savaliya, Raghawendra Kumar, Dinesh Kumar, Zuber Saiyed, Komal Patel, Labdhi Pandya, Snehal Bagatharia, Naresh Chauhan, Summaiya Mullan, Amit gamit, Pritesh Sabara, Apurvasinh Puvav, Janvi Raval, Zarna Patel, Monika Gandhi, Pooja P Doshi, R D Dixit, A M Kadri, Harsh Bakshi, Chaitanya Joshi, Madhvi Joshi                                                                                                                                                                               |
| EPI_ISL_475034                                                                                                 | Department of MicroBiology, Government Medical College, Surat                                                                               | Gujarat Biotechnology Research Centre                                                                                                                          | Maharshi Pandya, Nidhi Patel, Nitin Savaliya, Raghawendra Kumar, Dinesh Kumar, Zuber Saiyed, Komal Patel, Labdhi Pandya, Snehal Bagatharia, Naresh Chauhan, Summaiya Mullan, Amit gamit, Pritesh Sabara, Apurvasinh Puvav, Janvi Raval, Zarna Patel, Monika Gandhi, Pinal Trivedi, Akanksha Verma, R D Dixit, A M Kadri, Harsh Bakshi, Chaitanya Joshi, Madhvi Joshi                                                                                                                                                                              |
| EPI_ISL_475035                                                                                                 | Department of MicroBiology, Government Medical College, Surat                                                                               | Gujarat Biotechnology Research Centre                                                                                                                          | Nidhi Patel, Nitin Savaliya, Raghawendra Kumar, Dinesh Kumar, Zuber Saiyed, Komal Patel, Labdhi Pandya, Snehal Bagatharia, Naresh Chauhan, Summaiya Mullan, Amit gamit, Pritesh Sabara, Apurvasinh Puvav, Janvi Raval, Zarna Patel, Monika Gandhi, Pinal Trivedi, Maharshi Pandya, Priti Pandita, R D Dixit, A M Kadri, Harsh Bakshi, Chaitanya Joshi, Madhvi Joshi                                                                                                                                                                               |
| EPI_ISL_475036                                                                                                 | Department of MicroBiology, Government Medical College, Surat                                                                               | Gujarat Biotechnology Research Centre                                                                                                                          | Nitin Savaliya, Raghawendra Kumar, Dinesh Kumar, Zuber Saiyed, Komal Patel, Labdhi Pandya, Snehal Bagatharia, Naresh Chauhan, Summaiya Mullan, Amit gamit, Pritesh Sabara, Apurvasinh Puvav, Janvi Raval, Zarna Patel, Monika Gandhi, Pinal Trivedi, Maharshi Pandya, Nidhi Patel, Pragy Sharma, R D Dixit, A M Kadri, Harsh Bakshi, Chaitanya Joshi, Madhvi Joshi                                                                                                                                                                                |
| EPI_ISL_475037                                                                                                 | Department of MicroBiology, Government Medical College, Surat                                                                               | Gujarat Biotechnology Research Centre                                                                                                                          | Raghawendra Kumar, Dinesh Kumar, Zuber Saiyed, Komal Patel, Labdhi Pandya, Snehal Bagatharia, Naresh Chauhan, Summaiya Mullan, Amit gamit, Pritesh Sabara, Apurvasinh Puvav, Janvi Raval, Zarna Patel, Monika Gandhi, Pinal Trivedi, Maharshi Pandya, Nidhi Patel, Nitin Savaliya, Raghawendra Kumar, Dinesh Kumar, Zuber Saiyed, Komal Patel, Labdhi Pandya, Snehal Bagatharia, Naresh Chauhan, Summaiya Mullan, Amit gamit, Pritesh Sabara, Apurvasinh Puvav, Armi Chaudhari, R D Dixit, A M Kadri, Harsh Bakshi, Chaitanya Joshi, Madhvi Joshi |
| EPI_ISL_475038                                                                                                 | Department of MicroBiology, Government Medical College, Surat                                                                               | Gujarat Biotechnology Research Centre                                                                                                                          | Dinesh Kumar, Zuber Saiyed, Komal Patel, Labdhi Pandya, Snehal Bagatharia, Naresh Chauhan, Summaiya Mullan, Amit gamit, Pritesh Sabara, Apurvasinh Puvav, Janvi Raval, Zarna Patel, Monika Gandhi, Pinal Trivedi, Maharshi Pandya, Nidhi Patel, Nitin Savaliya, Raghawendra Kumar, Dinesh Kumar, Fenil Patel, R D Dixit, A M Kadri, Harsh Bakshi, Chaitanya Joshi, Madhvi Joshi                                                                                                                                                                   |
| EPI_ISL_475039                                                                                                 | Department of MicroBiology, Government Medical College, Surat                                                                               | Gujarat Biotechnology Research Centre                                                                                                                          | Zuber Saiyed, Komal Patel, Labdhi Pandya, Snehal Bagatharia, Naresh Chauhan, Summaiya Mullan, Amit gamit, Pritesh Sabara, Apurvasinh Puvav, Janvi Raval, Zarna Patel, Monika Gandhi, Pinal Trivedi, Maharshi Pandya, Nidhi Patel, Nitin Savaliya, Raghawendra Kumar, Dinesh Kumar, Fenil Patel, R D Dixit, A M Kadri, Harsh Bakshi, Chaitanya Joshi, Madhvi Joshi                                                                                                                                                                                 |
| EPI_ISL_475040                                                                                                 | Department of MicroBiology, Government Medical College, Surat                                                                               | Gujarat Biotechnology Research Centre                                                                                                                          | Komal Patel, Labdhi Pandya, Snehal Bagatharia, Naresh Chauhan, Summaiya Mullan, Amit gamit, Pritesh Sabara, Apurvasinh Puvav, Janvi Raval, Zarna Patel, Monika Gandhi, Pinal Trivedi, Maharshi Pandya, Nidhi Patel, Nitin Savaliya, Raghawendra Kumar, Dinesh Kumar, Zuber Saiyed, Neelam Nathani, R D Dixit, A M Kadri, Harsh Bakshi, Chaitanya Joshi, Madhvi Joshi                                                                                                                                                                              |
| EPI_ISL_475043                                                                                                 | Department of MicroBiology, Government Medical College, Surat                                                                               | Gujarat Biotechnology Research Centre                                                                                                                          | Naresh Chauhan, Summaiya Mullan, Amit gamit, Pritesh Sabara, Apurvasinh Puvav, Janvi Raval, Zarna Patel, Monika Gandhi, Pinal Trivedi, Maharshi Pandya, Nidhi Patel, Nitin Savaliya, Raghawendra Kumar, Dinesh Kumar, Zuber Saiyed, Komal Patel, Labdhi Pandya, Snehal Bagatharia, Priyanka P Vatsa, R D Dixit, A M Kadri, Harsh Bakshi, Chaitanya Joshi, Madhvi Joshi                                                                                                                                                                            |
| EPI_ISL_475044                                                                                                 | Department of MicroBiology, Government Medical College, Surat                                                                               | Gujarat Biotechnology Research Centre                                                                                                                          | Summaiya Mullan, Amit gamit, Pritesh Sabara, Apurvasinh Puvav, Janvi Raval, Zarna Patel, Monika Gandhi, Pinal Trivedi, Maharshi Pandya, Nidhi Patel, Nitin Savaliya, Raghawendra Kumar, Dinesh Kumar, Zuber Saiyed, Komal Patel, Labdhi Pandya, Snehal Bagatharia, Naresh Chauhan, Pooja P Doshi, R D Dixit, A M Kadri, Harsh Bakshi, Chaitanya Joshi, Madhvi Joshi                                                                                                                                                                               |

|                                                                                                                                                                                                                                                                                                                                                                                                                                                                                                                                                                                                                                                                                                                                                                                                                                                                                                                                                                                                                                                                                                                                                                                                                                                                                                                                                                                                                                                                                                                                                                                                                                                                                                                                                                                                                                                                                                                                                                                                                                                                                                                                                                                |                                                                                                            |                                                                                                                                                                                                                                                                                                                 |                                                                                                                                                                                                                                                                                                                                                                                       |
|--------------------------------------------------------------------------------------------------------------------------------------------------------------------------------------------------------------------------------------------------------------------------------------------------------------------------------------------------------------------------------------------------------------------------------------------------------------------------------------------------------------------------------------------------------------------------------------------------------------------------------------------------------------------------------------------------------------------------------------------------------------------------------------------------------------------------------------------------------------------------------------------------------------------------------------------------------------------------------------------------------------------------------------------------------------------------------------------------------------------------------------------------------------------------------------------------------------------------------------------------------------------------------------------------------------------------------------------------------------------------------------------------------------------------------------------------------------------------------------------------------------------------------------------------------------------------------------------------------------------------------------------------------------------------------------------------------------------------------------------------------------------------------------------------------------------------------------------------------------------------------------------------------------------------------------------------------------------------------------------------------------------------------------------------------------------------------------------------------------------------------------------------------------------------------|------------------------------------------------------------------------------------------------------------|-----------------------------------------------------------------------------------------------------------------------------------------------------------------------------------------------------------------------------------------------------------------------------------------------------------------|---------------------------------------------------------------------------------------------------------------------------------------------------------------------------------------------------------------------------------------------------------------------------------------------------------------------------------------------------------------------------------------|
| EPI_ISL_475045                                                                                                                                                                                                                                                                                                                                                                                                                                                                                                                                                                                                                                                                                                                                                                                                                                                                                                                                                                                                                                                                                                                                                                                                                                                                                                                                                                                                                                                                                                                                                                                                                                                                                                                                                                                                                                                                                                                                                                                                                                                                                                                                                                 | Department of MicroBiology, Government Medical College, Surat                                              | Gujarat Biotechnology Research Centre                                                                                                                                                                                                                                                                           | Amit gamit, Pritesh Sabara, Apurvasinh Puvav, Janvi Raval, Zarna Patel, Monika Gandhi, Pinal Trivedi, Maharshi Pandya, Nidhi Patel, Nitin Savaliya, Raghawendra Kumar, Dinesh Kumar, Zuber Saiyed, Komal Patel, Labdhi Pandya, Snehal Bagatharia, Naresh Chauhan, Summalya Mullan, Akanksha Verma, R D Dixit, A M Kadri, Harsh Bakshi, Chaitanya Joshi, Madhvi Joshi                  |
| EPI_ISL_475046                                                                                                                                                                                                                                                                                                                                                                                                                                                                                                                                                                                                                                                                                                                                                                                                                                                                                                                                                                                                                                                                                                                                                                                                                                                                                                                                                                                                                                                                                                                                                                                                                                                                                                                                                                                                                                                                                                                                                                                                                                                                                                                                                                 | Department of MicroBiology, Government Medical College, Surat                                              | Gujarat Biotechnology Research Centre                                                                                                                                                                                                                                                                           | Pritesh Sabara, Apurvasinh Puvav, Janvi Raval, Zarna Patel, Monika Gandhi, Pinal Trivedi, Maharshi Pandya, Nidhi Patel, Nitin Savaliya, Raghawendra Kumar, Dinesh Kumar, Zuber Saiyed, Komal Patel, Labdhi Pandya, Snehal Bagatharia, Naresh Chauhan, Summalya Mullan, Amit gamit, Priti Pandita, R D Dixit, A M Kadri, Harsh Bakshi, Chaitanya Joshi, Madhvi Joshi                   |
| EPI_ISL_475047                                                                                                                                                                                                                                                                                                                                                                                                                                                                                                                                                                                                                                                                                                                                                                                                                                                                                                                                                                                                                                                                                                                                                                                                                                                                                                                                                                                                                                                                                                                                                                                                                                                                                                                                                                                                                                                                                                                                                                                                                                                                                                                                                                 | GMERS Medical College & Hospital                                                                           | Gujarat Biotechnology Research Centre                                                                                                                                                                                                                                                                           | Apurvasinh Puvav, Janvi Raval, Zarna Patel, Monika Gandhi, Pinal Trivedi, Maharshi Pandya, Nidhi Patel, Nitin Savaliya, Raghawendra Kumar, Dinesh Kumar, Zuber Saiyed, Komal Patel, Labdhi Pandya, Snehal Bagatharia, Meenakshi Shah, Neena Doshi, Varsha Godbole, Pritesh Sabara, Pragy Sharma, R D Dixit, A M Kadri, Harsh Bakshi, Chaitanya Joshi, Madhvi Joshi                    |
| EPI_ISL_475048                                                                                                                                                                                                                                                                                                                                                                                                                                                                                                                                                                                                                                                                                                                                                                                                                                                                                                                                                                                                                                                                                                                                                                                                                                                                                                                                                                                                                                                                                                                                                                                                                                                                                                                                                                                                                                                                                                                                                                                                                                                                                                                                                                 | GMERS Medical College & Hospital                                                                           | Gujarat Biotechnology Research Centre                                                                                                                                                                                                                                                                           | Janvi Raval, Zarna Patel, Monika Gandhi, Pinal Trivedi, Maharshi Pandya, Nidhi Patel, Nitin Savaliya, Raghawendra Kumar, Dinesh Kumar, Zuber Saiyed, Komal Patel, Labdhi Pandya, Snehal Bagatharia, Meenakshi Shah, Neena Doshi, Varsha Godbole, Pritesh Sabara, Apurvasinh Puvav, Neha Rajpara, R D Dixit, A M Kadri, Harsh Bakshi, Chaitanya Joshi, Madhvi Joshi                    |
| EPI_ISL_475050                                                                                                                                                                                                                                                                                                                                                                                                                                                                                                                                                                                                                                                                                                                                                                                                                                                                                                                                                                                                                                                                                                                                                                                                                                                                                                                                                                                                                                                                                                                                                                                                                                                                                                                                                                                                                                                                                                                                                                                                                                                                                                                                                                 | GMERS Medical College & Hospital                                                                           | Gujarat Biotechnology Research Centre                                                                                                                                                                                                                                                                           | Monika Gandhi, Pinal Trivedi, Maharshi Pandya, Nidhi Patel, Nitin Savaliya, Raghawendra Kumar, Dinesh Kumar, Zuber Saiyed, Komal Patel, Labdhi Pandya, Snehal Bagatharia, Meenakshi Shah, Neena Doshi, Varsha Godbole, Pritesh Sabara, Apurvasinh Puvav, Janvi Raval, Zarna Patel, Fenil Patel, R D Dixit, A M Kadri, Harsh Bakshi, Chaitanya Joshi, Madhvi Joshi                     |
| EPI_ISL_475051                                                                                                                                                                                                                                                                                                                                                                                                                                                                                                                                                                                                                                                                                                                                                                                                                                                                                                                                                                                                                                                                                                                                                                                                                                                                                                                                                                                                                                                                                                                                                                                                                                                                                                                                                                                                                                                                                                                                                                                                                                                                                                                                                                 | GMERS Medical College & Hospital                                                                           | Gujarat Biotechnology Research Centre                                                                                                                                                                                                                                                                           | Pinal Trivedi, Maharshi Pandya, Nidhi Patel, Nitin Savaliya, Raghawendra Kumar, Dinesh Kumar, Zuber Saiyed, Komal Patel, Labdhi Pandya, Snehal Bagatharia, Meenakshi Shah, Neena Doshi, Varsha Godbole, Pritesh Sabara, Apurvasinh Puvav, Janvi Raval, Zarna Patel, Monika Gandhi, Neelam Nathani, R D Dixit, A M Kadri, Harsh Bakshi, Chaitanya Joshi, Madhvi Joshi                  |
| EPI_ISL_475052                                                                                                                                                                                                                                                                                                                                                                                                                                                                                                                                                                                                                                                                                                                                                                                                                                                                                                                                                                                                                                                                                                                                                                                                                                                                                                                                                                                                                                                                                                                                                                                                                                                                                                                                                                                                                                                                                                                                                                                                                                                                                                                                                                 | GMERS Medical College & Hospital                                                                           | Gujarat Biotechnology Research Centre                                                                                                                                                                                                                                                                           | Maharshi Pandya, Nidhi Patel, Nitin Savaliya, Raghawendra Kumar, Dinesh Kumar, Zuber Saiyed, Komal Patel, Labdhi Pandya, Snehal Bagatharia, Meenakshi Shah, Neena Doshi, Varsha Godbole, Pritesh Sabara, Apurvasinh Puvav, Janvi Raval, Zarna Patel, Monika Gandhi, Pinal Trivedi, Armi Chaudhari, R D Dixit, A M Kadri, Harsh Bakshi, Chaitanya Joshi, Madhvi Joshi                  |
| EPI_ISL_475053                                                                                                                                                                                                                                                                                                                                                                                                                                                                                                                                                                                                                                                                                                                                                                                                                                                                                                                                                                                                                                                                                                                                                                                                                                                                                                                                                                                                                                                                                                                                                                                                                                                                                                                                                                                                                                                                                                                                                                                                                                                                                                                                                                 | GMERS Medical College & Hospital                                                                           | Gujarat Biotechnology Research Centre                                                                                                                                                                                                                                                                           | Nidhi Patel, Nitin Savaliya, Raghawendra Kumar, Dinesh Kumar, Zuber Saiyed, Komal Patel, Labdhi Pandya, Snehal Bagatharia, Meenakshi Shah, Neena Doshi, Varsha Godbole, Pritesh Sabara, Apurvasinh Puvav, Janvi Raval, Zarna Patel, Monika Gandhi, Pinal Trivedi, Maharshi Pandya, Bhavya Jindal, R D Dixit, A M Kadri, Harsh Bakshi, Chaitanya Joshi, Madhvi Joshi                   |
| EPI_ISL_475056                                                                                                                                                                                                                                                                                                                                                                                                                                                                                                                                                                                                                                                                                                                                                                                                                                                                                                                                                                                                                                                                                                                                                                                                                                                                                                                                                                                                                                                                                                                                                                                                                                                                                                                                                                                                                                                                                                                                                                                                                                                                                                                                                                 | Dr. N. D. Desai Medical College & Hospital                                                                 | Gujarat Biotechnology Research Centre                                                                                                                                                                                                                                                                           | Dinesh Kumar, Zuber Saiyed, Komal Patel, Labdhi Pandya, Snehal Bagatharia, J G Buch, Jigar Gusani, Supreet Prabhu, Pritesh Sabara, Apurvasinh Puvav, Janvi Raval, Zarna Patel, Monika Gandhi, Pinal Trivedi, Maharshi Pandya, Nidhi Patel, Nitin Savaliya, Raghawendra Kumar, Akanksha Verma, R D Dixit, A M Kadri, Harsh Bakshi, Chaitanya Joshi, Madhvi Joshi                       |
| EPI_ISL_475057                                                                                                                                                                                                                                                                                                                                                                                                                                                                                                                                                                                                                                                                                                                                                                                                                                                                                                                                                                                                                                                                                                                                                                                                                                                                                                                                                                                                                                                                                                                                                                                                                                                                                                                                                                                                                                                                                                                                                                                                                                                                                                                                                                 | Dr. N. D. Desai Medical College & Hospital                                                                 | Gujarat Biotechnology Research Centre                                                                                                                                                                                                                                                                           | Zuber Saiyed, Komal Patel, Labdhi Pandya, Supreet Prabhu, Snehal Bagatharia, Jigar Gusani, J G Buch, Pritesh Sabara, Apurvasinh Puvav, Janvi Raval, Zarna Patel, Monika Gandhi, Pinal Trivedi, Maharshi Pandya, Nidhi Patel, Nitin Savaliya, Raghawendra Kumar, Dinesh Kumar, Zuber Saiyed, Komal Patel, Labdhi Pandya, Snehal Bagatharia, Chaitanya Joshi, Madhvi Joshi              |
| EPI_ISL_475059                                                                                                                                                                                                                                                                                                                                                                                                                                                                                                                                                                                                                                                                                                                                                                                                                                                                                                                                                                                                                                                                                                                                                                                                                                                                                                                                                                                                                                                                                                                                                                                                                                                                                                                                                                                                                                                                                                                                                                                                                                                                                                                                                                 | GAIMS & G K General Hospital                                                                               | Gujarat Biotechnology Research Centre                                                                                                                                                                                                                                                                           | Hitesh Assudani, Babulal Babhoriya, Labdhi Pandya, Snehal Bagatharia, Pritesh Sabara, Apurvasinh Puvav, Janvi Raval, Zarna Patel, Monika Gandhi, Pinal Trivedi, Maharshi Pandya, Nidhi Patel, Nitin Savaliya, Raghawendra Kumar, Dinesh Kumar, Zuber Saiyed, Komal Patel, Neha Rajpara, R D Dixit, A M Kadri, Harsh Bakshi, Chaitanya Joshi, Madhvi Joshi                             |
| EPI_ISL_475574, EPI_ISL_475576, EPI_ISL_475577, EPI_ISL_475578, EPI_ISL_475579, EPI_ISL_475580, EPI_ISL_475582, EPI_ISL_475583, EPI_ISL_475585, EPI_ISL_475588, EPI_ISL_475590, EPI_ISL_475593, EPI_ISL_475594, EPI_ISL_475595, EPI_ISL_475596, EPI_ISL_475598, EPI_ISL_475599, EPI_ISL_475600, EPI_ISL_475601, EPI_ISL_475602, EPI_ISL_475603, EPI_ISL_475604, EPI_ISL_475605, EPI_ISL_475606, EPI_ISL_475607, EPI_ISL_475608, EPI_ISL_475609, EPI_ISL_475610, EPI_ISL_475611, EPI_ISL_475612, EPI_ISL_475613, EPI_ISL_475614, EPI_ISL_475615, EPI_ISL_475616, EPI_ISL_475617, EPI_ISL_475618, EPI_ISL_475619, EPI_ISL_475620, EPI_ISL_475621, EPI_ISL_475622, EPI_ISL_475623, EPI_ISL_475624, EPI_ISL_475625, EPI_ISL_475626, EPI_ISL_475627, EPI_ISL_475628, EPI_ISL_475629, EPI_ISL_475630, EPI_ISL_475631, EPI_ISL_475632, EPI_ISL_475633, EPI_ISL_475634, EPI_ISL_475635, EPI_ISL_475636, EPI_ISL_475637, EPI_ISL_475638, EPI_ISL_475639, EPI_ISL_475640, EPI_ISL_475641, EPI_ISL_475642, EPI_ISL_475643, EPI_ISL_475644, EPI_ISL_475645, EPI_ISL_475646, EPI_ISL_475647, EPI_ISL_475648, EPI_ISL_475649, EPI_ISL_475650, EPI_ISL_475651, EPI_ISL_475652, EPI_ISL_475653, EPI_ISL_475654, EPI_ISL_475655, EPI_ISL_475656, EPI_ISL_475657, EPI_ISL_475658, EPI_ISL_475659, EPI_ISL_475660, EPI_ISL_475661, EPI_ISL_475662, EPI_ISL_475663, EPI_ISL_475664, EPI_ISL_475665, EPI_ISL_475666, EPI_ISL_475667, EPI_ISL_475668, EPI_ISL_475669, EPI_ISL_475670, EPI_ISL_475671, EPI_ISL_475672, EPI_ISL_475673, EPI_ISL_475674, EPI_ISL_475675, EPI_ISL_475676, EPI_ISL_475677, EPI_ISL_475678, EPI_ISL_475679, EPI_ISL_475680, EPI_ISL_475681, EPI_ISL_475682, EPI_ISL_475683, EPI_ISL_475684, EPI_ISL_475685, EPI_ISL_475686, EPI_ISL_475687, EPI_ISL_475688, EPI_ISL_475689, EPI_ISL_475690, EPI_ISL_475691, EPI_ISL_475692, EPI_ISL_475693, EPI_ISL_475694, EPI_ISL_475695, EPI_ISL_475697, EPI_ISL_475698, EPI_ISL_475699, EPI_ISL_475700, EPI_ISL_475701, EPI_ISL_475702, EPI_ISL_475703, EPI_ISL_475705, EPI_ISL_475706, EPI_ISL_475708, EPI_ISL_475709, EPI_ISL_475710, EPI_ISL_475711, EPI_ISL_475712, EPI_ISL_475713, EPI_ISL_475714, EPI_ISL_475715, EPI_ISL_475716 | Cedars-Sinai Medical Center, Department of Pathology & Laboratory Medicine, Molecular Pathology Laboratory | Cedars-Sinai Medical Center, Molecular Pathology Laboratory of Department of Pathology & Laboratory Medicine and Genomic Core                                                                                                                                                                                   | Wenjuan Zhang, John Paul Govindavari, Brian Davis, Stephanie Chen, Jong Taek Kim, Jianbo Song, Jean Lopategui, Jasmine T Plummer, Eric Vail                                                                                                                                                                                                                                           |
| EPI_ISL_475745, EPI_ISL_475746, EPI_ISL_475747, EPI_ISL_475748, EPI_ISL_475749, EPI_ISL_475751, EPI_ISL_475752, EPI_ISL_475753                                                                                                                                                                                                                                                                                                                                                                                                                                                                                                                                                                                                                                                                                                                                                                                                                                                                                                                                                                                                                                                                                                                                                                                                                                                                                                                                                                                                                                                                                                                                                                                                                                                                                                                                                                                                                                                                                                                                                                                                                                                 | Medical Ain Shams Research Institute (MASRI), Ain Shams University                                         | Medical Ain Shams Research Institute (MASRI), Ain Shams University                                                                                                                                                                                                                                              | Hesham Elghazaly , Sara Hassan Agwa, Mahmood Elmeteni , Ahmad Moustafa , Ashraf Omar, Osama Mansour, Samia Abdo, Hala Hafez, Ghada Ismael , Shaimaa Moustafa , Aya Mohamed, Reham Mamdouh , Hoda Abd Elsatar, Manal Hammad Elsiebi, Fatma Ebad                                                                                                                                        |
| EPI_ISL_476022                                                                                                                                                                                                                                                                                                                                                                                                                                                                                                                                                                                                                                                                                                                                                                                                                                                                                                                                                                                                                                                                                                                                                                                                                                                                                                                                                                                                                                                                                                                                                                                                                                                                                                                                                                                                                                                                                                                                                                                                                                                                                                                                                                 | Defence Research & Development Establishment                                                               | Defence Research & Development Establishment                                                                                                                                                                                                                                                                    | Shashi Sharma, Paban Kumar Dash, Jyoti S Kumar, Sushil Kumar Sharma, Ambuj Shrivastava                                                                                                                                                                                                                                                                                                |
| EPI_ISL_476023                                                                                                                                                                                                                                                                                                                                                                                                                                                                                                                                                                                                                                                                                                                                                                                                                                                                                                                                                                                                                                                                                                                                                                                                                                                                                                                                                                                                                                                                                                                                                                                                                                                                                                                                                                                                                                                                                                                                                                                                                                                                                                                                                                 | Defence Research & Development Establishment (DRDE)                                                        | Defence Research & Development Establishment (DRDE)                                                                                                                                                                                                                                                             | Shashi Sharma, Paban Kumar Dash, Sushil Kumar Sharma, Ambuj Shrivastava, Jyoti S Kumar                                                                                                                                                                                                                                                                                                |
| EPI_ISL_476067                                                                                                                                                                                                                                                                                                                                                                                                                                                                                                                                                                                                                                                                                                                                                                                                                                                                                                                                                                                                                                                                                                                                                                                                                                                                                                                                                                                                                                                                                                                                                                                                                                                                                                                                                                                                                                                                                                                                                                                                                                                                                                                                                                 | The National Institute of Public Health                                                                    | State Veterinary Institute Prague and The National Institute of Public Health                                                                                                                                                                                                                                   | Nagy,Ajririncova,H:Novakova,L:Trnka,D:Vecerova,J                                                                                                                                                                                                                                                                                                                                      |
| EPI_ISL_476148, EPI_ISL_476149, EPI_ISL_476492                                                                                                                                                                                                                                                                                                                                                                                                                                                                                                                                                                                                                                                                                                                                                                                                                                                                                                                                                                                                                                                                                                                                                                                                                                                                                                                                                                                                                                                                                                                                                                                                                                                                                                                                                                                                                                                                                                                                                                                                                                                                                                                                 | Institut Pasteur Dakar                                                                                     | Institut Pasteur de Dakar                                                                                                                                                                                                                                                                                       | Ndongo Dia, Moussa Moise Diagne, Mamadou Diop, Ousmane Faye, Amadou Alpha Sall                                                                                                                                                                                                                                                                                                        |
| EPI_ISL_476493                                                                                                                                                                                                                                                                                                                                                                                                                                                                                                                                                                                                                                                                                                                                                                                                                                                                                                                                                                                                                                                                                                                                                                                                                                                                                                                                                                                                                                                                                                                                                                                                                                                                                                                                                                                                                                                                                                                                                                                                                                                                                                                                                                 | Institut Pasteur Dakar                                                                                     | Institut Pasteur de Dakar                                                                                                                                                                                                                                                                                       | Ndongo Dia, Moussa Moise Diagne, Mamadou Diop, Ousmane Faye, Amadou alpha Sall                                                                                                                                                                                                                                                                                                        |
| EPI_ISL_476494                                                                                                                                                                                                                                                                                                                                                                                                                                                                                                                                                                                                                                                                                                                                                                                                                                                                                                                                                                                                                                                                                                                                                                                                                                                                                                                                                                                                                                                                                                                                                                                                                                                                                                                                                                                                                                                                                                                                                                                                                                                                                                                                                                 | Institut Pasteur Dakar                                                                                     | Institut Pasteur de Dakar                                                                                                                                                                                                                                                                                       | Ndongo Dia, Moussa Moise Diagne, Mamadou Diop, Ousmane Faye, Amadou Alpha Sall                                                                                                                                                                                                                                                                                                        |
| EPI_ISL_476495                                                                                                                                                                                                                                                                                                                                                                                                                                                                                                                                                                                                                                                                                                                                                                                                                                                                                                                                                                                                                                                                                                                                                                                                                                                                                                                                                                                                                                                                                                                                                                                                                                                                                                                                                                                                                                                                                                                                                                                                                                                                                                                                                                 | Institut Pasteur Dakar                                                                                     | Institut Pasteur de Dakar                                                                                                                                                                                                                                                                                       | Ndongo Dia, Moussa Moise Diagne, Mamadou Diop, Ousmane Faye, Amadou alpha Sall                                                                                                                                                                                                                                                                                                        |
| EPI_ISL_476514                                                                                                                                                                                                                                                                                                                                                                                                                                                                                                                                                                                                                                                                                                                                                                                                                                                                                                                                                                                                                                                                                                                                                                                                                                                                                                                                                                                                                                                                                                                                                                                                                                                                                                                                                                                                                                                                                                                                                                                                                                                                                                                                                                 | Institut Pasteur Dakar                                                                                     | Institut Pasteur de Dakar                                                                                                                                                                                                                                                                                       | Ndongo Dia, Moussa Moise Diagne, Mamadou Diop, Ousmane Faye, Amadou Alpha Sall                                                                                                                                                                                                                                                                                                        |
| EPI_ISL_476516                                                                                                                                                                                                                                                                                                                                                                                                                                                                                                                                                                                                                                                                                                                                                                                                                                                                                                                                                                                                                                                                                                                                                                                                                                                                                                                                                                                                                                                                                                                                                                                                                                                                                                                                                                                                                                                                                                                                                                                                                                                                                                                                                                 | Institut Pasteur Dakar                                                                                     | Institut Pasteur de Dakar                                                                                                                                                                                                                                                                                       | Ndongo Dia, Moussa Moise Diagne, mamadou Diop, Ousmane Faye, Amadou Alpha Sall                                                                                                                                                                                                                                                                                                        |
| EPI_ISL_476558, EPI_ISL_476562                                                                                                                                                                                                                                                                                                                                                                                                                                                                                                                                                                                                                                                                                                                                                                                                                                                                                                                                                                                                                                                                                                                                                                                                                                                                                                                                                                                                                                                                                                                                                                                                                                                                                                                                                                                                                                                                                                                                                                                                                                                                                                                                                 | Institut Pasteur Dakar                                                                                     | Institut Pasteur de Dakar                                                                                                                                                                                                                                                                                       | Ndongo Dia, Moussa Moise Diagne, Mamadou Diop, Ousmane Faye, Amadou Alpha Sall                                                                                                                                                                                                                                                                                                        |
| EPI_ISL_476564                                                                                                                                                                                                                                                                                                                                                                                                                                                                                                                                                                                                                                                                                                                                                                                                                                                                                                                                                                                                                                                                                                                                                                                                                                                                                                                                                                                                                                                                                                                                                                                                                                                                                                                                                                                                                                                                                                                                                                                                                                                                                                                                                                 | Institut Pasteur Dakar                                                                                     | Institut Pasteur de Dakar                                                                                                                                                                                                                                                                                       | Ndongo Dia, Moussa Moise Diagne, Mamadou diop, Ousmane Faye, Amadou alpha Sall                                                                                                                                                                                                                                                                                                        |
| EPI_ISL_476569                                                                                                                                                                                                                                                                                                                                                                                                                                                                                                                                                                                                                                                                                                                                                                                                                                                                                                                                                                                                                                                                                                                                                                                                                                                                                                                                                                                                                                                                                                                                                                                                                                                                                                                                                                                                                                                                                                                                                                                                                                                                                                                                                                 | Institut Pasteur Dakar                                                                                     | Institut Pasteur de Dakar                                                                                                                                                                                                                                                                                       | Ndongo Dia, Moussa Moise, Mamadou Diop, Ousmane Faye, Amadou Alpha Sall                                                                                                                                                                                                                                                                                                               |
| EPI_ISL_476572, EPI_ISL_476574                                                                                                                                                                                                                                                                                                                                                                                                                                                                                                                                                                                                                                                                                                                                                                                                                                                                                                                                                                                                                                                                                                                                                                                                                                                                                                                                                                                                                                                                                                                                                                                                                                                                                                                                                                                                                                                                                                                                                                                                                                                                                                                                                 | Institut Pasteur Dakar                                                                                     | Institut Pasteur de Dakar                                                                                                                                                                                                                                                                                       | Ndongo Dia, Moussa Moise Diagne, Mamadou Diop, Ousmane Faye, Amadou Alpha Sall                                                                                                                                                                                                                                                                                                        |
| EPI_ISL_476702                                                                                                                                                                                                                                                                                                                                                                                                                                                                                                                                                                                                                                                                                                                                                                                                                                                                                                                                                                                                                                                                                                                                                                                                                                                                                                                                                                                                                                                                                                                                                                                                                                                                                                                                                                                                                                                                                                                                                                                                                                                                                                                                                                 | Incubadora Venezolana de Ciencia, Venezuela                                                                | Incubadora Venezolana de Ciencia, Venezuela / Instituto Nacional de Salud, Bogotá, Colombia / Grupo de Investigaciones Microbiológicas-UR (GIMUR), Departamento de Biología, Facultad de Ciencias Naturales, Universidad del Rosario, Bogotá, Colombia / Icahn School of Medicine at Mount Sinai, New York, USA | Alberto Paniz-Mondolfi, Marina Muñoz, Luis Perez-Garcia, Lourdes Delgado, Carolina Florez, Sergio Gomez, Angelica Rico, Lisseth Pardo, Esther C. Barros, Carolina Hernández, Jesús E. Jaimes, Anibal A. Teherán, Ana S. Gonzalez-Reiche, Matthew M. Hernandez, Emilia Mia Sordillo, Viviana Simon, Harm van Bakel, Juan David Ramirez                                                 |
| EPI_ISL_476704                                                                                                                                                                                                                                                                                                                                                                                                                                                                                                                                                                                                                                                                                                                                                                                                                                                                                                                                                                                                                                                                                                                                                                                                                                                                                                                                                                                                                                                                                                                                                                                                                                                                                                                                                                                                                                                                                                                                                                                                                                                                                                                                                                 | Incubadora Venezolana de Ciencia, Venezuela                                                                | Incubadora Venezolana de Ciencia, Venezuela / Instituto Nacional de Salud, Bogotá, Colombia / Grupo de Investigaciones Microbiológicas-UR (GIMUR), Departamento de Biología, Facultad de Ciencias Naturales, Universidad del Rosario, Bogotá, Colombia / Icahn School of Medicine at Mount Sinai, New York, USA | Alberto Paniz-Mondolfi, Marina Muñoz, Luis Perez-Garcia, Lourdes Delgado, Carolina Florez, Sergio Gomez, Angelica Rico, Lisseth Pardo, Esther C. Barros, Carolina Hernández, Jesús E. Jaimes, Anibal A. Teherán, Ana S. Gonzalez-Reiche, Matthew M. Hernandez, Emilia Mia Sordillo, Viviana Simon, Harm van Bakel, Juan David Ramirez                                                 |
| EPI_ISL_476801, EPI_ISL_476802, EPI_ISL_476803, EPI_ISL_476804                                                                                                                                                                                                                                                                                                                                                                                                                                                                                                                                                                                                                                                                                                                                                                                                                                                                                                                                                                                                                                                                                                                                                                                                                                                                                                                                                                                                                                                                                                                                                                                                                                                                                                                                                                                                                                                                                                                                                                                                                                                                                                                 | Hong Kong Department of Health                                                                             | School of Public Health, The University of Hong Kong                                                                                                                                                                                                                                                            | Dominic N.C. Tsang, Daniel K.W. Chu, Leo L.M. Poon, Malik Peiris                                                                                                                                                                                                                                                                                                                      |
| EPI_ISL_476814, EPI_ISL_476818, EPI_ISL_476819                                                                                                                                                                                                                                                                                                                                                                                                                                                                                                                                                                                                                                                                                                                                                                                                                                                                                                                                                                                                                                                                                                                                                                                                                                                                                                                                                                                                                                                                                                                                                                                                                                                                                                                                                                                                                                                                                                                                                                                                                                                                                                                                 | Department of Laboratory Medicine, Tan Tock Seng Hospital                                                  | Department of Laboratory Medicine, Tan Tock Seng Hospital                                                                                                                                                                                                                                                       | Chen YYC, Zair X, Li C, Tang WY, Maurer-Stroh S, Barkham TMS, Nagarajan N, Sessions OM                                                                                                                                                                                                                                                                                                |
| EPI_ISL_476832                                                                                                                                                                                                                                                                                                                                                                                                                                                                                                                                                                                                                                                                                                                                                                                                                                                                                                                                                                                                                                                                                                                                                                                                                                                                                                                                                                                                                                                                                                                                                                                                                                                                                                                                                                                                                                                                                                                                                                                                                                                                                                                                                                 | Medical Biology Department, Kocaeli University                                                             | Medical Genetics Department, Kocaeli University                                                                                                                                                                                                                                                                 | Savli H, Cine N, Sunnetci-Akkoyunlu D, Eren-Keskin S, Ilgazli A, Akhan S, Karadenizli A, Kasap M, Sayan M, Akpinar G, Canturk NZ                                                                                                                                                                                                                                                      |
| EPI_ISL_476840, EPI_ISL_476842, EPI_ISL_476844, EPI_ISL_476846, EPI_ISL_476848, EPI_ISL_476849, EPI_ISL_476850, EPI_ISL_476852, EPI_ISL_476853, EPI_ISL_476854                                                                                                                                                                                                                                                                                                                                                                                                                                                                                                                                                                                                                                                                                                                                                                                                                                                                                                                                                                                                                                                                                                                                                                                                                                                                                                                                                                                                                                                                                                                                                                                                                                                                                                                                                                                                                                                                                                                                                                                                                 | Defence Research & Development Establishment (DRDE)                                                        | Defence Research & Development Establishment (DRDE)                                                                                                                                                                                                                                                             | Shashi Sharma, Paban Kumar Dash, Sushil Kumar Sharma, Ambuj Shrivastava, Jyoti S. Kumar                                                                                                                                                                                                                                                                                               |
| EPI_ISL_476855                                                                                                                                                                                                                                                                                                                                                                                                                                                                                                                                                                                                                                                                                                                                                                                                                                                                                                                                                                                                                                                                                                                                                                                                                                                                                                                                                                                                                                                                                                                                                                                                                                                                                                                                                                                                                                                                                                                                                                                                                                                                                                                                                                 | GMERS Medical College & Hospital, Gotri, Vadodara                                                          | Gujarat Biotechnology Research Centre                                                                                                                                                                                                                                                                           | Apurvasinh Puvav, Janvi Raval, Zarna Patel, Monika Gandhi, Pinal Trivedi, Maharshi Pandya, Nidhi Patel, Nitin Savaliya, Raghawendra Kumar, Dinesh Kumar, Zuber Saiyed, Komal Patel, Labdhi Pandya, Afzal Ansari, Nikha Trivedi, Meenakshi Shah, Neena Doshi, Varsha Godbole, R D Dixit, A M Kadri, Harsh Bakshi, Chaitanya Joshi, Madhvi Joshi                                        |
| EPI_ISL_476856                                                                                                                                                                                                                                                                                                                                                                                                                                                                                                                                                                                                                                                                                                                                                                                                                                                                                                                                                                                                                                                                                                                                                                                                                                                                                                                                                                                                                                                                                                                                                                                                                                                                                                                                                                                                                                                                                                                                                                                                                                                                                                                                                                 | GMERS Medical College & Hospital, Gotri, Vadodara                                                          | Gujarat Biotechnology Research Centre                                                                                                                                                                                                                                                                           | Janvi Raval, Zarna Patel, Monika Gandhi, Pinal Trivedi, Maharshi Pandya, Nidhi Patel, Nitin Savaliya, Raghawendra Kumar, Dinesh Kumar, Zuber Saiyed, Komal Patel, Labdhi Pandya, Afzal Ansari, Nikha Trivedi, Meenakshi Shah, Neena Doshi, Varsha Godbole, Apurvasinh Puvav, R D Dixit, A M Kadri, Harsh Bakshi, Chaitanya Joshi, Madhvi Joshi                                        |
| EPI_ISL_476857                                                                                                                                                                                                                                                                                                                                                                                                                                                                                                                                                                                                                                                                                                                                                                                                                                                                                                                                                                                                                                                                                                                                                                                                                                                                                                                                                                                                                                                                                                                                                                                                                                                                                                                                                                                                                                                                                                                                                                                                                                                                                                                                                                 | GMERS Medical College & Hospital, Gotri, Vadodara                                                          | Gujarat Biotechnology Research Centre                                                                                                                                                                                                                                                                           | Zarna Patel, Monika Gandhi, Pinal Trivedi, Maharshi Pandya, Nidhi Patel, Nitin Savaliya, Raghawendra Kumar, Dinesh Kumar, Zuber Saiyed, Komal Patel, Labdhi Pandya, Afzal Ansari, Nikha Trivedi, Meenakshi Shah, Neena Doshi, Varsha Godbole, Apurvasinh Puvav, Janvi Raval, R D Dixit, A M Kadri, Harsh Bakshi, Chaitanya Joshi, Madhvi Joshi                                        |
| EPI_ISL_476858                                                                                                                                                                                                                                                                                                                                                                                                                                                                                                                                                                                                                                                                                                                                                                                                                                                                                                                                                                                                                                                                                                                                                                                                                                                                                                                                                                                                                                                                                                                                                                                                                                                                                                                                                                                                                                                                                                                                                                                                                                                                                                                                                                 | GMERS Medical College & Hospital, Gotri, Vadodara                                                          | Gujarat Biotechnology Research Centre                                                                                                                                                                                                                                                                           | Monika Gandhi, Pinal Trivedi, Maharshi Pandya, Nidhi Patel, Nitin Savaliya, Raghawendra Kumar, Dinesh Kumar, Zuber Saiyed, Komal Patel, Labdhi Pandya, Afzal Ansari, Nikha Trivedi, Meenakshi Shah, Neena Doshi, Varsha Godbole, Apurvasinh Puvav, Janvi Raval, Zarna Patel, R D Dixit, A M Kadri, Harsh Bakshi, Chaitanya Joshi, Madhvi Joshi                                        |
| EPI_ISL_476859                                                                                                                                                                                                                                                                                                                                                                                                                                                                                                                                                                                                                                                                                                                                                                                                                                                                                                                                                                                                                                                                                                                                                                                                                                                                                                                                                                                                                                                                                                                                                                                                                                                                                                                                                                                                                                                                                                                                                                                                                                                                                                                                                                 | GMERS Medical College & Hospital, Gotri, Vadodara                                                          | Gujarat Biotechnology Research Centre                                                                                                                                                                                                                                                                           | Pinal Trivedi, Maharshi Pandya, Nidhi Patel, Nitin Savaliya, Raghawendra Kumar, Dinesh Kumar, Zuber Saiyed, Komal Patel, Labdhi Pandya, Afzal Ansari, Nikha Trivedi, Meenakshi Shah, Neena Doshi, Varsha Godbole, Apurvasinh Puvav, Janvi Raval, Zarna Patel, Monika Gandhi, R D Dixit, A M Kadri, Harsh Bakshi, Chaitanya Joshi, Madhvi Joshi                                        |
| EPI_ISL_476860                                                                                                                                                                                                                                                                                                                                                                                                                                                                                                                                                                                                                                                                                                                                                                                                                                                                                                                                                                                                                                                                                                                                                                                                                                                                                                                                                                                                                                                                                                                                                                                                                                                                                                                                                                                                                                                                                                                                                                                                                                                                                                                                                                 | GMERS Medical College & Hospital, Gotri, Vadodara                                                          | Gujarat Biotechnology Research Centre                                                                                                                                                                                                                                                                           | Maharshi Pandya, Nidhi Patel, Nitin Savaliya, Raghawendra Kumar, Dinesh Kumar, Zuber Saiyed, Komal Patel, Labdhi Pandya, Afzal Ansari, Nikha Trivedi, Meenakshi Shah, Neena Doshi, Varsha Godbole, Apurvasinh Puvav, Janvi Raval, Zarna Patel, Monika Gandhi, Pinal Trivedi, R D Dixit, A M Kadri, Harsh Bakshi, Chaitanya Joshi, Madhvi Joshi                                        |
| EPI_ISL_476861                                                                                                                                                                                                                                                                                                                                                                                                                                                                                                                                                                                                                                                                                                                                                                                                                                                                                                                                                                                                                                                                                                                                                                                                                                                                                                                                                                                                                                                                                                                                                                                                                                                                                                                                                                                                                                                                                                                                                                                                                                                                                                                                                                 | GMERS Medical College & Hospital, Gotri, Vadodara                                                          | Gujarat Biotechnology Research Centre                                                                                                                                                                                                                                                                           | Nidhi Patel, Nitin Savaliya, Raghawendra Kumar, Dinesh Kumar, Zuber Saiyed, Komal Patel, Labdhi Pandya, Afzal Ansari, Nikha Trivedi, Meenakshi Shah, Neena Doshi, Varsha Godbole, Apurvasinh Puvav, Janvi Raval, Zarna Patel, Monika Gandhi, Pinal Trivedi, Maharshi Pandya, R D Dixit, A M Kadri, Harsh Bakshi, Chaitanya Joshi, Madhvi Joshi                                        |
| EPI_ISL_476862                                                                                                                                                                                                                                                                                                                                                                                                                                                                                                                                                                                                                                                                                                                                                                                                                                                                                                                                                                                                                                                                                                                                                                                                                                                                                                                                                                                                                                                                                                                                                                                                                                                                                                                                                                                                                                                                                                                                                                                                                                                                                                                                                                 | GMERS Medical College & Hospital, Gotri, Vadodara                                                          | Gujarat Biotechnology Research Centre                                                                                                                                                                                                                                                                           | Nitin Savaliya, Raghawendra Kumar, Dinesh Kumar, Zuber Saiyed, Komal Patel, Labdhi Pandya, Afzal Ansari, Nikha Trivedi, Meenakshi Shah, Neena Doshi, Varsha Godbole, Apurvasinh Puvav, Janvi Raval, Zarna Patel, Monika Gandhi, Pinal Trivedi, Maharshi Pandya, Nidhi Patel, R D Dixit, A M Kadri, Harsh Bakshi, Chaitanya Joshi, Madhvi Joshi                                        |
| EPI_ISL_476863                                                                                                                                                                                                                                                                                                                                                                                                                                                                                                                                                                                                                                                                                                                                                                                                                                                                                                                                                                                                                                                                                                                                                                                                                                                                                                                                                                                                                                                                                                                                                                                                                                                                                                                                                                                                                                                                                                                                                                                                                                                                                                                                                                 | GMERS Medical College and Hospital, Gandhinagar                                                            | Gujarat Biotechnology Research Centre                                                                                                                                                                                                                                                                           | Raghawendra Kumar, Dinesh Kumar, Zuber Saiyed, Komal Patel, Labdhi Pandya, Afzal Ansari, Nikha Trivedi, Seema Bhatt, Gaurishankar Shrimali, Bhavesh Modi, Bharti Rajani, Apurvasinh Puvav, Janvi Raval, Zarna Patel, Monika Gandhi, Pinal Trivedi, Maharshi Pandya, Nidhi Patel, Nitin Savaliya, Raghawendra Kumar, R D Dixit, A M Kadri, Harsh Bakshi, Chaitanya Joshi, Madhvi Joshi |
| EPI_ISL_476864                                                                                                                                                                                                                                                                                                                                                                                                                                                                                                                                                                                                                                                                                                                                                                                                                                                                                                                                                                                                                                                                                                                                                                                                                                                                                                                                                                                                                                                                                                                                                                                                                                                                                                                                                                                                                                                                                                                                                                                                                                                                                                                                                                 | GMERS Medical College and Hospital, Gandhinagar                                                            | Gujarat Biotechnology Research Centre                                                                                                                                                                                                                                                                           | Dinesh Kumar, Zuber Saiyed, Komal Patel, Labdhi Pandya, Afzal Ansari, Nikha Trivedi, Seema Bhatt, Gaurishankar Shrimali, Bhavesh Modi, Bharti Rajani, Apurvasinh Puvav, Janvi Raval, Zarna Patel, Monika Gandhi, Pinal Trivedi, Maharshi Pandya, Nidhi Patel, Nitin Savaliya, Raghawendra Kumar, R D Dixit, A M Kadri, Harsh Bakshi, Chaitanya Joshi, Madhvi Joshi                    |
| EPI_ISL_476865                                                                                                                                                                                                                                                                                                                                                                                                                                                                                                                                                                                                                                                                                                                                                                                                                                                                                                                                                                                                                                                                                                                                                                                                                                                                                                                                                                                                                                                                                                                                                                                                                                                                                                                                                                                                                                                                                                                                                                                                                                                                                                                                                                 | GMERS Medical College and Hospital, Gandhinagar                                                            | Gujarat Biotechnology Research Centre                                                                                                                                                                                                                                                                           | Zuber Saiyed, Komal Patel, Labdhi Pandya, Afzal Ansari, Nikha Trivedi, Seema Bhatt, Gaurishankar Shrimali, Bhavesh Modi, Bharti Rajani, Apurvasinh Puvav, Janvi Raval, Zarna Patel, Monika Gandhi, Pinal Trivedi, Maharshi Pandya, Nidhi Patel, Nitin Savaliya, Raghawendra Kumar, Dinesh Kumar, R D Dixit, A M Kadri, Harsh Bakshi, Chaitanya Joshi, Madhvi Joshi                    |
| EPI_ISL_476866                                                                                                                                                                                                                                                                                                                                                                                                                                                                                                                                                                                                                                                                                                                                                                                                                                                                                                                                                                                                                                                                                                                                                                                                                                                                                                                                                                                                                                                                                                                                                                                                                                                                                                                                                                                                                                                                                                                                                                                                                                                                                                                                                                 | GMERS Medical College and Hospital, Gandhinagar                                                            | Gujarat Biotechnology Research Centre                                                                                                                                                                                                                                                                           | Komal Patel, Labdhi Pandya, Afzal Ansari, Nikha Trivedi, Seema Bhatt, Gaurishankar Shrimali, Bhavesh Modi, Bharti Rajani, Apurvasinh Puvav, Janvi Raval, Zarna Patel, Monika Gandhi, Pinal Trivedi, Maharshi Pandya, Nidhi Patel, Nitin Savaliya, Raghawendra Kumar, Dinesh Kumar, Zuber Saiyed, R D Dixit, A M Kadri, Harsh Bakshi, Chaitanya Joshi, Madhvi Joshi                    |
| EPI_ISL_476867                                                                                                                                                                                                                                                                                                                                                                                                                                                                                                                                                                                                                                                                                                                                                                                                                                                                                                                                                                                                                                                                                                                                                                                                                                                                                                                                                                                                                                                                                                                                                                                                                                                                                                                                                                                                                                                                                                                                                                                                                                                                                                                                                                 | Banas Medical College and Research Institute                                                               | Gujarat Biotechnology Research Centre                                                                                                                                                                                                                                                                           | Labdhi Pandya, Afzal Ansari, Nikha Trivedi, Radhika Khara, Sunil R Joshi, Viren s Doshi, Apurvasinh Puvav, Janvi Raval, Zarna Patel, Monika Gandhi, Pinal Trivedi, Maharshi Pandya, Nidhi                                                                                                                                                                                             |

|                                                                                                                                                                                                                                                                                                                                                                                                                                                                                                                                                                                                                                                                                                                                                                |                                                                                                                                                                                                                |                                                                                                            |                                                                                                                                                                                                                                                                                                                                                                                                                                               |
|----------------------------------------------------------------------------------------------------------------------------------------------------------------------------------------------------------------------------------------------------------------------------------------------------------------------------------------------------------------------------------------------------------------------------------------------------------------------------------------------------------------------------------------------------------------------------------------------------------------------------------------------------------------------------------------------------------------------------------------------------------------|----------------------------------------------------------------------------------------------------------------------------------------------------------------------------------------------------------------|------------------------------------------------------------------------------------------------------------|-----------------------------------------------------------------------------------------------------------------------------------------------------------------------------------------------------------------------------------------------------------------------------------------------------------------------------------------------------------------------------------------------------------------------------------------------|
| EPI_ISL_476868                                                                                                                                                                                                                                                                                                                                                                                                                                                                                                                                                                                                                                                                                                                                                 | Banas Medical College and Research Institute                                                                                                                                                                   | Gujarat Biotechnology Research Centre                                                                      | Patel, Nitin Savaliya, Raghawendra Kumar, Dinesh Kumar, Zuber Saiyed, Komal Patel, R D Dixit, A M Kadri, Harsh Bakshi, Chaitanya Joshi, Madhvi Joshi                                                                                                                                                                                                                                                                                          |
| EPI_ISL_476869                                                                                                                                                                                                                                                                                                                                                                                                                                                                                                                                                                                                                                                                                                                                                 | Department of MicroBiology, Government Medical College, Surat                                                                                                                                                  | Gujarat Biotechnology Research Centre                                                                      | Azfal Ansari, Nikha Trivedi, Radhika Khara, Sunil R Joshi, Viren s Doshi, Apurvasinh Puvar, Janvi Raval, Zarna Patel, Monika Gandhi, Pinal Trivedi, Maharshi Pandya, Nidhi Patel, Nitin Savaliya, Raghawendra Kumar, Dinesh Kumar, Zuber Saiyed, Komal Patel, Labdhi Pandya, R D Dixit, A M Kadri, Harsh Bakshi, Chaitanya Joshi, Madhvi Joshi                                                                                                |
| EPI_ISL_476870                                                                                                                                                                                                                                                                                                                                                                                                                                                                                                                                                                                                                                                                                                                                                 | Department of MicroBiology, Government Medical College, Surat                                                                                                                                                  | Gujarat Biotechnology Research Centre                                                                      | Nikha Trivedi, Naresh Chauhan, Summaiya Mullan, Amit gamit, Apurvasinh Puvar, Janvi Raval, Zarna Patel, Monika Gandhi, Pinal Trivedi, Maharshi Pandya, Nidhi Patel, Nitin Savaliya, Raghawendra Kumar, Dinesh Kumar, Zuber Saiyed, Komal Patel, Labdhi Pandya, Azfal Ansari, R D Dixit, A M Kadri, Harsh Bakshi, Chaitanya Joshi, Madhvi Joshi                                                                                                |
| EPI_ISL_476871                                                                                                                                                                                                                                                                                                                                                                                                                                                                                                                                                                                                                                                                                                                                                 | Department of MicroBiology, Government Medical College, Surat                                                                                                                                                  | Gujarat Biotechnology Research Centre                                                                      | Naresh Chauhan, Summaiya Mullan, Amit gamit, Apurvasinh Puvar, Janvi Raval, Zarna Patel, Monika Gandhi, Pinal Trivedi, Maharshi Pandya, Nidhi Patel, Nitin Savaliya, Raghawendra Kumar, Dinesh Kumar, Zuber Saiyed, Komal Patel, Labdhi Pandya, Azfal Ansari, Nikha Trivedi, R D Dixit, A M Kadri, Harsh Bakshi, Chaitanya Joshi, Madhvi Joshi                                                                                                |
| EPI_ISL_476872                                                                                                                                                                                                                                                                                                                                                                                                                                                                                                                                                                                                                                                                                                                                                 | Department of MicroBiology, Government Medical College, Surat                                                                                                                                                  | Gujarat Biotechnology Research Centre                                                                      | Summaiya Mullan, Amit gamit, Apurvasinh Puvar, Janvi Raval, Zarna Patel, Monika Gandhi, Pinal Trivedi, Maharshi Pandya, Nidhi Patel, Nitin Savaliya, Raghawendra Kumar, Dinesh Kumar, Zuber Saiyed, Komal Patel, Labdhi Pandya, Azfal Ansari, Nikha Trivedi, Naresh Chauhan, R D Dixit, A M Kadri, Harsh Bakshi, Chaitanya Joshi, Madhvi Joshi                                                                                                |
| EPI_ISL_476873                                                                                                                                                                                                                                                                                                                                                                                                                                                                                                                                                                                                                                                                                                                                                 | Department of MicroBiology, Government Medical College, Surat                                                                                                                                                  | Gujarat Biotechnology Research Centre                                                                      | Amit gamit, Apurvasinh Puvar, Janvi Raval, Zarna Patel, Monika Gandhi, Pinal Trivedi, Maharshi Pandya, Nidhi Patel, Nitin Savaliya, Raghawendra Kumar, Dinesh Kumar, Zuber Saiyed, Komal Patel, Labdhi Pandya, Azfal Ansari, Nikha Trivedi, Naresh Chauhan, Summaiya Mullan, R D Dixit, A M Kadri, Harsh Bakshi, Chaitanya Joshi, Madhvi Joshi                                                                                                |
| EPI_ISL_476874                                                                                                                                                                                                                                                                                                                                                                                                                                                                                                                                                                                                                                                                                                                                                 | Department of MicroBiology, Government Medical College, Surat                                                                                                                                                  | Gujarat Biotechnology Research Centre                                                                      | Apurvasinh Puvar, Janvi Raval, Zarna Patel, Monika Gandhi, Pinal Trivedi, Maharshi Pandya, Nidhi Patel, Nitin Savaliya, Raghawendra Kumar, Dinesh Kumar, Zuber Saiyed, Komal Patel, Labdhi Pandya, Azfal Ansari, Nikha Trivedi, Naresh Chauhan, Summaiya Mullan, Amit gamit, R D Dixit, A M Kadri, Harsh Bakshi, Chaitanya Joshi, Madhvi Joshi                                                                                                |
| EPI_ISL_476875                                                                                                                                                                                                                                                                                                                                                                                                                                                                                                                                                                                                                                                                                                                                                 | Department of MicroBiology, Government Medical College, Surat                                                                                                                                                  | Gujarat Biotechnology Research Centre                                                                      | Janvi Raval, Zarna Patel, Monika Gandhi, Pinal Trivedi, Maharshi Pandya, Nidhi Patel, Nitin Savaliya, Raghawendra Kumar, Dinesh Kumar, Zuber Saiyed, Komal Patel, Labdhi Pandya, Azfal Ansari, Nikha Trivedi, Naresh Chauhan, Summaiya Mullan, Amit gamit, Apurvasinh Puvar, R D Dixit, A M Kadri, Harsh Bakshi, Chaitanya Joshi, Madhvi Joshi                                                                                                |
| EPI_ISL_476876                                                                                                                                                                                                                                                                                                                                                                                                                                                                                                                                                                                                                                                                                                                                                 | Department of MicroBiology, Government Medical College, Surat                                                                                                                                                  | Gujarat Biotechnology Research Centre                                                                      | Zarna Patel, Monika Gandhi, Pinal Trivedi, Maharshi Pandya, Nidhi Patel, Nitin Savaliya, Raghawendra Kumar, Dinesh Kumar, Zuber Saiyed, Komal Patel, Labdhi Pandya, Azfal Ansari, Nikha Trivedi, Naresh Chauhan, Summaiya Mullan, Amit gamit, Apurvasinh Puvar, Janvi Raval, R D Dixit, A M Kadri, Harsh Bakshi, Chaitanya Joshi, Madhvi Joshi                                                                                                |
| EPI_ISL_476877                                                                                                                                                                                                                                                                                                                                                                                                                                                                                                                                                                                                                                                                                                                                                 | Department of MicroBiology, Government Medical College, Surat                                                                                                                                                  | Gujarat Biotechnology Research Centre                                                                      | Pinal Trivedi, Maharshi Pandya, Nidhi Patel, Nitin Savaliya, Raghawendra Kumar, Dinesh Kumar, Zuber Saiyed, Komal Patel, Labdhi Pandya, Azfal Ansari, Nikha Trivedi, Naresh Chauhan, Summaiya Mullan, Amit gamit, Apurvasinh Puvar, Janvi Raval, Zarna Patel, Monika Gandhi, Pinal Trivedi, Maharshi Pandya, R D Dixit, A M Kadri, Harsh Bakshi, Chaitanya Joshi, Madhvi Joshi                                                                |
| EPI_ISL_476878                                                                                                                                                                                                                                                                                                                                                                                                                                                                                                                                                                                                                                                                                                                                                 | Department of MicroBiology, Government Medical College, Surat                                                                                                                                                  | Gujarat Biotechnology Research Centre                                                                      | Maharshi Pandya, Nidhi Patel, Nitin Savaliya, Raghawendra Kumar, Dinesh Kumar, Zuber Saiyed, Komal Patel, Labdhi Pandya, Azfal Ansari, Nikha Trivedi, Naresh Chauhan, Summaiya Mullan, Amit gamit, Apurvasinh Puvar, Janvi Raval, Zarna Patel, Monika Gandhi, Pinal Trivedi, Maharshi Pandya, R D Dixit, A M Kadri, Harsh Bakshi, Chaitanya Joshi, Madhvi Joshi                                                                               |
| EPI_ISL_476879                                                                                                                                                                                                                                                                                                                                                                                                                                                                                                                                                                                                                                                                                                                                                 | Department of MicroBiology, Government Medical College, Surat                                                                                                                                                  | Gujarat Biotechnology Research Centre                                                                      | Nidhi Patel, Nitin Savaliya, Raghawendra Kumar, Dinesh Kumar, Zuber Saiyed, Komal Patel, Labdhi Pandya, Azfal Ansari, Nikha Trivedi, Naresh Chauhan, Summaiya Mullan, Amit gamit, Apurvasinh Puvar, Janvi Raval, Zarna Patel, Monika Gandhi, Pinal Trivedi, Maharshi Pandya, R D Dixit, A M Kadri, Harsh Bakshi, Chaitanya Joshi, Madhvi Joshi                                                                                                |
| EPI_ISL_476880                                                                                                                                                                                                                                                                                                                                                                                                                                                                                                                                                                                                                                                                                                                                                 | Department of MicroBiology, Government Medical College, Surat                                                                                                                                                  | Gujarat Biotechnology Research Centre                                                                      | Nitin Savaliya, Raghawendra Kumar, Dinesh Kumar, Zuber Saiyed, Komal Patel, Labdhi Pandya, Azfal Ansari, Nikha Trivedi, Naresh Chauhan, Summaiya Mullan, Amit gamit, Apurvasinh Puvar, Janvi Raval, Zarna Patel, Monika Gandhi, Pinal Trivedi, Maharshi Pandya, Nidhi Patel, Nitin Savaliya, Raghawendra Kumar, R D Dixit, A M Kadri, Harsh Bakshi, Chaitanya Joshi, Madhvi Joshi                                                             |
| EPI_ISL_476881                                                                                                                                                                                                                                                                                                                                                                                                                                                                                                                                                                                                                                                                                                                                                 | Department of MicroBiology, Government Medical College, Surat                                                                                                                                                  | Gujarat Biotechnology Research Centre                                                                      | Raghawendra Kumar, Dinesh Kumar, Zuber Saiyed, Komal Patel, Labdhi Pandya, Azfal Ansari, Nikha Trivedi, Naresh Chauhan, Summaiya Mullan, Amit gamit, Apurvasinh Puvar, Janvi Raval, Zarna Patel, Monika Gandhi, Pinal Trivedi, Maharshi Pandya, Nidhi Patel, Nitin Savaliya, Raghawendra Kumar, R D Dixit, A M Kadri, Harsh Bakshi, Chaitanya Joshi, Madhvi Joshi                                                                             |
| EPI_ISL_476882                                                                                                                                                                                                                                                                                                                                                                                                                                                                                                                                                                                                                                                                                                                                                 | Department of MicroBiology, Government Medical College, Surat                                                                                                                                                  | Gujarat Biotechnology Research Centre                                                                      | Dinesh Kumar, Zuber Saiyed, Komal Patel, Labdhi Pandya, Azfal Ansari, Nikha Trivedi, Naresh Chauhan, Summaiya Mullan, Amit gamit, Apurvasinh Puvar, Janvi Raval, Zarna Patel, Monika Gandhi, Pinal Trivedi, Maharshi Pandya, Nidhi Patel, Nitin Savaliya, Raghawendra Kumar, R D Dixit, A M Kadri, Harsh Bakshi, Chaitanya Joshi, Madhvi Joshi                                                                                                |
| EPI_ISL_476883, EPI_ISL_476884, EPI_ISL_476885, EPI_ISL_476886, EPI_ISL_476887, EPI_ISL_476888, EPI_ISL_476889, EPI_ISL_476890, EPI_ISL_476891, EPI_ISL_476892, EPI_ISL_476893, EPI_ISL_476894, EPI_ISL_476895, EPI_ISL_476896                                                                                                                                                                                                                                                                                                                                                                                                                                                                                                                                 | see above                                                                                                                                                                                                      | Defence Research & Development Establishment (DRDE)                                                        | Shashi Sharma, Paban Kumar Dash, Sushil Kumar Sharma, Ambuj Shrivastava, Jyoti S. Kumar                                                                                                                                                                                                                                                                                                                                                       |
| EPI_ISL_477015                                                                                                                                                                                                                                                                                                                                                                                                                                                                                                                                                                                                                                                                                                                                                 | Institute of Microbiology, Universidad San Francisco de Quito                                                                                                                                                  | Institute of Microbiology, Universidad San Francisco de Quito                                              | Sully Márquez, Belén Prado-Vivar, Juan José Guadalupe, Monica Becerra-Wong, Carla Torres, Bernardo Gutiérrez, Jorge Luis Velez, Verónica Barragán, Patricio Rojas-Silva, Gabriel Trueba, Michelle Grunauer, Paúl Cárdenas                                                                                                                                                                                                                     |
| EPI_ISL_477016                                                                                                                                                                                                                                                                                                                                                                                                                                                                                                                                                                                                                                                                                                                                                 | Institute of Microbiology, Universidad San Francisco de Quito                                                                                                                                                  | Institute of Microbiology, Universidad San Francisco de Quito                                              | Juan José Guadalupe, Sully Márquez, Belén Prado-Vivar, Monica Becerra-Wong, Carla Torres, Bernardo Gutiérrez, Jorge Luis Velez, Verónica Barragán, Patricio Rojas-Silva, Gabriel Trueba, Michelle Grunauer, Paúl Cárdenas                                                                                                                                                                                                                     |
| EPI_ISL_477143, EPI_ISL_477150, EPI_ISL_477155, EPI_ISL_477156                                                                                                                                                                                                                                                                                                                                                                                                                                                                                                                                                                                                                                                                                                 | Institut Pasteur Dakar                                                                                                                                                                                         | Institut Pasteur de Dakar                                                                                  | Ndongo Dia, Moussa Moise Diagne, Mamadou Diop, Mamadou Malado Jallow, Marie Henriette Dior Ndione, Safietou Sankhe, Ousmane Faye, Amadou Alpha Sall.                                                                                                                                                                                                                                                                                          |
| EPI_ISL_477163                                                                                                                                                                                                                                                                                                                                                                                                                                                                                                                                                                                                                                                                                                                                                 | Laboratory of Dr. John Lednický                                                                                                                                                                                | University of Florida                                                                                      | John A. Lednický, Maha A. Elbadry, Kuttichantran Subramaniam, Thomas B. Waltzek, John Glenn Morris, Jr.                                                                                                                                                                                                                                                                                                                                       |
| EPI_ISL_477170                                                                                                                                                                                                                                                                                                                                                                                                                                                                                                                                                                                                                                                                                                                                                 | Department of Laboratory, Medicine Tan Tock Seng Hospital                                                                                                                                                      | Department of Laboratory Medicine Tan Tock Seng Hospital                                                   | Chen YYC, Zair X, Li C, Tang WY, Maurer-Stroh S, Barkham TMS, Nagarajan N, Sessions OM                                                                                                                                                                                                                                                                                                                                                        |
| EPI_ISL_477171                                                                                                                                                                                                                                                                                                                                                                                                                                                                                                                                                                                                                                                                                                                                                 | Department of Laboratory, Medicine Tan Tock Seng Hospital                                                                                                                                                      | Department of Laboratory, Medicine Tan Tock Seng Hospital                                                  | Chen YYC, Zair X, Li C, Tang WY, Maurer-Stroh S, Barkham TMS, Nagarajan N, Sessions OM                                                                                                                                                                                                                                                                                                                                                        |
| EPI_ISL_477172, EPI_ISL_477174, EPI_ISL_477175, EPI_ISL_477177, EPI_ISL_477178, EPI_ISL_477180, EPI_ISL_477182                                                                                                                                                                                                                                                                                                                                                                                                                                                                                                                                                                                                                                                 | Department of Laboratory Medicine Tan Tock Seng Hospital                                                                                                                                                       | Department of Laboratory Medicine Tan Tock Seng Hospital                                                   | Chen YYC, Zair X, Li C, Tang WY, Maurer-Stroh S, Barkham TMS, Nagarajan N, Sessions OM                                                                                                                                                                                                                                                                                                                                                        |
| EPI_ISL_477183                                                                                                                                                                                                                                                                                                                                                                                                                                                                                                                                                                                                                                                                                                                                                 | Department of MicroBiology, Government Medical College, Surat                                                                                                                                                  | Gujarat Biotechnology Research Centre                                                                      | Monika Gandhi, Pinal Trivedi, Maharshi Pandya, Nidhi Patel, Nitin Savaliya, Raghawendra Kumar, Dinesh Kumar, Zuber Saiyed, Komal Patel, Labdhi Pandya, Azfal Ansari, Nikha Trivedi, Naresh Chauhan, Summaiya Mullan, Amit gamit, Apurvasinh Puvar, Janvi Raval, Zarna Patel, Monika Gandhi, Pinal Trivedi, Maharshi Pandya, Nidhi Patel, Nitin Savaliya, Raghawendra Kumar, R D Dixit, A M Kadri, Harsh Bakshi, Chaitanya Joshi, Madhvi Joshi |
| EPI_ISL_477184, EPI_ISL_477187, EPI_ISL_477188, EPI_ISL_477189, EPI_ISL_477190, EPI_ISL_477191, EPI_ISL_477192                                                                                                                                                                                                                                                                                                                                                                                                                                                                                                                                                                                                                                                 | Department of Laboratory Medicine Tan Tock Seng Hospital                                                                                                                                                       | Department of Laboratory Medicine Tan Tock Seng Hospital                                                   | Chen YYC, Zair X, Li C, Tang WY, Maurer-Stroh S, Barkham TMS, Nagarajan N, Sessions OM                                                                                                                                                                                                                                                                                                                                                        |
| EPI_ISL_477193                                                                                                                                                                                                                                                                                                                                                                                                                                                                                                                                                                                                                                                                                                                                                 | Istituto Zooprofilattico Sperimentale Puglia e Basilicata;                                                                                                                                                     | Beaconlab (Bioinformatics, Evolution and Comparative Genomics lab), Dept of Biosciences, University of Mla | Parisi A.,Pesole G., Manzari C., Chiara M.                                                                                                                                                                                                                                                                                                                                                                                                    |
| EPI_ISL_479482, EPI_ISL_479483, EPI_ISL_479484, EPI_ISL_479485, EPI_ISL_479486, EPI_ISL_479487, EPI_ISL_479488, EPI_ISL_479489, EPI_ISL_479490, EPI_ISL_479491, EPI_ISL_479492                                                                                                                                                                                                                                                                                                                                                                                                                                                                                                                                                                                 | see above                                                                                                                                                                                                      | Department of Laboratory Medicine Tan Tock Seng Hospital                                                   | Chen YYC, Zair X, Li C, Tang WY, Maurer-Stroh S, Barkham TMS, Nagarajan N, Sessions OM                                                                                                                                                                                                                                                                                                                                                        |
| EPI_ISL_479493, EPI_ISL_479495, EPI_ISL_479498, EPI_ISL_479499, EPI_ISL_479501, EPI_ISL_479502, EPI_ISL_479505, EPI_ISL_479507, EPI_ISL_479509, EPI_ISL_479510, EPI_ISL_479512, EPI_ISL_479513, EPI_ISL_479514, EPI_ISL_479516, EPI_ISL_479517, EPI_ISL_479519, EPI_ISL_479520, EPI_ISL_479521, EPI_ISL_479522, EPI_ISL_479523, EPI_ISL_479526, EPI_ISL_479527, EPI_ISL_479528, EPI_ISL_479529, EPI_ISL_479530, EPI_ISL_479531, EPI_ISL_479532, EPI_ISL_479533, EPI_ISL_479534, EPI_ISL_479535, EPI_ISL_479536, EPI_ISL_479537, EPI_ISL_479538, EPI_ISL_479539, EPI_ISL_479540, EPI_ISL_479541, EPI_ISL_479543, EPI_ISL_479544, EPI_ISL_479546, EPI_ISL_479547, EPI_ISL_479548, EPI_ISL_479550, EPI_ISL_479551, EPI_ISL_479552, EPI_ISL_479553, EPI_ISL_479572 | see above                                                                                                                                                                                                      | NIV Influenza                                                                                              | Potdar V                                                                                                                                                                                                                                                                                                                                                                                                                                      |
| EPI_ISL_479616, EPI_ISL_479617                                                                                                                                                                                                                                                                                                                                                                                                                                                                                                                                                                                                                                                                                                                                 | Laboratory of Molecular Virology of the International Centre for Genetic Engineering and Biotechnology (ICGEB)                                                                                                 | ARGO Open Lab Platform for Genome Sequencing                                                               | Licastro, D, Rajasekharan S, Dal Monego S, Segat L, D'Agaro P, Salton F, Confalonieri P, Confalonieri M, Marcello A                                                                                                                                                                                                                                                                                                                           |
| EPI_ISL_479618                                                                                                                                                                                                                                                                                                                                                                                                                                                                                                                                                                                                                                                                                                                                                 | Laboratory of Molecular Virology of the International Centre for Genetic Engineering and Biotechnology (ICGEB)                                                                                                 | ARGO Open Lab Platform for Genome Sequencing                                                               | Licastro, D, Rajasekharan S, Dal Monego S, Segat L, D'Agaro P, Salton F, Confalonieri P, Confalonieri M, Marcello A                                                                                                                                                                                                                                                                                                                           |
| EPI_ISL_479619                                                                                                                                                                                                                                                                                                                                                                                                                                                                                                                                                                                                                                                                                                                                                 | Laboratory of Molecular Virology of the International Centre for Genetic Engineering and Biotechnology (ICGEB)                                                                                                 | ARGO Open Lab Platform for Genome Sequencing                                                               | Licastro, D, Rajasekharan S, Dal Monego S, Segat L, D'Agaro P, Salton F, Confalonieri P, Confalonieri M, Marcello A                                                                                                                                                                                                                                                                                                                           |
| EPI_ISL_479620, EPI_ISL_479621, EPI_ISL_479622, EPI_ISL_479623, EPI_ISL_479624                                                                                                                                                                                                                                                                                                                                                                                                                                                                                                                                                                                                                                                                                 | Molecular diagnostic laboratory of Federal Budget Institution of Science "Central Research Institute of Epidemiology" of The Federal Service on Customers' Rights Protection and Human Well-being Surveillance | Group of Genomics and Postgenomic Technologies of Central Research Institute of Epidemiology               | Speranskaya AS, Kapteleva VV, Valodkhina AV, Bulanenko VP, Samoilov AE, Korneenko EV, Sizova TV, Tivanova EV, Shipulina OY, Akimkin VG                                                                                                                                                                                                                                                                                                        |
| EPI_ISL_479657                                                                                                                                                                                                                                                                                                                                                                                                                                                                                                                                                                                                                                                                                                                                                 | NIV Influenza                                                                                                                                                                                                  | NIV Influenza                                                                                              | Potdar V                                                                                                                                                                                                                                                                                                                                                                                                                                      |
| EPI_ISL_479756, EPI_ISL_479757, EPI_ISL_479758                                                                                                                                                                                                                                                                                                                                                                                                                                                                                                                                                                                                                                                                                                                 | National Institute of Hygiene and Epidemiology (NIHE)                                                                                                                                                          | National Key Laboratory of Gene Technology, Institute of Biotechnology (IBT)                               | Le Tung Lam, Nguyen Hong Trang, Ho Thi Thuong, Tran Huyen Linh, Ung Thi Hong Trang, Le Thi Thanh, Nguyen Vu Son, Vuong Duc Cuong, Tran Thu Huong, Pham Thi Hien, Nguyen Phuong Anh, Nguyen Le Khanh Hang, Hoang Vu Mai Phuong, Hoang Ha, Taichiro Takemura, Futoshi Hasebe, Chu Hoang Ha, Le Quynh Mai, Dang Duc Anh, Truong Nam Hai                                                                                                          |
| EPI_ISL_479790                                                                                                                                                                                                                                                                                                                                                                                                                                                                                                                                                                                                                                                                                                                                                 | Laboratory of Molecular Virology of the International Centre for Genetic Engineering and Biotechnology (ICGEB)                                                                                                 | ARGO Open Lab Platform for Genome Sequencing                                                               | Licastro, D, Rajasekharan S, Dal Monego S, Segat L, D'Agaro P, Salton F, Confalonieri P, Confalonieri M, Marcello A                                                                                                                                                                                                                                                                                                                           |
| EPI_ISL_479791                                                                                                                                                                                                                                                                                                                                                                                                                                                                                                                                                                                                                                                                                                                                                 | Laboratory of Molecular Virology of the International Centre for Genetic Engineering and Biotechnology (ICGEB)                                                                                                 | ARGO Open Lab Platform for Genome Sequencing                                                               | Licastro, D, Rajasekharan S, Dal Monego S, Segat L, D'Agaro P, Salton F, Confalonieri P, Confalonieri M, Marcello A                                                                                                                                                                                                                                                                                                                           |
| EPI_ISL_479792, EPI_ISL_479793, EPI_ISL_479794, EPI_ISL_479795                                                                                                                                                                                                                                                                                                                                                                                                                                                                                                                                                                                                                                                                                                 | Hokkaido Institute of Public Health                                                                                                                                                                            | Pathogen Genomics Center, National Institute of Infectious Diseases                                        | Tsuyoshi Sekizuka, Rika Komagome, Kentaro Itokawa, Rina Tanaka, Masanori Hashino, Hajime Kamiya, Motoi Suzuki, Makoto Kuroda                                                                                                                                                                                                                                                                                                                  |
| EPI_ISL_479796                                                                                                                                                                                                                                                                                                                                                                                                                                                                                                                                                                                                                                                                                                                                                 | Ishikawa Prefectural Institute of Public Health and Environmental Science                                                                                                                                      | Pathogen Genomics Center, National Institute of Infectious Diseases                                        | Tsuyoshi Sekizuka, Sanae Kuramoto, Eri Nariai, Kentaro Itokawa, Rina Tanaka, Masanori Hashino, Hajime Kamiya, Motoi Suzuki, Makoto Kuroda                                                                                                                                                                                                                                                                                                     |
| EPI_ISL_479797, EPI_ISL_479798                                                                                                                                                                                                                                                                                                                                                                                                                                                                                                                                                                                                                                                                                                                                 | Sagamihara City Public Health Research Institute                                                                                                                                                               | Pathogen Genomics Center, National Institute of Infectious Diseases                                        | Tsuyoshi Sekizuka, Hiroshi Nakamura, Kentaro Itokawa, Rina Tanaka, Masanori Hashino, Hajime Kamiya, Motoi Suzuki, Makoto Kuroda                                                                                                                                                                                                                                                                                                               |
| EPI_ISL_479799, EPI_ISL_479800                                                                                                                                                                                                                                                                                                                                                                                                                                                                                                                                                                                                                                                                                                                                 | Sapporo City Public Health Research Institute                                                                                                                                                                  | Pathogen Genomics Center, National Institute of Infectious Diseases                                        | Tsuyoshi Sekizuka, Asami Ohnishi, Kentaro Itokawa, Rina Tanaka, Masanori Hashino, Hajime Kamiya, Motoi Suzuki, Makoto Kuroda                                                                                                                                                                                                                                                                                                                  |
| EPI_ISL_479801                                                                                                                                                                                                                                                                                                                                                                                                                                                                                                                                                                                                                                                                                                                                                 | Hokkaido Institute of Public Health                                                                                                                                                                            | Pathogen Genomics Center, National Institute of Infectious Diseases                                        | Tsuyoshi Sekizuka, Rika Komagome, Kentaro Itokawa, Rina Tanaka, Masanori Hashino, Hajime Kamiya, Motoi Suzuki, Makoto Kuroda                                                                                                                                                                                                                                                                                                                  |
| EPI_ISL_479802, EPI_ISL_479803, EPI_ISL_479804                                                                                                                                                                                                                                                                                                                                                                                                                                                                                                                                                                                                                                                                                                                 | Sagamihara City Public Health Research Institute                                                                                                                                                               | Pathogen Genomics Center, National Institute of Infectious Diseases                                        | Tsuyoshi Sekizuka, Hiroshi Nakamura, Kentaro Itokawa, Rina Tanaka, Masanori Hashino, Hajime Kamiya, Motoi Suzuki, Makoto Kuroda                                                                                                                                                                                                                                                                                                               |
| EPI_ISL_479805, EPI_ISL_479806, EPI_ISL_479807, EPI_ISL_479808                                                                                                                                                                                                                                                                                                                                                                                                                                                                                                                                                                                                                                                                                                 | Saitama Prefectural Institute of Public Health                                                                                                                                                                 | Pathogen Genomics Center, National Institute of Infectious Diseases                                        | Tsuyoshi Sekizuka, Hayato Ehara, Kentaro Itokawa, Rina Tanaka, Masanori Hashino, Hajime Kamiya, Motoi Suzuki, Makoto Kuroda                                                                                                                                                                                                                                                                                                                   |



|                                                                                                                                                                                                                                                                                                                                                                                                                                                                                                                                                                                                                                                                                                                                                                                                                                                                                                                                |           |                                                                                                              |                                                                                                                                                                                         |
|--------------------------------------------------------------------------------------------------------------------------------------------------------------------------------------------------------------------------------------------------------------------------------------------------------------------------------------------------------------------------------------------------------------------------------------------------------------------------------------------------------------------------------------------------------------------------------------------------------------------------------------------------------------------------------------------------------------------------------------------------------------------------------------------------------------------------------------------------------------------------------------------------------------------------------|-----------|--------------------------------------------------------------------------------------------------------------|-----------------------------------------------------------------------------------------------------------------------------------------------------------------------------------------|
| EPI_ISL_480025, EPI_ISL_480026, EPI_ISL_480027, EPI_ISL_480028, EPI_ISL_480029                                                                                                                                                                                                                                                                                                                                                                                                                                                                                                                                                                                                                                                                                                                                                                                                                                                 |           |                                                                                                              |                                                                                                                                                                                         |
| EPI_ISL_480030, EPI_ISL_480031, EPI_ISL_480032, EPI_ISL_480033, EPI_ISL_480034, EPI_ISL_480035, EPI_ISL_480036, EPI_ISL_480037, EPI_ISL_480038, EPI_ISL_480039, EPI_ISL_480040, EPI_ISL_480041                                                                                                                                                                                                                                                                                                                                                                                                                                                                                                                                                                                                                                                                                                                                 | see above | Tochigi Prefectural Institute of Public Health and Environmental Science                                     | Pathogen Genomics Center, National Institute of Infectious Diseases                                                                                                                     |
| EPI_ISL_480042, EPI_ISL_480043, EPI_ISL_480044, EPI_ISL_480045, EPI_ISL_480046, EPI_ISL_480047, EPI_ISL_480048, EPI_ISL_480049, EPI_ISL_480050, EPI_ISL_480051, EPI_ISL_480052, EPI_ISL_480053, EPI_ISL_480054, EPI_ISL_480055, EPI_ISL_480056, EPI_ISL_480057, EPI_ISL_480058, EPI_ISL_480059, EPI_ISL_480060, EPI_ISL_480061, EPI_ISL_480062, EPI_ISL_480063, EPI_ISL_480064                                                                                                                                                                                                                                                                                                                                                                                                                                                                                                                                                 | see above | Nagoya City Public Health Research Institute                                                                 | Pathogen Genomics Center, National Institute of Infectious Diseases                                                                                                                     |
| EPI_ISL_480065, EPI_ISL_480066, EPI_ISL_480067, EPI_ISL_480068, EPI_ISL_480069, EPI_ISL_480070, EPI_ISL_480071, EPI_ISL_480072                                                                                                                                                                                                                                                                                                                                                                                                                                                                                                                                                                                                                                                                                                                                                                                                 |           | Sakai City Institute of Public Health                                                                        | Pathogen Genomics Center, National Institute of Infectious Diseases                                                                                                                     |
| EPI_ISL_480073                                                                                                                                                                                                                                                                                                                                                                                                                                                                                                                                                                                                                                                                                                                                                                                                                                                                                                                 |           | Tochigi Prefectural Institute of Public Health and Environmental Science                                     | Pathogen Genomics Center, National Institute of Infectious Diseases                                                                                                                     |
| EPI_ISL_480074, EPI_ISL_480075, EPI_ISL_480076, EPI_ISL_480077, EPI_ISL_480078, EPI_ISL_480079, EPI_ISL_480080, EPI_ISL_480081, EPI_ISL_480082                                                                                                                                                                                                                                                                                                                                                                                                                                                                                                                                                                                                                                                                                                                                                                                 |           | Shizuoka City Institute of Environmental Sciences and Public Health                                          | Pathogen Genomics Center, National Institute of Infectious Diseases                                                                                                                     |
| EPI_ISL_480083, EPI_ISL_480084, EPI_ISL_480085, EPI_ISL_480086, EPI_ISL_480087, EPI_ISL_480088, EPI_ISL_480089                                                                                                                                                                                                                                                                                                                                                                                                                                                                                                                                                                                                                                                                                                                                                                                                                 |           | Gifu Prefectural Institute of Public Health and Environmental Sciences                                       | Pathogen Genomics Center, National Institute of Infectious Diseases                                                                                                                     |
| EPI_ISL_480090, EPI_ISL_480091, EPI_ISL_480092, EPI_ISL_480093, EPI_ISL_480094, EPI_ISL_480095, EPI_ISL_480097, EPI_ISL_480098, EPI_ISL_480099, EPI_ISL_480100, EPI_ISL_480101, EPI_ISL_480102                                                                                                                                                                                                                                                                                                                                                                                                                                                                                                                                                                                                                                                                                                                                 | see above | Department of Infectious Diseases, Kobe Institute of Health                                                  | Pathogen Genomics Center, National Institute of Infectious Diseases                                                                                                                     |
| EPI_ISL_480103, EPI_ISL_480104, EPI_ISL_480105, EPI_ISL_480106, EPI_ISL_480107, EPI_ISL_480108                                                                                                                                                                                                                                                                                                                                                                                                                                                                                                                                                                                                                                                                                                                                                                                                                                 |           | Koshigaya City Public Health Center                                                                          | Pathogen Genomics Center, National Institute of Infectious Diseases                                                                                                                     |
| EPI_ISL_480109, EPI_ISL_480110, EPI_ISL_480111, EPI_ISL_480112, EPI_ISL_480113, EPI_ISL_480114, EPI_ISL_480115, EPI_ISL_480116, EPI_ISL_480117, EPI_ISL_480118, EPI_ISL_480119                                                                                                                                                                                                                                                                                                                                                                                                                                                                                                                                                                                                                                                                                                                                                 | see above | Oita Prefectural Institute of Public Health and Environmental Science                                        | Pathogen Genomics Center, National Institute of Infectious Diseases                                                                                                                     |
| EPI_ISL_480120, EPI_ISL_480121, EPI_ISL_480122, EPI_ISL_480123, EPI_ISL_480124, EPI_ISL_480125, EPI_ISL_480126, EPI_ISL_480127, EPI_ISL_480128, EPI_ISL_480129, EPI_ISL_480130, EPI_ISL_480131, EPI_ISL_480132, EPI_ISL_480133, EPI_ISL_480134, EPI_ISL_480135, EPI_ISL_480136, EPI_ISL_480138, EPI_ISL_480139, EPI_ISL_480140, EPI_ISL_480141, EPI_ISL_480142, EPI_ISL_480143, EPI_ISL_480144, EPI_ISL_480145, EPI_ISL_480146, EPI_ISL_480147, EPI_ISL_480148, EPI_ISL_480149, EPI_ISL_480150, EPI_ISL_480151, EPI_ISL_480152, EPI_ISL_480153, EPI_ISL_480154, EPI_ISL_480155, EPI_ISL_480156, EPI_ISL_480157, EPI_ISL_480158, EPI_ISL_480159, EPI_ISL_480160, EPI_ISL_480161, EPI_ISL_480162, EPI_ISL_480163, EPI_ISL_480164, EPI_ISL_480165, EPI_ISL_480166, EPI_ISL_480167, EPI_ISL_480168                                                                                                                                 | see above | Fukui Prefectural Institute of Public Health and Environmental Science                                       | Pathogen Genomics Center, National Institute of Infectious Diseases                                                                                                                     |
| EPI_ISL_480169, EPI_ISL_480170, EPI_ISL_480171, EPI_ISL_480172, EPI_ISL_480173, EPI_ISL_480174, EPI_ISL_480175, EPI_ISL_480176, EPI_ISL_480177                                                                                                                                                                                                                                                                                                                                                                                                                                                                                                                                                                                                                                                                                                                                                                                 |           | Gunma Prefectural Institute of Public Health and Environmental Sciences                                      | Pathogen Genomics Center, National Institute of Infectious Diseases                                                                                                                     |
| EPI_ISL_480178, EPI_ISL_480179                                                                                                                                                                                                                                                                                                                                                                                                                                                                                                                                                                                                                                                                                                                                                                                                                                                                                                 |           | Hiroshima City Institute of Public Health                                                                    | Pathogen Genomics Center, National Institute of Infectious Diseases                                                                                                                     |
| EPI_ISL_480180, EPI_ISL_480181, EPI_ISL_480182, EPI_ISL_480183, EPI_ISL_480184, EPI_ISL_480185, EPI_ISL_480186, EPI_ISL_480187, EPI_ISL_480188, EPI_ISL_480189                                                                                                                                                                                                                                                                                                                                                                                                                                                                                                                                                                                                                                                                                                                                                                 |           | Ibaraki Prefectural Institute of Public Health                                                               | Pathogen Genomics Center, National Institute of Infectious Diseases                                                                                                                     |
| EPI_ISL_480190, EPI_ISL_480191, EPI_ISL_480192, EPI_ISL_480193, EPI_ISL_480194, EPI_ISL_480195                                                                                                                                                                                                                                                                                                                                                                                                                                                                                                                                                                                                                                                                                                                                                                                                                                 |           | Ota Health Center Welfare Section                                                                            | Pathogen Genomics Center, National Institute of Infectious Diseases                                                                                                                     |
| EPI_ISL_480197, EPI_ISL_480198, EPI_ISL_480199, EPI_ISL_480200, EPI_ISL_480201, EPI_ISL_480202, EPI_ISL_480203                                                                                                                                                                                                                                                                                                                                                                                                                                                                                                                                                                                                                                                                                                                                                                                                                 |           | Toyama Institute of Health                                                                                   | Pathogen Genomics Center, National Institute of Infectious Diseases                                                                                                                     |
| EPI_ISL_480204                                                                                                                                                                                                                                                                                                                                                                                                                                                                                                                                                                                                                                                                                                                                                                                                                                                                                                                 |           | Akita City Public Health Center                                                                              | Pathogen Genomics Center, National Institute of Infectious Diseases                                                                                                                     |
| EPI_ISL_480205, EPI_ISL_480206, EPI_ISL_480207                                                                                                                                                                                                                                                                                                                                                                                                                                                                                                                                                                                                                                                                                                                                                                                                                                                                                 |           | Department of Infectious Diseases, Kobe Institute of Health                                                  | Pathogen Genomics Center, National Institute of Infectious Diseases                                                                                                                     |
| EPI_ISL_480208                                                                                                                                                                                                                                                                                                                                                                                                                                                                                                                                                                                                                                                                                                                                                                                                                                                                                                                 |           | Pathogen Genomics Center, National Institute of Infectious Diseases                                          | Pathogen Genomics Center, National Institute of Infectious Diseases                                                                                                                     |
| EPI_ISL_480209, EPI_ISL_480210, EPI_ISL_480211, EPI_ISL_480212, EPI_ISL_480213, EPI_ISL_480214, EPI_ISL_480215, EPI_ISL_480216, EPI_ISL_480217, EPI_ISL_480218, EPI_ISL_480219, EPI_ISL_480220                                                                                                                                                                                                                                                                                                                                                                                                                                                                                                                                                                                                                                                                                                                                 | see above | Department of Infectious Diseases, Kobe Institute of Health                                                  | Pathogen Genomics Center, National Institute of Infectious Diseases                                                                                                                     |
| EPI_ISL_480221, EPI_ISL_480222, EPI_ISL_480223                                                                                                                                                                                                                                                                                                                                                                                                                                                                                                                                                                                                                                                                                                                                                                                                                                                                                 |           | Koshigaya City Public Health Center                                                                          | Pathogen Genomics Center, National Institute of Infectious Diseases                                                                                                                     |
| EPI_ISL_480228, EPI_ISL_480229, EPI_ISL_480230, EPI_ISL_480232, EPI_ISL_480233, EPI_ISL_480234, EPI_ISL_480235, EPI_ISL_480236, EPI_ISL_480237, EPI_ISL_480238, EPI_ISL_480239, EPI_ISL_480240, EPI_ISL_480241, EPI_ISL_480242, EPI_ISL_480243, EPI_ISL_480244, EPI_ISL_480245, EPI_ISL_480246, EPI_ISL_480247, EPI_ISL_480248, EPI_ISL_480249, EPI_ISL_480250, EPI_ISL_480252, EPI_ISL_480253, EPI_ISL_480254, EPI_ISL_480255, EPI_ISL_480256, EPI_ISL_480257, EPI_ISL_480258, EPI_ISL_480259, EPI_ISL_480260, EPI_ISL_480261, EPI_ISL_480262, EPI_ISL_480263, EPI_ISL_480264, EPI_ISL_480265, EPI_ISL_480266, EPI_ISL_480267, EPI_ISL_480268, EPI_ISL_480269, EPI_ISL_480270, EPI_ISL_480271, EPI_ISL_480272, EPI_ISL_480273, EPI_ISL_480274, EPI_ISL_480277, EPI_ISL_480278, EPI_ISL_480281, EPI_ISL_480282, EPI_ISL_480283, EPI_ISL_480284, EPI_ISL_480285, EPI_ISL_480286, EPI_ISL_480289, EPI_ISL_480291, EPI_ISL_480292 | see above | Genomic Laboratory (GLAB) (Conjoint lab of Health Directorate of Istanbul and Istanbul Technical University) | Genomic Laboratory (GLAB), Istanbul Technical University                                                                                                                                |
| EPI_ISL_480310                                                                                                                                                                                                                                                                                                                                                                                                                                                                                                                                                                                                                                                                                                                                                                                                                                                                                                                 |           | National Reference Laboratory "Influenza and acute respiratory diseases"                                     | NRL-HIV                                                                                                                                                                                 |
| EPI_ISL_480554, EPI_ISL_480556, EPI_ISL_480783, EPI_ISL_480787, EPI_ISL_480789, EPI_ISL_481235, EPI_ISL_481236, EPI_ISL_481237, EPI_ISL_481239, EPI_ISL_481240, EPI_ISL_481243                                                                                                                                                                                                                                                                                                                                                                                                                                                                                                                                                                                                                                                                                                                                                 | see above | Institut Pasteur Dakar                                                                                       | Institut Pasteur de Dakar                                                                                                                                                               |
| EPI_ISL_482575, EPI_ISL_482576, EPI_ISL_482577, EPI_ISL_482578, EPI_ISL_482579, EPI_ISL_482580, EPI_ISL_482581, EPI_ISL_482582, EPI_ISL_482583, EPI_ISL_482584, EPI_ISL_482585, EPI_ISL_482586                                                                                                                                                                                                                                                                                                                                                                                                                                                                                                                                                                                                                                                                                                                                 | see above | Hangzhou Center for Diseases Control and Prevention                                                          | Hangzhou Center for Diseases Control and Prevention                                                                                                                                     |
| EPI_ISL_482672, EPI_ISL_482673, EPI_ISL_482674, EPI_ISL_482675, EPI_ISL_482676, EPI_ISL_482677, EPI_ISL_482680, EPI_ISL_482682, EPI_ISL_482683, EPI_ISL_482684, EPI_ISL_482685, EPI_ISL_482686, EPI_ISL_482687, EPI_ISL_482688, EPI_ISL_482689, EPI_ISL_482690, EPI_ISL_482691, EPI_ISL_482692, EPI_ISL_482693, EPI_ISL_482694, EPI_ISL_482695, EPI_ISL_482696, EPI_ISL_482697, EPI_ISL_482698, EPI_ISL_482699                                                                                                                                                                                                                                                                                                                                                                                                                                                                                                                 | see above | Singapore General Hospital                                                                                   | Department of Microbiology                                                                                                                                                              |
| EPI_ISL_482702, EPI_ISL_482704, EPI_ISL_482705, EPI_ISL_482708, EPI_ISL_482709                                                                                                                                                                                                                                                                                                                                                                                                                                                                                                                                                                                                                                                                                                                                                                                                                                                 |           | Molecular Diagnostics Services (MDS)                                                                         | KRISP, KZN Research Innovation and Sequencing Platform                                                                                                                                  |
| EPI_ISL_482710, EPI_ISL_482711, EPI_ISL_482712                                                                                                                                                                                                                                                                                                                                                                                                                                                                                                                                                                                                                                                                                                                                                                                                                                                                                 |           | NHLS-IALCH                                                                                                   | KRISP, KZN Research Innovation and Sequencing Platform                                                                                                                                  |
| EPI_ISL_482716, EPI_ISL_482717, EPI_ISL_482718, EPI_ISL_482719, EPI_ISL_482720, EPI_ISL_482721, EPI_ISL_482722, EPI_ISL_482723                                                                                                                                                                                                                                                                                                                                                                                                                                                                                                                                                                                                                                                                                                                                                                                                 |           | Molecular Diagnostics Services (MDS)                                                                         | KRISP, KZN Research Innovation and Sequencing Platform                                                                                                                                  |
| EPI_ISL_482726                                                                                                                                                                                                                                                                                                                                                                                                                                                                                                                                                                                                                                                                                                                                                                                                                                                                                                                 |           | NHLS-IALCH                                                                                                   | KRISP, KZN Research Innovation and Sequencing Platform                                                                                                                                  |
| EPI_ISL_482759, EPI_ISL_482760, EPI_ISL_482761, EPI_ISL_482762, EPI_ISL_482763, EPI_ISL_482764, EPI_ISL_482765, EPI_ISL_482766, EPI_ISL_482767, EPI_ISL_482768, EPI_ISL_482769, EPI_ISL_482770, EPI_ISL_482771, EPI_ISL_482772, EPI_ISL_482773, EPI_ISL_482774                                                                                                                                                                                                                                                                                                                                                                                                                                                                                                                                                                                                                                                                 | see above | Medical Ain Shams Research Institute (MASRI), Ain Shams University                                           | Medical Ain Shams Research Institute (MASRI), Ain Shams University                                                                                                                      |
|                                                                                                                                                                                                                                                                                                                                                                                                                                                                                                                                                                                                                                                                                                                                                                                                                                                                                                                                |           |                                                                                                              | Hesham Elghazaly, Sara Hassan Agwa, Ahmad Moustafa, Hala Hafez, Sara Elnakeep, Shaimaa Moustafa, Aya Mohamed, Reham Mamdouh, Ghada Ismael, Ashraf Omar, Osama Mansour, Mahmoud Elmetini |













|                                                                                                                                                                                                                                                                                                                                                                                                                                                                                                                                                                                                                                                                                                                                                                                                                                                                                                                                                                                                                                                                                |                                                                                                                                                                                                                                  |                                                                                                                                      |                                                                                                                                                                                                                                                                                                                                                                                                                |                                                                                                                                                                                                                                                                                                                                                                                                                                                               |
|--------------------------------------------------------------------------------------------------------------------------------------------------------------------------------------------------------------------------------------------------------------------------------------------------------------------------------------------------------------------------------------------------------------------------------------------------------------------------------------------------------------------------------------------------------------------------------------------------------------------------------------------------------------------------------------------------------------------------------------------------------------------------------------------------------------------------------------------------------------------------------------------------------------------------------------------------------------------------------------------------------------------------------------------------------------------------------|----------------------------------------------------------------------------------------------------------------------------------------------------------------------------------------------------------------------------------|--------------------------------------------------------------------------------------------------------------------------------------|----------------------------------------------------------------------------------------------------------------------------------------------------------------------------------------------------------------------------------------------------------------------------------------------------------------------------------------------------------------------------------------------------------------|---------------------------------------------------------------------------------------------------------------------------------------------------------------------------------------------------------------------------------------------------------------------------------------------------------------------------------------------------------------------------------------------------------------------------------------------------------------|
| EPI_ISL_496534                                                                                                                                                                                                                                                                                                                                                                                                                                                                                                                                                                                                                                                                                                                                                                                                                                                                                                                                                                                                                                                                 | B.J. Govt. Medical College                                                                                                                                                                                                       | National Centre For Cell Science                                                                                                     | Dhiraj Paul, Kunal Jani, Radha Chauhan, Janesh Kumar, Vasudevan Seshadri, Girdhari Lal, Rajesh Karyakarta, Suvarna Joshi, Murlidhar Tambe, Sourav Sen, Santosh Karade, Kavita Bala Anand, Shelinder Pal Singh Shergill, Rajiv Mohan Gupta, Manoj Kumar Bhat, Arvind Sahu, Maharashtra COVID-19 Study Group. DBT's PAN-INDIA 1000 SARS-CoV2 RNA genome sequencing consortium, Yogesh S Shouche                  |                                                                                                                                                                                                                                                                                                                                                                                                                                                               |
| EPI_ISL_496537, EPI_ISL_496540, EPI_ISL_496541, EPI_ISL_496542, EPI_ISL_496543, EPI_ISL_496544, EPI_ISL_496545                                                                                                                                                                                                                                                                                                                                                                                                                                                                                                                                                                                                                                                                                                                                                                                                                                                                                                                                                                 | Armed Forces Medical College                                                                                                                                                                                                     | National Centre For Cell Science                                                                                                     | Dhiraj Paul, Kunal Jani, Radha Chauhan, Janesh Kumar, Vasudevan Seshadri, Girdhari Lal, Rajesh Karyakarta, Suvarna Joshi, Murlidhar Tambe, Sourav Sen, Santosh Karade, Kavita Bala Anand, Shelinder Pal Singh Shergill, Rajiv Mohan Gupta, Manoj Kumar Bhat, Arvind Sahu, Maharashtra COVID-19 Study Group. DBT's PAN-INDIA 1000 SARS-CoV2 RNA genome sequencing consortium, Yogesh S Shouche                  |                                                                                                                                                                                                                                                                                                                                                                                                                                                               |
| EPI_ISL_496548, EPI_ISL_496549, EPI_ISL_496551                                                                                                                                                                                                                                                                                                                                                                                                                                                                                                                                                                                                                                                                                                                                                                                                                                                                                                                                                                                                                                 | B.J. Govt. Medical College                                                                                                                                                                                                       | National Centre For Cell Science                                                                                                     | Dhiraj Paul, Kunal Jani, Radha Chauhan, Janesh Kumar, Vasudevan Seshadri, Girdhari Lal, Rajesh Karyakarta, Suvarna Joshi, Murlidhar Tambe, Sourav Sen, Santosh Karade, Kavita Bala Anand, Shelinder Pal Singh Shergill, Rajiv Mohan Gupta, Manoj Kumar Bhat, Arvind Sahu, Maharashtra COVID-19 Study Group. DBT's PAN-INDIA 1000 SARS-CoV2 RNA genome sequencing consortium, Yogesh S Shouche                  |                                                                                                                                                                                                                                                                                                                                                                                                                                                               |
| EPI_ISL_496555, EPI_ISL_496556, EPI_ISL_496557, EPI_ISL_496559, EPI_ISL_496560, EPI_ISL_496571, EPI_ISL_496581, EPI_ISL_496587                                                                                                                                                                                                                                                                                                                                                                                                                                                                                                                                                                                                                                                                                                                                                                                                                                                                                                                                                 | National Centre For Cell Science                                                                                                                                                                                                 | National Centre For Cell Science                                                                                                     | Dhiraj Paul, Kunal Jani, Radha Chauhan, Janesh Kumar, Vasudevan Seshadri, Girdhari Lal, Rajesh Karyakarta, Suvarna Joshi, Murlidhar Tambe, Sourav Sen, Santosh Karade, Kavita Bala Anand, Shelinder Pal Singh Shergill, Rajiv Mohan Gupta, Manoj Kumar Bhat, Arvind Sahu, Maharashtra COVID-19 Study Group. DBT's PAN-INDIA 1000 SARS-CoV2 RNA genome sequencing consortium, Yogesh S Shouche                  |                                                                                                                                                                                                                                                                                                                                                                                                                                                               |
| EPI_ISL_497736, EPI_ISL_497738, EPI_ISL_497744, EPI_ISL_497745                                                                                                                                                                                                                                                                                                                                                                                                                                                                                                                                                                                                                                                                                                                                                                                                                                                                                                                                                                                                                 | Instituto Nacional de Salud, Bogotá, Colombia                                                                                                                                                                                    | Instituto Nacional de Salud, Bogotá, Colombia                                                                                        | Katherine Laiton-Donato, Diego A. Álvarez-Díaz, Carlos Franco-Muñoz, Jonathan Reales, Diego Andrés Prada, Jose A. Usme-Ciro, Nicolas D. Franco-Sierra, Zulma M. Cucunubá, Christian Julian Villabona-Arenas, Liz Villabona-Arenas, Sussy Echeverría, Astrid C. Flórez, Carolina Ferro, Diana Marcela Walteros-Acero, Franklin Prieto, Carlos Andrés Durán, Martha Lucia Ospina Martínez, Marcela Mercado-Reyes |                                                                                                                                                                                                                                                                                                                                                                                                                                                               |
| EPI_ISL_497758, EPI_ISL_497760                                                                                                                                                                                                                                                                                                                                                                                                                                                                                                                                                                                                                                                                                                                                                                                                                                                                                                                                                                                                                                                 | CSIR-CDRIS/SGPGI, Lucknow                                                                                                                                                                                                        | CSIR-CDRIS/SGPGI, Lucknow                                                                                                            | Saumya Sarkar, Dharam Veer Singh, Rahul Vishvkarma, Ujjala Ghoshal, Uday Ghoshal, Ravishankar Ramachandran, Tapas Kumar Kundu, Rajender Singh                                                                                                                                                                                                                                                                  |                                                                                                                                                                                                                                                                                                                                                                                                                                                               |
| EPI_ISL_497762, EPI_ISL_497763                                                                                                                                                                                                                                                                                                                                                                                                                                                                                                                                                                                                                                                                                                                                                                                                                                                                                                                                                                                                                                                 | CSIR-CDRIS/SGPGI, Lucknow                                                                                                                                                                                                        | CSIR-CDRIS/SGPGI, Lucknow                                                                                                            | Saumya Sarkar, Dharam Veer Singh, Rahul Vishvkarma, Ujjala Ghoshal, Uday Ghoshal, Ravishankar Ramachandran, Tapas Kumar Kundu, Rajender Singh                                                                                                                                                                                                                                                                  |                                                                                                                                                                                                                                                                                                                                                                                                                                                               |
| EPI_ISL_497764                                                                                                                                                                                                                                                                                                                                                                                                                                                                                                                                                                                                                                                                                                                                                                                                                                                                                                                                                                                                                                                                 | CSIR-CDRIS/SGPGI, Lucknow                                                                                                                                                                                                        | CSIR-CDRIS/SGPGI, Lucknow                                                                                                            | Saumya Sarkar, Dharam Veer Singh, Rahul Vishvkarma, Ujjala Ghoshal, Uday Ghoshal, Ravishankar Ramachandran, Tapas Kumar Kundu, Rajender Singh                                                                                                                                                                                                                                                                  |                                                                                                                                                                                                                                                                                                                                                                                                                                                               |
| EPI_ISL_497765                                                                                                                                                                                                                                                                                                                                                                                                                                                                                                                                                                                                                                                                                                                                                                                                                                                                                                                                                                                                                                                                 | CSIR-CDRIS/SGPGI, Lucknow                                                                                                                                                                                                        | CSIR-CDRIS/SGPGI, Lucknow                                                                                                            | Saumya Sarkar, Dharam Veer Singh, Rahul Vishvkarma, Ujjala Ghoshal, Uday Ghoshal, Ravishankar Ramachandran, Tapas Kumar Kundu, Rajender Singh                                                                                                                                                                                                                                                                  |                                                                                                                                                                                                                                                                                                                                                                                                                                                               |
| EPI_ISL_497766                                                                                                                                                                                                                                                                                                                                                                                                                                                                                                                                                                                                                                                                                                                                                                                                                                                                                                                                                                                                                                                                 | CSIR-CDRIS/SGPGI, Lucknow                                                                                                                                                                                                        | CSIR-CDRIS/SGPGI, Lucknow                                                                                                            | Saumya Sarkar, Dharam Veer Singh, Rahul Vishvkarma, Ujjala Ghoshal, Uday Ghoshal, Ravishankar Ramachandran, Tapas Kumar Kundu, Rajender Singh                                                                                                                                                                                                                                                                  |                                                                                                                                                                                                                                                                                                                                                                                                                                                               |
| EPI_ISL_497767                                                                                                                                                                                                                                                                                                                                                                                                                                                                                                                                                                                                                                                                                                                                                                                                                                                                                                                                                                                                                                                                 | CSIR-CDRIS/SGPGI, Lucknow                                                                                                                                                                                                        | CSIR-CDRIS/SGPGI, Lucknow                                                                                                            | Saumya Sarkar, Dharam Veer Singh, Rahul Vishvkarma, Ujjala Ghoshal, Uday Ghoshal, Ravishankar Ramachandran, Tapas Kumar Kundu, Rajender Singh                                                                                                                                                                                                                                                                  |                                                                                                                                                                                                                                                                                                                                                                                                                                                               |
| EPI_ISL_497950                                                                                                                                                                                                                                                                                                                                                                                                                                                                                                                                                                                                                                                                                                                                                                                                                                                                                                                                                                                                                                                                 | Shaoxing CDC                                                                                                                                                                                                                     | Zhejiang Provincial Center for Disease Control and Prevention                                                                        | Yin Chen, Yanjun Zhang, Haiyan Mao, Junhang Pan, Xiuyu Lou, Yi Sun, Hao Yan, Zhen Li, Wen Shi                                                                                                                                                                                                                                                                                                                  |                                                                                                                                                                                                                                                                                                                                                                                                                                                               |
| EPI_ISL_498055, EPI_ISL_498060, EPI_ISL_498061, EPI_ISL_498062, EPI_ISL_498064, EPI_ISL_498065, EPI_ISL_498066, EPI_ISL_498067, EPI_ISL_498069, EPI_ISL_498070, EPI_ISL_498071, EPI_ISL_498072, EPI_ISL_498073, EPI_ISL_498074, EPI_ISL_498075, EPI_ISL_498076, EPI_ISL_498077, EPI_ISL_498078, EPI_ISL_498079, EPI_ISL_498081, EPI_ISL_498082, EPI_ISL_498083, EPI_ISL_498084, EPI_ISL_498085, EPI_ISL_498086, EPI_ISL_498087, EPI_ISL_498088, EPI_ISL_498089, EPI_ISL_498090, EPI_ISL_498091, EPI_ISL_498092, EPI_ISL_498093, EPI_ISL_498094, EPI_ISL_498095, EPI_ISL_498096, EPI_ISL_498097, EPI_ISL_498098, EPI_ISL_498099, EPI_ISL_498100, EPI_ISL_498101, EPI_ISL_498102, EPI_ISL_498103, EPI_ISL_498104, EPI_ISL_498105, EPI_ISL_498106, EPI_ISL_498107, EPI_ISL_498108, EPI_ISL_498109, EPI_ISL_498110, EPI_ISL_498111, EPI_ISL_498112, EPI_ISL_498113, EPI_ISL_498114, EPI_ISL_498115, EPI_ISL_498116, EPI_ISL_498117, EPI_ISL_498118, EPI_ISL_498119, EPI_ISL_498120, EPI_ISL_498121, EPI_ISL_498122, EPI_ISL_498123, EPI_ISL_498124, EPI_ISL_498125, EPI_ISL_498126 | see above                                                                                                                                                                                                                        | NHLS-IALCH                                                                                                                           | KRISP, KZN Research Innovation and Sequencing Platform                                                                                                                                                                                                                                                                                                                                                         | Giandhari J., Pillay S., Lessells R., Chimukangara B., Mdlalose K., York D., Khan S., Tegally H., Wilkinson E., de Oliveira T                                                                                                                                                                                                                                                                                                                                 |
| EPI_ISL_498152, EPI_ISL_498153, EPI_ISL_498154, EPI_ISL_498155, EPI_ISL_498156, EPI_ISL_498157, EPI_ISL_498158, EPI_ISL_498159, EPI_ISL_498160, EPI_ISL_498161, EPI_ISL_498162, EPI_ISL_498163, EPI_ISL_498164, EPI_ISL_498165, EPI_ISL_498166, EPI_ISL_498167, EPI_ISL_498168, EPI_ISL_498169, EPI_ISL_498170                                                                                                                                                                                                                                                                                                                                                                                                                                                                                                                                                                                                                                                                                                                                                                 | see above                                                                                                                                                                                                                        | Instituto Nacional de Salud, Bogotá, Colombia                                                                                        | Instituto Nacional de Salud, Bogotá, Colombia                                                                                                                                                                                                                                                                                                                                                                  | Katherine Laiton-Donato, Diego A. Álvarez-Díaz, Carlos Franco-Muñoz, Jonathan Reales, Diego Andrés Prada, Jose A. Usme-Ciro, Nicolas D. Franco-Sierra, Zulma M. Cucunubá, Christian Julian Villabona-Arenas, Liz Villabona-Arenas, Sussy Echeverría, Astrid C. Flórez, Carolina Ferro, Diana Marcela Walteros-Acero, Franklin Prieto, Carlos Andrés Durán, Martha Lucia Ospina Martínez, Marcela Mercado-Reyes                                                |
| EPI_ISL_498171, EPI_ISL_498172, EPI_ISL_498173, EPI_ISL_498174, EPI_ISL_498175, EPI_ISL_498176, EPI_ISL_498177, EPI_ISL_498178, EPI_ISL_498179, EPI_ISL_498180, EPI_ISL_498181, EPI_ISL_498182, EPI_ISL_498183, EPI_ISL_498184, EPI_ISL_498185, EPI_ISL_498186, EPI_ISL_498187, EPI_ISL_498188, EPI_ISL_498189, EPI_ISL_498190, EPI_ISL_498191, EPI_ISL_498192                                                                                                                                                                                                                                                                                                                                                                                                                                                                                                                                                                                                                                                                                                                 | see above                                                                                                                                                                                                                        | OUCRU                                                                                                                                | OUCRU                                                                                                                                                                                                                                                                                                                                                                                                          | Nguyen Van Vinh Chau, Nguyen Thi Thu Hong, Nguyen Thi Han Ny, Le Nguyen Truc Nhu, Nghiem My Ngoc, Vo Thanh Lam, Nguyen Thanh Dung, Lam Minh Yen, Ngo Ngoc Quang Minh, Le Manh Hung, Nguyen Tri Dung, Dinh Nguyen Huy Man, Lam Anh Nguyenet, Tran Chanh Xuan, Tran Tinh Hien, Nguyen Thanh Phong, Tran Nguyen Hoang Tu, Tran Tan Thanh, Nguyen Thanh Trung, Nguyen Tan Binh, Tang Chi Thuong, Guy Thwaites, and Le Van Tan, for OUCRU COVID-19 research group* |
| EPI_ISL_498229, EPI_ISL_498230, EPI_ISL_498236, EPI_ISL_498238, EPI_ISL_498242, EPI_ISL_498243, EPI_ISL_498249, EPI_ISL_498250                                                                                                                                                                                                                                                                                                                                                                                                                                                                                                                                                                                                                                                                                                                                                                                                                                                                                                                                                 | Institut Pasteur de Dakar                                                                                                                                                                                                        | Institut Pasteur de Dakar                                                                                                            | Ndongo Dia, Moussa Moise Diagne, Mamadou Diop, Marie Henriette Dior Ndione, Mamadou Malado Jallow, Safietou Sankhe Mbengue, Ousmane Faye, Amadou Alpha Sall.                                                                                                                                                                                                                                                   |                                                                                                                                                                                                                                                                                                                                                                                                                                                               |
| EPI_ISL_498551, EPI_ISL_498552, EPI_ISL_498554                                                                                                                                                                                                                                                                                                                                                                                                                                                                                                                                                                                                                                                                                                                                                                                                                                                                                                                                                                                                                                 | Lebanese American University                                                                                                                                                                                                     | Lebanese American University                                                                                                         | Abi Habib,W., Abdallah,J., El Shesheny,R., Mokhat,J., Webby,R.J., Goldstein,J. and Kayali,G.                                                                                                                                                                                                                                                                                                                   |                                                                                                                                                                                                                                                                                                                                                                                                                                                               |
| EPI_ISL_498558, EPI_ISL_498559, EPI_ISL_498560, EPI_ISL_498561                                                                                                                                                                                                                                                                                                                                                                                                                                                                                                                                                                                                                                                                                                                                                                                                                                                                                                                                                                                                                 | Laboratory of Molecular Virology International Center for Genetic Engineering and Biotechnology (ICGEB)                                                                                                                          | ARGO Open Lab Platform for Genome Sequencing                                                                                         | Licastro D, Rajasekharan S, Dal Monego S, Segat L, D'Agaro P, Marcello A                                                                                                                                                                                                                                                                                                                                       |                                                                                                                                                                                                                                                                                                                                                                                                                                                               |
| EPI_ISL_498562                                                                                                                                                                                                                                                                                                                                                                                                                                                                                                                                                                                                                                                                                                                                                                                                                                                                                                                                                                                                                                                                 | Laboratory of Molecular Virology International Center for Genetic Engineering and Biotechnology (ICGEB)                                                                                                                          | ARGO Open Lab Platform for Genome Sequencing                                                                                         | Licastro D, Rajasekharan S, Dal Monego S, Segat L, D'Agaro P, Marcello A                                                                                                                                                                                                                                                                                                                                       |                                                                                                                                                                                                                                                                                                                                                                                                                                                               |
| EPI_ISL_498563                                                                                                                                                                                                                                                                                                                                                                                                                                                                                                                                                                                                                                                                                                                                                                                                                                                                                                                                                                                                                                                                 | Laboratory of Molecular Virology International Center for Genetic Engineering and Biotechnology (ICGEB)                                                                                                                          | ARGO Open Lab Platform for Genome Sequencing                                                                                         | Licastro D, Rajasekharan S, Dal Monego S, Segat L, D'Agaro P, Marcello A                                                                                                                                                                                                                                                                                                                                       |                                                                                                                                                                                                                                                                                                                                                                                                                                                               |
| EPI_ISL_499083                                                                                                                                                                                                                                                                                                                                                                                                                                                                                                                                                                                                                                                                                                                                                                                                                                                                                                                                                                                                                                                                 | Instituto de Virologia "Dr. J. M. Vanella", Facultad de Ciencias Medicas, Universidad Nacional de Cordoba. Laboratorio Central de la Provincia de Cordoba, Argentina. Ministerio de Salud de la provincia de Cordoba, Argentina. | Laboratorio de Virología, Hospital de Niños Ricardo Gutiérrez, CABA, Argentina.                                                      | Sandra Gallego, Brenda Konigheim, Sebastian Blanco, Lorena Spinsanti, Javier Aguilar, Adrian Diaz, Gonzalo Castro, Gabriela Barbas, Mercedes Nabaes, Stephanie George, Monica Natale, Silvina Lusso, Mariana Viegas.                                                                                                                                                                                           |                                                                                                                                                                                                                                                                                                                                                                                                                                                               |
| EPI_ISL_500539, EPI_ISL_500540, EPI_ISL_500541, EPI_ISL_500542, EPI_ISL_500543, EPI_ISL_500544, EPI_ISL_500545, EPI_ISL_500546, EPI_ISL_500547, EPI_ISL_500548, EPI_ISL_500550, EPI_ISL_500551, EPI_ISL_500552, EPI_ISL_500553, EPI_ISL_500554, EPI_ISL_500555, EPI_ISL_500556, EPI_ISL_500557, EPI_ISL_500558, EPI_ISL_500559, EPI_ISL_500560, EPI_ISL_500561, EPI_ISL_500562, EPI_ISL_500563, EPI_ISL_500564, EPI_ISL_500565, EPI_ISL_500566, EPI_ISL_500567, EPI_ISL_500568, EPI_ISL_500569, EPI_ISL_500570, EPI_ISL_500571, EPI_ISL_500572                                                                                                                                                                                                                                                                                                                                                                                                                                                                                                                                 | see above                                                                                                                                                                                                                        | Department of Microbiology                                                                                                           | Nurdyana Abdul Rahman, Kun Lee Lim, Chenhao Li, Kian Sing Chan, Lynette Oon, Kern Rei Chng, Niranjan Nagarajan, Karrie Ko                                                                                                                                                                                                                                                                                      |                                                                                                                                                                                                                                                                                                                                                                                                                                                               |
| EPI_ISL_500946                                                                                                                                                                                                                                                                                                                                                                                                                                                                                                                                                                                                                                                                                                                                                                                                                                                                                                                                                                                                                                                                 | GMERS Medical College & Hospital, Gotri, Vadodara                                                                                                                                                                                | Gujarat Biotechnology Research Centre                                                                                                | Zuber Saiyed, Komal Patel, Labdhi Pandya, Afzal Ansari, Nikha Trivedi, Meenakshi Shah, Neena Doshi, Varsha Godbole, Apurvasinh Puvar, Janvi Raval, Zarna Patel, Monika Gandhi, Pinal Trivedi, Maharshi Pandya, Nidhi Patel, Nitin Savaliya, Raghawendra Kumar, Dinesh Kumar, R D Dixit, A M Kadri, Harsh Bakshi, Chaitanya Joshi, Madhvi Joshi                                                                 |                                                                                                                                                                                                                                                                                                                                                                                                                                                               |
| EPI_ISL_500947                                                                                                                                                                                                                                                                                                                                                                                                                                                                                                                                                                                                                                                                                                                                                                                                                                                                                                                                                                                                                                                                 | Department of MicroBiology, Government Medical College, Surat                                                                                                                                                                    | Gujarat Biotechnology Research Centre                                                                                                | Maharshi Pandya, Nidhi Patel, Nitin Savaliya, Raghawendra Kumar, Dinesh Kumar, Zuber Saiyed, Komal Patel, Labdhi Pandya, Afzal Ansari, Nikha Trivedi, Naresh Chauhan, Summaiya Mullan, Amit gamit, Apurvasinh Puvar, Janvi Raval, Zarna Patel, Monika Gandhi, Pinal Trivedi, R D Dixit, A M Kadri, Harsh Bakshi, Chaitanya Joshi, Madhvi Joshi                                                                 |                                                                                                                                                                                                                                                                                                                                                                                                                                                               |
| EPI_ISL_500948                                                                                                                                                                                                                                                                                                                                                                                                                                                                                                                                                                                                                                                                                                                                                                                                                                                                                                                                                                                                                                                                 | Department of MicroBiology, Government Medical College, Surat                                                                                                                                                                    | Gujarat Biotechnology Research Centre                                                                                                | Zuber Saiyed, Komal Patel, Labdhi Pandya, Afzal Ansari, Nikha Trivedi, Naresh Chauhan, Summaiya Mullan, Amit gamit, Apurvasinh Puvar, Janvi Raval, Zarna Patel, Monika Gandhi, Pinal Trivedi, Maharshi Pandya, Nidhi Patel, Nitin Savaliya, Raghawendra Kumar, Dinesh Kumar, R D Dixit, A M Kadri, Harsh Bakshi, Chaitanya Joshi, Madhvi Joshi                                                                 |                                                                                                                                                                                                                                                                                                                                                                                                                                                               |
| EPI_ISL_500949                                                                                                                                                                                                                                                                                                                                                                                                                                                                                                                                                                                                                                                                                                                                                                                                                                                                                                                                                                                                                                                                 | Department of MicroBiology, Government Medical College, Surat                                                                                                                                                                    | Gujarat Biotechnology Research Centre                                                                                                | Komal Patel, Labdhi Pandya, Afzal Ansari, Nikha Trivedi, Naresh Chauhan, Summaiya Mullan, Amit gamit, Apurvasinh Puvar, Janvi Raval, Zarna Patel, Monika Gandhi, Pinal Trivedi, Maharshi Pandya, Nidhi Patel, Nitin Savaliya, Raghawendra Kumar, Dinesh Kumar, Zuber Saiyed, R D Dixit, A M Kadri, Harsh Bakshi, Chaitanya Joshi, Madhvi Joshi                                                                 |                                                                                                                                                                                                                                                                                                                                                                                                                                                               |
| EPI_ISL_500950                                                                                                                                                                                                                                                                                                                                                                                                                                                                                                                                                                                                                                                                                                                                                                                                                                                                                                                                                                                                                                                                 | Department of MicroBiology, Government Medical College, Surat                                                                                                                                                                    | Gujarat Biotechnology Research Centre                                                                                                | Labdhi Pandya, Afzal Ansari, Nikha Trivedi, Naresh Chauhan, Summaiya Mullan, Amit gamit, Apurvasinh Puvar, Janvi Raval, Zarna Patel, Monika Gandhi, Pinal Trivedi, Maharshi Pandya, Nidhi Patel, Nitin Savaliya, Raghawendra Kumar, Dinesh Kumar, Zuber Saiyed, Komal Patel, R D Dixit, A M Kadri, Harsh Bakshi, Chaitanya Joshi, Madhvi Joshi                                                                 |                                                                                                                                                                                                                                                                                                                                                                                                                                                               |
| EPI_ISL_501167, EPI_ISL_501169, EPI_ISL_501171, EPI_ISL_501172, EPI_ISL_501173                                                                                                                                                                                                                                                                                                                                                                                                                                                                                                                                                                                                                                                                                                                                                                                                                                                                                                                                                                                                 | Baylor College of Medicine                                                                                                                                                                                                       | Baylor College of Medicine: HGSC                                                                                                     | Vasanthi Avadhanula, Erin Nicholson, David Henke, Pedro Piedra, Harsha Doddapaneni, Donna Muzny, Qingchang Meng, Hsu Chao, Zeineen Momin, Hua Shen, George Weissenberger, Kavya Kottappalli, Yimiti Meihergull, Sejal Salvi, Ginger Metcalf, Vipin Menon, Sara J.J. Cregeen, Matthew C. Ross, Tulin Ayvaz, Richard Suggang, Kristi L. Hoffman, Matthew Wong, Joseph F. Petrosino                               |                                                                                                                                                                                                                                                                                                                                                                                                                                                               |
| EPI_ISL_501176, EPI_ISL_501177, EPI_ISL_501178, EPI_ISL_501179, EPI_ISL_501180, EPI_ISL_501181, EPI_ISL_501182, EPI_ISL_501183, EPI_ISL_501184, EPI_ISL_501185, EPI_ISL_501186, EPI_ISL_501187, EPI_ISL_501188, EPI_ISL_501189, EPI_ISL_501190, EPI_ISL_501191, EPI_ISL_501192, EPI_ISL_501193, EPI_ISL_501194, EPI_ISL_501195, EPI_ISL_501196, EPI_ISL_501197, EPI_ISL_501198, EPI_ISL_501199, EPI_ISL_501200, EPI_ISL_501201, EPI_ISL_501202, EPI_ISL_501203, EPI_ISL_501204, EPI_ISL_501205, EPI_ISL_501206, EPI_ISL_501207, EPI_ISL_501208, EPI_ISL_501209, EPI_ISL_501210, EPI_ISL_501211, EPI_ISL_501212, EPI_ISL_501213, EPI_ISL_501214, EPI_ISL_501215, EPI_ISL_501216, EPI_ISL_501217, EPI_ISL_501218, EPI_ISL_501219, EPI_ISL_501220, EPI_ISL_501221, EPI_ISL_501222, EPI_ISL_501223, EPI_ISL_501224, EPI_ISL_501225, EPI_ISL_501226, EPI_ISL_501227, EPI_ISL_501228                                                                                                                                                                                                 | see above                                                                                                                                                                                                                        | Department of Medical Microbiology, University Malaya Medical Centre                                                                 | Department of Medical Microbiology, Faculty of Medicine, University of Malaya                                                                                                                                                                                                                                                                                                                                  | Yoong Min CHONG, Jennifer Chong, I-Ching SAM, Yoke Fun CHAN, University Malaya Medical Centre COVID Team                                                                                                                                                                                                                                                                                                                                                      |
| EPI_ISL_501230                                                                                                                                                                                                                                                                                                                                                                                                                                                                                                                                                                                                                                                                                                                                                                                                                                                                                                                                                                                                                                                                 | Hellenic Pasteur Institute, Public Health Laboratories                                                                                                                                                                           | Hellenic Pasteur Institute, National Influenza Reference laboratory of Southern Greece & Unit of Bioinformatics and Applied Genomics | Vasiliki Pogka, Timokratis Karamitros, Athanasios Kossyvakis, Antonios Kalliaropoulos, Horefti Elina, Evangelidou Maria, Androniki Voulgari-Kokota, Aspasia Kontou, Andreas Mentis                                                                                                                                                                                                                             |                                                                                                                                                                                                                                                                                                                                                                                                                                                               |
| EPI_ISL_501233, EPI_ISL_501236, EPI_ISL_501248, EPI_ISL_501249, EPI_ISL_501250, EPI_ISL_501251                                                                                                                                                                                                                                                                                                                                                                                                                                                                                                                                                                                                                                                                                                                                                                                                                                                                                                                                                                                 | Hellenic Pasteur Institute, National Influenza Reference laboratory of Southern Greece & Unit of Bioinformatics and Applied Genomics                                                                                             | Hellenic Pasteur Institute, National Influenza Reference laboratory of Southern Greece & Unit of Bioinformatics and Applied Genomics | Vasiliki Pogka, Timokratis Karamitros, Athanasios Kossyvakis, Antonios Kalliaropoulos, Horefti Elina, Evangelidou Maria, Androniki Voulgari-Kokota, Aspasia Kontou, Andreas Mentis                                                                                                                                                                                                                             |                                                                                                                                                                                                                                                                                                                                                                                                                                                               |
| EPI_ISL_505003                                                                                                                                                                                                                                                                                                                                                                                                                                                                                                                                                                                                                                                                                                                                                                                                                                                                                                                                                                                                                                                                 | Biology Dpt                                                                                                                                                                                                                      | Microbiology and Infections Diseases                                                                                                 | Emmanuelle Billon-Denis, Audrey Ferrier-Rembert, Annabelle Garnier, Laurence Cheutin, Clarisse Vigne, Emilie Tessier, Jessica Denis, Olivier Gorgé, Flora Nolent, Isabelle Drouet, Noémie Verguet, Olivier Ferraris, Jean-Nicolas Tournier                                                                                                                                                                     |                                                                                                                                                                                                                                                                                                                                                                                                                                                               |
| EPI_ISL_506996                                                                                                                                                                                                                                                                                                                                                                                                                                                                                                                                                                                                                                                                                                                                                                                                                                                                                                                                                                                                                                                                 | Department of Medical Microbiology, University Malaya Medical Centre                                                                                                                                                             | Department of Medical Microbiology, Faculty of Medicine, University of Malaya                                                        | Yoong Min CHONG, Jennifer Chong, I-Ching SAM, Yoke Fun CHAN, University Malaya Medical Centre COVID Team                                                                                                                                                                                                                                                                                                       |                                                                                                                                                                                                                                                                                                                                                                                                                                                               |
| EPI_ISL_507002, EPI_ISL_507003, EPI_ISL_507004, EPI_ISL_507005, EPI_ISL_507006                                                                                                                                                                                                                                                                                                                                                                                                                                                                                                                                                                                                                                                                                                                                                                                                                                                                                                                                                                                                 | Department of Laboratory Medicine, Tan Tock Seng Hospital                                                                                                                                                                        | Department of Laboratory Medicine, Tan Tock Seng Hospital                                                                            | Chen YYC, Zair X, Li C, Tang WY, Maurer-Stroh S, Barkham TMS, Nagarajan N, Sessions OM                                                                                                                                                                                                                                                                                                                         |                                                                                                                                                                                                                                                                                                                                                                                                                                                               |
| EPI_ISL_507008                                                                                                                                                                                                                                                                                                                                                                                                                                                                                                                                                                                                                                                                                                                                                                                                                                                                                                                                                                                                                                                                 | National Veterinary Institute                                                                                                                                                                                                    | National Veterinary Institute                                                                                                        | Siamak Zohari                                                                                                                                                                                                                                                                                                                                                                                                  |                                                                                                                                                                                                                                                                                                                                                                                                                                                               |
| EPI_ISL_507206, EPI_ISL_507207, EPI_ISL_507208, EPI_ISL_507209, EPI_ISL_507210, EPI_ISL_507211, EPI_ISL_507212, EPI_ISL_507213, EPI_ISL_507214, EPI_ISL_507215                                                                                                                                                                                                                                                                                                                                                                                                                                                                                                                                                                                                                                                                                                                                                                                                                                                                                                                 | Department of Experimental Modeling and Pathogenesis of Infectious Diseases                                                                                                                                                      | WHO National Influenza Centre Russian Federation                                                                                     | Andrey Komissarov, Artem Fadeev, Mariia Sergeeva, Anna Ivanova, Daria Danilenko                                                                                                                                                                                                                                                                                                                                |                                                                                                                                                                                                                                                                                                                                                                                                                                                               |

|                                                                                                                                                                                                                                                                                                                                                                                                                                                                                                                                                                                                                                                                                                                                                                                                                                                                                                                                                                                                                                                                                                                                                                                                                                                                                                                                                                                                                                                                                                                                                                                                                                                                                                                                                                                                                                                                                                                                                                                                                                                                                                                                                                                                                                                                                                                |           |                                                                                                        |                                                                                                                                                                                                               |                                                                                                                                                                                                                                                                                                                                                                 |
|----------------------------------------------------------------------------------------------------------------------------------------------------------------------------------------------------------------------------------------------------------------------------------------------------------------------------------------------------------------------------------------------------------------------------------------------------------------------------------------------------------------------------------------------------------------------------------------------------------------------------------------------------------------------------------------------------------------------------------------------------------------------------------------------------------------------------------------------------------------------------------------------------------------------------------------------------------------------------------------------------------------------------------------------------------------------------------------------------------------------------------------------------------------------------------------------------------------------------------------------------------------------------------------------------------------------------------------------------------------------------------------------------------------------------------------------------------------------------------------------------------------------------------------------------------------------------------------------------------------------------------------------------------------------------------------------------------------------------------------------------------------------------------------------------------------------------------------------------------------------------------------------------------------------------------------------------------------------------------------------------------------------------------------------------------------------------------------------------------------------------------------------------------------------------------------------------------------------------------------------------------------------------------------------------------------|-----------|--------------------------------------------------------------------------------------------------------|---------------------------------------------------------------------------------------------------------------------------------------------------------------------------------------------------------------|-----------------------------------------------------------------------------------------------------------------------------------------------------------------------------------------------------------------------------------------------------------------------------------------------------------------------------------------------------------------|
| EPI_ISL_507225, EPI_ISL_507226, EPI_ISL_507261, EPI_ISL_507262, EPI_ISL_507263, EPI_ISL_507264, EPI_ISL_507274, EPI_ISL_507279, EPI_ISL_507291, EPI_ISL_507292, EPI_ISL_507293, EPI_ISL_507294                                                                                                                                                                                                                                                                                                                                                                                                                                                                                                                                                                                                                                                                                                                                                                                                                                                                                                                                                                                                                                                                                                                                                                                                                                                                                                                                                                                                                                                                                                                                                                                                                                                                                                                                                                                                                                                                                                                                                                                                                                                                                                                 | see above | WHO National Influenza Centre Russian Federation                                                       | WHO National Influenza Centre Russian Federation                                                                                                                                                              | Andrey Komissarov, Artem Fadeev, Mariia Sergeeva, Anna Ivanova, Daria Danilenko                                                                                                                                                                                                                                                                                 |
| EPI_ISL_508862, EPI_ISL_508863                                                                                                                                                                                                                                                                                                                                                                                                                                                                                                                                                                                                                                                                                                                                                                                                                                                                                                                                                                                                                                                                                                                                                                                                                                                                                                                                                                                                                                                                                                                                                                                                                                                                                                                                                                                                                                                                                                                                                                                                                                                                                                                                                                                                                                                                                 |           | Virology Unit, Institut Pasteur de Madagascar                                                          | Virology Unit, Institut Pasteur de Madagascar                                                                                                                                                                 | Christian Ranaivoson, Cara Brook, Norosoa Razanajatovo, Vida Ahyong, Tsiry Randriambolanantsoa, Michelle Tan, Vololonaina Raharinosy, Helisoa Razafimanjato, Cristina M. Tato, Joseph L. DeRisi, Soa Fy Andriamandimby, Jean-Michel Heraud                                                                                                                      |
| EPI_ISL_509223, EPI_ISL_509224, EPI_ISL_509225, EPI_ISL_509226, EPI_ISL_509228, EPI_ISL_509229, EPI_ISL_509230, EPI_ISL_509231, EPI_ISL_509232, EPI_ISL_509233, EPI_ISL_509234, EPI_ISL_509235, EPI_ISL_509236, EPI_ISL_509237, EPI_ISL_509238, EPI_ISL_509239, EPI_ISL_509240, EPI_ISL_509241, EPI_ISL_509242, EPI_ISL_509243, EPI_ISL_509244, EPI_ISL_509245, EPI_ISL_509246, EPI_ISL_509247, EPI_ISL_509248, EPI_ISL_509249, EPI_ISL_509250, EPI_ISL_509251, EPI_ISL_509252, EPI_ISL_509253, EPI_ISL_509254, EPI_ISL_509255, EPI_ISL_509256, EPI_ISL_509257, EPI_ISL_509258, EPI_ISL_509259, EPI_ISL_509260, EPI_ISL_509261, EPI_ISL_509262, EPI_ISL_509263, EPI_ISL_509264, EPI_ISL_509265, EPI_ISL_509266, EPI_ISL_509267, EPI_ISL_509268, EPI_ISL_509269, EPI_ISL_509270, EPI_ISL_509271, EPI_ISL_509272, EPI_ISL_509273, EPI_ISL_509274, EPI_ISL_509275, EPI_ISL_509276, EPI_ISL_509279, EPI_ISL_509281, EPI_ISL_509283, EPI_ISL_509284, EPI_ISL_509285, EPI_ISL_509286, EPI_ISL_509287, EPI_ISL_509288, EPI_ISL_509289, EPI_ISL_509290, EPI_ISL_509292, EPI_ISL_509293, EPI_ISL_509294, EPI_ISL_509295, EPI_ISL_509296, EPI_ISL_509297, EPI_ISL_509299, EPI_ISL_509300, EPI_ISL_509301, EPI_ISL_509302, EPI_ISL_509303, EPI_ISL_509304, EPI_ISL_509305, EPI_ISL_509306, EPI_ISL_509307, EPI_ISL_509308, EPI_ISL_509309, EPI_ISL_509310, EPI_ISL_509311, EPI_ISL_509312, EPI_ISL_509313, EPI_ISL_509314, EPI_ISL_509315, EPI_ISL_509316, EPI_ISL_509317, EPI_ISL_509318, EPI_ISL_509319, EPI_ISL_509320, EPI_ISL_509321, EPI_ISL_509322, EPI_ISL_509323, EPI_ISL_509324, EPI_ISL_509325, EPI_ISL_509326, EPI_ISL_509327, EPI_ISL_509328, EPI_ISL_509329, EPI_ISL_509330, EPI_ISL_509331, EPI_ISL_509332, EPI_ISL_509333, EPI_ISL_509334, EPI_ISL_509335, EPI_ISL_509336, EPI_ISL_509337, EPI_ISL_509338, EPI_ISL_509339, EPI_ISL_509340, EPI_ISL_509341, EPI_ISL_509342, EPI_ISL_509343, EPI_ISL_509344, EPI_ISL_509345, EPI_ISL_509346, EPI_ISL_509347, EPI_ISL_509348, EPI_ISL_509349, EPI_ISL_509350, EPI_ISL_509351, EPI_ISL_509352, EPI_ISL_509353, EPI_ISL_509354, EPI_ISL_509355, EPI_ISL_509356, EPI_ISL_509357, EPI_ISL_509358, EPI_ISL_509360, EPI_ISL_509361, EPI_ISL_509362, EPI_ISL_509363, EPI_ISL_509364, EPI_ISL_509365, EPI_ISL_509366, EPI_ISL_509367, EPI_ISL_509368, EPI_ISL_509369 | see above | NHLS-IALCH                                                                                             | KRISP, KZN Research Innovation and Sequencing Platform                                                                                                                                                        | Giandhari J, Pillay S, Lessells R, Mdlalose K, York D, Tegally H, Wilkinson E, de Oliveira T                                                                                                                                                                                                                                                                    |
| EPI_ISL_509373, EPI_ISL_509374, EPI_ISL_509375, EPI_ISL_509377, EPI_ISL_509378, EPI_ISL_509379, EPI_ISL_509380, EPI_ISL_509381, EPI_ISL_509382, EPI_ISL_509383, EPI_ISL_509384, EPI_ISL_509385, EPI_ISL_509386, EPI_ISL_509387, EPI_ISL_509388, EPI_ISL_509389, EPI_ISL_509390, EPI_ISL_509391, EPI_ISL_509392, EPI_ISL_509393, EPI_ISL_509394                                                                                                                                                                                                                                                                                                                                                                                                                                                                                                                                                                                                                                                                                                                                                                                                                                                                                                                                                                                                                                                                                                                                                                                                                                                                                                                                                                                                                                                                                                                                                                                                                                                                                                                                                                                                                                                                                                                                                                 | see above | Singapore General Hospital                                                                             | Department of Microbiology                                                                                                                                                                                    | Nurdyana Abdul Rahman, Kun Lee Lim, Chenhao Li, Kian Sing Chan, Lynette Oon, Kern Rei Chng, Niranjani Nagarajan, Karrie Ko                                                                                                                                                                                                                                      |
| EPI_ISL_509416                                                                                                                                                                                                                                                                                                                                                                                                                                                                                                                                                                                                                                                                                                                                                                                                                                                                                                                                                                                                                                                                                                                                                                                                                                                                                                                                                                                                                                                                                                                                                                                                                                                                                                                                                                                                                                                                                                                                                                                                                                                                                                                                                                                                                                                                                                 |           | Acibadem Labcell Cellular Therapy Laboratory                                                           | Acibadem Mehmet Ali Aydinlar University School of Medicine, Medical Genetics Department                                                                                                                       | Ozden Hatirnaz Ng, Sezer Akyonev, Ilayda Sahin, Günseli Bayram Akcapinar, Ozkan Ozdemir, Derya Dilek Kancagi, Gozde Sir Karakus, Bulut Yurtsever, Cihan Tastan, Ercument Ovali, Ugur Ozbek                                                                                                                                                                      |
| EPI_ISL_510689                                                                                                                                                                                                                                                                                                                                                                                                                                                                                                                                                                                                                                                                                                                                                                                                                                                                                                                                                                                                                                                                                                                                                                                                                                                                                                                                                                                                                                                                                                                                                                                                                                                                                                                                                                                                                                                                                                                                                                                                                                                                                                                                                                                                                                                                                                 |           | Hospital Universitari Germans Trias i Pujol(HUGTIP)/Fundació Lluita contra la SIDA (FLSida)/IRTA-CReSA | IrsiCaixa AIDS Research Lab                                                                                                                                                                                   | Pilar Armengol, Marc Noguera-Julian, Jordi Rodón, Julia Vergara, Lidia Ruiz, Nuria Izquierdo, Jorge Carrillo, Roger Paredes, Albert Bensaïd, Julia Blanco, Joaquim Segalés, Bonaventura Clotet                                                                                                                                                                  |
| EPI_ISL_511879                                                                                                                                                                                                                                                                                                                                                                                                                                                                                                                                                                                                                                                                                                                                                                                                                                                                                                                                                                                                                                                                                                                                                                                                                                                                                                                                                                                                                                                                                                                                                                                                                                                                                                                                                                                                                                                                                                                                                                                                                                                                                                                                                                                                                                                                                                 |           | Laboratorium Kesehatan Provinsi Jawa Barat                                                             | Molecular Genetics Laboratory-Faculty of Medicine-Universitas Padjadjaran; School of Life Sciences and Technology & School of Pharmacy-Institut Teknologi Bandung; Laboratorium Kesehatan Provinsi Jawa Barat | Marselina Irasonia Tan, Yunia Sribudiani, Catur Riani, Azzania Fibriani, Husna Nugrahapraja, Tanwadi, Ema Rahmawati, Hesti Lina Wiraswati, Lia Faridah, Savira Ekwardhani, Ryan Bayusantika Ristandi, Rifky Waluyajati Rachman, Cut Nur Cinthia Alamanda, Hammam Riza, Soni Solistia Wirawan, Agung Er Wibowo                                                   |
| EPI_ISL_511891, EPI_ISL_511892, EPI_ISL_511893, EPI_ISL_511894, EPI_ISL_511895, EPI_ISL_511896, EPI_ISL_511897, EPI_ISL_511898                                                                                                                                                                                                                                                                                                                                                                                                                                                                                                                                                                                                                                                                                                                                                                                                                                                                                                                                                                                                                                                                                                                                                                                                                                                                                                                                                                                                                                                                                                                                                                                                                                                                                                                                                                                                                                                                                                                                                                                                                                                                                                                                                                                 |           | National Hospital of Tropical Diseases                                                                 | Oxford University Clinical Research Unit, Hanoi, Vietnam                                                                                                                                                      | Nguyen Thi Tam, Van Dinh Trang, Nguyen Thi Hong Thuong, Vu Thi Ngoc Bich, Nguyen Thu Trang, Nguyen Thi Ngoc Diep, Le Nguyen Minh Hoa, Pham Ngoc Thach, H. Rogier van Doorn, on behalf of the OUCRU COVID-19 research group                                                                                                                                      |
| EPI_ISL_512058                                                                                                                                                                                                                                                                                                                                                                                                                                                                                                                                                                                                                                                                                                                                                                                                                                                                                                                                                                                                                                                                                                                                                                                                                                                                                                                                                                                                                                                                                                                                                                                                                                                                                                                                                                                                                                                                                                                                                                                                                                                                                                                                                                                                                                                                                                 |           | B.J. Medical College and Civil hospital, Ahmedabad                                                     | Gujarat Biotechnology Research Centre                                                                                                                                                                         | Monika Gandhi, Pinal Trivedi, Maharshi Pandya, Nidhi Patel, Nitin Savaliya, Raghawendra Kumar, Dinesh Kumar, Zuber Saiyed, Komal Patel, Labdhi Pandya, Afzal Ansari, Nikha Trivedi, Pranay Shah, Kamlesh J Upadhyay, Sanjay Kapadia, Apurvasinh Puvar, Janvi Raval, Zarna Patel, R D Dixit, A M Kadri, Harsh Bakshi, Chaitanya Joshi, Madhvi Joshi              |
| EPI_ISL_512059                                                                                                                                                                                                                                                                                                                                                                                                                                                                                                                                                                                                                                                                                                                                                                                                                                                                                                                                                                                                                                                                                                                                                                                                                                                                                                                                                                                                                                                                                                                                                                                                                                                                                                                                                                                                                                                                                                                                                                                                                                                                                                                                                                                                                                                                                                 |           | B.J. Medical College and Civil hospital, Ahmedabad                                                     | Gujarat Biotechnology Research Centre                                                                                                                                                                         | Pinal Trivedi, Maharshi Pandya, Nidhi Patel, Nitin Savaliya, Raghawendra Kumar, Dinesh Kumar, Zuber Saiyed, Komal Patel, Labdhi Pandya, Afzal Ansari, Nikha Trivedi, Pranay Shah, Kamlesh J Upadhyay, Sanjay Kapadia, Apurvasinh Puvar, Janvi Raval, Zarna Patel, Monika Gandhi, R D Dixit, A M Kadri, Harsh Bakshi, Chaitanya Joshi, Madhvi Joshi              |
| EPI_ISL_512060                                                                                                                                                                                                                                                                                                                                                                                                                                                                                                                                                                                                                                                                                                                                                                                                                                                                                                                                                                                                                                                                                                                                                                                                                                                                                                                                                                                                                                                                                                                                                                                                                                                                                                                                                                                                                                                                                                                                                                                                                                                                                                                                                                                                                                                                                                 |           | B.J. Medical College and Civil hospital, Ahmedabad                                                     | Gujarat Biotechnology Research Centre                                                                                                                                                                         | Maharshi Pandya, Nidhi Patel, Nitin Savaliya, Raghawendra Kumar, Dinesh Kumar, Zuber Saiyed, Komal Patel, Labdhi Pandya, Afzal Ansari, Nikha Trivedi, Pranay Shah, Kamlesh J Upadhyay, Sanjay Kapadia, Apurvasinh Puvar, Janvi Raval, Zarna Patel, Monika Gandhi, R D Dixit, A M Kadri, Harsh Bakshi, Chaitanya Joshi, Madhvi Joshi                             |
| EPI_ISL_512063                                                                                                                                                                                                                                                                                                                                                                                                                                                                                                                                                                                                                                                                                                                                                                                                                                                                                                                                                                                                                                                                                                                                                                                                                                                                                                                                                                                                                                                                                                                                                                                                                                                                                                                                                                                                                                                                                                                                                                                                                                                                                                                                                                                                                                                                                                 |           | B.J. Medical College and Civil hospital, Ahmedabad                                                     | Gujarat Biotechnology Research Centre                                                                                                                                                                         | Raghawendra Kumar, Dinesh Kumar, Zuber Saiyed, Komal Patel, Labdhi Pandya, Afzal Ansari, Nikha Trivedi, Pranay Shah, Kamlesh J Upadhyay, Sanjay Kapadia, Apurvasinh Puvar, Janvi Raval, Zarna Patel, Monika Gandhi, Pinal Trivedi, Maharshi Pandya, Nidhi Patel, Nitin Savaliya, R D Dixit, A M Kadri, Harsh Bakshi, Chaitanya Joshi, Madhvi Joshi              |
| EPI_ISL_512064                                                                                                                                                                                                                                                                                                                                                                                                                                                                                                                                                                                                                                                                                                                                                                                                                                                                                                                                                                                                                                                                                                                                                                                                                                                                                                                                                                                                                                                                                                                                                                                                                                                                                                                                                                                                                                                                                                                                                                                                                                                                                                                                                                                                                                                                                                 |           | B.J. Medical College and Civil hospital, Ahmedabad                                                     | Gujarat Biotechnology Research Centre                                                                                                                                                                         | Dinesh Kumar, Zuber Saiyed, Komal Patel, Labdhi Pandya, Afzal Ansari, Nikha Trivedi, Pranay Shah, Kamlesh J Upadhyay, Sanjay Kapadia, Apurvasinh Puvar, Janvi Raval, Zarna Patel, Monika Gandhi, Pinal Trivedi, Maharshi Pandya, Nidhi Patel, Nitin Savaliya, Raghawendra Kumar, R D Dixit, A M Kadri, Harsh Bakshi, Chaitanya Joshi, Madhvi Joshi              |
| EPI_ISL_512065                                                                                                                                                                                                                                                                                                                                                                                                                                                                                                                                                                                                                                                                                                                                                                                                                                                                                                                                                                                                                                                                                                                                                                                                                                                                                                                                                                                                                                                                                                                                                                                                                                                                                                                                                                                                                                                                                                                                                                                                                                                                                                                                                                                                                                                                                                 |           | B.J. Medical College and Civil hospital, Ahmedabad                                                     | Gujarat Biotechnology Research Centre                                                                                                                                                                         | Zuber Saiyed, Komal Patel, Labdhi Pandya, Afzal Ansari, Nikha Trivedi, Pranay Shah, Kamlesh J Upadhyay, Sanjay Kapadia, Apurvasinh Puvar, Janvi Raval, Zarna Patel, Monika Gandhi, Pinal Trivedi, Maharshi Pandya, Nidhi Patel, Nitin Savaliya, Raghawendra Kumar, Dinesh Kumar, R D Dixit, A M Kadri, Harsh Bakshi, Chaitanya Joshi, Madhvi Joshi              |
| EPI_ISL_512066                                                                                                                                                                                                                                                                                                                                                                                                                                                                                                                                                                                                                                                                                                                                                                                                                                                                                                                                                                                                                                                                                                                                                                                                                                                                                                                                                                                                                                                                                                                                                                                                                                                                                                                                                                                                                                                                                                                                                                                                                                                                                                                                                                                                                                                                                                 |           | Sardar Vallabhbhai Patel Institute of Medical Sciences & Research                                      | Gujarat Biotechnology Research Centre                                                                                                                                                                         | Komal Patel, Labdhi Pandya, Afzal Ansari, Nikha Trivedi, Pranay Shah, Kamlesh J Upadhyay, Sanjay Kapadia, Apurvasinh Puvar, Janvi Raval, Zarna Patel, Monika Gandhi, Pinal Trivedi, Maharshi Pandya, Nidhi Patel, Nitin Savaliya, Raghawendra Kumar, Dinesh Kumar, Zuber Saiyed, Komal Patel, R D Dixit, A M Kadri, Harsh Bakshi, Chaitanya Joshi, Madhvi Joshi |
| EPI_ISL_512067                                                                                                                                                                                                                                                                                                                                                                                                                                                                                                                                                                                                                                                                                                                                                                                                                                                                                                                                                                                                                                                                                                                                                                                                                                                                                                                                                                                                                                                                                                                                                                                                                                                                                                                                                                                                                                                                                                                                                                                                                                                                                                                                                                                                                                                                                                 |           | Sardar Vallabhbhai Patel Institute of Medical Sciences & Research                                      | Gujarat Biotechnology Research Centre                                                                                                                                                                         | Labdhi Pandya, Afzal Ansari, Nikha Trivedi, Pranay Shah, Kamlesh J Upadhyay, Sanjay Kapadia, Apurvasinh Puvar, Janvi Raval, Zarna Patel, Monika Gandhi, Pinal Trivedi, Maharshi Pandya, Nidhi Patel, Nitin Savaliya, Raghawendra Kumar, Dinesh Kumar, Zuber Saiyed, Komal Patel, R D Dixit, A M Kadri, Harsh Bakshi, Chaitanya Joshi, Madhvi Joshi              |
| EPI_ISL_512068                                                                                                                                                                                                                                                                                                                                                                                                                                                                                                                                                                                                                                                                                                                                                                                                                                                                                                                                                                                                                                                                                                                                                                                                                                                                                                                                                                                                                                                                                                                                                                                                                                                                                                                                                                                                                                                                                                                                                                                                                                                                                                                                                                                                                                                                                                 |           | Sardar Vallabhbhai Patel Institute of Medical Sciences & Research                                      | Gujarat Biotechnology Research Centre                                                                                                                                                                         | Afzal Ansari, Nikha Trivedi, Pranay Shah, Kamlesh J Upadhyay, Sanjay Kapadia, Apurvasinh Puvar, Janvi Raval, Zarna Patel, Monika Gandhi, Pinal Trivedi, Maharshi Pandya, Nidhi Patel, Nitin Savaliya, Raghawendra Kumar, Dinesh Kumar, Zuber Saiyed, Komal Patel, R D Dixit, A M Kadri, Harsh Bakshi, Chaitanya Joshi, Madhvi Joshi                             |
| EPI_ISL_512069                                                                                                                                                                                                                                                                                                                                                                                                                                                                                                                                                                                                                                                                                                                                                                                                                                                                                                                                                                                                                                                                                                                                                                                                                                                                                                                                                                                                                                                                                                                                                                                                                                                                                                                                                                                                                                                                                                                                                                                                                                                                                                                                                                                                                                                                                                 |           | Sardar Vallabhbhai Patel Institute of Medical Sciences & Research                                      | Gujarat Biotechnology Research Centre                                                                                                                                                                         | Nikha Trivedi, Pranay Shah, Kamlesh J Upadhyay, Sanjay Kapadia, Apurvasinh Puvar, Janvi Raval, Zarna Patel, Monika Gandhi, Pinal Trivedi, Maharshi Pandya, Nidhi Patel, Nitin Savaliya, Raghawendra Kumar, Dinesh Kumar, Zuber Saiyed, Komal Patel, Labdhi Pandya, Afzal Ansari, R D Dixit, A M Kadri, Harsh Bakshi, Chaitanya Joshi, Madhvi Joshi              |
| EPI_ISL_512070                                                                                                                                                                                                                                                                                                                                                                                                                                                                                                                                                                                                                                                                                                                                                                                                                                                                                                                                                                                                                                                                                                                                                                                                                                                                                                                                                                                                                                                                                                                                                                                                                                                                                                                                                                                                                                                                                                                                                                                                                                                                                                                                                                                                                                                                                                 |           | Department of Microbiology, Government Medical College, Surat                                          | Gujarat Biotechnology Research Centre                                                                                                                                                                         | Naresh Chauhan, Summaiya Mullan, Amit gamit, Apurvasinh Puvar, Janvi Raval, Zarna Patel, Monika Gandhi, Pinal Trivedi, Maharshi Pandya, Nidhi Patel, Nitin Savaliya, Raghawendra Kumar, Dinesh Kumar, Zuber Saiyed, Komal Patel, Labdhi Pandya, Afzal Ansari, Nikha Trivedi, R D Dixit, A M Kadri, Harsh Bakshi, Chaitanya Joshi, Madhvi Joshi                  |
| EPI_ISL_512071                                                                                                                                                                                                                                                                                                                                                                                                                                                                                                                                                                                                                                                                                                                                                                                                                                                                                                                                                                                                                                                                                                                                                                                                                                                                                                                                                                                                                                                                                                                                                                                                                                                                                                                                                                                                                                                                                                                                                                                                                                                                                                                                                                                                                                                                                                 |           | Department of Microbiology, Government Medical College, Surat                                          | Gujarat Biotechnology Research Centre                                                                                                                                                                         | Summaiya Mullan, Amit gamit, Apurvasinh Puvar, Janvi Raval, Zarna Patel, Monika Gandhi, Pinal Trivedi, Maharshi Pandya, Nidhi Patel, Nitin Savaliya, Raghawendra Kumar, Dinesh Kumar, Zuber Saiyed, Komal Patel, Labdhi Pandya, Afzal Ansari, Nikha Trivedi, Naresh Chauhan, R D Dixit, A M Kadri, Harsh Bakshi, Chaitanya Joshi, Madhvi Joshi                  |
| EPI_ISL_512072                                                                                                                                                                                                                                                                                                                                                                                                                                                                                                                                                                                                                                                                                                                                                                                                                                                                                                                                                                                                                                                                                                                                                                                                                                                                                                                                                                                                                                                                                                                                                                                                                                                                                                                                                                                                                                                                                                                                                                                                                                                                                                                                                                                                                                                                                                 |           | Saikrishna Hospital, Mehsana                                                                           | Gujarat Biotechnology Research Centre                                                                                                                                                                         | Harshadbhai Parmar, Apurvasinh Puvar, Janvi Raval, Zarna Patel, Monika Gandhi, Pinal Trivedi, Maharshi Pandya, Nidhi Patel, Nitin Savaliya, Raghawendra Kumar, Dinesh Kumar, Zuber Saiyed, Komal Patel, Labdhi Pandya, Afzal Ansari, Nikha Trivedi, R D Dixit, A M Kadri, Harsh Bakshi, Chaitanya Joshi, Madhvi Joshi                                           |
| EPI_ISL_512073                                                                                                                                                                                                                                                                                                                                                                                                                                                                                                                                                                                                                                                                                                                                                                                                                                                                                                                                                                                                                                                                                                                                                                                                                                                                                                                                                                                                                                                                                                                                                                                                                                                                                                                                                                                                                                                                                                                                                                                                                                                                                                                                                                                                                                                                                                 |           | Saikrishna Hospital, Mehsana                                                                           | Gujarat Biotechnology Research Centre                                                                                                                                                                         | Apurvasinh Puvar, Janvi Raval, Zarna Patel, Monika Gandhi, Pinal Trivedi, Maharshi Pandya, Nidhi Patel, Nitin Savaliya, Raghawendra Kumar, Dinesh Kumar, Zuber Saiyed, Komal Patel, Labdhi Pandya, Afzal Ansari, Nikha Trivedi, Harshadbhai Parmar, R D Dixit, A M Kadri, Harsh Bakshi, Chaitanya Joshi, Madhvi Joshi                                           |
| EPI_ISL_512074                                                                                                                                                                                                                                                                                                                                                                                                                                                                                                                                                                                                                                                                                                                                                                                                                                                                                                                                                                                                                                                                                                                                                                                                                                                                                                                                                                                                                                                                                                                                                                                                                                                                                                                                                                                                                                                                                                                                                                                                                                                                                                                                                                                                                                                                                                 |           | Saikrishna Hospital, Mehsana                                                                           | Gujarat Biotechnology Research Centre                                                                                                                                                                         | Janvi Raval, Zarna Patel, Monika Gandhi, Pinal Trivedi, Maharshi Pandya, Nidhi Patel, Nitin Savaliya, Raghawendra Kumar, Dinesh Kumar, Zuber Saiyed, Komal Patel, Labdhi Pandya, Afzal Ansari, Nikha Trivedi, Harshadbhai Parmar, Apurvasinh Puvar, R D Dixit, A M Kadri, Harsh Bakshi, Chaitanya Joshi, Madhvi Joshi                                           |
| EPI_ISL_512075                                                                                                                                                                                                                                                                                                                                                                                                                                                                                                                                                                                                                                                                                                                                                                                                                                                                                                                                                                                                                                                                                                                                                                                                                                                                                                                                                                                                                                                                                                                                                                                                                                                                                                                                                                                                                                                                                                                                                                                                                                                                                                                                                                                                                                                                                                 |           | Dr. RSS Hospital, Modasa                                                                               | Gujarat Biotechnology Research Centre                                                                                                                                                                         | Monika Gandhi, Pinal Trivedi, Maharshi Pandya, Nidhi Patel, Nitin Savaliya, Raghawendra Kumar, Dinesh Kumar, Zuber Saiyed, Komal Patel, Labdhi Pandya, Afzal Ansari, Nikha Trivedi, Harsh Chaudhari, Apurvasinh Puvar, Janvi Raval, Zarna Patel, R D Dixit, A M Kadri, Harsh Bakshi, Chaitanya Joshi, Madhvi Joshi                                              |
| EPI_ISL_512076                                                                                                                                                                                                                                                                                                                                                                                                                                                                                                                                                                                                                                                                                                                                                                                                                                                                                                                                                                                                                                                                                                                                                                                                                                                                                                                                                                                                                                                                                                                                                                                                                                                                                                                                                                                                                                                                                                                                                                                                                                                                                                                                                                                                                                                                                                 |           | Dr. RSS Hospital, Modasa                                                                               | Gujarat Biotechnology Research Centre                                                                                                                                                                         | Pinal Trivedi, Maharshi Pandya, Nidhi Patel, Nitin Savaliya, Raghawendra Kumar, Dinesh Kumar, Zuber Saiyed, Komal Patel, Labdhi Pandya, Afzal Ansari, Nikha Trivedi, Harsh Chaudhari, Apurvasinh Puvar, Janvi Raval, Zarna Patel, Monika Gandhi, R D Dixit, A M Kadri, Harsh Bakshi, Chaitanya Joshi, Madhvi Joshi                                              |
| EPI_ISL_512077                                                                                                                                                                                                                                                                                                                                                                                                                                                                                                                                                                                                                                                                                                                                                                                                                                                                                                                                                                                                                                                                                                                                                                                                                                                                                                                                                                                                                                                                                                                                                                                                                                                                                                                                                                                                                                                                                                                                                                                                                                                                                                                                                                                                                                                                                                 |           | Dr. RSS Hospital, Modasa                                                                               | Gujarat Biotechnology Research Centre                                                                                                                                                                         | Maharshi Pandya, Nidhi Patel, Nitin Savaliya, Raghawendra Kumar, Dinesh Kumar, Zuber Saiyed, Komal Patel, Labdhi Pandya, Afzal Ansari, Nikha Trivedi, Harsh Chaudhari, Apurvasinh Puvar, Janvi Raval, Zarna Patel, Monika Gandhi, Pinal Trivedi, R D Dixit, A M Kadri, Harsh Bakshi, Chaitanya Joshi, Madhvi Joshi                                              |
| EPI_ISL_512653                                                                                                                                                                                                                                                                                                                                                                                                                                                                                                                                                                                                                                                                                                                                                                                                                                                                                                                                                                                                                                                                                                                                                                                                                                                                                                                                                                                                                                                                                                                                                                                                                                                                                                                                                                                                                                                                                                                                                                                                                                                                                                                                                                                                                                                                                                 |           | Area De Salud Desamparados 1 - Clinica Dr. Marcial Fallas (Grifo Alto/Desampara                        | Incienza, Instituto Costarricense de Investigación y Enseñanza en Nutrición y Salud                                                                                                                           | Francisco Duarte, Hebleen Porras, Claudio Soto-Garita, Estela Cordero, Adriana Godínez & Melany Calderon                                                                                                                                                                                                                                                        |
| EPI_ISL_512670                                                                                                                                                                                                                                                                                                                                                                                                                                                                                                                                                                                                                                                                                                                                                                                                                                                                                                                                                                                                                                                                                                                                                                                                                                                                                                                                                                                                                                                                                                                                                                                                                                                                                                                                                                                                                                                                                                                                                                                                                                                                                                                                                                                                                                                                                                 |           | Centro Nacional de Rehabilitación Humberto Araya Rojas (Cenare)                                        | Incienza, Instituto Costarricense de Investigación y Enseñanza en Nutrición y Salud                                                                                                                           | Francisco Duarte, Hebleen Porras, Claudio Soto-Garita, Estela Cordero, Adriana Godínez & Melany Calderon                                                                                                                                                                                                                                                        |
| EPI_ISL_512844                                                                                                                                                                                                                                                                                                                                                                                                                                                                                                                                                                                                                                                                                                                                                                                                                                                                                                                                                                                                                                                                                                                                                                                                                                                                                                                                                                                                                                                                                                                                                                                                                                                                                                                                                                                                                                                                                                                                                                                                                                                                                                                                                                                                                                                                                                 |           | Department of Medical Research                                                                         | DMR_Myanmar                                                                                                                                                                                                   | Myat Htut Nyunt, Hnin Ohnmar Soe, Kay Thi Aye, Wah Wah Aung, Yi Yi Kyaw, Aung Kyaw Kyaw, Theingi Win Myat, Phyu Win Ei, Aung Zaw Latt, Nan Aye Thida On, Lai Lai San, Su Mon Htin, Ni Ni Zaw, Htin Lin, Hlaing Myat Thu, Zaw Than Htin                                                                                                                          |
| EPI_ISL_512846                                                                                                                                                                                                                                                                                                                                                                                                                                                                                                                                                                                                                                                                                                                                                                                                                                                                                                                                                                                                                                                                                                                                                                                                                                                                                                                                                                                                                                                                                                                                                                                                                                                                                                                                                                                                                                                                                                                                                                                                                                                                                                                                                                                                                                                                                                 |           | O.J. MORGUE JUDICIAL                                                                                   | Incienza, Instituto Costarricense de Investigación y Enseñanza en Nutrición y Salud                                                                                                                           | Francisco Duarte, Hebleen Porras, Claudio Soto-Garita, Estela Cordero, Adriana Godínez & Melany Calderon                                                                                                                                                                                                                                                        |
| EPI_ISL_512874, EPI_ISL_512875, EPI_ISL_512876, EPI_ISL_512877, EPI_ISL_512878, EPI_ISL_512879, EPI_ISL_512880, EPI_ISL_512881, EPI_ISL_512882, EPI_ISL_512883, EPI_ISL_512884, EPI_ISL_512885, EPI_ISL_512886, EPI_ISL_512887, EPI_ISL_512888, EPI_ISL_512889, EPI_ISL_512900, EPI_ISL_512901, EPI_ISL_512902, EPI_ISL_512903                                                                                                                                                                                                                                                                                                                                                                                                                                                                                                                                                                                                                                                                                                                                                                                                                                                                                                                                                                                                                                                                                                                                                                                                                                                                                                                                                                                                                                                                                                                                                                                                                                                                                                                                                                                                                                                                                                                                                                                 | see above | Pathogen Genomics Lab King Abdullah University of Science and Technology(KAUST)                        | Pathogen Genomics Lab King Abdullah University of Science and Technology(KAUST)                                                                                                                               | Raece Naeeem, Rahul P Salunke, Sharif Hala, Sara Mfarrej, Amit Kumar Subudhi, Fadwa Alofi, Fathia Ben Rached, Afrah Alsomali, Asim Khogeer, Ahmad Bakur Mahmoud, Anwar Hashem, Naif Almontashiri, Arnab Pain                                                                                                                                                    |
| EPI_ISL_512904, EPI_ISL_512905, EPI_ISL_512906, EPI_ISL_512907                                                                                                                                                                                                                                                                                                                                                                                                                                                                                                                                                                                                                                                                                                                                                                                                                                                                                                                                                                                                                                                                                                                                                                                                                                                                                                                                                                                                                                                                                                                                                                                                                                                                                                                                                                                                                                                                                                                                                                                                                                                                                                                                                                                                                                                 |           | Pathogen Genomics Lab King Abdullah University of Science and Technology(KAUST)                        | Pathogen Genomics Lab King Abdullah University of Science and Technology(KAUST)                                                                                                                               | Fathia Ben Rached, Raece Naeeem, Sharif Hala, Fadwa Alofi, Rahul P Salunke, Sara Mfarrej, Amit Kumar Subudhi, Afrah Alsomali, Asim Khogeer, Ahmad Bakur Mahmoud, Anwar Hashem, Naif Almontashiri, Arnab Pain                                                                                                                                                    |
| EPI_ISL_512908, EPI_ISL_512909, EPI_ISL_512911, EPI_ISL_512912, EPI_ISL_512913, EPI_ISL_512914, EPI_ISL_512915, EPI_ISL_512916, EPI_ISL_512917                                                                                                                                                                                                                                                                                                                                                                                                                                                                                                                                                                                                                                                                                                                                                                                                                                                                                                                                                                                                                                                                                                                                                                                                                                                                                                                                                                                                                                                                                                                                                                                                                                                                                                                                                                                                                                                                                                                                                                                                                                                                                                                                                                 |           | Pathogen Genomics Lab King Abdullah University of Science and Technology(KAUST)                        | Pathogen Genomics Lab King Abdullah University of Science and Technology(KAUST)                                                                                                                               | Sharif Hala, Fadwa Alofi, Sara Mfarrej, Amit Kumar Subudhi, Rahul P Salunke, Fathia Ben Rached, Amanda Ooi, Luke Esau, Afrah Alsomali, Asim Khogeer, Jumana Taha, Abdulaziz Alahmadi, Kahled Alqithami, Raece Naeeem, Anwar Hashem, Naif Almontashiri, Arnab Pain                                                                                               |
| EPI_ISL_512918, EPI_ISL_512919, EPI_ISL_512920, EPI_ISL_512921, EPI_ISL_512922, EPI_ISL_512923, EPI_ISL_512924, EPI_ISL_512926, EPI_ISL_512927, EPI_ISL_512928, EPI_ISL_512929, EPI_ISL_512930, EPI_ISL_512931, EPI_ISL_512932, EPI_ISL_512933, EPI_ISL_512934, EPI_ISL_512935, EPI_ISL_512936, EPI_ISL_512937, EPI_ISL_512938, EPI_ISL_512939, EPI_ISL_512941, EPI_ISL_512942, EPI_ISL_512943, EPI_ISL_512944, EPI_ISL_512945                                                                                                                                                                                                                                                                                                                                                                                                                                                                                                                                                                                                                                                                                                                                                                                                                                                                                                                                                                                                                                                                                                                                                                                                                                                                                                                                                                                                                                                                                                                                                                                                                                                                                                                                                                                                                                                                                 | see above | Pathogen Genomics Lab King Abdullah University of Science and Technology(KAUST)                        | Pathogen Genomics Lab King Abdullah University of Science and Technology(KAUST)                                                                                                                               | Fadwa Alofi, Sharif Hala, Rahul P Salunke, Sara Mfarrej, Amit Kumar Subudhi, Fathia Ben Rached, Amanda, Luke, Afrah Alsomali, Asim Khogeer, Jumana Taha, Abdulaziz Alahmadi, Kahled Alqithami, Raece Naeeem, Anwar Hashem, Naif Almontashiri, Arnab Pain                                                                                                        |
| EPI_ISL_512946, EPI_ISL_512947, EPI_ISL_512948, EPI_ISL_512949, EPI_ISL_512950, EPI_ISL_512951, EPI_ISL_512952, EPI_ISL_512953, EPI_ISL_512954, EPI_ISL_512955, EPI_ISL_512956, EPI_ISL_512957, EPI_ISL_512959, EPI_ISL_512963, EPI_ISL_512964, EPI_ISL_512966, EPI_ISL_512967, EPI_ISL_512969, EPI_ISL_512970, EPI_ISL_512971, EPI_ISL_512973, EPI_ISL_512974, EPI_ISL_512975, EPI_ISL_512976, EPI_ISL_512977, EPI_ISL_512979, EPI_ISL_512980, EPI_ISL_512981, EPI_ISL_512982, EPI_ISL_512983, EPI_ISL_512984, EPI_ISL_512986, EPI_ISL_512987, EPI_ISL_512988                                                                                                                                                                                                                                                                                                                                                                                                                                                                                                                                                                                                                                                                                                                                                                                                                                                                                                                                                                                                                                                                                                                                                                                                                                                                                                                                                                                                                                                                                                                                                                                                                                                                                                                                                 | see above | Pathogen Genomics Lab King Abdullah University of Science and Technology(KAUST)                        | Pathogen Genomics Lab King Abdullah University of Science and Technology(KAUST)                                                                                                                               | Sara Mfarrej, Raece Naeeem, Rahul P Salunke, Sharif Hala, Fadwa Alofi, Amit Kumar Subudhi, Fathia Ben Rached, Afrah Alsomali, Jumana Taha, Abdulaziz Alahmadi, Asim Khogeer, Naishwa Al-khotani, Anwar Hashem, Naif Almontashiri, Arnab Pain                                                                                                                    |
| EPI_ISL_512989, EPI_ISL_512990, EPI_ISL_512991, EPI_ISL_512992, EPI_ISL_512993, EPI_ISL_512994, EPI_ISL_512995, EPI_ISL_512996, EPI_ISL_512997, EPI_ISL_512998, EPI_ISL_512999, EPI_ISL_513000, EPI_ISL_513001                                                                                                                                                                                                                                                                                                                                                                                                                                                                                                                                                                                                                                                                                                                                                                                                                                                                                                                                                                                                                                                                                                                                                                                                                                                                                                                                                                                                                                                                                                                                                                                                                                                                                                                                                                                                                                                                                                                                                                                                                                                                                                 | see above | Pathogen Genomics Lab King Abdullah University of Science and Technology(KAUST)                        | Pathogen Genomics Lab King Abdullah University of Science and Technology(KAUST)                                                                                                                               | Amit Kumar Subudhi, Rahul P Salunke, Sara Mfarrej, Sharif Hala, Fadwa Alofi, Fathia Ben Rached, Afrah Alsomali, Asim Khogeer, Naishwa Al-khotani, Raece Naeeem, Anwar Hashem, Naif Almontashiri, Arnab Pain                                                                                                                                                     |
| EPI_ISL_513002, EPI_ISL_513003, EPI_ISL_513004, EPI_ISL_513005, EPI_ISL_513006, EPI_ISL_513008, EPI_ISL_513009, EPI_ISL_513010, EPI_ISL_513012, EPI_ISL_513013, EPI_ISL_513014, EPI_ISL_513015, EPI_ISL_513016, EPI_ISL_513017, EPI_ISL_513018, EPI_ISL_513019, EPI_ISL_513020, EPI_ISL_513021, EPI_ISL_513022, EPI_ISL_513023, EPI_ISL_513024, EPI_ISL_513025, EPI_ISL_513026                                                                                                                                                                                                                                                                                                                                                                                                                                                                                                                                                                                                                                                                                                                                                                                                                                                                                                                                                                                                                                                                                                                                                                                                                                                                                                                                                                                                                                                                                                                                                                                                                                                                                                                                                                                                                                                                                                                                 |           |                                                                                                        |                                                                                                                                                                                                               |                                                                                                                                                                                                                                                                                                                                                                 |

|                                                                                                                                                                                                                                                                                                                                                                                                                                                                                                                                                                                                                                                                                                                                                                                                                                                                                                                                                                                                                |                                                                                                                     |                                                                                 |                                                                                                                                                                                                                                                                                                                                                                                                                                                                                                                                                                   |
|----------------------------------------------------------------------------------------------------------------------------------------------------------------------------------------------------------------------------------------------------------------------------------------------------------------------------------------------------------------------------------------------------------------------------------------------------------------------------------------------------------------------------------------------------------------------------------------------------------------------------------------------------------------------------------------------------------------------------------------------------------------------------------------------------------------------------------------------------------------------------------------------------------------------------------------------------------------------------------------------------------------|---------------------------------------------------------------------------------------------------------------------|---------------------------------------------------------------------------------|-------------------------------------------------------------------------------------------------------------------------------------------------------------------------------------------------------------------------------------------------------------------------------------------------------------------------------------------------------------------------------------------------------------------------------------------------------------------------------------------------------------------------------------------------------------------|
| see above                                                                                                                                                                                                                                                                                                                                                                                                                                                                                                                                                                                                                                                                                                                                                                                                                                                                                                                                                                                                      | Pathogen Genomics Lab King Abdullah University of Science and Technology(KAUST)                                     | Pathogen Genomics Lab King Abdullah University of Science and Technology(KAUST) | Afrah Alsomali, Fathia Ben Rached, Raece Naem, Sharif Hala,Rahul P Salunke, Amanda Ooi, Luke Esau, Sara Mfarrej, Amit Kumar Subudhi, Fadwa Alofi, Asim Khogeer, Kahled Alghithami, Anwar Hashem, Naif Almontashiri, Arnab Pain                                                                                                                                                                                                                                                                                                                                    |
| EPI_ISL_513027, EPI_ISL_513028, EPI_ISL_513029, EPI_ISL_513032, EPI_ISL_513033, EPI_ISL_513034, EPI_ISL_513035, EPI_ISL_513036, EPI_ISL_513057, EPI_ISL_513058, EPI_ISL_513059, EPI_ISL_513060, EPI_ISL_513061, EPI_ISL_513062, EPI_ISL_513063                                                                                                                                                                                                                                                                                                                                                                                                                                                                                                                                                                                                                                                                                                                                                                 | Pathogen Genomics Lab King Abdullah University of Science and Technology(KAUST)                                     | Pathogen Genomics Lab King Abdullah University of Science and Technology(KAUST) | Rahul P Salunke, Sharif Hala, Raece Naem, Sara Mfarrej, Amit Kumar Subudhi, Amanda Ooi, Luke Esau, Fadwa Alofi, Fathia Ben Rached, Afrah Alsomali, Asim Khogeer, Ahmad Bakur Mahmoud, Anwar Hashem, Naif Almontashiri, Arnab Pain                                                                                                                                                                                                                                                                                                                                 |
| see above                                                                                                                                                                                                                                                                                                                                                                                                                                                                                                                                                                                                                                                                                                                                                                                                                                                                                                                                                                                                      | Pathogen Genomics Lab King Abdullah University of Science and Technology(KAUST)                                     | Pathogen Genomics Lab King Abdullah University of Science and Technology(KAUST) | Raece Naem, Rahul P Salunke, Sharif Hala, Sara Mfarrej, Amit Kumar Subudhi, Fadwa Alofi, Fathia Ben Rached, Afrah Alsomali, Asim Khogeer, Ahmad Bakur Mahmoud, Anwar Hashem, Naif Almontashiri, Arnab Pain                                                                                                                                                                                                                                                                                                                                                        |
| EPI_ISL_513064, EPI_ISL_513065, EPI_ISL_513066, EPI_ISL_513067, EPI_ISL_513069, EPI_ISL_513070, EPI_ISL_513071, EPI_ISL_513072, EPI_ISL_513073, EPI_ISL_513074, EPI_ISL_513075, EPI_ISL_513076                                                                                                                                                                                                                                                                                                                                                                                                                                                                                                                                                                                                                                                                                                                                                                                                                 | Pathogen Genomics Lab King Abdullah University of Science and Technology(KAUST)                                     | Pathogen Genomics Lab King Abdullah University of Science and Technology(KAUST) | Raece Naem, Rahul P Salunke, Sharif Hala, Sara Mfarrej, Amit Kumar Subudhi, Fadwa Alofi, Fathia Ben Rached, Afrah Alsomali, Asim Khogeer, Ahmad Bakur Mahmoud, Anwar Hashem, Naif Almontashiri, Arnab Pain                                                                                                                                                                                                                                                                                                                                                        |
| see above                                                                                                                                                                                                                                                                                                                                                                                                                                                                                                                                                                                                                                                                                                                                                                                                                                                                                                                                                                                                      | Pathogen Genomics Lab King Abdullah University of Science and Technology(KAUST)                                     | Pathogen Genomics Lab King Abdullah University of Science and Technology(KAUST) | Fathia Ben Rached, Raece Naem, Sharif Hala, Fadwa Alofi, Rahul P Salunke, Sara Mfarrej, Amit Kumar Subudhi, Afrah Alsomali, Asim Khogeer, Ahmad Bakur Mahmoud, Anwar Hashem, Naif Almontashiri, Arnab Pain                                                                                                                                                                                                                                                                                                                                                        |
| EPI_ISL_513078, EPI_ISL_513079, EPI_ISL_513081, EPI_ISL_513082, EPI_ISL_513083, EPI_ISL_513086, EPI_ISL_513087, EPI_ISL_513089, EPI_ISL_513090, EPI_ISL_513092, EPI_ISL_513093, EPI_ISL_513094, EPI_ISL_513095, EPI_ISL_513096, EPI_ISL_513097, EPI_ISL_513098, EPI_ISL_513099, EPI_ISL_513100, EPI_ISL_513101, EPI_ISL_513102, EPI_ISL_513103, EPI_ISL_513104, EPI_ISL_513105, EPI_ISL_513106, EPI_ISL_513107, EPI_ISL_513108, EPI_ISL_513109, EPI_ISL_513111, EPI_ISL_513112, EPI_ISL_513113, EPI_ISL_513114, EPI_ISL_513115, EPI_ISL_513116, EPI_ISL_513117, EPI_ISL_513118, EPI_ISL_513119, EPI_ISL_513120                                                                                                                                                                                                                                                                                                                                                                                                 | Pathogen Genomics Lab King Abdullah University of Science and Technology(KAUST)                                     | Pathogen Genomics Lab King Abdullah University of Science and Technology(KAUST) | Sharif Hala, Fadwa Alofi, Sara Mfarrej, Amit Kumar Subudhi, Rahul P Salunke, Sara Mfarrej, Sharif Hala, Fadwa Alofi, Fathia Ben Rached, Afrah Alsomali, Asim Khogeer, Jumana Taha, Abdulaziz Alahmadi, Kahled Alghithami, Raece Naem, Anwar Hashem, Naif Almontashiri, Arnab Pain                                                                                                                                                                                                                                                                                 |
| see above                                                                                                                                                                                                                                                                                                                                                                                                                                                                                                                                                                                                                                                                                                                                                                                                                                                                                                                                                                                                      | Pathogen Genomics Lab King Abdullah University of Science and Technology(KAUST)                                     | Pathogen Genomics Lab King Abdullah University of Science and Technology(KAUST) | Fadwa Alofi, Sharif Hala, Rahul P Salunke, Sara Mfarrej, Amit Kumar Subudhi, Fathia Ben Rached, Amanda, Luke, Afrah Alsomali, Asim Khogeer, Jumana Taha, Abdulaziz Alahmadi, Kahled Alghithami, Raece Naem, Anwar Hashem, Naif Almontashiri, Arnab Pain                                                                                                                                                                                                                                                                                                           |
| EPI_ISL_513122, EPI_ISL_513123, EPI_ISL_513124, EPI_ISL_513125, EPI_ISL_513126, EPI_ISL_513127, EPI_ISL_513128, EPI_ISL_513129, EPI_ISL_513131, EPI_ISL_513132, EPI_ISL_513133, EPI_ISL_513134, EPI_ISL_513135, EPI_ISL_513137, EPI_ISL_513138, EPI_ISL_513139, EPI_ISL_513141, EPI_ISL_513142, EPI_ISL_513143, EPI_ISL_513144, EPI_ISL_513145, EPI_ISL_513146                                                                                                                                                                                                                                                                                                                                                                                                                                                                                                                                                                                                                                                 | Pathogen Genomics Lab King Abdullah University of Science and Technology(KAUST)                                     | Pathogen Genomics Lab King Abdullah University of Science and Technology(KAUST) | Sara Mfarrej, Raece Naem, Rahul P Salunke, Sharif Hala, Fadwa Alofi, Amit Kumar Subudhi, Fathia Ben Rached, Afrah Alsomali, Asim Khogeer, Jumana Taha, Abdulaziz Alahmadi, Kahled Alghithami, Raece Naem, Anwar Hashem, Naif Almontashiri, Arnab Pain                                                                                                                                                                                                                                                                                                             |
| see above                                                                                                                                                                                                                                                                                                                                                                                                                                                                                                                                                                                                                                                                                                                                                                                                                                                                                                                                                                                                      | Pathogen Genomics Lab King Abdullah University of Science and Technology(KAUST)                                     | Pathogen Genomics Lab King Abdullah University of Science and Technology(KAUST) | Fadwa Alofi, Sharif Hala, Rahul P Salunke, Sara Mfarrej, Amit Kumar Subudhi, Fathia Ben Rached, Amanda, Luke, Afrah Alsomali, Asim Khogeer, Jumana Taha, Abdulaziz Alahmadi, Kahled Alghithami, Raece Naem, Anwar Hashem, Naif Almontashiri, Arnab Pain                                                                                                                                                                                                                                                                                                           |
| EPI_ISL_513168, EPI_ISL_513169, EPI_ISL_513170, EPI_ISL_513171, EPI_ISL_513172, EPI_ISL_513173, EPI_ISL_513174                                                                                                                                                                                                                                                                                                                                                                                                                                                                                                                                                                                                                                                                                                                                                                                                                                                                                                 | Pathogen Genomics Lab King Abdullah University of Science and Technology(KAUST)                                     | Pathogen Genomics Lab King Abdullah University of Science and Technology(KAUST) | Sara Mfarrej, Raece Naem, Rahul P Salunke, Sharif Hala, Fadwa Alofi, Amit Kumar Subudhi, Fathia Ben Rached, Afrah Alsomali, Jumana Taha, Abdulaziz Alahmadi, Asim Khogeer, Nashwa Al-khotani, Anwar Hashem, Naif Almontashiri, Arnab Pain                                                                                                                                                                                                                                                                                                                         |
| EPI_ISL_513175, EPI_ISL_513176, EPI_ISL_513177, EPI_ISL_513178, EPI_ISL_513179, EPI_ISL_513180, EPI_ISL_513181, EPI_ISL_513182, EPI_ISL_513183, EPI_ISL_513184, EPI_ISL_513185, EPI_ISL_513186, EPI_ISL_513187, EPI_ISL_513188, EPI_ISL_513189                                                                                                                                                                                                                                                                                                                                                                                                                                                                                                                                                                                                                                                                                                                                                                 | Pathogen Genomics Lab King Abdullah University of Science and Technology(KAUST)                                     | Pathogen Genomics Lab King Abdullah University of Science and Technology(KAUST) | Amit Kumar Subudhi, Rahul P Salunke, Sara Mfarrej, Sharif Hala, Fadwa Alofi, Fathia Ben Rached, Afrah Alsomali, Asim Khogeer, Nashwa Al-khotani, Raece Naem, Anwar Hashem, Naif Almontashiri, Arnab Pain                                                                                                                                                                                                                                                                                                                                                          |
| see above                                                                                                                                                                                                                                                                                                                                                                                                                                                                                                                                                                                                                                                                                                                                                                                                                                                                                                                                                                                                      | Pathogen Genomics Lab King Abdullah University of Science and Technology(KAUST)                                     | Pathogen Genomics Lab King Abdullah University of Science and Technology(KAUST) | Afrah Alsomali, Fathia Ben Rached, Raece Naem, Sharif Hala,Rahul P Salunke, Amanda Ooi, Luke Esau, Sara Mfarrej, Amit Kumar Subudhi, Fadwa Alofi, Asim Khogeer, Kahled Alghithami, Anwar Hashem, Naif Almontashiri, Arnab Pain                                                                                                                                                                                                                                                                                                                                    |
| EPI_ISL_513190, EPI_ISL_513191, EPI_ISL_513192, EPI_ISL_513193, EPI_ISL_513194, EPI_ISL_513195, EPI_ISL_513196, EPI_ISL_513197                                                                                                                                                                                                                                                                                                                                                                                                                                                                                                                                                                                                                                                                                                                                                                                                                                                                                 | Pathogen Genomics Lab King Abdullah University of Science and Technology(KAUST)                                     | Pathogen Genomics Lab King Abdullah University of Science and Technology(KAUST) | Rahul P Salunke, Sharif Hala, Raece Naem, Sara Mfarrej, Amit Kumar Subudhi, Amanda Ooi, Luke Esau, Fadwa Alofi, Fathia Ben Rached, Afrah Alsomali, Asim Khogeer, Ahmad Bakur Mahmoud, Anwar Hashem, Naif Almontashiri, Arnab Pain                                                                                                                                                                                                                                                                                                                                 |
| EPI_ISL_513198, EPI_ISL_513199, EPI_ISL_513200, EPI_ISL_513201, EPI_ISL_513202, EPI_ISL_513203, EPI_ISL_513204, EPI_ISL_513205, EPI_ISL_513206, EPI_ISL_513207                                                                                                                                                                                                                                                                                                                                                                                                                                                                                                                                                                                                                                                                                                                                                                                                                                                 | Pathogen Genomics Lab King Abdullah University of Science and Technology(KAUST)                                     | Pathogen Genomics Lab King Abdullah University of Science and Technology(KAUST) | Raece Naem, Rahul P Salunke, Sharif Hala, Sara Mfarrej, Amit Kumar Subudhi, Fadwa Alofi, Fathia Ben Rached, Afrah Alsomali, Asim Khogeer, Ahmad Bakur Mahmoud, Anwar Hashem, Naif Almontashiri, Arnab Pain                                                                                                                                                                                                                                                                                                                                                        |
| EPI_ISL_513208, EPI_ISL_513209, EPI_ISL_513210, EPI_ISL_513211, EPI_ISL_513212                                                                                                                                                                                                                                                                                                                                                                                                                                                                                                                                                                                                                                                                                                                                                                                                                                                                                                                                 | Pathogen Genomics Lab King Abdullah University of Science and Technology(KAUST)                                     | Pathogen Genomics Lab King Abdullah University of Science and Technology(KAUST) | Sharif Hala, Fadwa Alofi, Sara Mfarrej, Amit Kumar Subudhi, Rahul P Salunke, Fathia Ben Rached, Amanda Ooi, Luke Esau, Afrah Alsomali, Asim Khogeer, Jumana Taha, Abdulaziz Alahmadi, Kahled Alghithami, Raece Naem, Anwar Hashem, Naif Almontashiri, Arnab Pain                                                                                                                                                                                                                                                                                                  |
| EPI_ISL_513214, EPI_ISL_513215, EPI_ISL_513216, EPI_ISL_513217, EPI_ISL_513218, EPI_ISL_513219, EPI_ISL_513221, EPI_ISL_513222, EPI_ISL_513224, EPI_ISL_513226                                                                                                                                                                                                                                                                                                                                                                                                                                                                                                                                                                                                                                                                                                                                                                                                                                                 | Pathogen Genomics Lab King Abdullah University of Science and Technology(KAUST)                                     | Pathogen Genomics Lab King Abdullah University of Science and Technology(KAUST) | Amit Kumar Subudhi, Rahul P Salunke, Sara Mfarrej, Sharif Hala, Fadwa Alofi, Fathia Ben Rached, Afrah Alsomali, Asim Khogeer, Nashwa Al-khotani, Raece Naem, Anwar Hashem, Naif Almontashiri, Arnab Pain                                                                                                                                                                                                                                                                                                                                                          |
| EPI_ISL_513228, EPI_ISL_513229, EPI_ISL_513230, EPI_ISL_513231, EPI_ISL_513233, EPI_ISL_513234, EPI_ISL_513235, EPI_ISL_513236, EPI_ISL_513238, EPI_ISL_513240, EPI_ISL_513241, EPI_ISL_513242, EPI_ISL_513243, EPI_ISL_513244, EPI_ISL_513245, EPI_ISL_513246, EPI_ISL_513247, EPI_ISL_513248                                                                                                                                                                                                                                                                                                                                                                                                                                                                                                                                                                                                                                                                                                                 | Pathogen Genomics Lab King Abdullah University of Science and Technology(KAUST)                                     | Pathogen Genomics Lab King Abdullah University of Science and Technology(KAUST) | Afrah Alsomali, Fathia Ben Rached, Raece Naem, Sharif Hala,Rahul P Salunke, Amanda Ooi, Luke Esau, Sara Mfarrej, Amit Kumar Subudhi, Fadwa Alofi, Asim Khogeer, Kahled Alghithami, Anwar Hashem, Naif Almontashiri, Arnab Pain                                                                                                                                                                                                                                                                                                                                    |
| see above                                                                                                                                                                                                                                                                                                                                                                                                                                                                                                                                                                                                                                                                                                                                                                                                                                                                                                                                                                                                      | Pathogen Genomics Lab King Abdullah University of Science and Technology(KAUST)                                     | Pathogen Genomics Lab King Abdullah University of Science and Technology(KAUST) | Nagy,AjJirincova,H,Novakova,L,Tmka,D,Vecserova J                                                                                                                                                                                                                                                                                                                                                                                                                                                                                                                  |
| EPI_ISL_513249, EPI_ISL_513250, EPI_ISL_513251, EPI_ISL_513252, EPI_ISL_513253, EPI_ISL_513254, EPI_ISL_513257, EPI_ISL_513258, EPI_ISL_513259, EPI_ISL_513260, EPI_ISL_513261, EPI_ISL_513262, EPI_ISL_513263, EPI_ISL_513264                                                                                                                                                                                                                                                                                                                                                                                                                                                                                                                                                                                                                                                                                                                                                                                 | Pathogen Genomics Lab King Abdullah University of Science and Technology(KAUST)                                     | Pathogen Genomics Lab King Abdullah University of Science and Technology(KAUST) | Juliana D. Siqueira, Livia R. Goes, Brunna M. Alves, Claudia Cicala,James Arthos, João P.B. Viola, Andreia C. de Melo, Marcelo A. Soares                                                                                                                                                                                                                                                                                                                                                                                                                          |
| EPI_ISL_513314, EPI_ISL_513511, EPI_ISL_513512                                                                                                                                                                                                                                                                                                                                                                                                                                                                                                                                                                                                                                                                                                                                                                                                                                                                                                                                                                 | The National Institute of Public Health                                                                             | The National Institute of Public Health and State Veterinary Institute Prague   | Luan Felipe Botelho-Souza, Felipe Souza Nogueira-Lima, Tárccio Peixoto Roca, Alcione de Oliveira dos Santos, Felipe Gomes Naveca, Adriana Cristina Salvador Maia, Cicileia Correia da Silva, Aline Linhares Ferreira de Melo Mendonça, Celina Aparecida Bertoni Lugtenburg, Camila Flávia Gomes Azzi, Juliana Loca Furtado, Suelen Cavalcante, Rita de Cássia Pontello Rampazzo, Caio Henrique Nemeth Santos, Alice Paula Di Sabatino Guimarães, Jansen Fernandes de Medeiros, Fernando Rodrigues Máximo, Juan Miguel Viallobos-Salcedo and Deuilene Souza Vieira |
| EPI_ISL_513513, EPI_ISL_513514, EPI_ISL_513515, EPI_ISL_513518, EPI_ISL_513519, EPI_ISL_513520, EPI_ISL_513521, EPI_ISL_513522, EPI_ISL_513524, EPI_ISL_513525, EPI_ISL_513526, EPI_ISL_513527, EPI_ISL_513529, EPI_ISL_513530, EPI_ISL_513531, EPI_ISL_513532, EPI_ISL_513533, EPI_ISL_513534, EPI_ISL_513535, EPI_ISL_513536, EPI_ISL_513537, EPI_ISL_513538, EPI_ISL_513539, EPI_ISL_513540, EPI_ISL_513541, EPI_ISL_513542, EPI_ISL_513543, EPI_ISL_513544, EPI_ISL_513545, EPI_ISL_513546, EPI_ISL_513547, EPI_ISL_513548, EPI_ISL_513549, EPI_ISL_513550, EPI_ISL_513551, EPI_ISL_513552, EPI_ISL_513553, EPI_ISL_513556, EPI_ISL_513557, EPI_ISL_513558, EPI_ISL_513559, EPI_ISL_513560, EPI_ISL_513561, EPI_ISL_513562, EPI_ISL_513563, EPI_ISL_513564, EPI_ISL_513567, EPI_ISL_513568, EPI_ISL_513571, EPI_ISL_513572, EPI_ISL_513573, EPI_ISL_513574, EPI_ISL_513575, EPI_ISL_513576, EPI_ISL_513577, EPI_ISL_513578, EPI_ISL_513579, EPI_ISL_513580, EPI_ISL_513581, EPI_ISL_513582, EPI_ISL_513583 | Programa de Oncovirologia, Instituto Nacional de Câncer                                                             | Programa de Oncovirologia, Instituto Nacional de Câncer                         | Luan Felipe Botelho-Souza, Felipe Souza Nogueira-Lima, Tárccio Peixoto Roca, Alcione de Oliveira dos Santos, Felipe Gomes Naveca, Adriana Cristina Salvador Maia, Cicileia Correia da Silva, Aline Linhares Ferreira de Melo Mendonça, Celina Aparecida Bertoni Lugtenburg, Camila Flávia Gomes Azzi, Juliana Loca Furtado, Suelen Cavalcante, Rita de Cássia Pontello Rampazzo, Caio Henrique Nemeth Santos, Alice Paula Di Sabatino Guimarães, Jansen Fernandes de Medeiros, Fernando Rodrigues Máximo, Juan Miguel Viallobos-Salcedo and Deuilene Souza Vieira |
| EPI_ISL_514131                                                                                                                                                                                                                                                                                                                                                                                                                                                                                                                                                                                                                                                                                                                                                                                                                                                                                                                                                                                                 | Rondônia Central Public Health Laboratory (LACEN/RO), vinculated to State Health Secretariat of Rondônia (SESAU/RO) | Molecular Virology Laboratory of Oswaldo Cruz Foundation of Rondônia            | Luan Felipe Botelho-Souza, Felipe Souza Nogueira-Lima, Tárccio Peixoto Roca, Alcione de Oliveira dos Santos, Felipe Gomes Naveca, Adriana Cristina Salvador Maia, Cicileia Correia da Silva, Aline Linhares Ferreira de Melo Mendonça, Celina Aparecida Bertoni Lugtenburg, Camila Flávia Gomes Azzi, Juliana Loca Furtado, Suelen Cavalcante, Rita de Cássia Pontello Rampazzo, Caio Henrique Nemeth Santos, Alice Paula Di Sabatino Guimarães, Jansen Fernandes de Medeiros, Fernando Rodrigues Máximo, Juan Miguel Viallobos-Salcedo and Deuilene Souza Vieira |
| EPI_ISL_514132                                                                                                                                                                                                                                                                                                                                                                                                                                                                                                                                                                                                                                                                                                                                                                                                                                                                                                                                                                                                 | Rondônia Central Public Health Laboratory (LACEN/RO), vinculated to State Health Secretariat of Rondônia (SESAU/RO) | Molecular Virology Laboratory of Oswaldo Cruz Foundation of Rondônia            | Luan Felipe Botelho-Souza, Felipe Souza Nogueira-Lima, Tárccio Peixoto Roca, Alcione de Oliveira dos Santos, Felipe Gomes Naveca, Adriana Cristina Salvador Maia, Cicileia Correia da Silva, Aline Linhares Ferreira de Melo Mendonça, Celina Aparecida Bertoni Lugtenburg, Camila Flávia Gomes Azzi, Juliana Loca Furtado, Suelen Cavalcante, Rita de Cássia Pontello Rampazzo, Caio Henrique Nemeth Santos, Alice Paula Di Sabatino Guimarães, Jansen Fernandes de Medeiros, Fernando Rodrigues Máximo, Juan Miguel Viallobos-Salcedo and Deuilene Souza Vieira |
| EPI_ISL_514133, EPI_ISL_514134                                                                                                                                                                                                                                                                                                                                                                                                                                                                                                                                                                                                                                                                                                                                                                                                                                                                                                                                                                                 | Rondônia Central Public Health Laboratory (LACEN/RO), vinculated to State Health Secretariat of Rondônia (SESAU/RO) | Molecular Virology Laboratory of Oswaldo Cruz Foundation of Rondônia            | Luan Felipe Botelho-Souza, Felipe Souza Nogueira-Lima, Tárccio Peixoto Roca, Alcione de Oliveira dos Santos, Felipe Gomes Naveca, Adriana Cristina Salvador Maia, Cicileia Correia da Silva, Aline Linhares Ferreira de Melo Mendonça, Celina Aparecida Bertoni Lugtenburg, Camila Flávia Gomes Azzi, Juliana Loca Furtado, Suelen Cavalcante, Rita de Cássia Pontello Rampazzo, Caio Henrique Nemeth Santos, Alice Paula Di Sabatino Guimarães, Jansen Fernandes de Medeiros, Fernando Rodrigues Máximo, Juan Miguel Viallobos-Salcedo and Deuilene Souza Vieira |
| EPI_ISL_514135                                                                                                                                                                                                                                                                                                                                                                                                                                                                                                                                                                                                                                                                                                                                                                                                                                                                                                                                                                                                 | Rondônia Central Public Health Laboratory (LACEN/RO), vinculated to State Health Secretariat of Rondônia (SESAU/RO) | Molecular Virology Laboratory of Oswaldo Cruz Foundation of Rondônia            | Luan Felipe Botelho-Souza, Felipe Souza Nogueira-Lima, Tárccio Peixoto Roca, Alcione de Oliveira dos Santos, Felipe Gomes Naveca, Adriana Cristina Salvador Maia, Cicileia Correia da Silva, Aline Linhares Ferreira de Melo Mendonça, Celina Aparecida Bertoni Lugtenburg, Camila Flávia Gomes Azzi, Juliana Loca Furtado, Suelen Cavalcante, Rita de Cássia Pontello Rampazzo, Caio Henrique Nemeth Santos, Alice Paula Di Sabatino Guimarães, Jansen Fernandes de Medeiros, Fernando Rodrigues Máximo, Juan Miguel Viallobos-Salcedo and Deuilene Souza Vieira |
| EPI_ISL_514136                                                                                                                                                                                                                                                                                                                                                                                                                                                                                                                                                                                                                                                                                                                                                                                                                                                                                                                                                                                                 | Rondônia Central Public Health Laboratory (LACEN/RO), vinculated to State Health Secretariat of Rondônia (SESAU/RO) | Molecular Virology Laboratory of Oswaldo Cruz Foundation of Rondônia            | Luan Felipe Botelho-Souza, Felipe Souza Nogueira-Lima, Tárccio Peixoto Roca, Alcione de Oliveira dos Santos, Felipe Gomes Naveca, Adriana Cristina Salvador Maia, Cicileia Correia da Silva, Aline Linhares Ferreira de Melo Mendonça, Celina Aparecida Bertoni Lugtenburg, Camila Flávia Gomes Azzi, Juliana Loca Furtado, Suelen Cavalcante, Rita de Cássia Pontello Rampazzo, Caio Henrique Nemeth Santos, Alice Paula Di Sabatino Guimarães, Jansen Fernandes de Medeiros, Fernando Rodrigues Máximo, Juan Miguel Viallobos-Salcedo and Deuilene Souza Vieira |
| EPI_ISL_514137                                                                                                                                                                                                                                                                                                                                                                                                                                                                                                                                                                                                                                                                                                                                                                                                                                                                                                                                                                                                 | Rondônia Central Public Health Laboratory (LACEN/RO), vinculated to State Health Secretariat of Rondônia (SESAU/RO) | Molecular Virology Laboratory of Oswaldo Cruz Foundation of Rondônia            | Luan Felipe Botelho-Souza, Felipe Souza Nogueira-Lima, Tárccio Peixoto Roca, Alcione de Oliveira dos Santos, Felipe Gomes Naveca, Adriana Cristina Salvador Maia, Cicileia Correia da Silva, Aline Linhares Ferreira de Melo Mendonça, Celina Aparecida Bertoni Lugtenburg, Camila Flávia Gomes Azzi, Juliana Loca Furtado, Suelen Cavalcante, Rita de Cássia Pontello Rampazzo, Caio Henrique Nemeth Santos, Alice Paula Di Sabatino Guimarães, Jansen Fernandes de Medeiros, Fernando Rodrigues Máximo, Juan Miguel Viallobos-Salcedo and Deuilene Souza Vieira |
| EPI_ISL_514138                                                                                                                                                                                                                                                                                                                                                                                                                                                                                                                                                                                                                                                                                                                                                                                                                                                                                                                                                                                                 | Rondônia Central Public Health Laboratory (LACEN/RO), vinculated to State Health Secretariat of Rondônia (SESAU/RO) | Molecular Virology Laboratory of Oswaldo Cruz Foundation of Rondônia            | Luan Felipe Botelho-Souza, Felipe Souza Nogueira-Lima, Tárccio Peixoto Roca, Alcione de Oliveira dos Santos, Felipe Gomes Naveca, Adriana Cristina Salvador Maia, Cicileia Correia da Silva, Aline Linhares Ferreira de Melo Mendonça, Celina Aparecida Bertoni Lugtenburg, Camila Flávia Gomes Azzi, Juliana Loca Furtado, Suelen Cavalcante, Rita de Cássia Pontello Rampazzo, Caio Henrique Nemeth Santos, Alice Paula Di Sabatino Guimarães, Jansen Fernandes de Medeiros, Fernando Rodrigues Máximo, Juan Miguel Viallobos-Salcedo and Deuilene Souza Vieira |
| EPI_ISL_514435                                                                                                                                                                                                                                                                                                                                                                                                                                                                                                                                                                                                                                                                                                                                                                                                                                                                                                                                                                                                 | Dr. RSS Hospital, Modasa                                                                                            | Gujarat Biotechnology Research Centre                                           | Harsh Chaudhari, Zarna Patel, Monika Gandhi, Pinal Trivedi, Maharshi Pandya, Nidhi Patel, Nitin Savaliya, Raghawendra Kumar, Dinesh Kumar, Zuber Saiyed, Komal Patel, Labdhi Pandya, Afzal Ansari, Nikha Trivedi, Apurvashin Puvar, Janvi Raval, R D Dixit, A M Kadri, Harsh Bakshi, Chaitanya Joshi, Madhvi Joshi                                                                                                                                                                                                                                                |
| EPI_ISL_514436                                                                                                                                                                                                                                                                                                                                                                                                                                                                                                                                                                                                                                                                                                                                                                                                                                                                                                                                                                                                 | Dr. RSS Hospital, Modasa                                                                                            | Gujarat Biotechnology Research Centre                                           | Zarna Patel, Monika Gandhi, Pinal Trivedi, Maharshi Pandya, Nidhi Patel, Nitin Savaliya, Raghawendra Kumar, Dinesh Kumar, Zuber Saiyed, Komal Patel, Labdhi Pandya, Afzal Ansari, Nikha Trivedi, Maharshi Chaudhari, Apurvashin Puvar, Janvi Raval, R D Dixit, A M Kadri, Harsh Bakshi, Chaitanya Joshi, Madhvi Joshi                                                                                                                                                                                                                                             |
| EPI_ISL_514437                                                                                                                                                                                                                                                                                                                                                                                                                                                                                                                                                                                                                                                                                                                                                                                                                                                                                                                                                                                                 | Dr. RSS Hospital, Modasa                                                                                            | Gujarat Biotechnology Research Centre                                           | Nidhi Patel, Nitin Savaliya, Raghawendra Kumar, Dinesh Kumar, Zuber Saiyed, Komal Patel, Labdhi Pandya, Afzal Ansari, Nikha Trivedi, Harsh Chaudhari, Apurvashin Puvar, Janvi Raval, Zarna Patel, Monika Gandhi, Pinal Trivedi, Maharshi Pandya, R D Dixit, A M Kadri, Harsh Bakshi, Chaitanya Joshi, Madhvi Joshi                                                                                                                                                                                                                                                |
| EPI_ISL_514440                                                                                                                                                                                                                                                                                                                                                                                                                                                                                                                                                                                                                                                                                                                                                                                                                                                                                                                                                                                                 | NSTU COVID-19 Diagnostic Center                                                                                     | NSU Genome Research Institute (NGRI), North South University                    | Dr. Muhammad Maqsood Hossain, Aura Rahman, Prof. Firoz Ahmed, Tahrira Huq, Abdus Sadique, Tamanna Afroze, Jahidul Alam, Md Aminul Islam, Prof. Md. Didar-Ul-Alam, Prof. Kazi Nadim Hasan, Prof. Abdul Khaleque, Prof. Hasan Mahmud Reza                                                                                                                                                                                                                                                                                                                           |
| EPI_ISL_514580                                                                                                                                                                                                                                                                                                                                                                                                                                                                                                                                                                                                                                                                                                                                                                                                                                                                                                                                                                                                 | NSTU COVID-19 Diagnostic Center                                                                                     | NSU Genome Research Institute (NGRI), North South University                    | Dr. Muhammad Maqsood Hossain, Aura Rahman, Prof. Firoz Ahmed, Tahrira Huq, Abdus Sadique, Tamanna Afroze, Jahidul Alam, Md Aminul Islam, Prof. Md. Didar-Ul-Alam, Prof. Kazi Nadim Hasan, Prof. Abdul Khaleque, Prof. Hasan Mahmud Reza                                                                                                                                                                                                                                                                                                                           |
| EPI_ISL_514581                                                                                                                                                                                                                                                                                                                                                                                                                                                                                                                                                                                                                                                                                                                                                                                                                                                                                                                                                                                                 | B.J. Medical College and Civil hospital, Ahmedabad                                                                  | Gujarat Biotechnology Research Centre                                           | Nitin Savaliya, Raghawendra Kumar, Dinesh Kumar, Zuber Saiyed, Komal Patel, Labdhi Pandya, Afzal Ansari, Nikha Trivedi, Pranay Shah, Kamlesh J Upadhyay, Sanjay Kapadia,                                                                                                                                                                                                                                                                                                                                                                                          |





|                                                                                                                                                                                                                                                                                                                                                                                                                                                                                                                                                                                                                                                                                                                                                                                                                                                                                                                                                                                                                                                                                                                                                                                                                                                                                                                                                                                                                                                                                                                                                                                                                                                                                                                                                                                                                                                                                                                                                                                                                                                                                                                                                                                                                                                                                                                                                                                                                                                                                                                                                             |                                                                                               |                                                                                                                                                                                                                                                                                                                                                                                                                                                                  |                                                                                                                                                                                                                                                                                                                                                                                                                                                                                                                                                                                                                                                                |
|-------------------------------------------------------------------------------------------------------------------------------------------------------------------------------------------------------------------------------------------------------------------------------------------------------------------------------------------------------------------------------------------------------------------------------------------------------------------------------------------------------------------------------------------------------------------------------------------------------------------------------------------------------------------------------------------------------------------------------------------------------------------------------------------------------------------------------------------------------------------------------------------------------------------------------------------------------------------------------------------------------------------------------------------------------------------------------------------------------------------------------------------------------------------------------------------------------------------------------------------------------------------------------------------------------------------------------------------------------------------------------------------------------------------------------------------------------------------------------------------------------------------------------------------------------------------------------------------------------------------------------------------------------------------------------------------------------------------------------------------------------------------------------------------------------------------------------------------------------------------------------------------------------------------------------------------------------------------------------------------------------------------------------------------------------------------------------------------------------------------------------------------------------------------------------------------------------------------------------------------------------------------------------------------------------------------------------------------------------------------------------------------------------------------------------------------------------------------------------------------------------------------------------------------------------------|-----------------------------------------------------------------------------------------------|------------------------------------------------------------------------------------------------------------------------------------------------------------------------------------------------------------------------------------------------------------------------------------------------------------------------------------------------------------------------------------------------------------------------------------------------------------------|----------------------------------------------------------------------------------------------------------------------------------------------------------------------------------------------------------------------------------------------------------------------------------------------------------------------------------------------------------------------------------------------------------------------------------------------------------------------------------------------------------------------------------------------------------------------------------------------------------------------------------------------------------------|
| EPI_ISL_515548                                                                                                                                                                                                                                                                                                                                                                                                                                                                                                                                                                                                                                                                                                                                                                                                                                                                                                                                                                                                                                                                                                                                                                                                                                                                                                                                                                                                                                                                                                                                                                                                                                                                                                                                                                                                                                                                                                                                                                                                                                                                                                                                                                                                                                                                                                                                                                                                                                                                                                                                              | Hospital Municipal Dr. Jose Soares Hungria                                                    | Instituto Adolfo Lutz, Interdisciplinary Procedures Center, Strategic Laboratory                                                                                                                                                                                                                                                                                                                                                                                 | Claudio Tavares Sacchi, Claudia Regina Gonçalves, Erica Valessa Ramos Gomes                                                                                                                                                                                                                                                                                                                                                                                                                                                                                                                                                                                    |
| EPI_ISL_515550                                                                                                                                                                                                                                                                                                                                                                                                                                                                                                                                                                                                                                                                                                                                                                                                                                                                                                                                                                                                                                                                                                                                                                                                                                                                                                                                                                                                                                                                                                                                                                                                                                                                                                                                                                                                                                                                                                                                                                                                                                                                                                                                                                                                                                                                                                                                                                                                                                                                                                                                              | UPA Vila Santa Catarina                                                                       | Instituto Adolfo Lutz, Interdisciplinary Procedures Center, Strategic Laboratory                                                                                                                                                                                                                                                                                                                                                                                 | Claudio Tavares Sacchi, Claudia Regina Gonçalves, Erica Valessa Ramos Gomes                                                                                                                                                                                                                                                                                                                                                                                                                                                                                                                                                                                    |
| EPI_ISL_515551, EPI_ISL_515552                                                                                                                                                                                                                                                                                                                                                                                                                                                                                                                                                                                                                                                                                                                                                                                                                                                                                                                                                                                                                                                                                                                                                                                                                                                                                                                                                                                                                                                                                                                                                                                                                                                                                                                                                                                                                                                                                                                                                                                                                                                                                                                                                                                                                                                                                                                                                                                                                                                                                                                              | Hospital Municipal do Tatuape Carmino Caricchio                                               | Instituto Adolfo Lutz, Interdisciplinary Procedures Center, Strategic Laboratory                                                                                                                                                                                                                                                                                                                                                                                 | Claudio Tavares Sacchi, Claudia Regina Gonçalves, Erica Valessa Ramos Gomes                                                                                                                                                                                                                                                                                                                                                                                                                                                                                                                                                                                    |
| EPI_ISL_515553                                                                                                                                                                                                                                                                                                                                                                                                                                                                                                                                                                                                                                                                                                                                                                                                                                                                                                                                                                                                                                                                                                                                                                                                                                                                                                                                                                                                                                                                                                                                                                                                                                                                                                                                                                                                                                                                                                                                                                                                                                                                                                                                                                                                                                                                                                                                                                                                                                                                                                                                              | Hospital Municipal Dr. Ignacio Proença de Gouvea                                              | Instituto Adolfo Lutz, Interdisciplinary Procedures Center, Strategic Laboratory                                                                                                                                                                                                                                                                                                                                                                                 | Claudio Tavares Sacchi, Claudia Regina Gonçalves, Erica Valessa Ramos Gomes                                                                                                                                                                                                                                                                                                                                                                                                                                                                                                                                                                                    |
| EPI_ISL_515554                                                                                                                                                                                                                                                                                                                                                                                                                                                                                                                                                                                                                                                                                                                                                                                                                                                                                                                                                                                                                                                                                                                                                                                                                                                                                                                                                                                                                                                                                                                                                                                                                                                                                                                                                                                                                                                                                                                                                                                                                                                                                                                                                                                                                                                                                                                                                                                                                                                                                                                                              | Pronto Socorro Municipal de Perus                                                             | Instituto Adolfo Lutz, Interdisciplinary Procedures Center, Strategic Laboratory                                                                                                                                                                                                                                                                                                                                                                                 | Claudio Tavares Sacchi, Claudia Regina Gonçalves, Erica Valessa Ramos Gomes                                                                                                                                                                                                                                                                                                                                                                                                                                                                                                                                                                                    |
| EPI_ISL_515555                                                                                                                                                                                                                                                                                                                                                                                                                                                                                                                                                                                                                                                                                                                                                                                                                                                                                                                                                                                                                                                                                                                                                                                                                                                                                                                                                                                                                                                                                                                                                                                                                                                                                                                                                                                                                                                                                                                                                                                                                                                                                                                                                                                                                                                                                                                                                                                                                                                                                                                                              | Hospital Geral de Vila Nova Cachoeirinha                                                      | Instituto Adolfo Lutz, Interdisciplinary Procedures Center, Strategic Laboratory                                                                                                                                                                                                                                                                                                                                                                                 | Claudio Tavares Sacchi, Claudia Regina Gonçalves, Erica Valessa Ramos Gomes                                                                                                                                                                                                                                                                                                                                                                                                                                                                                                                                                                                    |
| EPI_ISL_515557                                                                                                                                                                                                                                                                                                                                                                                                                                                                                                                                                                                                                                                                                                                                                                                                                                                                                                                                                                                                                                                                                                                                                                                                                                                                                                                                                                                                                                                                                                                                                                                                                                                                                                                                                                                                                                                                                                                                                                                                                                                                                                                                                                                                                                                                                                                                                                                                                                                                                                                                              | Hospital Municipal Dr. Mochs Deutisch                                                         | Instituto Adolfo Lutz, Interdisciplinary Procedures Center, Strategic Laboratory                                                                                                                                                                                                                                                                                                                                                                                 | Claudio Tavares Sacchi, Claudia Regina Gonçalves, Erica Valessa Ramos Gomes                                                                                                                                                                                                                                                                                                                                                                                                                                                                                                                                                                                    |
| EPI_ISL_515559, EPI_ISL_515560                                                                                                                                                                                                                                                                                                                                                                                                                                                                                                                                                                                                                                                                                                                                                                                                                                                                                                                                                                                                                                                                                                                                                                                                                                                                                                                                                                                                                                                                                                                                                                                                                                                                                                                                                                                                                                                                                                                                                                                                                                                                                                                                                                                                                                                                                                                                                                                                                                                                                                                              | Hospital Sao Paulo de Ensino da Unifesp                                                       | Instituto Adolfo Lutz, Interdisciplinary Procedures Center, Strategic Laboratory                                                                                                                                                                                                                                                                                                                                                                                 | Claudio Tavares Sacchi, Claudia Regina Gonçalves, Erica Valessa Ramos Gomes                                                                                                                                                                                                                                                                                                                                                                                                                                                                                                                                                                                    |
| EPI_ISL_515561                                                                                                                                                                                                                                                                                                                                                                                                                                                                                                                                                                                                                                                                                                                                                                                                                                                                                                                                                                                                                                                                                                                                                                                                                                                                                                                                                                                                                                                                                                                                                                                                                                                                                                                                                                                                                                                                                                                                                                                                                                                                                                                                                                                                                                                                                                                                                                                                                                                                                                                                              | Hospital Montemagno                                                                           | Instituto Adolfo Lutz, Interdisciplinary Procedures Center, Strategic Laboratory                                                                                                                                                                                                                                                                                                                                                                                 | Claudio Tavares Sacchi, Claudia Regina Gonçalves, Erica Valessa Ramos Gomes                                                                                                                                                                                                                                                                                                                                                                                                                                                                                                                                                                                    |
| EPI_ISL_515562                                                                                                                                                                                                                                                                                                                                                                                                                                                                                                                                                                                                                                                                                                                                                                                                                                                                                                                                                                                                                                                                                                                                                                                                                                                                                                                                                                                                                                                                                                                                                                                                                                                                                                                                                                                                                                                                                                                                                                                                                                                                                                                                                                                                                                                                                                                                                                                                                                                                                                                                              | Hospital Municipal Doutor Alexandre Zao                                                       | Instituto Adolfo Lutz, Interdisciplinary Procedures Center, Strategic Laboratory                                                                                                                                                                                                                                                                                                                                                                                 | Claudio Tavares Sacchi, Claudia Regina Gonçalves, Erica Valessa Ramos Gomes                                                                                                                                                                                                                                                                                                                                                                                                                                                                                                                                                                                    |
| EPI_ISL_515563                                                                                                                                                                                                                                                                                                                                                                                                                                                                                                                                                                                                                                                                                                                                                                                                                                                                                                                                                                                                                                                                                                                                                                                                                                                                                                                                                                                                                                                                                                                                                                                                                                                                                                                                                                                                                                                                                                                                                                                                                                                                                                                                                                                                                                                                                                                                                                                                                                                                                                                                              | Hospital Municipal Dr. Jose Soares Hungria                                                    | Instituto Adolfo Lutz, Interdisciplinary Procedures Center, Strategic Laboratory                                                                                                                                                                                                                                                                                                                                                                                 | Claudio Tavares Sacchi, Claudia Regina Gonçalves, Erica Valessa Ramos Gomes                                                                                                                                                                                                                                                                                                                                                                                                                                                                                                                                                                                    |
| EPI_ISL_515564                                                                                                                                                                                                                                                                                                                                                                                                                                                                                                                                                                                                                                                                                                                                                                                                                                                                                                                                                                                                                                                                                                                                                                                                                                                                                                                                                                                                                                                                                                                                                                                                                                                                                                                                                                                                                                                                                                                                                                                                                                                                                                                                                                                                                                                                                                                                                                                                                                                                                                                                              | Hosp. Municipal Prof. Dr. Alípio Corrêa Netto                                                 | Instituto Adolfo Lutz, Interdisciplinary Procedures Center, Strategic Laboratory                                                                                                                                                                                                                                                                                                                                                                                 | Claudio Tavares Sacchi, Claudia Regina Gonçalves, Erica Valessa Ramos Gomes                                                                                                                                                                                                                                                                                                                                                                                                                                                                                                                                                                                    |
| EPI_ISL_515565                                                                                                                                                                                                                                                                                                                                                                                                                                                                                                                                                                                                                                                                                                                                                                                                                                                                                                                                                                                                                                                                                                                                                                                                                                                                                                                                                                                                                                                                                                                                                                                                                                                                                                                                                                                                                                                                                                                                                                                                                                                                                                                                                                                                                                                                                                                                                                                                                                                                                                                                              | Hospital do Servidor Público Estadual Francisco Morato de Oliveira                            | Instituto Adolfo Lutz, Interdisciplinary Procedures Center, Strategic Laboratory                                                                                                                                                                                                                                                                                                                                                                                 | Claudio Tavares Sacchi, Claudia Regina Gonçalves, Erica Valessa Ramos Gomes                                                                                                                                                                                                                                                                                                                                                                                                                                                                                                                                                                                    |
| EPI_ISL_515566                                                                                                                                                                                                                                                                                                                                                                                                                                                                                                                                                                                                                                                                                                                                                                                                                                                                                                                                                                                                                                                                                                                                                                                                                                                                                                                                                                                                                                                                                                                                                                                                                                                                                                                                                                                                                                                                                                                                                                                                                                                                                                                                                                                                                                                                                                                                                                                                                                                                                                                                              | PS Municipal Dr Lauro Ribas Braga                                                             | Instituto Adolfo Lutz, Interdisciplinary Procedures Center, Strategic Laboratory                                                                                                                                                                                                                                                                                                                                                                                 | Claudio Tavares Sacchi, Claudia Regina Gonçalves, Erica Valessa Ramos Gomes                                                                                                                                                                                                                                                                                                                                                                                                                                                                                                                                                                                    |
| EPI_ISL_515568, EPI_ISL_515569, EPI_ISL_515570, EPI_ISL_515573, EPI_ISL_515574, EPI_ISL_515575, EPI_ISL_515579, EPI_ISL_515580, EPI_ISL_515582, EPI_ISL_515584, EPI_ISL_515585, EPI_ISL_515586, EPI_ISL_515589, EPI_ISL_515592, EPI_ISL_515593, EPI_ISL_515594, EPI_ISL_515596, EPI_ISL_515597, EPI_ISL_515600, EPI_ISL_515601, EPI_ISL_515602, EPI_ISL_515603, EPI_ISL_515604, EPI_ISL_515607, EPI_ISL_515610, EPI_ISL_515612, EPI_ISL_515613, EPI_ISL_515615, EPI_ISL_515616, EPI_ISL_515619, EPI_ISL_515622, EPI_ISL_515623, EPI_ISL_515627, EPI_ISL_515628, EPI_ISL_515631, EPI_ISL_515633, EPI_ISL_515634, EPI_ISL_515635, EPI_ISL_515639, EPI_ISL_515640, EPI_ISL_515641, EPI_ISL_515642, EPI_ISL_515643, EPI_ISL_515645, EPI_ISL_515647, EPI_ISL_515649, EPI_ISL_515650, EPI_ISL_515651, EPI_ISL_515652, EPI_ISL_515653, EPI_ISL_515654, EPI_ISL_515655, EPI_ISL_515656, EPI_ISL_515657, EPI_ISL_515658, EPI_ISL_515659, EPI_ISL_515660, EPI_ISL_515661, EPI_ISL_515662, EPI_ISL_515665, EPI_ISL_515666, EPI_ISL_515669, EPI_ISL_515671, EPI_ISL_515672, EPI_ISL_515674, EPI_ISL_515675, EPI_ISL_515676, EPI_ISL_515680, EPI_ISL_515681, EPI_ISL_515682, EPI_ISL_515683, EPI_ISL_515684, EPI_ISL_515685, EPI_ISL_515686, EPI_ISL_515687, EPI_ISL_515688, EPI_ISL_515689, EPI_ISL_515690, EPI_ISL_515692, EPI_ISL_515693, EPI_ISL_515694, EPI_ISL_515696, EPI_ISL_515697, EPI_ISL_515698, EPI_ISL_515699, EPI_ISL_51700, EPI_ISL_51702, EPI_ISL_51703, EPI_ISL_51704, EPI_ISL_51705, EPI_ISL_51706, EPI_ISL_51707, EPI_ISL_51709, EPI_ISL_51710, EPI_ISL_51711, EPI_ISL_51712, EPI_ISL_51714, EPI_ISL_51715, EPI_ISL_51716, EPI_ISL_51718, EPI_ISL_51719, EPI_ISL_51720, EPI_ISL_51721, EPI_ISL_51722, EPI_ISL_51724, EPI_ISL_51725, EPI_ISL_51729, EPI_ISL_51730, EPI_ISL_51731, EPI_ISL_51732, EPI_ISL_51733, EPI_ISL_51734, EPI_ISL_51736, EPI_ISL_51737, EPI_ISL_51738, EPI_ISL_51739, EPI_ISL_51740, EPI_ISL_51741, EPI_ISL_51744, EPI_ISL_51745, EPI_ISL_51747, EPI_ISL_51748, EPI_ISL_51749, EPI_ISL_51749, EPI_ISL_51751, EPI_ISL_51752, EPI_ISL_51753, EPI_ISL_51754, EPI_ISL_51756, EPI_ISL_51757, EPI_ISL_51758, EPI_ISL_51759, EPI_ISL_51760, EPI_ISL_51762, EPI_ISL_51763, EPI_ISL_51764, EPI_ISL_515767, EPI_ISL_515769, EPI_ISL_515771, EPI_ISL_515773, EPI_ISL_515775, EPI_ISL_515776, EPI_ISL_515777, EPI_ISL_515778, EPI_ISL_515780, EPI_ISL_515781, EPI_ISL_515782, EPI_ISL_515783, EPI_ISL_515784, EPI_ISL_515787, EPI_ISL_515789, EPI_ISL_515790, EPI_ISL_515792, EPI_ISL_515794, EPI_ISL_515796, EPI_ISL_515797, EPI_ISL_515799 | Instituto Adolfo Lutz, Interdisciplinary Procedures Center, Strategic Laboratory              | Claudio Tavares Sacchi, Claudia Regina Gonçalves, Erica Valessa Ramos Gomes                                                                                                                                                                                                                                                                                                                                                                                      |                                                                                                                                                                                                                                                                                                                                                                                                                                                                                                                                                                                                                                                                |
| see above                                                                                                                                                                                                                                                                                                                                                                                                                                                                                                                                                                                                                                                                                                                                                                                                                                                                                                                                                                                                                                                                                                                                                                                                                                                                                                                                                                                                                                                                                                                                                                                                                                                                                                                                                                                                                                                                                                                                                                                                                                                                                                                                                                                                                                                                                                                                                                                                                                                                                                                                                   | NHLS-IALCH                                                                                    | KRISP, KZN Research Innovation and Sequencing Platform                                                                                                                                                                                                                                                                                                                                                                                                           | Giandhari J, Pillay S, Lessells R, Mdlalose K, York D, Khan S, Tegally H, Wilkinson E, de Oliveira T                                                                                                                                                                                                                                                                                                                                                                                                                                                                                                                                                           |
| EPI_ISL_515801, EPI_ISL_515802, EPI_ISL_515803, EPI_ISL_515804, EPI_ISL_515805, EPI_ISL_515806, EPI_ISL_515807, EPI_ISL_515808, EPI_ISL_515809, EPI_ISL_515810, EPI_ISL_515811, EPI_ISL_515812, EPI_ISL_515813, EPI_ISL_51814, EPI_ISL_515815, EPI_ISL_515816, EPI_ISL_515817, EPI_ISL_515818, EPI_ISL_515819, EPI_ISL_515821, EPI_ISL_515822, EPI_ISL_515823, EPI_ISL_515824, EPI_ISL_515825, EPI_ISL_515826, EPI_ISL_515827, EPI_ISL_515828, EPI_ISL_515829, EPI_ISL_515830, EPI_ISL_515831, EPI_ISL_515832, EPI_ISL_515833, EPI_ISL_515834, EPI_ISL_515835, EPI_ISL_515836, EPI_ISL_515837, EPI_ISL_515838, EPI_ISL_515839, EPI_ISL_515841, EPI_ISL_515842, EPI_ISL_515843, EPI_ISL_515844, EPI_ISL_515846, EPI_ISL_515847, EPI_ISL_515848, EPI_ISL_515849, EPI_ISL_51850, EPI_ISL_51851, EPI_ISL_51852, EPI_ISL_51853, EPI_ISL_51854, EPI_ISL_51855, EPI_ISL_51856, EPI_ISL_51857, EPI_ISL_51858, EPI_ISL_51859, EPI_ISL_51861, EPI_ISL_51862, EPI_ISL_51863, EPI_ISL_51864, EPI_ISL_51865, EPI_ISL_51866, EPI_ISL_51867, EPI_ISL_51868, EPI_ISL_51869, EPI_ISL_51870, EPI_ISL_51871, EPI_ISL_51872, EPI_ISL_51873, EPI_ISL_51874, EPI_ISL_51875, EPI_ISL_51876, EPI_ISL_51877, EPI_ISL_51878, EPI_ISL_51879, EPI_ISL_51881, EPI_ISL_51882, EPI_ISL_51883, EPI_ISL_51884, EPI_ISL_51885, EPI_ISL_51886, EPI_ISL_51887, EPI_ISL_51888, EPI_ISL_51889, EPI_ISL_51890, EPI_ISL_51891, EPI_ISL_51892, EPI_ISL_51893                                                                                                                                                                                                                                                                                                                                                                                                                                                                                                                                                                                                                                                                                                                                                                                                                                                                                                                                                                                                                                                                                                                                         | Department of Neurovirology, National Institute of Mental Health and Neuroscience (NIMHANS)   | Chitra Pattabiraman,Vijayalakshmi Reddy, Harsha PK, Risha Rasheed, Pramada Prasad, Shafeeq S Hameed, Manjunatha Venkataswamy, Anita Desai, Ravi Vasanthapuram                                                                                                                                                                                                                                                                                                    |                                                                                                                                                                                                                                                                                                                                                                                                                                                                                                                                                                                                                                                                |
| see above                                                                                                                                                                                                                                                                                                                                                                                                                                                                                                                                                                                                                                                                                                                                                                                                                                                                                                                                                                                                                                                                                                                                                                                                                                                                                                                                                                                                                                                                                                                                                                                                                                                                                                                                                                                                                                                                                                                                                                                                                                                                                                                                                                                                                                                                                                                                                                                                                                                                                                                                                   | Medical Diagnostics Services (MDS)                                                            | KRISP, KZN Research Innovation and Sequencing Platform                                                                                                                                                                                                                                                                                                                                                                                                           | Giandhari J, Pillay S, Lessells R, Chimukangara B, Mdlalose K, York D, Khan S, Tegally H, Wilkinson E, de Oliveira T                                                                                                                                                                                                                                                                                                                                                                                                                                                                                                                                           |
| EPI_ISL_515938, EPI_ISL_515941, EPI_ISL_515942                                                                                                                                                                                                                                                                                                                                                                                                                                                                                                                                                                                                                                                                                                                                                                                                                                                                                                                                                                                                                                                                                                                                                                                                                                                                                                                                                                                                                                                                                                                                                                                                                                                                                                                                                                                                                                                                                                                                                                                                                                                                                                                                                                                                                                                                                                                                                                                                                                                                                                              | CV RAMAN HOSPITAL                                                                             | Department of Neurovirology, National Institute of Mental Health and Neuroscience (NIMHANS)                                                                                                                                                                                                                                                                                                                                                                      | Chitra Pattabiraman,Vijayalakshmi Reddy, Harsha PK, Risha Rasheed, Pramada Prasad, Shafeeq S Hameed, Manjunatha Venkataswamy, Anita Desai, Ravi Vasanthapuram                                                                                                                                                                                                                                                                                                                                                                                                                                                                                                  |
| EPI_ISL_515945, EPI_ISL_515947                                                                                                                                                                                                                                                                                                                                                                                                                                                                                                                                                                                                                                                                                                                                                                                                                                                                                                                                                                                                                                                                                                                                                                                                                                                                                                                                                                                                                                                                                                                                                                                                                                                                                                                                                                                                                                                                                                                                                                                                                                                                                                                                                                                                                                                                                                                                                                                                                                                                                                                              | DH                                                                                            | Department of Neurovirology, National Institute of Mental Health and Neuroscience (NIMHANS)                                                                                                                                                                                                                                                                                                                                                                      | Chitra Pattabiraman,Vijayalakshmi Reddy, Harsha PK, Risha Rasheed, Pramada Prasad, Shafeeq S Hameed, Manjunatha Venkataswamy, Anita Desai, Ravi Vasanthapuram                                                                                                                                                                                                                                                                                                                                                                                                                                                                                                  |
| EPI_ISL_515952                                                                                                                                                                                                                                                                                                                                                                                                                                                                                                                                                                                                                                                                                                                                                                                                                                                                                                                                                                                                                                                                                                                                                                                                                                                                                                                                                                                                                                                                                                                                                                                                                                                                                                                                                                                                                                                                                                                                                                                                                                                                                                                                                                                                                                                                                                                                                                                                                                                                                                                                              | VICTORIA HOSPITAL                                                                             | Department of Neurovirology, National Institute of Mental Health and Neuroscience (NIMHANS)                                                                                                                                                                                                                                                                                                                                                                      | Chitra Pattabiraman,Vijayalakshmi Reddy, Harsha PK, Risha Rasheed, Pramada Prasad, Shafeeq S Hameed, Manjunatha Venkataswamy, Anita Desai, Ravi Vasanthapuram                                                                                                                                                                                                                                                                                                                                                                                                                                                                                                  |
| EPI_ISL_515954, EPI_ISL_515957, EPI_ISL_515958, EPI_ISL_515959, EPI_ISL_515961                                                                                                                                                                                                                                                                                                                                                                                                                                                                                                                                                                                                                                                                                                                                                                                                                                                                                                                                                                                                                                                                                                                                                                                                                                                                                                                                                                                                                                                                                                                                                                                                                                                                                                                                                                                                                                                                                                                                                                                                                                                                                                                                                                                                                                                                                                                                                                                                                                                                              | DH                                                                                            | Department of Neurovirology, National Institute of Mental Health and Neuroscience (NIMHANS)                                                                                                                                                                                                                                                                                                                                                                      | Chitra Pattabiraman,Vijayalakshmi Reddy, Harsha PK, Risha Rasheed, Pramada Prasad, Shafeeq S Hameed, Manjunatha Venkataswamy, Anita Desai, Ravi Vasanthapuram                                                                                                                                                                                                                                                                                                                                                                                                                                                                                                  |
| EPI_ISL_515963, EPI_ISL_515964, EPI_ISL_515966, EPI_ISL_515967                                                                                                                                                                                                                                                                                                                                                                                                                                                                                                                                                                                                                                                                                                                                                                                                                                                                                                                                                                                                                                                                                                                                                                                                                                                                                                                                                                                                                                                                                                                                                                                                                                                                                                                                                                                                                                                                                                                                                                                                                                                                                                                                                                                                                                                                                                                                                                                                                                                                                              | VICTORIA HOSPITAL                                                                             | Department of Neurovirology, National Institute of Mental Health and Neuroscience (NIMHANS)                                                                                                                                                                                                                                                                                                                                                                      | Chitra Pattabiraman,Vijayalakshmi Reddy, Harsha PK, Risha Rasheed, Pramada Prasad, Shafeeq S Hameed, Manjunatha Venkataswamy, Anita Desai, Ravi Vasanthapuram                                                                                                                                                                                                                                                                                                                                                                                                                                                                                                  |
| EPI_ISL_515968, EPI_ISL_515969, EPI_ISL_515970, EPI_ISL_515971, EPI_ISL_515972, EPI_ISL_515973                                                                                                                                                                                                                                                                                                                                                                                                                                                                                                                                                                                                                                                                                                                                                                                                                                                                                                                                                                                                                                                                                                                                                                                                                                                                                                                                                                                                                                                                                                                                                                                                                                                                                                                                                                                                                                                                                                                                                                                                                                                                                                                                                                                                                                                                                                                                                                                                                                                              | MIMS                                                                                          | Department of Neurovirology, National Institute of Mental Health and Neuroscience (NIMHANS)                                                                                                                                                                                                                                                                                                                                                                      | Chitra Pattabiraman,Vijayalakshmi Reddy, Harsha PK, Risha Rasheed, Pramada Prasad, Shafeeq S Hameed, Manjunatha Venkataswamy, Anita Desai, Ravi Vasanthapuram                                                                                                                                                                                                                                                                                                                                                                                                                                                                                                  |
| EPI_ISL_516609                                                                                                                                                                                                                                                                                                                                                                                                                                                                                                                                                                                                                                                                                                                                                                                                                                                                                                                                                                                                                                                                                                                                                                                                                                                                                                                                                                                                                                                                                                                                                                                                                                                                                                                                                                                                                                                                                                                                                                                                                                                                                                                                                                                                                                                                                                                                                                                                                                                                                                                                              | Instituto de Diagnostico y Referencia Epidemiologicos (INDRE)                                 | Instituto de Diagnostico y Referencia Epidemiologicos (INDRE)                                                                                                                                                                                                                                                                                                                                                                                                    | Ernesto Ramirez-Gonzalez, Abril Rodriguez-Maldonado, Claudia Wong-Arambula , Natividad Cruz-Ortiz, Tatiana Nunez-Garcia, Dayanira Arellano-Suarez, Adnan Araiza-Rodriguez, Fabiola Garces-Ayala, Lucia Hernandez-Rivas, Irma Lopez-Martinez, Gisela Barrera-Badillo.                                                                                                                                                                                                                                                                                                                                                                                           |
| EPI_ISL_516611                                                                                                                                                                                                                                                                                                                                                                                                                                                                                                                                                                                                                                                                                                                                                                                                                                                                                                                                                                                                                                                                                                                                                                                                                                                                                                                                                                                                                                                                                                                                                                                                                                                                                                                                                                                                                                                                                                                                                                                                                                                                                                                                                                                                                                                                                                                                                                                                                                                                                                                                              | Instituto de Diagnostico y Referencia Epidemiologicos (INDRE)                                 | Instituto de Diagnostico y Referencia Epidemiologicos (INDRE)                                                                                                                                                                                                                                                                                                                                                                                                    | Gisela Barrera-Badillo , Abril Rodriguez-Maldonado, Claudia Wong-Arambula , Natividad Cruz-Ortiz, Tatiana Nunez-Garcia, Dayanira Arellano-Suarez, Fabiola Garces-Ayala, Edgar Mendieta-Condado, Lucia Hernandez-Rivas, Irma Lopez-Martinez, Ernesto Ramirez-Gonzalez.                                                                                                                                                                                                                                                                                                                                                                                          |
| EPI_ISL_516613                                                                                                                                                                                                                                                                                                                                                                                                                                                                                                                                                                                                                                                                                                                                                                                                                                                                                                                                                                                                                                                                                                                                                                                                                                                                                                                                                                                                                                                                                                                                                                                                                                                                                                                                                                                                                                                                                                                                                                                                                                                                                                                                                                                                                                                                                                                                                                                                                                                                                                                                              | Instituto de Diagnostico y Referencia Epidemiologicos (INDRE)                                 | Instituto de Diagnostico y Referencia Epidemiologicos (INDRE)                                                                                                                                                                                                                                                                                                                                                                                                    | Ernesto Ramirez-Gonzalez, Abril Rodriguez-Maldonado, Claudia Wong-Arambula , Natividad Cruz-Ortiz, Tatiana Nunez-Garcia, Dayanira Arellano-Suarez, Adnan Araiza-Rodriguez, Edgar Mendieta-Condado, Lucia Hernandez-Rivas, Irma Lopez-Martinez, Gisela Barrera-Badillo.                                                                                                                                                                                                                                                                                                                                                                                         |
| EPI_ISL_516618                                                                                                                                                                                                                                                                                                                                                                                                                                                                                                                                                                                                                                                                                                                                                                                                                                                                                                                                                                                                                                                                                                                                                                                                                                                                                                                                                                                                                                                                                                                                                                                                                                                                                                                                                                                                                                                                                                                                                                                                                                                                                                                                                                                                                                                                                                                                                                                                                                                                                                                                              | Instituto de Diagnostico y Referencia Epidemiologicos (INDRE)                                 | Instituto de Diagnostico y Referencia Epidemiologicos (INDRE)                                                                                                                                                                                                                                                                                                                                                                                                    | Gisela Barrera-Badillo , Abril Rodriguez-Maldonado, Claudia Wong-Arambula , Natividad Cruz-Ortiz, Tatiana Nunez-Garcia, Dayanira Arellano-Suarez, Fabiola Garces-Ayala, Edgar Mendieta-Condado, Lucia Hernandez-Rivas, Irma Lopez-Martinez, Ernesto Ramirez-Gonzalez.                                                                                                                                                                                                                                                                                                                                                                                          |
| EPI_ISL_516620                                                                                                                                                                                                                                                                                                                                                                                                                                                                                                                                                                                                                                                                                                                                                                                                                                                                                                                                                                                                                                                                                                                                                                                                                                                                                                                                                                                                                                                                                                                                                                                                                                                                                                                                                                                                                                                                                                                                                                                                                                                                                                                                                                                                                                                                                                                                                                                                                                                                                                                                              | Instituto de Diagnostico y Referencia Epidemiologicos (INDRE)                                 | Instituto de Diagnostico y Referencia Epidemiologicos (INDRE)                                                                                                                                                                                                                                                                                                                                                                                                    | Gisela Barrera-Badillo , Abril Rodriguez-Maldonado, Claudia Wong-Arambula , Natividad Cruz-Ortiz, Tatiana Nunez-Garcia, Dayanira Arellano-Suarez, Adnan Araiza-Rodriguez, Edgar Mendieta-Condado, Lucia Hernandez-Rivas, Irma Lopez-Martinez, Ernesto Ramirez-Gonzalez.                                                                                                                                                                                                                                                                                                                                                                                        |
| EPI_ISL_516622, EPI_ISL_516624, EPI_ISL_516625                                                                                                                                                                                                                                                                                                                                                                                                                                                                                                                                                                                                                                                                                                                                                                                                                                                                                                                                                                                                                                                                                                                                                                                                                                                                                                                                                                                                                                                                                                                                                                                                                                                                                                                                                                                                                                                                                                                                                                                                                                                                                                                                                                                                                                                                                                                                                                                                                                                                                                              | Instituto de Diagnostico y Referencia Epidemiologicos (INDRE)                                 | Instituto de Diagnostico y Referencia Epidemiologicos (INDRE)                                                                                                                                                                                                                                                                                                                                                                                                    | Gisela Barrera-Badillo , Abril Rodriguez-Maldonado, Claudia Wong-Arambula , Natividad Cruz-Ortiz, Tatiana Nunez-Garcia, Dayanira Arellano-Suarez, Fabiola Garces-Ayala, Edgar Mendieta-Condado, Lucia Hernandez-Rivas, Irma Lopez-Martinez, Ernesto Ramirez-Gonzalez.                                                                                                                                                                                                                                                                                                                                                                                          |
| EPI_ISL_516748, EPI_ISL_516749, EPI_ISL_516750, EPI_ISL_516752, EPI_ISL_516753, EPI_ISL_516755, EPI_ISL_516756, EPI_ISL_516757, EPI_ISL_516758, EPI_ISL_516762, EPI_ISL_516763, EPI_ISL_516764, EPI_ISL_516765, EPI_ISL_516766, EPI_ISL_516767, EPI_ISL_516768, EPI_ISL_516770, EPI_ISL_516771, EPI_ISL_516772, EPI_ISL_516773, EPI_ISL_516774, EPI_ISL_516775, EPI_ISL_516776, EPI_ISL_516777, EPI_ISL_516778, EPI_ISL_516779                                                                                                                                                                                                                                                                                                                                                                                                                                                                                                                                                                                                                                                                                                                                                                                                                                                                                                                                                                                                                                                                                                                                                                                                                                                                                                                                                                                                                                                                                                                                                                                                                                                                                                                                                                                                                                                                                                                                                                                                                                                                                                                              | van Bakel Laboratory, Genetics and Genomics Sciences, Icahn School of Medicine at Mount Sinai | van Bakel Laboratory, Genetics and Genomics Sciences, Icahn School of Medicine at Mount Sinai                                                                                                                                                                                                                                                                                                                                                                    | Andrew G. Letizia, Irene Ramos, Ajay Obla, Carl Goforth, Dawn Weir, Yongchao Ge, Marcas M. Bamman, Jayeeta Dutta, Ethan Ellis, Luis Estrella, Mary-Catherine George, Ana S. Gonzalez-Reiche, Darnell Graham, Adriana van de Gucht, Ramiro Gutierrez, Franca Jones, Aspasia Katomiroi, Rhonda Lizewski, Stephen Lizewski, Jan Marayag, Nada Marjanovic, Eugene V. Millar, Venugopalan Nair, German Nudelman, Edgar Nunez, Brian Pike, James Reigembal, Stas Rirk , Ernesto Santa Ana, Rachel S. Gelernter Sealfon, Robert Sebra, Mark Simons, Alessandra Soares-Schanoski, Michael Termini, Sindhu Vangeti, Charles Williams, Harm van Bakel, Stuart C. Sealfon |
| EPI_ISL_516800                                                                                                                                                                                                                                                                                                                                                                                                                                                                                                                                                                                                                                                                                                                                                                                                                                                                                                                                                                                                                                                                                                                                                                                                                                                                                                                                                                                                                                                                                                                                                                                                                                                                                                                                                                                                                                                                                                                                                                                                                                                                                                                                                                                                                                                                                                                                                                                                                                                                                                                                              | Rumah Sakit Akademik Universitas Gadjah Mada                                                  | Genetics Working Group (Pokja Genetik) Faculty of Medicine, Public Health and Nursing Universitas Gadjah Mada (FK-KMK UGM); Disease Investigation Center Wates Ministry of Agriculture Indonesia; Department of Microbiology FK-KMK UGM; Laboratorium Diagnostik Yayasan Tahjia World Mosquito Program (WMP) Yogyakarta Center for Tropical Medicine FK-KMK UGM; Integrated Research center FK-KMK UGM; Department of Computer Science and Electronics FMIPA UGM | Gunadi, Hendra Wibawa, . Marcellus, Mohamad S. Hakim, Edwin W. Daniwijaya, Ludhng P. Rizki, Endah Supriyati, Eggi Arguni, Titik Nuryastuti, Tri Wibawa, Dwi AA Nugrahaningisih, Afiahayati, Siswanto, Alvin S. Kalim, Desyifa Mursalin                                                                                                                                                                                                                                                                                                                                                                                                                         |
| EPI_ISL_516801                                                                                                                                                                                                                                                                                                                                                                                                                                                                                                                                                                                                                                                                                                                                                                                                                                                                                                                                                                                                                                                                                                                                                                                                                                                                                                                                                                                                                                                                                                                                                                                                                                                                                                                                                                                                                                                                                                                                                                                                                                                                                                                                                                                                                                                                                                                                                                                                                                                                                                                                              | Department of Laboratory Medicine, Tan Tock Seng Hospital                                     | Department of Laboratory Medicine, Tan Tock Seng Hospital                                                                                                                                                                                                                                                                                                                                                                                                        | Chen YYC, Zair X, Li C, Tang WY, Maurer-Stroh S, Barkham TMS, Nagarajan N, Sessions OM                                                                                                                                                                                                                                                                                                                                                                                                                                                                                                                                                                         |
| EPI_ISL_516802, EPI_ISL_516803                                                                                                                                                                                                                                                                                                                                                                                                                                                                                                                                                                                                                                                                                                                                                                                                                                                                                                                                                                                                                                                                                                                                                                                                                                                                                                                                                                                                                                                                                                                                                                                                                                                                                                                                                                                                                                                                                                                                                                                                                                                                                                                                                                                                                                                                                                                                                                                                                                                                                                                              | Department of Laboratory Medicine, Tan Tock Seng Hospital                                     | Department of Laboratory Medicine, Tan Tock Seng Hospital                                                                                                                                                                                                                                                                                                                                                                                                        | Chen YYC, Zair X, Li C, Tang WY, Maurer-Stroh S, Barkham TMS, Nagarajan N, Sessions OM                                                                                                                                                                                                                                                                                                                                                                                                                                                                                                                                                                         |
| EPI_ISL_516804                                                                                                                                                                                                                                                                                                                                                                                                                                                                                                                                                                                                                                                                                                                                                                                                                                                                                                                                                                                                                                                                                                                                                                                                                                                                                                                                                                                                                                                                                                                                                                                                                                                                                                                                                                                                                                                                                                                                                                                                                                                                                                                                                                                                                                                                                                                                                                                                                                                                                                                                              | Department of Laboratory Medicine, Tan Tock Seng Hospital                                     | Department of Laboratory Medicine, Tan Tock Seng Hospital                                                                                                                                                                                                                                                                                                                                                                                                        | Chen YYC, Zair X, Li C, Tang WY, Maurer-Stroh S, Barkham TMS, Nagarajan N, Sessions OM                                                                                                                                                                                                                                                                                                                                                                                                                                                                                                                                                                         |
| EPI_ISL_516805                                                                                                                                                                                                                                                                                                                                                                                                                                                                                                                                                                                                                                                                                                                                                                                                                                                                                                                                                                                                                                                                                                                                                                                                                                                                                                                                                                                                                                                                                                                                                                                                                                                                                                                                                                                                                                                                                                                                                                                                                                                                                                                                                                                                                                                                                                                                                                                                                                                                                                                                              | Department of Laboratory Medicine, Tan Tock Seng Hospital                                     | Department of Laboratory Medicine, Tan Tock Seng Hospital                                                                                                                                                                                                                                                                                                                                                                                                        | Chen YYC, Zair X, Li C, Tang WY, Maurer-Stroh S, Barkham TMS, Nagarajan N, Sessions OM                                                                                                                                                                                                                                                                                                                                                                                                                                                                                                                                                                         |
| EPI_ISL_516806                                                                                                                                                                                                                                                                                                                                                                                                                                                                                                                                                                                                                                                                                                                                                                                                                                                                                                                                                                                                                                                                                                                                                                                                                                                                                                                                                                                                                                                                                                                                                                                                                                                                                                                                                                                                                                                                                                                                                                                                                                                                                                                                                                                                                                                                                                                                                                                                                                                                                                                                              | Rumah Sakit PKU Gamping                                                                       | Genetics Working Group (Pokja Genetik) Faculty of Medicine, Public Health and Nursing Universitas Gadjah Mada (FK-KMK UGM); Disease Investigation Center Wates Ministry of Agriculture Indonesia; Department of Microbiology FK-KMK UGM; Laboratorium Diagnostik Yayasan Tahjia World Mosquito Program (WMP) Yogyakarta Center for Tropical Medicine FK-KMK UGM; Integrated Research center FK-KMK UGM; Department of Computer Science and Electronics FMIPA UGM | Gunadi, Hendra Wibawa, . Marcellus, Mohamad S. Hakim, Edwin W. Daniwijaya, Ludhng P. Rizki, Endah Supriyati, Eggi Arguni, Titik Nuryastuti, Tri Wibawa, Dwi AA Nugrahaningisih, . Afiahayati , . Siswanto, Ardorisye Saptaty Fornia, Kemala Athollah                                                                                                                                                                                                                                                                                                                                                                                                           |
| EPI_ISL_516829                                                                                                                                                                                                                                                                                                                                                                                                                                                                                                                                                                                                                                                                                                                                                                                                                                                                                                                                                                                                                                                                                                                                                                                                                                                                                                                                                                                                                                                                                                                                                                                                                                                                                                                                                                                                                                                                                                                                                                                                                                                                                                                                                                                                                                                                                                                                                                                                                                                                                                                                              | RSUD Nyl Ageng Serang                                                                         | Genetics Working Group (Pokja Genetik) Faculty of Medicine, Public Health and Nursing Universitas Gadjah Mada (FK-KMK UGM); Disease Investigation Center Wates Ministry of Agriculture Indonesia, Department of Microbiology FK-KMK UGM; Laboratorium Diagnostik Yayasan Tahjia World Mosquito Program (WMP) Yogyakarta Center for Tropical Medicine FK-KMK UGM; Integrated Research Center FK-KMK UGM; Department of Computer Science and Electronics FMIPA UGM | Gunadi, Hendra Wibawa, . Marcellus, Mohamad S. Hakim, Edwin W. Daniwijaya, Ludhng P. Rizki, Endah Supriyati, Eggi Arguni, Titik Nuryastuti, Tri Wibawa, Dwi AA Nugrahaningisih, Afiahayati , . Siswanto, Beby Dewi Sartika, Dyah Ayu Puspitarani                                                                                                                                                                                                                                                                                                                                                                                                               |
| EPI_ISL_516934, EPI_ISL_516938                                                                                                                                                                                                                                                                                                                                                                                                                                                                                                                                                                                                                                                                                                                                                                                                                                                                                                                                                                                                                                                                                                                                                                                                                                                                                                                                                                                                                                                                                                                                                                                                                                                                                                                                                                                                                                                                                                                                                                                                                                                                                                                                                                                                                                                                                                                                                                                                                                                                                                                              | Nicolae Testemitanu State University of Medicine and Pharmacy                                 | International Centre for Genetic Engineering and Biotechnology (ICGEB) and ARGO Open Lab Platform for Genome Sequencing                                                                                                                                                                                                                                                                                                                                          | Ulinici M, Licastro D, Dal Monego S, Rajasekharan S, Marcello A                                                                                                                                                                                                                                                                                                                                                                                                                                                                                                                                                                                                |
| EPI_ISL_516940, EPI_ISL_516942, EPI_ISL_516943, EPI_ISL_516946, EPI_ISL_516948, EPI_ISL_516949, EPI_ISL_516969, EPI_ISL_516974, EPI_ISL_516976, EPI_ISL_516977, EPI_ISL_516980, EPI_ISL_516981, EPI_ISL_516982, EPI_ISL_516983, EPI_ISL_516984, EPI_ISL_516986                                                                                                                                                                                                                                                                                                                                                                                                                                                                                                                                                                                                                                                                                                                                                                                                                                                                                                                                                                                                                                                                                                                                                                                                                                                                                                                                                                                                                                                                                                                                                                                                                                                                                                                                                                                                                                                                                                                                                                                                                                                                                                                                                                                                                                                                                              | see above                                                                                     | King Georges Medical University                                                                                                                                                                                                                                                                                                                                                                                                                                  | CSIR-National Botanical Research Institute                                                                                                                                                                                                                                                                                                                                                                                                                                                                                                                                                                                                                     |
| EPI_ISL_517996, EPI_ISL_517997, EPI_ISL_517998, EPI_ISL_517999, EPI_ISL_518001, EPI_ISL_518002, EPI_ISL_518003, EPI_ISL_518004, EPI_ISL_518005, EPI_ISL_518006, EPI_ISL_518007, EPI_ISL_518008, EPI_ISL_518009, EPI_ISL_518010, EPI_ISL_518011, EPI_ISL_518012, EPI_ISL_518013, EPI_ISL_518014, EPI_ISL_518015, EPI_ISL_518016                                                                                                                                                                                                                                                                                                                                                                                                                                                                                                                                                                                                                                                                                                                                                                                                                                                                                                                                                                                                                                                                                                                                                                                                                                                                                                                                                                                                                                                                                                                                                                                                                                                                                                                                                                                                                                                                                                                                                                                                                                                                                                                                                                                                                              | see above                                                                                     | Singapore General Hospital                                                                                                                                                                                                                                                                                                                                                                                                                                       | Department of Microbiology                                                                                                                                                                                                                                                                                                                                                                                                                                                                                                                                                                                                                                     |
| EPI_ISL_518034, EPI_ISL_518035, EPI_ISL_518037, EPI_ISL_518038, EPI_ISL_518039, EPI_ISL_518040, EPI_ISL_518041, EPI_ISL_518042, EPI_ISL_518043, EPI_ISL_518044, EPI_ISL_518045, EPI_ISL_518046, EPI_ISL_518047, EPI_ISL_518048, EPI_ISL_518049, EPI_ISL_518050, EPI_ISL_518051, EPI_ISL_518052                                                                                                                                                                                                                                                                                                                                                                                                                                                                                                                                                                                                                                                                                                                                                                                                                                                                                                                                                                                                                                                                                                                                                                                                                                                                                                                                                                                                                                                                                                                                                                                                                                                                                                                                                                                                                                                                                                                                                                                                                                                                                                                                                                                                                                                              | see above                                                                                     | NHLS-IALCH                                                                                                                                                                                                                                                                                                                                                                                                                                                       | KRISP, KZN Research Innovation and Sequencing Platform                                                                                                                                                                                                                                                                                                                                                                                                                                                                                                                                                                                                         |
| EPI_ISL_518819                                                                                                                                                                                                                                                                                                                                                                                                                                                                                                                                                                                                                                                                                                                                                                                                                                                                                                                                                                                                                                                                                                                                                                                                                                                                                                                                                                                                                                                                                                                                                                                                                                                                                                                                                                                                                                                                                                                                                                                                                                                                                                                                                                                                                                                                                                                                                                                                                                                                                                                                              | Qadr Hospital, Tangerang, Banten                                                              | Biosafety Level-3 Laboratory, Indonesian Institute of Sciences (LIPI)                                                                                                                                                                                                                                                                                                                                                                                            | Anik Budhi Dharmayanthi, Syam Budi Iryanto, Andri Wardiana, Anggia Prasetyoputri, Isa Nuryana, Ade Andriani, Ario Betha Juansisfiro, Asep M Ridwanuloh, Ahmad Fathoni, Rifki Sadikin, Rathi Asmana Ningrum, Wien Kusaryoto, Puspita Lisdianti                                                                                                                                                                                                                                                                                                                                                                                                                  |

|                                                                |                                                                           |                                                                                                   |                                                                                                                                                                                                                                                                                                                                                     |
|----------------------------------------------------------------|---------------------------------------------------------------------------|---------------------------------------------------------------------------------------------------|-----------------------------------------------------------------------------------------------------------------------------------------------------------------------------------------------------------------------------------------------------------------------------------------------------------------------------------------------------|
| EPI_ISL_522350                                                 | KU Leuven, Rega Institute, Clinical and Epidemiological Virology          | KU Leuven, Rega Institute, Clinical and Epidemiological Virology                                  | Tony Wawina-Bokalanga, Joan Marti-Carerras, Bert Vanmechelen, Piet Maes                                                                                                                                                                                                                                                                             |
| EPI_ISL_522547, EPI_ISL_522548                                 | Plateforme CYROI                                                          | UMR PIMIT Université de La Réunion                                                                | David Wilkinson, Camille Lebarbenchon, Patrick Mavingui                                                                                                                                                                                                                                                                                             |
| EPI_ISL_522874                                                 | Instituto Nacional de Medicina Genómica                                   | Instituto Nacional de Medicina Genómica                                                           | Hidalgo-Miranda A, Mendoza-Vargas A, Reyes-Grajeda JP, Cisneros-Villanueva M, Cedro-Tanda A, Hurtado-Cordova E, Peñaloza-Figueroa F, Herrera-Montalvo LA                                                                                                                                                                                            |
| EPI_ISL_522877                                                 | Instituto Nacional de Medicina Genómica                                   | Instituto Nacional de Medicina Genómica                                                           | Hidalgo-Miranda A, Mendoza-Vargas A, Reyes-Grajeda JP, Cisneros-Villanueva M, Cedro-Tanda A, Hurtado-Cordova E, Peñaloza-Figueroa F, Herrera-Montalvo LA                                                                                                                                                                                            |
| EPI_ISL_522878                                                 | Instituto Nacional de Medicina Genómica                                   | Instituto Nacional de Medicina Genómica                                                           | Hidalgo-Miranda A, Mendoza-Vargas A, Reyes-Grajeda JP, Cisneros-Villanueva M, Hurtado-Cordova E, Cedro-Tanda A, Peñaloza-Figueroa F, Herrera-Montalvo LA                                                                                                                                                                                            |
| EPI_ISL_522880                                                 | Instituto Nacional de Medicina Genómica                                   | Instituto Nacional de Medicina Genómica                                                           | Hidalgo-Miranda A, Mendoza-Vargas A, Reyes-Grajeda JP, Cisneros-Villanueva M, Cedro-Tanda A, Hurtado-Cordova E, Peñaloza-Figueroa F, Herrera-Montalvo LA                                                                                                                                                                                            |
| EPI_ISL_522940                                                 | Instituto Nacional de Medicina Genómica                                   | Instituto Nacional de Medicina Genómica                                                           | Hidalgo-Miranda A, Mendoza-Vargas A, Reyes-Grajeda JP, Cisneros-Villanueva M, Cedro-Tanda A, Hurtado-Cordova E, Peñaloza-Figueroa F, Herrera-Montalvo LA                                                                                                                                                                                            |
| EPI_ISL_522941                                                 | Instituto Nacional de Medicina Genómica                                   | Instituto Nacional de Medicina Genómica                                                           | Hidalgo-Miranda A, Mendoza-Vargas A, Reyes-Grajeda JP, Cisneros-Villanueva M, Cedro-Tanda A, Hurtado-Cordova E, Peñaloza-Figueroa F, Herrera-Montalvo LA                                                                                                                                                                                            |
| EPI_ISL_522942, EPI_ISL_522978, EPI_ISL_522980, EPI_ISL_522981 | Instituto Nacional de Medicina Genómica                                   | Instituto Nacional de Medicina Genómica                                                           | Hidalgo-Miranda A, Mendoza-Vargas A, Reyes-Grajeda JP, Cisneros-Villanueva M, Cedro-Tanda A, Hurtado-Cordova E, Peñaloza-Figueroa F, Herrera-Montalvo LA                                                                                                                                                                                            |
| EPI_ISL_522982                                                 | Instituto Nacional de Medicina Genómica                                   | Instituto Nacional de Medicina Genómica                                                           | Hidalgo-Miranda A, Mendoza-Vargas A, Reyes-Grajeda JP, Cisneros-Villanueva M, Cedro-Tanda A, Hurtado-Cordova E, Peñaloza-Figueroa F, Herrera-Montalvo LA                                                                                                                                                                                            |
| EPI_ISL_522984                                                 | Instituto Nacional de Medicina Genómica                                   | Instituto Nacional de Medicina Genómica                                                           | Hidalgo-Miranda A, Mendoza-Vargas A, Reyes-Grajeda JP, Cisneros-Villanueva M, Cedro-Tanda A, Hurtado-Cordova E, Peñaloza-Figueroa F, Herrera-Montalvo LA                                                                                                                                                                                            |
| EPI_ISL_522986                                                 | Instituto Nacional de Medicina Genómica                                   | Instituto Nacional de Medicina Genómica                                                           | Hidalgo-Miranda A, Mendoza-Vargas A, Reyes-Grajeda JP, Cisneros-Villanueva M, Cedro-Tanda A, Hurtado-Cordova E, Peñaloza-Figueroa F, Herrera-Montalvo LA                                                                                                                                                                                            |
| EPI_ISL_523500                                                 | Instituto Nacional de Medicina Genómica                                   | Instituto Nacional de Medicina Genómica                                                           | Hidalgo-Miranda A, Mendoza-Vargas A, Reyes-Grajeda JP, Cisneros-Villanueva M, Cedro-Tanda A, Hurtado-Cordova E, Peñaloza-Figueroa F, Herrera-Montalvo LA                                                                                                                                                                                            |
| EPI_ISL_523811                                                 | Universidad Iberoamericana, Instituto de Medicina Tropical & Salud Global | International Centre for Genetic Engineering and Biotechnology (ICGEB) and ARGO Open Lab Platform | Robert Paulino-Ramirez, Eileen Riego, Alejandro Vallejo Degaudenzi, Victor Virgilio Calderon, Leandro Tapia, Danilo Licastro, Simeone Dal Monego, Sreejith Rajasekharan and Alessandro Marcello.                                                                                                                                                    |
| EPI_ISL_523955                                                 | Hospital Municipal do Tatuape Carmino Caricchio                           | Instituto Adolfo Lutz, Interdisciplinary Procedures Center, Strategic Laboratory                  | Claudio Tavares Sacchi, Claudia Regina Gonçalves, Erica Valessa Ramos Gomes                                                                                                                                                                                                                                                                         |
| EPI_ISL_523956                                                 | Hospital Regional de Assis                                                | Instituto Adolfo Lutz, Interdisciplinary Procedures Center, Strategic Laboratory                  | Claudio Tavares Sacchi, Claudia Regina Gonçalves, Erica Valessa Ramos Gomes                                                                                                                                                                                                                                                                         |
| EPI_ISL_523957                                                 | Hospital Itamaraty                                                        | Instituto Adolfo Lutz, Interdisciplinary Procedures Center, Strategic Laboratory                  | Claudio Tavares Sacchi, Claudia Regina Gonçalves, Erica Valessa Ramos Gomes                                                                                                                                                                                                                                                                         |
| EPI_ISL_523958, EPI_ISL_523959                                 | Pronto Socorro Municipal de Perus                                         | Instituto Adolfo Lutz, Interdisciplinary Procedures Center, Strategic Laboratory                  | Claudio Tavares Sacchi, Claudia Regina Gonçalves, Erica Valessa Ramos Gomes                                                                                                                                                                                                                                                                         |
| EPI_ISL_523963                                                 | UBS Vila Silvia                                                           | Instituto Adolfo Lutz, Interdisciplinary Procedures Center, Strategic Laboratory                  | Claudio Tavares Sacchi, Claudia Regina Gonçalves, Erica Valessa Ramos Gomes                                                                                                                                                                                                                                                                         |
| EPI_ISL_523965                                                 | Hospital do Servidor Público Estadual Francisco Morato de Oliveira        | Instituto Adolfo Lutz, Interdisciplinary Procedures Center, Strategic Laboratory                  | Claudio Tavares Sacchi, Claudia Regina Gonçalves, Erica Valessa Ramos Gomes                                                                                                                                                                                                                                                                         |
| EPI_ISL_523967                                                 | Hospital Sancta Maggiore                                                  | Instituto Adolfo Lutz, Interdisciplinary Procedures Center, Strategic Laboratory                  | Claudio Tavares Sacchi, Claudia Regina Gonçalves, Erica Valessa Ramos Gomes                                                                                                                                                                                                                                                                         |
| EPI_ISL_523969                                                 | Hospital Sao Paulo de Ensino da Unifesp                                   | Instituto Adolfo Lutz, Interdisciplinary Procedures Center, Strategic Laboratory                  | Claudio Tavares Sacchi, Claudia Regina Gonçalves, Erica Valessa Ramos Gomes                                                                                                                                                                                                                                                                         |
| EPI_ISL_523970                                                 | Conjunto Hospitalar do Mandaqui                                           | Instituto Adolfo Lutz, Interdisciplinary Procedures Center, Strategic Laboratory                  | Claudio Tavares Sacchi, Claudia Regina Gonçalves, Erica Valessa Ramos Gomes                                                                                                                                                                                                                                                                         |
| EPI_ISL_523971                                                 | Hospital Geral Santa Marcelina                                            | Instituto Adolfo Lutz, Interdisciplinary Procedures Center, Strategic Laboratory                  | Claudio Tavares Sacchi, Claudia Regina Gonçalves, Erica Valessa Ramos Gomes                                                                                                                                                                                                                                                                         |
| EPI_ISL_523972                                                 | Hospital do Servidor Público Estadual Francisco Morato de Oliveira        | Instituto Adolfo Lutz, Interdisciplinary Procedures Center, Strategic Laboratory                  | Claudio Tavares Sacchi, Claudia Regina Gonçalves, Erica Valessa Ramos Gomes                                                                                                                                                                                                                                                                         |
| EPI_ISL_523973                                                 | PS Municipal Dona Maria Antonieta Ferreira de Barros                      | Instituto Adolfo Lutz, Interdisciplinary Procedures Center, Strategic Laboratory                  | Claudio Tavares Sacchi, Claudia Regina Gonçalves, Erica Valessa Ramos Gomes                                                                                                                                                                                                                                                                         |
| EPI_ISL_523974                                                 | Hospital Municipal do Tatuape Carmino Caricchio                           | Instituto Adolfo Lutz, Interdisciplinary Procedures Center, Strategic Laboratory                  | Claudio Tavares Sacchi, Claudia Regina Gonçalves, Erica Valessa Ramos Gomes                                                                                                                                                                                                                                                                         |
| EPI_ISL_523975                                                 | UPA Tito Lopes                                                            | Instituto Adolfo Lutz, Interdisciplinary Procedures Center, Strategic Laboratory                  | Claudio Tavares Sacchi, Claudia Regina Gonçalves, Erica Valessa Ramos Gomes                                                                                                                                                                                                                                                                         |
| EPI_ISL_523976                                                 | Hospital Municipal do Tatuape Carmino Caricchio                           | Instituto Adolfo Lutz, Interdisciplinary Procedures Center, Strategic Laboratory                  | Claudio Tavares Sacchi, Claudia Regina Gonçalves, Erica Valessa Ramos Gomes                                                                                                                                                                                                                                                                         |
| EPI_ISL_523977                                                 | Hosp. Municipal Prof. Dr. Alípio Corrêa Netto                             | Instituto Adolfo Lutz, Interdisciplinary Procedures Center, Strategic Laboratory                  | Claudio Tavares Sacchi, Claudia Regina Gonçalves, Erica Valessa Ramos Gomes                                                                                                                                                                                                                                                                         |
| EPI_ISL_523978                                                 | Hospital do Servidor Público Estadual Francisco Morato de Oliveira        | Instituto Adolfo Lutz, Interdisciplinary Procedures Center, Strategic Laboratory                  | Claudio Tavares Sacchi, Claudia Regina Gonçalves, Erica Valessa Ramos Gomes                                                                                                                                                                                                                                                                         |
| EPI_ISL_523980                                                 | UPA Tito Lopes                                                            | Instituto Adolfo Lutz, Interdisciplinary Procedures Center, Strategic Laboratory                  | Claudio Tavares Sacchi, Claudia Regina Gonçalves, Erica Valessa Ramos Gomes                                                                                                                                                                                                                                                                         |
| EPI_ISL_523981                                                 | Hospital Sao Paulo de Ensino da Unifesp                                   | Instituto Adolfo Lutz, Interdisciplinary Procedures Center, Strategic Laboratory                  | Claudio Tavares Sacchi, Claudia Regina Gonçalves, Erica Valessa Ramos Gomes                                                                                                                                                                                                                                                                         |
| EPI_ISL_523982                                                 | Hospital do Servidor Público Estadual Francisco Morato de Oliveira        | Instituto Adolfo Lutz, Interdisciplinary Procedures Center, Strategic Laboratory                  | Claudio Tavares Sacchi, Claudia Regina Gonçalves, Erica Valessa Ramos Gomes                                                                                                                                                                                                                                                                         |
| EPI_ISL_523983                                                 | UPA Campo Limpo                                                           | Instituto Adolfo Lutz, Interdisciplinary Procedures Center, Strategic Laboratory                  | Claudio Tavares Sacchi, Claudia Regina Gonçalves, Erica Valessa Ramos Gomes                                                                                                                                                                                                                                                                         |
| EPI_ISL_523984                                                 | Ama Dr José Soares Hungria                                                | Instituto Adolfo Lutz, Interdisciplinary Procedures Center, Strategic Laboratory                  | Claudio Tavares Sacchi, Claudia Regina Gonçalves, Erica Valessa Ramos Gomes                                                                                                                                                                                                                                                                         |
| EPI_ISL_523985                                                 | Hospital Municipal Dr. Benedetto Montenegro                               | Instituto Adolfo Lutz, Interdisciplinary Procedures Center, Strategic Laboratory                  | Claudio Tavares Sacchi, Claudia Regina Gonçalves, Erica Valessa Ramos Gomes                                                                                                                                                                                                                                                                         |
| EPI_ISL_523986                                                 | Ama Dr Jose Soares Hungria                                                | Instituto Adolfo Lutz, Interdisciplinary Procedures Center, Strategic Laboratory                  | Claudio Tavares Sacchi, Claudia Regina Gonçalves, Erica Valessa Ramos Gomes                                                                                                                                                                                                                                                                         |
| EPI_ISL_523988                                                 | Hospital Sao Paulo de Ensino da Unifesp                                   | Instituto Adolfo Lutz, Interdisciplinary Procedures Center, Strategic Laboratory                  | Claudio Tavares Sacchi, Claudia Regina Gonçalves, Erica Valessa Ramos Gomes                                                                                                                                                                                                                                                                         |
| EPI_ISL_523989                                                 | AMA Jardim Joamar                                                         | Instituto Adolfo Lutz, Interdisciplinary Procedures Center, Strategic Laboratory                  | Claudio Tavares Sacchi, Claudia Regina Gonçalves, Erica Valessa Ramos Gomes                                                                                                                                                                                                                                                                         |
| EPI_ISL_523990                                                 | AMA Jardim Peri                                                           | Instituto Adolfo Lutz, Interdisciplinary Procedures Center, Strategic Laboratory                  | Claudio Tavares Sacchi, Claudia Regina Gonçalves, Erica Valessa Ramos Gomes                                                                                                                                                                                                                                                                         |
| EPI_ISL_523991, EPI_ISL_523992                                 | Hospital Municipal Carmen Prudente                                        | Instituto Adolfo Lutz, Interdisciplinary Procedures Center, Strategic Laboratory                  | Claudio Tavares Sacchi, Claudia Regina Gonçalves, Erica Valessa Ramos Gomes                                                                                                                                                                                                                                                                         |
| EPI_ISL_523993                                                 | UPA Campo Limpo                                                           | Instituto Adolfo Lutz, Interdisciplinary Procedures Center, Strategic Laboratory                  | Claudio Tavares Sacchi, Claudia Regina Gonçalves, Erica Valessa Ramos Gomes                                                                                                                                                                                                                                                                         |
| EPI_ISL_524445, EPI_ISL_524447, EPI_ISL_524448, EPI_ISL_524449 | Singapore General Hospital                                                | Department of Microbiology                                                                        | Nurdyana Abdul Rahman, Kun Lee Lim, Chenhao Li, King Sian Chan, Lynette Oon, Kern Rei Chng, Niranjana Nagarajan, Karrie Ko                                                                                                                                                                                                                          |
| EPI_ISL_524462                                                 | Hospital Metropolitan                                                     | Instituto Adolfo Lutz, Interdisciplinary Procedures Center, Strategic Laboratory                  | Claudio Tavares Sacchi, Claudia Regina Gonçalves, Erica Valessa Ramos Gomes                                                                                                                                                                                                                                                                         |
| EPI_ISL_524463                                                 | Hospital Regional de Cotia                                                | Instituto Adolfo Lutz, Interdisciplinary Procedures Center, Strategic Laboratory                  | Claudio Tavares Sacchi, Claudia Regina Gonçalves, Erica Valessa Ramos Gomes                                                                                                                                                                                                                                                                         |
| EPI_ISL_524464                                                 | Santa Casa de Santa Isabel                                                | Instituto Adolfo Lutz, Interdisciplinary Procedures Center, Strategic Laboratory                  | Claudio Tavares Sacchi, Claudia Regina Gonçalves, Erica Valessa Ramos Gomes                                                                                                                                                                                                                                                                         |
| EPI_ISL_524465                                                 | PS Municipal Dr. Caetano Virgilio Neto                                    | Instituto Adolfo Lutz, Interdisciplinary Procedures Center, Strategic Laboratory                  | Claudio Tavares Sacchi, Claudia Regina Gonçalves, Erica Valessa Ramos Gomes                                                                                                                                                                                                                                                                         |
| EPI_ISL_524466                                                 | PS Municipal Dr Lauro Ribas Braga                                         | Instituto Adolfo Lutz, Interdisciplinary Procedures Center, Strategic Laboratory                  | Claudio Tavares Sacchi, Claudia Regina Gonçalves, Erica Valessa Ramos Gomes                                                                                                                                                                                                                                                                         |
| EPI_ISL_524467                                                 | Hospital Municipal Dr. Moysés Deutsch                                     | Instituto Adolfo Lutz, Interdisciplinary Procedures Center, Strategic Laboratory                  | Claudio Tavares Sacchi, Claudia Regina Gonçalves, Erica Valessa Ramos Gomes                                                                                                                                                                                                                                                                         |
| EPI_ISL_524468                                                 | Hospital Municipal Vereador Jose Storopoli                                | Instituto Adolfo Lutz, Interdisciplinary Procedures Center, Strategic Laboratory                  | Claudio Tavares Sacchi, Claudia Regina Gonçalves, Erica Valessa Ramos Gomes                                                                                                                                                                                                                                                                         |
| EPI_ISL_524469                                                 | Santa Casa de Misericórdia de Sao Paulo                                   | Instituto Adolfo Lutz, Interdisciplinary Procedures Center, Strategic Laboratory                  | Claudio Tavares Sacchi, Claudia Regina Gonçalves, Erica Valessa Ramos Gomes                                                                                                                                                                                                                                                                         |
| EPI_ISL_524470                                                 | Hospital do Servidor Público Estadual Francisco Morato de Oliveira        | Instituto Adolfo Lutz, Interdisciplinary Procedures Center, Strategic Laboratory                  | Claudio Tavares Sacchi, Claudia Regina Gonçalves, Erica Valessa Ramos Gomes                                                                                                                                                                                                                                                                         |
| EPI_ISL_524713                                                 | B.J. Medical College and Civil hospital, Ahmedabad                        | Gujarat Biotechnology Research Centre                                                             | Apurvasinh Puvvar, Janvi Raval, Zarna Patel, Monika Gandhi, Pinal Trivedi, Maharshi Pandya, Nidhi Patel, Nitin Savaliya, Raghawendra Kumar, Dinesh Kumar, Zuber Saiyed, Komal Patel, Labdhi Pandya, Afzal Ansari, Nikha Trivedi, Pranay Shah, Kamlesh J Upadhyay, Sanjay Kapadia, R D Dixit, A M Kadri, Harsh Bakshi, Chaitanya Joshi, Madhvi Joshi |
| EPI_ISL_524714                                                 | B.J. Medical College and Civil hospital, Ahmedabad                        | Gujarat Biotechnology Research Centre                                                             | Janvi Raval, Zarna Patel, Monika Gandhi, Pinal Trivedi, Maharshi Pandya, Nidhi Patel, Nitin Savaliya, Raghawendra Kumar, Dinesh Kumar, Zuber Saiyed, Komal Patel, Labdhi Pandya, Afzal Ansari, Nikha Trivedi, Pranay Shah, Kamlesh J Upadhyay, Sanjay Kapadia, Apurvasinh Puvvar, R D Dixit, A M Kadri, Harsh Bakshi, Chaitanya Joshi, Madhvi Joshi |
| EPI_ISL_524715                                                 | B.J. Medical College and Civil hospital, Ahmedabad                        | Gujarat Biotechnology Research Centre                                                             | Zarna Patel, Monika Gandhi, Pinal Trivedi, Maharshi Pandya, Nidhi Patel, Nitin Savaliya, Raghawendra Kumar, Dinesh Kumar, Zuber Saiyed, Komal Patel, Labdhi Pandya, Afzal Ansari, Nikha Trivedi, Pranay Shah, Kamlesh J Upadhyay, Sanjay Kapadia, Apurvasinh Puvvar, Janvi Raval, R D Dixit, A M Kadri, Harsh Bakshi, Chaitanya Joshi, Madhvi Joshi |
| EPI_ISL_524716                                                 | B.J. Medical College and Civil hospital, Ahmedabad                        | Gujarat Biotechnology Research Centre                                                             | Monika Gandhi, Pinal Trivedi, Maharshi Pandya, Nidhi Patel, Nitin Savaliya, Raghawendra Kumar, Dinesh Kumar, Zuber Saiyed, Komal Patel, Labdhi Pandya, Afzal Ansari, Nikha Trivedi, Pranay Shah, Kamlesh J Upadhyay, Sanjay Kapadia, Apurvasinh Puvvar, Janvi Raval, Zarna Patel, R D Dixit, A M Kadri, Harsh Bakshi, Chaitanya Joshi, Madhvi Joshi |
| EPI_ISL_524717                                                 | B.J. Medical College and Civil hospital, Ahmedabad                        | Gujarat Biotechnology Research Centre                                                             | Pinal Trivedi, Maharshi Pandya, Nidhi Patel, Nitin Savaliya, Raghawendra Kumar, Dinesh Kumar, Zuber Saiyed, Komal Patel, Labdhi Pandya, Afzal Ansari, Nikha Trivedi, Pranay Shah, Kamlesh J Upadhyay, Sanjay Kapadia, Apurvasinh Puvvar, Janvi Raval, Zarna Patel, Monika Gandhi, R D Dixit, A M Kadri, Harsh Bakshi, Chaitanya Joshi, Madhvi Joshi |
| EPI_ISL_524718                                                 | B.J. Medical College and Civil hospital, Ahmedabad                        | Gujarat Biotechnology Research Centre                                                             | Maharshi Pandya, Nidhi Patel, Nitin Savaliya, Raghawendra Kumar, Dinesh Kumar, Zuber Saiyed, Komal Patel, Labdhi Pandya, Afzal Ansari, Nikha Trivedi, Pranay Shah, Kamlesh J Upadhyay, Sanjay Kapadia, Apurvasinh Puvvar, Janvi Raval, Zarna Patel, Monika Gandhi, Pinal Trivedi, R D Dixit, A M Kadri, Harsh Bakshi, Chaitanya Joshi, Madhvi Joshi |
| EPI_ISL_524719                                                 | B.J. Medical College and Civil hospital, Ahmedabad                        | Gujarat Biotechnology Research Centre                                                             | Nidhi Patel, Nitin Savaliya, Raghawendra Kumar, Dinesh Kumar, Zuber Saiyed, Komal Patel, Labdhi Pandya, Afzal Ansari, Nikha Trivedi, Pranay Shah, Kamlesh J Upadhyay, Sanjay Kapadia, Apurvasinh Puvvar, Janvi Raval, Zarna Patel, Monika Gandhi, Pinal Trivedi, Maharshi Pandya, R D Dixit, A M Kadri, Harsh Bakshi, Chaitanya Joshi, Madhvi Joshi |
| EPI_ISL_524720                                                 | B.J. Medical College and Civil hospital, Ahmedabad                        | Gujarat Biotechnology Research Centre                                                             | Nitin Savaliya, Raghawendra Kumar, Dinesh Kumar, Zuber Saiyed, Komal Patel, Labdhi Pandya, Afzal Ansari, Nikha Trivedi, Pranay Shah, Kamlesh J Upadhyay, Sanjay Kapadia, Apurvasinh Puvvar, Janvi Raval, Zarna Patel, Monika Gandhi, Pinal Trivedi, Maharshi Pandya, Nidhi Patel, R D Dixit, A M Kadri, Harsh Bakshi, Chaitanya Joshi, Madhvi Joshi |
| EPI_ISL_524721                                                 | B.J. Medical College and Civil hospital, Ahmedabad                        | Gujarat Biotechnology Research Centre                                                             | Raghawendra Kumar, Dinesh Kumar, Zuber Saiyed, Komal Patel, Labdhi Pandya, Afzal Ansari, Nikha Trivedi, Pranay Shah, Kamlesh J Upadhyay, Sanjay Kapadia, Apurvasinh Puvvar, Janvi Raval, Zarna Patel, Monika Gandhi, Pinal Trivedi, Maharshi Pandya, Nidhi Patel, Nitin Savaliya, R D Dixit, A M Kadri, Harsh Bakshi, Chaitanya Joshi, Madhvi Joshi |
| EPI_ISL_524722                                                 | B.J. Medical College and Civil hospital, Ahmedabad                        | Gujarat Biotechnology Research Centre                                                             | Dinesh Kumar, Zuber Saiyed, Komal Patel, Labdhi Pandya, Afzal Ansari, Nikha Trivedi, Pranay Shah, Kamlesh J Upadhyay, Sanjay Kapadia, Apurvasinh Puvvar, Janvi Raval, Zarna Patel, Monika Gandhi, Pinal Trivedi, Maharshi Pandya, Nidhi Patel, Nitin Savaliya, Raghawendra Kumar, R D Dixit, A M Kadri, Harsh Bakshi, Chaitanya Joshi, Madhvi Joshi |



|                                                                                                                                                                                                                                                                                                                                                                                                                                                                |                                                                                                                                                                                                                                                                                       |                                                                                                                                                                                                                                                                                                                                                                                                                                                                  |                                                                                                                                                                                                                                                                                                                                                                                                                                                            |
|----------------------------------------------------------------------------------------------------------------------------------------------------------------------------------------------------------------------------------------------------------------------------------------------------------------------------------------------------------------------------------------------------------------------------------------------------------------|---------------------------------------------------------------------------------------------------------------------------------------------------------------------------------------------------------------------------------------------------------------------------------------|------------------------------------------------------------------------------------------------------------------------------------------------------------------------------------------------------------------------------------------------------------------------------------------------------------------------------------------------------------------------------------------------------------------------------------------------------------------|------------------------------------------------------------------------------------------------------------------------------------------------------------------------------------------------------------------------------------------------------------------------------------------------------------------------------------------------------------------------------------------------------------------------------------------------------------|
| EPI_ISL_525419                                                                                                                                                                                                                                                                                                                                                                                                                                                 | GMERS Medical College and Hospital, Gandhinagar                                                                                                                                                                                                                                       | Gujarat Biotechnology Research Centre                                                                                                                                                                                                                                                                                                                                                                                                                            | Nitin Savaliya, Raghavendra Kumar, Dinesh Kumar, Zuber Saiyed, Komal Patel, Labdhi Pandya, Afzal Ansari, Nikha Trivedi, Seema Bhatt, Gaurishankar Shrimali, Bhavesh Modi, Bharti Rajani, Apurvasinh Puvar, Janvi Raval, Zarna Patel, Monika Gandhi, Pinal Trivedi, Maharsi Pandya, Nidhi Patel, R D Dixit, A M Kadri, Harsh Bakshi, Chaitanya Joshi, Madhvi Joshi                                                                                          |
| EPI_ISL_525420                                                                                                                                                                                                                                                                                                                                                                                                                                                 | GMERS Medical College and Hospital, Gandhinagar                                                                                                                                                                                                                                       | Gujarat Biotechnology Research Centre                                                                                                                                                                                                                                                                                                                                                                                                                            | Raghavendra Kumar, Dinesh Kumar, Zuber Saiyed, Komal Patel, Labdhi Pandya, Afzal Ansari, Nikha Trivedi, Seema Bhatt, Gaurishankar Shrimali, Bhavesh Modi, Bharti Rajani, Apurvasinh Puvar, Janvi Raval, Zarna Patel, Monika Gandhi, Pinal Trivedi, Maharsi Pandya, Nidhi Patel, Nitin Savaliya, R D Dixit, A M Kadri, Harsh Bakshi, Chaitanya Joshi, Madhvi Joshi                                                                                          |
| EPI_ISL_525421                                                                                                                                                                                                                                                                                                                                                                                                                                                 | B.J. Medical College and Civil hospital, Ahmedabad                                                                                                                                                                                                                                    | Gujarat Biotechnology Research Centre                                                                                                                                                                                                                                                                                                                                                                                                                            | Zarna Patel, Monika Gandhi, Pinal Trivedi, Maharsi Pandya, Nidhi Patel, Nitin Savaliya, Raghavendra Kumar, Dinesh Kumar, Zuber Saiyed, Komal Patel, Labdhi Pandya, Afzal Ansari, Nikha Trivedi, Pranay Shah, Kamlesh J Upadhyay, Sanjay Kapadia, Apurvasinh Puvar, Janvi Raval, R D Dixit, A M Kadri, Harsh Bakshi, Chaitanya Joshi, Madhvi Joshi                                                                                                          |
| EPI_ISL_525422                                                                                                                                                                                                                                                                                                                                                                                                                                                 | B.J. Medical College and Civil hospital, Ahmedabad                                                                                                                                                                                                                                    | Gujarat Biotechnology Research Centre                                                                                                                                                                                                                                                                                                                                                                                                                            | Monika Gandhi, Pinal Trivedi, Maharsi Pandya, Nidhi Patel, Nitin Savaliya, Raghavendra Kumar, Dinesh Kumar, Zuber Saiyed, Komal Patel, Labdhi Pandya, Afzal Ansari, Nikha Trivedi, Pranay Shah, Kamlesh J Upadhyay, Sanjay Kapadia, Apurvasinh Puvar, Janvi Raval, Zarna Patel, R D Dixit, A M Kadri, Harsh Bakshi, Chaitanya Joshi, Madhvi Joshi                                                                                                          |
| EPI_ISL_525430                                                                                                                                                                                                                                                                                                                                                                                                                                                 | Institute of Microbiology, Universidad San Francisco de Quito                                                                                                                                                                                                                         | Institute of Microbiology, Universidad San Francisco de Quito                                                                                                                                                                                                                                                                                                                                                                                                    | Juan José Guadalupe, Monica Becerra-Wong, Belén Prado-Vivar, Sully Márquez, Bernardo Gutiérrez, Verónica Barragán, Patricio Rojas-Silva, Gabriel Trueba, Michelle Grunauer, Paúl Cárdenas                                                                                                                                                                                                                                                                  |
| EPI_ISL_525467                                                                                                                                                                                                                                                                                                                                                                                                                                                 | Universidad Iberoamericana                                                                                                                                                                                                                                                            | International Centre for Genetic Engineering and Biotechnology (ICGEB) and ARGO Open Lab Platform                                                                                                                                                                                                                                                                                                                                                                | Robert Paulino-Ramirez, Eileen Riego, Alejandro Vallejo Degaudenzi, Victor Virgilio Calderon, Leandro Tapia, Patricia Leon, Danilo Licastro, Simeone Dal Monego, Sreejith Rajasekharan and Alessandro Marcello                                                                                                                                                                                                                                             |
| EPI_ISL_525468                                                                                                                                                                                                                                                                                                                                                                                                                                                 | Universidad Iberoamericana                                                                                                                                                                                                                                                            | International Centre for Genetic Engineering and Biotechnology (ICGEB) and ARGO Open Lab Platform                                                                                                                                                                                                                                                                                                                                                                | Robert Paulino-Ramirez, Eileen Riego, Alejandro Vallejo Degaudenzi, Victor Virgilio Calderon, Leandro Tapia, Patricia Leon, Danilo Licastro, Simeone Dal Monego, Sreejith Rajasekharan and Alessandro Marcello                                                                                                                                                                                                                                             |
| EPI_ISL_525469                                                                                                                                                                                                                                                                                                                                                                                                                                                 | Universidad Iberoamericana                                                                                                                                                                                                                                                            | International Centre for Genetic Engineering and Biotechnology (ICGEB) and ARGO Open Lab Platform                                                                                                                                                                                                                                                                                                                                                                | Robert Paulino-Ramirez, Eileen Riego, Alejandro Vallejo Degaudenzi, Victor Virgilio Calderon, Leandro Tapia, Patricia Leon, Danilo Licastro, Simeone Dal Monego, Sreejith Rajasekharan and Alessandro Marcello                                                                                                                                                                                                                                             |
| EPI_ISL_525474                                                                                                                                                                                                                                                                                                                                                                                                                                                 | Centre for Dengue Research                                                                                                                                                                                                                                                            | Centre for Dengue Research, USJ, SL                                                                                                                                                                                                                                                                                                                                                                                                                              | Chandima Jeewandara, Deshni Jayathilaka, Dinuka Ariyaratne, Laksiri Gomes, Diyanath Ranasinghe, Dinuka Guruge, Ruwan Wijayamuni, Gathsaurie Neelika Malavige                                                                                                                                                                                                                                                                                               |
| EPI_ISL_525476                                                                                                                                                                                                                                                                                                                                                                                                                                                 | Centre for Dengue Research                                                                                                                                                                                                                                                            | Centre for Dengue Research                                                                                                                                                                                                                                                                                                                                                                                                                                       | Chandima Jeewandara, Deshni Jayathilaka, Dinuka Ariyaratne, Laksiri Gomes, Diyanath Ranasinghe, Dinuka Guruge, Ruwan Wijayamuni, Gathsaurie Neelika Malavige                                                                                                                                                                                                                                                                                               |
| EPI_ISL_525478, EPI_ISL_525479, EPI_ISL_525481                                                                                                                                                                                                                                                                                                                                                                                                                 | Centre for Dengue Research                                                                                                                                                                                                                                                            | Centre for Dengue Research                                                                                                                                                                                                                                                                                                                                                                                                                                       | Chandima Jeewandara, Deshni Jayathilaka, Dinuka Ariyaratne, Laksiri Gomes, Diyanath Ranasinghe, Ananda Wijewickrama, Eranga Narangoda, Damayanthi Idampitiya, Gathsaurie Neelika Malavige                                                                                                                                                                                                                                                                  |
| EPI_ISL_525486, EPI_ISL_525489                                                                                                                                                                                                                                                                                                                                                                                                                                 | Centre for Dengue Research                                                                                                                                                                                                                                                            | Centre for Dengue Research                                                                                                                                                                                                                                                                                                                                                                                                                                       | Chandima Jeewandara, Deshni Jayathilaka, Dinuka Ariyaratne, Laksiri Gomes, Diyanath Ranasinghe, Ananda Wijewickrama, Malika Karunaratne, Eranga Narangoda, Damayanthi Idampitiya, Gathsaurie Neelika Malavige                                                                                                                                                                                                                                              |
| EPI_ISL_525492                                                                                                                                                                                                                                                                                                                                                                                                                                                 | RSUP dr. SOERADJI TIRTONEGORO                                                                                                                                                                                                                                                         | Genetics Working Group (Pokja Genetik) Faculty of Medicine, Public Health and Nursing Universitas Gadjah Mada (FK-KMK UGM), Disease Investigation Center Wates Ministry of Agriculture Indonesia, Department of Microbiology FK-KMK UGM, Laboratorium Diagnostik Yayasan Tahija World Mosquito Program (WMP) Yogyakarta Center for Tropical Medicine FK-KMK UGM, Integrated Research Center FK-KMK UGM, Department of Computer Science and Electronics FMIPA UGM | Gunadi, Hendra Wibawa, Marcellus, Mohamad S. Hakim, Edwin W. Danilwijaya, Ludhng P. Rizki, Endah Supriatya, Eggi Arguni, Titik Nuryastuti, Tri Wibawa, Dwi AA Nugrahainingsih, Afiahayati, Siswanto, Kurniyanto, Indah Juliana, Alvin S. Kalim, Dwiki Afandy                                                                                                                                                                                               |
| EPI_ISL_525495, EPI_ISL_525496                                                                                                                                                                                                                                                                                                                                                                                                                                 | Laboratory of Molecular Virology of the International Centre for Genetic Engineering and Biotechnology (ICGEB)                                                                                                                                                                        | ARGO Open Lab Platform for Genome Sequencing                                                                                                                                                                                                                                                                                                                                                                                                                     | Licastro D, Rajasekharan S, Dal Monego S, Segat L, D'Agaro P, Marcello A                                                                                                                                                                                                                                                                                                                                                                                   |
| EPI_ISL_525553, EPI_ISL_525557, EPI_ISL_525570                                                                                                                                                                                                                                                                                                                                                                                                                 | Istituto Zooprofilattico Sperimentale Puglia e Basilicata; Dipartimento di Bioscienze, Biotecnologie e Biofarmaceutica dell'Università degli Studi di Bari "A.Moro"; Istituto di Biomembrane, Bioenergetica e Biotecnologie Molecolari del Consiglio Nazionale delle Ricerche di Bari | Beaconlab (Bioinformatics, Evolution and Comparative Genomics lab), Dept of Biosciences, University of Milan                                                                                                                                                                                                                                                                                                                                                     | Parisi A, Pesole G., Manzari C., Chiara M                                                                                                                                                                                                                                                                                                                                                                                                                  |
| EPI_ISL_525578, EPI_ISL_525621, EPI_ISL_525627, EPI_ISL_525631, EPI_ISL_525638, EPI_ISL_525639, EPI_ISL_525640, EPI_ISL_525641, EPI_ISL_525642, EPI_ISL_525646, EPI_ISL_525647, EPI_ISL_525648, EPI_ISL_525649, EPI_ISL_525650, EPI_ISL_525654, EPI_ISL_525658, EPI_ISL_525659, EPI_ISL_525676, EPI_ISL_525677, EPI_ISL_525678, EPI_ISL_525679, EPI_ISL_525680, EPI_ISL_525681, EPI_ISL_525682, EPI_ISL_525683, EPI_ISL_525684, EPI_ISL_525685, EPI_ISL_525686 | see above                                                                                                                                                                                                                                                                             | Wadsworth Center, New York State Department of Health                                                                                                                                                                                                                                                                                                                                                                                                            | Kirsten St. George, Daryl M. Lamson, Sara Griesemer, Jonathan Pitnick, Navjot Singh, Matthew D. Shudt, Erica Lasek-Nesselquist                                                                                                                                                                                                                                                                                                                             |
| EPI_ISL_526215, EPI_ISL_526216, EPI_ISL_526217, EPI_ISL_526218, EPI_ISL_526219, EPI_ISL_526220, EPI_ISL_526221, EPI_ISL_526222, EPI_ISL_526223, EPI_ISL_526224, EPI_ISL_526225, EPI_ISL_526226, EPI_ISL_526227, EPI_ISL_526228, EPI_ISL_526229, EPI_ISL_526230, EPI_ISL_526231, EPI_ISL_526232, EPI_ISL_526233, EPI_ISL_526234, EPI_ISL_526235, EPI_ISL_526236, EPI_ISL_526237, EPI_ISL_526238                                                                 | see above                                                                                                                                                                                                                                                                             | Hungarian Defence Forces Military Medical Centre                                                                                                                                                                                                                                                                                                                                                                                                                 | Endre Gábor Tóth, Balázs Somogyi, Bálint Eszenyi, Ferenc Jakab, Gábor Kemenci                                                                                                                                                                                                                                                                                                                                                                              |
| EPI_ISL_526686, EPI_ISL_526687, EPI_ISL_526688                                                                                                                                                                                                                                                                                                                                                                                                                 | Faith Laboratory, Immunology Institute, Icahn School of Medicine at Mount Sinai                                                                                                                                                                                                       | van Bakel Laboratory, Genetics and Genomics Sciences, Icahn School of Medicine at Mount Sinai                                                                                                                                                                                                                                                                                                                                                                    | Graham J. Britton, Alice Chen-Liaw, Francesca Cossarini, Alexandra Livanos, Matthew P. Spindler, Tamar Plitt, Joseph Eggers, Marla Mogno, Ana S. Gonzalez-Reiche, Sophia Sui, Michael Tankelevich, Lauren Tal Grinspan, Rebekah E. Dixon, Divya Jha, Gustavo Martinez-Delgado, Fatima Amanat, Daisy Hoagland, Benjamin R. tenOver, Maria C. Dubinsky, Miriam Merad, Harm Van Bakel, Florian Krammer, Gerold Bongers, Saurabh Mehndru and Jeremiah J. Faith |
| EPI_ISL_526933, EPI_ISL_526934                                                                                                                                                                                                                                                                                                                                                                                                                                 | Instituto Nacional de Salud, Bogotá, Colombia                                                                                                                                                                                                                                         | Instituto Nacional de Salud, Bogotá, Colombia                                                                                                                                                                                                                                                                                                                                                                                                                    | Katherine Laiton-Donato, Diego A. Álvarez-Díaz, Carlos Franco-Muñoz, Mauricio Pacheco-Montealegre, Jonathan Reales, Diego Andrés Prada, Jose A. Usme-Ciro, Zulma M. Cucunubá, Christian Julian Villabona-Arenas, Liz Villabona-Arenas, Sussy Echeverría, Astrid C. Flórez, Carolina Ferro, Diana Marcela Walteros-Acero, Franklin Prieto, Carlos Andrés Durán, Martha Lucia Ospina Martínez, Marcela Mercado-Reyes                                         |
| EPI_ISL_526937, EPI_ISL_526938, EPI_ISL_526939, EPI_ISL_526940, EPI_ISL_526941, EPI_ISL_526943, EPI_ISL_526946                                                                                                                                                                                                                                                                                                                                                 | Faroese National Reference Laboratory for Fish and Animal Diseases                                                                                                                                                                                                                    | Faroese National Reference Laboratory for Fish and Animal Diseases                                                                                                                                                                                                                                                                                                                                                                                               | Maria Marjunardóttir Dahl, Petra Elisabeth Petersen, Debes Hammershaibm Christiansen                                                                                                                                                                                                                                                                                                                                                                       |
| EPI_ISL_526949, EPI_ISL_526950, EPI_ISL_526951, EPI_ISL_526955, EPI_ISL_526956, EPI_ISL_526958                                                                                                                                                                                                                                                                                                                                                                 | Instituto Nacional de Salud, Bogotá, Colombia                                                                                                                                                                                                                                         | Instituto Nacional de Salud, Bogotá, Colombia                                                                                                                                                                                                                                                                                                                                                                                                                    | Katherine Laiton-Donato, Diego A. Álvarez-Díaz, Carlos Franco-Muñoz, Mauricio Pacheco-Montealegre, Jonathan Reales, Diego Andrés Prada, Jose A. Usme-Ciro, Zulma M. Cucunubá, Christian Julian Villabona-Arenas, Liz Villabona-Arenas, Sussy Echeverría, Astrid C. Flórez, Carolina Ferro, Diana Marcela Walteros-Acero, Franklin Prieto, Carlos Andrés Durán, Martha Lucia Ospina Martínez, Marcela Mercado-Reyes                                         |
| EPI_ISL_526963, EPI_ISL_526964, EPI_ISL_526965                                                                                                                                                                                                                                                                                                                                                                                                                 | Instituto Nacional de Salud, Bogotá, Colombia                                                                                                                                                                                                                                         | Instituto Nacional de Salud, Bogotá, Colombia                                                                                                                                                                                                                                                                                                                                                                                                                    | Katherine Laiton-Donato, Diego A. Álvarez-Díaz, Carlos Franco-Muñoz, Mauricio Pacheco-Montealegre, Jonathan Reales, Diego Andrés Prada, Jose A. Usme-Ciro, Zulma M. Cucunubá, Christian Julian Villabona-Arenas, Liz Villabona-Arenas, Sussy Echeverría, Astrid C. Flórez, Carolina Ferro, Diana Marcela Walteros-Acero, Franklin Prieto, Carlos Andrés Durán, Martha Lucia Ospina Martínez, Marcela Mercado-Reyes                                         |
| EPI_ISL_526967                                                                                                                                                                                                                                                                                                                                                                                                                                                 | Instituto Nacional de Salud, Bogotá, Colombia                                                                                                                                                                                                                                         | Instituto Nacional de Salud, Bogotá, Colombia                                                                                                                                                                                                                                                                                                                                                                                                                    | Katherine Laiton-Donato, Diego A. Álvarez-Díaz, Carlos Franco-Muñoz, Mauricio Pacheco-Montealegre, Jonathan Reales, Diego Andrés Prada, Jose A. Usme-Ciro, Zulma M. Cucunubá, Christian Julian Villabona-Arenas, Liz Villabona-Arenas, Sussy Echeverría, Astrid C. Flórez, Carolina Ferro, Diana Marcela Walteros-Acero, Franklin Prieto, Carlos Andrés Durán, Martha Lucia Ospina Martínez, Marcela Mercado-Reyes                                         |
| EPI_ISL_526971                                                                                                                                                                                                                                                                                                                                                                                                                                                 | Instituto Nacional de Salud, Bogotá, Colombia                                                                                                                                                                                                                                         | Instituto Nacional de Salud, Bogotá, Colombia                                                                                                                                                                                                                                                                                                                                                                                                                    | Katherine Laiton-Donato, Diego A. Álvarez-Díaz, Carlos Franco-Muñoz, Mauricio Pacheco-Montealegre, Jonathan Reales, Diego Andrés Prada, Jose A. Usme-Ciro, Zulma M. Cucunubá, Christian Julian Villabona-Arenas, Liz Villabona-Arenas, Sussy Echeverría, Astrid C. Flórez, Carolina Ferro, Diana Marcela Walteros-Acero, Franklin Prieto, Carlos Andrés Durán, Martha Lucia Ospina Martínez, Marcela Mercado-Reyes                                         |
| EPI_ISL_527742                                                                                                                                                                                                                                                                                                                                                                                                                                                 | Centro Nacional De Rehabilitación Humberto Araya Rojas (Cenare)                                                                                                                                                                                                                       | Incienza, Instituto Costarricense de Investigación y Enseñanza en Nutrición y Salud                                                                                                                                                                                                                                                                                                                                                                              | Francisco Duarte, Hebleen Porras, Claudio Soto-Garita, Estela Cordero, Adriana Godínez & Melany Calderon                                                                                                                                                                                                                                                                                                                                                   |
| EPI_ISL_527753                                                                                                                                                                                                                                                                                                                                                                                                                                                 | Hospital San Vicente De Paul                                                                                                                                                                                                                                                          | Incienza, Instituto Costarricense de Investigación y Enseñanza en Nutrición y Salud                                                                                                                                                                                                                                                                                                                                                                              | Francisco Duarte, Hebleen Porras, Claudio Soto-Garita, Estela Cordero, Adriana Godínez & Melany Calderon                                                                                                                                                                                                                                                                                                                                                   |
| EPI_ISL_527818, EPI_ISL_527819                                                                                                                                                                                                                                                                                                                                                                                                                                 | Centro de Investigaciones, Universidad de Especialidades Espíritu Santo                                                                                                                                                                                                               | Institute of Microbiology, Universidad San Francisco de Quito                                                                                                                                                                                                                                                                                                                                                                                                    | Derly Andrade, Juan Carlos Fernandez, Belén Prado-Vivar, Sully Márquez, Juan José Guadalupe, Monica Becerra-Wong, Bernardo Gutiérrez, Gabriel Morey, Ruben Armas, Jose Pedro Barberan, Fernando Espinoza, Edith Lopez, Verónica Barragán, Patricio Rojas-Silva, Gabriel Trueba, Michelle Grunauer, Paúl Cárdenas                                                                                                                                           |
| EPI_ISL_527856                                                                                                                                                                                                                                                                                                                                                                                                                                                 | Hospital Municipal Prof. Waldomiro de Paula                                                                                                                                                                                                                                           | Instituto Adolfo Lutz, Interdisciplinary Procedures Center, Strategic Laboratory                                                                                                                                                                                                                                                                                                                                                                                 | Claudio Tavares Sacchi, Claudia Regina Gonçalves, Erica Valessa Ramos Gomes                                                                                                                                                                                                                                                                                                                                                                                |
| EPI_ISL_527857                                                                                                                                                                                                                                                                                                                                                                                                                                                 | Hospital Regional Vale do Ribeira                                                                                                                                                                                                                                                     | Instituto Adolfo Lutz, Interdisciplinary Procedures Center, Strategic Laboratory                                                                                                                                                                                                                                                                                                                                                                                 | Claudio Tavares Sacchi, Claudia Regina Gonçalves, Erica Valessa Ramos Gomes                                                                                                                                                                                                                                                                                                                                                                                |
| EPI_ISL_527858                                                                                                                                                                                                                                                                                                                                                                                                                                                 | Pronto Atendimento Sancta Maggiore Jardim Paulista                                                                                                                                                                                                                                    | Instituto Adolfo Lutz, Interdisciplinary Procedures Center, Strategic Laboratory                                                                                                                                                                                                                                                                                                                                                                                 | Claudio Tavares Sacchi, Claudia Regina Gonçalves, Erica Valessa Ramos Gomes                                                                                                                                                                                                                                                                                                                                                                                |
| EPI_ISL_527859                                                                                                                                                                                                                                                                                                                                                                                                                                                 | Hospital Municipal Vereador Jose Storopoli                                                                                                                                                                                                                                            | Instituto Adolfo Lutz, Interdisciplinary Procedures Center, Strategic Laboratory                                                                                                                                                                                                                                                                                                                                                                                 | Claudio Tavares Sacchi, Claudia Regina Gonçalves, Erica Valessa Ramos Gomes                                                                                                                                                                                                                                                                                                                                                                                |
| EPI_ISL_527860                                                                                                                                                                                                                                                                                                                                                                                                                                                 | Hospital Municipal de Parelheiros Josanias Castanha Braga                                                                                                                                                                                                                             | Instituto Adolfo Lutz, Interdisciplinary Procedures Center, Strategic Laboratory                                                                                                                                                                                                                                                                                                                                                                                 | Claudio Tavares Sacchi, Claudia Regina Gonçalves, Erica Valessa Ramos Gomes                                                                                                                                                                                                                                                                                                                                                                                |
| EPI_ISL_527861                                                                                                                                                                                                                                                                                                                                                                                                                                                 | Hospital e Maternidade Celso Piirro                                                                                                                                                                                                                                                   | Instituto Adolfo Lutz, Interdisciplinary Procedures Center, Strategic Laboratory                                                                                                                                                                                                                                                                                                                                                                                 | Claudio Tavares Sacchi, Claudia Regina Gonçalves, Erica Valessa Ramos Gomes                                                                                                                                                                                                                                                                                                                                                                                |
| EPI_ISL_527862                                                                                                                                                                                                                                                                                                                                                                                                                                                 | Hospital Municipal de Urgência                                                                                                                                                                                                                                                        | Instituto Adolfo Lutz, Interdisciplinary Procedures Center, Strategic Laboratory                                                                                                                                                                                                                                                                                                                                                                                 | Claudio Tavares Sacchi, Claudia Regina Gonçalves, Erica Valessa Ramos Gomes                                                                                                                                                                                                                                                                                                                                                                                |
| EPI_ISL_527863                                                                                                                                                                                                                                                                                                                                                                                                                                                 | Hospital Municipal do Tatuape Carmino Carichio                                                                                                                                                                                                                                        | Instituto Adolfo Lutz, Interdisciplinary Procedures Center, Strategic Laboratory                                                                                                                                                                                                                                                                                                                                                                                 | Claudio Tavares Sacchi, Claudia Regina Gonçalves, Erica Valessa Ramos Gomes                                                                                                                                                                                                                                                                                                                                                                                |
| EPI_ISL_527864                                                                                                                                                                                                                                                                                                                                                                                                                                                 | Hospital e Pronto Socorro Comunitário Vila Iolanda                                                                                                                                                                                                                                    | Instituto Adolfo Lutz, Interdisciplinary Procedures Center, Strategic Laboratory                                                                                                                                                                                                                                                                                                                                                                                 | Claudio Tavares Sacchi, Claudia Regina Gonçalves, Erica Valessa Ramos Gomes                                                                                                                                                                                                                                                                                                                                                                                |
| EPI_ISL_527865                                                                                                                                                                                                                                                                                                                                                                                                                                                 | Hospital e Maternidade São Cristóvão                                                                                                                                                                                                                                                  | Instituto Adolfo Lutz, Interdisciplinary Procedures Center, Strategic Laboratory                                                                                                                                                                                                                                                                                                                                                                                 | Claudio Tavares Sacchi, Claudia Regina Gonçalves, Erica Valessa Ramos Gomes                                                                                                                                                                                                                                                                                                                                                                                |
| EPI_ISL_527866                                                                                                                                                                                                                                                                                                                                                                                                                                                 | PS Municipal Dr Lauro Ribas Braga                                                                                                                                                                                                                                                     | Instituto Adolfo Lutz, Interdisciplinary Procedures Center, Strategic Laboratory                                                                                                                                                                                                                                                                                                                                                                                 | Claudio Tavares Sacchi, Claudia Regina Gonçalves, Erica Valessa Ramos Gomes                                                                                                                                                                                                                                                                                                                                                                                |
| EPI_ISL_527867                                                                                                                                                                                                                                                                                                                                                                                                                                                 | Pronto Socorro Municipal - Balneario São José                                                                                                                                                                                                                                         | Instituto Adolfo Lutz, Interdisciplinary Procedures Center, Strategic Laboratory                                                                                                                                                                                                                                                                                                                                                                                 | Claudio Tavares Sacchi, Claudia Regina Gonçalves, Erica Valessa Ramos Gomes                                                                                                                                                                                                                                                                                                                                                                                |
| EPI_ISL_527868                                                                                                                                                                                                                                                                                                                                                                                                                                                 | Hospital e Maternidade do Braz                                                                                                                                                                                                                                                        | Instituto Adolfo Lutz, Interdisciplinary Procedures Center, Strategic Laboratory                                                                                                                                                                                                                                                                                                                                                                                 | Claudio Tavares Sacchi, Claudia Regina Gonçalves, Erica Valessa Ramos Gomes                                                                                                                                                                                                                                                                                                                                                                                |
| EPI_ISL_527869                                                                                                                                                                                                                                                                                                                                                                                                                                                 | Hospital Municipal Carmen Prudente                                                                                                                                                                                                                                                    | Instituto Adolfo Lutz, Interdisciplinary Procedures Center, Strategic Laboratory                                                                                                                                                                                                                                                                                                                                                                                 | Claudio Tavares Sacchi, Claudia Regina Gonçalves, Erica Valessa Ramos Gomes                                                                                                                                                                                                                                                                                                                                                                                |
| EPI_ISL_527870                                                                                                                                                                                                                                                                                                                                                                                                                                                 | Hospital Municipal Mário Gatti                                                                                                                                                                                                                                                        | Instituto Adolfo Lutz, Interdisciplinary Procedures Center, Strategic Laboratory                                                                                                                                                                                                                                                                                                                                                                                 | Claudio Tavares Sacchi, Claudia Regina Gonçalves, Erica Valessa Ramos Gomes                                                                                                                                                                                                                                                                                                                                                                                |
| EPI_ISL_528382, EPI_ISL_528383, EPI_ISL_528384, EPI_ISL_528385                                                                                                                                                                                                                                                                                                                                                                                                 | Translational Health Science and Technology Institute - ESIC medical college and hospital, Faridabad                                                                                                                                                                                  | THSTI Bioassay laboratory                                                                                                                                                                                                                                                                                                                                                                                                                                        | Saurabh Kumar, Jigme Wangchuk, Anil Kumar Pandey, Asim Das, Guruprasad R. Medigeshi                                                                                                                                                                                                                                                                                                                                                                        |
| EPI_ISL_528538                                                                                                                                                                                                                                                                                                                                                                                                                                                 | Alsafar                                                                                                                                                                                                                                                                               | Alsafar                                                                                                                                                                                                                                                                                                                                                                                                                                                          | Andreas Henschel, Gihan Elsir Ahmed Daw Elbait, Samuel Feng, Rifat, Ernesto Damiani, Guan Tay, Habiba Alsafar                                                                                                                                                                                                                                                                                                                                              |
| EPI_ISL_528539                                                                                                                                                                                                                                                                                                                                                                                                                                                 | LVM/UFJR                                                                                                                                                                                                                                                                              | LNCC                                                                                                                                                                                                                                                                                                                                                                                                                                                             | Gustavo M. Romário M. de Souza; Bruno B. Bezerra; Lucio A. Caldas; Fabio Limonte; Elena Cobos; Sharton V. A. Coelho; Luiz Almeida; Luiza Higga; Isadora A. Correa; Diana Marianni; Luciana B. Arruda; Marcelo Bozza; Orlando Ferreira; Wanderley de Souza; Ana Teresa R. Vasconcelos; Terezinha M. Castineiras; Amílcar Tanuri; Luciana J. Costa                                                                                                           |
| EPI_ISL_528637, EPI_ISL_528638                                                                                                                                                                                                                                                                                                                                                                                                                                 | LVM/UFJR                                                                                                                                                                                                                                                                              | Bioinformatics Laboratory / LNCC                                                                                                                                                                                                                                                                                                                                                                                                                                 | Gustavo D. P. Silva; M. Romário M. de Souza; Bruno B. Bezerra; Lucio A. Caldas; Fabio Limonte; Elena Cobos; Sharton V. A. Coelho; Luiz Almeida; Luiza Higga; Isadora A. Correa; Diana Marianni; Luciana B. Arruda; Marcelo Bozza; Orlando Ferreira; Wanderley de Souza; Ana Teresa R. Vasconcelos; Terezinha M. Castineiras; Amílcar Tanuri; Luciana J. Costa                                                                                              |

EPI\_ISL\_528687, EPI\_ISL\_528689, EPI\_ISL\_528691, EPI\_ISL\_528692, EPI\_ISL\_528693, EPI\_ISL\_528694, EPI\_ISL\_528695, EPI\_ISL\_528696, EPI\_ISL\_528698, EPI\_ISL\_528699, EPI\_ISL\_528700, EPI\_ISL\_528701, EPI\_ISL\_528702, EPI\_ISL\_528703, EPI\_ISL\_528704, EPI\_ISL\_528705, EPI\_ISL\_528706, EPI\_ISL\_528707, EPI\_ISL\_528708, EPI\_ISL\_528709, EPI\_ISL\_528710, EPI\_ISL\_528711, EPI\_ISL\_528712, EPI\_ISL\_528713, EPI\_ISL\_528714, EPI\_ISL\_528715, EPI\_ISL\_528716, EPI\_ISL\_528717, EPI\_ISL\_528718, EPI\_ISL\_528719, EPI\_ISL\_528720, EPI\_ISL\_528721

|                                                                                                                                                                                                                                                                |                                                    |                                                                                                                                                                                                                 |                                                                                                                                                                                                                                                                                                                                                                                                                                                                                                                                                                    |
|----------------------------------------------------------------------------------------------------------------------------------------------------------------------------------------------------------------------------------------------------------------|----------------------------------------------------|-----------------------------------------------------------------------------------------------------------------------------------------------------------------------------------------------------------------|--------------------------------------------------------------------------------------------------------------------------------------------------------------------------------------------------------------------------------------------------------------------------------------------------------------------------------------------------------------------------------------------------------------------------------------------------------------------------------------------------------------------------------------------------------------------|
| see above                                                                                                                                                                                                                                                      | Alsafar - Khalifa University Abu Dhabi             | Alsafar - Khalifa University Abu Dhabi                                                                                                                                                                          | Andreas Henschel, Gihan Daw Elbait, Samuel Feng, Rifat Hamoudi, Ernesto Damiani, Guan Tay, Habiba Alsafar                                                                                                                                                                                                                                                                                                                                                                                                                                                          |
| EPI_ISL_528738, EPI_ISL_528739, EPI_ISL_528740, EPI_ISL_528741                                                                                                                                                                                                 | Malaysia Genome Institute                          | Malaysia Genome Institute                                                                                                                                                                                       | Mohd Noor Mat Isa, Irm Suhayu Sapian, Yusuf Muhammad Noor, Nurhezreen Md Iqbal, Mohd Faizal Abu Bakar, Enizza Kasim, Shamsidar Sopie, Siti Noraini Othman, Azrin Ahmad, Nor Azfa Johari, Shahrul Hisham Zainal Ariffin                                                                                                                                                                                                                                                                                                                                             |
| EPI_ISL_528742                                                                                                                                                                                                                                                 | Malaysia Genome Institute                          | Malaysia Genome Institute                                                                                                                                                                                       | Mohd Noor Mat Isa, Irm Suhayu Sapian, Gan Han Ming, Yusuf Muhammad Noor, Tan Ju Lin, Nurhezreen Md Iqbal, Mohd Faizal Abu Bakar, Enizza Kasim, Shamsidar Sopie, Siti Noraini Othman, Azrin Ahmad, Nor Azfa Johari, Shahrul Hisham Zainal Ariffin                                                                                                                                                                                                                                                                                                                   |
| EPI_ISL_528743, EPI_ISL_528744                                                                                                                                                                                                                                 | Malaysia Genome Institute                          | Malaysia Genome Institute                                                                                                                                                                                       | Mohd Noor Mat Isa, Irm Suhayu Sapian, Yusuf Muhammad Noor, Nurhezreen Md Iqbal, Mohd Faizal Abu Bakar, Enizza Kasim, Shamsidar Sopie, Siti Noraini Othman, Azrin Ahmad, Nor Azfa Johari, Shahrul Hisham Zainal Ariffin                                                                                                                                                                                                                                                                                                                                             |
| EPI_ISL_528745                                                                                                                                                                                                                                                 | Laboratorium Kesehatan Provinsi Jawa Barat         | School of Life Sciences and Technology & School of Pharmacy-Institut Teknologi Bandung; Molecular Genetics Laboratory-Faculty of Medicine-Universitas Padjadjaran; Laboratorium Kesehatan Provinsi Jawa Barat   | Marselina Irasonia Tan, Yulia Sribudiani, Catur Riani, Azzania Fibriani, Husna Nugrahapraja, Tarwadi, Ema Rahmawati, Savira Ekawardhani, Hesti Lina Wiraswati, Ryan Bayusantika Ristandi, Rifky Waluyajati Rachman, Cut Nur Cinthia Alamanda, Lia Faridah, Tri Hanggono Achmad, Mas Rizky A.A. Syamsunarno, Fensi Amalina, Hammam Riza, Sony Solistia Wirawan, Agung Eru Wibowo, Irvan Faizal                                                                                                                                                                      |
| EPI_ISL_528746                                                                                                                                                                                                                                                 | Immanuel Hospital                                  | Molecular Genetics Laboratory-Faculty of Medicine-Universitas Padjadjaran; School of Life Sciences and Technology & School of Pharmacy-Institut Teknologi Bandung; Laboratorium Kesehatan Provinsi Jawa Barat   | Yulia Sribudiani, Tri Hanggono Achmad, Mas Rizky A.A. Syamsunarno, Fensi Amalina, Catur Riani, Azzania Fibriani, Husna Nugrahapraja, Tarwadi, Ema Rahmawati, Savira Ekawardhani, Hesti Lina Wiraswati, Ryan Bayusantika Ristandi, Rifky Waluyajati Rachman, Cut Nur Cinthia Alamanda, Lia Faridah, Hammam Riza, Sony Solistia Wirawan, Agung Eru Wibowo, Irvan Faizal                                                                                                                                                                                              |
| EPI_ISL_528747                                                                                                                                                                                                                                                 | Santo Borromeus Hospital                           | School of Pharmacy & School of Life Sciences and Technology - Institut Teknologi Bandung; Molecular Genetics Laboratory-Faculty of Medicine-Universitas Padjadjaran; Laboratorium Kesehatan Provinsi Jawa Barat | Catur Riani, Marselina Irasonia Tan, Yulia Sribudiani, Azzania Fibriani, Husna Nugrahapraja, Tarwadi, Ema Rahmawati, Savira Ekawardhani, Hesti Lina Wiraswati, Ryan Bayusantika Ristandi, Rifky Waluyajati Rachman, Cut Nur Cinthia Alamanda, Lia Faridah, Miftahul Farid, Karimatu Khoirunnisa, Hammam Riza, Sony Solistia Wirawan, Agung Eru Wibowo, Irvan Faizal                                                                                                                                                                                                |
| EPI_ISL_528748                                                                                                                                                                                                                                                 | Dinkes Provinsi Jawa Barat                         | School of Life Sciences and Technology & School of Pharmacy-Institut Teknologi Bandung; Molecular Genetics Laboratory-Faculty of Medicine-Universitas Padjadjaran; Laboratorium Kesehatan Provinsi Jawa Barat   | Azzania Fibriani, Catur Riani, Marselina Irasonia Tan, Yulia Sribudiani, Husna Nugrahapraja, Tarwadi, Ema Rahmawati, Savira Ekawardhani, Hesti Lina Wiraswati, Ryan Bayusantika Ristandi, Rifky Waluyajati Rachman, Cut Nur Cinthia Alamanda, Lia Faridah, Gusti Ayu Prani Pradani, Adelina Kristiani Rahayu, Hammam Riza, Sony Solistia Wirawan, Agung Eru Wibowo, Irvan Faizal                                                                                                                                                                                   |
| EPI_ISL_528749                                                                                                                                                                                                                                                 | Santosa Hospital Bandung Central                   | School of Life Sciences and Technology & School of Pharmacy-Institut Teknologi Bandung; Molecular Genetics Laboratory-Faculty of Medicine-Universitas Padjadjaran; Laboratorium Kesehatan Provinsi Jawa Barat   | Husna Nugrahapraja, Azzania Fibriani, Catur Riani, Marselina Irasonia Tan, Yulia Sribudiani, Tarwadi, Ema Rahmawati, Savira Ekawardhani, Hesti Lina Wiraswati, Ryan Bayusantika Ristandi, Rifky Waluyajati Rachman, Cut Nur Cinthia Alamanda, Lia Faridah, Davin H. E. Setiarmaga, Rizki Mardian, Hammam Riza, Sony Solistia Wirawan, Agung Eru Wibowo, Irvan Faizal                                                                                                                                                                                               |
| EPI_ISL_528750                                                                                                                                                                                                                                                 | Santo Borromeus Hospital                           | School of Life Sciences and Technology & School of Pharmacy-Institut Teknologi Bandung; Molecular Genetics Laboratory-Faculty of Medicine-Universitas Padjadjaran; Laboratorium Kesehatan Provinsi Jawa Barat   | Marselina Irasonia Tan, Yulia Sribudiani, Catur Riani, Azzania Fibriani, Husna Nugrahapraja, Tarwadi, Ema Rahmawati, Savira Ekawardhani, Hesti Lina Wiraswati, Ryan Bayusantika Ristandi, Rifky Waluyajati Rachman, Cut Nur Cinthia Alamanda, Lia Faridah, Miftahul Farid, Karimatu Khoirunnisa, Hammam Riza, Sony Solistia Wirawan, Agung Eru Wibowo, Irvan Faizal                                                                                                                                                                                                |
| EPI_ISL_528751                                                                                                                                                                                                                                                 | Santo Borromeus Hospital                           | Molecular Genetics Laboratory-Faculty of Medicine-Universitas Padjadjaran; School of Life Sciences and Technology & School of Pharmacy-Institut Teknologi Bandung; Laboratorium Kesehatan Provinsi Jawa Barat   | Yulia Sribudiani, Tri Hanggono Achmad, Mas Rizky A.A. Syamsunarno, Fensi Amalina, Catur Riani, Azzania Fibriani, Husna Nugrahapraja, Marselina Irasonia Tan, Tarwadi, Ema Rahmawati, Savira Ekawardhani, Hesti Lina Wiraswati, Ryan Bayusantika Ristandi, Rifky Waluyajati Rachman, Cut Nur Cinthia Alamanda, Lia Faridah, Hammam Riza, Sony Solistia Wirawan, Agung Eru Wibowo, Irvan Faizal                                                                                                                                                                      |
| EPI_ISL_528752                                                                                                                                                                                                                                                 | Dr. H. A. Rotinsulu Lung Hospital                  | School of Pharmacy & School of Life Sciences and Technology - Institut Teknologi Bandung; Molecular Genetics Laboratory-Faculty of Medicine-Universitas Padjadjaran; Laboratorium Kesehatan Provinsi Jawa Barat | Catur Riani, Marselina Irasonia Tan, Yulia Sribudiani, Azzania Fibriani, Husna Nugrahapraja, Tarwadi, Ema Rahmawati, Savira Ekawardhani, Hesti Lina Wiraswati, Ryan Bayusantika Ristandi, Rifky Waluyajati Rachman, Cut Nur Cinthia Alamanda, Lia Faridah, Gusti Ayu Prani Pradani, Adelina Kristiani Rahayu, Hammam Riza, Sony Solistia Wirawan, Agung Eru Wibowo, Irvan Faizal                                                                                                                                                                                   |
| EPI_ISL_528753                                                                                                                                                                                                                                                 | Dinkes Kota Bogor                                  | School of Life Sciences and Technology & School of Pharmacy-Institut Teknologi Bandung; Molecular Genetics Laboratory-Faculty of Medicine-Universitas Padjadjaran; Laboratorium Kesehatan Provinsi Jawa Barat   | Azzania Fibriani, Catur Riani, Marselina Irasonia Tan, Yulia Sribudiani, Husna Nugrahapraja, Tarwadi, Ema Rahmawati, Savira Ekawardhani, Hesti Lina Wiraswati, Ryan Bayusantika Ristandi, Rifky Waluyajati Rachman, Cut Nur Cinthia Alamanda, Lia Faridah, Davin H. E. Setiarmaga, Rizki Mardian, Hammam Riza, Sony Solistia Wirawan, Agung Eru Wibowo, Irvan Faizal                                                                                                                                                                                               |
| EPI_ISL_528759                                                                                                                                                                                                                                                 | Santo Borromeus Hospital                           | School of Life Sciences and Technology & School of Pharmacy-Institut Teknologi Bandung; Molecular Genetics Laboratory-Faculty of Medicine-Universitas Padjadjaran; Laboratorium Kesehatan Provinsi Jawa Barat   | Husna Nugrahapraja, Azzania Fibriani, Catur Riani, Marselina Irasonia Tan, Yulia Sribudiani, Tarwadi, Ema Rahmawati, Savira Ekawardhani, Hesti Lina Wiraswati, Ryan Bayusantika Ristandi, Rifky Waluyajati Rachman, Cut Nur Cinthia Alamanda, Lia Faridah, Tri Hanggono Achmad, Mas Rizky A.A. Syamsunarno, Fensi Amalina, Hammam Riza, Sony Solistia Wirawan, Agung Eru Wibowo, Irvan Faizal                                                                                                                                                                      |
| EPI_ISL_528809                                                                                                                                                                                                                                                 | Department of Medicine, Gandhi hospital, Hyderabad | CSIR-Centre for Cellular and Molecular Biology                                                                                                                                                                  | Rajarao Mesipogu , Thrilok Chander Bingi ,Vinayasekhar Aedula,Tulasi Nagabandi, Namami Gaur, Sakshi Shambhavi, Lamuk Zaveri, Shagufta Khan, Nikhil Hajrims, M Soujanya Reddy, Pratheusa Maccha, Purushotham Vodnala, Payel Mukherjee, Sofia Banu, Priya Singh, Onkar Kulkarni, Dhivya Vedagiri, Divya Gupta, Vishal Sah, Santosh Kumar Kuncha, Krishnan Harinivas Harshan, Archana Bharadwaj Siva, Karthik Bharadwaj Tallapaka,G. Aditya Kumar, Koushick Sivakumar, Pooja Ramesh Gupta, Rajan Kumar Jha, Shraddha Vijay Lahoti, Rakesh K Mishra, Divya Tej Sowpati |
| EPI_ISL_528810, EPI_ISL_528811, EPI_ISL_528812                                                                                                                                                                                                                 | Department of Medicine, Gandhi hospital, Hyderabad | CSIR-Centre for Cellular and Molecular Biology                                                                                                                                                                  | Thrielok Chander Bingi,Rajarao Mesipogu ,Vinayasekhar Aedula,Lamuk Zaveri, Shagufta Khan, Namami Gaur, Sakshi Shambhavi, Nikhil Hajrims, M Soujanya Reddy, Pratheusa Maccha, Tulasi Nagabandi, Purushotham Vodnala, Payel Mukherjee, Sofia Banu, Priya Singh, Onkar Kulkarni, Dhivya Vedagiri, Divya Gupta, Vishal Sah, Santosh Kumar Kuncha, Krishnan Harinivas Harshan, Archana Bharadwaj Siva, Karthik Bharadwaj Tallapaka, Renu Sudhakar, Somesh Gorde, Gangumala Srinivas Reddy, Sujoy Deb, Swati Bayyana, Rakesh K Mishra, Divya Tej Sowpati                 |
| EPI_ISL_528813                                                                                                                                                                                                                                                 | Department of Medicine, Gandhi hospital, Hyderabad | CSIR-Centre for Cellular and Molecular Biology                                                                                                                                                                  | Vinayasekhar Aedula,Thrilok Chander Bingi, Rajarao Mesipogu, Shagufta Khan, Lamuk Zaveri, Namami Gaur, Sakshi Shambhavi, Nikhil Hajrims, M Soujanya Reddy, Pratheusa Maccha,Tulasi Nagabandi, Purushotham Vodnala, Payel Mukherjee, Sofia Banu, Priya Singh, Onkar Kulkarni, Dhivya Vedagiri, Divya Gupta, Vishal Sah, Santosh Kumar Kuncha, Krishnan Harinivas Harshan, Archana Bharadwaj Siva, Karthik Bharadwaj Tallapaka,Umesh Kumar, Unis Ahmad Bhat, Ajay Sarawagi, Priyanka Pant, Rajkanwar Nathawat, Rakesh K Mishra, Divya Tej Sowpati                    |
| EPI_ISL_528814                                                                                                                                                                                                                                                 | Department of Medicine, Gandhi hospital, Hyderabad | CSIR-Centre for Cellular and Molecular Biology                                                                                                                                                                  | Rajarao Mesipogu , Thrilok Chander Bingi ,Vinayasekhar Aedula,Tulasi Nagabandi, Namami Gaur, Sakshi Shambhavi, Lamuk Zaveri, Shagufta Khan, Nikhil Hajrims, M Soujanya Reddy, Pratheusa Maccha, Purushotham Vodnala, Payel Mukherjee, Sofia Banu, Priya Singh, Onkar Kulkarni, Dhivya Vedagiri, Divya Gupta, Vishal Sah, Santosh Kumar Kuncha, Krishnan Harinivas Harshan, Archana Bharadwaj Siva, Karthik Bharadwaj Tallapaka,G. Aditya Kumar, Koushick Sivakumar, Pooja Ramesh Gupta, Rajan Kumar Jha, Shraddha Vijay Lahoti, Rakesh K Mishra, Divya Tej Sowpati |
| EPI_ISL_528815                                                                                                                                                                                                                                                 | Department of Medicine, Gandhi hospital, Hyderabad | CSIR-Centre for Cellular and Molecular Biology                                                                                                                                                                  | Vinayasekhar Aedula,Thrilok Chander Bingi, Rajarao Mesipogu, Shagufta Khan, Lamuk Zaveri, Namami Gaur, Sakshi Shambhavi, Nikhil Hajrims, M Soujanya Reddy, Pratheusa Maccha,Tulasi Nagabandi, Purushotham Vodnala, Payel Mukherjee, Sofia Banu, Priya Singh, Onkar Kulkarni, Dhivya Vedagiri, Divya Gupta, Vishal Sah, Santosh Kumar Kuncha, Krishnan Harinivas Harshan, Archana Bharadwaj Siva, Karthik Bharadwaj Tallapaka,Umesh Kumar, Unis Ahmad Bhat, Ajay Sarawagi, Priyanka Pant, Rajkanwar Nathawat, Rakesh K Mishra, Divya Tej Sowpati                    |
| EPI_ISL_528816                                                                                                                                                                                                                                                 | Department of Medicine, Gandhi hospital, Hyderabad | CSIR-Centre for Cellular and Molecular Biology                                                                                                                                                                  | Rajarao Mesipogu , Thrilok Chander Bingi ,Vinayasekhar Aedula,Tulasi Nagabandi, Namami Gaur, Sakshi Shambhavi, Lamuk Zaveri, Shagufta Khan, Nikhil Hajrims, M Soujanya Reddy, Pratheusa Maccha, Purushotham Vodnala, Payel Mukherjee, Sofia Banu, Priya Singh, Onkar Kulkarni, Dhivya Vedagiri, Divya Gupta, Vishal Sah, Santosh Kumar Kuncha, Krishnan Harinivas Harshan, Archana Bharadwaj Siva, Karthik Bharadwaj Tallapaka,G. Aditya Kumar, Koushick Sivakumar, Pooja Ramesh Gupta, Rajan Kumar Jha, Shraddha Vijay Lahoti, Rakesh K Mishra, Divya Tej Sowpati |
| EPI_ISL_528817                                                                                                                                                                                                                                                 | Department of Medicine, Gandhi hospital, Hyderabad | CSIR-Centre for Cellular and Molecular Biology                                                                                                                                                                  | Thrielok Chander Bingi,Rajarao Mesipogu ,Vinayasekhar Aedula,Lamuk Zaveri, Shagufta Khan, Namami Gaur, Sakshi Shambhavi, Nikhil Hajrims, M Soujanya Reddy, Pratheusa Maccha, Tulasi Nagabandi, Purushotham Vodnala, Payel Mukherjee, Sofia Banu, Priya Singh, Onkar Kulkarni, Dhivya Vedagiri, Divya Gupta, Vishal Sah, Santosh Kumar Kuncha, Krishnan Harinivas Harshan, Archana Bharadwaj Siva, Karthik Bharadwaj Tallapaka, Renu Sudhakar, Somesh Gorde, Gangumala Srinivas Reddy, Sujoy Deb, Swati Bayyana, Rakesh K Mishra, Divya Tej Sowpati                 |
| EPI_ISL_528818                                                                                                                                                                                                                                                 | Department of Medicine, Gandhi hospital, Hyderabad | CSIR-Centre for Cellular and Molecular Biology                                                                                                                                                                  | Vinayasekhar Aedula,Thrilok Chander Bingi, Rajarao Mesipogu, Shagufta Khan, Lamuk Zaveri, Namami Gaur, Sakshi Shambhavi, Nikhil Hajrims, M Soujanya Reddy, Pratheusa Maccha,Tulasi Nagabandi, Purushotham Vodnala, Payel Mukherjee, Sofia Banu, Priya Singh, Onkar Kulkarni, Dhivya Vedagiri, Divya Gupta, Vishal Sah, Santosh Kumar Kuncha, Krishnan Harinivas Harshan, Archana Bharadwaj Siva, Karthik Bharadwaj Tallapaka,Umesh Kumar, Unis Ahmad Bhat, Ajay Sarawagi, Priyanka Pant, Rajkanwar Nathawat, Rakesh K Mishra, Divya Tej Sowpati                    |
| EPI_ISL_528819, EPI_ISL_528820                                                                                                                                                                                                                                 | Department of Medicine, Gandhi hospital, Hyderabad | CSIR-Centre for Cellular and Molecular Biology                                                                                                                                                                  | Rajarao Mesipogu , Thrilok Chander Bingi ,Vinayasekhar Aedula,Tulasi Nagabandi, Namami Gaur, Sakshi Shambhavi, Lamuk Zaveri, Shagufta Khan, Nikhil Hajrims, M Soujanya Reddy, Pratheusa Maccha, Purushotham Vodnala, Payel Mukherjee, Sofia Banu, Priya Singh, Onkar Kulkarni, Dhivya Vedagiri, Divya Gupta, Vishal Sah, Santosh Kumar Kuncha, Krishnan Harinivas Harshan, Archana Bharadwaj Siva, Karthik Bharadwaj Tallapaka,G. Aditya Kumar, Koushick Sivakumar, Pooja Ramesh Gupta, Rajan Kumar Jha, Shraddha Vijay Lahoti, Rakesh K Mishra, Divya Tej Sowpati |
| EPI_ISL_528821                                                                                                                                                                                                                                                 | Department of Medicine, Gandhi hospital, Hyderabad | CSIR-Centre for Cellular and Molecular Biology                                                                                                                                                                  | Thrielok Chander Bingi,Rajarao Mesipogu ,Vinayasekhar Aedula,Lamuk Zaveri, Shagufta Khan, Namami Gaur, Sakshi Shambhavi, Nikhil Hajrims, M Soujanya Reddy, Pratheusa Maccha, Tulasi Nagabandi, Purushotham Vodnala, Payel Mukherjee, Sofia Banu, Priya Singh, Onkar Kulkarni, Dhivya Vedagiri, Divya Gupta, Vishal Sah, Santosh Kumar Kuncha, Krishnan Harinivas Harshan, Archana Bharadwaj Siva, Karthik Bharadwaj Tallapaka, Renu Sudhakar, Somesh Gorde, Gangumala Srinivas Reddy, Sujoy Deb, Swati Bayyana, Rakesh K Mishra, Divya Tej Sowpati                 |
| EPI_ISL_528822                                                                                                                                                                                                                                                 | Department of Medicine, Gandhi hospital, Hyderabad | CSIR-Centre for Cellular and Molecular Biology                                                                                                                                                                  | Vinayasekhar Aedula,Thrilok Chander Bingi, Rajarao Mesipogu, Shagufta Khan, Lamuk Zaveri, Namami Gaur, Sakshi Shambhavi, Nikhil Hajrims, M Soujanya Reddy, Pratheusa Maccha,Tulasi Nagabandi, Purushotham Vodnala, Payel Mukherjee, Sofia Banu, Priya Singh, Onkar Kulkarni, Dhivya Vedagiri, Divya Gupta, Vishal Sah, Santosh Kumar Kuncha, Krishnan Harinivas Harshan, Archana Bharadwaj Siva, Karthik Bharadwaj Tallapaka,Umesh Kumar, Unis Ahmad Bhat, Ajay Sarawagi, Priyanka Pant, Rajkanwar Nathawat, Rakesh K Mishra, Divya Tej Sowpati                    |
| EPI_ISL_528919                                                                                                                                                                                                                                                 | Ospedale Civile S. Liberatore-Atri                 | Istituto Zooprofilattico Sperimentale dell'Abruzzo e Molise "G.Caporale"                                                                                                                                        | Lorusso A, Marccacci M, Di Domenico M, Curini V, Ancora M, Cammà C, Rinaldi A, Mangone I, Di Pasquale A, Puglia I, Savini G,                                                                                                                                                                                                                                                                                                                                                                                                                                       |
| EPI_ISL_528920, EPI_ISL_528921                                                                                                                                                                                                                                 | Presidio Ospedaliero "Santo Spirito"-Pescara       | Istituto Zooprofilattico Sperimentale dell'Abruzzo e Molise "G.Caporale"                                                                                                                                        | Lorusso A, Marccacci M, Di Domenico M, Curini V, Ancora M, Cammà C, Rinaldi A, Mangone I, Di Pasquale A, Puglia I, Savini G,                                                                                                                                                                                                                                                                                                                                                                                                                                       |
| EPI_ISL_528922, EPI_ISL_528924                                                                                                                                                                                                                                 | Ospedale "Giuseppe Mazzini"-Teramo                 | Istituto Zooprofilattico Sperimentale dell'Abruzzo e Molise "G.Caporale"                                                                                                                                        | Lorusso A, Marccacci M, Curini V, Ancora M, Cammà C, Rinaldi A, Mangone I, Di Pasquale A, Puglia I, Savini G,                                                                                                                                                                                                                                                                                                                                                                                                                                                      |
| EPI_ISL_528925                                                                                                                                                                                                                                                 | Ospedale Regionale San Salvatore-L'Aquila          | Istituto Zooprofilattico Sperimentale dell'Abruzzo e Molise "G.Caporale"                                                                                                                                        | Lorusso A, Marccacci M, Di Domenico M, Curini V, Ancora M, Cammà C, Rinaldi A, Mangone I, Di Pasquale A, Puglia I, Savini G,                                                                                                                                                                                                                                                                                                                                                                                                                                       |
| EPI_ISL_528926, EPI_ISL_528927, EPI_ISL_528928                                                                                                                                                                                                                 | Ospedale "Giuseppe Mazzini"-Teramo                 | Istituto Zooprofilattico Sperimentale dell'Abruzzo e Molise "G.Caporale"                                                                                                                                        | Lorusso A, Marccacci M, Di Domenico M, Curini V, Ancora M, Cammà C, Rinaldi A, Mangone I, Di Pasquale A, Puglia I, Savini G,                                                                                                                                                                                                                                                                                                                                                                                                                                       |
| EPI_ISL_528929                                                                                                                                                                                                                                                 | Ospedale Civile S. Liberatore-Atri                 | Istituto Zooprofilattico Sperimentale dell'Abruzzo e Molise "G.Caporale"                                                                                                                                        | Lorusso A, Marccacci M, Di Domenico M, Curini V, Ancora M, Cammà C, Rinaldi A, Mangone I, Di Pasquale A, Puglia I, Savini G,                                                                                                                                                                                                                                                                                                                                                                                                                                       |
| EPI_ISL_528934, EPI_ISL_528935, EPI_ISL_528936, EPI_ISL_528937, EPI_ISL_528938, EPI_ISL_528939, EPI_ISL_528940, EPI_ISL_528941, EPI_ISL_528942, EPI_ISL_528943, EPI_ISL_528944, EPI_ISL_528945, EPI_ISL_528946, EPI_ISL_528947, EPI_ISL_528948, EPI_ISL_528949 | Ospedale Civile S. Liberatore-Atri                 | Istituto Zooprofilattico Sperimentale dell'Abruzzo e Molise "G.Caporale"                                                                                                                                        | Lorusso A, Marccacci M, Di Domenico M, Curini V, Ancora M, Cammà C, Rinaldi A, Mangone I, Di Pasquale A, Puglia I, Savini G,                                                                                                                                                                                                                                                                                                                                                                                                                                       |
| see above                                                                                                                                                                                                                                                      | Agenzia di Tutela della Salute di Bergamo          | Istituto Zooprofilattico Sperimentale dell'Abruzzo e Molise "G.Caporale"                                                                                                                                        | Lorusso A, Marccacci M, Di Domenico M, Curini V, Ancora M, Cammà C, Rinaldi A, Mangone I, Di Pasquale A, Puglia I, Savini G,                                                                                                                                                                                                                                                                                                                                                                                                                                       |
| EPI_ISL_528990                                                                                                                                                                                                                                                 | Ospedale Civile Maria SS. dello Splendore          | Istituto Zooprofilattico Sperimentale dell'Abruzzo e Molise "G.Caporale"                                                                                                                                        | Lorusso A, Marccacci M, Di Domenico M, Curini V, Ancora M, Cammà C, Rinaldi A, Mangone I, Di Pasquale A, Puglia I, Savini G,                                                                                                                                                                                                                                                                                                                                                                                                                                       |
| EPI_ISL_528991                                                                                                                                                                                                                                                 | Ospedale SS Annunziata-Sulmona                     | Istituto Zooprofilattico Sperimentale dell'Abruzzo e Molise "G.Caporale"                                                                                                                                        | Lorusso A, Marccacci M, Di Domenico M, Curini V, Ancora M, Cammà C, Rinaldi A, Mangone I, Di Pasquale A, Puglia I, Savini G,                                                                                                                                                                                                                                                                                                                                                                                                                                       |
| EPI_ISL_528993                                                                                                                                                                                                                                                 | Ospedale Civile S. Liberatore-Atri                 | Istituto Zooprofilattico Sperimentale dell'Abruzzo e Molise "G.Caporale"                                                                                                                                        | Lorusso A, Marccacci M, Di Domenico M, Curini V, Ancora M, Cammà C, Rinaldi A, Mangone I, Di Pasquale A, Puglia I, Savini G,                                                                                                                                                                                                                                                                                                                                                                                                                                       |

|                                                                                                                                                                                                                                                                                                                                                                                                                                                                                                                                                                                                                                                                                                                                                                                                                                                                                                                                                                                                                                                                                                                                                                                                                                                                                                                                                                                                                                                                                                                                                                                                                                                                                                                                                                                                                                                                                                                                                                                                                                                                                                                                                                                                                                                                                                                                                                                                                                                                                                                                                                                                                                                                                                                                                                                                                                                                                                                                                                                                                                |           |                                                                                                                                                                                                                |                                                                                                                                                                                 |                                                                                                                                                                                                                                                                    |
|--------------------------------------------------------------------------------------------------------------------------------------------------------------------------------------------------------------------------------------------------------------------------------------------------------------------------------------------------------------------------------------------------------------------------------------------------------------------------------------------------------------------------------------------------------------------------------------------------------------------------------------------------------------------------------------------------------------------------------------------------------------------------------------------------------------------------------------------------------------------------------------------------------------------------------------------------------------------------------------------------------------------------------------------------------------------------------------------------------------------------------------------------------------------------------------------------------------------------------------------------------------------------------------------------------------------------------------------------------------------------------------------------------------------------------------------------------------------------------------------------------------------------------------------------------------------------------------------------------------------------------------------------------------------------------------------------------------------------------------------------------------------------------------------------------------------------------------------------------------------------------------------------------------------------------------------------------------------------------------------------------------------------------------------------------------------------------------------------------------------------------------------------------------------------------------------------------------------------------------------------------------------------------------------------------------------------------------------------------------------------------------------------------------------------------------------------------------------------------------------------------------------------------------------------------------------------------------------------------------------------------------------------------------------------------------------------------------------------------------------------------------------------------------------------------------------------------------------------------------------------------------------------------------------------------------------------------------------------------------------------------------------------------|-----------|----------------------------------------------------------------------------------------------------------------------------------------------------------------------------------------------------------------|---------------------------------------------------------------------------------------------------------------------------------------------------------------------------------|--------------------------------------------------------------------------------------------------------------------------------------------------------------------------------------------------------------------------------------------------------------------|
| EPI_ISL_528994, EPI_ISL_528995, EPI_ISL_528996, EPI_ISL_528997, EPI_ISL_528998, EPI_ISL_528999, EPI_ISL_529000, EPI_ISL_529001, EPI_ISL_529003, EPI_ISL_529004, EPI_ISL_529005                                                                                                                                                                                                                                                                                                                                                                                                                                                                                                                                                                                                                                                                                                                                                                                                                                                                                                                                                                                                                                                                                                                                                                                                                                                                                                                                                                                                                                                                                                                                                                                                                                                                                                                                                                                                                                                                                                                                                                                                                                                                                                                                                                                                                                                                                                                                                                                                                                                                                                                                                                                                                                                                                                                                                                                                                                                 | see above | Servizio di igiene epidemiologia e sanità pubblica (SIESP)-Chieti                                                                                                                                              | Istituto Zooprofilattico Sperimentale dell'Abruzzo e Molise "G.Caporale"                                                                                                        | Lorusso A, Marcacci M, Di Domenico M, Curini V, Ancora M, Cammà C, Rinaldi A, Mangone I, Di Pasquale A, Puglia I, Savini G.                                                                                                                                        |
| EPI_ISL_529006                                                                                                                                                                                                                                                                                                                                                                                                                                                                                                                                                                                                                                                                                                                                                                                                                                                                                                                                                                                                                                                                                                                                                                                                                                                                                                                                                                                                                                                                                                                                                                                                                                                                                                                                                                                                                                                                                                                                                                                                                                                                                                                                                                                                                                                                                                                                                                                                                                                                                                                                                                                                                                                                                                                                                                                                                                                                                                                                                                                                                 |           | Servizio di igiene e sanità pubblica (SIESP)-Teramo                                                                                                                                                            | Istituto Zooprofilattico Sperimentale dell'Abruzzo e Molise "G.Caporale"                                                                                                        | Lorusso A, Marcacci M, Di Domenico M, Curini V, Ancora M, Cammà C, Rinaldi A, Mangone I, Di Pasquale A, Puglia I, Savini G.                                                                                                                                        |
| EPI_ISL_529007, EPI_ISL_529009                                                                                                                                                                                                                                                                                                                                                                                                                                                                                                                                                                                                                                                                                                                                                                                                                                                                                                                                                                                                                                                                                                                                                                                                                                                                                                                                                                                                                                                                                                                                                                                                                                                                                                                                                                                                                                                                                                                                                                                                                                                                                                                                                                                                                                                                                                                                                                                                                                                                                                                                                                                                                                                                                                                                                                                                                                                                                                                                                                                                 |           | Ospedale Civile S. Liberatore-Atri                                                                                                                                                                             | Istituto Zooprofilattico Sperimentale dell'Abruzzo e Molise "G.Caporale"                                                                                                        | Lorusso A, Marcacci M, Di Domenico M, Curini V, Ancora M, Cammà C, Rinaldi A, Mangone I, Di Pasquale A, Puglia I, Savini G.                                                                                                                                        |
| EPI_ISL_529010, EPI_ISL_529011, EPI_ISL_529012                                                                                                                                                                                                                                                                                                                                                                                                                                                                                                                                                                                                                                                                                                                                                                                                                                                                                                                                                                                                                                                                                                                                                                                                                                                                                                                                                                                                                                                                                                                                                                                                                                                                                                                                                                                                                                                                                                                                                                                                                                                                                                                                                                                                                                                                                                                                                                                                                                                                                                                                                                                                                                                                                                                                                                                                                                                                                                                                                                                 |           | Servizio Igiene Epidemiologia e Sanità Pubblica (SIESP)-L'Aquila                                                                                                                                               | Istituto Zooprofilattico Sperimentale dell'Abruzzo e Molise "G.Caporale"                                                                                                        | Lorusso A, Marcacci M, Di Domenico M, Curini V, Ancora M, Cammà C, Rinaldi A, Mangone I, Di Pasquale A, Puglia I, Savini G.                                                                                                                                        |
| EPI_ISL_529013                                                                                                                                                                                                                                                                                                                                                                                                                                                                                                                                                                                                                                                                                                                                                                                                                                                                                                                                                                                                                                                                                                                                                                                                                                                                                                                                                                                                                                                                                                                                                                                                                                                                                                                                                                                                                                                                                                                                                                                                                                                                                                                                                                                                                                                                                                                                                                                                                                                                                                                                                                                                                                                                                                                                                                                                                                                                                                                                                                                                                 |           | Presidio Ospedaliero "S.Filippo e Nicola"-Avezzano                                                                                                                                                             | Istituto Zooprofilattico Sperimentale dell'Abruzzo e Molise "G.Caporale"                                                                                                        | Lorusso A, Marcacci M, Di Domenico M, Curini V, Ancora M, Cammà C, Rinaldi A, Mangone I, Di Pasquale A, Puglia I, Savini G.                                                                                                                                        |
| EPI_ISL_529014, EPI_ISL_529015                                                                                                                                                                                                                                                                                                                                                                                                                                                                                                                                                                                                                                                                                                                                                                                                                                                                                                                                                                                                                                                                                                                                                                                                                                                                                                                                                                                                                                                                                                                                                                                                                                                                                                                                                                                                                                                                                                                                                                                                                                                                                                                                                                                                                                                                                                                                                                                                                                                                                                                                                                                                                                                                                                                                                                                                                                                                                                                                                                                                 |           | Ospedale "Ss. Annunziata"                                                                                                                                                                                      | Istituto Zooprofilattico Sperimentale dell'Abruzzo e Molise "G.Caporale"                                                                                                        | Lorusso A, Marcacci M, Di Domenico M, Curini V, Ancora M, Cammà C, Rinaldi A, Mangone I, Di Pasquale A, Puglia I, Savini G.                                                                                                                                        |
| EPI_ISL_529016                                                                                                                                                                                                                                                                                                                                                                                                                                                                                                                                                                                                                                                                                                                                                                                                                                                                                                                                                                                                                                                                                                                                                                                                                                                                                                                                                                                                                                                                                                                                                                                                                                                                                                                                                                                                                                                                                                                                                                                                                                                                                                                                                                                                                                                                                                                                                                                                                                                                                                                                                                                                                                                                                                                                                                                                                                                                                                                                                                                                                 |           | Ospedale SS Annunziata-Sulmona                                                                                                                                                                                 | Istituto Zooprofilattico Sperimentale dell'Abruzzo e Molise "G.Caporale"                                                                                                        | Lorusso A, Marcacci M, Di Domenico M, Curini V, Ancora M, Cammà C, Rinaldi A, Mangone I, Di Pasquale A, Puglia I, Savini G.                                                                                                                                        |
| EPI_ISL_529018                                                                                                                                                                                                                                                                                                                                                                                                                                                                                                                                                                                                                                                                                                                                                                                                                                                                                                                                                                                                                                                                                                                                                                                                                                                                                                                                                                                                                                                                                                                                                                                                                                                                                                                                                                                                                                                                                                                                                                                                                                                                                                                                                                                                                                                                                                                                                                                                                                                                                                                                                                                                                                                                                                                                                                                                                                                                                                                                                                                                                 |           | Ospedale "Giuseppe Mazzini"-Teramo                                                                                                                                                                             | Istituto Zooprofilattico Sperimentale dell'Abruzzo e Molise "G.Caporale"                                                                                                        | Lorusso A, Marcacci M, Di Domenico M, Curini V, Ancora M, Cammà C, Rinaldi A, Mangone I, Di Pasquale A, Puglia I, Savini G.                                                                                                                                        |
| EPI_ISL_529019                                                                                                                                                                                                                                                                                                                                                                                                                                                                                                                                                                                                                                                                                                                                                                                                                                                                                                                                                                                                                                                                                                                                                                                                                                                                                                                                                                                                                                                                                                                                                                                                                                                                                                                                                                                                                                                                                                                                                                                                                                                                                                                                                                                                                                                                                                                                                                                                                                                                                                                                                                                                                                                                                                                                                                                                                                                                                                                                                                                                                 |           | RSA/RP Villa San Giovanni - Gruppo Edos                                                                                                                                                                        | Istituto Zooprofilattico Sperimentale dell'Abruzzo e Molise "G.Caporale"                                                                                                        | Lorusso A, Marcacci M, Di Domenico M, Curini V, Ancora M, Cammà C, Rinaldi A, Mangone I, Di Pasquale A, Puglia I, Savini G.                                                                                                                                        |
| EPI_ISL_529020, EPI_ISL_529021                                                                                                                                                                                                                                                                                                                                                                                                                                                                                                                                                                                                                                                                                                                                                                                                                                                                                                                                                                                                                                                                                                                                                                                                                                                                                                                                                                                                                                                                                                                                                                                                                                                                                                                                                                                                                                                                                                                                                                                                                                                                                                                                                                                                                                                                                                                                                                                                                                                                                                                                                                                                                                                                                                                                                                                                                                                                                                                                                                                                 |           | Ospedale Civile S. Liberatore-Atri                                                                                                                                                                             | Istituto Zooprofilattico Sperimentale dell'Abruzzo e Molise "G.Caporale"                                                                                                        | Lorusso A, Marcacci M, Di Domenico M, Curini V, Ancora M, Cammà C, Rinaldi A, Mangone I, Di Pasquale A, Puglia I, Savini G.                                                                                                                                        |
| EPI_ISL_529022                                                                                                                                                                                                                                                                                                                                                                                                                                                                                                                                                                                                                                                                                                                                                                                                                                                                                                                                                                                                                                                                                                                                                                                                                                                                                                                                                                                                                                                                                                                                                                                                                                                                                                                                                                                                                                                                                                                                                                                                                                                                                                                                                                                                                                                                                                                                                                                                                                                                                                                                                                                                                                                                                                                                                                                                                                                                                                                                                                                                                 |           | Ospedale "Ss. Annunziata"                                                                                                                                                                                      | Istituto Zooprofilattico Sperimentale dell'Abruzzo e Molise "G.Caporale"                                                                                                        | Lorusso A, Marcacci M, Di Domenico M, Curini V, Ancora M, Cammà C, Rinaldi A, Mangone I, Di Pasquale A, Puglia I, Savini G.                                                                                                                                        |
| EPI_ISL_529026                                                                                                                                                                                                                                                                                                                                                                                                                                                                                                                                                                                                                                                                                                                                                                                                                                                                                                                                                                                                                                                                                                                                                                                                                                                                                                                                                                                                                                                                                                                                                                                                                                                                                                                                                                                                                                                                                                                                                                                                                                                                                                                                                                                                                                                                                                                                                                                                                                                                                                                                                                                                                                                                                                                                                                                                                                                                                                                                                                                                                 |           | Ospedale "Giuseppe Mazzini"-Teramo                                                                                                                                                                             | Istituto Zooprofilattico Sperimentale dell'Abruzzo e Molise "G.Caporale"                                                                                                        | Lorusso A, Marcacci M, Di Domenico M, Curini V, Ancora M, Cammà C, Rinaldi A, Mangone I, Di Pasquale A, Puglia I, Savini G.                                                                                                                                        |
| EPI_ISL_529031                                                                                                                                                                                                                                                                                                                                                                                                                                                                                                                                                                                                                                                                                                                                                                                                                                                                                                                                                                                                                                                                                                                                                                                                                                                                                                                                                                                                                                                                                                                                                                                                                                                                                                                                                                                                                                                                                                                                                                                                                                                                                                                                                                                                                                                                                                                                                                                                                                                                                                                                                                                                                                                                                                                                                                                                                                                                                                                                                                                                                 |           | Central Molecular Microbiology Laboratory, Clinical and Chemical Pathology Department, Faculty of Medicine, CAIRO UNIVERSITY                                                                                   | Next Generation Sequencing Reference Laboratory, Faculty of Medicine, Cairo University and The Center for Genome and Microbiome Research, Faculty of Pharmacy, CAIRO UNIVERSITY | May Sherif Soliman, May Abdelfattah, Ramy Karam Aziz                                                                                                                                                                                                               |
| EPI_ISL_529032                                                                                                                                                                                                                                                                                                                                                                                                                                                                                                                                                                                                                                                                                                                                                                                                                                                                                                                                                                                                                                                                                                                                                                                                                                                                                                                                                                                                                                                                                                                                                                                                                                                                                                                                                                                                                                                                                                                                                                                                                                                                                                                                                                                                                                                                                                                                                                                                                                                                                                                                                                                                                                                                                                                                                                                                                                                                                                                                                                                                                 |           | Central Molecular Microbiology Laboratory and Next Generation Sequencing Reference Laboratory, Clinical and Chemical Pathology Department, Faculty of Medicine, CAIRO UNIVERSITY                               | Next Generation Sequencing Reference Laboratory, Faculty of Medicine, CAIRO UNIVERSITY and The Center for Genome and Microbiome Research, Faculty of Pharmacy, CAIRO UNIVERSITY | May Sherif Soliman, May Abdelfattah, Ramy Karam Aziz                                                                                                                                                                                                               |
| EPI_ISL_529035, EPI_ISL_529036                                                                                                                                                                                                                                                                                                                                                                                                                                                                                                                                                                                                                                                                                                                                                                                                                                                                                                                                                                                                                                                                                                                                                                                                                                                                                                                                                                                                                                                                                                                                                                                                                                                                                                                                                                                                                                                                                                                                                                                                                                                                                                                                                                                                                                                                                                                                                                                                                                                                                                                                                                                                                                                                                                                                                                                                                                                                                                                                                                                                 |           | Wadsworth Center, New York State Department of Health                                                                                                                                                          | Wadsworth Center, New York State Department of Health                                                                                                                           | Kirsten St. George, Daryl M. Lamson, Sara Griesemer, Jonathan Plitnick, Navjot Singh, Matthew D. Shudt, Erica Lasek-Nesselquist                                                                                                                                    |
| EPI_ISL_529138                                                                                                                                                                                                                                                                                                                                                                                                                                                                                                                                                                                                                                                                                                                                                                                                                                                                                                                                                                                                                                                                                                                                                                                                                                                                                                                                                                                                                                                                                                                                                                                                                                                                                                                                                                                                                                                                                                                                                                                                                                                                                                                                                                                                                                                                                                                                                                                                                                                                                                                                                                                                                                                                                                                                                                                                                                                                                                                                                                                                                 |           | RSAL Dr. Ramealan Surabaya                                                                                                                                                                                     | Institute of Tropical Disease, Universitas Airlangga                                                                                                                            | Jezy R Dewantari, Rima R Prasetya, Krisnoadi Rahardjo, Aldise M Nastro, Radito Soesanto, Gatot Soegiarto, Laksmi Wulandari, Retno A Setyoningrum, Resti Yudhawati, Yohko K Shimizu, Mitsuhiro Nishimura, Yasuko Mori, Soetjipito, Kazufumi Shimizu, Maria I Lusida |
| EPI_ISL_529720, EPI_ISL_529721, EPI_ISL_529723, EPI_ISL_529724, EPI_ISL_529726, EPI_ISL_529728, EPI_ISL_529729, EPI_ISL_529730, EPI_ISL_529731, EPI_ISL_529732, EPI_ISL_529733, EPI_ISL_529734, EPI_ISL_529735, EPI_ISL_529736, EPI_ISL_529737, EPI_ISL_529738, EPI_ISL_529739, EPI_ISL_529740, EPI_ISL_529741, EPI_ISL_529742, EPI_ISL_529743, EPI_ISL_529744, EPI_ISL_529745, EPI_ISL_529746, EPI_ISL_529747, EPI_ISL_529748, EPI_ISL_529749, EPI_ISL_529750, EPI_ISL_529751, EPI_ISL_529752, EPI_ISL_529753, EPI_ISL_529754, EPI_ISL_529755, EPI_ISL_529756, EPI_ISL_529757, EPI_ISL_529758, EPI_ISL_529759, EPI_ISL_529760, EPI_ISL_529761, EPI_ISL_529762, EPI_ISL_529763, EPI_ISL_529764, EPI_ISL_529765, EPI_ISL_529766, EPI_ISL_529767, EPI_ISL_529768, EPI_ISL_529769, EPI_ISL_529770, EPI_ISL_529771, EPI_ISL_529772, EPI_ISL_529773, EPI_ISL_529774, EPI_ISL_529775, EPI_ISL_529776, EPI_ISL_529777, EPI_ISL_529778, EPI_ISL_529779, EPI_ISL_529780, EPI_ISL_529781, EPI_ISL_529782, EPI_ISL_529783, EPI_ISL_529784, EPI_ISL_529785, EPI_ISL_529786, EPI_ISL_529787, EPI_ISL_529788, EPI_ISL_529789, EPI_ISL_529790, EPI_ISL_529791, EPI_ISL_529792, EPI_ISL_529793, EPI_ISL_529794, EPI_ISL_529795, EPI_ISL_529796, EPI_ISL_529797, EPI_ISL_529798, EPI_ISL_529799, EPI_ISL_529800, EPI_ISL_529801, EPI_ISL_529802                                                                                                                                                                                                                                                                                                                                                                                                                                                                                                                                                                                                                                                                                                                                                                                                                                                                                                                                                                                                                                                                                                                                                                                                                                                                                                                                                                                                                                                                                                                                                                                                                                                                                                 | see above | NHLS-IALCH                                                                                                                                                                                                     | KRISP, KZN Research Innovation and Sequencing Platform                                                                                                                          | Giandhari J, Pillay S, Lessells R, Mdlalose K, York D, Khan S, Tegally H, Wilkinson E, de Oliveira T                                                                                                                                                               |
| EPI_ISL_529961                                                                                                                                                                                                                                                                                                                                                                                                                                                                                                                                                                                                                                                                                                                                                                                                                                                                                                                                                                                                                                                                                                                                                                                                                                                                                                                                                                                                                                                                                                                                                                                                                                                                                                                                                                                                                                                                                                                                                                                                                                                                                                                                                                                                                                                                                                                                                                                                                                                                                                                                                                                                                                                                                                                                                                                                                                                                                                                                                                                                                 |           | Husada Utama Hospital                                                                                                                                                                                          | Institute of Tropical Disease, Universitas Airlangga                                                                                                                            | Krisnoadi Rahardjo, Aldise M Nastro, Jezy R Dewantari, Rima R Prasetya, Didi Dewanto, Gatot Soegiarto, Laksmi Wulandari, Retno A Setyoningrum, Resti Yudhawati, Yohko K Shimizu, Mitsuhiro Nishimura, Yasuko Mori, Soetjipito, Kazufumi Shimizu, Maria I Lusida    |
| EPI_ISL_529962                                                                                                                                                                                                                                                                                                                                                                                                                                                                                                                                                                                                                                                                                                                                                                                                                                                                                                                                                                                                                                                                                                                                                                                                                                                                                                                                                                                                                                                                                                                                                                                                                                                                                                                                                                                                                                                                                                                                                                                                                                                                                                                                                                                                                                                                                                                                                                                                                                                                                                                                                                                                                                                                                                                                                                                                                                                                                                                                                                                                                 |           | Universitas Airlangga Hospital                                                                                                                                                                                 | Institute of Tropical Disease, Universitas Airlangga                                                                                                                            | Jezy R Dewantari, Rima R Prasetya, Krisnoadi Rahardjo, Aldise M Nastro, Nasonrudin, Gatot Soegiarto, Laksmi Wulandari, Retno A Setyoningrum, Resti Yudhawati, Yohko K Shimizu, Mitsuhiro Nishimura, Yasuko Mori, Soetjipito, Kazufumi Shimizu, Maria I Lusida      |
| EPI_ISL_529963                                                                                                                                                                                                                                                                                                                                                                                                                                                                                                                                                                                                                                                                                                                                                                                                                                                                                                                                                                                                                                                                                                                                                                                                                                                                                                                                                                                                                                                                                                                                                                                                                                                                                                                                                                                                                                                                                                                                                                                                                                                                                                                                                                                                                                                                                                                                                                                                                                                                                                                                                                                                                                                                                                                                                                                                                                                                                                                                                                                                                 |           | Universitas Airlangga Hospital                                                                                                                                                                                 | Institute of Tropical Disease, Universitas Airlangga                                                                                                                            | Rima R Prasetya, Krisnoadi Rahardjo, Aldise M Nastro, Nasonrudin, Gatot Soegiarto, Laksmi Wulandari, Retno A Setyoningrum, Resti Yudhawati, Yohko K Shimizu, Mitsuhiro Nishimura, Yasuko Mori, Soetjipito, Kazufumi Shimizu, Maria I Lusida                        |
| EPI_ISL_529964                                                                                                                                                                                                                                                                                                                                                                                                                                                                                                                                                                                                                                                                                                                                                                                                                                                                                                                                                                                                                                                                                                                                                                                                                                                                                                                                                                                                                                                                                                                                                                                                                                                                                                                                                                                                                                                                                                                                                                                                                                                                                                                                                                                                                                                                                                                                                                                                                                                                                                                                                                                                                                                                                                                                                                                                                                                                                                                                                                                                                 |           | RSUD Bangil Pasuruan                                                                                                                                                                                           | Institute of Tropical Disease, Universitas Airlangga                                                                                                                            | Aldise M Nastro, Jezy R Dewantari, Rima R Prasetya, Krisnoadi Rahardjo, Arma Roosalia, Gatot Soegiarto, Laksmi Wulandari, Retno A Setyoningrum, Resti Yudhawati, Yohko K Shimizu, Mitsuhiro Nishimura, Yasuko Mori, Soetjipito, Kazufumi Shimizu, Maria I Lusida   |
| EPI_ISL_529965                                                                                                                                                                                                                                                                                                                                                                                                                                                                                                                                                                                                                                                                                                                                                                                                                                                                                                                                                                                                                                                                                                                                                                                                                                                                                                                                                                                                                                                                                                                                                                                                                                                                                                                                                                                                                                                                                                                                                                                                                                                                                                                                                                                                                                                                                                                                                                                                                                                                                                                                                                                                                                                                                                                                                                                                                                                                                                                                                                                                                 |           | RSUD Dr. Soetomo                                                                                                                                                                                               | Institute of Tropical Disease, Universitas Airlangga                                                                                                                            | Krisnoadi Rahardjo, Aldise M Nastro, Jezy R Dewantari, Rima R Prasetya, Joni Wahyuhadi, Gatot Soegiarto, Laksmi Wulandari, Retno A Setyoningrum, Resti Yudhawati, Yohko K Shimizu, Mitsuhiro Nishimura, Yasuko Mori, Soetjipito, Kazufumi Shimizu, Maria I Lusida  |
| EPI_ISL_529966                                                                                                                                                                                                                                                                                                                                                                                                                                                                                                                                                                                                                                                                                                                                                                                                                                                                                                                                                                                                                                                                                                                                                                                                                                                                                                                                                                                                                                                                                                                                                                                                                                                                                                                                                                                                                                                                                                                                                                                                                                                                                                                                                                                                                                                                                                                                                                                                                                                                                                                                                                                                                                                                                                                                                                                                                                                                                                                                                                                                                 |           | RSUD Sidoarjo                                                                                                                                                                                                  | Institute of Tropical Disease, Universitas Airlangga                                                                                                                            | Kazufumi Shimizu, Krisnoadi Rahardjo, Aldise M Nastro, Jezy R Dewantari, Rima R Prasetya, Atok Irawan, Gatot Soegiarto, Laksmi Wulandari, Retno A Setyoningrum, Resti Yudhawati, Yohko K Shimizu, Mitsuhiro Nishimura, Yasuko Mori, Soetjipito, Maria I Lusida     |
| EPI_ISL_529967                                                                                                                                                                                                                                                                                                                                                                                                                                                                                                                                                                                                                                                                                                                                                                                                                                                                                                                                                                                                                                                                                                                                                                                                                                                                                                                                                                                                                                                                                                                                                                                                                                                                                                                                                                                                                                                                                                                                                                                                                                                                                                                                                                                                                                                                                                                                                                                                                                                                                                                                                                                                                                                                                                                                                                                                                                                                                                                                                                                                                 |           | RSUD Sidoarjo                                                                                                                                                                                                  | Institute of Tropical Disease, Universitas Airlangga                                                                                                                            | Aldise M Nastro, Jezy R Dewantari, Rima R Prasetya, Krisnoadi Rahardjo, Atok Irawan, Gatot Soegiarto, Laksmi Wulandari, Retno A Setyoningrum, Resti Yudhawati, Yohko K Shimizu, Mitsuhiro Nishimura, Yasuko Mori, Soetjipito, Kazufumi Shimizu, Maria I Lusida     |
| EPI_ISL_530347                                                                                                                                                                                                                                                                                                                                                                                                                                                                                                                                                                                                                                                                                                                                                                                                                                                                                                                                                                                                                                                                                                                                                                                                                                                                                                                                                                                                                                                                                                                                                                                                                                                                                                                                                                                                                                                                                                                                                                                                                                                                                                                                                                                                                                                                                                                                                                                                                                                                                                                                                                                                                                                                                                                                                                                                                                                                                                                                                                                                                 |           | The National Institute of Public Health                                                                                                                                                                        | State Veterinary Institute Prague                                                                                                                                               | Nagy,AjJirincova,H,Novakova,L,Tmka,D,Vecerova,J                                                                                                                                                                                                                    |
| EPI_ISL_530348, EPI_ISL_530349, EPI_ISL_530350                                                                                                                                                                                                                                                                                                                                                                                                                                                                                                                                                                                                                                                                                                                                                                                                                                                                                                                                                                                                                                                                                                                                                                                                                                                                                                                                                                                                                                                                                                                                                                                                                                                                                                                                                                                                                                                                                                                                                                                                                                                                                                                                                                                                                                                                                                                                                                                                                                                                                                                                                                                                                                                                                                                                                                                                                                                                                                                                                                                 |           | The National Institute of Public Health                                                                                                                                                                        | State Veterinary Institute Prague                                                                                                                                               | Nagy,AjJirincova,H,Novakova,L,Tmka,D,Vecerova,J                                                                                                                                                                                                                    |
| EPI_ISL_534311                                                                                                                                                                                                                                                                                                                                                                                                                                                                                                                                                                                                                                                                                                                                                                                                                                                                                                                                                                                                                                                                                                                                                                                                                                                                                                                                                                                                                                                                                                                                                                                                                                                                                                                                                                                                                                                                                                                                                                                                                                                                                                                                                                                                                                                                                                                                                                                                                                                                                                                                                                                                                                                                                                                                                                                                                                                                                                                                                                                                                 |           | UPA II 26 de Agosto                                                                                                                                                                                            | Instituto Adolfo Lutz, Interdisciplinary Procedures Center, Strategic Laboratory                                                                                                | Claudio Tavares Sacchi, Claudia Regina Gonçalves, Erica Valessa Ramos Gomes                                                                                                                                                                                        |
| EPI_ISL_534312                                                                                                                                                                                                                                                                                                                                                                                                                                                                                                                                                                                                                                                                                                                                                                                                                                                                                                                                                                                                                                                                                                                                                                                                                                                                                                                                                                                                                                                                                                                                                                                                                                                                                                                                                                                                                                                                                                                                                                                                                                                                                                                                                                                                                                                                                                                                                                                                                                                                                                                                                                                                                                                                                                                                                                                                                                                                                                                                                                                                                 |           | Distrito Sanitario Sul                                                                                                                                                                                         | Instituto Adolfo Lutz, Interdisciplinary Procedures Center, Strategic Laboratory                                                                                                | Claudio Tavares Sacchi, Claudia Regina Gonçalves, Erica Valessa Ramos Gomes                                                                                                                                                                                        |
| EPI_ISL_534313                                                                                                                                                                                                                                                                                                                                                                                                                                                                                                                                                                                                                                                                                                                                                                                                                                                                                                                                                                                                                                                                                                                                                                                                                                                                                                                                                                                                                                                                                                                                                                                                                                                                                                                                                                                                                                                                                                                                                                                                                                                                                                                                                                                                                                                                                                                                                                                                                                                                                                                                                                                                                                                                                                                                                                                                                                                                                                                                                                                                                 |           | Hospital da Sta Casa de Sto Amaro                                                                                                                                                                              | Instituto Adolfo Lutz, Interdisciplinary Procedures Center, Strategic Laboratory                                                                                                | Claudio Tavares Sacchi, Claudia Regina Gonçalves, Erica Valessa Ramos Gomes                                                                                                                                                                                        |
| EPI_ISL_534314                                                                                                                                                                                                                                                                                                                                                                                                                                                                                                                                                                                                                                                                                                                                                                                                                                                                                                                                                                                                                                                                                                                                                                                                                                                                                                                                                                                                                                                                                                                                                                                                                                                                                                                                                                                                                                                                                                                                                                                                                                                                                                                                                                                                                                                                                                                                                                                                                                                                                                                                                                                                                                                                                                                                                                                                                                                                                                                                                                                                                 |           | Hospital Universitario da USP de SP                                                                                                                                                                            | Instituto Adolfo Lutz, Interdisciplinary Procedures Center, Strategic Laboratory                                                                                                | Claudio Tavares Sacchi, Claudia Regina Gonçalves, Erica Valessa Ramos Gomes                                                                                                                                                                                        |
| EPI_ISL_534315                                                                                                                                                                                                                                                                                                                                                                                                                                                                                                                                                                                                                                                                                                                                                                                                                                                                                                                                                                                                                                                                                                                                                                                                                                                                                                                                                                                                                                                                                                                                                                                                                                                                                                                                                                                                                                                                                                                                                                                                                                                                                                                                                                                                                                                                                                                                                                                                                                                                                                                                                                                                                                                                                                                                                                                                                                                                                                                                                                                                                 |           | Serviço de Verificação de Óbitos SVO Guarulhos                                                                                                                                                                 | Instituto Adolfo Lutz, Interdisciplinary Procedures Center, Strategic Laboratory                                                                                                | Claudio Tavares Sacchi, Claudia Regina Gonçalves, Erica Valessa Ramos Gomes                                                                                                                                                                                        |
| EPI_ISL_534316                                                                                                                                                                                                                                                                                                                                                                                                                                                                                                                                                                                                                                                                                                                                                                                                                                                                                                                                                                                                                                                                                                                                                                                                                                                                                                                                                                                                                                                                                                                                                                                                                                                                                                                                                                                                                                                                                                                                                                                                                                                                                                                                                                                                                                                                                                                                                                                                                                                                                                                                                                                                                                                                                                                                                                                                                                                                                                                                                                                                                 |           | OS Mun Santana Lauro Ribas Braga                                                                                                                                                                               | Instituto Adolfo Lutz, Interdisciplinary Procedures Center, Strategic Laboratory                                                                                                | Claudio Tavares Sacchi, Claudia Regina Gonçalves, Erica Valessa Ramos Gomes                                                                                                                                                                                        |
| EPI_ISL_534317                                                                                                                                                                                                                                                                                                                                                                                                                                                                                                                                                                                                                                                                                                                                                                                                                                                                                                                                                                                                                                                                                                                                                                                                                                                                                                                                                                                                                                                                                                                                                                                                                                                                                                                                                                                                                                                                                                                                                                                                                                                                                                                                                                                                                                                                                                                                                                                                                                                                                                                                                                                                                                                                                                                                                                                                                                                                                                                                                                                                                 |           | Hospital Geral de Itapevi                                                                                                                                                                                      | Instituto Adolfo Lutz, Interdisciplinary Procedures Center, Strategic Laboratory                                                                                                | Claudio Tavares Sacchi, Claudia Regina Gonçalves, Erica Valessa Ramos Gomes                                                                                                                                                                                        |
| EPI_ISL_534318                                                                                                                                                                                                                                                                                                                                                                                                                                                                                                                                                                                                                                                                                                                                                                                                                                                                                                                                                                                                                                                                                                                                                                                                                                                                                                                                                                                                                                                                                                                                                                                                                                                                                                                                                                                                                                                                                                                                                                                                                                                                                                                                                                                                                                                                                                                                                                                                                                                                                                                                                                                                                                                                                                                                                                                                                                                                                                                                                                                                                 |           | Hospital Municipal Antonio Giglio                                                                                                                                                                              | Instituto Adolfo Lutz, Interdisciplinary Procedures Center, Strategic Laboratory                                                                                                | Claudio Tavares Sacchi, Claudia Regina Gonçalves, Erica Valessa Ramos Gomes                                                                                                                                                                                        |
| EPI_ISL_534319, EPI_ISL_534320                                                                                                                                                                                                                                                                                                                                                                                                                                                                                                                                                                                                                                                                                                                                                                                                                                                                                                                                                                                                                                                                                                                                                                                                                                                                                                                                                                                                                                                                                                                                                                                                                                                                                                                                                                                                                                                                                                                                                                                                                                                                                                                                                                                                                                                                                                                                                                                                                                                                                                                                                                                                                                                                                                                                                                                                                                                                                                                                                                                                 |           | Hospital do Serv Pub ESTAFCO Morato de Oliveira                                                                                                                                                                | Instituto Adolfo Lutz, Interdisciplinary Procedures Center, Strategic Laboratory                                                                                                | Claudio Tavares Sacchi, Claudia Regina Gonçalves, Erica Valessa Ramos Gomes                                                                                                                                                                                        |
| EPI_ISL_534321                                                                                                                                                                                                                                                                                                                                                                                                                                                                                                                                                                                                                                                                                                                                                                                                                                                                                                                                                                                                                                                                                                                                                                                                                                                                                                                                                                                                                                                                                                                                                                                                                                                                                                                                                                                                                                                                                                                                                                                                                                                                                                                                                                                                                                                                                                                                                                                                                                                                                                                                                                                                                                                                                                                                                                                                                                                                                                                                                                                                                 |           | PS e Maternidade Nair Fonseca Leitao Arantes                                                                                                                                                                   | Instituto Adolfo Lutz, Interdisciplinary Procedures Center, Strategic Laboratory                                                                                                | Claudio Tavares Sacchi, Claudia Regina Gonçalves, Erica Valessa Ramos Gomes                                                                                                                                                                                        |
| EPI_ISL_534322                                                                                                                                                                                                                                                                                                                                                                                                                                                                                                                                                                                                                                                                                                                                                                                                                                                                                                                                                                                                                                                                                                                                                                                                                                                                                                                                                                                                                                                                                                                                                                                                                                                                                                                                                                                                                                                                                                                                                                                                                                                                                                                                                                                                                                                                                                                                                                                                                                                                                                                                                                                                                                                                                                                                                                                                                                                                                                                                                                                                                 |           | PS Mun Julio Tupia                                                                                                                                                                                             | Instituto Adolfo Lutz, Interdisciplinary Procedures Center, Strategic Laboratory                                                                                                | Claudio Tavares Sacchi, Claudia Regina Gonçalves, Erica Valessa Ramos Gomes                                                                                                                                                                                        |
| EPI_ISL_534323                                                                                                                                                                                                                                                                                                                                                                                                                                                                                                                                                                                                                                                                                                                                                                                                                                                                                                                                                                                                                                                                                                                                                                                                                                                                                                                                                                                                                                                                                                                                                                                                                                                                                                                                                                                                                                                                                                                                                                                                                                                                                                                                                                                                                                                                                                                                                                                                                                                                                                                                                                                                                                                                                                                                                                                                                                                                                                                                                                                                                 |           | Hospital e Pronto Socorro Comunitario Vila Yolanda                                                                                                                                                             | Instituto Adolfo Lutz, Interdisciplinary Procedures Center, Strategic Laboratory                                                                                                | Claudio Tavares Sacchi, Claudia Regina Gonçalves, Erica Valessa Ramos Gomes                                                                                                                                                                                        |
| EPI_ISL_534324                                                                                                                                                                                                                                                                                                                                                                                                                                                                                                                                                                                                                                                                                                                                                                                                                                                                                                                                                                                                                                                                                                                                                                                                                                                                                                                                                                                                                                                                                                                                                                                                                                                                                                                                                                                                                                                                                                                                                                                                                                                                                                                                                                                                                                                                                                                                                                                                                                                                                                                                                                                                                                                                                                                                                                                                                                                                                                                                                                                                                 |           | Hospital Mun Ver Jose Storopoli                                                                                                                                                                                | Instituto Adolfo Lutz, Interdisciplinary Procedures Center, Strategic Laboratory                                                                                                | Claudio Tavares Sacchi, Claudia Regina Gonçalves, Erica Valessa Ramos Gomes                                                                                                                                                                                        |
| EPI_ISL_534325                                                                                                                                                                                                                                                                                                                                                                                                                                                                                                                                                                                                                                                                                                                                                                                                                                                                                                                                                                                                                                                                                                                                                                                                                                                                                                                                                                                                                                                                                                                                                                                                                                                                                                                                                                                                                                                                                                                                                                                                                                                                                                                                                                                                                                                                                                                                                                                                                                                                                                                                                                                                                                                                                                                                                                                                                                                                                                                                                                                                                 |           | Unidade de Vigilancia em Saude de Guarulhos                                                                                                                                                                    | Instituto Adolfo Lutz, Interdisciplinary Procedures Center, Strategic Laboratory                                                                                                | Claudio Tavares Sacchi, Claudia Regina Gonçalves, Erica Valessa Ramos Gomes                                                                                                                                                                                        |
| EPI_ISL_534326                                                                                                                                                                                                                                                                                                                                                                                                                                                                                                                                                                                                                                                                                                                                                                                                                                                                                                                                                                                                                                                                                                                                                                                                                                                                                                                                                                                                                                                                                                                                                                                                                                                                                                                                                                                                                                                                                                                                                                                                                                                                                                                                                                                                                                                                                                                                                                                                                                                                                                                                                                                                                                                                                                                                                                                                                                                                                                                                                                                                                 |           | Notre Dame Intermedica Saude AS                                                                                                                                                                                | Instituto Adolfo Lutz, Interdisciplinary Procedures Center, Strategic Laboratory                                                                                                | Claudio Tavares Sacchi, Claudia Regina Gonçalves, Erica Valessa Ramos Gomes                                                                                                                                                                                        |
| EPI_ISL_534336                                                                                                                                                                                                                                                                                                                                                                                                                                                                                                                                                                                                                                                                                                                                                                                                                                                                                                                                                                                                                                                                                                                                                                                                                                                                                                                                                                                                                                                                                                                                                                                                                                                                                                                                                                                                                                                                                                                                                                                                                                                                                                                                                                                                                                                                                                                                                                                                                                                                                                                                                                                                                                                                                                                                                                                                                                                                                                                                                                                                                 |           | Department of Laboratory Medicine, National Taiwan University Hospital                                                                                                                                         | Microbial Genomics Core Lab, National Taiwan University Centers of Genomic and Precision Medicine                                                                               | Shiou-Hwei Yeh, You-Yu Lin, Ya-Yun Lai, Chiao-Ling Li, Shan-Chwen Chang, Pei-jer Chen, Sui-Yuan Chang                                                                                                                                                              |
| EPI_ISL_534337, EPI_ISL_534338, EPI_ISL_534339, EPI_ISL_534340, EPI_ISL_534341, EPI_ISL_534342, EPI_ISL_534343, EPI_ISL_534344, EPI_ISL_534345                                                                                                                                                                                                                                                                                                                                                                                                                                                                                                                                                                                                                                                                                                                                                                                                                                                                                                                                                                                                                                                                                                                                                                                                                                                                                                                                                                                                                                                                                                                                                                                                                                                                                                                                                                                                                                                                                                                                                                                                                                                                                                                                                                                                                                                                                                                                                                                                                                                                                                                                                                                                                                                                                                                                                                                                                                                                                 |           | Molecular diagnostic laboratory of Federal Budget Institution of Science "Central Research Institute of Epidemiology" of The Federal Service on Customers' Rights Protection and Human Well-being Surveillance | Group of Genomics and Postgenomic Technologies of Central Research Institute of Epidemiology                                                                                    | Speranskaya AS, Kapteleva VV, Samoilov AE, Valдохina AV, Bulanenko VP, Bukharina A.Y., Tivanova EV, Shipulina OY, Akimkin VG                                                                                                                                       |
| EPI_ISL_534346, EPI_ISL_534347, EPI_ISL_534348, EPI_ISL_534349                                                                                                                                                                                                                                                                                                                                                                                                                                                                                                                                                                                                                                                                                                                                                                                                                                                                                                                                                                                                                                                                                                                                                                                                                                                                                                                                                                                                                                                                                                                                                                                                                                                                                                                                                                                                                                                                                                                                                                                                                                                                                                                                                                                                                                                                                                                                                                                                                                                                                                                                                                                                                                                                                                                                                                                                                                                                                                                                                                 |           | Molecular diagnostic laboratory of Federal Budget Institution of Science "Central Research Institute of Epidemiology" of The Federal Service on Customers' Rights Protection and Human Well-being Surveillance | Group of Genomics and Postgenomic Technologies of Central Research Institute of Epidemiology                                                                                    | Speranskaya AS, Kapteleva VV, Valдохina AV, Bulanenko VP, Samoilov AE, Korneenko EV, Tivanova EV, Shipulina OY, Akimkin VG                                                                                                                                         |
| EPI_ISL_535390, EPI_ISL_535392, EPI_ISL_535393, EPI_ISL_535394, EPI_ISL_535395, EPI_ISL_535396, EPI_ISL_535397, EPI_ISL_535398, EPI_ISL_535399, EPI_ISL_535400, EPI_ISL_535401, EPI_ISL_535402, EPI_ISL_535403, EPI_ISL_535404, EPI_ISL_535405, EPI_ISL_535406, EPI_ISL_535407, EPI_ISL_535408, EPI_ISL_535409, EPI_ISL_535410, EPI_ISL_535411, EPI_ISL_535412, EPI_ISL_535413, EPI_ISL_535414, EPI_ISL_535415, EPI_ISL_535416, EPI_ISL_535417, EPI_ISL_535418, EPI_ISL_535419, EPI_ISL_535420, EPI_ISL_535421, EPI_ISL_535422, EPI_ISL_535423, EPI_ISL_535424, EPI_ISL_535425, EPI_ISL_535426, EPI_ISL_535427, EPI_ISL_535428, EPI_ISL_535429, EPI_ISL_535430, EPI_ISL_535431, EPI_ISL_535432, EPI_ISL_535433, EPI_ISL_535434, EPI_ISL_535435, EPI_ISL_535436, EPI_ISL_535437, EPI_ISL_535438, EPI_ISL_535439, EPI_ISL_535440, EPI_ISL_535441, EPI_ISL_535442, EPI_ISL_535443, EPI_ISL_535444, EPI_ISL_535445, EPI_ISL_535446, EPI_ISL_535447, EPI_ISL_535448, EPI_ISL_535449, EPI_ISL_535450, EPI_ISL_535451, EPI_ISL_535452, EPI_ISL_535453, EPI_ISL_535454, EPI_ISL_535455, EPI_ISL_535456, EPI_ISL_535457, EPI_ISL_535458, EPI_ISL_535459, EPI_ISL_535460, EPI_ISL_535461, EPI_ISL_535462, EPI_ISL_535463, EPI_ISL_535464, EPI_ISL_535465, EPI_ISL_535466, EPI_ISL_535467, EPI_ISL_535468, EPI_ISL_535469, EPI_ISL_535470, EPI_ISL_535471, EPI_ISL_535472, EPI_ISL_535473, EPI_ISL_535474, EPI_ISL_535475, EPI_ISL_535476, EPI_ISL_535477, EPI_ISL_535478, EPI_ISL_535479, EPI_ISL_535480, EPI_ISL_535481, EPI_ISL_535482, EPI_ISL_535483, EPI_ISL_535484, EPI_ISL_535485, EPI_ISL_535486, EPI_ISL_535487, EPI_ISL_535488, EPI_ISL_535489, EPI_ISL_535490, EPI_ISL_535491, EPI_ISL_535492, EPI_ISL_535493, EPI_ISL_535494, EPI_ISL_535495, EPI_ISL_535496, EPI_ISL_535497, EPI_ISL_535498, EPI_ISL_535499, EPI_ISL_535500, EPI_ISL_535501, EPI_ISL_535502, EPI_ISL_535503, EPI_ISL_535504, EPI_ISL_535505, EPI_ISL_535506, EPI_ISL_535507, EPI_ISL_535508, EPI_ISL_535509, EPI_ISL_535510, EPI_ISL_535511, EPI_ISL_535512, EPI_ISL_535513, EPI_ISL_535514, EPI_ISL_535515, EPI_ISL_535516, EPI_ISL_535517, EPI_ISL_535518, EPI_ISL_535519, EPI_ISL_535520, EPI_ISL_535521, EPI_ISL_535522, EPI_ISL_535523, EPI_ISL_535524, EPI_ISL_535525, EPI_ISL_535526, EPI_ISL_535527, EPI_ISL_535528, EPI_ISL_535529, EPI_ISL_535530, EPI_ISL_535531, EPI_ISL_535532, EPI_ISL_535533, EPI_ISL_535534, EPI_ISL_535535, EPI_ISL_535536, EPI_ISL_535537, EPI_ISL_535538, EPI_ISL_535539, EPI_ISL_535540, EPI_ISL_535541, EPI_ISL_535542, EPI_ISL_535543, EPI_ISL_535544, EPI_ISL_535545, EPI_ISL_535546, EPI_ISL_535547, EPI_ISL_535548, EPI_ISL_535549, EPI_ISL_535550, EPI_ISL_535551, EPI_ISL_535552, EPI_ISL_535553, EPI_ISL_535554, EPI_ISL_535555, EPI_ISL_535556, EPI_ISL_535557, EPI_ISL_535558, EPI_ISL_535559, EPI_ISL_535560, EPI_ISL_535561, EPI_ISL_535562, EPI_ISL_535563, EPI_ISL_535564, EPI_ISL_535565, EPI_ISL_535566, EPI_ISL_535567, EPI_ISL_535568, EPI_ISL_535569, EPI_ISL_535570, EPI_ISL_535571, EPI_ISL_535572 | see above | NHLS-IALCH                                                                                                                                                                                                     | KRISP, KZN Research Innovation and Sequencing Platform                                                                                                                          | Giandhari J, Pillay S, Lessells R, Mdlalose K, York D, Khan S, Tegally H, Wilkinson E, de Oliveira T                                                                                                                                                               |
| EPI_ISL_535575                                                                                                                                                                                                                                                                                                                                                                                                                                                                                                                                                                                                                                                                                                                                                                                                                                                                                                                                                                                                                                                                                                                                                                                                                                                                                                                                                                                                                                                                                                                                                                                                                                                                                                                                                                                                                                                                                                                                                                                                                                                                                                                                                                                                                                                                                                                                                                                                                                                                                                                                                                                                                                                                                                                                                                                                                                                                                                                                                                                                                 |           | Hospital Universitari Germans Trias i Pujol(HUGTIP)/Fundació Lluïta contra la SIDA (FLSida)                                                                                                                    | IrsiCaixa AIDS Research Lab                                                                                                                                                     | Marc Noguera-Julian, Mariona Parera, Maria Pilar Armengol, Marta Massanella, Ester Ballana, Lidia Ruiz, Nuria Izquierdo, Jorge Carrillo, Roger Paredes, Julia Blanco, Joaquim Segalés, Bonaventura Clotet                                                          |
| EPI_ISL_536399                                                                                                                                                                                                                                                                                                                                                                                                                                                                                                                                                                                                                                                                                                                                                                                                                                                                                                                                                                                                                                                                                                                                                                                                                                                                                                                                                                                                                                                                                                                                                                                                                                                                                                                                                                                                                                                                                                                                                                                                                                                                                                                                                                                                                                                                                                                                                                                                                                                                                                                                                                                                                                                                                                                                                                                                                                                                                                                                                                                                                 |           | Laboratory of Immunovirology, Universidad de Antioquia                                                                                                                                                         | Instituto Nacional de Salud - Unidad de Secuenciación y Genómica                                                                                                                | Wbeimar Aguilar-Jimenez, Lizdany Flórez, Francisco J. Díaz, Katherine Laiton-Donato, Carlos Franco-Muñoz, Diego Álvarez-Díaz and Marcela Mercado-Reyes                                                                                                             |
| EPI_ISL_536411, EPI_ISL_536793                                                                                                                                                                                                                                                                                                                                                                                                                                                                                                                                                                                                                                                                                                                                                                                                                                                                                                                                                                                                                                                                                                                                                                                                                                                                                                                                                                                                                                                                                                                                                                                                                                                                                                                                                                                                                                                                                                                                                                                                                                                                                                                                                                                                                                                                                                                                                                                                                                                                                                                                                                                                                                                                                                                                                                                                                                                                                                                                                                                                 |           | Medtimes Molecular Laboratory                                                                                                                                                                                  | Medtimes Molecular Laboratory                                                                                                                                                   | Eric Chan, Winsome Wong, Jacqueline Tam, Isaac Chow                                                                                                                                                                                                                |
| EPI_ISL_538435, EPI_ISL_538436, EPI_ISL_538437, EPI_ISL_538438, EPI_ISL_538439, EPI_ISL_538440, EPI_ISL_538441, EPI_ISL_538442, EPI_ISL_538443, EPI_ISL_538444, EPI_ISL_538445, EPI_ISL_538446, EPI_ISL_538447, EPI_ISL_538448, EPI_ISL_538449, EPI_ISL_538450, EPI_ISL_538451, EPI_ISL_538452, EPI_ISL_538453, EPI_ISL_538454, EPI_ISL_538455, EPI_ISL_538456, EPI_ISL_538457, EPI_ISL_538458, EPI_ISL_538459, EPI_ISL_538460, EPI_ISL_538461, EPI_ISL_538462, EPI_ISL_538463, EPI_ISL_538464, EPI_ISL_538465, EPI_ISL_538466, EPI_ISL_538467, EPI_ISL_538468, EPI_ISL_538469, EPI_ISL_538470, EPI_ISL_538471, EPI_ISL_538472, EPI_ISL_538473, EPI_ISL_538474, EPI_ISL_538475, EPI_ISL_538476, EPI_ISL_538477, EPI_ISL_538478, EPI_ISL_538479, EPI_ISL_538480, EPI_ISL_538481, EPI_ISL_538482, EPI_ISL_538483, EPI_ISL_538484, EPI_ISL_538485, EPI_ISL_538486, EPI_ISL_538487, EPI_ISL_538488, EPI_ISL_538489, EPI_ISL_538490, EPI_ISL_538491, EPI_ISL_538492, EPI_ISL_538493, EPI_ISL_538494, EPI_ISL_538495, EPI_ISL_538496, EPI_ISL_538497, EPI_ISL_538498, EPI_ISL_538499, EPI_ISL_538500, EPI_ISL_538501, EPI_ISL_538502, EPI_ISL_538503, EPI_ISL_538504, EPI_ISL_538505, EPI_ISL_538506, EPI_ISL_538507, EPI_ISL_538508, EPI_ISL_538509, EPI_ISL_538510, EPI_ISL_538511, EPI_ISL_538512, EPI_ISL_538513, EPI_ISL_538514, EPI_ISL_538515, EPI_ISL_538516, EPI_ISL_538517, EPI_ISL_538518, EPI_ISL_538519, EPI_ISL_538520, EPI_ISL_538521, EPI_ISL_538522, EPI_ISL_538523, EPI_ISL_538524, EPI_ISL_538525, EPI_ISL_538526, EPI_ISL_538527, EPI_ISL_538528, EPI_ISL_538529, EPI_ISL_538530, EPI_ISL_538531, EPI_ISL_538532, EPI_ISL_538533, EPI_ISL_538534, EPI_ISL_538535, EPI_ISL_538536, EPI_ISL_538537, EPI_ISL_538538, EPI_ISL_538539, EPI_ISL_538540, EPI_ISL_538541, EPI_ISL_538542, EPI_ISL_538543, EPI_ISL_538544, EPI_ISL_538545, EPI_ISL_538546, EPI_ISL_538547, EPI_ISL_538548, EPI_ISL_538549, EPI_ISL_538550, EPI_ISL_538551, EPI_ISL_538552, EPI_ISL_538553, EPI_ISL_538554, EPI_ISL_538555, EPI_ISL_538556, EPI_ISL_538557, EPI_ISL_538558, EPI_ISL_538559, EPI_ISL_538560, EPI_ISL_538561, EPI_ISL_538562, EPI_ISL_538563, EPI_ISL_538564, EPI_ISL_538565, EPI_ISL_538566, EPI_ISL_538567, EPI_ISL_538568, EPI_ISL_538569, EPI_ISL_538570, EPI_ISL_538571, EPI_ISL_538572                                                                                                                                                                                                                                                                                                                                                                                                                                                                                                                                                                                                                                                                                                                                 | see above | NHLS-IALCH                                                                                                                                                                                                     | KRISP, KZN Research Innovation and Sequencing Platform                                                                                                                          | Giandhari J, Pillay S, Lessells R, Mdlalose K, York D, Khan S, Tegally H, Wilkinson E, de Oliveira T                                                                                                                                                               |
| EPI_ISL_538435, EPI_ISL_538436, EPI_ISL_538437, EPI_ISL_538438, EPI_ISL_538439, EPI_ISL_538440, EPI_ISL_538441, EPI_ISL_538442, EPI_ISL_538443, EPI_ISL_538444, EPI_ISL_538445, EPI_ISL_538446, EPI_ISL_538447, EPI_ISL_538448, EPI_ISL_538449, EPI_ISL_538450, EPI_ISL_538451, EPI_ISL_538452, EPI_ISL_538453, EPI_ISL_538454, EPI_ISL_538455, EPI_ISL_538456, EPI_ISL_538457, EPI_ISL_538458, EPI_ISL_538459, EPI_ISL_538460, EPI_ISL_538461, EPI_ISL_538462, EPI_ISL_538463, EPI_ISL_538464, EPI_ISL_538465, EPI_ISL_538466, EPI_ISL_538467, EPI_ISL_538468, EPI_ISL_538469, EPI_ISL_538470, EPI_ISL_538471, EPI_ISL_538472, EPI_ISL_538473, EPI_ISL_538474, EPI_ISL_538475, EPI_ISL_538476, EPI_ISL_538477, EPI_ISL_538478, EPI_ISL_538479, EPI_ISL_538480, EPI_ISL_538481, EPI_ISL_538482, EPI_ISL_538483, EPI_ISL_538484, EPI_ISL_538485, EPI_ISL_538486, EPI_ISL_538487, EPI_ISL_538488, EPI_ISL_538489, EPI_ISL_538490, EPI_ISL_538491, EPI_ISL_538492, EPI_ISL_538493, EPI_ISL_538494, EPI_ISL_538495, EPI_ISL_538496, EPI_ISL_538497, EPI_ISL_538498, EPI_ISL_538499, EPI_ISL_538500, EPI_ISL_538501, EPI_ISL_538502, EPI_ISL_538503, EPI_ISL_538504, EPI_ISL_538505, EPI_ISL_538506, EPI_ISL_538507, EPI_ISL_538508, EPI_ISL_538509, EPI_ISL_538510, EPI_ISL_538511, EPI_ISL_538512, EPI_ISL_538513, EPI_ISL_538514, EPI_ISL_538515, EPI_ISL_538516, EPI_ISL_538517, EPI_ISL_538518, EPI_ISL_538519, EPI_ISL_538520, EPI_ISL_538521, EPI_ISL_538522, EPI_ISL_538523, EPI_ISL_538524, EPI_ISL_538525, EPI_ISL_538526, EPI_ISL_538527, EPI_ISL_538528, EPI_ISL_538529, EPI_ISL_538530, EPI_ISL_538531, EPI_ISL_538532, EPI_ISL_538533, EPI_ISL_538534, EPI_ISL_538535, EPI_ISL_538536, EPI_ISL_538537, EPI_ISL_538538, EPI_ISL_538539, EPI_ISL_538540, EPI_ISL_538541, EPI_ISL_538542, EPI_ISL_538543, EPI_ISL_538544, EPI_ISL_538545, EPI_ISL_538546, EPI_ISL_538547, EPI_ISL_538548, EPI_ISL_538549, EPI_ISL_538550, EPI_ISL_538551, EPI_ISL_538552, EPI_ISL_538553, EPI_ISL_538554, EPI_ISL_538555, EPI_ISL_538556, EPI_ISL_538557, EPI_ISL_538558, EPI_ISL_538559, EPI_ISL_538560, EPI_ISL_538561, EPI_ISL_538562, EPI_ISL_538563, EPI_ISL_538564, EPI_ISL_538565, EPI_ISL_538566, EPI_ISL_538567, EPI_ISL_538568, EPI_ISL_538569, EPI_ISL_538570, EPI_ISL_538571, EPI_ISL_538                                                                                                                                                                                                                                                                                                                                                                                                                                                                                                                                                                                                                                                                                                                                    |           |                                                                                                                                                                                                                |                                                                                                                                                                                 |                                                                                                                                                                                                                                                                    |

|                                                                                                                                                                                                                                                                                                                                                                                |           |                                                                                             |                                                                          |                                                                                                                                                                                                           |
|--------------------------------------------------------------------------------------------------------------------------------------------------------------------------------------------------------------------------------------------------------------------------------------------------------------------------------------------------------------------------------|-----------|---------------------------------------------------------------------------------------------|--------------------------------------------------------------------------|-----------------------------------------------------------------------------------------------------------------------------------------------------------------------------------------------------------|
| EPI_ISL_538483, EPI_ISL_538484, EPI_ISL_538485, EPI_ISL_538486, EPI_ISL_538487, EPI_ISL_538488, EPI_ISL_538489, EPI_ISL_538490, EPI_ISL_538491, EPI_ISL_538492, EPI_ISL_538493, EPI_ISL_538494, EPI_ISL_538495, EPI_ISL_538496, EPI_ISL_538497                                                                                                                                 | see above | Department of Laboratory Medicine, Tan Tock Seng Hospital                                   | Department of Laboratory Medicine, Tan Tock Seng Hospital                | Chen YYC, Zair X, Lim JX, Li C, Tang WY, Maurer-Stroh S, Barkham TMS, Nagarajan N, Sessions OM                                                                                                            |
| EPI_ISL_538552                                                                                                                                                                                                                                                                                                                                                                 |           | Hospital Universitari Germans Trias i Pujol(HUGTIP)/Fundació Lluita contra la SIDA (FLSIDa) | IrsiCaixa AIDS Research Lab                                              | Marc Noguera-Julian, Mariona Parera, Maria Pilar Armengol, Marta Massanella, Ester Ballana, Lidia Ruiz, Nuria Izquierdo, Jorge Carrillo, Roger Paredes, Julia Blanco, Joaquim Segalés, Bonaventura Clotet |
| EPI_ISL_539493, EPI_ISL_539494                                                                                                                                                                                                                                                                                                                                                 |           | The National Institute of Public Health                                                     | State Veterinary Institute Prague                                        | Nagy,Ajirincova,H,Novakova,L,Trnka,D,Vecerova,J                                                                                                                                                           |
| EPI_ISL_539495                                                                                                                                                                                                                                                                                                                                                                 |           | Centers for Disease Control and Prevention, Dengue Branch                                   | Centers for Disease Control and Prevention, Dengue Branch                | Gilberto A. Santiago, Glenda Gonzalez, Betzabel Flores, Keyla Charriez, Jorge L. Munoz-Jordan, Gabriela Paz-Bailey, Janice Perez, Vanessa Rivera-Amill, Diego Sainz de la Peña, Jorge Bertran             |
| EPI_ISL_539496                                                                                                                                                                                                                                                                                                                                                                 |           | Hospital Nostra Senyora de Meritxell                                                        | Instituto de Salud Carlos III                                            | Iglesias-Caballero, M. Molinero Calamita, M. González-Esguevillas, M. Camarero, S. Pozo, F. Casas, I. Jiménez, P. Jiménez, M. Zaballos, A. Monzón, S. Varona, S. Juliá, M. Cuesta, I, F. Fernández        |
| EPI_ISL_539497                                                                                                                                                                                                                                                                                                                                                                 |           | Hospital Virgen de las Nieves                                                               | Instituto de Salud Carlos III                                            | Iglesias-Caballero, M. Molinero Calamita, M. González-Esguevillas, M. Camarero, S. Pozo, F. Casas, I. Jiménez, P. Jiménez, M. Zaballos, A. Monzón, S. Varona, S. Juliá, M. Cuesta, I, J. Lepe             |
| EPI_ISL_539500, EPI_ISL_539501, EPI_ISL_539502                                                                                                                                                                                                                                                                                                                                 |           | Hospital Clínico Universitario Lozano Blesa                                                 | Instituto de Salud Carlos III                                            | Iglesias-Caballero, M. Molinero Calamita, M. González-Esguevillas, M. Camarero, S. Pozo, F. Casas, I. Jiménez, P. Jiménez, M. Zaballos, A. Monzón, S. Varona, S. Juliá, M. Cuesta, I, R. Benito           |
| EPI_ISL_539503                                                                                                                                                                                                                                                                                                                                                                 |           | Hospital Universitario Miguel Servet                                                        | Instituto de Salud Carlos III                                            | Iglesias-Caballero, M. Molinero Calamita, M. González-Esguevillas, M. Camarero, S. Pozo, F. Casas, I. Jiménez, P. Jiménez, M. Zaballos, A. Monzón, S. Varona, S. Juliá, M. Cuesta, I, A. Rezusta          |
| EPI_ISL_539504                                                                                                                                                                                                                                                                                                                                                                 |           | Hospital Universitario Miguel Servet                                                        | Instituto de Salud Carlos III                                            | Iglesias-Caballero, M. Molinero Calamita, M. González-Esguevillas, M. Camarero, S. Pozo, F. Casas, I. Jiménez, P. Jiménez, M. Zaballos, A. Monzón, S. Varona, S. Juliá, M. Cuesta, I, R. Benito           |
| EPI_ISL_539505, EPI_ISL_539506, EPI_ISL_539507, EPI_ISL_539508                                                                                                                                                                                                                                                                                                                 |           | Hospital Universitario Miguel Servet                                                        | Instituto de Salud Carlos III                                            | Iglesias-Caballero, M. Molinero Calamita, M. González-Esguevillas, M. Camarero, S. Pozo, F. Casas, I. Jiménez, P. Jiménez, M. Zaballos, A. Monzón, S. Varona, S. Juliá, M. Cuesta, I, A. Rezusta          |
| EPI_ISL_539509, EPI_ISL_539510, EPI_ISL_539511, EPI_ISL_539512                                                                                                                                                                                                                                                                                                                 |           | Hospital Clínico Universitario Lozano Blesa                                                 | Instituto de Salud Carlos III                                            | Iglesias-Caballero, M. Molinero Calamita, M. González-Esguevillas, M. Camarero, S. Pozo, F. Casas, I. Jiménez, P. Jiménez, M. Zaballos, A. Monzón, S. Varona, S. Juliá, M. Cuesta, I, R. Benito           |
| EPI_ISL_539513, EPI_ISL_539514, EPI_ISL_539515, EPI_ISL_539516, EPI_ISL_539517, EPI_ISL_539518, EPI_ISL_539519                                                                                                                                                                                                                                                                 |           | Hospital Universitario Miguel Servet                                                        | Instituto de Salud Carlos III                                            | Iglesias-Caballero, M. Molinero Calamita, M. González-Esguevillas, M. Camarero, S. Pozo, F. Casas, I. Jiménez, P. Jiménez, M. Zaballos, A. Monzón, S. Varona, S. Juliá, M. Cuesta, I, A. Rezusta          |
| EPI_ISL_539520, EPI_ISL_539521                                                                                                                                                                                                                                                                                                                                                 |           | Hospital Universitario de Ceuta                                                             | Instituto de Salud Carlos III                                            | Iglesias-Caballero, M. Molinero Calamita, M. González-Esguevillas, M. Camarero, S. Pozo, F. Casas, I. Jiménez, P. Jiménez, M. Zaballos, A. Monzón, S. Varona, S. Juliá, M. Cuesta, I, J. López            |
| EPI_ISL_539522                                                                                                                                                                                                                                                                                                                                                                 |           | Hospital Universitario de Ceuta                                                             | Instituto de Salud Carlos III                                            | Iglesias-Caballero, M. Molinero Calamita, M. González-Esguevillas, M. Camarero, S. Pozo, F. Casas, I. Jiménez, P. Jiménez, M. Zaballos, A. Monzón, S. Varona, S. Juliá, M. Cuesta, I, G. Sánchez          |
| EPI_ISL_539523                                                                                                                                                                                                                                                                                                                                                                 |           | Hospital General de Segovia                                                                 | Instituto de Salud Carlos III                                            | Iglesias-Caballero, M. Molinero Calamita, M. González-Esguevillas, M. Camarero, S. Pozo, F. Casas, I. Jiménez, P. Jiménez, M. Zaballos, A. Monzón, S. Varona, S. Juliá, M. Cuesta, I, S. Hernando         |
| EPI_ISL_539524                                                                                                                                                                                                                                                                                                                                                                 |           | Gerencia de Asistencia Sanitaria de Soria                                                   | Instituto de Salud Carlos III                                            | Iglesias-Caballero, M. Molinero Calamita, M. González-Esguevillas, M. Camarero, S. Pozo, F. Casas, I. Jiménez, P. Jiménez, M. Zaballos, A. Monzón, S. Varona, S. Juliá, M. Cuesta, I, C. Aldea            |
| EPI_ISL_539525                                                                                                                                                                                                                                                                                                                                                                 |           | Hospital Nuestra Señora de Sonsoles                                                         | Instituto de Salud Carlos III                                            | Iglesias-Caballero, M. Molinero Calamita, M. González-Esguevillas, M. Camarero, S. Pozo, F. Casas, I. Jiménez, P. Jiménez, M. Zaballos, A. Monzón, S. Varona, S. Juliá, M. Cuesta, I, A. San Pedro        |
| EPI_ISL_539526, EPI_ISL_539527, EPI_ISL_539528, EPI_ISL_539529, EPI_ISL_539530                                                                                                                                                                                                                                                                                                 |           | Consejería de Sanidad y Asuntos Sociales                                                    | Instituto de Salud Carlos III                                            | Iglesias-Caballero, M. Molinero Calamita, M. González-Esguevillas, M. Camarero, S. Pozo, F. Casas, I. Jiménez, P. Jiménez, M. Zaballos, A. Monzón, S. Varona, S. Juliá, M. Cuesta, I, G. Gutiérrez        |
| EPI_ISL_539531                                                                                                                                                                                                                                                                                                                                                                 |           | C.H.U Nuestra Señora de Candelaria                                                          | Instituto de Salud Carlos III                                            | Iglesias-Caballero, M. Molinero Calamita, M. González-Esguevillas, M. Camarero, S. Pozo, F. Casas, I. Jiménez, P. Jiménez, M. Zaballos, A. Monzón, S. Varona, S. Juliá, M. Cuesta, I, O. Diez             |
| EPI_ISL_539532                                                                                                                                                                                                                                                                                                                                                                 |           | Hospital Universitario de Canarias                                                          | Instituto de Salud Carlos III                                            | Iglesias-Caballero, M. Molinero Calamita, M. González-Esguevillas, M. Camarero, S. Pozo, F. Casas, I. Jiménez, P. Jiménez, M. Zaballos, A. Monzón, S. Varona, S. Juliá, M. Cuesta, I, B. Castro           |
| EPI_ISL_539534, EPI_ISL_539535, EPI_ISL_539536, EPI_ISL_539537, EPI_ISL_539538, EPI_ISL_539539, EPI_ISL_539540, EPI_ISL_539541, EPI_ISL_539542, EPI_ISL_539543, EPI_ISL_539544, EPI_ISL_539545, EPI_ISL_539546, EPI_ISL_539547, EPI_ISL_539548, EPI_ISL_539549, EPI_ISL_539550, EPI_ISL_539551, EPI_ISL_539552, EPI_ISL_539553, EPI_ISL_539554, EPI_ISL_539555, EPI_ISL_539556 | see above | Hospital Clínic                                                                             | Instituto de Salud Carlos III                                            | Iglesias-Caballero, M. Molinero Calamita, M. González-Esguevillas, M. Camarero, S. Pozo, F. Casas, I. Jiménez, P. Jiménez, M. Zaballos, A. Monzón, S. Varona, S. Juliá, M. Cuesta, I, M.A Marcos          |
| EPI_ISL_539557                                                                                                                                                                                                                                                                                                                                                                 |           | Gerencia del área de salud de Badajoz, Llerena y Zafra                                      | Instituto de Salud Carlos III                                            | Iglesias-Caballero, M. Molinero Calamita, M. González-Esguevillas, M. Camarero, S. Pozo, F. Casas, I. Jiménez, P. Jiménez, M. Zaballos, A. Monzón, S. Varona, S. Juliá, M. Cuesta, I, C. Pazos            |
| EPI_ISL_539558                                                                                                                                                                                                                                                                                                                                                                 |           | Hospital San Pedro de Alcántara                                                             | Instituto de Salud Carlos III                                            | Iglesias-Caballero, M. Molinero Calamita, M. González-Esguevillas, M. Camarero, S. Pozo, F. Casas, I. Jiménez, P. Jiménez, M. Zaballos, A. Monzón, S. Varona, S. Juliá, M. Cuesta, I, E. Cerro            |
| EPI_ISL_539559                                                                                                                                                                                                                                                                                                                                                                 |           | Hospital Campo Arañuelo                                                                     | Instituto de Salud Carlos III                                            | Iglesias-Caballero, M. Molinero Calamita, M. González-Esguevillas, M. Camarero, S. Pozo, F. Casas, I. Jiménez, P. Jiménez, M. Zaballos, A. Monzón, S. Varona, S. Juliá, M. Cuesta, I, J. López            |
| EPI_ISL_539560                                                                                                                                                                                                                                                                                                                                                                 |           | Hospital Campo Arañuelo                                                                     | Instituto de Salud Carlos III                                            | Iglesias-Caballero, M. Molinero Calamita, M. González-Esguevillas, M. Camarero, S. Pozo, F. Casas, I. Jiménez, P. Jiménez, M. Zaballos, A. Monzón, S. Varona, S. Juliá, M. Cuesta, I, G. Rodríguez        |
| EPI_ISL_539561                                                                                                                                                                                                                                                                                                                                                                 |           | Hospital San Pedro de Alcántara                                                             | Instituto de Salud Carlos III                                            | Iglesias-Caballero, M. Molinero Calamita, M. González-Esguevillas, M. Camarero, S. Pozo, F. Casas, I. Jiménez, P. Jiménez, M. Zaballos, A. Monzón, S. Varona, S. Juliá, M. Cuesta, I, J. López            |
| EPI_ISL_539562                                                                                                                                                                                                                                                                                                                                                                 |           | Hospital San Pedro de Alcántara                                                             | Instituto de Salud Carlos III                                            | Iglesias-Caballero, M. Molinero Calamita, M. González-Esguevillas, M. Camarero, S. Pozo, F. Casas, I. Jiménez, P. Jiménez, M. Zaballos, A. Monzón, S. Varona, S. Juliá, M. Cuesta, I, M.A Cañizares       |
| EPI_ISL_539567                                                                                                                                                                                                                                                                                                                                                                 |           | Hospital Comarcal de Melilla                                                                | Instituto de Salud Carlos III                                            | Iglesias-Caballero, M. Molinero Calamita, M. González-Esguevillas, M. Camarero, S. Pozo, F. Casas, I. Jiménez, P. Jiménez, M. Zaballos, A. Monzón, S. Varona, S. Juliá, M. Cuesta, I, J. López            |
| EPI_ISL_539568                                                                                                                                                                                                                                                                                                                                                                 |           | Hospital Comarcal de Melilla                                                                | Instituto de Salud Carlos III                                            | Iglesias-Caballero, M. Molinero Calamita, M. González-Esguevillas, M. Camarero, S. Pozo, F. Casas, I. Jiménez, P. Jiménez, M. Zaballos, A. Monzón, S. Varona, S. Juliá, M. Cuesta, I, C. Ezepeleta        |
| EPI_ISL_539569, EPI_ISL_539570, EPI_ISL_539571, EPI_ISL_539572                                                                                                                                                                                                                                                                                                                 |           | Complejo Hospitalario de Navarra                                                            | Instituto de Salud Carlos III                                            | Iglesias-Caballero, M. Molinero Calamita, M. González-Esguevillas, M. Camarero, S. Pozo, F. Casas, I. Jiménez, P. Jiménez, M. Zaballos, A. Monzón, S. Varona, S. Juliá, M. Cuesta, I, J. López            |
| EPI_ISL_539776                                                                                                                                                                                                                                                                                                                                                                 |           | National Institute of Public Health (Czech Republic)                                        | State Veterinary Institute Prague                                        | Nagy, A; Jirincova, H; Novakova, L; Trnka, D; Vecerova, J,                                                                                                                                                |
| EPI_ISL_539777                                                                                                                                                                                                                                                                                                                                                                 |           | The National Institute of Public Health                                                     | State Veterinary Institute Prague                                        | Nagy,Ajirincova,H,Novakova,L,Trnka,D,Vecerova,J                                                                                                                                                           |
| EPI_ISL_539778, EPI_ISL_539779, EPI_ISL_539780, EPI_ISL_539781, EPI_ISL_539782                                                                                                                                                                                                                                                                                                 |           | National Institute of Public Health (Czech Republic)                                        | State Veterinary Institute Prague                                        | Nagy, A; Jirincova, H; Novakova, L; Trnka, D; Vecerova, J,                                                                                                                                                |
| EPI_ISL_539803                                                                                                                                                                                                                                                                                                                                                                 |           | Queen Mary Hospital                                                                         | Hong Kong Department of Health                                           | Alan K.L. Tsang, Peter C.W. Yip, Edman T.K. Lam, Rickjason C.W. Chan, Dominic N.C. Tsang                                                                                                                  |
| EPI_ISL_539804                                                                                                                                                                                                                                                                                                                                                                 |           | Yan Choi Hospital                                                                           | Hong Kong Department of Health                                           | Alan K.L. Tsang, Peter C.W. Yip, Edman T.K. Lam, Rickjason C.W. Chan, Dominic N.C. Tsang                                                                                                                  |
| EPI_ISL_539805                                                                                                                                                                                                                                                                                                                                                                 |           | Kwong Wah Hospital                                                                          | Hong Kong Department of Health                                           | Alan K.L. Tsang, Peter C.W. Yip, Edman T.K. Lam, Rickjason C.W. Chan, Dominic N.C. Tsang                                                                                                                  |
| EPI_ISL_539806, EPI_ISL_539807, EPI_ISL_539808                                                                                                                                                                                                                                                                                                                                 |           | Princess Margaret Hospital                                                                  | Hong Kong Department of Health                                           | Alan K.L. Tsang, Peter C.W. Yip, Edman T.K. Lam, Rickjason C.W. Chan, Dominic N.C. Tsang                                                                                                                  |
| EPI_ISL_539809, EPI_ISL_539811, EPI_ISL_539812                                                                                                                                                                                                                                                                                                                                 |           | Asiaworld Expo Command Post                                                                 | Hong Kong Department of Health                                           | Alan K.L. Tsang, Peter C.W. Yip, Edman T.K. Lam, Rickjason C.W. Chan, Dominic N.C. Tsang                                                                                                                  |
| EPI_ISL_539813                                                                                                                                                                                                                                                                                                                                                                 |           | Prince of Wales Hospital                                                                    | Hong Kong Department of Health                                           | Alan K.L. Tsang, Peter C.W. Yip, Edman T.K. Lam, Rickjason C.W. Chan, Dominic N.C. Tsang                                                                                                                  |
| EPI_ISL_539814                                                                                                                                                                                                                                                                                                                                                                 |           | Tuen Mun Hospital                                                                           | Hong Kong Department of Health                                           | Alan K.L. Tsang, Peter C.W. Yip, Edman T.K. Lam, Rickjason C.W. Chan, Dominic N.C. Tsang                                                                                                                  |
| EPI_ISL_539815                                                                                                                                                                                                                                                                                                                                                                 |           | Queen Elizabeth Hospital                                                                    | Hong Kong Department of Health                                           | Alan K.L. Tsang, Peter C.W. Yip, Edman T.K. Lam, Rickjason C.W. Chan, Dominic N.C. Tsang                                                                                                                  |
| EPI_ISL_539816, EPI_ISL_539817                                                                                                                                                                                                                                                                                                                                                 |           | Queen Mary Hospital                                                                         | Hong Kong Department of Health                                           | Alan K.L. Tsang, Peter C.W. Yip, Edman T.K. Lam, Rickjason C.W. Chan, Dominic N.C. Tsang                                                                                                                  |
| EPI_ISL_539818, EPI_ISL_539819                                                                                                                                                                                                                                                                                                                                                 |           | Tuen Mun Hospital                                                                           | Hong Kong Department of Health                                           | Alan K.L. Tsang, Peter C.W. Yip, Edman T.K. Lam, Rickjason C.W. Chan, Dominic N.C. Tsang                                                                                                                  |
| EPI_ISL_539820                                                                                                                                                                                                                                                                                                                                                                 |           | Queen Mary Hospital                                                                         | Hong Kong Department of Health                                           | Alan K.L. Tsang, Peter C.W. Yip, Edman T.K. Lam, Rickjason C.W. Chan, Dominic N.C. Tsang                                                                                                                  |
| EPI_ISL_539821                                                                                                                                                                                                                                                                                                                                                                 |           | Asiaworld Expo Command Post                                                                 | Hong Kong Department of Health                                           | Alan K.L. Tsang, Peter C.W. Yip, Edman T.K. Lam, Rickjason C.W. Chan, Dominic N.C. Tsang                                                                                                                  |
| EPI_ISL_539822, EPI_ISL_539823                                                                                                                                                                                                                                                                                                                                                 |           | Communicable Disease Branch                                                                 | Hong Kong Department of Health                                           | Alan K.L. Tsang, Peter C.W. Yip, Edman T.K. Lam, Rickjason C.W. Chan, Dominic N.C. Tsang                                                                                                                  |
| EPI_ISL_539850, EPI_ISL_539851                                                                                                                                                                                                                                                                                                                                                 |           | Pok Oi Hospital                                                                             | Hong Kong Department of Health                                           | Alan K.L. Tsang, Peter C.W. Yip, Edman T.K. Lam, Rickjason C.W. Chan, Dominic N.C. Tsang                                                                                                                  |
| EPI_ISL_540993, EPI_ISL_540994, EPI_ISL_540995, EPI_ISL_540996, EPI_ISL_540997, EPI_ISL_540998, EPI_ISL_540999, EPI_ISL_541000, EPI_ISL_541001, EPI_ISL_541002, EPI_ISL_541003, EPI_ISL_541004, EPI_ISL_541005, EPI_ISL_541006, EPI_ISL_541007                                                                                                                                 | see above | Health and Environmental Research Institute of Gwangju Metropolitan city                    | Health and Environmental Research Institute of Gwangju Metropolitan city | Min Ji Kim, Ji-eun Lee                                                                                                                                                                                    |
| EPI_ISL_541082                                                                                                                                                                                                                                                                                                                                                                 |           | The National Institute of Public Health                                                     | State Veterinary Institute Prague                                        | Nagy,Ajirincova,H,Novakova,L,Trnka,D,Vecerova,J                                                                                                                                                           |



|                                                                                                                                                                                                                                                                                                                                                                                                                                                                                                                                                                                                                                                                                                                                                                                                                                                                                                                                                                                                                                                                                                                                                                                                                                                                                                                                                                                                                                                                                                                                                                                                                                                                                                                                |                                                                                 |                                                                                                                                                                                                                                                                                                                                 |                                                                                                                                                                                                                                                                                                                                                                                                                                                                                                      |
|--------------------------------------------------------------------------------------------------------------------------------------------------------------------------------------------------------------------------------------------------------------------------------------------------------------------------------------------------------------------------------------------------------------------------------------------------------------------------------------------------------------------------------------------------------------------------------------------------------------------------------------------------------------------------------------------------------------------------------------------------------------------------------------------------------------------------------------------------------------------------------------------------------------------------------------------------------------------------------------------------------------------------------------------------------------------------------------------------------------------------------------------------------------------------------------------------------------------------------------------------------------------------------------------------------------------------------------------------------------------------------------------------------------------------------------------------------------------------------------------------------------------------------------------------------------------------------------------------------------------------------------------------------------------------------------------------------------------------------|---------------------------------------------------------------------------------|---------------------------------------------------------------------------------------------------------------------------------------------------------------------------------------------------------------------------------------------------------------------------------------------------------------------------------|------------------------------------------------------------------------------------------------------------------------------------------------------------------------------------------------------------------------------------------------------------------------------------------------------------------------------------------------------------------------------------------------------------------------------------------------------------------------------------------------------|
| EPI_ISL_541138, EPI_ISL_541332, EPI_ISL_541333, EPI_ISL_541334                                                                                                                                                                                                                                                                                                                                                                                                                                                                                                                                                                                                                                                                                                                                                                                                                                                                                                                                                                                                                                                                                                                                                                                                                                                                                                                                                                                                                                                                                                                                                                                                                                                                 | The National Institute of Public Health                                         | State Veterinary Institute Prague                                                                                                                                                                                                                                                                                               | Nagy A; Jirincova,H; Novakova,L; Trnka,D; Vecerova,J                                                                                                                                                                                                                                                                                                                                                                                                                                                 |
| EPI_ISL_541335                                                                                                                                                                                                                                                                                                                                                                                                                                                                                                                                                                                                                                                                                                                                                                                                                                                                                                                                                                                                                                                                                                                                                                                                                                                                                                                                                                                                                                                                                                                                                                                                                                                                                                                 | The National Institute of Public Health                                         | Sídlištní 136/24 165 03, Prague Czech Republic                                                                                                                                                                                                                                                                                  | Nagy A; Jirincova,H; Novakova,L; Trnka,D; Vecerova,J                                                                                                                                                                                                                                                                                                                                                                                                                                                 |
| EPI_ISL_541336                                                                                                                                                                                                                                                                                                                                                                                                                                                                                                                                                                                                                                                                                                                                                                                                                                                                                                                                                                                                                                                                                                                                                                                                                                                                                                                                                                                                                                                                                                                                                                                                                                                                                                                 | The National Institute of Public Health                                         | State Veterinary Institute Prague                                                                                                                                                                                                                                                                                               | Nagy A; Jirincova,H; Novakova,L; Trnka,D; Vecerova,J                                                                                                                                                                                                                                                                                                                                                                                                                                                 |
| EPI_ISL_541337                                                                                                                                                                                                                                                                                                                                                                                                                                                                                                                                                                                                                                                                                                                                                                                                                                                                                                                                                                                                                                                                                                                                                                                                                                                                                                                                                                                                                                                                                                                                                                                                                                                                                                                 | The National Institute of Public Health                                         | State Veterinary Institute Prague                                                                                                                                                                                                                                                                                               | Nagy A; Jirincova,H; Novakova,L; Trnka,D; Vecerova,J                                                                                                                                                                                                                                                                                                                                                                                                                                                 |
| EPI_ISL_541352                                                                                                                                                                                                                                                                                                                                                                                                                                                                                                                                                                                                                                                                                                                                                                                                                                                                                                                                                                                                                                                                                                                                                                                                                                                                                                                                                                                                                                                                                                                                                                                                                                                                                                                 | Laboratory of Respiratory Viruses and Measles, Oswaldo Cruz Institute, FIOCRUZ  | Laboratory of Respiratory Viruses and Measles, Oswaldo Cruz Institute, FIOCRUZ                                                                                                                                                                                                                                                  | Paola Resende, Luciana Appolinario, Fernando Motta, Anna Carolina Paixão, Ana Carolina Mendonça, Jonathan Lopes, Marilda Siqueira                                                                                                                                                                                                                                                                                                                                                                    |
| EPI_ISL_541372, EPI_ISL_541374, EPI_ISL_541375, EPI_ISL_541376, EPI_ISL_541379, EPI_ISL_541383, EPI_ISL_541385                                                                                                                                                                                                                                                                                                                                                                                                                                                                                                                                                                                                                                                                                                                                                                                                                                                                                                                                                                                                                                                                                                                                                                                                                                                                                                                                                                                                                                                                                                                                                                                                                 | LACEN/SE                                                                        | Laboratory of Respiratory Viruses and Measles, Oswaldo Cruz Institute, FIOCRUZ                                                                                                                                                                                                                                                  | Paola Resende, Luciana Appolinario, Fernando Motta, Anna Carolina Paixão, Ana Carolina Mendonça, Jonathan Lopes, Clioma Santos, Marilda Siqueira                                                                                                                                                                                                                                                                                                                                                     |
| EPI_ISL_541970                                                                                                                                                                                                                                                                                                                                                                                                                                                                                                                                                                                                                                                                                                                                                                                                                                                                                                                                                                                                                                                                                                                                                                                                                                                                                                                                                                                                                                                                                                                                                                                                                                                                                                                 | Influenza Centre, University of Bergen                                          | Norwegian Institute of Public Health, Department of Virology                                                                                                                                                                                                                                                                    | Fan Zhou, Rebecca J Cox, Karl A Brokstad, Bjørn Blomberg, Kathrine Stene-Johansen, Kamilla Heddeland Instefjord, Hilde Elshaug, Rasmus Riis Kopperud, Hilde Synneve Vollan, Karoline Bragstad, Olav Hungnes                                                                                                                                                                                                                                                                                          |
| EPI_ISL_542099, EPI_ISL_542101, EPI_ISL_542104, EPI_ISL_542106, EPI_ISL_542107, EPI_ISL_542108, EPI_ISL_542110, EPI_ISL_542112, EPI_ISL_542114, EPI_ISL_542116, EPI_ISL_542118, EPI_ISL_542119, EPI_ISL_542120, EPI_ISL_542122, EPI_ISL_542124, EPI_ISL_542128, EPI_ISL_542130, EPI_ISL_542131, EPI_ISL_542133, EPI_ISL_542145, EPI_ISL_542146, EPI_ISL_542152, EPI_ISL_542153, EPI_ISL_542154, EPI_ISL_542155, EPI_ISL_542156, EPI_ISL_542158, EPI_ISL_542159, EPI_ISL_542162, EPI_ISL_542165, EPI_ISL_542166, EPI_ISL_542169, EPI_ISL_542170, EPI_ISL_542172, EPI_ISL_542173, EPI_ISL_542174, EPI_ISL_542175, EPI_ISL_542178, EPI_ISL_542180, EPI_ISL_542183, EPI_ISL_542192, EPI_ISL_542193, EPI_ISL_542194, EPI_ISL_542195, EPI_ISL_542196, EPI_ISL_542197, EPI_ISL_542198, EPI_ISL_542199, EPI_ISL_542200, EPI_ISL_542201, EPI_ISL_542202, EPI_ISL_542203, EPI_ISL_542204, EPI_ISL_542205, EPI_ISL_542206, EPI_ISL_542207, EPI_ISL_542208, EPI_ISL_542209, EPI_ISL_542210, EPI_ISL_542211, EPI_ISL_542212, EPI_ISL_542213, EPI_ISL_542214, EPI_ISL_542215, EPI_ISL_542216, EPI_ISL_542217, EPI_ISL_542218, EPI_ISL_542219, EPI_ISL_542220, EPI_ISL_542221, EPI_ISL_542222, EPI_ISL_542223, EPI_ISL_542224, EPI_ISL_542225, EPI_ISL_542226, EPI_ISL_542228, EPI_ISL_542229, EPI_ISL_542230, EPI_ISL_542231, EPI_ISL_542232, EPI_ISL_542233, EPI_ISL_542234, EPI_ISL_542236, EPI_ISL_542237, EPI_ISL_542238, EPI_ISL_542239, EPI_ISL_542240, EPI_ISL_542242, EPI_ISL_542243, EPI_ISL_542244, EPI_ISL_542249, EPI_ISL_542250, EPI_ISL_542251, EPI_ISL_542252, EPI_ISL_542256, EPI_ISL_542260, EPI_ISL_542261, EPI_ISL_542262, EPI_ISL_542264, EPI_ISL_542274, EPI_ISL_542275, EPI_ISL_542276, EPI_ISL_542277                 | Dep. Of Oncology and Hemato-Oncology University of Milan                        | Claudia Alteri, Valeria Cento, Antonio Piralla, Valentino Costabile, Monica Tallarita, Luna Colagrossi, Silvia Renica, Federica Giardina, Federica Novazzi, Stefano Gaiarsa, Elisa Matarazzo, Maria Antonello, Chiara Vismara, Roberto Fumagalli, Oscar Massimiliano Epis, Massimo Puoti, Carlo Federico Perno, Fausto Baldanti |                                                                                                                                                                                                                                                                                                                                                                                                                                                                                                      |
| see above                                                                                                                                                                                                                                                                                                                                                                                                                                                                                                                                                                                                                                                                                                                                                                                                                                                                                                                                                                                                                                                                                                                                                                                                                                                                                                                                                                                                                                                                                                                                                                                                                                                                                                                      | ASST GOM Niguarda                                                               | Dep. Of Oncology and Hemato-Oncology University of Milan                                                                                                                                                                                                                                                                        | Claudia Alteri, Valeria Cento, Antonio Piralla, Valentino Costabile, Monica Tallarita, Luna Colagrossi, Silvia Renica, Federica Giardina, Federica Novazzi, Stefano Gaiarsa, Elisa Matarazzo, Maria Antonello, Chiara Vismara, Roberto Fumagalli, Oscar Massimiliano Epis, Massimo Puoti, Carlo Federico Perno, Fausto Baldanti                                                                                                                                                                      |
| EPI_ISL_542278, EPI_ISL_542279, EPI_ISL_542280, EPI_ISL_542281, EPI_ISL_542282, EPI_ISL_542283, EPI_ISL_542284, EPI_ISL_542285, EPI_ISL_542286, EPI_ISL_542287, EPI_ISL_542288, EPI_ISL_542289, EPI_ISL_542290, EPI_ISL_542291, EPI_ISL_542292, EPI_ISL_542294, EPI_ISL_542297, EPI_ISL_542299, EPI_ISL_542302, EPI_ISL_542304, EPI_ISL_542305, EPI_ISL_542306, EPI_ISL_542307, EPI_ISL_542308, EPI_ISL_542309, EPI_ISL_542310, EPI_ISL_542311, EPI_ISL_542312, EPI_ISL_542313, EPI_ISL_542314, EPI_ISL_542315, EPI_ISL_542316, EPI_ISL_542317, EPI_ISL_542318, EPI_ISL_542319, EPI_ISL_542320, EPI_ISL_542321, EPI_ISL_542322, EPI_ISL_542323, EPI_ISL_542324, EPI_ISL_542325, EPI_ISL_542326, EPI_ISL_542327, EPI_ISL_542328, EPI_ISL_542329, EPI_ISL_542330, EPI_ISL_542331, EPI_ISL_542332, EPI_ISL_542333, EPI_ISL_542334, EPI_ISL_542335, EPI_ISL_542336, EPI_ISL_542337, EPI_ISL_542338, EPI_ISL_542339, EPI_ISL_542340, EPI_ISL_542341, EPI_ISL_542342, EPI_ISL_542343, EPI_ISL_542344, EPI_ISL_542345, EPI_ISL_542346, EPI_ISL_542347, EPI_ISL_542348, EPI_ISL_542349, EPI_ISL_542350, EPI_ISL_542351, EPI_ISL_542352, EPI_ISL_542353, EPI_ISL_542354, EPI_ISL_542355, EPI_ISL_542357, EPI_ISL_542358, EPI_ISL_542359, EPI_ISL_542360, EPI_ISL_542361, EPI_ISL_542363, EPI_ISL_542364, EPI_ISL_542365, EPI_ISL_542366, EPI_ISL_542367, EPI_ISL_542369, EPI_ISL_542370, EPI_ISL_542371, EPI_ISL_542372, EPI_ISL_542373, EPI_ISL_542374, EPI_ISL_542375, EPI_ISL_542376, EPI_ISL_542377, EPI_ISL_542378, EPI_ISL_542379, EPI_ISL_542381, EPI_ISL_542382, EPI_ISL_542383, EPI_ISL_542384, EPI_ISL_542385, EPI_ISL_542386, EPI_ISL_542387, EPI_ISL_542388, EPI_ISL_542389, EPI_ISL_542390, EPI_ISL_542391, EPI_ISL_542392 | Dep. Of Oncology and Hemato-Oncology University of Milan                        | Claudia Alteri, Valeria Cento, Antonio Piralla, Valentino Costabile, Monica Tallarita, Luna Colagrossi, Silvia Renica, Federica Giardina, Federica Novazzi, Stefano Gaiarsa, Elisa Matarazzo, Maria Antonello, Chiara Vismara, Roberto Fumagalli, Oscar Massimiliano Epis, Massimo Puoti, Carlo Federico Perno, Fausto Baldanti |                                                                                                                                                                                                                                                                                                                                                                                                                                                                                                      |
| see above                                                                                                                                                                                                                                                                                                                                                                                                                                                                                                                                                                                                                                                                                                                                                                                                                                                                                                                                                                                                                                                                                                                                                                                                                                                                                                                                                                                                                                                                                                                                                                                                                                                                                                                      | San Matteo Hospital Pavia                                                       | Dep. Of Oncology and Hemato-Oncology University of Milan                                                                                                                                                                                                                                                                        | Claudia Alteri, Valeria Cento, Antonio Piralla, Valentino Costabile, Monica Tallarita, Luna Colagrossi, Silvia Renica, Federica Giardina, Federica Novazzi, Stefano Gaiarsa, Elisa Matarazzo, Maria Antonello, Chiara Vismara, Roberto Fumagalli, Oscar Massimiliano Epis, Massimo Puoti, Carlo Federico Perno, Fausto Baldanti                                                                                                                                                                      |
| EPI_ISL_542413, EPI_ISL_542415, EPI_ISL_542419, EPI_ISL_542420, EPI_ISL_542421, EPI_ISL_542422, EPI_ISL_542423, EPI_ISL_542424, EPI_ISL_542425, EPI_ISL_542426, EPI_ISL_542427, EPI_ISL_542428, EPI_ISL_542429, EPI_ISL_542431, EPI_ISL_542432, EPI_ISL_542433, EPI_ISL_542434, EPI_ISL_542435, EPI_ISL_542436, EPI_ISL_542437, EPI_ISL_542438, EPI_ISL_542439, EPI_ISL_542440, EPI_ISL_542442, EPI_ISL_542443                                                                                                                                                                                                                                                                                                                                                                                                                                                                                                                                                                                                                                                                                                                                                                                                                                                                                                                                                                                                                                                                                                                                                                                                                                                                                                                 | see above                                                                       | ASST GOM Niguarda                                                                                                                                                                                                                                                                                                               | Dep. Of Oncology and Hemato-Oncology University of Milan                                                                                                                                                                                                                                                                                                                                                                                                                                             |
| EPI_ISL_545580, EPI_ISL_545954, EPI_ISL_545956                                                                                                                                                                                                                                                                                                                                                                                                                                                                                                                                                                                                                                                                                                                                                                                                                                                                                                                                                                                                                                                                                                                                                                                                                                                                                                                                                                                                                                                                                                                                                                                                                                                                                 | The National Institute of Public Health                                         | State Veterinary Institute Prague                                                                                                                                                                                                                                                                                               | Nagy,A;Jirincova,H;Novakova,L;Trnka,D;Vecerova,J                                                                                                                                                                                                                                                                                                                                                                                                                                                     |
| EPI_ISL_545957, EPI_ISL_546436, EPI_ISL_546935, EPI_ISL_546936                                                                                                                                                                                                                                                                                                                                                                                                                                                                                                                                                                                                                                                                                                                                                                                                                                                                                                                                                                                                                                                                                                                                                                                                                                                                                                                                                                                                                                                                                                                                                                                                                                                                 | The National Institute of Public Health                                         | State Veterinary Institute Prague                                                                                                                                                                                                                                                                                               | Nagy A; Jirincova,H; Novakova,L; Trnka,D; Vecerova,J                                                                                                                                                                                                                                                                                                                                                                                                                                                 |
| EPI_ISL_547570                                                                                                                                                                                                                                                                                                                                                                                                                                                                                                                                                                                                                                                                                                                                                                                                                                                                                                                                                                                                                                                                                                                                                                                                                                                                                                                                                                                                                                                                                                                                                                                                                                                                                                                 | PS Municipal Dr Augusto Gomes de Mattos                                         | Instituto Adolfo Lutz, Interdisciplinary Procedures Center, Strategic Laboratory                                                                                                                                                                                                                                                | Claudio Tavares Sacchi, Claudia Regina Gonçalves, Erica Valessa Ramos Gomes, Karoline Rodrigues Campos                                                                                                                                                                                                                                                                                                                                                                                               |
| EPI_ISL_547571                                                                                                                                                                                                                                                                                                                                                                                                                                                                                                                                                                                                                                                                                                                                                                                                                                                                                                                                                                                                                                                                                                                                                                                                                                                                                                                                                                                                                                                                                                                                                                                                                                                                                                                 | Hospital Municipal Antônio Giglio                                               | Instituto Adolfo Lutz, Interdisciplinary Procedures Center, Strategic Laboratory                                                                                                                                                                                                                                                | Claudio Tavares Sacchi, Claudia Regina Gonçalves, Erica Valessa Ramos Gomes, Karoline Rodrigues Campos                                                                                                                                                                                                                                                                                                                                                                                               |
| EPI_ISL_547573                                                                                                                                                                                                                                                                                                                                                                                                                                                                                                                                                                                                                                                                                                                                                                                                                                                                                                                                                                                                                                                                                                                                                                                                                                                                                                                                                                                                                                                                                                                                                                                                                                                                                                                 | Vigilância em Saúde de Cajamar                                                  | Instituto Adolfo Lutz, Interdisciplinary Procedures Center, Strategic Laboratory                                                                                                                                                                                                                                                | Claudio Tavares Sacchi, Claudia Regina Gonçalves, Erica Valessa Ramos Gomes, Karoline Rodrigues Campos                                                                                                                                                                                                                                                                                                                                                                                               |
| EPI_ISL_547574                                                                                                                                                                                                                                                                                                                                                                                                                                                                                                                                                                                                                                                                                                                                                                                                                                                                                                                                                                                                                                                                                                                                                                                                                                                                                                                                                                                                                                                                                                                                                                                                                                                                                                                 | Hospital Universitario da USP                                                   | Instituto Adolfo Lutz, Interdisciplinary Procedures Center, Strategic Laboratory                                                                                                                                                                                                                                                | Claudio Tavares Sacchi, Claudia Regina Gonçalves, Erica Valessa Ramos Gomes, Karoline Rodrigues Campos                                                                                                                                                                                                                                                                                                                                                                                               |
| EPI_ISL_547575                                                                                                                                                                                                                                                                                                                                                                                                                                                                                                                                                                                                                                                                                                                                                                                                                                                                                                                                                                                                                                                                                                                                                                                                                                                                                                                                                                                                                                                                                                                                                                                                                                                                                                                 | SVO Jundiáí                                                                     | Instituto Adolfo Lutz, Interdisciplinary Procedures Center, Strategic Laboratory                                                                                                                                                                                                                                                | Claudio Tavares Sacchi, Claudia Regina Gonçalves, Erica Valessa Ramos Gomes, Karoline Rodrigues Campos                                                                                                                                                                                                                                                                                                                                                                                               |
| EPI_ISL_547576                                                                                                                                                                                                                                                                                                                                                                                                                                                                                                                                                                                                                                                                                                                                                                                                                                                                                                                                                                                                                                                                                                                                                                                                                                                                                                                                                                                                                                                                                                                                                                                                                                                                                                                 | Secretaria Municipal de Saúde                                                   | Instituto Adolfo Lutz, Interdisciplinary Procedures Center, Strategic Laboratory                                                                                                                                                                                                                                                | Claudio Tavares Sacchi, Claudia Regina Gonçalves, Erica Valessa Ramos Gomes, Karoline Rodrigues Campos                                                                                                                                                                                                                                                                                                                                                                                               |
| EPI_ISL_547577                                                                                                                                                                                                                                                                                                                                                                                                                                                                                                                                                                                                                                                                                                                                                                                                                                                                                                                                                                                                                                                                                                                                                                                                                                                                                                                                                                                                                                                                                                                                                                                                                                                                                                                 | Hospital e Maternidade Nossa Senhora das Graças                                 | Instituto Adolfo Lutz, Interdisciplinary Procedures Center, Strategic Laboratory                                                                                                                                                                                                                                                | Claudio Tavares Sacchi, Claudia Regina Gonçalves, Erica Valessa Ramos Gomes, Karoline Rodrigues Campos                                                                                                                                                                                                                                                                                                                                                                                               |
| EPI_ISL_547578                                                                                                                                                                                                                                                                                                                                                                                                                                                                                                                                                                                                                                                                                                                                                                                                                                                                                                                                                                                                                                                                                                                                                                                                                                                                                                                                                                                                                                                                                                                                                                                                                                                                                                                 | Hospital Doutor Domingos Leonardo Ceravolo                                      | Instituto Adolfo Lutz, Interdisciplinary Procedures Center, Strategic Laboratory                                                                                                                                                                                                                                                | Claudio Tavares Sacchi, Claudia Regina Gonçalves, Erica Valessa Ramos Gomes, Karoline Rodrigues Campos                                                                                                                                                                                                                                                                                                                                                                                               |
| EPI_ISL_547579                                                                                                                                                                                                                                                                                                                                                                                                                                                                                                                                                                                                                                                                                                                                                                                                                                                                                                                                                                                                                                                                                                                                                                                                                                                                                                                                                                                                                                                                                                                                                                                                                                                                                                                 | Santa Casa de Misericórdia de Araçatuba                                         | Instituto Adolfo Lutz, Interdisciplinary Procedures Center, Strategic Laboratory                                                                                                                                                                                                                                                | Claudio Tavares Sacchi, Claudia Regina Gonçalves, Erica Valessa Ramos Gomes, Karoline Rodrigues Campos                                                                                                                                                                                                                                                                                                                                                                                               |
| EPI_ISL_547580                                                                                                                                                                                                                                                                                                                                                                                                                                                                                                                                                                                                                                                                                                                                                                                                                                                                                                                                                                                                                                                                                                                                                                                                                                                                                                                                                                                                                                                                                                                                                                                                                                                                                                                 | Santa Casa da Misericórdia de Presidente Prudente                               | Instituto Adolfo Lutz, Interdisciplinary Procedures Center, Strategic Laboratory                                                                                                                                                                                                                                                | Claudio Tavares Sacchi, Claudia Regina Gonçalves, Erica Valessa Ramos Gomes, Karoline Rodrigues Campos                                                                                                                                                                                                                                                                                                                                                                                               |
| EPI_ISL_547966, EPI_ISL_547967, EPI_ISL_547968                                                                                                                                                                                                                                                                                                                                                                                                                                                                                                                                                                                                                                                                                                                                                                                                                                                                                                                                                                                                                                                                                                                                                                                                                                                                                                                                                                                                                                                                                                                                                                                                                                                                                 | The National Institute of Public Health                                         | State Veterinary Institute Prague                                                                                                                                                                                                                                                                                               | Nagy,A;Jirincova,H;Novakova,L;Trnka,D;Vecerova,J                                                                                                                                                                                                                                                                                                                                                                                                                                                     |
| EPI_ISL_548208, EPI_ISL_548214                                                                                                                                                                                                                                                                                                                                                                                                                                                                                                                                                                                                                                                                                                                                                                                                                                                                                                                                                                                                                                                                                                                                                                                                                                                                                                                                                                                                                                                                                                                                                                                                                                                                                                 | Laboratoire de Virologie, HUG                                                   | Swiss National Reference Centre for Influenza                                                                                                                                                                                                                                                                                   | LAUBSCHER F.                                                                                                                                                                                                                                                                                                                                                                                                                                                                                         |
| EPI_ISL_548243, EPI_ISL_548244                                                                                                                                                                                                                                                                                                                                                                                                                                                                                                                                                                                                                                                                                                                                                                                                                                                                                                                                                                                                                                                                                                                                                                                                                                                                                                                                                                                                                                                                                                                                                                                                                                                                                                 | Faith Laboratory, Immunology Institute, Icahn School of Medicine at Mount Sinai | van Bakel Laboratory, Genetics and Genomics Sciences, Icahn School of Medicine at Mount Sinai                                                                                                                                                                                                                                   | Graham J. Britton, Alice Chen-Liaw, Francesca Cossarini, Alexandra Livanos, Matthew P. Spindler, Tamar Plitt, Joseph Eggers, Ilaria Mogno, Ana S. Gonzalez-Reiche, Sophia Sui, Michael Tankelevich, Lauren Tal Grinspan, Rebekah E. Dixon, Divya Jha, Gustavo Martinez-Delgado, Fatima Amanat, Daisy Hoagland, Jeremiah R. tenOver, Maria R. Dubinsky, Miriam Merad, Harm Van Bakel, Florian Krammer, Gerold Bongers, Saurabh Mehandru and Benjamin J. Faith                                         |
| EPI_ISL_548966, EPI_ISL_548967, EPI_ISL_548968, EPI_ISL_548970, EPI_ISL_548971                                                                                                                                                                                                                                                                                                                                                                                                                                                                                                                                                                                                                                                                                                                                                                                                                                                                                                                                                                                                                                                                                                                                                                                                                                                                                                                                                                                                                                                                                                                                                                                                                                                 | Expo2020 Emergency Center                                                       | Agiomix                                                                                                                                                                                                                                                                                                                         | Walaa Allam, Cherif Ben Hamada, Cengiz Yakicier, Walid Dirid, Rashid Mohammed, Tamer Degheidy                                                                                                                                                                                                                                                                                                                                                                                                        |
| EPI_ISL_560407                                                                                                                                                                                                                                                                                                                                                                                                                                                                                                                                                                                                                                                                                                                                                                                                                                                                                                                                                                                                                                                                                                                                                                                                                                                                                                                                                                                                                                                                                                                                                                                                                                                                                                                 | Istituto Zooprofilattico Sperimentale del Mezzogiorno                           | INMI Lazzaro Spallanzani IRCCS                                                                                                                                                                                                                                                                                                  | Barbara Bartolini, Cesare E.M. Gruber, Martina Rueca, Francesco Messina, Antonio Di Caro, Giovanna Fusco, Maurizio Viscardi, Giorgio Borriello, Sergio Brandi, Maria R. Capobianchi                                                                                                                                                                                                                                                                                                                  |
| EPI_ISL_560408, EPI_ISL_560409, EPI_ISL_560410, EPI_ISL_560411, EPI_ISL_560412                                                                                                                                                                                                                                                                                                                                                                                                                                                                                                                                                                                                                                                                                                                                                                                                                                                                                                                                                                                                                                                                                                                                                                                                                                                                                                                                                                                                                                                                                                                                                                                                                                                 | The National Institute of Public Health                                         | State Veterinary Institute Prague                                                                                                                                                                                                                                                                                               | Nagy, A.; Jirincova, H; Novakova, L.; Trnka, D.; Vecerova, J                                                                                                                                                                                                                                                                                                                                                                                                                                         |
| EPI_ISL_560568, EPI_ISL_560569, EPI_ISL_560570, EPI_ISL_560571, EPI_ISL_560572, EPI_ISL_560573, EPI_ISL_560574, EPI_ISL_560575, EPI_ISL_560576, EPI_ISL_560577, EPI_ISL_560578, EPI_ISL_560579, EPI_ISL_560580                                                                                                                                                                                                                                                                                                                                                                                                                                                                                                                                                                                                                                                                                                                                                                                                                                                                                                                                                                                                                                                                                                                                                                                                                                                                                                                                                                                                                                                                                                                 | see above                                                                       | hôpital                                                                                                                                                                                                                                                                                                                         | National Reference Center for Viruses of Respiratory Infections, Institut Pasteur, Paris                                                                                                                                                                                                                                                                                                                                                                                                             |
| EPI_ISL_560581, EPI_ISL_560582, EPI_ISL_560583, EPI_ISL_560584, EPI_ISL_560585, EPI_ISL_560586, EPI_ISL_560587, EPI_ISL_560588, EPI_ISL_560589, EPI_ISL_560590                                                                                                                                                                                                                                                                                                                                                                                                                                                                                                                                                                                                                                                                                                                                                                                                                                                                                                                                                                                                                                                                                                                                                                                                                                                                                                                                                                                                                                                                                                                                                                 | see above                                                                       | Hospital                                                                                                                                                                                                                                                                                                                        | National Reference Center for Viruses of Respiratory Infections, Institut Pasteur, Paris                                                                                                                                                                                                                                                                                                                                                                                                             |
| EPI_ISL_560591, EPI_ISL_560592, EPI_ISL_560593, EPI_ISL_560594, EPI_ISL_560595, EPI_ISL_560596, EPI_ISL_560597                                                                                                                                                                                                                                                                                                                                                                                                                                                                                                                                                                                                                                                                                                                                                                                                                                                                                                                                                                                                                                                                                                                                                                                                                                                                                                                                                                                                                                                                                                                                                                                                                 | see above                                                                       | hospital                                                                                                                                                                                                                                                                                                                        | National Reference Center for Viruses of Respiratory Infections, Institut Pasteur, Paris                                                                                                                                                                                                                                                                                                                                                                                                             |
| EPI_ISL_560598, EPI_ISL_560599, EPI_ISL_560600, EPI_ISL_560601, EPI_ISL_560602, EPI_ISL_560603, EPI_ISL_560604, EPI_ISL_560605, EPI_ISL_560606, EPI_ISL_560607, EPI_ISL_560608, EPI_ISL_560609, EPI_ISL_560610, EPI_ISL_560611, EPI_ISL_560612, EPI_ISL_560613, EPI_ISL_560614, EPI_ISL_560615, EPI_ISL_560616, EPI_ISL_560617, EPI_ISL_560618, EPI_ISL_560620, EPI_ISL_560621, EPI_ISL_560622, EPI_ISL_560623, EPI_ISL_560624, EPI_ISL_560625, EPI_ISL_560626, EPI_ISL_560627, EPI_ISL_560628, EPI_ISL_560629, EPI_ISL_560630, EPI_ISL_560631, EPI_ISL_560632, EPI_ISL_560633, EPI_ISL_560634, EPI_ISL_560635, EPI_ISL_560636                                                                                                                                                                                                                                                                                                                                                                                                                                                                                                                                                                                                                                                                                                                                                                                                                                                                                                                                                                                                                                                                                                 | see above                                                                       | Hospital                                                                                                                                                                                                                                                                                                                        | National Reference Center for Viruses of Respiratory Infections, Institut Pasteur, Paris                                                                                                                                                                                                                                                                                                                                                                                                             |
| EPI_ISL_560637, EPI_ISL_560638, EPI_ISL_560639, EPI_ISL_560640, EPI_ISL_560641, EPI_ISL_560642                                                                                                                                                                                                                                                                                                                                                                                                                                                                                                                                                                                                                                                                                                                                                                                                                                                                                                                                                                                                                                                                                                                                                                                                                                                                                                                                                                                                                                                                                                                                                                                                                                 | see above                                                                       | Labo Analyses Med                                                                                                                                                                                                                                                                                                               | National Reference Center for Viruses of Respiratory Infections, Institut Pasteur, Paris                                                                                                                                                                                                                                                                                                                                                                                                             |
| EPI_ISL_560643, EPI_ISL_560644, EPI_ISL_560645, EPI_ISL_560646                                                                                                                                                                                                                                                                                                                                                                                                                                                                                                                                                                                                                                                                                                                                                                                                                                                                                                                                                                                                                                                                                                                                                                                                                                                                                                                                                                                                                                                                                                                                                                                                                                                                 | see above                                                                       | Hospital                                                                                                                                                                                                                                                                                                                        | National Reference Center for Viruses of Respiratory Infections, Institut Pasteur, Paris                                                                                                                                                                                                                                                                                                                                                                                                             |
| EPI_ISL_560991                                                                                                                                                                                                                                                                                                                                                                                                                                                                                                                                                                                                                                                                                                                                                                                                                                                                                                                                                                                                                                                                                                                                                                                                                                                                                                                                                                                                                                                                                                                                                                                                                                                                                                                 | RSUD Dr. Soetomo                                                                | Institute of Tropical Disease, Universitas Airlangga                                                                                                                                                                                                                                                                            | Rima R Prasetya, Krisnoadi Rahardjo, Aldise M Nastri, Jezzy R Dewantari, Joni Wahyuhadi, Gatot Soegiarto, Laksmi Wulandari, Retno A Setyoningrum, Resti Yudhawati, Yohko K Shimizu, Mitsuhiro Nishimura, Yasuko Mori, Soejitto, Kazufumi Shimizu, Maria I Lusida                                                                                                                                                                                                                                     |
| EPI_ISL_566077, EPI_ISL_566078, EPI_ISL_566079, EPI_ISL_566080, EPI_ISL_566081, EPI_ISL_566082, EPI_ISL_566083                                                                                                                                                                                                                                                                                                                                                                                                                                                                                                                                                                                                                                                                                                                                                                                                                                                                                                                                                                                                                                                                                                                                                                                                                                                                                                                                                                                                                                                                                                                                                                                                                 | Pathogenic Microorganisms Variability Laboratory                                | WHO National Influenza Centre Russian Federation                                                                                                                                                                                                                                                                                | Andrey Komissarov, Artem Fadeev, Anna Ivanova, Kseniya Komissarova, Daria Danilenko, Dmitriy Lioznov, Nadezhda Kuznetsova, Elena Shidlovskaya, Elizaveta Divisenko, Ekaterina Milashenko, Kirill Krasnoslobotsev, Evgeniya Mukasheva, Anna Ignatieva, Svetlana Trushkova, Alexey Shchetnikov, Maria Nikiforova, Andrey Pochtoyvov, Valeria Bacalini, Evgeny Usachev, Olga Burgasova, Ludmila Kolobukhina, Svetlana Smetanina, Elena Burtseva, Artem Tkachuk, Vladimir Gushechin, Alexander Gintsburg |
| EPI_ISL_568577                                                                                                                                                                                                                                                                                                                                                                                                                                                                                                                                                                                                                                                                                                                                                                                                                                                                                                                                                                                                                                                                                                                                                                                                                                                                                                                                                                                                                                                                                                                                                                                                                                                                                                                 | The National Institute of Public Health                                         | State Veterinary Institute Prague                                                                                                                                                                                                                                                                                               | Nagy, A.; Jirincova, H; Novakova, L; Trnka,D; Vecerova, J                                                                                                                                                                                                                                                                                                                                                                                                                                            |
| EPI_ISL_568579                                                                                                                                                                                                                                                                                                                                                                                                                                                                                                                                                                                                                                                                                                                                                                                                                                                                                                                                                                                                                                                                                                                                                                                                                                                                                                                                                                                                                                                                                                                                                                                                                                                                                                                 | Virus Molecular Laboratory of the Microbiology and Virology Department          | INMI Lazzaro Spallanzani IRCCS                                                                                                                                                                                                                                                                                                  | Cesare E.M. Gruber, Martina Rueca, Barbara Bartolini, Francesco Messina, Silvia Meschi, Francesca Colavita, Concetta Castilletti, Elena Percivalle, Irene Cassaniti, Edoardo Vecchio Nepita, Fausto Baldanti, Maria R. Capobianchi, Antonio Di Caro                                                                                                                                                                                                                                                  |
| EPI_ISL_568686                                                                                                                                                                                                                                                                                                                                                                                                                                                                                                                                                                                                                                                                                                                                                                                                                                                                                                                                                                                                                                                                                                                                                                                                                                                                                                                                                                                                                                                                                                                                                                                                                                                                                                                 | RSUD Prof. DR. Margono Soekarjo                                                 | Eijkman Institute for Molecular Biology, Ministry of Research and Technology/National Agency for Research and Innovation                                                                                                                                                                                                        | Frilasita A Yudhaputri, Edison Johar, Hidayat Trimarsanto, Iskandar A Adnan, Willy Agustine, David H Muljono, Safarina G Malik, Herawati Sudoyo, Khin Saw Myint, Amin Soebandrio                                                                                                                                                                                                                                                                                                                     |
| EPI_ISL_568687                                                                                                                                                                                                                                                                                                                                                                                                                                                                                                                                                                                                                                                                                                                                                                                                                                                                                                                                                                                                                                                                                                                                                                                                                                                                                                                                                                                                                                                                                                                                                                                                                                                                                                                 | RSUP Fatmawati                                                                  | Eijkman Institute for Molecular Biology, Ministry of Research and Technology/National Agency for Research and Innovation                                                                                                                                                                                                        | Frilasita A Yudhaputri, Edison Johar, Hidayat Trimarsanto, Iskandar A Adnan, Willy Agustine, David H Muljono, Safarina G Malik, Herawati Sudoyo, Khin Saw Myint, Amin Soebandrio                                                                                                                                                                                                                                                                                                                     |
| EPI_ISL_568688                                                                                                                                                                                                                                                                                                                                                                                                                                                                                                                                                                                                                                                                                                                                                                                                                                                                                                                                                                                                                                                                                                                                                                                                                                                                                                                                                                                                                                                                                                                                                                                                                                                                                                                 | RS Pelní                                                                        | Eijkman Institute for Molecular Biology, Ministry of Research and Technology/National Agency for Research and Innovation                                                                                                                                                                                                        | Frilasita A Yudhaputri, Edison Johar, Hidayat Trimarsanto, Iskandar A Adnan, Willy Agustine, David H Muljono, Safarina G Malik, Herawati Sudoyo, Khin Saw Myint, Amin Soebandrio                                                                                                                                                                                                                                                                                                                     |
| EPI_ISL_568689                                                                                                                                                                                                                                                                                                                                                                                                                                                                                                                                                                                                                                                                                                                                                                                                                                                                                                                                                                                                                                                                                                                                                                                                                                                                                                                                                                                                                                                                                                                                                                                                                                                                                                                 | RS Pondok Indah Puri Indah                                                      | Eijkman Institute for Molecular Biology, Ministry of Research and Technology/National Agency for Research and Innovation                                                                                                                                                                                                        | Frilasita A Yudhaputri, Edison Johar, Hidayat Trimarsanto, Iskandar A Adnan, Willy Agustine, David H Muljono, Safarina G Malik, Herawati Sudoyo, Khin Saw Myint, Amin Soebandrio                                                                                                                                                                                                                                                                                                                     |

|                                                                                                                                                                                                                                                                                                                                                |                                                                                                                 |                                                                                                                                                                                                                                                                                                                                                                                                                                                                  |                                                                                                                                                                                                                                                                                                                                                                                                                                                                                                                                                                                                                                                                                                                                                                                                                                                                |
|------------------------------------------------------------------------------------------------------------------------------------------------------------------------------------------------------------------------------------------------------------------------------------------------------------------------------------------------|-----------------------------------------------------------------------------------------------------------------|------------------------------------------------------------------------------------------------------------------------------------------------------------------------------------------------------------------------------------------------------------------------------------------------------------------------------------------------------------------------------------------------------------------------------------------------------------------|----------------------------------------------------------------------------------------------------------------------------------------------------------------------------------------------------------------------------------------------------------------------------------------------------------------------------------------------------------------------------------------------------------------------------------------------------------------------------------------------------------------------------------------------------------------------------------------------------------------------------------------------------------------------------------------------------------------------------------------------------------------------------------------------------------------------------------------------------------------|
| EPI_ISL_568691                                                                                                                                                                                                                                                                                                                                 | RSUP Fatmawati                                                                                                  | Eijkman Institute for Molecular Biology, Ministry of Research and Technology/National Agency for Research and Innovation                                                                                                                                                                                                                                                                                                                                         | Frilasita A Yudhaputri, Edison Johar, Hidayat Trimarsanto, Iskandar A Adnan, Willy Agustine, David H Muljono, Safarina G Malik, Herawati Sudoyo, Khin Saw Myint, Amin Soebandrio                                                                                                                                                                                                                                                                                                                                                                                                                                                                                                                                                                                                                                                                               |
| EPI_ISL_568692                                                                                                                                                                                                                                                                                                                                 | RS Kramat 128                                                                                                   | Eijkman Institute for Molecular Biology, Ministry of Research and Technology/National Agency for Research and Innovation                                                                                                                                                                                                                                                                                                                                         | Frilasita A Yudhaputri, Edison Johar, Hidayat Trimarsanto, Iskandar A Adnan, Willy Agustine, David H Muljono, Safarina G Malik, Herawati Sudoyo, Khin Saw Myint, Amin Soebandrio                                                                                                                                                                                                                                                                                                                                                                                                                                                                                                                                                                                                                                                                               |
| EPI_ISL_568693                                                                                                                                                                                                                                                                                                                                 | RS Freeprot Tembagapura                                                                                         | Eijkman Institute for Molecular Biology, Ministry of Research and Technology/National Agency for Research and Innovation                                                                                                                                                                                                                                                                                                                                         | Frilasita A Yudhaputri, Edison Johar, Hidayat Trimarsanto, Iskandar A Adnan, Willy Agustine, David H Muljono, Safarina G Malik, Herawati Sudoyo, Khin Saw Myint, Amin Soebandrio                                                                                                                                                                                                                                                                                                                                                                                                                                                                                                                                                                                                                                                                               |
| EPI_ISL_568694                                                                                                                                                                                                                                                                                                                                 | RSUP Prof. Dr. R. Kandou Manado                                                                                 | Eijkman Institute for Molecular Biology, Ministry of Research and Technology/National Agency for Research and Innovation                                                                                                                                                                                                                                                                                                                                         | Frilasita A Yudhaputri, Edison Johar, Hidayat Trimarsanto, Iskandar A Adnan, Willy Agustine, David H Muljono, Safarina G Malik, Herawati Sudoyo, Khin Saw Myint, Amin Soebandrio                                                                                                                                                                                                                                                                                                                                                                                                                                                                                                                                                                                                                                                                               |
| EPI_ISL_568873, EPI_ISL_568874, EPI_ISL_568875                                                                                                                                                                                                                                                                                                 | Malaysia Genome Institute                                                                                       | Malaysia Genome Institute                                                                                                                                                                                                                                                                                                                                                                                                                                        | Mohd Noor Mat Isa, Iri Suhayu Sapijan, Yusuf Muhammad Noor, Nurhezreen Md Iqbal, Mohd Faizal Abu Bakar, Enizza Kasim, Shamsidar Sophie, Siti Noraini Othman, Azrin Ahmad, Nor Afza Johari, Shahrul Hisham Zainal Ariffin                                                                                                                                                                                                                                                                                                                                                                                                                                                                                                                                                                                                                                       |
| EPI_ISL_569858                                                                                                                                                                                                                                                                                                                                 | Area of Virology, Serology and Virology Division (SAVID), New South Wales Health Pathology Randwick             | Area of Virology, Serology and Virology Division (SAVID), New South Wales Health Pathology Randwick                                                                                                                                                                                                                                                                                                                                                              | Rawlinson, W., Deveson, I., Bull, R., Van Hal, S.                                                                                                                                                                                                                                                                                                                                                                                                                                                                                                                                                                                                                                                                                                                                                                                                              |
| EPI_ISL_569865, EPI_ISL_569866, EPI_ISL_569867, EPI_ISL_569868, EPI_ISL_569869, EPI_ISL_569870, EPI_ISL_569871, EPI_ISL_569872, EPI_ISL_569873, EPI_ISL_569875, EPI_ISL_569876, EPI_ISL_569877, EPI_ISL_569878, EPI_ISL_569879, EPI_ISL_569880, EPI_ISL_569881, EPI_ISL_569882, EPI_ISL_569883, EPI_ISL_569884, EPI_ISL_569885, EPI_ISL_569886 | see above                                                                                                       | Crosetto lab, Karolinska Institutet, SciLifeLab                                                                                                                                                                                                                                                                                                                                                                                                                  | Michele Simonetti, Maria Grazia Milia, Luuk Harbers, Ning Zhang, Anna Sapino, Valeria Ghisetti, Nicola Crosetto                                                                                                                                                                                                                                                                                                                                                                                                                                                                                                                                                                                                                                                                                                                                                |
| EPI_ISL_572320, EPI_ISL_572321, EPI_ISL_572322, EPI_ISL_572323, EPI_ISL_572324                                                                                                                                                                                                                                                                 | IZSM                                                                                                            | IZSM                                                                                                                                                                                                                                                                                                                                                                                                                                                             | Maurizio Viscardi, Lorena Cardillo, Giovanna Fusco                                                                                                                                                                                                                                                                                                                                                                                                                                                                                                                                                                                                                                                                                                                                                                                                             |
| EPI_ISL_572330, EPI_ISL_572331                                                                                                                                                                                                                                                                                                                 | Institute for Virology, University Hospital Duesseldorf, Medical Faculty, Heinrich-Heine-University Duesseldorf | Institute for Virology, University Hospital Duesseldorf, Medical Faculty, Heinrich-Heine-University Duesseldorf                                                                                                                                                                                                                                                                                                                                                  | Maximilian Damagnez, Verena Keitel, Björn Jensen, Nadine Lübke, Lisa Müller, Philipp Ostermann, Tina Senff, Ortwin Adams, Gerald Antoch, Johannes Bode, Edwin Böike, Saskia Elben, Torsten Feldt, Johannes C. Fischer, , Anselm Kunstein, Caroline Klindt, Alexander Klier, Tom Lüdde, Annemarie Mohring, Jennifer Neubert, Heiner Schaal, Ansgar Schulz, Jörg Timm, Andreas Walker                                                                                                                                                                                                                                                                                                                                                                                                                                                                            |
| EPI_ISL_572351, EPI_ISL_572386                                                                                                                                                                                                                                                                                                                 | LACEN/PE                                                                                                        | Wallaulab, Aggeu Magalhaes Institute                                                                                                                                                                                                                                                                                                                                                                                                                             | Marcelo Henrique Santos Paiva, Duschinka Ribeiro Duarte Guedes, Cássia Docena, Matheus Filgueira Bezerra, Filipe Zimmer Dezordi, Laís Ceschini Machado, Larissa Krokovskiy, Elisama Helvecio, Alexandre Freitas da Silva, Lyudson Richardson Silva Vasconcelos, Antonio Mauro Rezende, Severino Jefferson Ribeiro da Silva, Kamila Gaudêncio da Silva Sales, Bruna Santos Lima Figueiredo de Sá, Derciliano Lopes da Cruz, Claudio Eduardo Cavalcanti, Armando de Menezes Neto, Caroline Targino Alves da Silva, Renata Pessoa Germano Mendes, Maria Almerice Lopes da Silva, Tiago Gráf, Paola Cristina Resende, Gonzalo Bello0, Michelle da Silva Barros, Wheverton Ricardo Correia do Nascimento., Rodrigo Moraes Loyo Arcoverde, Luciane Caroline Albuquerque Bezerra, Sinalval Pinto Brandão Filho, Constância Flávia Junqueira Ayres, Gabriel Luz Wallau |
| EPI_ISL_572397                                                                                                                                                                                                                                                                                                                                 | Institute for Virology, University Hospital Duesseldorf, Medical Faculty, Heinrich-Heine-University Duesseldorf | Institute for Virology, University Hospital Duesseldorf, Medical Faculty, Heinrich-Heine-University Duesseldorf                                                                                                                                                                                                                                                                                                                                                  | Maximilian Damagnez, Verena Keitel, Björn Jensen, Nadine Lübke, Lisa Müller, Philipp Ostermann, Tina Senff, Ortwin Adams, Philipp Albrecht, Gerald Antoch, Johannes Bode, Edwin Böike, Saskia Elben, Torsten Feldt, Johannes C. Fischer, , Anselm Kunstein, Caroline Klindt, Alexander Klier, Tom Lüdde, Annemarie Mohring, Jennifer Neubert, Heiner Schaal, Ansgar Schulz, Jörg Timm, Andreas Walker                                                                                                                                                                                                                                                                                                                                                                                                                                                          |
| EPI_ISL_572398                                                                                                                                                                                                                                                                                                                                 | Laboratory of Biology and Identification of Arboviruses                                                         | Pathogenic Microorganisms Variability Laboratory                                                                                                                                                                                                                                                                                                                                                                                                                 | Alexey Shchetinin, Maria Nikiforova, Andrei Siniavin, Victor Larichev, Alina Kozlova, Muhammad Saifulin, Alexey Prilpov, Vladimir Gushchin, Alexander Gintsburg                                                                                                                                                                                                                                                                                                                                                                                                                                                                                                                                                                                                                                                                                                |
| EPI_ISL_573152, EPI_ISL_574259                                                                                                                                                                                                                                                                                                                 | Institute for Virology, University Hospital Duesseldorf, Medical Faculty, Heinrich-Heine-University Duesseldorf | Institute for Virology, University Hospital Duesseldorf, Medical Faculty, Heinrich-Heine-University Duesseldorf                                                                                                                                                                                                                                                                                                                                                  | Maximilian Damagnez, Verena Keitel, Björn Jensen, Nadine Lübke, Lisa Müller, Philipp Ostermann, Tina Senff, Ortwin Adams, Philipp Albrecht, Gerald Antoch, Johannes Bode, Edwin Böike, Saskia Elben, Torsten Feldt, Johannes C. Fischer, , Anselm Kunstein, Caroline Klindt, Alexander Klier, Tom Lüdde, Annemarie Mohring, Jennifer Neubert, Heiner Schaal, Ansgar Schulz, Jörg Timm, Andreas Walker                                                                                                                                                                                                                                                                                                                                                                                                                                                          |
| EPI_ISL_574431                                                                                                                                                                                                                                                                                                                                 | Hospital IESS Babahoyo                                                                                          | Institute of Microbiology, Universidad San Francisco de Quito                                                                                                                                                                                                                                                                                                                                                                                                    | Belén Prado-Vivar, Sully Márquez, Juan José Guadalupe, Monica Becerra-Wong, Fernanda Zurita, Bernardo Gutiérrez, Francisco Cordova, Ninfa Henríquez, Killen Briones-Zamora, Killen Briones-Claudette, Verónica Barragán, Patricio Rojas-Silva, Gabriel Trueba, Michelle Grunauer, Paul Cárdenas                                                                                                                                                                                                                                                                                                                                                                                                                                                                                                                                                                |
| EPI_ISL_574577                                                                                                                                                                                                                                                                                                                                 | Hospital Municipal Dr. Ignacio Proença de Gouvea                                                                | Instituto Adolfo Lutz, Interdisciplinary Procedures Center, Strategic Laboratory                                                                                                                                                                                                                                                                                                                                                                                 | Claudio Tavares Sacchi, Claudia Regina Gonçalves, Erica Valessa Ramos Gomes, Karoline Rodrigues Campos                                                                                                                                                                                                                                                                                                                                                                                                                                                                                                                                                                                                                                                                                                                                                         |
| EPI_ISL_574578                                                                                                                                                                                                                                                                                                                                 | Hospital Municipal Mário Gatti                                                                                  | Instituto Adolfo Lutz, Interdisciplinary Procedures Center, Strategic Laboratory                                                                                                                                                                                                                                                                                                                                                                                 | Claudio Tavares Sacchi, Claudia Regina Gonçalves, Erica Valessa Ramos Gomes, Karoline Rodrigues Campos                                                                                                                                                                                                                                                                                                                                                                                                                                                                                                                                                                                                                                                                                                                                                         |
| EPI_ISL_574579                                                                                                                                                                                                                                                                                                                                 | Hospital Municipal Dr. Ignacio Proença de Gouvea                                                                | Instituto Adolfo Lutz, Interdisciplinary Procedures Center, Strategic Laboratory                                                                                                                                                                                                                                                                                                                                                                                 | Claudio Tavares Sacchi, Claudia Regina Gonçalves, Erica Valessa Ramos Gomes, Karoline Rodrigues Campos                                                                                                                                                                                                                                                                                                                                                                                                                                                                                                                                                                                                                                                                                                                                                         |
| EPI_ISL_574580                                                                                                                                                                                                                                                                                                                                 | Hospital Cidade Tiradentes Carmen Prudente                                                                      | Instituto Adolfo Lutz, Interdisciplinary Procedures Center, Strategic Laboratory                                                                                                                                                                                                                                                                                                                                                                                 | Claudio Tavares Sacchi, Claudia Regina Gonçalves, Erica Valessa Ramos Gomes, Karoline Rodrigues Campos                                                                                                                                                                                                                                                                                                                                                                                                                                                                                                                                                                                                                                                                                                                                                         |
| EPI_ISL_574582                                                                                                                                                                                                                                                                                                                                 | Hospital Municipal Dr. Jose Soares Hungria                                                                      | Instituto Adolfo Lutz, Interdisciplinary Procedures Center, Strategic Laboratory                                                                                                                                                                                                                                                                                                                                                                                 | Claudio Tavares Sacchi, Claudia Regina Gonçalves, Erica Valessa Ramos Gomes, Karoline Rodrigues Campos                                                                                                                                                                                                                                                                                                                                                                                                                                                                                                                                                                                                                                                                                                                                                         |
| EPI_ISL_574583                                                                                                                                                                                                                                                                                                                                 | Secretaria Municipal de Saude de Jandira                                                                        | Instituto Adolfo Lutz, Interdisciplinary Procedures Center, Strategic Laboratory                                                                                                                                                                                                                                                                                                                                                                                 | Claudio Tavares Sacchi, Claudia Regina Gonçalves, Erica Valessa Ramos Gomes, Karoline Rodrigues Campos                                                                                                                                                                                                                                                                                                                                                                                                                                                                                                                                                                                                                                                                                                                                                         |
| EPI_ISL_574588                                                                                                                                                                                                                                                                                                                                 | Hospital Estadual Sumare                                                                                        | Instituto Adolfo Lutz, Interdisciplinary Procedures Center, Strategic Laboratory                                                                                                                                                                                                                                                                                                                                                                                 | Claudio Tavares Sacchi, Claudia Regina Gonçalves, Erica Valessa Ramos Gomes, Karoline Rodrigues Campos                                                                                                                                                                                                                                                                                                                                                                                                                                                                                                                                                                                                                                                                                                                                                         |
| EPI_ISL_574589                                                                                                                                                                                                                                                                                                                                 | Hospital Municipal Dr. Jose Soares Hungria                                                                      | Instituto Adolfo Lutz, Interdisciplinary Procedures Center, Strategic Laboratory                                                                                                                                                                                                                                                                                                                                                                                 | Claudio Tavares Sacchi, Claudia Regina Gonçalves, Erica Valessa Ramos Gomes, Karoline Rodrigues Campos                                                                                                                                                                                                                                                                                                                                                                                                                                                                                                                                                                                                                                                                                                                                                         |
| EPI_ISL_574590                                                                                                                                                                                                                                                                                                                                 | Unidade de Pronto Atendimento UPA I Santa Isabel                                                                | Instituto Adolfo Lutz, Interdisciplinary Procedures Center, Strategic Laboratory                                                                                                                                                                                                                                                                                                                                                                                 | Claudio Tavares Sacchi, Claudia Regina Gonçalves, Erica Valessa Ramos Gomes, Karoline Rodrigues Campos                                                                                                                                                                                                                                                                                                                                                                                                                                                                                                                                                                                                                                                                                                                                                         |
| EPI_ISL_574591, EPI_ISL_574592                                                                                                                                                                                                                                                                                                                 | Hospital Domingos Leonardo Ceravolo Presidente Prudente                                                         | Instituto Adolfo Lutz, Interdisciplinary Procedures Center, Strategic Laboratory                                                                                                                                                                                                                                                                                                                                                                                 | Claudio Tavares Sacchi, Claudia Regina Gonçalves, Erica Valessa Ramos Gomes, Karoline Rodrigues Campos                                                                                                                                                                                                                                                                                                                                                                                                                                                                                                                                                                                                                                                                                                                                                         |
| EPI_ISL_574593                                                                                                                                                                                                                                                                                                                                 | CS II Dr. Antonio Vicoso Moreira de Rezende Sumare                                                              | Instituto Adolfo Lutz, Interdisciplinary Procedures Center, Strategic Laboratory                                                                                                                                                                                                                                                                                                                                                                                 | Claudio Tavares Sacchi, Claudia Regina Gonçalves, Erica Valessa Ramos Gomes, Karoline Rodrigues Campos                                                                                                                                                                                                                                                                                                                                                                                                                                                                                                                                                                                                                                                                                                                                                         |
| EPI_ISL_574594                                                                                                                                                                                                                                                                                                                                 | Hospital Escola da Universidade de Taubate                                                                      | Instituto Adolfo Lutz, Interdisciplinary Procedures Center, Strategic Laboratory                                                                                                                                                                                                                                                                                                                                                                                 | Claudio Tavares Sacchi, Claudia Regina Gonçalves, Erica Valessa Ramos Gomes, Karoline Rodrigues Campos                                                                                                                                                                                                                                                                                                                                                                                                                                                                                                                                                                                                                                                                                                                                                         |
| EPI_ISL_574595                                                                                                                                                                                                                                                                                                                                 | Hospital Geral de Vila Penteado Dr. Jose Pamgella                                                               | Instituto Adolfo Lutz, Interdisciplinary Procedures Center, Strategic Laboratory                                                                                                                                                                                                                                                                                                                                                                                 | Claudio Tavares Sacchi, Claudia Regina Gonçalves, Erica Valessa Ramos Gomes, Karoline Rodrigues Campos                                                                                                                                                                                                                                                                                                                                                                                                                                                                                                                                                                                                                                                                                                                                                         |
| EPI_ISL_574596                                                                                                                                                                                                                                                                                                                                 | CS II Dr. Antonio Vicoso Moreira de Rezende Sumare                                                              | Instituto Adolfo Lutz, Interdisciplinary Procedures Center, Strategic Laboratory                                                                                                                                                                                                                                                                                                                                                                                 | Claudio Tavares Sacchi, Claudia Regina Gonçalves, Erica Valessa Ramos Gomes, Karoline Rodrigues Campos                                                                                                                                                                                                                                                                                                                                                                                                                                                                                                                                                                                                                                                                                                                                                         |
| EPI_ISL_574597                                                                                                                                                                                                                                                                                                                                 | Secretaria Municipal de Saude de Jarinu                                                                         | Instituto Adolfo Lutz, Interdisciplinary Procedures Center, Strategic Laboratory                                                                                                                                                                                                                                                                                                                                                                                 | Claudio Tavares Sacchi, Claudia Regina Gonçalves, Erica Valessa Ramos Gomes, Karoline Rodrigues Campos                                                                                                                                                                                                                                                                                                                                                                                                                                                                                                                                                                                                                                                                                                                                                         |
| EPI_ISL_574598                                                                                                                                                                                                                                                                                                                                 | Servico de Verificacao de Obito SVO                                                                             | Instituto Adolfo Lutz, Interdisciplinary Procedures Center, Strategic Laboratory                                                                                                                                                                                                                                                                                                                                                                                 | Claudio Tavares Sacchi, Claudia Regina Gonçalves, Erica Valessa Ramos Gomes, Karoline Rodrigues Campos                                                                                                                                                                                                                                                                                                                                                                                                                                                                                                                                                                                                                                                                                                                                                         |
| EPI_ISL_574603                                                                                                                                                                                                                                                                                                                                 | RS Freeprot Tembagapura                                                                                         | Eijkman Institute for Molecular Biology, Ministry of Research and Technology/National Agency for Research and Innovation                                                                                                                                                                                                                                                                                                                                         | Frilasita A Yudhaputri, Edison Johar, Hidayat Trimarsanto, Iskandar A Adnan, Willy Agustine, David H Muljono, Safarina G Malik, Herawati Sudoyo, Khin Saw Myint, Amin Soebandrio                                                                                                                                                                                                                                                                                                                                                                                                                                                                                                                                                                                                                                                                               |
| EPI_ISL_574604                                                                                                                                                                                                                                                                                                                                 | RSUP Prof. Dr. R. Kandou Manado                                                                                 | Eijkman Institute for Molecular Biology, Ministry of Research and Technology/National Agency for Research and Innovation                                                                                                                                                                                                                                                                                                                                         | Frilasita A Yudhaputri, Edison Johar, Hidayat Trimarsanto, Iskandar A Adnan, Willy Agustine, David H Muljono, Safarina G Malik, Herawati Sudoyo, Khin Saw Myint, Amin Soebandrio                                                                                                                                                                                                                                                                                                                                                                                                                                                                                                                                                                                                                                                                               |
| EPI_ISL_574605                                                                                                                                                                                                                                                                                                                                 | RSUP Dr. Sardjito                                                                                               | Eijkman Institute for Molecular Biology, Ministry of Research and Technology/National Agency for Research and Innovation                                                                                                                                                                                                                                                                                                                                         | Frilasita A Yudhaputri, Edison Johar, Hidayat Trimarsanto, Iskandar A Adnan, Willy Agustine, David H Muljono, Safarina G Malik, Herawati Sudoyo, Khin Saw Myint, Amin Soebandrio                                                                                                                                                                                                                                                                                                                                                                                                                                                                                                                                                                                                                                                                               |
| EPI_ISL_574606                                                                                                                                                                                                                                                                                                                                 | RS Siloam Purwakarta                                                                                            | Eijkman Institute for Molecular Biology, Ministry of Research and Technology/National Agency for Research and Innovation                                                                                                                                                                                                                                                                                                                                         | Frilasita A Yudhaputri, Edison Johar, Hidayat Trimarsanto, Iskandar A Adnan, Willy Agustine, David H Muljono, Safarina G Malik, Herawati Sudoyo, Khin Saw Myint, Amin Soebandrio                                                                                                                                                                                                                                                                                                                                                                                                                                                                                                                                                                                                                                                                               |
| EPI_ISL_574607                                                                                                                                                                                                                                                                                                                                 | RS Husada                                                                                                       | Eijkman Institute for Molecular Biology, Ministry of Research and Technology/National Agency for Research and Innovation                                                                                                                                                                                                                                                                                                                                         | Frilasita A Yudhaputri, Edison Johar, Hidayat Trimarsanto, Iskandar A Adnan, Willy Agustine, David H Muljono, Safarina G Malik, Herawati Sudoyo, Khin Saw Myint, Amin Soebandrio                                                                                                                                                                                                                                                                                                                                                                                                                                                                                                                                                                                                                                                                               |
| EPI_ISL_574608                                                                                                                                                                                                                                                                                                                                 | RS Mitra Keluarga Kelapa Gading                                                                                 | Eijkman Institute for Molecular Biology, Ministry of Research and Technology/National Agency for Research and Innovation                                                                                                                                                                                                                                                                                                                                         | Frilasita A Yudhaputri, Edison Johar, Hidayat Trimarsanto, Iskandar A Adnan, Willy Agustine, David H Muljono, Safarina G Malik, Herawati Sudoyo, Khin Saw Myint, Amin Soebandrio                                                                                                                                                                                                                                                                                                                                                                                                                                                                                                                                                                                                                                                                               |
| EPI_ISL_574609                                                                                                                                                                                                                                                                                                                                 | RSJPD Harapan Kita                                                                                              | Eijkman Institute for Molecular Biology, Ministry of Research and Technology/National Agency for Research and Innovation                                                                                                                                                                                                                                                                                                                                         | Frilasita A Yudhaputri, Edison Johar, Hidayat Trimarsanto, Iskandar A Adnan, Willy Agustine, David H Muljono, Safarina G Malik, Herawati Sudoyo, Khin Saw Myint, Amin Soebandrio                                                                                                                                                                                                                                                                                                                                                                                                                                                                                                                                                                                                                                                                               |
| EPI_ISL_574610                                                                                                                                                                                                                                                                                                                                 | Puskemas Tambora                                                                                                | Eijkman Institute for Molecular Biology, Ministry of Research and Technology/National Agency for Research and Innovation                                                                                                                                                                                                                                                                                                                                         | Frilasita A Yudhaputri, Edison Johar, Hidayat Trimarsanto, Iskandar A Adnan, Willy Agustine, David H Muljono, Safarina G Malik, Herawati Sudoyo, Khin Saw Myint, Amin Soebandrio                                                                                                                                                                                                                                                                                                                                                                                                                                                                                                                                                                                                                                                                               |
| EPI_ISL_574611                                                                                                                                                                                                                                                                                                                                 | RS Premier Bintaro                                                                                              | Eijkman Institute for Molecular Biology, Ministry of Research and Technology/National Agency for Research and Innovation                                                                                                                                                                                                                                                                                                                                         | Frilasita A Yudhaputri, Edison Johar, Hidayat Trimarsanto, Iskandar A Adnan, Willy Agustine, David H Muljono, Safarina G Malik, Herawati Sudoyo, Khin Saw Myint, Amin Soebandrio                                                                                                                                                                                                                                                                                                                                                                                                                                                                                                                                                                                                                                                                               |
| EPI_ISL_574612                                                                                                                                                                                                                                                                                                                                 | RS Hermina Mekarsari                                                                                            | Eijkman Institute for Molecular Biology, Ministry of Research and Technology/National Agency for Research and Innovation                                                                                                                                                                                                                                                                                                                                         | Frilasita A Yudhaputri, Edison Johar, Hidayat Trimarsanto, Iskandar A Adnan, Willy Agustine, David H Muljono, Safarina G Malik, Herawati Sudoyo, Khin Saw Myint, Amin Soebandrio                                                                                                                                                                                                                                                                                                                                                                                                                                                                                                                                                                                                                                                                               |
| EPI_ISL_574614                                                                                                                                                                                                                                                                                                                                 | RS Kramat 128                                                                                                   | Eijkman Institute for Molecular Biology, Ministry of Research and Technology/National Agency for Research and Innovation                                                                                                                                                                                                                                                                                                                                         | Frilasita A Yudhaputri, Edison Johar, Hidayat Trimarsanto, Iskandar A Adnan, Willy Agustine, David H Muljono, Safarina G Malik, Herawati Sudoyo, Khin Saw Myint, Amin Soebandrio                                                                                                                                                                                                                                                                                                                                                                                                                                                                                                                                                                                                                                                                               |
| EPI_ISL_574615                                                                                                                                                                                                                                                                                                                                 | RS Harapan Bunda                                                                                                | Eijkman Institute for Molecular Biology, Ministry of Research and Technology/National Agency for Research and Innovation                                                                                                                                                                                                                                                                                                                                         | Frilasita A Yudhaputri, Edison Johar, Hidayat Trimarsanto, Iskandar A Adnan, Willy Agustine, David H Muljono, Safarina G Malik, Herawati Sudoyo, Khin Saw Myint, Amin Soebandrio                                                                                                                                                                                                                                                                                                                                                                                                                                                                                                                                                                                                                                                                               |
| EPI_ISL_574616, EPI_ISL_574617                                                                                                                                                                                                                                                                                                                 | RS Kramat 128                                                                                                   | Eijkman Institute for Molecular Biology, Ministry of Research and Technology/National Agency for Research and Innovation                                                                                                                                                                                                                                                                                                                                         | Frilasita A Yudhaputri, Edison Johar, Hidayat Trimarsanto, Iskandar A Adnan, Willy Agustine, David H Muljono, Safarina G Malik, Herawati Sudoyo, Khin Saw Myint, Amin Soebandrio                                                                                                                                                                                                                                                                                                                                                                                                                                                                                                                                                                                                                                                                               |
| EPI_ISL_574618                                                                                                                                                                                                                                                                                                                                 | RS Kramat 128                                                                                                   | Eijkman Institute for Molecular Biology, Ministry of Research and Technology/National Agency for Research and Innovation                                                                                                                                                                                                                                                                                                                                         | Hidayat Trimarsanto, Frilasita A Yudhaputri, Edison Johar, Iskandar A Adnan, Willy Agustine, David H Muljono, Safarina G Malik, Herawati Sudoyo, Khin Saw Myint, Amin Soebandrio                                                                                                                                                                                                                                                                                                                                                                                                                                                                                                                                                                                                                                                                               |
| EPI_ISL_574619, EPI_ISL_574620, EPI_ISL_574621, EPI_ISL_574622, EPI_ISL_574623                                                                                                                                                                                                                                                                 | BTKLPP Kelas I Manado                                                                                           | Eijkman Institute for Molecular Biology, Ministry of Research and Technology/National Agency for Research and Innovation                                                                                                                                                                                                                                                                                                                                         | Hidayat Trimarsanto, Frilasita A Yudhaputri, Edison Johar, Iskandar A Adnan, Willy Agustine, David H Muljono, Safarina G Malik, Herawati Sudoyo, Khin Saw Myint, Amin Soebandrio                                                                                                                                                                                                                                                                                                                                                                                                                                                                                                                                                                                                                                                                               |
| EPI_ISL_575330                                                                                                                                                                                                                                                                                                                                 | National Institute for Viral Disease Control and Prevention, China CDC                                          | National Institute for Viral Disease Control and Prevention, China CDC                                                                                                                                                                                                                                                                                                                                                                                           | Rongbao Gao, Kang Xiao, Qinqin Song, ZhiQiang Xia, Dong Xia, Juan Song, Haijun Du, Yuan He, Shuai Pang, Xuancheng Lu, Guizhen Wu, Geogia Fu Gao, Jun Han                                                                                                                                                                                                                                                                                                                                                                                                                                                                                                                                                                                                                                                                                                       |
| EPI_ISL_575331                                                                                                                                                                                                                                                                                                                                 | RSUD Wates                                                                                                      | Genetics Working Group (Pokja Genetik) Faculty of Medicine, Public Health and Nursing Universitas Gadjah Mada (FK-KMK UGM); Disease Investigation Center Wates Ministry of Agriculture Indonesia; Department of Microbiology FK-KMK UGM; Laboratorium Diagnostik Yayasan Tahija World Mosquito Program (WMP) Yogyakarta Center for Tropical Medicine FK-KMK UGM; Integrated Research Center FK-KMK UGM; Department of Computer Science and Electronics FMIPA UGM | Gunadi, Hendra Wibawa, . Marcellus, Mohamad S. Hakim, Edwin W. Daniwijaya, Ludhang P. Rizki, Endah Supriyati, Eggi Arguni, Titik Nuryastuti, Tri Wibawa, Dwi AA Nugrahainingsih, Afahayati, Siswanto, Kristy Iskandar, Nungki Anggorowati, Bastianto Kusumajaya, Zumnrati Ahmad, Alvin S. Kalim, Susan Simanjaya                                                                                                                                                                                                                                                                                                                                                                                                                                                                                                                                               |
| EPI_ISL_576113                                                                                                                                                                                                                                                                                                                                 | RSUP Dr. Sardjito                                                                                               | Genetics Working Group (Pokja Genetik) Faculty of Medicine, Public Health and Nursing Universitas Gadjah Mada (FK-KMK UGM); Disease Investigation Center Wates Ministry of Agriculture Indonesia; Department of Microbiology FK-KMK UGM; Laboratorium Diagnostik Yayasan Tahija World Mosquito Program (WMP) Yogyakarta Center for Tropical Medicine FK-KMK UGM; Integrated Research Center FK-KMK UGM; Department of Computer Science and Electronics FMIPA UGM | Gunadi, Hendra Wibawa, . Marcellus, Mohamad S. Hakim, Edwin W. Daniwijaya, Ludhang P. Rizki, Endah Supriyati, Eggi Arguni, Titik Nuryastuti, Tri Wibawa, Dwi AA Nugrahainingsih, Afahayati, Siswanto, Kristy Iskandar, Nungki Anggorowati, Ika Trisnawati, Riat El Khair, William Widitjiarso, Fadli Fahri                                                                                                                                                                                                                                                                                                                                                                                                                                                                                                                                                     |
| EPI_ISL_576114                                                                                                                                                                                                                                                                                                                                 | RSUP Dr. Sardjito                                                                                               | Genetics Working Group (Pokja Genetik) Faculty of Medicine, Public Health and Nursing Universitas Gadjah Mada (FK-KMK UGM); Disease Investigation Center Wates Ministry of Agriculture Indonesia; Department of Microbiology FK-KMK UGM; Laboratorium Diagnostik Yayasan Tahija World Mosquito Program (WMP) Yogyakarta Center for Tropical Medicine FK-KMK UGM; Integrated Research Center FK-KMK UGM; Department of Computer Science and Electronics FMIPA UGM | Gunadi, Hendra Wibawa, . Marcellus, Mohamad S. Hakim, Edwin W. Daniwijaya, Ludhang P. Rizki, Endah Supriyati, Eggi Arguni, Titik Nuryastuti, Tri Wibawa, Dwi AA Nugrahainingsih, Afahayati, Siswanto, Kristy Iskandar, Nungki Anggorowati, Ika Trisnawati, Riat El Khair, Audric Kenny Tedja, Aditya Rifqi Fauzi                                                                                                                                                                                                                                                                                                                                                                                                                                                                                                                                               |
| EPI_ISL_576115                                                                                                                                                                                                                                                                                                                                 | RSUP Dr. Sardjito                                                                                               | Genetics Working Group (Pokja Genetik) Faculty of Medicine, Public Health and Nursing Universitas Gadjah Mada (FK-KMK UGM); Disease Investigation Center Wates Ministry of Agriculture Indonesia; Department of Microbiology FK-KMK UGM; Laboratorium Diagnostik Yayasan Tahija World Mosquito Program (WMP) Yogyakarta Center for Tropical Medicine FK-KMK UGM; Integrated Research Center FK-KMK UGM; Department of Computer Science and Electronics FMIPA UGM | Gunadi, Hendra Wibawa, . Marcellus, Mohamad S. Hakim, Edwin W. Daniwijaya, Ludhang P. Rizki, Endah Supriyati, Eggi Arguni, Titik Nuryastuti, Tri Wibawa, Dwi AA Nugrahainingsih, Afahayati, Siswanto, Kristy Iskandar, Nungki Anggorowati, Ika Trisnawati, Riat El Khair, Yunita Puspawadi, Osman Sianipar, Umi Solekha Intansari, Elizabeth Henny Herringtiyas, Ira Puspitawati, Nur Imma Fatimah Harahap, Untung Wirawan, Maria Patricia Ingringiani                                                                                                                                                                                                                                                                                                                                                                                                         |
| EPI_ISL_576116                                                                                                                                                                                                                                                                                                                                 | RSUP Dr. Sardjito                                                                                               | Genetics Working Group (Pokja Genetik) Faculty of Medicine, Public Health and Nursing Universitas Gadjah Mada (FK-KMK UGM); Disease Investigation Center Wates Ministry of Agriculture Indonesia; Department of Microbiology FK-KMK UGM; Laboratorium Diagnostik Yayasan Tahija World Mosquito Program (WMP) Yogyakarta Center for Tropical Medicine FK-KMK UGM; Integrated Research Center FK-KMK UGM; Department of Computer Science and Electronics FMIPA UGM | Gunadi, Hendra Wibawa, . Marcellus, Mohamad S. Hakim, Edwin W. Daniwijaya, Ludhang P. Rizki, Endah Supriyati, Eggi Arguni, Titik Nuryastuti, Tri Wibawa, Dwi AA Nugrahainingsih, Afahayati, Siswanto, Kristy Iskandar, Nungki Anggorowati, Ika Trisnawati, Sumardi, Eko Budiono, Bambang Sigit Riyanto, Heni Retnowulan, Munawar Gani, Satria Maulana, Nur Rahmi Ananda, Riat El Khair, Yunita Puspawadi, Osman Sianipar, Umi Solekha Intansari, Elizabeth Henny Herringtiyas, Ira Puspitawati, Nur Imma Fatimah Harahap, Ririn Enggy Yuliyanti, Alvin Santoso Kalim                                                                                                                                                                                                                                                                                           |

|                                                                                                                                                                                                                                                                                                                                                                                                                                                                                |                                                                                                                                          |                                                                                                                                                                                                                                                                                                                                                                                                                                                                                                                                                          |                                                                                                                                                                                                                                                                                                                                                                                                                                                                                                                                                                                     |
|--------------------------------------------------------------------------------------------------------------------------------------------------------------------------------------------------------------------------------------------------------------------------------------------------------------------------------------------------------------------------------------------------------------------------------------------------------------------------------|------------------------------------------------------------------------------------------------------------------------------------------|----------------------------------------------------------------------------------------------------------------------------------------------------------------------------------------------------------------------------------------------------------------------------------------------------------------------------------------------------------------------------------------------------------------------------------------------------------------------------------------------------------------------------------------------------------|-------------------------------------------------------------------------------------------------------------------------------------------------------------------------------------------------------------------------------------------------------------------------------------------------------------------------------------------------------------------------------------------------------------------------------------------------------------------------------------------------------------------------------------------------------------------------------------|
| EPI_ISL_576128                                                                                                                                                                                                                                                                                                                                                                                                                                                                 | RSUP Dr. Sardjito                                                                                                                        | Genetics Working Group (Pokja Genetik) Faculty of Medicine, Public Health and Nursing Universitas Gadjah Mada (FK-KMK UGM); Disease Investigation Center Wates Ministry of Agriculture Indonesia; Department of Microbiology FK-KMK UGM; Laboratorium Diagnostik Yayasan Tahija World Mosquito Program (WMP) Yogyakarta Center for Tropical Medicine FK-KMK UGM; Integrated Research Center FK-KMK UGM; Department of Computer Science and Electronics FMIPA UGM                                                                                         | Gunadi, Hendra Wibawa, Marcellus, Mohamad S. Hakim, Edwin W. Daniwijaya, Ludhang P. Rizki, Endah Supriyati, Eggi Arguni, Titik Nuryastuti, Tri Wibawa, Dwi AA Nugrahaningsih, Afiahayati, Siswanto, Kristy Iskandar, Nungki Anggorowati, Ika Trisnawati, Sumardi, Eiko Budiono, Bambang Sigit Riyanto, Heni Retnowulan, Munawar Gani, Satria Maulana, Nur Rahmi Ananda, Riati El Khair, Yunika Puspawati, Osman Sianipar, Umi Solekhhah Intansari, Elizabeth Henry Heringtiyas, Ira Puspitawati, Nur Imma Fatimah Harahap, Dyah Ayu Puspitarani, Kemal Athollah                     |
| EPI_ISL_576130                                                                                                                                                                                                                                                                                                                                                                                                                                                                 | RSUP Dr. Sardjito                                                                                                                        | Genetics Working Group (Pokja Genetik) Faculty of Medicine, Public Health and Nursing Universitas Gadjah Mada (FK-KMK UGM); Disease Investigation Center Wates Ministry of Agriculture Indonesia; Department of Microbiology FK-KMK UGM; Laboratorium Diagnostik Yayasan Tahija World Mosquito Program (WMP) Yogyakarta Center for Tropical Medicine FK-KMK UGM; Integrated Research Center FK-KMK UGM; Department of Computer Science and Electronics FMIPA UGM                                                                                         | Gunadi, Hendra Wibawa, Marcellus, Mohamad S. Hakim, Edwin W. Daniwijaya, Ludhang P. Rizki, Endah Supriyati, Eggi Arguni, Titik Nuryastuti, Tri Wibawa, Dwi AA Nugrahaningsih, Afiahayati, Siswanto, Kristy Iskandar, Nungki Anggorowati, Rina Triasih, Amalia Setyati, Dwikisworo Setyowirni, Ida Sufri Laksanawati, Cahya Dewi Satria, Titis Widowati, Elisabeth Siti Herini, Riati El Khair, Yunika Puspawati, Osman Sianipar, Umi Solekhhah Intansari, Elizabeth Henry Heringtiyas, Ira Puspitawati, Nur Imma Fatimah Harahap, Alvin S. Kalim, Susan Simanjaya, Desyifa Mursalin |
| EPI_ISL_576145                                                                                                                                                                                                                                                                                                                                                                                                                                                                 | RSA Universitas Gadjah Mada                                                                                                              | Genetics Working Group (Pokja Genetik) Faculty of Medicine, Public Health and Nursing Universitas Gadjah Mada (FK-KMK UGM); Disease Investigation Center Wates Ministry of Agriculture Indonesia; Department of Microbiology FK-KMK UGM; Laboratorium Diagnostik Yayasan Tahija World Mosquito Program (WMP) Yogyakarta Center for Tropical Medicine FK-KMK UGM; Integrated Research Center FK-KMK UGM; Department of Computer Science and Electronics FMIPA UGM                                                                                         | Gunadi, Hendra Wibawa, Marcellus, Mohamad S. Hakim, Edwin W. Daniwijaya, Ludhang P. Rizki, Endah Supriyati, Eggi Arguni, Titik Nuryastuti, Tri Wibawa, Dwi AA Nugrahaningsih, Afiahayati, Siswanto, Kristy Iskandar, Nungki Anggorowati, William Widitjarso, Fadil Fahri                                                                                                                                                                                                                                                                                                            |
| EPI_ISL_576146, EPI_ISL_576147, EPI_ISL_576148                                                                                                                                                                                                                                                                                                                                                                                                                                 | Department of Respiratory & Other Viral Infections of L.V. Gromashevsky Institute of Epidemiology & Infectious Diseases NAMS of Ukraine  | Department of Respiratory & Other Viral Infections of L.V. Gromashevsky Institute of Epidemiology & Infectious Diseases NAMS of Ukraine, JSC "Farmak"                                                                                                                                                                                                                                                                                                                                                                                                    | Alla Mironenko, Ihor Kravchuk, Ludmyla Bolotova, Larysa Radchenko, Nataliia Teteriuk                                                                                                                                                                                                                                                                                                                                                                                                                                                                                                |
| EPI_ISL_576149                                                                                                                                                                                                                                                                                                                                                                                                                                                                 | Department of Respiratory & Other Viral Infections of L.V. Gromashevsky Institute of Epidemiology & Infectious Diseases NAMS of Ukraine  | Department of Respiratory & Other Viral Infections of L.V. Gromashevsky Institute of Epidemiology & Infectious Diseases NAMS of Ukraine, JSC "Farmak"                                                                                                                                                                                                                                                                                                                                                                                                    | Alla Mironenko, Andriy Goy, Ihor Kravchuk, Ludmyla Bolotova, Larysa Radchenko, Nataliia Teteriuk                                                                                                                                                                                                                                                                                                                                                                                                                                                                                    |
| EPI_ISL_576258, EPI_ISL_576259, EPI_ISL_576260                                                                                                                                                                                                                                                                                                                                                                                                                                 | Instituto de Diagnostico y Referencia Epidemiologicos (INDRE)                                                                            | Instituto de Diagnostico y Referencia Epidemiologicos (INDRE)                                                                                                                                                                                                                                                                                                                                                                                                                                                                                            | Gisela Barrera-Badillo , Abril Rodriguez-Maldonado, Claudia Wong-Arambula , Natividad Cruz-Ortiz, Tatiana Nunez-Garcia, Dayanira Arellano-Suarez, Fabiola Garces-Ayala, Edgar Mendieta-Condado, Lucia Hernandez-Rivas, Irma Lopez-Martinez, Ernesto Ramirez-Gonzalez.                                                                                                                                                                                                                                                                                                               |
| EPI_ISL_576261, EPI_ISL_576262, EPI_ISL_576263                                                                                                                                                                                                                                                                                                                                                                                                                                 | Instituto de Diagnostico y Referencia Epidemiologicos (INDRE)                                                                            | Instituto de Diagnostico y Referencia Epidemiologicos (INDRE)                                                                                                                                                                                                                                                                                                                                                                                                                                                                                            | Gisela Barrera-Badillo , Abril Rodriguez-Maldonado, Claudia Wong-Arambula , Natividad Cruz-Ortiz, Tatiana Nunez-Garcia, Dayanira Arellano-Suarez, Adnan Araiza-Rodriguez, Edgar Mendieta-Condado, Lucia Hernandez-Rivas, Irma Lopez-Martinez, Ernesto Ramirez-Gonzalez.                                                                                                                                                                                                                                                                                                             |
| EPI_ISL_576264, EPI_ISL_576265                                                                                                                                                                                                                                                                                                                                                                                                                                                 | Instituto de Diagnostico y Referencia Epidemiologicos (INDRE)                                                                            | Instituto de Diagnostico y Referencia Epidemiologicos (INDRE)                                                                                                                                                                                                                                                                                                                                                                                                                                                                                            | Ernesto Ramirez-Gonzalez, Abril Rodriguez-Maldonado, Claudia Wong-Arambula , Natividad Cruz-Ortiz, Tatiana Nunez-Garcia, Dayanira Arellano-Suarez, Adnan Araiza-Rodriguez, Edgar Mendieta-Condado, Lucia Hernandez-Rivas, Irma Lopez-Martinez, Gisela Barrera-Badillo.                                                                                                                                                                                                                                                                                                              |
| EPI_ISL_576266, EPI_ISL_576267, EPI_ISL_576268, EPI_ISL_576269, EPI_ISL_576270, EPI_ISL_576271                                                                                                                                                                                                                                                                                                                                                                                 | Instituto de Diagnostico y Referencia Epidemiologicos (INDRE)                                                                            | Instituto de Diagnostico y Referencia Epidemiologicos (INDRE)                                                                                                                                                                                                                                                                                                                                                                                                                                                                                            | Ernesto Ramirez-Gonzalez, Abril Rodriguez-Maldonado, Claudia Wong-Arambula , Natividad Cruz-Ortiz, Tatiana Nunez-Garcia, Dayanira Arellano-Suarez, Adnan Araiza-Rodriguez, Fabiola Garces-Ayala, Lucia Hernandez-Rivas, Irma Lopez-Martinez, Gisela Barrera-Badillo.                                                                                                                                                                                                                                                                                                                |
| EPI_ISL_576272                                                                                                                                                                                                                                                                                                                                                                                                                                                                 | Instituto de Diagnostico y Referencia Epidemiologicos (INDRE)                                                                            | Instituto de Diagnostico y Referencia Epidemiologicos (INDRE)                                                                                                                                                                                                                                                                                                                                                                                                                                                                                            | Gisela Barrera-Badillo , Abril Rodriguez-Maldonado, Claudia Wong-Arambula , Natividad Cruz-Ortiz, Tatiana Nunez-Garcia, Dayanira Arellano-Suarez, Fabiola Garces-Ayala, Edgar Mendieta-Condado, Lucia Hernandez-Rivas, Irma Lopez-Martinez, Ernesto Ramirez-Gonzalez.                                                                                                                                                                                                                                                                                                               |
| EPI_ISL_576273                                                                                                                                                                                                                                                                                                                                                                                                                                                                 | Instituto de Diagnostico y Referencia Epidemiologicos (INDRE)                                                                            | Instituto de Diagnostico y Referencia Epidemiologicos (INDRE)                                                                                                                                                                                                                                                                                                                                                                                                                                                                                            | Ernesto Ramirez-Gonzalez, Abril Rodriguez-Maldonado, Claudia Wong-Arambula , Natividad Cruz-Ortiz, Tatiana Nunez-Garcia, Dayanira Arellano-Suarez, Adnan Araiza-Rodriguez, Fabiola Garces-Ayala, Lucia Hernandez-Rivas, Irma Lopez-Martinez, Gisela Barrera-Badillo.                                                                                                                                                                                                                                                                                                                |
| EPI_ISL_576274, EPI_ISL_576275, EPI_ISL_576276                                                                                                                                                                                                                                                                                                                                                                                                                                 | Instituto de Diagnostico y Referencia Epidemiologicos (INDRE)                                                                            | Instituto de Diagnostico y Referencia Epidemiologicos (INDRE)                                                                                                                                                                                                                                                                                                                                                                                                                                                                                            | Gisela Barrera-Badillo , Abril Rodriguez-Maldonado, Claudia Wong-Arambula , Natividad Cruz-Ortiz, Tatiana Nunez-Garcia, Dayanira Arellano-Suarez, Adnan Araiza-Rodriguez, Edgar Mendieta-Condado, Lucia Hernandez-Rivas, Irma Lopez-Martinez, Ernesto Ramirez-Gonzalez.                                                                                                                                                                                                                                                                                                             |
| EPI_ISL_576277, EPI_ISL_576278                                                                                                                                                                                                                                                                                                                                                                                                                                                 | Instituto de Diagnostico y Referencia Epidemiologicos (INDRE)                                                                            | Instituto de Diagnostico y Referencia Epidemiologicos (INDRE)                                                                                                                                                                                                                                                                                                                                                                                                                                                                                            | Ernesto Ramirez-Gonzalez, Abril Rodriguez-Maldonado, Claudia Wong-Arambula , Natividad Cruz-Ortiz, Tatiana Nunez-Garcia, Dayanira Arellano-Suarez, Adnan Araiza-Rodriguez, Edgar Mendieta-Condado, Lucia Hernandez-Rivas, Irma Lopez-Martinez, Gisela Barrera-Badillo.                                                                                                                                                                                                                                                                                                              |
| EPI_ISL_576279                                                                                                                                                                                                                                                                                                                                                                                                                                                                 | Instituto de Diagnostico y Referencia Epidemiologicos (INDRE)                                                                            | Instituto de Diagnostico y Referencia Epidemiologicos (INDRE)                                                                                                                                                                                                                                                                                                                                                                                                                                                                                            | Ernesto Ramirez-Gonzalez, Abril Rodriguez-Maldonado, Claudia Wong-Arambula , Natividad Cruz-Ortiz, Tatiana Nunez-Garcia, Dayanira Arellano-Suarez, Adnan Araiza-Rodriguez, Fabiola Garces-Ayala, Lucia Hernandez-Rivas, Irma Lopez-Martinez, Gisela Barrera-Badillo.                                                                                                                                                                                                                                                                                                                |
| EPI_ISL_576383                                                                                                                                                                                                                                                                                                                                                                                                                                                                 | RSUD Budi Rahayu Kota Magelang                                                                                                           | Genetics Working Group (Pokja Genetik) Faculty of Medicine, Public Health and Nursing Universitas Gadjah Mada (FK-KMK UGM); Disease Investigation Center Wates Ministry of Agriculture Indonesia; Department of Microbiology FK-KMK UGM; Laboratorium Diagnostik Yayasan Tahija World Mosquito Program (WMP) Yogyakarta Center for Tropical Medicine FK-KMK UGM; Integrated Research Center FK-KMK UGM; Department of Computer Science and Electronics FMIPA UGM; Balai Besar Teknik Kesehatan Lingkungan dan Pengendalian Penyakit (BBTKLPP) Yogyakarta | Gunadi, Hendra Wibawa, Marcellus, Mohamad S. Hakim, Edwin W. Daniwijaya, Ludhang P. Rizki, Endah Supriyati, Eggi Arguni, Titik Nuryastuti, Tri Wibawa, Dwi AA Nugrahaningsih, Afiahayati, Siswanto, Kristy Iskandar, Nungki Anggorowati, Irene, Indaryati, Havid Setyawan, Ari Meliyanti, Merlina Sari Situmeang, Audric Kenny Tedja, Aditya Rifqi Fauzi                                                                                                                                                                                                                            |
| EPI_ISL_577624, EPI_ISL_577625, EPI_ISL_577626, EPI_ISL_577627, EPI_ISL_577628, EPI_ISL_577629, EPI_ISL_577630, EPI_ISL_577631, EPI_ISL_577632, EPI_ISL_577633, EPI_ISL_577634, EPI_ISL_577635, EPI_ISL_577636, EPI_ISL_577637, EPI_ISL_577638                                                                                                                                                                                                                                 | see above                                                                                                                                | The National Institute of Public Health<br>Hospital General Juan Ramón Jiménez                                                                                                                                                                                                                                                                                                                                                                                                                                                                           | State Veterinary Institute Prague<br>Instituto de Salud Carlos III                                                                                                                                                                                                                                                                                                                                                                                                                                                                                                                  |
| EPI_ISL_578186                                                                                                                                                                                                                                                                                                                                                                                                                                                                 |                                                                                                                                          |                                                                                                                                                                                                                                                                                                                                                                                                                                                                                                                                                          | Nagy,Arjincova,H;Novakova,L;Tmka,D;Vecerova,J<br>Iglesias-Caballero, M. Molinero Calamita, M. González-Esguevillas, M. Camarero, S. Pozo, F. Casas, I. Jiménez, P. Jiménez, M. Zaballos, A. Monzón, S. Varona, S. Juliá, M. Cuesta, I, J. Saavedra                                                                                                                                                                                                                                                                                                                                  |
| EPI_ISL_578187, EPI_ISL_578188                                                                                                                                                                                                                                                                                                                                                                                                                                                 |                                                                                                                                          | Hospital Virgen de las Nieves                                                                                                                                                                                                                                                                                                                                                                                                                                                                                                                            | Instituto de Salud Carlos III<br>Iglesias-Caballero, M. Molinero Calamita, M. González-Esguevillas, M. Camarero, S. Pozo, F. Casas, I. Jiménez, P. Jiménez, M. Zaballos, A. Monzón, S. Varona, S. Juliá, M. Cuesta, I, J, M Navarro                                                                                                                                                                                                                                                                                                                                                 |
| EPI_ISL_578189                                                                                                                                                                                                                                                                                                                                                                                                                                                                 |                                                                                                                                          | Hospital Universitario Miguel Servet                                                                                                                                                                                                                                                                                                                                                                                                                                                                                                                     | Instituto de Salud Carlos III<br>Iglesias-Caballero, M. Molinero Calamita, M. González-Esguevillas, M. Camarero, S. Pozo, F. Casas, I. Jiménez, P. Jiménez, M. Zaballos, A. Monzón, S. Varona, S. Juliá, M. Cuesta, I, A. Rezusta                                                                                                                                                                                                                                                                                                                                                   |
| EPI_ISL_578190, EPI_ISL_578191                                                                                                                                                                                                                                                                                                                                                                                                                                                 |                                                                                                                                          | Hospital Clínico Universitario Lozano Blesa                                                                                                                                                                                                                                                                                                                                                                                                                                                                                                              | Instituto de Salud Carlos III<br>Iglesias-Caballero, M. Molinero Calamita, M. González-Esguevillas, M. Camarero, S. Pozo, F. Casas, I. Jiménez, P. Jiménez, M. Zaballos, A. Monzón, S. Varona, S. Juliá, M. Cuesta, I, R. Benito                                                                                                                                                                                                                                                                                                                                                    |
| EPI_ISL_578192, EPI_ISL_578193                                                                                                                                                                                                                                                                                                                                                                                                                                                 |                                                                                                                                          | Hospital Universitario Miguel Servet                                                                                                                                                                                                                                                                                                                                                                                                                                                                                                                     | Instituto de Salud Carlos III<br>Iglesias-Caballero, M. Molinero Calamita, M. González-Esguevillas, M. Camarero, S. Pozo, F. Casas, I. Jiménez, P. Jiménez, M. Zaballos, A. Monzón, S. Varona, S. Juliá, M. Cuesta, I, A. Rezusta                                                                                                                                                                                                                                                                                                                                                   |
| EPI_ISL_578194                                                                                                                                                                                                                                                                                                                                                                                                                                                                 |                                                                                                                                          | Complejo Hospitalario Universitario La Coruna                                                                                                                                                                                                                                                                                                                                                                                                                                                                                                            | Instituto de Salud Carlos III<br>Iglesias-Caballero, M. Molinero Calamita, M. González-Esguevillas, M. Camarero, S. Pozo, F. Casas, I. Jiménez, P. Jiménez, M. Zaballos, A. Monzón, S. Varona, S. Juliá, M. Cuesta, I, J. López                                                                                                                                                                                                                                                                                                                                                     |
| EPI_ISL_578195                                                                                                                                                                                                                                                                                                                                                                                                                                                                 |                                                                                                                                          | Complejo Hospitalario de Orense                                                                                                                                                                                                                                                                                                                                                                                                                                                                                                                          | Instituto de Salud Carlos III<br>Iglesias-Caballero, M. Molinero Calamita, M. González-Esguevillas, M. Camarero, S. Pozo, F. Casas, I. Jiménez, P. Jiménez, M. Zaballos, A. Monzón, S. Varona, S. Juliá, M. Cuesta, I, M. García                                                                                                                                                                                                                                                                                                                                                    |
| EPI_ISL_578196                                                                                                                                                                                                                                                                                                                                                                                                                                                                 |                                                                                                                                          | Hospital San Pedro                                                                                                                                                                                                                                                                                                                                                                                                                                                                                                                                       | Instituto de Salud Carlos III<br>Iglesias-Caballero, M. Molinero Calamita, M. González-Esguevillas, M. Camarero, S. Pozo, F. Casas, I. Jiménez, P. Jiménez, M. Zaballos, A. Monzón, S. Varona, S. Juliá, M. Cuesta, I, J, M Azcona                                                                                                                                                                                                                                                                                                                                                  |
| EPI_ISL_578197                                                                                                                                                                                                                                                                                                                                                                                                                                                                 |                                                                                                                                          | Hospital San Pedro                                                                                                                                                                                                                                                                                                                                                                                                                                                                                                                                       | Instituto de Salud Carlos III<br>Iglesias-Caballero, M. Molinero Calamita, M. González-Esguevillas, M. Camarero, S. Pozo, F. Casas, I. Jiménez, P. Jiménez, M. Zaballos, A. Monzón, S. Varona, S. Juliá, M. Cuesta, I, C. Alonso                                                                                                                                                                                                                                                                                                                                                    |
| EPI_ISL_578198, EPI_ISL_578199                                                                                                                                                                                                                                                                                                                                                                                                                                                 |                                                                                                                                          | Hospital San Pedro                                                                                                                                                                                                                                                                                                                                                                                                                                                                                                                                       | Instituto de Salud Carlos III<br>Iglesias-Caballero, M. Molinero Calamita, M. González-Esguevillas, M. Camarero, S. Pozo, F. Casas, I. Jiménez, P. Jiménez, M. Zaballos, A. Monzón, S. Varona, S. Juliá, M. Cuesta, I, M. Blasco                                                                                                                                                                                                                                                                                                                                                    |
| EPI_ISL_578200, EPI_ISL_578201                                                                                                                                                                                                                                                                                                                                                                                                                                                 |                                                                                                                                          | Hospital San Pedro                                                                                                                                                                                                                                                                                                                                                                                                                                                                                                                                       | Instituto de Salud Carlos III<br>Iglesias-Caballero, M. Molinero Calamita, M. González-Esguevillas, M. Camarero, S. Pozo, F. Casas, I. Jiménez, P. Jiménez, M. Zaballos, A. Monzón, S. Varona, S. Juliá, M. Cuesta, I, C. Alonso                                                                                                                                                                                                                                                                                                                                                    |
| EPI_ISL_582030                                                                                                                                                                                                                                                                                                                                                                                                                                                                 | Biology Department, College of Science, Al-Muthanna University                                                                           | International Centre for Genetic Engineering and Biotechnology (ICGEB) and ARGO Open Lab Platform                                                                                                                                                                                                                                                                                                                                                                                                                                                        | Nihad Al-Rashedi, Danilo Licastro, Sreejith Rajasekharan, Simone Dal Monego, Alessandro Marcello                                                                                                                                                                                                                                                                                                                                                                                                                                                                                    |
| EPI_ISL_582033                                                                                                                                                                                                                                                                                                                                                                                                                                                                 | Department of Pathology, School of Medicine, Imam Khomeini Hospital, Tehran University of Medical Sciences                               | Genetics Research Center. University Of Social Welfare And Rehabilitation Sciences                                                                                                                                                                                                                                                                                                                                                                                                                                                                       | Zohreh Fattahi, Marzieh Mohseni, Khadijeh Jalalvand, Azam Ghaziasadi, Seyedeh elham Mortazavi, Ali Jafarpour, Azar Hadadi, Alireza Abdollahi, Ali Jafarpour, Azam Ghaziasadi, Seyedeh elham Mortazavi, Saber Soltani, Reza Najafipour , Kimia Kahrizi, Seyed Mohammad Hazeri, Hossein Najmabadi                                                                                                                                                                                                                                                                                     |
| EPI_ISL_582124                                                                                                                                                                                                                                                                                                                                                                                                                                                                 | Malaysia Genome Institute                                                                                                                | Malaysia Genome Institute                                                                                                                                                                                                                                                                                                                                                                                                                                                                                                                                | Mohd Noor Mat Isa, Iri Suhayu Sopian, Yusuf Muhammad Noor, Nurhezreen Md Iqbal, Mohd Faizal Abu Bakar, Enizza Kasim, Shamsidar Sopie, Siti Noraini Othman, Azrin Ahmad, Nor Azfa Johari, Shahrlul Hisham Zainal Ariffin                                                                                                                                                                                                                                                                                                                                                             |
| EPI_ISL_582125, EPI_ISL_582126                                                                                                                                                                                                                                                                                                                                                                                                                                                 | Sheikh Khalifa Medical City                                                                                                              | Molecular Surveillance lab Sheikh Khalifa Medical City                                                                                                                                                                                                                                                                                                                                                                                                                                                                                                   | Amirtharaj Francis, Sajeed Abdul, Hala Imambaccus, Sahar Almarzooqi, Hiba Saud, Stefan Weber                                                                                                                                                                                                                                                                                                                                                                                                                                                                                        |
| EPI_ISL_582127, EPI_ISL_582128, EPI_ISL_582129, EPI_ISL_582130, EPI_ISL_582131, EPI_ISL_582132                                                                                                                                                                                                                                                                                                                                                                                 | Antwerp University Hospital                                                                                                              | Institute of Tropical Medicine                                                                                                                                                                                                                                                                                                                                                                                                                                                                                                                           | Philippe Selhorst, Colin Anthony                                                                                                                                                                                                                                                                                                                                                                                                                                                                                                                                                    |
| EPI_ISL_582509                                                                                                                                                                                                                                                                                                                                                                                                                                                                 | Department of Respiratory and other Viral Infections of L.V.Gromashevsky Institute of Epidemiology & Infectious Diseases NAMS of Ukraine | Department of Respiratory and other Viral Infections of L.V.Gromashevsky Institute of Epidemiology & Infectious Diseases NAMS of Ukraine, JSC "Farmak"                                                                                                                                                                                                                                                                                                                                                                                                   | Alla Mironenko, Andriy Goy, Ihor Kravchuk, Ludmyla Bolotova, Larysa Radchenko, Nataliia Teteriuk                                                                                                                                                                                                                                                                                                                                                                                                                                                                                    |
| EPI_ISL_582510                                                                                                                                                                                                                                                                                                                                                                                                                                                                 | Department of Respiratory and other Viral Infections of L.V.Gromashevsky Institute of Epidemiology & Infectious Diseases NAMS of Ukraine | Department of Respiratory and other Viral Infections of L.V.Gromashevsky Institute of Epidemiology & Infectious Diseases NAMS of Ukraine, JSC "Farmak"                                                                                                                                                                                                                                                                                                                                                                                                   | Alla Mironenko, Andriy Goy, Ihor Kravchuk, Ludmyla Bolotova, Larysa Radchenko, Nataliia Teteriuk                                                                                                                                                                                                                                                                                                                                                                                                                                                                                    |
| EPI_ISL_582511, EPI_ISL_582512, EPI_ISL_582513                                                                                                                                                                                                                                                                                                                                                                                                                                 | Department of Respiratory and other Viral Infections of L.V.Gromashevsky Institute of Epidemiology & Infectious Diseases NAMS of Ukraine | Department of Respiratory and other Viral Infections of L.V.Gromashevsky Institute of Epidemiology & Infectious Diseases NAMS of Ukraine, JSC "Farmak"                                                                                                                                                                                                                                                                                                                                                                                                   | Alla Mironenko, Andriy Goy, Ihor Kravchuk, Ludmyla Bolotova, Larysa Radchenko, Nataliia Teteriuk                                                                                                                                                                                                                                                                                                                                                                                                                                                                                    |
| EPI_ISL_582608, EPI_ISL_582613, EPI_ISL_582620, EPI_ISL_582624, EPI_ISL_582625, EPI_ISL_582632, EPI_ISL_582642, EPI_ISL_582643, EPI_ISL_582644, EPI_ISL_582645, EPI_ISL_582646, EPI_ISL_582647, EPI_ISL_582648, EPI_ISL_582649, EPI_ISL_582650, EPI_ISL_582651, EPI_ISL_582652, EPI_ISL_582653, EPI_ISL_582657, EPI_ISL_582659, EPI_ISL_582662, EPI_ISL_582663, EPI_ISL_582674, EPI_ISL_582675, EPI_ISL_582679, EPI_ISL_582680, EPI_ISL_582681, EPI_ISL_582683, EPI_ISL_582688 | see above                                                                                                                                | Sheikh Khalifa Medical City                                                                                                                                                                                                                                                                                                                                                                                                                                                                                                                              | Molecular/Surveillance lab Sheikh Khalifa Medical City<br>Amirtharaj Francis, Sajeed Abdul, Hala Imambaccus, Sahar Almarzooqi, Hiba Saud, Stefan Weber                                                                                                                                                                                                                                                                                                                                                                                                                              |
| EPI_ISL_583426                                                                                                                                                                                                                                                                                                                                                                                                                                                                 | Garcia-Sastre Laboratory, Department of Microbiology, Icahn School of Medicine at Mount Sinai                                            | van Bakel Laboratory, Genetics and Genomics Sciences, Icahn School of Medicine at Mount Sinai                                                                                                                                                                                                                                                                                                                                                                                                                                                            | Teresa Aydllo, Ana S. Gonzalez-Reiche, Sadaf Aslam, Adriana van de Guchte, Zenab Khan, Ajay Obla, Jayeeta Dutta, Harm van Bakel, Judith Aberg, Adolfo Garcia-Sastre, Gunjan Shah, Tobias Hohl, Genovefa Papanicolaou, Miguel-Angel Perales, Kent Sepkowitz, Ngolela Esther Babady, and Mini Kamboj                                                                                                                                                                                                                                                                                  |
| EPI_ISL_583427, EPI_ISL_583428                                                                                                                                                                                                                                                                                                                                                                                                                                                 | Memorial Sloan Kettering Cancer Center                                                                                                   | van Bakel Laboratory, Genetics and Genomics Sciences, Icahn School of Medicine at Mount Sinai                                                                                                                                                                                                                                                                                                                                                                                                                                                            | Teresa Aydllo, Ana S. Gonzalez-Reiche, Sadaf Aslam, Adriana van de Guchte, Zenab Khan, Ajay Obla, Jayeeta Dutta, Harm van Bakel, Judith Aberg, Adolfo Garcia-Sastre, Gunjan Shah, Tobias Hohl, Genovefa Papanicolaou, Miguel-Angel Perales, Kent Sepkowitz, Ngolela Esther Babady, and Mini Kamboj                                                                                                                                                                                                                                                                                  |

|                                                                                                                                                |                                                                                                               |                                                                                                               |                                                                                                                                                                                                                                                                                                                                                                       |
|------------------------------------------------------------------------------------------------------------------------------------------------|---------------------------------------------------------------------------------------------------------------|---------------------------------------------------------------------------------------------------------------|-----------------------------------------------------------------------------------------------------------------------------------------------------------------------------------------------------------------------------------------------------------------------------------------------------------------------------------------------------------------------|
| EPI_ISL_583429                                                                                                                                 | Garcia-Sastre Laboratory, Department of Microbiology, Icahn School of Medicine at Mount Sinai                 | van Bakel Laboratory, Genetics and Genomics Sciences, Icahn School of Medicine at Mount Sinai                 | Teresa Aydllo, Ana S. Gonzalez-Reiche, Sadaf Aslam, Adriana van de Guchte, Zenab Khan, Ajay Obla, Jayeeta Dutta, Harm van Bakel, Judith Aberg, Adolfo Garcia-Sastre, Gunjan Shah, Tobias Hohl, Genovefa Papanicolaou, Miguel-Angel Perales, Kent Sepkowitz, Ngolela Esther Babady, and Mini Kamboj                                                                    |
| EPI_ISL_583431, EPI_ISL_583432, EPI_ISL_583433                                                                                                 | Memorial Sloan Kettering Cancer Center                                                                        | van Bakel Laboratory, Genetics and Genomics Sciences, Icahn School of Medicine at Mount Sinai                 | Teresa Aydllo, Ana S. Gonzalez-Reiche, Sadaf Aslam, Adriana van de Guchte, Zenab Khan, Ajay Obla, Jayeeta Dutta, Harm van Bakel, Judith Aberg, Adolfo Garcia-Sastre, Gunjan Shah, Tobias Hohl, Genovefa Papanicolaou, Miguel-Angel Perales, Kent Sepkowitz, Ngolela Esther Babady, and Mini Kamboj                                                                    |
| EPI_ISL_583434, EPI_ISL_583435, EPI_ISL_583436                                                                                                 | Garcia-Sastre Laboratory, Department of Microbiology, Icahn School of Medicine at Mount Sinai                 | van Bakel Laboratory, Genetics and Genomics Sciences, Icahn School of Medicine at Mount Sinai                 | Teresa Aydllo, Ana S. Gonzalez-Reiche, Sadaf Aslam, Adriana van de Guchte, Zenab Khan, Ajay Obla, Jayeeta Dutta, Harm van Bakel, Judith Aberg, Adolfo Garcia-Sastre, Gunjan Shah, Tobias Hohl, Genovefa Papanicolaou, Miguel-Angel Perales, Kent Sepkowitz, Ngolela Esther Babady, and Mini Kamboj                                                                    |
| EPI_ISL_583437, EPI_ISL_583439, EPI_ISL_583440                                                                                                 | Memorial Sloan Kettering Cancer Center                                                                        | van Bakel Laboratory, Genetics and Genomics Sciences, Icahn School of Medicine at Mount Sinai                 | Teresa Aydllo, Ana S. Gonzalez-Reiche, Sadaf Aslam, Adriana van de Guchte, Zenab Khan, Ajay Obla, Jayeeta Dutta, Harm van Bakel, Judith Aberg, Adolfo Garcia-Sastre, Gunjan Shah, Tobias Hohl, Genovefa Papanicolaou, Miguel-Angel Perales, Kent Sepkowitz, Ngolela Esther Babady, and Mini Kamboj                                                                    |
| EPI_ISL_583441, EPI_ISL_583442                                                                                                                 | Garcia-Sastre Laboratory, Department of Microbiology, Icahn School of Medicine at Mount Sinai                 | van Bakel Laboratory, Genetics and Genomics Sciences, Icahn School of Medicine at Mount Sinai                 | Teresa Aydllo, Ana S. Gonzalez-Reiche, Sadaf Aslam, Adriana van de Guchte, Zenab Khan, Ajay Obla, Jayeeta Dutta, Harm van Bakel, Judith Aberg, Adolfo Garcia-Sastre, Gunjan Shah, Tobias Hohl, Genovefa Papanicolaou, Miguel-Angel Perales, Kent Sepkowitz, Ngolela Esther Babady, and Mini Kamboj                                                                    |
| EPI_ISL_583443, EPI_ISL_583445, EPI_ISL_583446, EPI_ISL_583448, EPI_ISL_583449, EPI_ISL_583456, EPI_ISL_583457                                 | Memorial Sloan Kettering Cancer Center                                                                        | van Bakel Laboratory, Genetics and Genomics Sciences, Icahn School of Medicine at Mount Sinai                 | Teresa Aydllo, Ana S. Gonzalez-Reiche, Sadaf Aslam, Adriana van de Guchte, Zenab Khan, Ajay Obla, Jayeeta Dutta, Harm van Bakel, Judith Aberg, Adolfo Garcia-Sastre, Gunjan Shah, Tobias Hohl, Genovefa Papanicolaou, Miguel-Angel Perales, Kent Sepkowitz, Ngolela Esther Babady, and Mini Kamboj                                                                    |
| EPI_ISL_583458, EPI_ISL_583459                                                                                                                 | Garcia-Sastre Laboratory, Department of Microbiology, Icahn School of Medicine at Mount Sinai                 | van Bakel Laboratory, Genetics and Genomics Sciences, Icahn School of Medicine at Mount Sinai                 | Teresa Aydllo, Ana S. Gonzalez-Reiche, Sadaf Aslam, Adriana van de Guchte, Zenab Khan, Ajay Obla, Jayeeta Dutta, Harm van Bakel, Judith Aberg, Adolfo Garcia-Sastre, Gunjan Shah, Tobias Hohl, Genovefa Papanicolaou, Miguel-Angel Perales, Kent Sepkowitz, Ngolela Esther Babady, and Mini Kamboj                                                                    |
| EPI_ISL_583460, EPI_ISL_583461, EPI_ISL_583462                                                                                                 | Memorial Sloan Kettering Cancer Center                                                                        | van Bakel Laboratory, Genetics and Genomics Sciences, Icahn School of Medicine at Mount Sinai                 | Teresa Aydllo, Ana S. Gonzalez-Reiche, Sadaf Aslam, Adriana van de Guchte, Zenab Khan, Ajay Obla, Jayeeta Dutta, Harm van Bakel, Judith Aberg, Adolfo Garcia-Sastre, Gunjan Shah, Tobias Hohl, Genovefa Papanicolaou, Miguel-Angel Perales, Kent Sepkowitz, Ngolela Esther Babady, and Mini Kamboj                                                                    |
| EPI_ISL_583463, EPI_ISL_583464                                                                                                                 | Garcia-Sastre Laboratory, Department of Microbiology, Icahn School of Medicine at Mount Sinai                 | van Bakel Laboratory, Genetics and Genomics Sciences, Icahn School of Medicine at Mount Sinai                 | Teresa Aydllo, Ana S. Gonzalez-Reiche, Sadaf Aslam, Adriana van de Guchte, Zenab Khan, Ajay Obla, Jayeeta Dutta, Harm van Bakel, Judith Aberg, Adolfo Garcia-Sastre, Gunjan Shah, Tobias Hohl, Genovefa Papanicolaou, Miguel-Angel Perales, Kent Sepkowitz, Ngolela Esther Babady, and Mini Kamboj                                                                    |
| EPI_ISL_583465, EPI_ISL_583466                                                                                                                 | Memorial Sloan Kettering Cancer Center                                                                        | van Bakel Laboratory, Genetics and Genomics Sciences, Icahn School of Medicine at Mount Sinai                 | Teresa Aydllo, Ana S. Gonzalez-Reiche, Sadaf Aslam, Adriana van de Guchte, Zenab Khan, Ajay Obla, Jayeeta Dutta, Harm van Bakel, Judith Aberg, Adolfo Garcia-Sastre, Gunjan Shah, Tobias Hohl, Genovefa Papanicolaou, Miguel-Angel Perales, Kent Sepkowitz, Ngolela Esther Babady, and Mini Kamboj                                                                    |
| EPI_ISL_583467                                                                                                                                 | Garcia-Sastre Laboratory, Department of Microbiology, Icahn School of Medicine at Mount Sinai                 | van Bakel Laboratory, Genetics and Genomics Sciences, Icahn School of Medicine at Mount Sinai                 | Teresa Aydllo, Ana S. Gonzalez-Reiche, Sadaf Aslam, Adriana van de Guchte, Zenab Khan, Ajay Obla, Jayeeta Dutta, Harm van Bakel, Judith Aberg, Adolfo Garcia-Sastre, Gunjan Shah, Tobias Hohl, Genovefa Papanicolaou, Miguel-Angel Perales, Kent Sepkowitz, Ngolela Esther Babady, and Mini Kamboj                                                                    |
| EPI_ISL_583468, EPI_ISL_583469, EPI_ISL_583470, EPI_ISL_583472                                                                                 | Memorial Sloan Kettering Cancer Center                                                                        | van Bakel Laboratory, Genetics and Genomics Sciences, Icahn School of Medicine at Mount Sinai                 | Teresa Aydllo, Ana S. Gonzalez-Reiche, Sadaf Aslam, Adriana van de Guchte, Zenab Khan, Ajay Obla, Jayeeta Dutta, Harm van Bakel, Judith Aberg, Adolfo Garcia-Sastre, Gunjan Shah, Tobias Hohl, Genovefa Papanicolaou, Miguel-Angel Perales, Kent Sepkowitz, Ngolela Esther Babady, and Mini Kamboj                                                                    |
| EPI_ISL_583473                                                                                                                                 | Garcia-Sastre Laboratory, Department of Microbiology, Icahn School of Medicine at Mount Sinai                 | van Bakel Laboratory, Genetics and Genomics Sciences, Icahn School of Medicine at Mount Sinai                 | Teresa Aydllo, Ana S. Gonzalez-Reiche, Sadaf Aslam, Adriana van de Guchte, Zenab Khan, Ajay Obla, Jayeeta Dutta, Harm van Bakel, Judith Aberg, Adolfo Garcia-Sastre, Gunjan Shah, Tobias Hohl, Genovefa Papanicolaou, Miguel-Angel Perales, Kent Sepkowitz, Ngolela Esther Babady, and Mini Kamboj                                                                    |
| EPI_ISL_583475, EPI_ISL_583476                                                                                                                 | Memorial Sloan Kettering Cancer Center                                                                        | van Bakel Laboratory, Genetics and Genomics Sciences, Icahn School of Medicine at Mount Sinai                 | Teresa Aydllo, Ana S. Gonzalez-Reiche, Sadaf Aslam, Adriana van de Guchte, Zenab Khan, Ajay Obla, Jayeeta Dutta, Harm van Bakel, Judith Aberg, Adolfo Garcia-Sastre, Gunjan Shah, Tobias Hohl, Genovefa Papanicolaou, Miguel-Angel Perales, Kent Sepkowitz, Ngolela Esther Babady, and Mini Kamboj                                                                    |
| EPI_ISL_583477                                                                                                                                 | Garcia-Sastre Laboratory, Department of Microbiology, Icahn School of Medicine at Mount Sinai                 | van Bakel Laboratory, Genetics and Genomics Sciences, Icahn School of Medicine at Mount Sinai                 | Teresa Aydllo, Ana S. Gonzalez-Reiche, Sadaf Aslam, Adriana van de Guchte, Zenab Khan, Ajay Obla, Jayeeta Dutta, Harm van Bakel, Judith Aberg, Adolfo Garcia-Sastre, Gunjan Shah, Tobias Hohl, Genovefa Papanicolaou, Miguel-Angel Perales, Kent Sepkowitz, Ngolela Esther Babady, and Mini Kamboj                                                                    |
| EPI_ISL_583478, EPI_ISL_583479, EPI_ISL_583480                                                                                                 | Memorial Sloan Kettering Cancer Center                                                                        | van Bakel Laboratory, Genetics and Genomics Sciences, Icahn School of Medicine at Mount Sinai                 | Teresa Aydllo, Ana S. Gonzalez-Reiche, Sadaf Aslam, Adriana van de Guchte, Zenab Khan, Ajay Obla, Jayeeta Dutta, Harm van Bakel, Judith Aberg, Adolfo Garcia-Sastre, Gunjan Shah, Tobias Hohl, Genovefa Papanicolaou, Miguel-Angel Perales, Kent Sepkowitz, Ngolela Esther Babady, and Mini Kamboj                                                                    |
| EPI_ISL_583490                                                                                                                                 | Hospital Estadual Sumare                                                                                      | Instituto Adolfo Lutz, Interdisciplinary Procedures Center, Strategic Laboratory                              | Claudio Tavares Sacchi, Claudia Regina Gonçalves, Erica Vallessa Ramos Gomes, Karoline Rodrigues Campos                                                                                                                                                                                                                                                               |
| EPI_ISL_583491                                                                                                                                 | Centro de Saude Esf IV Zona Rual Domingos de S  Rio Pardo                                                     | Instituto Adolfo Lutz, Interdisciplinary Procedures Center, Strategic Laboratory                              | Claudio Tavares Sacchi, Claudia Regina Gonçalves, Erica Vallessa Ramos Gomes, Karoline Rodrigues Campos                                                                                                                                                                                                                                                               |
| EPI_ISL_583492                                                                                                                                 | Santa Casa Anna Cintra                                                                                        | Instituto Adolfo Lutz, Interdisciplinary Procedures Center, Strategic Laboratory                              | Claudio Tavares Sacchi, Claudia Regina Gonçalves, Erica Vallessa Ramos Gomes, Karoline Rodrigues Campos                                                                                                                                                                                                                                                               |
| EPI_ISL_583493                                                                                                                                 | Vigilância em Saúde de Cajamar                                                                                | Instituto Adolfo Lutz, Interdisciplinary Procedures Center, Strategic Laboratory                              | Claudio Tavares Sacchi, Claudia Regina Gonçalves, Erica Vallessa Ramos Gomes, Karoline Rodrigues Campos                                                                                                                                                                                                                                                               |
| EPI_ISL_583494                                                                                                                                 | CS II Dr. Antonio Vicoso Moreira de Rezende Sumare                                                            | Instituto Adolfo Lutz, Interdisciplinary Procedures Center, Strategic Laboratory                              | Claudio Tavares Sacchi, Claudia Regina Gonçalves, Erica Vallessa Ramos Gomes, Karoline Rodrigues Campos                                                                                                                                                                                                                                                               |
| EPI_ISL_583495                                                                                                                                 | Serviço de Verificação de Óbitos SVO Guarulhos                                                                | Instituto Adolfo Lutz, Interdisciplinary Procedures Center, Strategic Laboratory                              | Claudio Tavares Sacchi, Claudia Regina Gonçalves, Erica Vallessa Ramos Gomes, Karoline Rodrigues Campos                                                                                                                                                                                                                                                               |
| EPI_ISL_583496                                                                                                                                 | UPA Jandira                                                                                                   | Instituto Adolfo Lutz, Interdisciplinary Procedures Center, Strategic Laboratory                              | Claudio Tavares Sacchi, Claudia Regina Gonçalves, Erica Vallessa Ramos Gomes, Karoline Rodrigues Campos                                                                                                                                                                                                                                                               |
| EPI_ISL_583497                                                                                                                                 | Complexo Hospitalar Ouro Verde de Campinas                                                                    | Instituto Adolfo Lutz, Interdisciplinary Procedures Center, Strategic Laboratory                              | Claudio Tavares Sacchi, Claudia Regina Gonçalves, Erica Vallessa Ramos Gomes, Karoline Rodrigues Campos                                                                                                                                                                                                                                                               |
| EPI_ISL_583498                                                                                                                                 | Hospital Municipal Dr. Waldemar Tebaldi                                                                       | Instituto Adolfo Lutz, Interdisciplinary Procedures Center, Strategic Laboratory                              | Claudio Tavares Sacchi, Claudia Regina Gonçalves, Erica Vallessa Ramos Gomes, Karoline Rodrigues Campos                                                                                                                                                                                                                                                               |
| EPI_ISL_583499                                                                                                                                 | Distrito Sanitário Sul Campinas                                                                               | Instituto Adolfo Lutz, Interdisciplinary Procedures Center, Strategic Laboratory                              | Claudio Tavares Sacchi, Claudia Regina Gonçalves, Erica Vallessa Ramos Gomes, Karoline Rodrigues Campos                                                                                                                                                                                                                                                               |
| EPI_ISL_583500                                                                                                                                 | Centro de Saude I Tacito Leite de Carvalho e Silva                                                            | Instituto Adolfo Lutz, Interdisciplinary Procedures Center, Strategic Laboratory                              | Claudio Tavares Sacchi, Claudia Regina Gonçalves, Erica Vallessa Ramos Gomes, Karoline Rodrigues Campos                                                                                                                                                                                                                                                               |
| EPI_ISL_583502                                                                                                                                 | Serv de Vig Sanitária Epidemiom e CTRL de Zoonoses Guarujá                                                    | Instituto Adolfo Lutz, Interdisciplinary Procedures Center, Strategic Laboratory                              | Claudio Tavares Sacchi, Claudia Regina Gonçalves, Erica Vallessa Ramos Gomes, Karoline Rodrigues Campos                                                                                                                                                                                                                                                               |
| EPI_ISL_583503                                                                                                                                 | CTA Centro de Testagem e Aconselhamento                                                                       | Instituto Adolfo Lutz, Interdisciplinary Procedures Center, Strategic Laboratory                              | Claudio Tavares Sacchi, Claudia Regina Gonçalves, Erica Vallessa Ramos Gomes, Karoline Rodrigues Campos                                                                                                                                                                                                                                                               |
| EPI_ISL_583504, EPI_ISL_583505                                                                                                                 | Casa de Saude Stella Maris                                                                                    | Instituto Adolfo Lutz, Interdisciplinary Procedures Center, Strategic Laboratory                              | Claudio Tavares Sacchi, Claudia Regina Gonçalves, Erica Vallessa Ramos Gomes, Karoline Rodrigues Campos                                                                                                                                                                                                                                                               |
| EPI_ISL_583893, EPI_ISL_583894, EPI_ISL_583895, EPI_ISL_583896, EPI_ISL_583897, EPI_ISL_583898, EPI_ISL_583899, EPI_ISL_583900                 | Singapore General Hospital                                                                                    | Department of Microbiology                                                                                    | Nurdyanja Abdul Rahman, Kun Lee Lim, Chenhao Li, Sui Sin Goh, Kenneth Xin Long Chan, Kian Sing Chan, Lynette Oon, Kern Rei Chng, Niranjan Nagarajan, Karrie Ko                                                                                                                                                                                                        |
| EPI_ISL_584048                                                                                                                                 | Laboratory of Molecular Virology, Department of Biomedical, Surgical and Dental Sciences University of Milano | Laboratory of Molecular Virology, Department of Biomedical, Surgical and Dental Sciences University of Milano | Delbue,S., Modenese,A., Bianchi,M., Fattori,M., D'Alessandro,S., Pariani,E., Basilio,N., Galli,C. and Ferrante,P.                                                                                                                                                                                                                                                     |
| EPI_ISL_584049                                                                                                                                 | Laboratory of Molecular Virology, Department of Biomedical, Surgical and Dental Sciences University of Milano | Laboratory of Molecular Virology, Department of Biomedical, Surgical and Dental Sciences University of Milano | Delbue,S., Modenese,A., Bianchi,M., Fattori,M., D'Alessandro,S.,Pariani,E., Basilio,N., Galli,C. and Ferrante,P.                                                                                                                                                                                                                                                      |
| EPI_ISL_584052                                                                                                                                 | Laboratory of Molecular Virology, Department of Biomedical, Surgical and Dental Sciences University of Milano | Laboratory of Molecular Virology, Department of Biomedical, Surgical and Dental Sciences University of Milano | Delbue,S., D'Alessandro,S., Modenese,A., Signorini,L., Parapini,S.,Dolci,M., Binda,S., Primache,V., Taramelli,D., Incorvaia,B. and Ferrante,P.                                                                                                                                                                                                                        |
| EPI_ISL_584069, EPI_ISL_584071, EPI_ISL_584072                                                                                                 | IZSM                                                                                                          | IZSM                                                                                                          | Maurizio Viscardi, Lorena Cardillo, Giovanna Fusco                                                                                                                                                                                                                                                                                                                    |
| EPI_ISL_584073, EPI_ISL_584074, EPI_ISL_584075, EPI_ISL_584076, EPI_ISL_584077, EPI_ISL_584078, EPI_ISL_584079, EPI_ISL_584080, EPI_ISL_584082 | The National Institute of Public Health                                                                       | State Veterinary Institute Prague                                                                             | Nagy,Aj,Írincova,H,Novakova,L,Trmka,D,Vecerova,J                                                                                                                                                                                                                                                                                                                      |
| EPI_ISL_586513                                                                                                                                 | B.J. Medical College and Civil hospital, Ahmedabad                                                            | Gujarat Biotechnology Research Centre                                                                         | Pinal Trivedi, Maharshi Pandya, Nidhi Patel, Nitin Savaliya, Raghawendra Kumar, Dinesh Kumar, Zuber Saiyed, Komal Patel, Labdhi Pandya, Afzal Ansari, Nikha Trivedi, Pranay Shah, Kamlesh J Upadhyay, Sanjay Kapadia, Apurvasinh Puvar, Janvi Ravai, Zarna Patel, Monika Gandhi, R D Dixit, A M Kadri, Harsh Bakshi, Chaitanya Joshi, Madhvi Joshi                    |
| EPI_ISL_586514                                                                                                                                 | B.J. Medical College and Civil hospital, Ahmedabad                                                            | Gujarat Biotechnology Research Centre                                                                         | Maharshi Pandya, Nidhi Patel, Nitin Savaliya, Raghawendra Kumar, Dinesh Kumar, Zuber Saiyed, Komal Patel, Labdhi Pandya, Afzal Ansari, Nikha Trivedi, Pranay Shah, Kamlesh J Upadhyay, Sanjay Kapadia, Apurvasinh Puvar, Janvi Ravai, Zarna Patel, Monika Gandhi, Pinal Trivedi, R D Dixit, A M Kadri, Harsh Bakshi, Chaitanya Joshi, Madhvi Joshi                    |
| EPI_ISL_586515                                                                                                                                 | B.J. Medical College and Civil hospital, Ahmedabad                                                            | Gujarat Biotechnology Research Centre                                                                         | Nidhi Patel, Nitin Savaliya, Raghawendra Kumar, Dinesh Kumar, Zuber Saiyed, Komal Patel, Labdhi Pandya, Afzal Ansari, Nikha Trivedi, Pranay Shah, Kamlesh J Upadhyay, Sanjay Kapadia, Apurvasinh Puvar, Janvi Ravai, Zarna Patel, Monika Gandhi, Pinal Trivedi, Maharshi Pandya, R D Dixit, A M Kadri, Harsh Bakshi, Chaitanya Joshi, Madhvi Joshi                    |
| EPI_ISL_586516                                                                                                                                 | B.J. Medical College and Civil hospital, Ahmedabad                                                            | Gujarat Biotechnology Research Centre                                                                         | Nitin Savaliya, Raghawendra Kumar, Dinesh Kumar, Zuber Saiyed, Komal Patel, Labdhi Pandya, Afzal Ansari, Nikha Trivedi, Pranay Shah, Kamlesh J Upadhyay, Sanjay Kapadia, Apurvasinh Puvar, Janvi Ravai, Zarna Patel, Monika Gandhi, Pinal Trivedi, Maharshi Pandya, Nidhi Patel, R D Dixit, A M Kadri, Harsh Bakshi, Chaitanya Joshi, Madhvi Joshi                    |
| EPI_ISL_586517                                                                                                                                 | B.J. Medical College and Civil hospital, Ahmedabad                                                            | Gujarat Biotechnology Research Centre                                                                         | Raghawendra Kumar, Dinesh Kumar, Zuber Saiyed, Komal Patel, Labdhi Pandya, Afzal Ansari, Nikha Trivedi, Pranay Shah, Kamlesh J Upadhyay, Sanjay Kapadia, Apurvasinh Puvar, Janvi Ravai, Zarna Patel, Monika Gandhi, Pinal Trivedi, Maharshi Pandya, Nidhi Patel, Nitin Savaliya, Raghawendra Kumar, R D Dixit, A M Kadri, Harsh Bakshi, Chaitanya Joshi, Madhvi Joshi |
| EPI_ISL_586518                                                                                                                                 | B.J. Medical College and Civil hospital, Ahmedabad                                                            | Gujarat Biotechnology Research Centre                                                                         | Dinesh Kumar, Zuber Saiyed, Komal Patel, Labdhi Pandya, Afzal Ansari, Nikha Trivedi, Pranay Shah, Kamlesh J Upadhyay, Sanjay Kapadia, Apurvasinh Puvar, Janvi Ravai, Zarna Patel, Monika Gandhi, Pinal Trivedi, Maharshi Pandya, Nidhi Patel, Nitin Savaliya, Raghawendra Kumar, R D Dixit, A M Kadri, Harsh Bakshi, Chaitanya Joshi, Madhvi Joshi                    |
| EPI_ISL_586519                                                                                                                                 | B.J. Medical College and Civil hospital, Ahmedabad                                                            | Gujarat Biotechnology Research Centre                                                                         | Zuber Saiyed, Komal Patel, Labdhi Pandya, Afzal Ansari, Nikha Trivedi, Pranay Shah, Kamlesh J Upadhyay, Sanjay Kapadia, Apurvasinh Puvar, Janvi Ravai, Zarna Patel, Monika Gandhi, Pinal Trivedi, Maharshi Pandya, Nidhi Patel, Nitin Savaliya, Raghawendra Kumar, R D Dixit, A M Kadri, Harsh Bakshi, Chaitanya Joshi, Madhvi Joshi                                  |
| EPI_ISL_586520                                                                                                                                 | B.J. Medical College and Civil hospital, Ahmedabad                                                            | Gujarat Biotechnology Research Centre                                                                         | Komal Patel, Labdhi Pandya, Afzal Ansari, Nikha Trivedi, Pranay Shah, Kamlesh J Upadhyay, Sanjay Kapadia, Apurvasinh Puvar, Janvi Ravai, Zarna Patel, Monika Gandhi, Pinal Trivedi, Maharshi Pandya, Nidhi Patel, Nitin Savaliya, Raghawendra Kumar, Dinesh Kumar, Zuber Saiyed, R D Dixit, A M Kadri, Harsh Bakshi, Chaitanya Joshi, Madhvi Joshi                    |
| EPI_ISL_586521                                                                                                                                 | B.J. Medical College and Civil hospital, Ahmedabad                                                            | Gujarat Biotechnology Research Centre                                                                         | Labdhi Pandya, Afzal Ansari, Nikha Trivedi, Pranay Shah, Kamlesh J Upadhyay, Sanjay Kapadia, Apurvasinh Puvar, Janvi Ravai, Zarna Patel, Monika Gandhi, Pinal Trivedi, Maharshi Pandya, Nidhi Patel, Nitin Savaliya, Raghawendra Kumar, Dinesh Kumar, Zuber Saiyed, Komal Patel, R D Dixit, A M Kadri, Harsh Bakshi, Chaitanya Joshi, Madhvi Joshi                    |
| EPI_ISL_586522                                                                                                                                 | B.J. Medical College and Civil hospital, Ahmedabad                                                            | Gujarat Biotechnology Research Centre                                                                         | Afzal Ansari, Nikha Trivedi, Pranay Shah, Kamlesh J Upadhyay, Sanjay Kapadia, Apurvasinh Puvar, Janvi Ravai, Zarna Patel, Monika Gandhi, Pinal Trivedi, Maharshi Pandya, Nidhi Patel, Nitin Savaliya, Raghawendra Kumar, Dinesh Kumar, Zuber Saiyed, Komal Patel, Labdhi Pandya, R D Dixit, A M Kadri, Harsh Bakshi, Chaitanya Joshi, Madhvi Joshi                    |



|                                                                                                                                                                                                                                                                                                                                                                                                                                                                                                                                                                                                                                                                                                                                                                 |                                                                                                                                                    |                                                                                                                                |                                                                                                                                                                                                                                                                                                                                                                                                                                                                                                                              |
|-----------------------------------------------------------------------------------------------------------------------------------------------------------------------------------------------------------------------------------------------------------------------------------------------------------------------------------------------------------------------------------------------------------------------------------------------------------------------------------------------------------------------------------------------------------------------------------------------------------------------------------------------------------------------------------------------------------------------------------------------------------------|----------------------------------------------------------------------------------------------------------------------------------------------------|--------------------------------------------------------------------------------------------------------------------------------|------------------------------------------------------------------------------------------------------------------------------------------------------------------------------------------------------------------------------------------------------------------------------------------------------------------------------------------------------------------------------------------------------------------------------------------------------------------------------------------------------------------------------|
| EPI_ISL_586569                                                                                                                                                                                                                                                                                                                                                                                                                                                                                                                                                                                                                                                                                                                                                  | GCRI,Ahmedabad                                                                                                                                     | Gujarat Biotechnology Research Centre                                                                                          | Shashank Pandya, Harsha Panchal, Apurvashih Puvar, Janvi Ravai, Zarna Patel, Monika Gandhi, Pinal Trivedi, Maharshi Pandya, Nidhi Patel, Nitin Savaliya, Raghawendra Kumar, Dinesh Kumar, Zuber Saiyed, Komal Patel, Labdhi Pandya, Afzal Ansari, Nikha Trivedi, R D Dixit, A M Kadri, Harsh Bakshi, Chaitanya Joshi, Madhvi Joshi                                                                                                                                                                                           |
| EPI_ISL_586570                                                                                                                                                                                                                                                                                                                                                                                                                                                                                                                                                                                                                                                                                                                                                  | GCRI,Ahmedabad                                                                                                                                     | Gujarat Biotechnology Research Centre                                                                                          | Harsha Panchal, Apurvashih Puvar, Janvi Ravai, Zarna Patel, Monika Gandhi, Pinal Trivedi, Maharshi Pandya, Nidhi Patel, Nitin Savaliya, Raghawendra Kumar, Dinesh Kumar, Zuber Saiyed, Komal Patel, Labdhi Pandya, Afzal Ansari, Nikha Trivedi, Shashank Pandya, R D Dixit, A M Kadri, Harsh Bakshi, Chaitanya Joshi, Madhvi Joshi                                                                                                                                                                                           |
| EPI_ISL_590693                                                                                                                                                                                                                                                                                                                                                                                                                                                                                                                                                                                                                                                                                                                                                  | INMI Lazzaro Spallanzani IRCCS                                                                                                                     | INMI Lazzaro Spallanzani IRCCS                                                                                                 | Martina Rueca, Barbara Bartolini, Cesare E.M. Gruber, Francesco Messina, Emanuela Giombini, Beatrice Valli, Eleonora Lalle, Simone Lanini, Francesco Vairo, Maria R. Capobianchi, Antonino Di Caro                                                                                                                                                                                                                                                                                                                           |
| EPI_ISL_590694                                                                                                                                                                                                                                                                                                                                                                                                                                                                                                                                                                                                                                                                                                                                                  | INMI Lazzaro Spallanzani IRCCS                                                                                                                     | INMI Lazzaro Spallanzani IRCCS                                                                                                 | Barbara Bartolini, Martina Rueca, Francesco Messina, Cesare E.M. Gruber, Emanuela Giombini, Beatrice Valli, Eleonora Lalle, Simone Lanini, Francesco Vairo, Maria R. Capobianchi, Antonino Di Caro                                                                                                                                                                                                                                                                                                                           |
| EPI_ISL_590695                                                                                                                                                                                                                                                                                                                                                                                                                                                                                                                                                                                                                                                                                                                                                  | INMI Lazzaro Spallanzani IRCCS                                                                                                                     | INMI Lazzaro Spallanzani IRCCS                                                                                                 | Cesare E.M. Gruber, Francesco Messina, Barbara Bartolini, Martina Rueca, Emanuela Giombini, Beatrice Valli, Eleonora Lalle, Simone Lanini, Francesco Vairo, Antonino Di Caro, Maria R. Capobianchi                                                                                                                                                                                                                                                                                                                           |
| EPI_ISL_590696                                                                                                                                                                                                                                                                                                                                                                                                                                                                                                                                                                                                                                                                                                                                                  | INMI Lazzaro Spallanzani IRCCS                                                                                                                     | INMI Lazzaro Spallanzani IRCCS                                                                                                 | Cesare E.M. Gruber, Barbara Bartolini, Francesco Messina, Martina Rueca, Emanuela Giombini, Beatrice Valli, Eleonora Lalle, Simone Lanini, Francesco Vairo, Antonino Di Caro, Maria R. Capobianchi                                                                                                                                                                                                                                                                                                                           |
| EPI_ISL_590697                                                                                                                                                                                                                                                                                                                                                                                                                                                                                                                                                                                                                                                                                                                                                  | INMI Lazzaro Spallanzani IRCCS                                                                                                                     | INMI Lazzaro Spallanzani IRCCS                                                                                                 | Martina Rueca, Cesare E.M. Gruber, Barbara Bartolini, Francesco Messina, Emanuela Giombini, Beatrice Valli, Eleonora Lalle, Simone Lanini, Francesco Vairo, Antonino Di Caro, Maria R. Capobianchi                                                                                                                                                                                                                                                                                                                           |
| EPI_ISL_590698                                                                                                                                                                                                                                                                                                                                                                                                                                                                                                                                                                                                                                                                                                                                                  | INMI Lazzaro Spallanzani IRCCS                                                                                                                     | INMI Lazzaro Spallanzani IRCCS                                                                                                 | Barbara Bartolini, Francesco Messina, Cesare E.M. Gruber, Martina Rueca, Emanuela Giombini, Beatrice Valli, Eleonora Lalle, Simone Lanini, Francesco Vairo, Maria R. Capobianchi, Antonino Di Caro                                                                                                                                                                                                                                                                                                                           |
| EPI_ISL_591272, EPI_ISL_591273, EPI_ISL_591274, EPI_ISL_591275, EPI_ISL_591276, EPI_ISL_591277, EPI_ISL_591278, EPI_ISL_591279, EPI_ISL_591280                                                                                                                                                                                                                                                                                                                                                                                                                                                                                                                                                                                                                  | National Institute for Viral Disease Control and Prevention, China CDC                                                                             | National Institute for Viral Disease Control and Prevention, China CDC                                                         | Huilai Ma, Zhaoguo Wang, Xiang Zhao, Jun Han, Yong Zhang, Hong Wang, Cao Chen, Ji Wang, Jingdong Song, Yao Meng, Yuchao Wu, Zhixiao Chen, Dayan Wang, Ruqin Gao, George F.Gao, Wenbo Xu                                                                                                                                                                                                                                                                                                                                      |
| EPI_ISL_591471, EPI_ISL_591472, EPI_ISL_591473, EPI_ISL_591474, EPI_ISL_591475, EPI_ISL_591476, EPI_ISL_591477, EPI_ISL_591478, EPI_ISL_591479, EPI_ISL_591480, EPI_ISL_591481, EPI_ISL_591482, EPI_ISL_591483                                                                                                                                                                                                                                                                                                                                                                                                                                                                                                                                                  | see above                                                                                                                                          | Pathogen Genomics Center, National Institute of Infectious Diseases                                                            | Tsuyoshi Sekizuka, Kentaro Itokawa, Rina Tanaka, Masanori Hashino, Hajime Kamiya, Tomoe Shimada, Makoto Kuroda                                                                                                                                                                                                                                                                                                                                                                                                               |
| EPI_ISL_593478, EPI_ISL_593479, EPI_ISL_593480, EPI_ISL_593553, EPI_ISL_593556                                                                                                                                                                                                                                                                                                                                                                                                                                                                                                                                                                                                                                                                                  | Brigham and Women's Hospital                                                                                                                       | Jonathan Li Laboratory                                                                                                         | Manish C. Choudhary, James Regan, Jonathan S. Li                                                                                                                                                                                                                                                                                                                                                                                                                                                                             |
| EPI_ISL_593596                                                                                                                                                                                                                                                                                                                                                                                                                                                                                                                                                                                                                                                                                                                                                  | Swedish Medical Center, Seattle, WA, USA                                                                                                           | Institute for Systems Biology                                                                                                  | Jason D. Goldman, Kai Wang, Katharina Röltgen, Sandra C. A. Nielsen, Jared C. Roach, Samia N. Naccache, Fan Yang, Oliver F. Wirz, Kathryn E. Yost, Ji-Yeun Lee, Kelly Chun, Terri Wrin, Christos J. Petropoulos, Inyoul Lee, Shannon Fallen, Paula M. Manner, Julie A. Wallick, Heather A. Algren, RN, Kim M. Murray, Yapeng Su, Jennifer Hadlock, Joshua Jeharahaj, William R. Berrington, George P. Pappas, Sonam T. Nyatsatsang, Alexander L. Greninger, Ansuman T. Satpathy, John S. Pauk, Scott D. Boyd, James R. Heath |
| EPI_ISL_593902                                                                                                                                                                                                                                                                                                                                                                                                                                                                                                                                                                                                                                                                                                                                                  | Sentinelles, Limay                                                                                                                                 | National Reference Center for Viruses of Respiratory Infections, Institut Pasteur, Paris                                       | Sylvie Behillil, Fabiana Gambaro, Etienne Simon-Lorière, Vincent Enouf, Maud Vanpeene, Sylvie van der Werf                                                                                                                                                                                                                                                                                                                                                                                                                   |
| EPI_ISL_593903                                                                                                                                                                                                                                                                                                                                                                                                                                                                                                                                                                                                                                                                                                                                                  | Hospital, Argenteuil                                                                                                                               | National Reference Center for Viruses of Respiratory Infections, Institut Pasteur, Paris                                       | Sylvie Behillil, Fabiana Gambaro, Etienne Simon-Lorière, Vincent Enouf, Maud Vanpeene, Sylvie van der Werf                                                                                                                                                                                                                                                                                                                                                                                                                   |
| EPI_ISL_593904, EPI_ISL_593905, EPI_ISL_593906, EPI_ISL_593907, EPI_ISL_593908, EPI_ISL_593909                                                                                                                                                                                                                                                                                                                                                                                                                                                                                                                                                                                                                                                                  | Labo Analyses Med, Sarcelles                                                                                                                       | National Reference Center for Viruses of Respiratory Infections, Institut Pasteur, Paris                                       | Sylvie Behillil, Fabiana Gambaro, Etienne Simon-Lorière, Vincent Enouf, Maud Vanpeene, Sylvie van der Werf                                                                                                                                                                                                                                                                                                                                                                                                                   |
| EPI_ISL_593910                                                                                                                                                                                                                                                                                                                                                                                                                                                                                                                                                                                                                                                                                                                                                  | Hospital, Boulogne-Billancourt                                                                                                                     | National Reference Center for Viruses of Respiratory Infections, Institut Pasteur, Paris                                       | Sylvie Behillil, Fabiana Gambaro, Etienne Simon-Lorière, Vincent Enouf, Maud Vanpeene, Sylvie van der Werf                                                                                                                                                                                                                                                                                                                                                                                                                   |
| EPI_ISL_593911                                                                                                                                                                                                                                                                                                                                                                                                                                                                                                                                                                                                                                                                                                                                                  | Hospital, Le Chesnay Cédex                                                                                                                         | National Reference Center for Viruses of Respiratory Infections, Institut Pasteur, Paris                                       | Sylvie Behillil, Fabiana Gambaro, Etienne Simon-Lorière, Vincent Enouf, Maud Vanpeene, Sylvie van der Werf                                                                                                                                                                                                                                                                                                                                                                                                                   |
| EPI_ISL_593912                                                                                                                                                                                                                                                                                                                                                                                                                                                                                                                                                                                                                                                                                                                                                  | Hospital, Marange Silvanage                                                                                                                        | National Reference Center for Viruses of Respiratory Infections, Institut Pasteur, Paris                                       | Sylvie Behillil, Fabiana Gambaro, Etienne Simon-Lorière, Vincent Enouf, Maud Vanpeene, Sylvie van der Werf                                                                                                                                                                                                                                                                                                                                                                                                                   |
| EPI_ISL_593913                                                                                                                                                                                                                                                                                                                                                                                                                                                                                                                                                                                                                                                                                                                                                  | Hospital, Talange                                                                                                                                  | National Reference Center for Viruses of Respiratory Infections, Institut Pasteur, Paris                                       | Sylvie Behillil, Fabiana Gambaro, Etienne Simon-Lorière, Vincent Enouf, Maud Vanpeene, Sylvie van der Werf                                                                                                                                                                                                                                                                                                                                                                                                                   |
| EPI_ISL_593914                                                                                                                                                                                                                                                                                                                                                                                                                                                                                                                                                                                                                                                                                                                                                  | Hospital, Metz                                                                                                                                     | National Reference Center for Viruses of Respiratory Infections, Institut Pasteur, Paris                                       | Sylvie Behillil, Fabiana Gambaro, Etienne Simon-Lorière, Vincent Enouf, Maud Vanpeene, Sylvie van der Werf                                                                                                                                                                                                                                                                                                                                                                                                                   |
| EPI_ISL_593915                                                                                                                                                                                                                                                                                                                                                                                                                                                                                                                                                                                                                                                                                                                                                  | Hospital, Amneville                                                                                                                                | National Reference Center for Viruses of Respiratory Infections, Institut Pasteur, Paris                                       | Sylvie Behillil, Fabiana Gambaro, Etienne Simon-Lorière, Vincent Enouf, Maud Vanpeene, Sylvie van der Werf                                                                                                                                                                                                                                                                                                                                                                                                                   |
| EPI_ISL_593916                                                                                                                                                                                                                                                                                                                                                                                                                                                                                                                                                                                                                                                                                                                                                  | Hospital, Sarreguemines                                                                                                                            | National Reference Center for Viruses of Respiratory Infections, Institut Pasteur, Paris                                       | Sylvie Behillil, Fabiana Gambaro, Etienne Simon-Lorière, Vincent Enouf, Maud Vanpeene, Sylvie van der Werf                                                                                                                                                                                                                                                                                                                                                                                                                   |
| EPI_ISL_593917                                                                                                                                                                                                                                                                                                                                                                                                                                                                                                                                                                                                                                                                                                                                                  | Hospital, Montigny les Metz                                                                                                                        | National Reference Center for Viruses of Respiratory Infections, Institut Pasteur, Paris                                       | Sylvie Behillil, Fabiana Gambaro, Etienne Simon-Lorière, Vincent Enouf, Maud Vanpeene, Sylvie van der Werf                                                                                                                                                                                                                                                                                                                                                                                                                   |
| EPI_ISL_593918                                                                                                                                                                                                                                                                                                                                                                                                                                                                                                                                                                                                                                                                                                                                                  | Hospital, Joeuf                                                                                                                                    | National Reference Center for Viruses of Respiratory Infections, Institut Pasteur, Paris                                       | Sylvie Behillil, Fabiana Gambaro, Etienne Simon-Lorière, Vincent Enouf, Maud Vanpeene, Sylvie van der Werf                                                                                                                                                                                                                                                                                                                                                                                                                   |
| EPI_ISL_593919                                                                                                                                                                                                                                                                                                                                                                                                                                                                                                                                                                                                                                                                                                                                                  | Hospital, Ottonville                                                                                                                               | National Reference Center for Viruses of Respiratory Infections, Institut Pasteur, Paris                                       | Sylvie Behillil, Fabiana Gambaro, Etienne Simon-Lorière, Vincent Enouf, Maud Vanpeene, Sylvie van der Werf                                                                                                                                                                                                                                                                                                                                                                                                                   |
| EPI_ISL_593920                                                                                                                                                                                                                                                                                                                                                                                                                                                                                                                                                                                                                                                                                                                                                  | Hospital, Metz                                                                                                                                     | National Reference Center for Viruses of Respiratory Infections, Institut Pasteur, Paris                                       | Sylvie Behillil, Fabiana Gambaro, Etienne Simon-Lorière, Vincent Enouf, Maud Vanpeene, Sylvie van der Werf                                                                                                                                                                                                                                                                                                                                                                                                                   |
| EPI_ISL_593921                                                                                                                                                                                                                                                                                                                                                                                                                                                                                                                                                                                                                                                                                                                                                  | Hospital, Fameck                                                                                                                                   | National Reference Center for Viruses of Respiratory Infections, Institut Pasteur, Paris                                       | Sylvie Behillil, Fabiana Gambaro, Etienne Simon-Lorière, Vincent Enouf, Maud Vanpeene, Sylvie van der Werf                                                                                                                                                                                                                                                                                                                                                                                                                   |
| EPI_ISL_593922, EPI_ISL_593923                                                                                                                                                                                                                                                                                                                                                                                                                                                                                                                                                                                                                                                                                                                                  | Hospital, Maizières les Metz                                                                                                                       | National Reference Center for Viruses of Respiratory Infections, Institut Pasteur, Paris                                       | Sylvie Behillil, Fabiana Gambaro, Etienne Simon-Lorière, Vincent Enouf, Maud Vanpeene, Sylvie van der Werf                                                                                                                                                                                                                                                                                                                                                                                                                   |
| EPI_ISL_593924, EPI_ISL_593925, EPI_ISL_593926, EPI_ISL_593927, EPI_ISL_593928, EPI_ISL_593929, EPI_ISL_593932, EPI_ISL_593933                                                                                                                                                                                                                                                                                                                                                                                                                                                                                                                                                                                                                                  | Labo Analyses Med, Puteaux                                                                                                                         | National Reference Center for Viruses of Respiratory Infections, Institut Pasteur, Paris                                       | Sylvie Behillil, Fabiana Gambaro, Etienne Simon-Lorière, Vincent Enouf, Maud Vanpeene, Sylvie van der Werf                                                                                                                                                                                                                                                                                                                                                                                                                   |
| EPI_ISL_593934                                                                                                                                                                                                                                                                                                                                                                                                                                                                                                                                                                                                                                                                                                                                                  | Sentinelles, Chanteloup-En-Brie                                                                                                                    | National Reference Center for Viruses of Respiratory Infections, Institut Pasteur, Paris                                       | Sylvie Behillil, Fabiana Gambaro, Etienne Simon-Lorière, Vincent Enouf, Maud Vanpeene, Sylvie van der Werf                                                                                                                                                                                                                                                                                                                                                                                                                   |
| EPI_ISL_593935                                                                                                                                                                                                                                                                                                                                                                                                                                                                                                                                                                                                                                                                                                                                                  | Sentinelles, Plessis-Trevisé                                                                                                                       | National Reference Center for Viruses of Respiratory Infections, Institut Pasteur, Paris                                       | Sylvie Behillil, Fabiana Gambaro, Etienne Simon-Lorière, Vincent Enouf, Maud Vanpeene, Sylvie van der Werf                                                                                                                                                                                                                                                                                                                                                                                                                   |
| EPI_ISL_593936                                                                                                                                                                                                                                                                                                                                                                                                                                                                                                                                                                                                                                                                                                                                                  | Sentinelles, Fontdettes                                                                                                                            | National Reference Center for Viruses of Respiratory Infections, Institut Pasteur, Paris                                       | Sylvie Behillil, Fabiana Gambaro, Etienne Simon-Lorière, Vincent Enouf, Maud Vanpeene, Sylvie van der Werf                                                                                                                                                                                                                                                                                                                                                                                                                   |
| EPI_ISL_594118                                                                                                                                                                                                                                                                                                                                                                                                                                                                                                                                                                                                                                                                                                                                                  | Centro de Investigaciones, Universidad de Especialidades Espíritu Santo                                                                            | Institute of Microbiology, Universidad San Francisco de Quito                                                                  | Derly Andrade, Juan Carlos Fernandez, Belén Prado-Vivar, Sully Márquez, Juan José Guadalupe, Monica Becerra-Wong, Bernardo Gutiérrez, Gabriel Morey, Ruben Armas, José Pedro Barberan, Fernando Espinoza, Edith Lopez, Verónica Barragán, Patricio Rojas-Silva, Gabriel Trueba, Michelle Grunauer, Paúl Cárdenas                                                                                                                                                                                                             |
| EPI_ISL_594185, EPI_ISL_594186, EPI_ISL_594187, EPI_ISL_594188                                                                                                                                                                                                                                                                                                                                                                                                                                                                                                                                                                                                                                                                                                  | Department of Pathology, School of Medicine, Imam Khomeini Hospital, Tehran University of Medical Sciences                                         | Genetics Research Center, University of Social Welfare and Rehabilitation Sciences                                             | Zohreh Fattahi, Marzieh Mohseni, Khadijeh Jalalvand, Azam Ghaziasadi, Seyedeh elham Mortazavi, Ali Jafarpour, Azar Hadadi, Alireza Abdollahi, Ali Jafarpour, Azam Ghaziasad, Seyedeh elham Mortazavi, Saber Soltani, Reza Najafpour, Kimia Kahrizi, Seyed Mohammad Jazayeri, Hossein Najmabadi                                                                                                                                                                                                                               |
| EPI_ISL_596228, EPI_ISL_596233, EPI_ISL_596234                                                                                                                                                                                                                                                                                                                                                                                                                                                                                                                                                                                                                                                                                                                  | WHO National Influenza Centre Russian Federation                                                                                                   | WHO National Influenza Centre Russian Federation                                                                               | Andrey Komissarov, Artem Fadeev, Anna Ivanova, Kseniya Komissarova, Dmitry Bazhenov, Daria Danilenko                                                                                                                                                                                                                                                                                                                                                                                                                         |
| EPI_ISL_596264, EPI_ISL_596265                                                                                                                                                                                                                                                                                                                                                                                                                                                                                                                                                                                                                                                                                                                                  | WHO National Influenza Centre Russian Federation                                                                                                   | WHO National Influenza Centre Russian Federation                                                                               | Andrey Komissarov, Artem Fadeev, Anna Ivanova, Maria Sergeeva, Kseniya Komissarova, Dmitry Bazhenov, Daria Danilenko                                                                                                                                                                                                                                                                                                                                                                                                         |
| EPI_ISL_596266, EPI_ISL_596267                                                                                                                                                                                                                                                                                                                                                                                                                                                                                                                                                                                                                                                                                                                                  | WHO National Influenza Centre Russian Federation                                                                                                   | WHO National Influenza Centre Russian Federation                                                                               | Andrey Komissarov, Artem Fadeev, Anna Ivanova, Kseniya Komissarova, Dmitry Bazhenov, Daria Danilenko                                                                                                                                                                                                                                                                                                                                                                                                                         |
| EPI_ISL_596449                                                                                                                                                                                                                                                                                                                                                                                                                                                                                                                                                                                                                                                                                                                                                  | Institute for Medical Research, Infectious Disease Research Centre, National Institutes of Health, Ministry of Health Malaysia                     | Institute for Medical Research, Infectious Disease Research Centre, National Institutes of Health, Ministry of Health Malaysia | Suppiah J, Kamel K, Mohd-Zawawi Z, Thayan R                                                                                                                                                                                                                                                                                                                                                                                                                                                                                  |
| EPI_ISL_596451                                                                                                                                                                                                                                                                                                                                                                                                                                                                                                                                                                                                                                                                                                                                                  | Department of Pathology, School of Medicine, Imam Khomeini Hospital, Tehran University of Medical Sciences                                         | Genetics Research Center, University of Social Welfare and Rehabilitation Sciences                                             | Zohreh Fattahi, Marzieh Mohseni, Khadijeh Jalalvand, Azam Ghaziasadi, Seyedeh elham Mortazavi, Ali Jafarpour, Azar Hadadi, Alireza Abdollahi, Ali Jafarpour, Azam Ghaziasad, Seyedeh elham Mortazavi, Saber Soltani, Reza Najafpour, Kimia Kahrizi, Seyed Mohammad Jazayeri, Hossein Najmabadi                                                                                                                                                                                                                               |
| EPI_ISL_596453                                                                                                                                                                                                                                                                                                                                                                                                                                                                                                                                                                                                                                                                                                                                                  | Booali laboratory, Qom, Iran, Department of Virology, School of Public Health, Tehran University of Medical Sciences, Tehran, Iran.                | Genetics Research Center, University of Social Welfare and Rehabilitation Sciences                                             | Zohreh Fattahi, Marzieh Mohseni, Khadijeh Jalalvand, Azam Ghaziasadi, Seyedeh elham Mortazavi, Ali Jafarpour, Mohammad Khazeni, Seyed Amir Momeni, Kimia Kahrizi, Seyed Mohammad Jazayeri, Hossein Najmabadi                                                                                                                                                                                                                                                                                                                 |
| EPI_ISL_596454                                                                                                                                                                                                                                                                                                                                                                                                                                                                                                                                                                                                                                                                                                                                                  | Infectious Disease and Tropical Medicine Research Center, Resistant Tuberculosis Institute, Zahedan University of Medical Sciences, Zahedan, Iran. | Genetics Research Center, University of Social Welfare and Rehabilitation Sciences                                             | Zohreh Fattahi, Marzieh Mohseni, Khadijeh Jalalvand, Azam Ghaziasadi, Seyedeh elham Mortazavi, Ali Jafarpour, Ebrahim Kord, Seyed Mohammad Hashemi-Shahri, Kimia Kahrizi, Seyed Mohammad Jazayeri, Hossein Najmabadi                                                                                                                                                                                                                                                                                                         |
| EPI_ISL_596455                                                                                                                                                                                                                                                                                                                                                                                                                                                                                                                                                                                                                                                                                                                                                  | Department of Pathology, School of Medicine, Imam Khomeini Hospital, Tehran University of Medical Sciences                                         | Genetics Research Center, University of Social Welfare and Rehabilitation Sciences                                             | Zohreh Fattahi, Marzieh Mohseni, Khadijeh Jalalvand, Azam Ghaziasadi, Seyedeh elham Mortazavi, Ali Jafarpour, Azar Hadadi, Alireza Abdollahi, Ali Jafarpour, Azam Ghaziasad, Seyedeh elham Mortazavi, Saber Soltani, Reza Najafpour, Kimia Kahrizi, Seyed Mohammad Jazayeri, Hossein Najmabadi                                                                                                                                                                                                                               |
| EPI_ISL_602304                                                                                                                                                                                                                                                                                                                                                                                                                                                                                                                                                                                                                                                                                                                                                  | Istituto Zooprofilattico Sperimentale del Mezzogiorno                                                                                              | U.O. Diagnostica Virologica Dip. Sanità Animale IZSM                                                                           | Maurizio Viscardi, Lorena Cardillo , e Giovanna Fusco                                                                                                                                                                                                                                                                                                                                                                                                                                                                        |
| EPI_ISL_602412, EPI_ISL_602413, EPI_ISL_602414, EPI_ISL_602415, EPI_ISL_602416                                                                                                                                                                                                                                                                                                                                                                                                                                                                                                                                                                                                                                                                                  | WHO National Influenza Centre Russian Federation                                                                                                   | WHO National Influenza Centre Russian Federation                                                                               | Andrey Komissarov, Artem Fadeev, Kseniya Komissarova, Anna Ivanova, Dmitry Bazhenov, Daria Danilenko                                                                                                                                                                                                                                                                                                                                                                                                                         |
| EPI_ISL_602564                                                                                                                                                                                                                                                                                                                                                                                                                                                                                                                                                                                                                                                                                                                                                  | Centre for Dengue Research, Department of Immunology and Molecular Medicine                                                                        | Centre for Dengue Research                                                                                                     | Chandima Jeewandara, Deshni Jayathilaka, Dinuka Ariyaratne, Diyanath Ranasinghe, Laksiri Gomes, Ananda Wijewickrama, Malika Karunaratne, Gathsaurie Neelika Malavige                                                                                                                                                                                                                                                                                                                                                         |
| EPI_ISL_602622                                                                                                                                                                                                                                                                                                                                                                                                                                                                                                                                                                                                                                                                                                                                                  | AHRI-Sigal                                                                                                                                         | KRISP, KZN Research Innovation and Sequencing Platform                                                                         | Gazy I, Sigla, Karim F, Cele S, Giandhari J, Pillay S, Tegally H, Wilkinson E, de Oliveira T                                                                                                                                                                                                                                                                                                                                                                                                                                 |
| EPI_ISL_602624, EPI_ISL_602625, EPI_ISL_602626, EPI_ISL_602627, EPI_ISL_602628, EPI_ISL_602629, EPI_ISL_602630                                                                                                                                                                                                                                                                                                                                                                                                                                                                                                                                                                                                                                                  | AHRI-Sigal                                                                                                                                         | KRISP, KZN Research Innovation and Sequencing Platform                                                                         | Gazy I, Sigl A, Karim F, Cele S, Giandhari J, Pillay S, Tegally H, Wilkinson E, de Oliveira T                                                                                                                                                                                                                                                                                                                                                                                                                                |
| EPI_ISL_602632, EPI_ISL_602633, EPI_ISL_602634, EPI_ISL_602635, EPI_ISL_602636, EPI_ISL_602637, EPI_ISL_602638, EPI_ISL_602639, EPI_ISL_602640, EPI_ISL_602641, EPI_ISL_602642, EPI_ISL_602644, EPI_ISL_602645, EPI_ISL_602646, EPI_ISL_602647, EPI_ISL_602648, EPI_ISL_602649, EPI_ISL_602650, EPI_ISL_602651, EPI_ISL_602652, EPI_ISL_602653, EPI_ISL_602654, EPI_ISL_602656, EPI_ISL_602657, EPI_ISL_602658, EPI_ISL_602659, EPI_ISL_602660, EPI_ISL_602661, EPI_ISL_602662, EPI_ISL_602663, EPI_ISL_602665, EPI_ISL_602666, EPI_ISL_602667, EPI_ISL_602668, EPI_ISL_602669, EPI_ISL_602670, EPI_ISL_602671, EPI_ISL_602672, EPI_ISL_602673, EPI_ISL_602674, EPI_ISL_602675, EPI_ISL_602676, EPI_ISL_602678, EPI_ISL_602679, EPI_ISL_602680, EPI_ISL_602681, |                                                                                                                                                    |                                                                                                                                |                                                                                                                                                                                                                                                                                                                                                                                                                                                                                                                              |







|                                                                                |                                                                                                                                                                       |                                                                                                                                                                                                                                                                                                                                                                          |                                                                                                                                                                                                                                                              |
|--------------------------------------------------------------------------------|-----------------------------------------------------------------------------------------------------------------------------------------------------------------------|--------------------------------------------------------------------------------------------------------------------------------------------------------------------------------------------------------------------------------------------------------------------------------------------------------------------------------------------------------------------------|--------------------------------------------------------------------------------------------------------------------------------------------------------------------------------------------------------------------------------------------------------------|
| EPI_ISL_631558                                                                 | NYU Langone Health                                                                                                                                                    | New York City Public Health Laboratory                                                                                                                                                                                                                                                                                                                                   | Jade Wang, et al.                                                                                                                                                                                                                                            |
| EPI_ISL_631561                                                                 | Montefiore Medical Center                                                                                                                                             | New York City Public Health Laboratory                                                                                                                                                                                                                                                                                                                                   | Jade Wang, et al.                                                                                                                                                                                                                                            |
| EPI_ISL_631562                                                                 | Brookdale University Hospital Medical Center                                                                                                                          | New York City Public Health Laboratory                                                                                                                                                                                                                                                                                                                                   | Jade Wang, et al.                                                                                                                                                                                                                                            |
| EPI_ISL_631568                                                                 | New York Presbyterian Queens                                                                                                                                          | New York City Public Health Laboratory                                                                                                                                                                                                                                                                                                                                   | Jade Wang, et al.                                                                                                                                                                                                                                            |
| EPI_ISL_631570                                                                 | OCME Office Of Chief Medical Examiner                                                                                                                                 | New York City Public Health Laboratory                                                                                                                                                                                                                                                                                                                                   | Jade Wang, et al.                                                                                                                                                                                                                                            |
| EPI_ISL_631573                                                                 | Brookdale University Hospital Medical Center                                                                                                                          | New York City Public Health Laboratory                                                                                                                                                                                                                                                                                                                                   | Jade Wang, et al.                                                                                                                                                                                                                                            |
| EPI_ISL_631574                                                                 | Jamaica Hospital Medical Center                                                                                                                                       | New York City Public Health Laboratory                                                                                                                                                                                                                                                                                                                                   | Jade Wang, et al.                                                                                                                                                                                                                                            |
| EPI_ISL_631577, EPI_ISL_631584, EPI_ISL_631587                                 | NYC HH Lincoln Medical And Mental Health Center                                                                                                                       | New York City Public Health Laboratory                                                                                                                                                                                                                                                                                                                                   | Jade Wang, et al.                                                                                                                                                                                                                                            |
| EPI_ISL_631591                                                                 | OCME Office Of Chief Medical Examiner                                                                                                                                 | New York City Public Health Laboratory                                                                                                                                                                                                                                                                                                                                   | Jade Wang, et al.                                                                                                                                                                                                                                            |
| EPI_ISL_631593                                                                 | Jamaica Hospital Medical Center                                                                                                                                       | New York City Public Health Laboratory                                                                                                                                                                                                                                                                                                                                   | Jade Wang, et al.                                                                                                                                                                                                                                            |
| EPI_ISL_631594                                                                 | OCME Office Of Chief Medical Examiner                                                                                                                                 | New York City Public Health Laboratory                                                                                                                                                                                                                                                                                                                                   | Jade Wang, et al.                                                                                                                                                                                                                                            |
| EPI_ISL_631595                                                                 | Jamaica Hospital Medical Center                                                                                                                                       | New York City Public Health Laboratory                                                                                                                                                                                                                                                                                                                                   | Jade Wang, et al.                                                                                                                                                                                                                                            |
| EPI_ISL_631596                                                                 | James J. Peters VA Medical Center                                                                                                                                     | New York City Public Health Laboratory                                                                                                                                                                                                                                                                                                                                   | Jade Wang, et al.                                                                                                                                                                                                                                            |
| EPI_ISL_631597                                                                 | Jamaica Hospital Medical Center                                                                                                                                       | New York City Public Health Laboratory                                                                                                                                                                                                                                                                                                                                   | Jade Wang, et al.                                                                                                                                                                                                                                            |
| EPI_ISL_631598                                                                 | OCME Office Of Chief Medical Examiner                                                                                                                                 | New York City Public Health Laboratory                                                                                                                                                                                                                                                                                                                                   | Jade Wang, et al.                                                                                                                                                                                                                                            |
| EPI_ISL_631602                                                                 | Flushing Hospital Medical Center                                                                                                                                      | New York City Public Health Laboratory                                                                                                                                                                                                                                                                                                                                   | Jade Wang, et al.                                                                                                                                                                                                                                            |
| EPI_ISL_631603                                                                 | NYC HH Lincoln Medical And Mental Health Center                                                                                                                       | New York City Public Health Laboratory                                                                                                                                                                                                                                                                                                                                   | Jade Wang, et al.                                                                                                                                                                                                                                            |
| EPI_ISL_631605                                                                 | OCME Office Of Chief Medical Examiner                                                                                                                                 | New York City Public Health Laboratory                                                                                                                                                                                                                                                                                                                                   | Jade Wang, et al.                                                                                                                                                                                                                                            |
| EPI_ISL_631606                                                                 | Flushing Hospital Medical Center                                                                                                                                      | New York City Public Health Laboratory                                                                                                                                                                                                                                                                                                                                   | Jade Wang, et al.                                                                                                                                                                                                                                            |
| EPI_ISL_631607                                                                 | NYC HH Lincoln Medical And Mental Health Center                                                                                                                       | New York City Public Health Laboratory                                                                                                                                                                                                                                                                                                                                   | Jade Wang, et al.                                                                                                                                                                                                                                            |
| EPI_ISL_631610, EPI_ISL_631613, EPI_ISL_631615                                 | Jamaica Hospital Medical Center                                                                                                                                       | New York City Public Health Laboratory                                                                                                                                                                                                                                                                                                                                   | Jade Wang, et al.                                                                                                                                                                                                                                            |
| EPI_ISL_631616                                                                 | Flushing Hospital Medical Center                                                                                                                                      | New York City Public Health Laboratory                                                                                                                                                                                                                                                                                                                                   | Jade Wang, et al.                                                                                                                                                                                                                                            |
| EPI_ISL_631617, EPI_ISL_631618, EPI_ISL_631619                                 | OCME Office Of Chief Medical Examiner                                                                                                                                 | New York City Public Health Laboratory                                                                                                                                                                                                                                                                                                                                   | Jade Wang, et al.                                                                                                                                                                                                                                            |
| EPI_ISL_631624, EPI_ISL_631625, EPI_ISL_631628, EPI_ISL_631629, EPI_ISL_631633 | Richmond University Medical Center                                                                                                                                    | New York City Public Health Laboratory                                                                                                                                                                                                                                                                                                                                   | Jade Wang, et al.                                                                                                                                                                                                                                            |
| EPI_ISL_631637                                                                 | Jamaica Hospital Medical Center                                                                                                                                       | New York City Public Health Laboratory                                                                                                                                                                                                                                                                                                                                   | Jade Wang, et al.                                                                                                                                                                                                                                            |
| EPI_ISL_631686                                                                 | NYC HH Lincoln Medical And Mental Health Center                                                                                                                       | New York City Public Health Laboratory                                                                                                                                                                                                                                                                                                                                   | Jade Wang, et al.                                                                                                                                                                                                                                            |
| EPI_ISL_631687                                                                 | OCME Office Of Chief Medical Examiner                                                                                                                                 | New York City Public Health Laboratory                                                                                                                                                                                                                                                                                                                                   | Jade Wang, et al.                                                                                                                                                                                                                                            |
| EPI_ISL_631689, EPI_ISL_631690                                                 | Lincoln Medical Center                                                                                                                                                | New York City Public Health Laboratory                                                                                                                                                                                                                                                                                                                                   | Jade Wang, et al.                                                                                                                                                                                                                                            |
| EPI_ISL_631694, EPI_ISL_631695                                                 | OCME Office Of Chief Medical Examiner                                                                                                                                 | New York City Public Health Laboratory                                                                                                                                                                                                                                                                                                                                   | Jade Wang, et al.                                                                                                                                                                                                                                            |
| EPI_ISL_631697, EPI_ISL_631698                                                 | Jamaica Hospital Medical Center                                                                                                                                       | New York City Public Health Laboratory                                                                                                                                                                                                                                                                                                                                   | Jade Wang, et al.                                                                                                                                                                                                                                            |
| EPI_ISL_631701                                                                 | Flushing Hospital Medical Center                                                                                                                                      | New York City Public Health Laboratory                                                                                                                                                                                                                                                                                                                                   | Jade Wang, et al.                                                                                                                                                                                                                                            |
| EPI_ISL_631703, EPI_ISL_631704, EPI_ISL_631705, EPI_ISL_631706                 | Jamaica Hospital Medical Center                                                                                                                                       | New York City Public Health Laboratory                                                                                                                                                                                                                                                                                                                                   | Jade Wang, et al.                                                                                                                                                                                                                                            |
| EPI_ISL_631710                                                                 | Flushing Hospital Medical Center                                                                                                                                      | New York City Public Health Laboratory                                                                                                                                                                                                                                                                                                                                   | Jade Wang, et al.                                                                                                                                                                                                                                            |
| EPI_ISL_631711, EPI_ISL_631712, EPI_ISL_631716, EPI_ISL_631719, EPI_ISL_631720 | Jamaica Hospital Medical Center                                                                                                                                       | New York City Public Health Laboratory                                                                                                                                                                                                                                                                                                                                   | Jade Wang, et al.                                                                                                                                                                                                                                            |
| EPI_ISL_631724                                                                 | Flushing Hospital Medical Center                                                                                                                                      | New York City Public Health Laboratory                                                                                                                                                                                                                                                                                                                                   | Jade Wang, et al.                                                                                                                                                                                                                                            |
| EPI_ISL_631726, EPI_ISL_631728                                                 | Jamaica Hospital Medical Center                                                                                                                                       | New York City Public Health Laboratory                                                                                                                                                                                                                                                                                                                                   | Jade Wang, et al.                                                                                                                                                                                                                                            |
| EPI_ISL_631732                                                                 | Flushing Hospital Medical Center                                                                                                                                      | New York City Public Health Laboratory                                                                                                                                                                                                                                                                                                                                   | Jade Wang, et al.                                                                                                                                                                                                                                            |
| EPI_ISL_631733, EPI_ISL_631735, EPI_ISL_631736, EPI_ISL_631740                 | Jamaica Hospital Medical Center                                                                                                                                       | New York City Public Health Laboratory                                                                                                                                                                                                                                                                                                                                   | Jade Wang, et al.                                                                                                                                                                                                                                            |
| EPI_ISL_631754                                                                 | NYC HH Lincoln Medical And Mental Health Center                                                                                                                       | New York City Public Health Laboratory                                                                                                                                                                                                                                                                                                                                   | Jade Wang, et al.                                                                                                                                                                                                                                            |
| EPI_ISL_631755, EPI_ISL_631757                                                 | Richmond University Medical Center                                                                                                                                    | New York City Public Health Laboratory                                                                                                                                                                                                                                                                                                                                   | Jade Wang, et al.                                                                                                                                                                                                                                            |
| EPI_ISL_631758, EPI_ISL_631759, EPI_ISL_631760, EPI_ISL_631761, EPI_ISL_631762 | OCME Office Of Chief Medical Examiner                                                                                                                                 | New York City Public Health Laboratory                                                                                                                                                                                                                                                                                                                                   | Jade Wang, et al.                                                                                                                                                                                                                                            |
| EPI_ISL_631767, EPI_ISL_631768                                                 | Jamaica Hospital Medical Center                                                                                                                                       | New York City Public Health Laboratory                                                                                                                                                                                                                                                                                                                                   | Jade Wang, et al.                                                                                                                                                                                                                                            |
| EPI_ISL_631769, EPI_ISL_631770                                                 | Flushing Hospital Medical Center                                                                                                                                      | New York City Public Health Laboratory                                                                                                                                                                                                                                                                                                                                   | Jade Wang, et al.                                                                                                                                                                                                                                            |
| EPI_ISL_631772                                                                 | Jamaica Hospital Medical Center                                                                                                                                       | New York City Public Health Laboratory                                                                                                                                                                                                                                                                                                                                   | Jade Wang, et al.                                                                                                                                                                                                                                            |
| EPI_ISL_631773, EPI_ISL_631774                                                 | Flushing Hospital Medical Center                                                                                                                                      | New York City Public Health Laboratory                                                                                                                                                                                                                                                                                                                                   | Jade Wang, et al.                                                                                                                                                                                                                                            |
| EPI_ISL_631775, EPI_ISL_631776, EPI_ISL_631777                                 | Jamaica Hospital Medical Center                                                                                                                                       | New York City Public Health Laboratory                                                                                                                                                                                                                                                                                                                                   | Jade Wang, et al.                                                                                                                                                                                                                                            |
| EPI_ISL_631778, EPI_ISL_631781, EPI_ISL_631782                                 | St Barnabas Hospital                                                                                                                                                  | New York City Public Health Laboratory                                                                                                                                                                                                                                                                                                                                   | Jade Wang, et al.                                                                                                                                                                                                                                            |
| EPI_ISL_631797                                                                 | OCME Office Of Chief Medical Examiner                                                                                                                                 | New York City Public Health Laboratory                                                                                                                                                                                                                                                                                                                                   | Jade Wang, et al.                                                                                                                                                                                                                                            |
| EPI_ISL_631801                                                                 | Richmond University Medical Center                                                                                                                                    | New York City Public Health Laboratory                                                                                                                                                                                                                                                                                                                                   | Jade Wang, et al.                                                                                                                                                                                                                                            |
| EPI_ISL_631803, EPI_ISL_631806                                                 | Brookdale University Hospital Medical Center                                                                                                                          | New York City Public Health Laboratory                                                                                                                                                                                                                                                                                                                                   | Jade Wang, et al.                                                                                                                                                                                                                                            |
| EPI_ISL_631808, EPI_ISL_631811                                                 | Wyckoff Heights Medical Center                                                                                                                                        | New York City Public Health Laboratory                                                                                                                                                                                                                                                                                                                                   | Jade Wang, et al.                                                                                                                                                                                                                                            |
| EPI_ISL_631812, EPI_ISL_631813                                                 | Jamaica Hospital Medical Center                                                                                                                                       | New York City Public Health Laboratory                                                                                                                                                                                                                                                                                                                                   | Jade Wang, et al.                                                                                                                                                                                                                                            |
| EPI_ISL_631815                                                                 | Richmond University Medical Center                                                                                                                                    | New York City Public Health Laboratory                                                                                                                                                                                                                                                                                                                                   | Jade Wang, et al.                                                                                                                                                                                                                                            |
| EPI_ISL_631829                                                                 | Brookdale University Hospital Medical Center                                                                                                                          | New York City Public Health Laboratory                                                                                                                                                                                                                                                                                                                                   | Jade Wang, et al.                                                                                                                                                                                                                                            |
| EPI_ISL_631831                                                                 | VA NY Harbor Healthcare System                                                                                                                                        | New York City Public Health Laboratory                                                                                                                                                                                                                                                                                                                                   | Jade Wang, et al.                                                                                                                                                                                                                                            |
| EPI_ISL_631835, EPI_ISL_631836                                                 | Jamaica Hospital Medical Center                                                                                                                                       | New York City Public Health Laboratory                                                                                                                                                                                                                                                                                                                                   | Jade Wang, et al.                                                                                                                                                                                                                                            |
| EPI_ISL_631840, EPI_ISL_631841, EPI_ISL_631845                                 | OCME Office Of Chief Medical Examiner                                                                                                                                 | New York City Public Health Laboratory                                                                                                                                                                                                                                                                                                                                   | Jade Wang, et al.                                                                                                                                                                                                                                            |
| EPI_ISL_631866, EPI_ISL_631867                                                 | Jamaica Hospital Medical Center                                                                                                                                       | New York City Public Health Laboratory                                                                                                                                                                                                                                                                                                                                   | Jade Wang, et al.                                                                                                                                                                                                                                            |
| EPI_ISL_632310                                                                 | 1-Laboratory of Microbiology, National Reference Lab, Charles Nicolle Hospital; 2-University of Tunis ElManar, Faculty of Medicine of Tunis, LR99E509, Tunis, Tunisia | 1-Clinical and Experimental Pharmacology Lab, LR16SP02, National Center of Pharmacovigilance, University of Tunis El Manar, Tunis, Tunisia. 2-Neurodegenerative diseases and psychiatric troubles, LR18SP03, Razi Hospital, University of Tunis El Manar, Tunis, Tunisia. 3- Ministry of Health, National Observatory of New and Emerging Diseases, 1006, Tunis, Tunisia | Ilhem Boutiba-Ben Boubaker, Sameh Trabelsi, Nissaf Ben Alaya, Maher Kharrat, Alia Ben Kahla, Jalila Ben Khellil, Salma Abid, Sana Ferjani, Mouna Ben Sassi, Mouna Safer, Imen Mkada, Imen Kacem, Gaies Emna, Sournaya Rammeh, Riadh Daghfous, Riadh Gouider. |

|                |                                                                                                                            |                                                                                                                                                                                                                                          |                                                                                                                                                                                                                                                                                                                                                                |
|----------------|----------------------------------------------------------------------------------------------------------------------------|------------------------------------------------------------------------------------------------------------------------------------------------------------------------------------------------------------------------------------------|----------------------------------------------------------------------------------------------------------------------------------------------------------------------------------------------------------------------------------------------------------------------------------------------------------------------------------------------------------------|
| EPI_ISL_632312 | NU-sjukvården                                                                                                              | Clinical microbiology, Sahlgrenska University Hospital                                                                                                                                                                                   | Johan Ringlander, Josefín Olausson, Hedvig Engström Jakobsson, Magnus Lindh                                                                                                                                                                                                                                                                                    |
| EPI_ISL_632313 | NU-sjukvården                                                                                                              | Clinical Microbiology, Sahlgrenska University Hospital,                                                                                                                                                                                  | Johan Ringlander, Josefín Olausson, Hedvig Engström Jakobsson, Magnus Lindh                                                                                                                                                                                                                                                                                    |
| EPI_ISL_632934 | Department of Acute Infectious Diseases Control and Prevention,Yunnan Provincial Center for Disease Control and Prevention | Department of Acute Infectious Diseases Control and Prevention,Yunnan Provincial Center for Disease Control and Prevention                                                                                                               | Meiling Zhang,jienan Zhou,Senquan Jia,Xiaonan Zhao,Xiaoqing Fu                                                                                                                                                                                                                                                                                                 |
| EPI_ISL_632936 | Puskesmas Mlati 1 Sleman                                                                                                   | Genetics Working Group (Pokja Genetik) Faculty of Medicine, Public Health and Nursing Universitas Gadjah Mada (FK-KMK UGM); Disease Investigation Center Wates Ministry of Agriculture Indonesia; Department of Microbiology FK-KMK UGM; | Gunadi, Hendra Wibawa, Marcellus, Mohamad S. Hakim, Edwin W. Daniwijaya, Ludhang P. Rizki, Endah Supriyati, Eggi Arguni, Titik Nuryastuti, Tri Wibawa, Dwi AA Nugrahaningsih, Afiahayati, Siswanto, Kristy Iskandar, Nungki Anggorowati, Ika Trisnawati, Sumardi, Eko Budiono, Bambang Sigit Riyanto, Heni Retnowulan, Munawar Gani, Satria Maulana, Nur Rahmi |

|                                                                                                                                                                                                                                                                                                                                                                                                                                                                                                                                                                                                                                                                                                                                                                                                                                                                                                                                                                                                                                                                                                                                                                                |                                                                                                                                                                       |                                                                                                                                                                                                                                                                                                                                                                                                                                                                                                                                                          |                                                                                                                                                                                                                                                                                                                                       |
|--------------------------------------------------------------------------------------------------------------------------------------------------------------------------------------------------------------------------------------------------------------------------------------------------------------------------------------------------------------------------------------------------------------------------------------------------------------------------------------------------------------------------------------------------------------------------------------------------------------------------------------------------------------------------------------------------------------------------------------------------------------------------------------------------------------------------------------------------------------------------------------------------------------------------------------------------------------------------------------------------------------------------------------------------------------------------------------------------------------------------------------------------------------------------------|-----------------------------------------------------------------------------------------------------------------------------------------------------------------------|----------------------------------------------------------------------------------------------------------------------------------------------------------------------------------------------------------------------------------------------------------------------------------------------------------------------------------------------------------------------------------------------------------------------------------------------------------------------------------------------------------------------------------------------------------|---------------------------------------------------------------------------------------------------------------------------------------------------------------------------------------------------------------------------------------------------------------------------------------------------------------------------------------|
|                                                                                                                                                                                                                                                                                                                                                                                                                                                                                                                                                                                                                                                                                                                                                                                                                                                                                                                                                                                                                                                                                                                                                                                |                                                                                                                                                                       | Laboratorium Diagnostik Yayasan Tahija World Mosquito Program (WMP) Yogyakarta Center for Tropical Medicine FK-KMK UGM; Integrated Research Center FK-KMK UGM; Department of Computer Science and Electronics FMIPA UGM; RSUP Dr. Sardjito                                                                                                                                                                                                                                                                                                               | Ananda, Riat El Khair, Yunika Puspap Dewi, Osman Sianipari, Umi Solekhhah Intansari, Elizabeth Henny Heringtiyas, Ira Puspitawati, Nur Imma Fatimah Harahap, Ernawati, Untung Wirawan , William Widitjiasro                                                                                                                           |
| EPI_ISL_632937                                                                                                                                                                                                                                                                                                                                                                                                                                                                                                                                                                                                                                                                                                                                                                                                                                                                                                                                                                                                                                                                                                                                                                 | RSUD Saptosari Gunung Kidul                                                                                                                                           | Genetics Working Group (Pokja Genetik) Faculty of Medicine, Public Health and Nursing Universitas Gadjah Mada (FK-KMK UGM); Disease Investigation Center Wates Ministry of Agriculture Indonesia; Department of Microbiology FK-KMK UGM; Laboratorium Diagnostik Yayasan Tahija World Mosquito Program (WMP) Yogyakarta Center for Tropical Medicine FK-KMK UGM; Integrated Research Center FK-KMK UGM; Department of Computer Science and Electronics FMIPA UGM; Balai Besar Teknik Kesehatan Lingkungan dan Pengendalian Penyakit (BBTKLPP) Yogyakarta | Gunadi, Hendra Wibawa, Marcellus, Mohamad S. Hakim, Edwin W. Daniwijaya, Ludhang P. Rizki, Endah Supriyati, Eggi Arguni, Titik Nuryastuti, Tri Wibawa, Dwi AA Nugrahaningsih, Afiahayati, Siswanto, Kristy Iskandar, Nungki Anggorowati, Irene, Indaryati, Havid Setyawan, Eko Darmawan, Maria Patricia Inggriani, Audric Kenny Tedja |
| EPI_ISL_634977                                                                                                                                                                                                                                                                                                                                                                                                                                                                                                                                                                                                                                                                                                                                                                                                                                                                                                                                                                                                                                                                                                                                                                 | 1-Laboratory of Microbiology, National Reference Lab, Charles Nicolle Hospital; 2-University of Tunis ElManar, Faculty of Medicine of Tunis, LR99E509, Tunis, Tunisia | 1-Clinical and Experimental Pharmacology Lab, LR16SP02, National Center of Pharmacovigilance, University of Tunis El Manar, Tunis, Tunisia. 2-Neurodegenerative diseases and psychiatric troubles, LR18SP03, Razi Hospital, University of Tunis El Manar, Tunis, Tunisia. 3- Ministry of Health, National Observatory of New and Emerging Diseases, 1006, Tunis, Tunisia                                                                                                                                                                                 | Ilhem Boutiba-Ben Boubaker, Sameh Trabelsi, Nissaf Ben Alaya, Maher Kharrat, Alia Ben Kahla, Jalila Ben Khellil, Salma Abid, Sana Ferjani, Mouna Ben Sassi, Mouna Safer, Imen Mkada, Imen Kacem, Gaies Emna, Soumaya Rammeh, Riadh Daghfous, Riadh Gouider.                                                                           |
| EPI_ISL_634978, EPI_ISL_634979, EPI_ISL_634981, EPI_ISL_634983, EPI_ISL_634984, EPI_ISL_634985, EPI_ISL_634986, EPI_ISL_634987, EPI_ISL_634989, EPI_ISL_634990, EPI_ISL_634993, EPI_ISL_634994, EPI_ISL_634995, EPI_ISL_634996, EPI_ISL_634997, EPI_ISL_634998, EPI_ISL_634999, EPI_ISL_635000, EPI_ISL_635001, EPI_ISL_635002, EPI_ISL_635003, EPI_ISL_635004, EPI_ISL_635005, EPI_ISL_635006, EPI_ISL_635007, EPI_ISL_635008, EPI_ISL_635009, EPI_ISL_635010, EPI_ISL_635011, EPI_ISL_635012, EPI_ISL_635013, EPI_ISL_635014, EPI_ISL_635015, EPI_ISL_635016, EPI_ISL_635017, EPI_ISL_635018, EPI_ISL_635019, EPI_ISL_635021, EPI_ISL_635022, EPI_ISL_635024, EPI_ISL_635025, EPI_ISL_635026, EPI_ISL_635027, EPI_ISL_635029, EPI_ISL_635030, EPI_ISL_635031, EPI_ISL_635032, EPI_ISL_635033, EPI_ISL_635034, EPI_ISL_635035, EPI_ISL_635036, EPI_ISL_635037, EPI_ISL_635038, EPI_ISL_635039, EPI_ISL_635040, EPI_ISL_635041, EPI_ISL_635043, EPI_ISL_635045, EPI_ISL_635046, EPI_ISL_635047, EPI_ISL_635048, EPI_ISL_635049, EPI_ISL_635050, EPI_ISL_635051, EPI_ISL_635052, EPI_ISL_635053, EPI_ISL_635054, EPI_ISL_635055, EPI_ISL_635056, EPI_ISL_635057, EPI_ISL_635058 |                                                                                                                                                                       |                                                                                                                                                                                                                                                                                                                                                                                                                                                                                                                                                          |                                                                                                                                                                                                                                                                                                                                       |
| see above                                                                                                                                                                                                                                                                                                                                                                                                                                                                                                                                                                                                                                                                                                                                                                                                                                                                                                                                                                                                                                                                                                                                                                      | National Health Laboratory Service - Inkosi Albert Luthuli Central Hospital (NHLS-IALCH)                                                                              | KRISP, KZN Research Innovation and Sequencing Platform                                                                                                                                                                                                                                                                                                                                                                                                                                                                                                   | Giandhari J, Pillay S, Lessells R, Mdlalose K, York D, Khan S, Tegally H, Wilkinson E, de Oliveira T                                                                                                                                                                                                                                  |
| EPI_ISL_635061, EPI_ISL_635062                                                                                                                                                                                                                                                                                                                                                                                                                                                                                                                                                                                                                                                                                                                                                                                                                                                                                                                                                                                                                                                                                                                                                 | 1-Laboratory of Microbiology, National Reference Lab, Charles Nicolle Hospital; 2-University of Tunis ElManar, Faculty of Medicine of Tunis, LR99E509, Tunis, Tunisia | 1-Clinical and Experimental Pharmacology Lab, LR16SP02, National Center of Pharmacovigilance, University of Tunis El Manar, Tunis, Tunisia. 2-Neurodegenerative diseases and psychiatric troubles, LR18SP03, Razi Hospital, University of Tunis El Manar, Tunis, Tunisia. 3- Ministry of Health, National Observatory of New and Emerging Diseases, 1006, Tunis, Tunisia                                                                                                                                                                                 | Ilhem Boutiba-Ben Boubaker, Sameh Trabelsi, Nissaf Ben Alaya, Maher Kharrat, Alia Ben Kahla, Jalila Ben Khellil, Salma Abid, Sana Ferjani, Mouna Ben Sassi, Mouna Safer, Imen Mkada, Imen Kacem, Gaies Emna, Soumaya Rammeh, Riadh Daghfous, Riadh Gouider.                                                                           |
| EPI_ISL_636476, EPI_ISL_636477, EPI_ISL_636485                                                                                                                                                                                                                                                                                                                                                                                                                                                                                                                                                                                                                                                                                                                                                                                                                                                                                                                                                                                                                                                                                                                                 | CNR Virus des Infections Respiratoires - France SUD                                                                                                                   | CNR Virus des Infections Respiratoires - France SUD                                                                                                                                                                                                                                                                                                                                                                                                                                                                                                      | Antonin Bal, Gregory Destras, Gwendolynne Burfin, Hadrien Règue, Alexandre Gaymard, Maude Bouscambert-Duchamp, Florence Morfin-Sherpa, Martine Valette, Bruno Lina, Laurence Josset                                                                                                                                                   |
| EPI_ISL_636737, EPI_ISL_636834, EPI_ISL_636835, EPI_ISL_636837                                                                                                                                                                                                                                                                                                                                                                                                                                                                                                                                                                                                                                                                                                                                                                                                                                                                                                                                                                                                                                                                                                                 | Laboratório de Imunofarmacologia - Instituto Oswaldo Cruz                                                                                                             | Laboratório de Imunofarmacologia - Instituto Oswaldo Cruz                                                                                                                                                                                                                                                                                                                                                                                                                                                                                                | Souza,T.M., Fintelman-Rodrigues,N., De Paula,A.D., Saraiva,F.B., Ferreira,M.A. and Sacramento,C.Q.                                                                                                                                                                                                                                    |
| EPI_ISL_636964                                                                                                                                                                                                                                                                                                                                                                                                                                                                                                                                                                                                                                                                                                                                                                                                                                                                                                                                                                                                                                                                                                                                                                 | Pathogen Genomics Lab King Abdullah University of Science and Technology(KAUST)                                                                                       | Pathogen Genomics Lab King Abdullah University of Science and Technology(KAUST)                                                                                                                                                                                                                                                                                                                                                                                                                                                                          | Rahul P Salunke, Sharif Hala, Raaeece Naeem, Sara Mfarrej, Amit Kumar Subudhi, Amanda Ooi, Luke Esau, Fadwa Alofi, Fathia Ben Rached, Afrah Alsomali, Asim Khogeer, Ahmad Bakur Mahmoud, Anwar Hashem, Naif Almontashiri, Arnab Pain                                                                                                  |
| EPI_ISL_636965                                                                                                                                                                                                                                                                                                                                                                                                                                                                                                                                                                                                                                                                                                                                                                                                                                                                                                                                                                                                                                                                                                                                                                 | Pathogen Genomics Lab King Abdullah University of Science and Technology(KAUST)                                                                                       | Pathogen Genomics Lab King Abdullah University of Science and Technology(KAUST)                                                                                                                                                                                                                                                                                                                                                                                                                                                                          | Raaeece Naeem, Rahul P Salunke, Sharif Hala, Sara Mfarrej, Amit Kumar Subudhi, Fadwa Alofi, Fathia Ben Rached, Afrah Alsomali, Asim Khogeer, Ahmad Bakur Mahmoud, Anwar Hashem, Naif Almontashiri, Arnab Pain                                                                                                                         |
| EPI_ISL_636966, EPI_ISL_636967                                                                                                                                                                                                                                                                                                                                                                                                                                                                                                                                                                                                                                                                                                                                                                                                                                                                                                                                                                                                                                                                                                                                                 | Pathogen Genomics Lab King Abdullah University of Science and Technology(KAUST)                                                                                       | Pathogen Genomics Lab King Abdullah University of Science and Technology(KAUST)                                                                                                                                                                                                                                                                                                                                                                                                                                                                          | Fathia Ben Rached, Raaeece Naeem, Sharif Hala, Fadwa Alofi, Rahul P Salunke, Sara Mfarrej, Amit Kumar Subudhi, Afrah Alsomali, Asim Khogeer, Ahmad Bakur Mahmoud, Anwar Hashem, Naif Almontashiri, Arnab Pain                                                                                                                         |
| EPI_ISL_636969, EPI_ISL_636970, EPI_ISL_636971                                                                                                                                                                                                                                                                                                                                                                                                                                                                                                                                                                                                                                                                                                                                                                                                                                                                                                                                                                                                                                                                                                                                 | Etlík Veterinary Control Central Research Institute                                                                                                                   | Etlík Veterinary Control Central Research Institute                                                                                                                                                                                                                                                                                                                                                                                                                                                                                                      | Sabri Hacıoglu, Ahu Pakdemirli, Dilek Dulger, Erdem Danyer, Ummu Sena Sari, Cevdet Yaralı, Ozcan Yildirim                                                                                                                                                                                                                             |
| EPI_ISL_636972                                                                                                                                                                                                                                                                                                                                                                                                                                                                                                                                                                                                                                                                                                                                                                                                                                                                                                                                                                                                                                                                                                                                                                 | Pathogen Genomics Lab King Abdullah University of Science and Technology (KAUST)                                                                                      | Pathogen Genomics Lab King Abdullah University of Science and Technology (KAUST)                                                                                                                                                                                                                                                                                                                                                                                                                                                                         | Afrah Alsomali, Fathia Ben Rached, Raaeece Naeem, Sharif Hala,Rahul P Salunke, Amanda Ooi, Luke Esau, Sara Mfarrej, Amit Kumar Subudhi, Fadwa Alofi, Asim Khogeer, Kahled Algithami, Anwar Hashem, Naif Almontashiri, Arnab Pain                                                                                                      |
| EPI_ISL_636973                                                                                                                                                                                                                                                                                                                                                                                                                                                                                                                                                                                                                                                                                                                                                                                                                                                                                                                                                                                                                                                                                                                                                                 | Public Health Lab                                                                                                                                                     | Public Health Lab                                                                                                                                                                                                                                                                                                                                                                                                                                                                                                                                        | Alwasti, H                                                                                                                                                                                                                                                                                                                            |
| EPI_ISL_636977                                                                                                                                                                                                                                                                                                                                                                                                                                                                                                                                                                                                                                                                                                                                                                                                                                                                                                                                                                                                                                                                                                                                                                 | HP Pemba                                                                                                                                                              | KRISP, KZN Research Innovation and Sequencing Platform                                                                                                                                                                                                                                                                                                                                                                                                                                                                                                   | Ismael N, Giandhari J, Pillay S, Tegally H, Wilkinson E, de Oliveira T, Nadia Siteo, Paulo Arnaldo, Nedio Mabunda                                                                                                                                                                                                                     |
| EPI_ISL_636980                                                                                                                                                                                                                                                                                                                                                                                                                                                                                                                                                                                                                                                                                                                                                                                                                                                                                                                                                                                                                                                                                                                                                                 | CS Xai Xai                                                                                                                                                            | KRISP, KZN Research Innovation and Sequencing Platform                                                                                                                                                                                                                                                                                                                                                                                                                                                                                                   | Ismael N, Giandhari J, Pillay S, Tegally H, Wilkinson E, de Oliveira T, Nadia Siteo, Paulo Arnaldo, Nedio Mabunda                                                                                                                                                                                                                     |
| EPI_ISL_637108, EPI_ISL_637109                                                                                                                                                                                                                                                                                                                                                                                                                                                                                                                                                                                                                                                                                                                                                                                                                                                                                                                                                                                                                                                                                                                                                 | Laboratorio Biologia Molecolare Sars Cov2 - UOC. Laboratorio Analisi - Servizio Medicina di Laboratorio, Ospedale "San Francesco" - ATS-ASSL Nuoro                    | Laboratorio specialistico UOC Ematologia - Ospedale "San Francesco" - ATS-ASSL Nuoro                                                                                                                                                                                                                                                                                                                                                                                                                                                                     | Piras Giovanna, Fancello Tatiana, Asproni Rosanna, Fiamma Maura, Monne Maria Itria, Toja Alessandro, Sanna Filomena, Floris Anna Rita, Sulis Vincenzo, Palmas Angelo Domenico, Casu Gavino, Lo Maglio Iana, Marnelli Giuseppe                                                                                                         |

GISAID Accession Numbers:

437930;447094;441372;429314;447055;426319;447200;447189;426030;426031;426034;426035;426036;426037;426039;426040;426041;426043;426045;426046;426047;426048;426050;425224;426298;426300;426303;426304;426306;426309;426310;426311;426312;426313;445365;427579;427546;424371;449912;428745;438114;437965;436874;448210;449203;449226;449204;418119;416508;447297;421346;421543;421544;421545;441666;428398;428936;421306;421314;421299;420053;429525;436822;427569;427568;427618;428693;427574;427551;427617;427559;427608;427540;427571;427575;427550;427537;427538;427580;427573;427584;427597;427532;427549;427604;417857;427596;427526;417620;417873;418224;444589;420906;438597;450106;450114;450124;450130;450133;450142;450155;450082;450086;450089;450095;450032;450036;422533;422529;422489;421634;421596;421403;421411;421417;421402;421428;421385;421395;427561;447221;416452;429794;429722;443284;429345;433582;443243;448502;435516;435456;427521;442741;418974;434821;418200;437771;427476;449793;449792;449794;445423;422164;432297;422081;432296;448903;420221;442350;447190;444608;422655;422656;422696;444259;444096;449639;418690;434661;434664;432383;432300;445950;421005;432305;445720;446060;432233;446435;445946;422124;432275;445606;445597;432197;432219;445602;422042;432309;445601;445833;432330;423620;446934;442749;440733;444238;441049;444087;444089;444093;444194;434641;434675;434671;434658;434660;425366;434665;434652;445232;445227;429127;423086;422035;445236;434663;434668;430857;430859;445230;445239;445228;445240;445237;434670;434659;429126;429161;429162;434642;445233;434669;445225;423563;437014;428148;444134;439405;440579;440600;442998;442898;443394;449636;427154;444491;449627;444239;444195;444228;444265;444251;424402;424598;424585;437654;443692;424623;423827;422777;419428;438498;444920;437667;433936;444487;429558;442793;440542;444488;442939;449708;449683;444222;444217;444205;418195;442285;441549;442213;444489;442143;418076;430663;425519;425525;443100;441606;438446;438459;426746;439555;423596;420752;428400;430355;430407;436467;428873;437971;437955;436831;419708;435490;435532;427548;437957;450049;449846;430147;444533;429569;429464;428390;428373;435021;422578;419606;434331;421587;444765;420072;430350;427628;447417;447313;447393;435377;435375;435376;436915;430023;430034;430029;430036;430027;430026;438608;428380;428375;425259;439889;430908;435721;422500;420097;426326;426327;435008;435009;444612;430363;429199;450179;424973;426539;418201;422490;421731;423117;434235;429033;429031;418193;420571;422652;434992;427286;424960;434220;422506;450058;422553;438029;438082;429440;415487;429030;418351;421742;419584;418803;418807;450068;450020;434942;434903;444570;434906;427614;438144;438169;434228;420143;449948;427589;449951;449878;449849;438192;430115;434243;427213;417677;417693;417853;449300;424491;436485;449999;450002;427542;436469;436471;436474;419600;436041;424878;426434;429982;419258;420022;420021;420629;419257;429981;426455;420020;420630;420019;447698;428350;447722;428793;430374;435404;437252;437007;429301;429306;429309;428791;430428;437628;430369;421386;428999;424970;437791;430431;421741;438704;436818;426826;436814;447167;447197;447310;447289;437219;450170;421412;450013;421394;437380;437368;424367;438036;438042;438035;438043;419175;427223;447291;426084;423384;433488;438669;438554;433966;444374;434041;438568;433740;425263;433914;433672;433686;433761;444376;444398;444339;438592;438677;438716;433923;429733;430434;429480;429581;429482;437004;436991;430358;444790;427475;444775;420018;426999;445372;445284;442085;437594;433958;443080;437599;415481;444766;450075;450076;420293;450087;450088;430391;444730;444701;421577;430393;416748;435522;429656;422609;423187;422086;432278;430498;433353;432258;420745;444437;439464;436830;426819;435508;430388;444662;417938;444791;429035;444716;444748;444769;444729;424937;444750;424353;440386;427282;437891;435119;420081;426617;428877;422421;430373;428795;444688;427636;427494;427518;444703;430414;424988;419941;438153;429627;450132;450014;444666;424408;444635;435481;421590;422508;444721;421719;444722;444691;430368;421585;427491;450165;427641;419590;437951;434674;435063;420579;428892;428902;426620;426622;426623;436

108;448673;424671;448723;435123;435129;435130;435286;427485;416830;428871  
;428875;427638;428905;429118;444645;430333;430334;430345;430412;447724;42  
1279;424950;447705;447708;447671;447673;447675;447663;428990;444070;44405  
7;429002;429014;444073;444074;437255;416501;436893;435548;444781;428912;4  
22373;446024;422024;444763;435051;435052;429511;426632;422419;444777;4446  
69;426554;426529;450093;418915;444578;444609;436894;436895;424944;421762;  
444710;430356;445115;428363;430417;427238;435526;428760;435495;427474;428  
785;428770;444752;444723;444629;444685;444686;444658;444665;444668;430337  
;430346;430347;430348;430323;430328;430329;430418;424932;424938;424959;42  
1732;421579;421586;428996;435536;435549;427502;420056;421509;416496;42004  
9;427539;416509;416512;416513;445292;436497;419839;445114;427120;419978;4  
37428;437429;419902;419972;444704;444677;443302;437554;445116;418963;4189  
64;445113;437588;437591;437592;445094;437574;437598;437555;435521;424370;  
447308;447288;447290;447286;447283;447282;447306;421396;444621;430389;444  
627;430426;421588;435504;444724;427018;430326;428403;429026;450111;428396  
;435704;430379;419909;444711;444678;427635;428797;435518;444713;430364;42  
1722;444657;447714;428993;447726;427492;428772;444642;430416;428904;42750  
9;427481;430342;444616;430399;435534;430415;427489;444640;418254;430402;4  
43285;418968;437645;418228;426619;447674;424954;430400;429018;417331;4346  
03;434601;434602;434604;428740;422496;450112;450128;450145;450157;422542;  
422488;421608;421416;421423;422499;450018;450138;421424;447338;450118;450  
046;450065;422525;450169;422502;421628;422554;450011;422535;428393;424934  
;418976;447429;447365;444693;421717;418199;435722;430324;431083;431096;43  
5535;424964;427503;421704;430919;430419;444755;435503;430961;426055;42170  
6;447386;447438;447351;447424;435702;447343;447444;431084;435703;428395;4  
28397;447401;450135;447434;447422;431085;428392;447387;447406;447420;4474  
52;428387;442595;421397;450074;421375;421434;430798;427395;444687;450152;  
444776;424936;430404;420577;420590;435501;435547;428778;445182;444764;435  
525;435515;421584;435494;424946;435537;444623;424935;444636;421729;427637  
;444624;421725;421727;444664;418358;418359;444758;428750;430406;427488;43  
0409;420307;436549;435523;435480;424962;421376;427504;427513;430325;43037  
5;420300;428746;428399;444646;447263;447312;447264;444695;435500;428401;4  
35479;444732;427511;444705;430381;419700;436048;436059;427498;421632;4274  
82;428405;430816;444683;424949;426621;428792;444071;427480;436077;427553;  
421422;421388;421389;427514;427629;420297;418973;420581;430382;428800;421  
597;450053;421421;422512;434549;435519;430420;421583;426618;424953;436078  
;424951;421598;421709;444772;428761;421410;426821;422527;422552;444717;42  
4965;447381;421581;430370;444619;428768;444694;430351;447224;450030;45005  
0;422503;422510;427585;427588;427631;424943;430810;447348;447340;447349;4  
47402;421366;450154;421413;421355;426293;426308;426314;436493;427586;4275  
70;427610;427556;426655;417420;436060;436066;436074;436071;444648;430367;  
424958;424956;444628;444634;444759;444749;424948;430372;424942;428766;444  
780;444660;426656;444651;444675;444734;430354;444744;435489;448042;422980  
;417499;417476;438551;444362;421688;428296;444550;429051;444684;418918;44  
8357;430387;444706;427512;424195;437872;450240;422509;422531;421631;42160  
4;450166;449102;417937;428250;428369;428773;421937;444757;428998;435400;4  
36899;428752;428391;435483;450164;450162;428783;430362;427515;430365;4364  
72;436480;438155;427602;437117;426816;421620;447809;447810;444587;450060;  
447416;427578;422516;429449;427616;427530;426511;429445;447279;434368;447  
426;444753;437586;435530;445111;447172;436843;447178;447101;447115;438229  
;426032;428688;429707;447064;447104;436808;447059;436864;447220;447068;44  
7113;437518;437841;419702;420573;445119;421675;429129;421728;436079;42759  
2;427607;426128;444737;423382;419665;444715;423041;447017;420183;425137;4  
44700;430429;444644;430330;436481;417516;427487;428991;427479;444725;4303  
80;426299;450168;421432;430967;427185;427160;426809;426940;426799;427006;  
430573;447436;441659;447207;418400;428787;443209;450173;445150;425897;427  
132;419982;436501;436979;450070;421420;429642;437870;427165;428924;429512  
;444888;429590;437634;437677;429510;429329;436131;426929;417874;430607;41

9585;430616;428799;437365;430427;437377;437384;437376;437371;436898;436892;436896;444702;444794;427116;430528;430615;421715;418985;429181;427627;427109;427155;427011;426736;427057;430600;442095;441411;426866;426872;426994;430482;426972;427164;437915;427079;438150;417875;419880;419952;419954;426690;430686;430552;450042;428374;436476;444771;426625;444671;419742;419778;419865;418197;447435;447342;447418;436631;430091;428316;424260;430639;447410;434587;447344;447445;447355;447404;428377;420096;419525;450084;450062;422514;421360;435720;447377;427273;421371;419872;421589;427533;427534;427535;427312;430377;426875;435401;436897;426160;422461;426161;429846;429847;429848;422462;429845;435394;435397;435398;435399;426561;426562;426563;426565;426566;426567;422528;427581;427563;436824;427529;443198;437513;424945;426092;425149;421332;421287;450143;430882;425150;425159;416642;423011;421302;421311;422994;450079;450080;435350;416491;416492;421354;447780;435700;445097;423020;424170;418194;429011;445180;437560;429023;430031;450141;450081;426951;430973;418204;417665;418192;444643;430331;424968;437795;430550;427576;427566;418360;435379;436928;419188;435529;445288;429498;427269;426305;444022;449791;420540;438160;438168;438206;449875;449847;449848;438149;422453;429626;420299;437984;417833;417872;444873;437013;444818;429375;429376;429431;418220;421551;445079;420149;416505;447209;447194;449899;438170;438175;418236;426654;417614;424609;424610;424578;417748;417835;417842;417844;417570;417654;444996;444995;444997;418196;421342;447216;419896;437228;437388;437389;437801;437800;437406;437391;437390;437387;437407;437392;437802;429015;419855;429016;418348;418374;418356;429575;429370;447260;447269;427493;434329;427557;427567;427605;434318;438167;438163;438165;438164;449908;418972;437944;424413;424591;416478;417683;417721;421409;450140;429067;426961;443312;444883;447165;436812;436477;447091;436482;436483;436488;436489;436490;436495;436502;436492;436498;436494;437629;429324;420238;429415;429469;436629;434689;419674;426026;426029;426033;426525;426558;426559;420793;418226;424906;424880;424887;420580;422947;436107;427633;436065;436043;430432;420575;420296;430143;430149;430148;426839;427162;434910;434989;434841;444654;424304;428388;450156;422374;421578;426053;434309;434130;427562;421363;444736;435527;430336;430349;444768;444659;419703;421720;430335;417497;417474;429638;421718;437869;426090;429605;427235;424300;427268;430898;429639;430930;430980;424291;424172;424290;437818;424299;427211;424325;426118;424237;424187;424293;426105;430941;427198;437855;427248;429629;429644;434224;430136;426457;426466;426467;424236;426124;428767;425161;437845;426086;447105;424306;424339;436870;434682;444586;417492;417469;429402;429371;429453;440526;433790;437296;437227;439236;433074;425912;439179;445299;436829;447179;423029;419881;434688;417797;417555;429013;429647;435499;419527;428379;435706;419516;418058;418039;427500;424216;424335;438140;436841;425765;436987;419592;437138;419603;427470;444712;445438;429772;443825;441214;430855;430851;430849;417735;417855;429348;437925;420312;420311;437650;429391;429277;435292;435291;420578;420589;444650;449829;445167;437427;427201;430341;435514;444639;435486;424563;435542;417352;430386;419948;426463;429265;429267;418022;419845;437426;416510;431782;436884;426865;426470;426471;426315;437566;450191;445164;437561;437589;422430;437372;436859;417854;417866;417692;417846;426028;438226;417731;417784;429883;420145;420308;420570;429573;436982;445081;438157;424496;422650;425994;433217;449937;438158;430130;427594;427558;431017;416504;430396;427787;430392;444733;444617;428762;444690;424939;444655;444670;444756;419824;427092;427094;419956;427095;427778;427794;427780;427782;427785;427808;427679;427669;427688;427768;427791;427760;427708;424271;426114;427683;427764;427682;427775;419943;426725;426729;426860;426862;430927;450040;419942;430430;426052;450104;450044;430921;444761;444789;421615;429992;421348;426056;426797;421626;450161;421400;425911;427783;419940;419938;420012;427742;421636;418198;427689;435477;424504;420572;427612;427601;421599;450047;427472;430332;421733;436072;436040;436057;436061;436062;436075;436080;436082;436067;436073;436058;436070;436069;436051;436081;436056;449943;449944;449946;4

49949;438154;434274;434292;434234;447277;437978;429339;427281;443263;443298;430853;420761;422408;429024;450236;443483;447701;414630;428360;418237;421505;428357;428356;416498;428351;428355;449969;449933;449934;449935;449968;449970;449936;449872;421458;443309;443316;421500;427232;420037;433243;433244;439296;433127;449311;433156;433114;433119;433180;439187;439230;439223;425866;425992;425906;425907;426003;433122;439211;418241;418242;449971;438210;449871;443264;449945;449947;434237;434321;418349;418350;417935;431019;437873;426768;419915;429517;429585;434922;434895;435533;437214;447118;420147;444519;444747;435506;429643;429625;448793;437524;426078;427270;426297;444922;444966;437025;444881;450051;418387;419174;448715;448711;427639;420140;422752;426507;447618;424952;428776;429285;429527;434646;424400;424532;417682;429521;436984;444874;444844;437630;437646;436969;429492;437017;415648;429479;444869;437032;429493;429320;444923;429489;444965;437672;437020;444856;444877;444884;444870;429519;429540;429543;429552;429557;429562;429563;429574;429506;429305;429307;444929;429318;429322;444940;429472;429477;429481;429483;429485;429488;429496;436967;436985;436993;436995;444862;429289;444933;429293;429304;437021;444954;437016;444947;436986;444885;444850;444968;429331;429463;429321;437668;437676;444924;444863;436980;437042;437640;437003;437018;424622;429546;429556;417690;437637;444952;437631;444638;421195;430858;429134;429132;437095;429131;429130;437028;419997;419999;430556;419852;419822;426804;419911;419989;419720;426807;419983;427640;428786;434504;445067;435520;436878;423466;430401;427519;421593;417832;437935;447098;437943;427233;429536;436879;416655;444633;434319;425131;443230;433370;417701;427613;427603;423042;430842;434708;429750;415650;420085;421194;417020;418646;418636;424637;421182;437945;417705;438034;436875;437960;437962;438026;434229;418631;430635;424955;444788;430421;428385;421391;421623;428394;427630;444738;426542;450160;421414;421387;422530;450054;444714;418895;420098;420087;422551;421407;437865;427496;421710;435528;435545;444751;444726;429669;424929;445357;429278;447467;425168;420089;424972;444739;430359;430907;421369;430915;430405;434871;418836;434915;427264;435475;416671;434737;426953;440271;447300;421629;447812;450146;418006;427229;447385;428751;450120;419297;447800;434785;428769;444625;423002;437868;437525;428389;424253;426861;418344;419660;422520;416674;434880;417508;417513;419300;419299;447817;417452;422550;430926;424281;430950;418382;425143;417506;417510;418810;421310;421321;434613;419296;419298;427451;427434;428748;417192;447769;447350;447360;418833;418837;426117;430922;418831;418835;447778;447090;447473;429988;435583;447228;437896;437900;434455;445285;437890;426320;437894;445348;445253;418399;450148;447744;421401;450159;422556;447777;421383;447797;424273;423023;424975;420302;447229;436603;428322;436582;436571;436579;436590;436569;436570;436567;427430;427447;428284;444599;436617;428731;425156;428326;428338;428300;428301;436601;436589;436635;436313;447337;426844;427038;419819;419261;437626;447792;439963;420508;427041;447813;450037;429680;426121;429667;447805;447739;447740;447741;447738;447743;447808;447763;445325;447742;447762;447807;447806;449030;449095;448999;424850;437330;427510;426430;426431;426433;447841;424892;427428;426419;428758;418898;426568;426564;426550;426551;426552;426553;426560;426569;426544;426547;426555;426546;426548;427473;437720;427634;417372;444276;437567;447843;422560;435511;435492;427632;429645;435498;421582;429017;435524;430340;427471;424947;421592;420797;424869;436475;434164;434268;449996;438201;449957;449977;438199;438197;426461;434919;426468;432203;446590;426462;435040;430366;426624;428798;430360;430352;424963;430384;430390;421361;435496;435541;419260;435393;436927;428765;418357;435657;420599;450078;427495;429681;437463;428916;426285;417018;418639;418654;418660;428346;418650;421190;422600;422585;422747;422778;427357;427372;421200;424645;421183;421188;421189;427349;427354;437468;417944;422769;437340;437343;428719;427391;437304;437328;422582;422733;437697;416831;427478;428784;424966;435485;426301;428759;426935;430567;444762;447054;445243;427525;424901;424886;426432;428231;426528;447844;424885;424891;420798;437905;426318;426752;418345;

436486;436499;422411;447614;436484;427564;427572;427552;427545;447341;427  
565;427593;434864;449895;413592;427582;430343;436055;437716;437694;437746  
;437751;444918;437474;437492;443177;437707;437734;437737;437745;437440;44  
7541;447542;444484;447540;447534;444485;447543;447535;436459;429544;44523  
5;418394;438693;425256;443649;418404;418395;432505;447042;437478;418392;4  
48084;447979;438749;438726;420223;418401;438602;438566;443482;440745;4183  
93;418406;438735;437476;447537;425631;433402;441407;448786;448787;448778;  
437199;437298;437299;437200;437202;427676;437933;437693;428720;428714;429  
866;429871;437491;443176;428715;428721;429867;437490;437489;437762;443174  
;443175;430819;437464;437493;437494;437483;437485;437487;437488;437700;43  
7702;437708;437719;437749;437750;437758;437732;437735;437738;437742;43774  
4;443168;443170;443172;443173;443178;443179;437695;437713;437729;437724;4  
37728;437726;437696;437712;437714;437717;437730;437711;437486;443171;4470  
41;447040;437706;437710;437739;437715;437310;437326;437731;429869;428723;  
429863;428716;429861;437723;437736;447049;435055;447051;447548;447050;437  
452;447033;447046;444486;447045;444465;444466;444476;447035;444464;444461  
;447039;447048;444472;447553;437445;437446;444469;447546;447043;447044;44  
4459;435065;435066;435068;435067;435069;437748;437692;437703;437691;43774  
0;437733;437496;443181;437704;437718;437743;428909;437741;437482;443167;4  
37709;437481;443166;444470;447536;447538;447539;437449;437470;437469;4470  
37;447036;444480;444474;447053;447552;444482;447555;444467;437479;444457;  
444456;444471;450187;437473;416521;416522;437477;437471;437188;428717;444  
832;426425;435505;420610;428781;418377;428367;445338;445345;445279;445297  
;445301;445341;424855;424857;444067;444077;444052;444059;444053;445342;44  
5344;445335;437600;445340;445343;445336;445310;445304;445316;445347;41732  
8;445339;445379;434615;445328;445360;445368;445363;430633;426898;430632;4  
45289;445346;445354;436473;420604;420621;415710;433270;418219;450158;4225  
57;414628;427306;419168;416758;420617;428794;447119;417778;420616;419184;  
443303;420052;430806;420608;418430;419173;419179;418413;420615;429665;434  
351;430820;428790;419171;419172;418425;418431;417336;447448;419169;436478  
;429152;447661;439438;447703;414626;440697;418390;444006;449809;420821;43  
0863;428880;429155;447723;447682;424884;424845;424843;424844;424873;42490  
9;424910;424911;424912;424916;424917;424918;424867;424882;424883;424846;4  
20073;443283;424914;424920;434488;445075;434514;434495;443287;445066;4288  
57;444912;418233;443260;443311;418229;448968;419929;426755;419916;419181;  
418416;443317;428962;418232;420076;443292;419177;445065;434500;420606;417  
879;447659;437332;428712;447732;447715;447666;418353;418347;426042;430424  
;449834;419863;420084;418978;436103;429206;418238;441266;428255;421343;42  
8345;428254;428256;447456;447463;447432;447460;418225;418223;430052;43662  
6;425170;434941;447403;447316;447440;418346;432375;439637;441654;443630;4  
47981;447959;437411;437413;437415;437412;437414;426428;424847;424908;4249  
15;424919;424872;427122;427123;427034;427115;436616;436618;437420;437418;  
437416;417878;418920;434852;437417;438223;437419;437437;436465;443258;443  
259;443306;447677;414632;428349;417411;436615;429818;418227;428358;420045  
;417316;447375;428347;441621;443540;443104;426718;443289;420041;421390;44  
7345;447347;428261;420324;436512;419712;419706;422513;449833;449838;42645  
8;429973;426456;429972;429985;429979;429983;429986;429984;429974;429976;4  
17517;429978;419256;426465;429987;429980;429975;429977;426454;429969;4264  
75;419710;432186;424465;440367;424454;420050;414637;426292;417440;420060;  
448222;420042;447399;447384;447400;436613;436606;436625;447366;447359;447  
339;447294;415654;417433;414633;444180;428344;434687;428272;447468;428291  
;414638;428353;416497;421510;447689;419897;420876;427081;419892;423394;42  
3399;438306;443686;438840;442533;425295;444124;433810;418668;448705;44846  
8;448503;448536;419998;440985;421798;442818;442254;448092;433762;419811;4  
20724;420727;442559;420479;449653;441046;442077;443409;443510;418701;4187  
56;423633;423453;444128;440096;440744;423105;421772;421862;428930;423446;  
441728;438575;438351;442292;441772;442288;443031;442295;439974;425320;442  
712;442283;421799;420478;423965;421912;442268;440050;443852;443958;440770

;443527;443604;438325;441650;441593;438257;442221;441114;440752;440801;440643;439986;443812;443775;440002;421863;423593;423568;423558;421791;421796;421815;421774;421779;421895;423261;423265;424012;423732;423256;423147;423262;423264;423400;442278;421894;423733;423498;421778;423741;437699;437753;427477;430344;424362;447453;435415;429686;444250;444340;422065;436463;447038;421336;432984;444905;429524;434808;434798;434858;434914;434800;434894;434859;434984;435028;434959;434963;434947;434979;434999;434994;434876;434990;434878;434957;434951;434805;434868;437632;437678;444931;444896;429526;437635;444904;429490;444901;444937;444930;437669;437039;444921;444944;444935;437033;437038;437040;444861;429539;429547;429548;429553;429555;429580;444910;444903;444938;444958;444959;444960;437670;444934;429538;429586;444915;448168;437893;423101;442073;450200;420347;420366;416334;450211;450198;406862;417494;417471;429080;429081;429089;420352;420359;420364;420365;450209;450203;450202;450201;450199;450210;450204;450206;450207;450208;450205;421652;436458;423364;424003;424078;424076;424394;439753;421550;424079;423820;444745;421408;432266;439777;432316;446079;419519;446343;432361;432341;446072;420816;445287;413589;413588;414461;432293;422111;443955;443853;444013;429776;429781;418419;439608;440405;442830;418418;420847;416757;418653;429806;429811;429816;418811;420445;418663;444495;418222;433408;448165;433118;433101;433405;432890;425997;425943;425964;425927;433237;433083;433099;433439;439290;439291;425963;425965;425944;425945;425893;426000;426005;426016;439364;439176;439292;439233;432894;433130;433227;433267;433432;433444;433379;425947;425937;433195;429133;429124;444247;441835;444203;419547;441913;420216;435418;421338;427371;438580;433737;421964;421958;441256;431080;442903;440203;440213;438481;438537;443498;441843;419514;428386;419512;419528;420088;443628;444336;438665;444334;433952;425286;439672;444364;416420;438579;438601;444357;443426;444402;444419;433944;438700;438719;444407;439571;443399;443637;441597;438358;442174;442537;440017;441643;442061;441317;443021;434024;443507;428749;448063;444446;444436;422537;447765;423570;423415;448493;437539;430467;448598;424025;423632;423365;444156;421885;423437;423360;430466;438501;433614;444151;449633;424160;423209;423232;423248;424525;417727;444081;444185;423355;423543;423430;449105;423545;434035;441657;442123;421864;425639;423459;448416;425483;425612;425571;444125;432935;432938;423867;423952;439172;433136;433167;433093;433084;439311;439668;433110;433145;439201;439151;433165;439206;439250;423460;423670;421945;423128;448101;433840;441898;423535;423451;419994;448254;449171;440586;443907;423928;422147;425140;440436;433538;439142;433587;425327;425423;425971;433751;433693;448178;443440;443464;433536;434027;433572;443588;438779;439433;440489;442799;439565;440576;439634;443919;442263;441195;440323;439481;438471;442336;443559;439591;440582;440753;439388;445330;433586;421940;415647;445246;418139;428928;417821;443416;443478;442075;443534;441222;440357;441180;423923;432373;448979;421847;433472;444346;433999;438682;441009;439221;426023;439366;433215;433166;433663;439175;449187;449212;433607;433588;423782;418720;423455;423666;445650;422099;445644;432274;446959;446039;446476;446486;432272;446926;446423;445754;445689;432185;445419;422069;423489;448391;448443;426649;422029;422034;442961;420772;439090;439284;439285;439266;439280;439286;433410;439215;425870;439323;421882;422033;446811;432187;418965;445703;423852;422148;433140;425244;438300;433861;442862;420777;441268;442894;442045;423380;432303;424534;424541;449019;445824;445705;432329;422155;423361;423205;423193;441479;448008;438605;433948;425956;435431;425879;425262;433205;433265;433707;433904;433907;433391;433717;444440;433206;439146;425953;425933;433395;445478;421866;448087;441171;433566;433517;438815;433342;444451;439127;438214;441013;448471;448473;448811;448490;418751;444144;444164;442532;443523;443552;443526;443017;443086;441349;443030;443010;441187;425532;425518;447994;432963;425548;425581;425514;425515;425522;425533;425536;425494;425497;425513;443375;441680;441234;441205;433278;449218;438920;438908;438900;438877;439031;448120;448145;449672;440968;420193;440991;444246;433334;438737;433926;433851;448148;44115



6;441628;425976;449316;449315;439330;426009;439309;433374;433247;449261;4  
26018;432480;443560;438475;444127;446271;443578;443971;439384;440352;4394  
95;440207;438296;440552;443090;439892;440069;441169;438535;433537;423363;  
442997;418749;449069;449051;449065;449072;449059;448285;449161;448297;448  
362;448326;449111;448351;448359;449168;448358;448292;448981;449061;448325  
;448371;449071;448377;448323;449060;449068;449063;449070;448982;449145;44  
8385;449008;449133;449005;449100;449119;439466;448383;448991;449081;44917  
5;420643;423818;423857;448706;448703;448606;419968;427128;427796;440038;4  
49828;427756;436462;420357;420360;420361;420363;420362;436455;436454;4364  
61;436460;422113;437458;437973;430578;433486;447531;425163;437674;444917;  
437035;429587;444897;420755;420756;434533;434535;445376;419664;436268;447  
512;436856;436391;436224;419659;419443;436386;436251;447493;436205;417954  
;416481;419725;445409;432260;425988;425985;433245;433386;439210;439342;43  
9355;439231;433079;433463;439171;433260;432213;448943;441401;422142;43638  
7;449193;422719;439035;448176;438999;433649;446210;436314;432226;424545;4  
19971;448290;423788;445371;447517;424553;424587;406799;417686;444835;4227  
83;425556;425430;438404;444983;417277;438047;438040;438058;438057;419669;  
437316;434460;445314;444988;444987;444984;439648;425954;445307;422118;439  
301;439170;439180;439262;433181;425806;429179;438097;429862;443240;437331  
;437335;427033;427319;428684;436252;423815;436367;424049;436297;425747;42  
5722;433280;433286;433858;444580;417957;418182;421177;421173;430721;44753  
2;438107;428682;445309;445261;420305;437887;420697;430801;447523;430799;4  
26926;426835;426924;433795;436366;421491;430800;436262;426923;418860;4304  
10;430075;417963;445355;420132;422671;434715;445364;430803;430804;438086;  
443743;428696;438108;444978;448307;449125;449046;449049;449045;449047;449  
040;449094;449041;449074;449050;449097;448340;448355;448366;448988;449075  
;449079;449044;449048;449073;449170;449054;448992;449107;448013;448308;44  
8225;448293;448288;449055;449053;444981;447533;445366;430090;421514;42968  
7;445265;414020;445183;422182;432294;422131;422345;436283;425716;449225;4  
38895;439092;439093;433108;439182;439202;432872;433135;433431;433384;4334  
29;436301;449227;439015;436290;420131;425741;433527;436390;428679;447477;  
423422;443954;425050;423423;425189;422944;447471;447472;447527;439780;446  
749;435391;430045;424672;418009;417967;436310;436336;436330;436365;436329  
;425203;421519;445305;428701;416489;436267;427321;427307;422939;442472;42  
2117;430553;430547;433882;433411;420241;439436;438324;442102;444347;44083  
9;440282;438710;417623;424583;424584;424500;424393;424508;424461;424483;4  
24414;424450;424605;424573;424576;417786;417703;417808;417809;417827;4175  
43;417573;417583;417588;417626;417634;417712;417755;424449;424593;424380;  
424392;424460;424419;424601;424512;424515;424516;424568;417790;417836;417  
549;417536;417678;417612;417630;417635;417636;417645;417633;417810;417680  
;424559;424571;424440;417650;424406;424407;424489;417613;417552;417542;41  
7741;424475;417537;424498;424575;417600;424511;424594;424588;424589;42458  
2;424554;424620;417745;417753;417739;417586;417676;424447;417709;417625;4  
17597;424474;424619;417774;417824;421754;441356;436376;423463;447515;4363  
69;444133;447759;422149;417978;439346;439293;439237;424481;445308;425750;  
424452;427606;417814;417639;417820;427323;429256;449251;421172;428694;421  
179;436063;417744;444976;437019;436990;444887;429325;419707;417010;417007  
;421180;435422;423288;422137;439907;444000;438474;440755;438293;439087;43  
3295;439508;442646;436272;439937;440166;430033;426075;446466;446207;44774  
7;447754;447781;447746;447745;418986;440397;422948;422791;445250;442897;4  
43053;418183;442706;440736;443855;440700;426738;428686;445248;422929;4453  
12;428681;445313;435423;435424;435425;435403;425864;439337;441916;432877;  
442043;444955;433174;433183;420158;433378;425187;442144;420227;419680;439  
154;428706;445326;442057;441296;440183;419677;420127;428708;445278;445324  
;422085;420260;417923;418410;422144;450109;445263;439155;427754;427741;42  
2491;422497;427724;439199;439218;439348;439349;439306;439216;439263;43920  
0;439245;439247;439264;433168;439217;432899;433615;438976;433547;425995;4  
45332;445320;425951;428705;421178;445323;445333;422090;444525;449255;4481

72;449219;439253;433186;444971;434657;447619;419861;425249;438268;438365;  
442074;439451;433976;434001;423573;421811;421810;424971;424881;424345;438  
105;417402;427728;427661;427666;443097;435420;416426;433419;432925;428703  
;421492;428709;425220;439259;425959;439332;439352;439365;429284;434355;43  
3335;421174;439441;417578;422418;438089;433580;420290;419854;419800;44925  
6;448153;449179;449208;449210;417609;419891;437224;419661;445252;447530;4  
39391;441326;443909;441161;443730;433098;433643;433609;433583;430718;4286  
95;428687;430481;436235;436317;436356;436287;436292;447397;447497;417956;  
444985;444982;443238;438073;438119;438050;438055;423026;436100;421175;438  
090;436378;436217;447485;447483;428680;424484;417647;444973;424233;428763  
;433121;433177;433096;439328;433132;433095;433462;439193;444980;423438;44  
4248;433800;438327;442256;442892;442305;442055;441560;443685;428690;43807  
2;447506;447478;447513;429315;422950;422955;422571;422770;422938;422943;4  
22756;422787;422957;425260;420248;428711;433418;425939;425868;438889;4257  
17;430720;445273;436245;447756;421470;421495;439945;420130;425729;421171;  
421176;433640;420126;419573;447474;426365;444977;420706;444975;448771;444  
979;434650;420795;419553;436466;430108;427314;427320;429135;444846;444680  
;436097;426846;426652;426847;444989;428884;447755;444986;430796;444972;42  
8878;428908;428915;448514;425199;421907;426636;419673;428689;447514;41515  
2;444974;436315;447488;429029;433621;445683;432379;419851;419991;419236;4  
19235;430101;430099;426840;426986;430100;427310;427311;414019;430072;4172  
36;418988;440887;425611;434837;434834;434893;434958;434877;445262;422634;  
442704;423743;422623;422688;423884;422737;440800;423708;444607;423800;423  
707;437300;424374;423146;423462;423580;423705;421655;423362;445176;436453  
;437472;422850;424876;447733;424495;425829;430037;417719;439478;430339;43  
7747;447731;447334;419548;449131;419877;419825;417312;443884;425482;42549  
1;419732;419937;420943;421250;421251;424455;413851;429670;417322;435281;4  
28730;430439;438961;438972;416336;425865;425869;420251;441711;433434;4259  
98;425999;425993;425730;425881;425882;425885;426002;426004;426006;415583;  
433198;428823;428465;413852;421224;422093;425863;422174;438875;438884;439  
020;424052;442792;423554;425849;418503;413580;413590;435282;416364;428459  
;410486;420378;424703;417591;417602;416401;416397;416405;421225;416907;43  
0444;430734;430735;430736;430742;402128;430016;421254;423395;423396;43788  
3;419790;448298;426801;423951;425385;439418;442841;440382;440057;440106;4  
18321;442468;441419;441430;441423;448942;441377;441364;441699;448918;4413  
63;441418;441406;441408;441415;441373;441765;425755;441421;441432;441771;  
441359;441425;441434;441435;441417;441426;441376;441369;441770;441361;441  
382;433329;441717;439656;433557;425584;439057;440898;422768;422774;412872  
;443947;440723;427149;427054;425554;439440;444009;424087;433862;425302;44  
7995;423338;443851;443719;442487;432724;432547;420239;426997;426974;42695  
9;447761;408488;416320;413880;416337;404227;416376;437621;435612;447107;4  
37623;423574;447093;411915;429036;415711;416425;414686;411957;420109;4284  
55;440403;433852;438529;439941;440384;440547;439968;440492;440261;439909;  
438361;440338;438514;439935;442915;443764;439613;424110;420954;420923;416  
416;432828;432542;419817;419231;426164;417792;418990;406800;420890;429034  
;406538;417313;435670;437882;424471;416390;416047;429853;416355;429852;41  
6374;416396;422877;408976;416474;416046;446317;432315;421259;443242;42616  
6;426169;413753;414692;416348;413857;416395;416399;416044;421252;408486;4  
04228;427779;440168;425657;425699;432614;441378;441355;441358;441670;4388  
24;425685;425693;408515;408514;420805;438460;440194;443982;440085;416329;  
443007;440617;425848;418441;418442;418502;418504;418506;418507;418508;418  
509;418510;418511;418512;418513;418514;418515;439066;433289;440730;414487  
;419227;428473;414510;413861;416367;413883;418267;418269;412862;413559;41  
3561;437056;436673;437051;437055;436674;436680;436678;437050;436676;43707  
9;436677;436681;436683;436675;437053;436679;437046;437049;436672;437054;4  
37048;427664;422410;425505;440503;432831;440649;441573;438489;439865;4386  
91;447984;440278;439533;438443;418304;415659;443821;443959;433714;436564;  
413607;417317;428342;435608;430791;430792;435609;428313;428298;428727;435

645;435637;417553;424396;417576;435627;435615;435641;435636;428267;436638  
;428274;428312;436620;413871;428302;435586;436050;435596;417325;403931;42  
8450;417318;417320;435639;421313;428306;417616;423050;428257;417321;43761  
4;437608;428343;436612;428279;436577;436605;436587;428323;428303;428333;4  
36591;436584;436594;436597;428287;436619;436578;428273;428309;428268;4282  
99;436568;436637;428308;436634;436636;436566;428264;428265;428266;428269;  
428270;428276;428277;428278;428281;428282;428283;428288;428289;428290;428  
292;428293;428297;428253;428304;428310;428311;428315;428318;428319;428321  
;428328;428329;428334;428336;428339;428340;444560;428295;428320;428330;42  
8325;421305;428258;436627;436628;428337;428728;434612;428324;428327;42827  
1;428305;428332;436640;428307;428317;428275;443255;436595;436609;436580;4  
36576;436604;436596;436583;436585;436572;436573;436593;436581;436608;4365  
92;436586;436575;436599;436588;436600;427418;442338;416389;419421;426955;  
429012;443239;421656;419508;432209;420969;422051;420960;422139;445756;446  
484;446497;446494;446282;445794;422077;419412;419420;442629;442637;418110  
;420994;420916;445452;418108;420917;421002;432325;419474;419499;422136;41  
8155;432291;415657;442718;442714;440660;422146;418163;418159;419409;44543  
9;418111;419435;422351;422350;422362;420970;422040;445719;418145;446183;4  
22121;419407;422066;422049;419429;422056;445862;415920;422089;432259;4209  
41;445489;420961;422106;422152;418151;422078;422346;420979;432350;420995;  
445721;446441;446762;432200;422028;422366;422153;422344;445938;446307;418  
136;418158;418156;419439;422364;418165;422363;422370;422087;421010;432323  
;422354;419491;422026;422163;422055;419472;432318;422104;432225;418144;44  
5496;445434;421009;418143;419422;419424;419418;445494;419498;432242;44570  
1;420937;432285;446043;432286;422050;420951;445671;418147;422039;420988;4  
32190;445591;445507;422360;422358;446137;422068;446280;446061;422021;4322  
48;432176;416033;445485;418117;446164;427124;422084;422052;422184;441431;  
423810;418137;426848;421826;421827;423811;444227;441695;433820;425635;433  
739;440018;433860;421006;422060;432387;432312;422059;423749;418691;442883  
;441037;423742;423787;439992;439610;443872;434032;440438;438356;418703;42  
3802;421784;418679;420915;448459;418694;414499;414506;414426;413488;41450  
8;425572;415495;435416;418800;421202;421206;425887;414505;419531;419533;4  
19534;417459;417461;417462;424643;424646;424651;427389;418625;425413;4404  
00;448956;447011;418633;437273;437274;424657;437245;426850;441615;424565;  
420356;424540;424509;424399;424549;424472;424499;424439;424612;424550;424  
502;417793;443949;420520;420488;425561;425614;440283;443956;443892;440301  
;442806;425991;441478;438574;438650;425530;433049;440994;440996;420765;42  
8959;445224;424874;424875;416488;447611;419889;440288;427665;437659;42927  
9;429373;429360;429420;429421;429427;444824;417412;427658;418409;438033;4  
43786;445678;444822;442070;432253;419745;430848;418329;437972;440124;4484  
67;429115;417958;419813;418328;449146;437937;438095;429426;423389;417759;  
437931;429448;437664;415531;419654;437266;442448;420184;422639;414509;437  
275;429780;420069;434471;447635;439562;423829;423366;429814;443859;440705  
;440734;440684;427396;448278;423819;433642;433813;425452;441153;440177;43  
8299;426963;439463;425277;449649;429583;429584;444864;419655;422701;45023  
5;440099;447328;414498;418987;442108;414497;421457;421461;415464;425134;4  
14504;414574;419662;418916;418627;420338;420339;438381;443233;435134;4351  
38;418799;431101;416387;416363;406533;413864;416361;413886;416359;412966;  
414511;428475;408669;413885;449009;413901;420640;417285;433819;414432;422  
660;415493;422675;414541;415494;422891;422883;422886;422884;422878;422874  
;415517;415519;415510;413573;422679;422690;422848;422857;425319;441075;42  
5563;445274;410301;411950;416340;411902;435671;420245;420280;436645;43666  
9;436642;436654;436650;436652;436663;436641;437074;436651;436661;436644;4  
36670;436662;437081;444023;436664;436659;436660;436666;436665;436658;4370  
75;436653;436647;436657;436643;436646;436656;437068;437071;436667;436671;  
436648;437073;437072;423890;426880;413865;447255;427408;420110;427420;417  
981;418959;418216;428691;428692;418265;434456;426362;421735;435111;419238  
;419234;419709;414600;414623;416477;415151;415503;418027;415660;445259;41

5658;415661;440967;422517;422648;422872;422803;425182;425183;420114;420119;417205;417206;445247;420115;417034;445260;425178;425180;416487;425179;425181;425184;425185;425186;425213;425217;419676;420112;420117;420122;420124;419679;419678;414579;419683;425196;419682;416484;420113;436382;425197;426647;440094;436214;436220;436335;429774;429743;429738;442782;440683;447734;427766;417961;437625;448824;428699;425744;425752;438844;439095;433518;449222;438849;433608;438783;425713;433525;438757;438766;425723;438879;433515;433591;428710;419927;426971;426715;419728;427792;426841;426825;426842;426666;427143;426732;426688;427144;426853;426634;427762;426852;426855;426952;430479;419995;419970;419986;419939;420036;436098;420524;430543;426856;426943;430584;427707;427797;427736;427747;427752;427793;427798;427701;427709;427713;427714;427786;427803;427691;427694;427670;427667;427806;427684;427807;427740;427671;427767;427765;427695;427710;427753;427755;427763;427746;427699;427745;442094;427685;427046;430542;426659;435048;418248;418249;416994;419233;418253;419240;436383;442076;444925;442876;419688;419687;416485;419690;414598;443746;443749;442641;443999;420116;420118;420123;423492;423483;434724;423352;420121;423859;423918;420120;428677;445258;445245;426675;427299;444990;438679;425219;427412;440445;427409;428452;409067;447608;428461;428444;413015;413014;408008;408009;428445;416358;416365;425177;418327;406594;406534;433222;425816;433303;433360;433522;449254;433581;433288;438860;433563;448139;433314;433567;433562;433633;433589;448205;449211;433283;448190;439081;448169;448151;433316;433576;433501;438868;433630;433539;433291;433529;448200;438827;433590;433565;425700;448121;448188;448187;433552;433281;433550;433371;439103;433357;433339;433359;433307;433330;433341;433358;425762;448185;438763;425728;439070;433305;433638;433511;433338;448118;433551;433346;425792;425745;413868;416369;437329;427410;429001;422017;432257;439709;438297;424108;418319;425498;425480;420206;420163;420284;420185;420230;420175;418670;423876;414043;415148;438458;413693;417178;420151;437067;437082;437066;437063;428460;447914;424359;430440;414044;414042;414040;437191;429007;428446;433187;439239;439240;433204;433420;433387;427801;425701;425715;425978;439297;439315;439361;439335;439363;439194;439242;425942;433208;439018;425726;439045;433086;425979;433356;438901;433344;433362;433549;432869;439067;421691;441370;427027;417263;416353;416380;416393;416394;416384;440740;424088;423690;428488;428489;416404;421226;421227;421229;421231;421232;421233;407313;417604;417628;417627;417649;440501;440515;438534;424607;424581;424577;424017;424018;439923;423359;423486;423639;418302;448413;417286;440226;418309;443980;420683;423069;423494;418307;420942;432326;418000;425463;443225;438914;418696;422171;423786;423910;421887;418700;416738;417239;423942;440764;440656;423877;424117;432965;433034;432799;425496;420198;448395;448409;420160;432900;425486;416739;423546;418084;422359;418105;416024;422172;418106;418092;422187;420929;422053;422178;426429;424062;423959;417667;418315;425632;413894;442398;425466;425477;425495;439677;425638;425510;425471;425517;425488;417666;411952;429102;429077;429097;421258;429086;421257;429085;429098;406531;416321;429074;429088;429078;429096;414687;403936;403937;429101;429076;429100;429104;429105;408010;447621;428829;420101;402129;434694;417276;449327;448136;425818;440511;433574;438926;425786;425721;425733;433284;425880;433214;417335;413582;414462;414467;422918;414563;424538;403963;447910;435621;418991;425594;413878;430441;413879;447916;446067;416370;416379;444575;417329;437958;435594;422428;416362;406970;402132;447767;420108;420105;407079;425872;433423;403962;412899;420102;420103;420106;434693;416829;416866;407987;410537;430443;422429;420642;412026;428469;419554;435587;435580;437190;422349;437976;421654;402123;413613;443953;420789;410218;406973;429103;419432;413902;413898;413893;420111;421228;421230;419228;428474;435649;435654;435650;435634;441767;433657;406716;406717;402121;434534;411955;412898;402127;411927;413615;418379;447253;403928;413610;413614;413618;413620;413621;413608;414479;414481;420790;413616;402119;402124;411953;408479;434564;417064;434563;403930;421253;413692;413694;402130;408431;419701;429006;444068;429239;4

43200;443211;443228;443221;418675;440032;419807;443206;447909;443201;437087;437045;436655;437085;444025;437059;437064;437065;437084;444024;437076;437083;437088;437060;437061;437047;444026;437044;437077;437189;435142;437192;443222;443226;443224;402125;447257;429140;430297;447728;447729;447695;447704;447712;447717;447684;447683;447685;447886;403934;406595;447696;435127;414041;437651;444909;444849;429328;429542;437041;402120;406798;417319;403929;410719;428468;428467;428478;416398;416324;406536;406535;413522;429079;444273;416356;412967;408670;411066;410531;410532;441403;428477;423586;435601;437618;450196;410044;413619;448143;417880;447629;447630;447632;447631;447627;447628;424542;422630;422806;426307;438078;436389;413568;414458;414547;415513;415521;414542;414544;414536;415509;415506;415508;415524;415501;415500;422893;422717;422654;422887;422749;422746;422919;422819;422661;422716;422842;422715;422641;422672;422728;422689;422835;422837;422840;422843;422868;422871;422894;422801;422805;422811;425476;425057;419259;425059;425048;425058;425060;425061;425056;425474;429295;434349;434845;438032;415522;418411;433282;422824;422802;422779;422875;414589;428883;426427;418808;422681;437947;417264;413564;440553;425802;425324;425054;425662;425805;422622;414551;422720;422730;422742;422762;422873;422889;437687;444828;439117;425819;414500;440135;416740;425796;425810;417211;420168;415504;418026;421459;417261;445329;421891;422881;413577;413583;415489;415507;424379;443193;417283;415479;422638;413558;428451;422631;422767;422882;422827;422645;422676;422677;422888;422761;414452;415505;420944;422116;418148;414537;414539;422596;422904;414543;422581;440087;443961;435133;419835;416624;416603;416619;416565;416613;416625;416602;416598;416582;416610;416587;413459;412969;423539;416604;434562;413617;413609;416574;416577;416605;416342;416371;414485;420796;416591;418994;416594;416596;416609;416600;416611;416627;416590;416630;437057;416571;416593;416601;413899;444946;416583;416621;416566;412968;424051;421235;421236;416581;416629;416572;416573;416575;416576;416580;416606;416634;416586;416595;416614;416612;416597;419211;416632;416626;416569;416592;416579;416631;416589;416617;416622;420889;416354;411218;408430;410984;414484;407988;408481;435081;436440;435097;435092;435096;426754;419926;438139;438138;419884;427049;437582;447849;419932;426956;430471;427048;419878;434297;450214;435080;435083;447848;437442;437444;436444;436437;422407;447852;447559;435088;427398;426418;418375;427045;436452;435663;434555;447921;447557;447562;447582;447560;447580;447576;447574;447861;447864;447865;447563;419761;447578;436428;447564;419946;443188;435676;436435;435677;436421;436414;428826;447860;435082;436432;436417;447577;447569;428849;428833;428848;443192;443245;435682;435681;435691;435685;428837;428835;428832;428838;428840;443244;426882;443190;435683;419771;436451;447859;436433;437438;447862;447570;435689;435692;435696;435693;435694;435690;435688;435687;426379;435684;435680;430654;430476;435679;417917;417918;435678;435686;443247;428842;443212;436448;436422;436449;436426;436424;447857;435093;428845;443248;435695;428836;443213;428850;428834;443246;443216;428839;428846;443241;443227;422434;422435;422433;428844;428847;428843;428841;447561;436445;436431;435091;435090;436425;447855;447581;431103;436430;435112;435094;427744;427757;427759;427705;427750;447579;447573;435098;447863;447847;447575;447567;447854;437453;437454;436418;435074;436450;447571;436419;447858;447856;447566;447850;447556;444998;431783;431784;426973;418376;417033;443232;429062;445000;434558;447585;447584;447586;447572;416706;416449;443237;427662;434952;417400;427305;427751;427706;417388;417401;417403;427733;416432;427659;417396;419969;443203;428856;448412;436689;426767;426700;447583;436429;436436;447558;436415;443195;447568;443191;429807;429882;429884;435100;436420;435099;436447;435087;435095;443187;435674;435675;447622;444999;447665;435085;435084;421573;435078;435086;447565;447851;447853;448701;427415;420005;417444;435045;435103;435101;435102;435105;435104;413595;413598;427644;413597;421670;424363;421672;421669;421665;421671;435120;426944;424301;435122;426930;449941;449965;416541;445109;424361;416458;421667;421664;421662;421663;435106;415644;429335;413213;417387;

416412;416543;427106;418381;418383;417484;437306;437312;437314;437318;429868;437323;437322;437324;437584;428722;429865;429872;419985;426810;426743;426941;426870;426742;426709;426931;420004;436119;430689;419930;419955;426874;426873;430538;430539;430577;430500;430576;430619;430693;427025;427134;427133;430682;430683;430684;430681;430680;419965;426978;426975;426976;419780;419808;419749;419784;414008;417238;419692;413896;428670;415581;418824;413490;422644;414591;413600;412975;428713;435126;414558;435135;418324;425130;437512;442044;421260;421261;421262;418325;418326;418322;418323;412981;424366;417384;417385;414414;416331;416332;421668;447252;415743;417521;417519;444274;415742;417520;415741;435139;435131;430847;416542;447019;447025;429175;437307;420142;434565;434566;408482;418832;427029;423067;437320;437319;437321;437334;417524;426630;417523;428230;422413;437325;437327;414520;414522;414476;421666;416373;416382;416406;416407;424280;437827;420539;417406;419753;417391;417383;417392;417389;427773;417398;413599;427649;427645;427646;427650;417393;413214;417386;427654;427655;427085;435121;442523;416618;414501;408978;440088;416633;416620;414571;412030;416628;416585;414480;416570;414482;434569;434570;435283;416578;419832;427416;428466;416599;416615;416567;416584;419735;415539;413611;413612;443844;421787;413622;416607;416608;413606;414483;419831;414430;438084;425843;425850;425856;41798;442380;414009;437521;437523;418891;424255;418080;427167;424224;426107;420794;419558;417483;438798;440275;432630;432786;432746;432551;420255;434013;425441;438368;441225;418676;434173;439991;440420;420541;420766;418243;445356;422580;422781;422045;418734;421880;421943;423534;427001;430596;430679;420537;427680;446646;445405;445413;418707;438428;442982;439494;441039;444086;449650;419842;423118;417254;440592;441148;440387;441789;443702;425502;444079;444230;440181;425406;440422;423610;434720;438064;441213;444103;444112;425457;441700;441774;433728;425682;433821;426792;448300;423795;422653;419866;430032;442625;438411;422685;421358;421357;421359;439545;434475;430015;450017;442993;438419;450186;431082;428757;440310;448453;448555;448512;432269;440321;429997;430014;438485;425343;440667;438309;420247;433442;433216;435317;448461;448789;428897;437967;426776;419918;426685;426706;426779;426781;426788;419973;427668;427687;427082;420016;419996;426651;426653;430653;420017;427140;443653;442216;440122;441099;425377;438282;427028;422177;423426;419873;423112;423210;438626;432988;442900;441735;448650;445459;442060;432270;423695;423757;436102;449645;418669;423813;419399;423393;439527;423814;441112;424019;423259;420246;442769;442699;413603;413025;424027;423793;423736;423452;423059;419890;417926;429692;426696;426692;426765;441367;420182;420195;438083;422772;422750;421910;421911;417405;427800;427651;420306;431014;424346;431016;437798;437799;437796;426464;426459;437797;426502;440373;448679;448477;420256;420259;432990;425562;432951;427811;427813;427809;420799;420800;420801;419555;427810;412974;420136;420135;424369;417488;417486;417487;436246;436379;428697;416480;415641;415643;416503;416507;410545;430719;410546;419675;447267;418025;445249;436219;419237;424352;413870;427393;426629;440252;448821;439895;432861;419990;419843;427734;427690;427702;427703;427660;427704;417399;419794;417267;433000;417269;426637;417268;419791;420374;425595;432529;425481;420291;420252;432487;420285;426638;419992;423350;425501;425475;425731;425648;433348;415709;429682;419792;425576;439535;419793;419898;417584;424544;425878;424037;424035;419797;419798;424159;442222;424137;442905;423249;449719;418713;438502;423775;432579;423645;423899;425261;423085;423982;432970;423631;439426;423744;423770;423649;440231;423657;435698;420990;435109;418764;424435;440340;425296;449707;425325;433972;439454;440433;423794;423235;421845;423935;444435;423846;423898;419743;419759;419729;419721;419737;419740;448000;418706;421794;423160;423161;423152;423840;418755;421795;425436;438536;438486;423999;418711;423214;433829;425587;425316;425424;425492;425266;418582;43392;420211;439148;425659;415630;425676;425766;425770;423170;423321;423592;423832;414006;414007;414005;412116;423130;440152;440143;434481;423773;426817;441366;423233;418715;423938;423740;423491;423778;441031;440988;444191

;444153;433973;443011;438520;439931;441555;440307;440365;425896;440951;418680;437906;437888;449632;424557;420228;449124;433743;421789;425894;442133;442244;443096;441640;439643;442610;443050;440431;441559;441242;438480;422170;423789;440053;438370;440146;441119;423405;423559;427397;420694;438344;418320;438467;443997;441162;433676;443585;433965;439062;420189;440329;423204;423825;425298;422352;432231;420928;440790;443776;425642;423371;440305;422072;419913;440364;418288;418290;418297;418292;418301;418295;420282;418300;418298;418299;418286;418287;418289;418291;418293;418296;418294;418308;420177;419868;419869;425675;448129;440518;437272;420482;423268;443549;423303;444268;422009;423174;423672;423457;423461;418677;423178;421834;423550;423828;421947;421919;420670;423465;423324;423831;422010;418678;421923;421916;421917;432289;423134;440393;423845;421865;420249;420276;432713;420275;420272;420271;420273;420274;442001;420263;420277;420232;426980;426832;426989;420974;439888;427063;440103;443990;422002;423250;420728;417282;423231;433808;439596;437359;437231;437254;420903;423991;423123;423122;425702;423110;440179;434466;423467;424024;417950;434459;434462;437910;423808;421816;423149;441420;423841;422108;432320;417439;423372;415128;423242;422135;445481;423824;439375;421805;421909;425293;438349;439587;439519;442091;423887;417314;417315;438310;417213;423711;444080;438588;438600;439400;432979;438260;439520;439459;438333;418692;418742;448182;433893;433827;423228;420174;448887;442489;420269;420231;420222;420235;440037;443739;421802;423266;440361;449130;433824;422169;432382;443770;440243;440232;440761;418672;442413;423339;443996;443885;442696;442752;443758;440100;440070;442648;443963;440726;440751;440093;433859;443788;438624;443481;441175;438413;441062;441144;418021;418020;421446;447699;447654;447676;447693;447706;447662;447713;448551;418698;420746;418688;430646;440998;423469;418737;423111;441414;430852;448817;448822;418405;441368;445895;419552;422667;417394;422368;448709;448738;423156;421877;423356;423357;425238;423255;439447;433781;441115;443460;443457;434002;438620;439863;439645;442973;438279;443640;438733;439635;433722;438507;441800;442578;439621;443395;423817;423098;440558;423648;419427;439631;440076;440097;440187;440219;433837;439987;440344;419386;423109;423215;423998;423731;442247;438288;440395;440401;438499;438400;441802;440045;441178;438504;440568;441259;443740;442103;443572;441124;425425;423765;423504;423078;423953;420735;440421;440417;418718;423227;424000;424001;418716;446040;422063;441561;443015;440202;442528;443453;439877;423081;417659;418739;423066;423762;424188;434516;432942;423385;423990;423238;440970;423629;438509;420731;425362;441302;440347;443833;417410;440125;427776;427720;440302;427729;427770;427790;423076;432249;432212;423414;420718;441742;414639;440121;424555;417409;439872;427805;419883;419882;415478;426641;448966;420720;421888;423791;423045;423812;425330;432306;441283;439975;443496;443709;443793;437375;437367;441813;422347;422369;438269;439973;439980;441762;442860;440571;440597;439638;441074;443928;420191;440030;443798;423269;423113;423444;441103;442926;439485;421842;439385;423351;438429;423626;417262;438321;440311;440132;444018;433746;421771;448637;448755;424879;418858;438230;434691;417498;417475;420298;418977;426027;426038;426322;425630;423723;435108;433279;432184;432214;422091;432369;420982;423126;422125;439152;444102;449298;433732;444416;425267;433784;433748;421283;439188;433376;433687;448402;441869;425950;425549;432588;442996;420292;433240;433497;439503;442048;425504;426001;433421;423727;438225;423148;423158;419406;422058;422019;417270;437892;437884;423084;421867;423052;423253;423251;423151;421875;441755;424006;424007;423373;435316;420748;423509;420747;423194;421915;421914;420878;423926;448617;445351;423758;421806;423136;448519;423432;420437;420422;420438;436049;436052;436053;436054;421614;421616;421613;450063;413019;422845;440081;444021;441172;440428;438276;440480;440487;440510;443964;439465;440345;425647;439065;418982;434783;439623;442194;433801;425370;440042;440091;440115;443882;423529;418005;414011;439196;442220;415142;421962;419569;417528;423447;427609;427577;427599;427615;427543;419697;427505;444786;430327;427484;444613;428777;443207;423735;44899

6;415491;425667;418314;444244;422820;422910;422807;422603;422604;422607;4  
14531;414532;422804;415512;415492;419876;421883;417554;419786;419776;4198  
48;418432;421711;419765;422833;417540;417545;417601;417603;424480;424548;  
417801;417541;422776;438784;419849;426751;418709;418685;424021;423258;436  
200;424192;433817;418149;425289;433900;438599;414529;414534;422949;423803  
;425350;440004;417346;449163;449158;449028;448227;449153;449149;449122;42  
7718;448361;427600;424618;417696;417771;417568;424558;417548;424518;42456  
4;424520;417653;424438;424556;424445;424470;417544;417750;424381;424624;4  
24492;424401;424437;424448;424599;424519;424522;424523;424524;417716;4178  
38;417864;424441;424427;424446;424382;424482;424493;424596;417772;417557;  
424606;424521;417607;417558;420743;423516;422522;415484;437243;422808;415  
527;422905;422869;422839;419521;428376;422606;422587;422627;421301;439120  
;425732;425734;425772;438845;425727;425736;425773;425774;425776;433647;42  
2097;432223;448350;425451;433896;433806;433843;444415;433962;440359;44837  
5;444361;433478;442214;441083;439902;438378;440185;440246;425341;425308;4  
25317;424009;449021;449015;417522;417246;433228;432334;423062;423173;4277  
12;423611;418722;417975;445674;445412;445408;446794;419773;416515;416516;  
415470;421425;421633;450136;422673;438896;413016;422736;422684;422834;422  
816;422818;422821;450059;422765;443742;432675;422734;439431;433747;438372  
;443626;443335;423676;440376;425294;417300;438316;432351;424104;430939;42  
2832;427161;450023;418060;437587;448352;426024;425813;433323;425754;42577  
5;448201;438842;433595;433308;433321;433561;425677;434483;422809;445453;4  
15486;414468;422726;433234;433250;425922;425867;425255;441416;438928;4390  
85;439048;425707;432870;425669;425737;425708;439140;425768;425696;425689;  
425852;439116;425851;439046;448967;425668;439049;426013;426014;425968;425  
949;425892;439082;421221;437895;434485;420692;422353;438531;433942;423379  
;423734;419658;442276;443094;449329;425489;425290;425053;418583;425764;42  
6957;445303;423779;440052;445454;432346;432221;446340;432365;446270;42211  
5;432228;423131;423091;418687;418686;417931;450233;447658;419928;417292;4  
39446;420104;427119;424551;424560;423057;442676;432385;425711;448012;4255  
51;430000;430011;425382;444421;438672;429995;432250;423075;443410;444215;  
419903;419961;422071;448532;417290;417291;440123;446649;448818;419566;427  
541;423769;414546;421433;444393;447423;447271;447319;447324;447265;414451  
;426964;422114;420976;437909;420729;423047;421938;421939;417660;417621;41  
7590;417699;424503;424507;424473;424514;417822;417580;424592;424533;41761  
1;417655;417825;424853;422865;428831;422409;423068;430186;417574;417280;4  
16646;428940;417025;424641;417017;427711;425473;440670;425523;440711;4255  
86;425588;443445;440611;440259;439932;439982;441198;448444;425537;425633;  
425557;425535;433002;416733;420237;445318;441064;439644;423940;417289;432  
218;432331;439091;439810;445723;432301;445725;445654;448977;421918;432262  
;446167;432314;445458;419425;419496;417501;417478;449128;415631;443935;43  
9967;422156;420013;419744;448657;416723;419723;418303;441006;417671;42312  
1;419722;419803;441409;441429;420693;440516;423358;437611;417732;417668;4  
17670;427725;427723;422382;438515;427663;416675;417408;448612;448739;4485  
50;437303;414013;442090;416032;420371;420375;420369;447596;417008;417009;  
422725;420392;420387;417672;436076;418969;424913;428673;436064;420403;410  
715;410536;410716;411951;406036;411220;410720;411219;406596;406597;416400  
;418805;434560;416314;412029;414527;414569;414528;417181;419246;418815;41  
7187;417188;419214;419215;419219;419221;419232;419245;419247;419250;41451  
7;414519;417193;419216;417197;410713;411929;428442;425117;419217;416325;4  
19224;437622;428464;449487;410714;417185;414567;413877;419222;408977;4163  
49;416410;421234;413863;421256;413017;413018;437619;447915;416411;437617;  
428454;430740;430729;418992;437624;447917;428472;406031;427414;419226;427  
417;427643;413596;413594;427717;421222;445745;435662;447447;447919;437203  
;447691;426680;449103;423792;425845;422130;425821;437197;437198;437201;44  
7669;417502;417479;419950;419949;419905;426650;426420;420152;432181;43218  
0;439281;439283;433449;440878;439326;439351;433148;439150;439278;433388;4  
33461;439162;439225;433116;433154;433153;439174;439198;433120;425815;4331



50;439178;433440;433453;439322;439303;433143;433169;433078;433081;433415;  
433452;433454;433459;433184;433162;439344;433091;439261;433115;448102;448  
090;448086;447988;443466;439575;433377;439227;433149;432891;439258;439197  
;439255;439161;439305;439189;433077;432892;433125;433188;439251;439241;43  
3178;426021;439310;439317;433133;439173;438359;439331;439324;439219;43923  
8;439666;449319;449321;449323;425877;439307;439308;439183;439144;439145;4  
39147;439207;439213;437011;439671;439665;432898;432885;432868;432873;4331  
96;433129;433155;433223;433236;433242;433255;433257;433262;433261;433070;  
433072;433080;433085;433401;433412;433425;433436;433390;433396;433399;433  
380;433446;442886;433413;433164;433447;433182;439254;433173;433075;449312  
;439333;439347;439234;439235;449318;439319;439338;439312;432813;425919;44  
9322;433147;421460;417777;417798;447816;441020;447907;445767;432283;42921  
0;437568;445118;450190;417869;429218;429219;450239;429004;437575;449674;4  
44175;447906;432539;448218;449248;441333;443616;443029;442649;442700;4427  
73;441043;444221;448561;422062;435474;419820;429197;437572;437580;439248;  
439316;439327;422753;422796;445385;422074;437571;419804;417766;426962;418  
391;417770;429725;446920;422162;437752;432282;445349;429690;430814;430815  
;430817;430793;444626;445369;436853;427296;445370;427302;427298;427294;42  
7295;427304;429698;427303;427297;418371;445373;445352;445362;425171;42829  
4;425373;445367;434803;437806;427131;426899;415457;429203;415454;423428;4  
29688;427731;429676;415700;444216;425825;426580;413574;416743;436731;4367  
25;436727;430649;425822;420343;426883;426890;427352;421212;424415;433855;  
442969;442200;438690;444105;449685;440965;441014;433742;432310;437686;437  
688;441871;444286;433238;425996;433229;433246;433253;433771;425987;433381  
;432883;448216;422854;434007;433870;432788;448909;434954;439682;439724;43  
9720;439721;439683;424630;433734;425440;433783;425428;439807;433484;43861  
9;447983;447990;420323;438319;424569;438363;428481;428482;428480;428485;4  
34725;433689;442864;442277;438355;439681;420583;448577;441797;443470;4428  
14;425281;442097;439876;420567;438658;439528;440034;443114;438541;442874;  
439534;444291;440573;440285;442190;439372;442762;443774;442184;441552;440  
072;444328;433890;448114;438577;433470;442920;441760;441678;439981;442832  
;442535;439875;439604;440608;442526;439492;440267;440239;442139;440077;43  
8492;440022;440108;440268;443020;442124;447798;416676;429235;420565;42923  
6;429231;429232;436724;422404;436719;420568;448037;438385;425353;438468;4  
38416;439470;425640;418311;441752;439589;440560;442809;439628;444007;4384  
82;438292;425679;433842;425283;433233;439905;433934;433888;448033;438667;  
438678;448107;439684;433651;422793;442974;443384;440111;443467;439997;439  
399;443084;433735;433833;433971;425891;433467;438571;433864;433483;448420  
;448438;448015;438736;420569;428917;419886;438684;447779;448001;443386;44  
3074;439393;435155;418580;432358;443429;441564;441305;440621;440853;42685  
8;430074;422426;423434;429172;423043;423039;447015;417427;425925;425952;4  
16730;418548;429308;429473;429499;433636;433658;437000;425916;448161;4164  
67;416468;416475;416476;420314;420321;420444;420446;420448;437519;432277;  
448196;417242;438098;424080;420737;418802;437246;440250;440506;438100;437  
244;414014;417817;417734;417829;418270;440298;417702;438111;438046;437210  
;438068;438054;417868;450197;419925;426721;423392;438030;438109;438093;42  
0350;420354;438060;438076;440189;438080;437953;423473;415702;437282;43722  
5;437283;437961;438061;439722;429459;444834;444825;427697;418516;420566;4  
29683;416746;429564;423783;448619;448734;432961;420200;417781;417738;4203  
17;420453;420454;442308;440304;443398;432859;418306;437285;417235;422838;  
422810;422760;422766;414552;414564;422576;422659;422674;422583;422593;422  
721;422797;422812;422823;422825;422898;422798;422799;422588;422657;433417  
;413584;415496;415463;414433;414423;414439;414446;415514;415523;415529;41  
5533;415502;414435;417295;414643;417230;440541;435723;417684;417769;41784  
0;417688;417794;415483;415467;425777;418983;437204;437251;437250;437247;4  
37230;420902;437248;420899;415498;414429;417828;417834;417644;440551;4178  
70;417767;417862;445427;448530;448779;448533;448500;428862;428869;428872;  
429117;428865;428866;428867;444727;413647;437963;437218;415475;416479;417

287;422134;432265;419962;447595;438045;438120;438122;438123;438121;438124  
;438128;438125;438127;438099;438126;438117;438087;438066;438012;438063;43  
8039;417681;422591;422785;422784;417756;429677;437679;444939;425961;41548  
2;417728;417859;429685;417867;417852;417757;417795;417714;424410;417802;4  
17713;417679;424434;424433;424468;424384;424476;424412;424423;424426;4245  
27;424595;424411;424443;424580;417632;424467;424536;417566;417876;417785;  
417250;414641;414554;425767;429410;415468;415511;415530;415497;414565;418  
729;417747;417861;417252;417293;417232;427003;417863;444084;425656;422561  
;413604;417986;450237;429038;437277;425228;426886;426885;426891;426581;43  
0111;417278;424038;440295;448511;448784;417234;417256;422595;432716;42579  
5;441665;439401;439598;440178;440491;440494;440532;440539;414556;413571;4  
14464;414448;414469;414434;414424;414438;414440;414444;414442;423835;4288  
25;424031;417279;414471;414566;414449;414454;414463;425847;417343;438883;  
424257;417014;447657;420065;420066;414560;414557;414545;414561;414562;422  
698;422699;422647;422651;422666;422915;422852;422815;422817;422771;440214  
;415471;414436;414425;414507;417860;433956;448936;425756;425672;429518;42  
5800;426011;425688;425660;438764;417800;417815;425665;417571;417575;41766  
2;419671;417426;417429;414017;416028;417272;436718;418863;441155;434616;4  
34618;434627;434628;434617;434619;434626;434620;434629;434630;434635;4496  
54;419944;443267;418089;418088;428881;432541;420262;420215;432502;420217;  
432519;420154;421275;428910;436686;430808;448445;430809;448718;441086;433  
868;426626;445761;417265;417307;438561;422748;429523;443404;443105;420723  
;417642;424510;417643;437939;435413;417581;429116;444172;444173;426914;42  
1003;420849;443062;444206;440980;426662;427080;435315;423472;440952;44168  
1;439933;442545;444016;425443;439382;442820;438323;441595;439585;439379;4  
40590;425300;443446;447973;440208;425242;438401;438565;438745;440593;4338  
56;438703;438748;437879;441412;432302;441867;448399;441890;441896;420914;  
418087;444220;418091;444417;438394;443009;418094;423104;439557;416140;437  
346;425248;448014;447978;444363;444360;437663;442032;441313;448047;444452  
;438567;422682;448400;448401;441870;448417;448389;448405;427739;429273;44  
3663;441312;438562;441894;448106;448024;448100;447960;438708;443602;43081  
1;430812;440222;418389;445350;445374;445375;424121;434538;437970;423071;4  
22186;441152;435114;442319;441669;441605;443600;439567;442080;439501;4404  
13;438291;415656;442607;441137;438457;441845;438388;441196;438375;441245;  
438441;444337;413556;433710;446493;448601;448608;441404;425743;433507;439  
930;444199;439706;440170;439076;440867;448144;432273;423177;417538;428874  
;428887;428889;428891;437268;437284;440923;439704;442764;420186;432295;42  
2355;449258;440694;440640;440717;440765;440781;443832;425695;438912;43897  
7;438915;448568;432216;432237;432230;424054;418770;423219;444283;422365;4  
38396;419442;442689;449194;447939;420234;432837;432712;432804;420261;4202  
64;420278;420240;420244;420166;420181;420267;420204;420209;418310;420283;  
420281;420288;420286;420266;441955;448105;443041;417783;417539;424126;444  
280;444281;444293;432549;442481;425575;432967;433798;420213;420199;425761  
;449679;440061;443575;443899;439479;441733;443828;443942;443644;443906;44  
3796;442810;440006;443790;440704;440264;442478;443819;443789;443970;44354  
6;433493;438666;444351;448130;439371;442999;439998;441658;425742;439052;4  
32722;441885;432706;432691;439181;449313;439313;439343;439204;433069;4333  
97;439168;424119;417585;445849;445850;446461;422180;427159;446206;445632;  
448542;448449;448454;448456;448516;448582;448814;423100;448525;448455;448  
460;448521;448825;448816;423175;422094;449325;449328;449324;425904;425888  
;425889;420977;446498;445567;432378;422167;440653;438305;432222;445637;44  
6288;445639;445545;445766;446887;446217;432251;432241;445760;445638;44578  
2;432345;421824;421825;421831;423495;425368;420393;420400;420402;420408;4  
27037;423500;423499;423417;423561;444168;420208;438550;447967;425264;4333  
04;433326;433194;425250;432893;448132;425426;449326;439511;433835;432742;  
448046;444292;421203;434939;448548;426704;444760;448736;448722;448676;448  
593;448620;448765;448686;448691;448688;448646;448630;448702;448745;448758  
;448735;448652;448682;448685;448694;448717;448746;448754;448763;448772;44

8658;448626;448566;448613;448667;448697;448634;448733;448590;448556;448571;448766;448712;448659;448614;448580;448610;448747;427674;427719;433919;429864;446788;429993;448077;425844;427784;427788;444384;442089;447989;429873;418367;439437;427771;444109;418368;430080;430078;430092;430094;430098;430093;430079;430068;430095;430097;430081;430082;427815;427328;427324;430085;430077;430083;430076;430102;430087;430086;430069;427325;430067;427333;430073;430096;427317;427329;427318;427331;427330;427326;427316;427327;427332;427335;427334;427336;420336;420315;420319;420340;416997;424636;417012;420333;447620;448713;448492;420176;449022;420164;449173;436342;448939;440029;419689;442795;420155;432510;420265;432867;448908;420279;420180;419879;448980;432317;448270;449155;448365;449039;449062;448245;421957;426988;425214;416142;448331;448247;448268;448261;449034;449092;449025;448985;448387;448380;449144;448266;448322;448253;448246;448277;448234;449096;449091;449093;448312;448240;448338;448272;435070;419921;419923;447832;416430;420587;448654;420000;423410;420767;449110;437590;421692;431117;448781;442134;441648;448802;441127;449077;448342;449089;449056;449010;449099;433809;432388;432363;446130;422138;449035;433510;443581;433508;430638;423420;420855;425824;420464;441157;443372;443682;443045;448962;423097;423488;421836;421837;423157;448223;432344;423502;423503;423448;441734;443968;442735;442680;442340;440747;442636;440999;444190;444207;449680;444245;449629;449668;433949;433815;433886;442719;433736;449663;449665;449690;441041;444211;423096;420734;422001;423587;439034;439625;416737;418259;449712;449713;438044;438085;438020;438053;438052;438051;438104;438006;438025;437993;438019;438018;438069;438004;438007;438008;438003;438014;437994;438016;438022;438005;438041;438024;438023;437995;438017;419656;438074;438021;438027;438071;438015;438049;438059;438010;438075;437998;438038;437996;437997;438011;438013;438031;419556;419557;450153;434998;434865;448684;449037;433963;432836;430854;429122;429125;429120;419265;415158;416471;416472;420330;420331;418984;420326;425367;420346;420349;420355;420345;420348;437908;435144;447679;420268;448462;448553;447969;433684;448585;437999;418397;420318;448783;442569;447833;430007;420167;420220;441991;442354;420165;418316;432766;418318;432734;420173;420162;420172;442438;432753;432533;442013;442510;420202;420219;420224;420171;420178;420188;442404;448881;448494;449658;437236;414023;415459;437897;421481;421487;450192;430797;430805;442798;433669;444236;444260;444449;447985;438500;434457;446335;433910;433779;444320;433480;433847;433897;433789;433481;433492;433909;438558;433920;434047;435148;435151;435150;435152;429696;429691;429694;442584;430012;448846;438374;439373;440635;443922;440759;440763;429991;429994;429999;430003;430009;417407;417191;417196;429697;429701;437271;427781;449066;448311;448360;448321;448341;450167;430413;417933;450232;420741;427647;427648;427652;427653;439084;444208;415157;443489;417004;441228;439056;418655;420332;433600;420335;420337;420341;426642;419875;419841;427735;429559;445675;432229;432247;420946;442765;433918;439532;441055;432364;422183;420686;420687;425235;433681;427096;441690;443415;427117;422032;442758;440784;448263;445687;448250;432227;421830;418733;445866;446434;437551;425986;440894;430002;430004;433797;437094;429230;417547;435543;448689;448674;448700;419945;419718;439514;433757;438625;433495;433485;433491;426694;426851;419934;438511;443220;429228;422023;425348;440380;442324;442117;442754;418305;442291;419801;426643;448801;445737;448546;420043;442318;433745;413579;413587;419301;419303;424082;440519;419530;417458;425839;425799;424084;437969;437952;447594;430945;420952;423442;448041;438689;448019;438705;433928;433937;433226;422608;418813;447643;423973;444241;445361;421800;445980;432339;445696;439220;437297;439098;442639;421828;434458;434463;434465;434470;434472;434476;434477;434478;434479;434482;434484;434486;447834;434480;447644;437959;445708;432335;432998;441021;441662;439432;433939;443608;440930;440897;439793;439710;439673;425276;441882;441360;423464;448039;423547;449688;444223;448330;448346;448987;449164;448995;448335;448332;448329;441024;446301;445406;446923;432372;445448;445564;432263;432337;432336;432349;444116;419310;421455;419302;4

19305;419309;416697;424629;420129;421448;421452;421453;421486;425234;433142;421807;438664;438713;438746;438709;420023;441428;420002;441397;440993;441023;443408;441410;447519;421790;448974;443925;433787;432246;441424;447637;421471;421462;421469;421488;421468;420344;449644;449651;449678;449689;440958;440964;440966;440975;440984;441010;441015;441022;441038;444233;44263;444091;444210;444122;444159;450101;450113;423413;422123;443865;448844;417993;418018;418002;421464;421479;421480;421499;440719;439947;441754;438362;439404;443625;442049;443427;442529;448134;433602;423956;423449;423440;421769;414012;445300;445302;441422;441436;438240;439918;439874;442622;442231;440296;442342;448940;434546;426360;426357;426359;426356;449004;448228;448998;449057;449036;449031;448248;448259;423107;419907;444162;423450;420773;426740;437257;430614;421963;448242;448945;435072;448961;420320;420425;421869;420714;423159;420157;432850;432622;432458;432578;442357;426735;427110;426711;421792;421870;423480;433865;448097;438707;443392;434029;441070;433891;438687;438720;438740;444353;448088;448011;447971;448066;448103;443402;430609;421920;426889;425229;426358;426970;448264;448950;420730;427031;420310;420153;422103;427040;423162;423822;423208;430533;445064;434496;434512;429706;429758;429736;429779;429718;429749;428946;441207;448060;426684;448486;448465;448820;448451;443904;442732;441602;448527;446464;446636;446442;446222;423873;448624;448708;448760;449129;448280;448283;445392;422095;422168;420940;433389;448214;448213;449200;449201;449199;433176;439243;433117;449238;449229;447409;417015;418651;418661;418664;421198;438966;437685;433768;433792;449669;442674;444213;449715;444196;423833;438978;448193;449221;425454;442747;443840;440732;443803;442682;442638;439026;433818;442353;424574;433970;433782;442826;442418;442432;448880;432642;441251;442064;433811;423836;426918;423753;428490;437267;437239;437263;437280;437205;437206;437289;437269;437256;433877;449265;423525;445213;445217;420075;423747;423806;423171;423905;423737;433953;424154;448083;435154;435145;435153;435149;444242;423167;427135;429022;437912;430433;424957;440803;448594;426896;426894;426897;424969;418704;426679;442742;442757;448082;433776;423369;423781;423577;448220;425967;449214;434653;420750;420751;420144;423176;423224;423771;413022;421921;418008;416736;445214;445215;425323;445734;423129;448049;448035;433875;433826;437875;433791;423246;421904;447330;438544;444342;421804;421803;443360;441202;442834;438311;448170;425335;441591;441556;443587;443494;443113;443436;443607;442845;442573;428895;434461;430103;429447;423651;449136;420187;420194;432517;440319;419434;429053;432377;446347;427758;448068;441781;417509;427789;430021;422126;445589;445387;432366;432347;437874;418263;432292;437898;422687;445775;422151;445080;432281;434213;426287;426286;433959;444413;448056;448597;448518;448491;448791;448487;448803;448482;448507;448776;448485;448810;448531;421472;419387;421477;421474;421450;421451;421473;421475;421476;421478;421496;421497;421498;444078;444075;444076;432224;419802;448251;425804;432206;443454;442914;442562;438692;444365;438563;432328;425359;443846;443871;446309;441375;448314;449151;448374;449001;448279;449150;448809;443707;440779;442669;440703;423799;421823;423512;440721;433713;421822;418681;423798;423072;423481;438702;443609;424485;417619;417595;441975;424140;420522;425791;425817;425709;441000;427300;427301;433872;442257;426671;444256;428732;426670;426674;449157;419853;449662;444108;418004;425460;439368;439428;443024;439000;433648;439006;433544;439160;439228;439249;433656;449209;438923;433327;438944;436384;426772;426934;432244;419763;420688;439214;433185;433190;433082;433403;433104;433170;449224;433455;439314;423540;427022;426960;425969;433785;442179;420689;430535;441247;442701;444010;427023;441120;440333;433857;443933;442297;438477;440715;444261;443802;441617;443957;428855;436869;423436;419515;419987;448707;445377;438177;449080;417428;424383;424517;417608;420141;424045;443229;417297;417244;422102;419307;419306;419308;448785;448774;448541;448450;423346;448504;448549;421982;441703;441019;444141;444147;444146;441051;444192;449681;449720;444262;449630;449722;449702;448564;421817;420744;421818;442833;440126;425271;444193;428354;422541;434640;434683;

437763;437764;437786;420591;448495;448799;448777;448481;443271;443282;443  
275;443278;438390;438414;448529;425408;429227;418426;419178;434572;423752  
;414460;423548;423263;421951;414535;414548;437889;438409;441683;442270;42  
6777;426786;426790;426703;426676;426879;426822;428922;437756;442327;43690  
5;420257;443807;438424;438272;442647;423618;435699;445651;432177;445641;4  
45870;446741;432201;448478;440939;448406;418804;446474;446714;443945;4417  
68;439715;446068;423532;432211;446873;445762;446064;446080;446352;445863;  
432343;432261;448970;430647;436326;448044;448072;448098;448038;448073;426  
968;419947;443210;424034;433350;437866;447955;423243;438423;443502;441290  
;423199;423132;421900;423244;449729;425619;448404;441891;432955;441026;44  
1027;441030;444101;441017;433898;448096;438630;438696;443614;423891;44287  
8;441132;443189;419754;434651;448501;448515;448535;443214;422044;422092;4  
42169;441881;441142;441371;448698;448764;424615;424621;430678;430677;4306  
02;430676;430691;423979;439550;425739;433695;433794;438593;442301;438671;  
447794;447796;449626;444243;441357;429169;445846;421768;423150;444202;449  
718;449655;449694;449704;449711;444189;442935;420661;438656;448415;432992  
;432993;422621;444143;438933;418317;420218;425446;439105;441250;426811;41  
9304;448579;440144;441613;441609;441635;438303;448085;442208;433764;44129  
7;441284;443076;441239;425252;448017;439886;444358;447963;447999;449691;4  
44229;444231;444270;423092;440948;439861;419311;420367;420379;420433;4380  
77;421785;435312;421660;420418;420421;420426;420439;417260;442940;442531;  
448003;444356;442059;423015;437601;418889;418056;417362;436238;417422;423  
712;418023;417994;418011;418014;418015;418016;445317;414470;415476;447446  
;435409;425246;436291;436231;425205;443862;438744;444355;432191;440636;44  
2640;445315;445275;445270;445359;445277;445298;450094;422940;445271;44533  
1;445281;421352;429484;412912;450150;421353;445276;420092;437001;437435;4  
37436;445086;445087;427026;419893;421712;444647;421351;421621;445378;4217  
24;413021;436491;429157;418019;418007;427508;418235;433895;432183;445769;  
439606;420289;420236;433814;433796;423589;444964;449664;444254;417564;420  
351;420353;424602;424389;424479;440059;440533;433382;433016;445573;444090  
;423821;448189;449253;438760;422619;444174;440956;444258;444171;449631;44  
1035;443535;421489;421485;421490;449647;444212;441040;449692;449727;44966  
1;449714;449705;444188;444224;444225;440995;449682;449716;449673;440138;4  
44160;442387;448865;432720;448913;448828;441332;441596;441575;442170;4383  
76;439619;443530;441262;439611;433793;425445;438479;433927;433838;438610;  
438670;444400;433482;433758;438631;433938;438714;444420;448108;438594;432  
956;447323;440507;440521;441405;420722;420600;435308;437932;430089;448483  
;424731;424666;440258;418581;417425;442210;444279;438280;439449;443051;42  
2036;436227;420450;414580;432189;446219;446320;446216;432287;422145;41603  
4;428368;442262;443539;444448;441999;448925;445628;445823;446744;432205;4  
32744;439857;440884;444857;443274;448603;448728;424661;421210;421185;4438  
73;442778;418250;448744;427587;427591;426906;436206;436345;436337;447500;  
447528;444338;438970;448154;425973;433961;420229;441981;441255;420201;447  
428;425458;435405;435408;435419;425861;444872;433192;433263;434347;447396  
;447441;447442;438969;438949;438947;438951;438953;438948;438959;438954;43  
8955;438952;438958;448157;433225;430818;448951;448955;418043;439134;43291  
6;430001;447391;417404;430959;447346;447450;447258;447465;429233;434605;4  
45251;427251;437852;438173;421903;423772;444094;441012;444167;429777;4184  
28;426179;420555;438161;444611;424604;435313;437212;437217;438956;417512;  
413023;434721;447321;438967;421684;438971;438965;447302;448051;428260;419  
397;444438;444343;447394;447395;425990;435411;419390;429822;423425;433803  
;441111;426854;447510;423172;421948;415105;427293;449728;445256;448162;43  
4764;438633;444106;444182;444169;449696;444218;447443;432215;422179;44622  
3;437902;439350;442246;449670;441174;443004;433197;433451;439208;439226;4  
32895;432874;426020;439367;433254;429143;448472;448469;448496;448499;4215  
91;415458;418861;427010;438330;441579;421196;443569;444445;417561;441758;  
424662;417021;417022;418626;417023;437514;446214;432384;446192;445422;423  
724;443487;443066;419850;432921;448226;449078;432321;432202;419840;426506

;426472;426474;426473;426769;435132;428882;428886;447710;420556;416035;424870;427271;427272;426538;419560;419559;416029;419210;424487;447511;447505;447503;447529;447502;436327;447501;447504;423458;428994;448780;440563;441618;441569;433712;442556;438576;444442;434468;426833;433435;433107;448470;448506;420785;424933;448661;421483;425399;444441;442548;443403;441053;443599;443199;448687;448672;448621;448640;423847;444098;444083;440997;441042;449706;441047;449660;449666;444181;447802;422492;420521;443223;422079;444100;423582;422437;420006;421935;443037;439938;441642;441697;441612;440167;441708;440116;442728;442788;442808;438456;438545;439868;439599;440538;439505;441830;439618;439639;442140;443447;442079;443574;443514;441227;442592;443891;443811;443841;443880;443883;442686;443929;443948;443902;443711;443098;444003;440681;441139;420698;434673;449148;438573;423606;419396;438431;438543;449656;444117;442307;443387;443568;441824;433982;433711;419517;440257;443772;425340;439396;445353;439949;439988;439900;439911;441588;440241;440789;438447;438259;438343;438366;440659;442071;442084;442164;441200;441204;441211;441215;440009;441158;441183;443972;442570;439377;442736;442628;440766;439999;438412;443058;441696;441736;443698;442807;442711;440774;423196;448315;448296;448282;448274;449140;449042;448276;448328;448384;448317;448287;448269;448336;433849;421936;443795;443864;442058;449721;449726;449648;424029;444198;421879;421942;415129;445686;445614;446995;445688;446475;448458;443718;440612;440260;445417;422166;439630;420807;431089;441623;433957;419444;438470;442105;442981;441307;421886;441008;438676;440341;442121;441192;425232;440788;441730;442727;442088;441102;442967;436388;423144;423145;423094;442188;448510;441764;441744;441636;443561;443598;434014;443536;443070;448575;437091;437092;437093;440313;441218;423720;423501;423419;420964;433854;429699;442684;443895;438525;441632;441801;442854;427388;442995;441125;425305;443586;442688;442672;425751;437262;420984;437096;429870;425687;446949;421868;448591;448572;448635;448567;435047;448596;448545;421651;423823;437684;433778;448537;448616;439132;442248;438839;440303;433750;438725;447970;424625;438986;433834;439123;444439;421576;417663;446305;432276;432353;432333;422046;441775;448959;422075;432324;432195;432196;432240;424985;439135;442791;443784;441694;441737;422361;422348;422161;432390;438762;418723;445741;448230;449159;424466;424463;424603;442786;443991;448894;440969;444126;418373;446044;422357;417258;444123;423816;449725;444434;444375;442984;433752;433706;444088;438905;438891;438916;448198;449240;449252;438975;448138;438931;438973;420477;445255;445264;417664;436729;422933;442316;441660;442068;439381;448113;440695;420225;425292;425253;433805;433823;433698;425527;425338;425361;425304;425427;425455;425468;425470;424631;424649;424654;425966;435426;435427;435428;435430;425902;425836;439345;439354;416732;416734;439256;439257;416519;439791;425125;439707;439714;425288;425239;418584;432881;444854;433848;419536;433812;433816;429549;429507;429353;429341;420912;429414;429425;417464;429408;442407;421191;421192;433200;448870;433675;433680;433685;434949;433724;433760;433763;433701;433709;433780;434729;433430;420254;420196;433460;434787;449087;445414;446328;423013;423403;423556;417922;420316;420447;438604;433975;425565;441675;433691;420715;420703;438262;442335;449117;433828;438583;433906;438647;438587;433913;425326;425331;433894;433915;433744;442695;443747;440040;439484;438491;437954;423441;427292;431180;431240;420732;448638;443441;423508;436265;436803;423493;437232;437249;439224;439299;439191;439430;442823;440073;441863;433066;441873;448414;441880;423830;442323;448243;448238;440662;440692;449236;449257;445673;435311;442787;442866;442804;429700;441766;425697;439536;441221;442199;438315;422758;436715;436716;436717;442775;441201;425269;442155;449851;438215;438200;438220;438196;449910;449990;438176;434232;434241;437528;433571;448508;448662;430371;444631;444673;427469;427560;447748;435507;444718;434676;447972;448364;434022;443618;441301;441587;439627;448547;422376;448965;449667;438277;448902;448896;443218;421783;441693;444285;424974;421782;424978;437948;448488;444063;444066;427111;426661;426947;429486;421494;442751;448204;438776;449191;433665;425024;43394

5;433969;426707;427005;418258;448806;448807;448629;448623;448573;427392;448808;448595;448497;425332;433775;439482;443897;448505;436046;420787;448476;427322;448559;429881;420721;448602;425258;449032;443531;443112;439990;439487;439867;439442;441578;439882;442954;442066;448607;448751;448651;418264;448743;448480;423497;441723;442602;432886;433437;425958;425980;425875;433385;439185;433256;433428;432780;429413;448627;419887;448792;448557;448457;428907;430864;429163;448726;448588;434667;448660;448757;428906;437497;448678;448690;448696;448609;448622;448631;448724;448729;448731;448762;448769;435125;437755;448563;448592;427338;427339;428671;430862;428868;428894;428896;437090;428911;428913;428914;428919;428920;429138;429119;429123;443182;445231;412972;447609;428852;448669;428863;428864;448645;448770;429723;421213;447803;447804;448704;447610;443183;447612;448720;448656;448680;448611;448644;448668;448643;448584;448767;448552;448695;448699;448605;448719;448768;448664;448732;448716;436496;421431;450100;444692;430423;430376;428888;428918;448534;445234;433218;445238;448599;436721;436722;420015;419828;448600;448730;449882;422416;428491;417525;424566;443249;427743;430070;443936;440129;419858;425129;425141;430065;420877;443197;419748;419768;422757;422849;422901;422754;426648;425360;446042;422031;432299;446047;421465;421482;421484;443962;443805;443847;422119;445655;422022;422371;424152;421797;423837;423838;423241;421773;444166;423065;423761;421801;423479;423844;437886;449023;437901;449162;449109;449029;423542;423531;432322;432352;428824;445541;427118;420411;420416;432255;418257;442867;443629;441188;420001;437311;437305;444697;415703;422427;428903;445319;415698;415699;437313;429213;424570;429052;449657;450238;445171;422431;422432;423408;420733;420774;426954;427020;418708;423074;423073;440981;444163;425251;443219;421890;441076;430106;415787;426631;436720;418365;442193;442198;418366;418362;418363;418364;444740;449174;448320;448267;449020;448233;449013;448752;422048;419440;441122;441101;442968;421809;420309;443204;448675;420690;428851;448740;423653;442811;442797;438278;439570;439640;438466;423254;438623;423424;424028;439653;424531;424530;424562;423412;440399;440351;425453;433678;433697;442802;439725;438688;433902;434021;444359;440990;426697;440679;443988;423278;419988;448633;435124;426669;420441;425769;436630;428252;437946;437964;443205;418372;419827;419860;419730;426727;419731;418370;418369;422572;424332;417298;437990;417992;417995;418013;418001;416486;415041;440924;417299;413020;434666;442126;442163;433876;447997;438698;448109;448043;438560;444443;448095;438427;442122;439403;443391;441583;438440;441335;439406;423223;423834;437260;443768;423839;423218;417311;423409;430465;441342;442891;443473;443047;447587;441309;433839;441304;439424;439496;439934;448971;441399;448973;441427;441379;441691;441380;448804;430110;448520;430112;420719;423496;420742;426664;448759;441565;441641;438488;438345;435071;436413;448256;444277;419914;445726;423418;419933;423070;443951;442825;443830;439386;446213;421899;440566;439602;423063;423404;439542;449154;449123;449106;449085;449166;449132;449152;448232;448984;434054;449169;448305;448286;449167;448265;449165;449141;449026;448309;448986;448281;448369;449121;449160;448294;449012;448239;449172;449011;449006;423398;449002;442839;444492;448710;448756;448671;420328;448727;448663;448670;448625;448636;448587;448628;437264;424617;421456;443463;443093;443444;443594;438717;443027;444453;442977;448800;444447;447964;439747;440892;435310;433863;433878;433880;444422;447980;438711;438712;433471;425233;438632;423591;434474;430837;434697;434473;437885;437880;438000;432254;434133;427043;434467;434469;437876;437878;434672;418256;443342;439510;435303;430107;442885;448010;448398;441892;434648;434647;445223;435143;439827;424669;446473;439719;449659;433755;433767;441104;446992;446626;439687;424494;424567;417567;424390;424506;424590;444423;432768;448869;427308;427309;430109;430084;447835;447636;447638;447639;447640;447641;447642;447645;447646;447647;447648;447649;447650;447651;447652;447653;423353;423354;439817;432311;435305;415532;430807;447498;430802;448632;439775;447998;438581;444110;432220;446968;446979;446363;446083;436684;441018;444114;444095;444372;439341;439832;448059;4233

28;430088;417733;426892;443280;416431;417796;417813;417826;445321;449890;449909;449911;434034;438681;444323;438701;438649;438697;438660;438578;434036;440954;433738;438645;434046;438559;433911;433930;444397;438699;448016;438621;434045;433469;438644;438557;434049;433487;433844;433884;416428;439664;442771;443916;442729;442759;430464;430468;427313;420652;448794;448795;432178;447725;445220;421946;440864;414549;422902;422855;422951;427715;417390;435417;425270;425268;439821;428939;438112;420399;420404;425371;442224;439476;443613;442236;443888;442574;444348;421454;437333;447789;449839;449958;418275;438202;419596;424526;448972;438110;438088;419672;436479;413024;437308;438564;443577;433765;441692;442588;442581;443417;438572;438683;442524;448064;448021;441788;441778;438496;441637;443023;443046;443631;442819;438519;442869;438722;438628;434038;449043;443234;413997;414021;414022;429217;429223;449710;429222;415701;436104;447617;429200;442829;434662;434348;419264;419266;425052;434360;434362;420033;419895;429221;415456;423644;448725;448750;448714;448655;440699;425280;433666;442912;433494;442671;440739;440785;440757;440691;442744;440646;443759;442692;442632;440716;441935;448836;448570;423588;448526;420717;449637;441007;441029;441033;447977;438476;441177;441223;449320;439329;439353;439205;439244;433141;439166;439190;439357;439164;439195;439336;439359;439304;439229;439358;439320;439360;441645;441749;420716;424858;415455;436370;417551;420377;420405;420410;421201;420190;435406;416744;420197;442506;424529;424537;424597;424535;419935;448498;432179;445595;445594;445585;422107;445945;422157;422132;445630;422016;432256;432381;446601;446594;445746;445747;445662;422076;422088;422356;445910;445457;446425;422173;446182;446287;422073;422175;432370;422025;432380;432239;446025;445571;446634;432284;432268;432264;421004;422143;446199;446285;448788;432548;440676;440795;440802;440645;440758;442157;442756;440791;420784;448681;430674;430694;430698;427055;430569;432481;447461;425830;436723;438371;441872;417803;445074;429678;429673;436926;419438;443858;418273;422934;439209;413555;425674;438913;425790;425783;427458;427441;415154;418806;418796;434611;422751;438079;417582;417641;438103;415488;433211;422860;422862;422866;422867;422897;422925;422714;422735;422635;422952;422605;422625;422629;422632;422616;422697;422795;422960;422569;422942;422668;422662;422935;422722;422693;422692;422859;422863;422864;422870;422890;422892;422876;422879;438096;424405;438056;420082;426904;414530;447760;415462;415518;415520;437966;417743;417837;429457;417706;417823;415535;419550;425120;437642;419551;422702;429424;429434;417622;417804;432313;419691;422727;437606;422646;422669;422853;422885;422678;447633;431778;447624;447626;447625;447634;447464;441004;423257;447688;420817;430059;430060;449676;449698;440989;441016;441036;444253;444214;444155;441045;418313;418629;425484;422110;418925;430917;430925;422112;432307;442745;441864;414559;429579;449812;429675;444458;444462;444475;444478;435056;449724;414586;420061;437596;417222;417032;438081;438663;448111;429537;429550;419393;417493;417470;420179;434985;432777;420243;449299;420210;444595;429340;418981;415156;435020;447031;419254;446211;435050;429778;436457;427528;437451;427366;437211;420901;417934;427443;417925;436900;418210;418213;418212;418211;428853;420125;414016;416031;426893;417572;418797;420420;420435;420586;432232;432466;420233;424254;429568;424248;413593;419562;424342;417556;422425;418402;418403;418385;415640;429287;425779;425809;440432;440460;415646;421781;417485;426296;420025;420024;420026;443313;420648;420753;420758;423119;436852;420074;413591;413566;414443;427748;427772;427804;427677;427656;427657;427686;445244;417397;420473;416673;444209;427358;427359;418640;421205;437276;416524;429664;429666;429693;429703;436730;414477;426977;436889;436855;434372;442675;425132;434962;435017;435054;417972;432802;432812;432825;432570;432644;432620;442372;442390;448841;448827;448867;420159;441942;441952;442502;442358;432732;432727;432790;432602;448874;424372;427693;422438;437858;434656;428876;417529;434491;448463;437221;425311;433885;433940;425310;425312;425313;425314;425315;425434;425287;425236;433846;418842;418846;418849;418857;433668;433721;433731;433383;434051;433899;433905;433248;433



730;418839;422930;422711;422707;422794;437292;439080;433967;439063;437291  
;428942;416153;429226;428900;437977;442761;442664;417851;417569;416494;42  
9050;429728;419604;421760;437529;430868;418856;426094;429809;429810;41996  
6;437899;430583;424992;421757;429786;414624;429769;437911;437258;414437;4  
33490;441320;440418;439572;439601;440008;417764;417610;419564;429715;4289  
43;429730;445061;428956;445055;445054;445076;445056;434515;417711;419667;  
422907;422908;437234;437279;444432;433935;433674;439274;425720;425724;425  
309;418834;420636;419255;429732;433088;438974;428954;422400;429207;419582  
;419588;417530;417533;421747;436732;435146;435147;413489;448796;413996;43  
4505;429160;423421;438287;442104;438512;442083;439883;422100;445831;42201  
8;422067;432243;422061;445702;446283;446957;446514;446795;445753;445698;4  
32304;446771;422096;422070;446224;422043;446321;445692;445642;445682;4454  
20;432234;446027;422020;414587;439455;425749;440534;429399;429405;425785;  
425788;435062;424101;423337;432199;432359;422098;432338;432193;432340;435  
384;442663;440626;440218;443706;425698;433688;425827;417026;446589;440169  
;441727;438091;446156;417973;430019;432357;422030;425873;438425;420212;43  
7216;425570;437660;439277;425064;415629;429346;434960;434970;434822;43353  
5;420192;420161;443632;421689;436411;419726;444170;437856;420502;425763;4  
19187;417496;417473;425621;446600;436903;449143;441079;442168;440379;4300  
22;430047;417985;439007;433622;433324;438850;448221;433559;433521;439029;  
439118;439072;449235;449207;448211;448212;433650;438925;438837;439013;439  
041;449215;438775;439130;449231;449228;433597;433340;449237;448206;439027  
;449197;433313;433368;433287;448175;425684;425876;425924;432880;433644;44  
9217;439036;449189;433560;438995;439033;449230;449233;449241;438894;43898  
1;448217;449206;429630;419846;431015;431018;427619;420303;427259;420304;4  
24347;431013;425789;425787;425135;425826;426639;448513;449294;433617;4392  
79;433355;433333;433502;438910;433241;448152;439106;449284;449301;449303;  
439294;439268;439287;449275;449277;449278;449280;449282;449286;449288;433  
126;433302;433398;438806;438830;438831;449190;449195;449196;449176;449188  
;449243;449244;449247;439003;433626;433632;433641;433653;433598;433505;43  
3509;438921;449249;439043;439125;448131;448119;449245;439028;449220;43926  
5;433139;449302;425794;439024;449290;425982;439005;438937;439270;439267;4  
49297;433113;448219;438979;448164;448166;438902;448147;448149;439030;4336  
03;448127;448128;449293;449296;438893;438836;438929;433569;448207;433542;  
433546;448195;433593;433545;433543;433366;433534;439004;449234;439038;449  
276;439275;439276;439269;439282;448197;449223;449192;449250;439271;439273  
;449242;449232;449178;449216;433400;422417;429209;415708;443208;438322;44  
8327;448339;448324;448299;417592;424442;424572;440903;440873;436978;43698  
1;433759;425231;433866;434020;433671;433673;433968;420205;420169;419589;4  
41433;421193;427093;427021;422926;430714;440776;440807;448410;441465;4409  
87;438337;445631;445640;445649;449824;422037;432271;448184;447305;422642;  
425828;445617;432930;444370;425431;433883;433892;433682;442844;442979;441  
784;438462;439504;439574;433683;425437;438434;441547;442309;425433;438505  
;438338;442848;448023;448078;448007;439547;442284;442343;425438;425439;44  
4352;444354;422140;421384;450125;418017;417921;414045;417447;422027;42203  
8;414631;448928;427103;432207;445681;445724;445625;419871;419809;426691;4  
20978;420998;448517;440729;442801;440767;443800;443714;439979;440068;4399  
59;440020;443967;443765;443983;424865;424896;415601;444591;414594;425139;  
442320;435049;432267;419838;420985;445572;432327;422122;445583;422120;421  
011;422054;445462;432194;420820;417027;422718;420804;422185;438984;430046  
;444460;437447;447549;447551;437448;447550;419652;422465;422176;437950;43  
8067;415150;425435;442273;441145;443582;441607;442240;441590;418355;43727  
8;437532;437535;447670;418792;434357;418793;420327;434369;430856;445242;4  
34654;445221;445222;445226;445229;428201;430105;444272;418312;443860;4176  
91;426895;437929;434539;414428;448864;448866;428927;428929;444468;418989;  
417430;447047;447554;417858;449800;418191;426888;421737;434511;434498;417  
982;422377;444481;448142;449213;433347;438941;438892;448183;433372;438754  
;433655;433548;433351;437222;437209;437208;437215;426920;437233;438102;42

6876;437238;437261;437281;446236;446332;423237;423387;417949;430104;438113;417929;423044;436726;417928;439957;417953;435390;417930;448363;444430;439475;439855;438506;439415;442113;420270;433720;443782;444345;441773;425921;439222;439288;439232;424032;417421;420388;417945;417943;429760;433786;448993;449135;422780;449138;424626;449142;448260;448235;449003;423507;448262;448244;448376;449086;449084;449082;449083;448291;449007;448983;448229;448316;449038;448994;438652;447986;448379;449156;448372;449090;448388;438618;448306;448313;449104;448345;448348;444483;447545;447544;428925;428926;420295;424344;420585;416742;449017;448370;437721;435141;441398;422615;422592;429735;421562;430039;430058;430057;449817;435372;436938;436922;436923;430051;436934;436924;449818;436935;449821;417535;417481;415472;422909;422724;422602;422586;422913;422691;422626;422597;422695;422706;422686;422694;422851;422633;422611;422594;422912;422599;442154;413648;445327;436271;436397;432871;433071;417991;417987;417988;417996;418010;418012;417990;445254;436203;436201;436207;425221;425193;436197;436368;436295;419681;425188;425201;425210;425212;420128;436216;436353;436324;436348;436328;444598;444556;425654;425653;425797;425778;425651;425652;425784;425782;425780;425670;425650;425663;425808;425671;416525;429695;447299;442978;444477;423203;423202;442794;444232;444249;444269;449703;444201;444204;444197;417831;437450;444463;417202;421284;444571;425165;425172;421307;421339;421340;421294;436614;427460;427461;427444;427445;425167;444574;421318;417515;423340;429821;427061;430581;430661;450041;419975;419963;419964;426836;426646;437287;446310;449687;444085;449646;444226;444235;447352;447353;448080;447987;448081;444082;449709;444257;444394;433489;440289;440025;438484;438318;433677;433679;439429;440248;438516;438334;440201;439456;440464;440225;437904;417228;415642;418702;445268;423102;439592;439588;433772;432954;425449;425798;432601;438622;438662;420203;445334;425318;441984;433667;433729;420242;425807;427621;415134;448397;420214;448958;441365;449024;448224;432280;417217;444179;441025;440953;445269;433496;425593;444450;433770;425450;425355;441604;425917;420534;420531;420456;423221;445295;415141;417240;416731;441402;426737;430478;418684;423477;423124;432188;426993;420948;423367;430946;428725;435643;417255;425605;424015;420532;442306;425803;448947;445293;418099;446501;414526;445280;417589;417754;437877;428931;428932;417231;445296;437903;445175;420226;424010;423154;421776;423487;421777;437456;425962;423911;441381;422133;420207;422165;433426;423943;418673;417226;420287;425243;420253;414523;424490;435061;420170;420156;417266;423401;445727;417233;420067;417302;417736;417749;417695;422617;422920;422916;422917;422700;422708;434901;417997;417998;417999;418003;440256;415147;417698;417301;417248;416482;430469;429711;421743;414015;417220;438002;438009;438001;438028;416144;436468;418378;426527;416143;445684;427129;427150;426933;419967;426793;426775;426734;427696;426764;427145;426803;427698;432279;445510;422880;444879;422640;435053;424611;447052;444479;447547;445629;432386;436937;432319;438116;435140;428672;428899;428901;420391;421449;435136;429139;430861;429136;429146;429158;430860;429141;429142;429144;429145;429147;429148;429150;429151;429153;429154;429156;442656;443780;424456;424457;417839;417565;424391;424477;424478;424403;424424;417651;417646;424425;417637;418247;418251;437135;425375;427098;447032;429844;447030;434709;441167;433585;444097;433068;442237;430422;417186;417423;412964;426503;426510;447840;424900;424895;424897;424898;424866;435060;419693;441319;438326;443061;418354;448692;433931;448749;448790;433766;442858;443307;443396;425063;450108;432348;418671;445763;421574;421575;449126;448241;445416;444656;437089;422420;422422;436099;428229;448522;412973;428854;417419;420563;421759;445856;44580;437754;448540;427337;428885;416832;417418;434645;434649;434655;431102;420080;417983;426414;426415;447845;421281;419901;429755;429716;416658;436827;424528;415655;430357;432210;432290;440233;437457;437207;417951;420910;448604;448618;423286;423216;423368;423087;428779;420059;447598;417941;417437;420623;417435;417442;417942;447660;429255;447236;437337;435163;434710;435032;420838;425166;418632;418795;421341;433646;420452;445216;435421;4

21204;434889;433499;421447;420854;445311;443262;421508;421753;418649;417334;419185;419186;417337;417339;416754;416747;418422;416752;420620;437351;417438;417436;424633;424655;429739;425746;418659;418628;422861;417947;420035;429571;418635;427385;418278;448860;432478;432762;442479;423583;418231;420844;445272;418230;417946;420083;420250;448907;421641;433584;424652;424647;432864;443310;440946;439848;429211;420846;437354;429797;419180;443308;424650;424644;418647;418648;429753;434502;417527;445057;419578;437338;437339;437356;437352;436412;447245;447246;447607;437769;437782;428890;448479;433407;439246;425899;439159;447727;447692;447694;447697;447702;447709;447716;447719;447721;447672;447687;447656;447664;426288;421653;447678;447668;447655;414629;428348;447690;434631;447667;447718;420063;416499;443293;447613;418417;420619;420605;419170;416745;418423;418424;416756;419182;420624;421504;443118;420046;419830;419867;429874;421738;447707;424459;417788;417819;424422;417737;422414;435429;417526;424993;429793;419598;429766;419593;434503;434497;428944;429773;434492;434507;424642;424640;427351;418657;418645;421187;416749;417534;419580;419568;419579;429762;419570;419563;447730;447681;420598;422598;422612;422628;422923;422759;437241;443305;420607;445069;421745;443261;418234;415652;421746;436106;415651;420038;420401;429724;434506;445060;422398;420055;443291;416493;444969;420039;434493;437357;421512;420044;434487;419977;426702;426806;429775;421932;443265;443270;432332;446609;446496;445735;432374;446031;441663;439014;420064;436456;416751;415705;419976;426900;426901;420397;430701;420611;418427;420424;420427;420429;420430;420436;420440;420409;437350;420395;428352;420368;443301;420396;420406;445058;423376;418634;423236;420423;420003;426761;430490;419993;415707;429208;429204;420609;415704;429212;415706;429713;429710;420070;443804;434632;434624;434621;434623;434633;434634;434622;434625;427394;423377;443288;418281;434489;445072;420749;421956;420370;420432;420434;420372;420373;420382;420390;420380;420381;420384;420389;429741;420386;418412;418414;420618;429746;430473;443286;445071;437358;447597;447599;437194;435156;447239;443048;443542;442612;442547;437341;445070;429782;418217;442330;442568;439497;419587;421750;428361;429770;437348;418024;424658;427379;429196;418240;421752;428359;437968;437776;426745;419974;445282;421506;437779;437778;437783;437775;437780;437773;437777;420040;447251;429740;426946;416750;417333;420407;420431;420358;420385;420845;427370;420851;420852;420394;418630;418656;424664;427350;420415;420398;420030;419756;421207;421214;429214;423375;422424;428945;428949;429742;425062;429745;429796;435443;450048;428828;440161;440047;440080;419980;430545;426907;426932;427002;427060;430590;430669;430597;430670;427071;427016;427014;426714;427017;427070;420011;420009;420014;426864;426881;427148;426824;426800;430551;430598;430472;426717;430659;427069;426917;430695;427074;430484;430655;427058;427076;430580;426919;430486;427062;426910;430658;426922;426921;427068;420010;423809;417730;432371;426682;426802;426789;445786;432342;432204;432252;425900;433073;433464;433112;433193;425862;432875;433123;433137;433249;433406;433433;422128;445755;418388;433364;422129;443095;441827;441315;438747;441748;422555;437290;422150;442710;422372;445677;445672;422057;435478;426057;444784;450025;417959;427153;430522;419957;419912;419959;419919;427113;426948;438890;425705;433361;433498;425704;425759;438329;443668;427457;427440;415136;427157;427072;427125;426995;430532;422664;422704;422705;422665;419829;420294;420803;446647;443978;442657;423883;432298;436836;430038;445915;432362;432238;432208;422160;445433;414456;414441;414525;448344;433012;425628;425526;425573;425644;425645;425487;442397;432354;417227;438094;437941;422080;442685;422105;414648;418667;419894;430024;445388;446186;417495;417472;420047;423774;445398;442753;440777;440663;442093;441123;439978;417974;446623;422109;449198;446483;415435;432376;432356;446193;422082;420949;416026;432360;422181;432192;432182;432245;422041;417940;415537;422083;445691;432308;422127;419453;422158;422064;423675;422375;418116;432368;423630;443701;432367;445697;421008;432288;445619;445552;446455;432355;445916;446612;446643;446050;445553;445887;432235;422154;422159;432217;432236;446014;

442192;443558;443512;418255;437235;423142;424894;421295;421293;427459;427  
442;427452;427435;425169;421323;421290;427454;427431;427437;427448;427427  
;425176;425157;421285;427429;425154;428935;425147;425152;425160;425164;42  
5142;421303;421304;421315;421322;421298;425158;425820;430519;447842;42489  
9;430071;438118;440044;440369;440265;443001;439594;439444;416141;448797;4  
23095;423055;449826;442713;442763;438426;443896;443986;443654;444001;4404  
39;413602;436500;436574;444473;421813;423716;421839;414010;420466;420775;  
420633;438721;438523;439489;423555;449640;444219;414524;425333;440255;423  
181;414457;421829;423053;423717;423099;423718;420146;419787;419767;419774  
;420329;420325;420342;421515;414027;417491;440973;444104;441034;444149;44  
4139;441002;444150;444092;444111;444161;426747;440957;440960;440971;44097  
2;440976;440983;440986;441003;441005;441011;441001;441028;441032;444099;4  
44120;444165;444178;444130;444152;417763;417550;417563;418738;445166;4146  
46;440783;438289;447837;416741;426701;419888;425811;425812;419395;422601;  
422712;442731;430640;445428;419775;419770;419810;416735;429137;428961;428  
960;427342;418658;417019;429734;435046;417877;420139;420313;437301;417775  
;417758;434643;434644;428861;413999;444867;420443;437610;417989;420137;41  
6469;416470;425801;447268;415153;415155;418794;417424;417694;424613;42461  
4;418801;417812;417799;424451;417746;424385;424377;424616;417740;417560;4  
24486;417652;429215;420032;417948;417955;429220;443294;447237;447248;4472  
33;447235;447249;447234;447232;447231;435033;447240;425374;428860;428870;  
428879;433266;430746;430745;430744;430743;435128;424905;424364;424365;418  
260;448022;444335;443038;441679;443673;441092;425240;443670;443562;442299  
;442817;442983;443657;422643;422822;420449;418624;425055;434361;434352;42  
4660;427364;424653;417024;417016;419583;421186;417013;424343;415480;41444  
5;422790;450107;450129;422562;420451;429759;420564;437940;420414;426796;4  
20544;420546;420552;420543;420545;420548;420551;420549;420553;420554;4205  
47;420550;426289;428921;415473;415474;415499;422813;422610;422956;437302;  
437934;422703;415485;427065;422577;422709;421463;422945;422670;422792;422  
896;422579;422924;422745;427101;427105;447462;417460;449652;427285;444583  
;437495;443180;428718;437459;437462;437475;437466;437460;437461;437759;43  
7760;437317;437757;437705;437722;422402;419713;424907;437761;437441;42240  
3;422406;437484;437701;428893;428898;443169;437698;437725;437727;450188;4  
45241;411954;420841;410718;410717;407896;431785;416316;407894;413853;4374  
65;420077;417201;428729;427456;427439;425174;421319;421327;421296;421335;  
417200;417514;421325;421328;421329;421331;421324;421308;421309;425173;427  
453;427436;425145;421292;425153;444606;436850;444568;415461;415526;414555  
;416415;420078;416317;416403;410535;419698;418871;431081;421365;450126;42  
8747;427675;427681;416696;419696;450102;426302;421714;444652;408478;40489  
5;407214;407215;434326;428448;428449;416886;411060;427531;418993;413862;4  
13855;426416;436823;426877;426693;444532;436101;426686;426958;426730;4306  
45;430512;435110;421690;445102;445096;418332;424673;437366;437361;437364;  
437363;437373;437362;424436;417871;417618;417720;417789;417724;417818;424  
429;417615;417762;424462;417717;417791;417577;429819;426645;426644;417194  
;418343;417395;427716;417500;417477;449823;436907;449820;449815;449827;42  
1723;419717;434636;419739;444994;419859;419716;419783;419782;419874;41989  
9;419958;419924;419936;419862;419741;419836;419805;427013;434541;416413;4  
19857;427107;419823;419917;427015;426482;430574;427012;426981;418330;4183  
31;447615;437386;436503;417587;417031;426363;426364;426361;424627;447593;  
428827;444787;444069;427019;426878;420091;418816;424469;421561;430064;434  
844;434863;450151;420538;419719;418864;419715;417504;419391;421552;419856  
;419900;422961;422964;418062;419908;430125;438141;434327;430153;429070;41  
7070;417071;435024;445082;417136;430127;434153;430146;417105;450110;43029  
0;434102;434128;417079;434345;427527;450091;427536;434090;430272;413560;4  
34073;434089;434160;434165;434171;434177;434190;434117;434126;434115;4171  
41;417145;417146;430117;417137;417154;417155;417171;430160;430163;430166;  
417092;430274;417068;417089;434266;434284;434205;434245;434246;434247;434  
253;434162;417151;430164;430179;434276;434252;426517;418847;434071;434077

;449869;434188;438211;449925;434093;434084;449984;434106;434079;449960;449891;449842;449932;449930;449926;434100;449843;434064;449896;434226;449931;434105;444065;430152;417170;416711;417966;424180;429000;434151;417144;417132;417162;430134;430141;417099;430201;417074;434072;417124;430193;417069;417134;430126;430200;429010;434248;449880;434212;437816;437810;429008;429019;429040;434197;434206;416664;418047;418881;427214;423008;416441;430231;434070;416451;419920;418903;430886;424295;449897;449850;417126;434302;434306;434143;434279;417109;417326;424181;429876;430151;418046;444062;434337;417172;430283;417086;434127;417165;434082;416464;434547;434339;416726;444055;427175;417449;417964;428997;434304;434172;429065;434113;429059;430182;430181;434343;449980;434163;434176;449855;430135;434161;418882;417175;434187;417117;434233;434332;434285;434254;434182;413563;417115;416643;430282;417116;429005;424668;434120;414366;413457;416455;430171;434183;417110;434081;434196;434116;417169;434272;430281;413456;434157;434167;434175;434180;434189;430122;417135;417164;430140;417119;417122;417128;417091;430273;430279;417065;434264;434273;434200;430291;434095;416460;430142;417114;417097;430286;434317;417088;430123;417152;417161;417106;417127;430155;437829;444051;434280;413653;417120;417121;430178;417112;417125;434238;434258;417102;416461;417098;430278;430288;417077;417104;430287;430271;430285;434159;434208;430129;417367;438194;434338;430189;430190;434146;430954;416688;416705;416448;422992;415598;425148;427722;416657;421272;437563;424297;416450;418059;417366;427218;416444;418070;416687;430888;430870;430894;416638;430895;418870;430900;430872;423022;417358;415608;415624;415609;417378;416650;430197;430289;434219;430196;426096;418884;416651;429612;416684;418911;417369;423003;418050;430878;417129;424285;416700;416679;417450;416717;418943;418906;418950;427174;434305;424296;427252;427265;424287;418887;418066;415627;423005;430881;418030;416666;416443;422971;423007;424267;424338;424329;424249;424268;424266;424336;413601;415613;424231;414622;415614;424288;424196;424219;424169;418040;424323;418941;424298;437861;429649;429650;418082;422974;418917;450016;450144;421364;415617;413924;418841;421317;449479;416459;434966;428263;417507;421334;418818;418851;416702;416680;427280;418931;422997;426133;423016;415591;418907;416641;418939;415599;418866;418817;416686;416690;416442;415615;418927;415612;419885;422965;416715;415592;417327;422986;416689;415626;428372;424222;424228;416656;418064;418901;417380;417353;416433;416446;424250;417348;424210;415603;427195;429623;427237;444518;427266;447896;429021;430270;430293;427226;430131;434137;434716;426120;422991;429068;416636;437815;437817;437812;437804;418187;424264;416637;414592;416685;417168;437824;416659;416721;414363;416718;430187;430133;416712;415604;419781;413557;413649;444601;418819;418823;434913;434843;434883;419392;429049;429044;429046;429056;413652;424179;429061;429047;429057;429071;429063;417960;418942;418052;418186;418031;416703;421687;426733;419837;419758;419760;444637;421707;416421;416422;429815;418340;418338;418342;418380;418337;418812;418334;418335;418336;418333;418339;445322;436487;427544;417203;440404;444632;429073;437809;416423;416417;414590;419526;420086;415622;428370;430150;430228;416709;427182;422993;422963;416463;430295;438147;438148;424252;418075;424232;424275;428402;419779;419816;419979;426763;426673;430711;426663;418921;424990;449870;417150;417149;417148;417083;434136;434316;449982;449993;434257;449978;434170;434088;434154;449929;449877;449963;449981;449962;449868;449994;449889;449964;430238;438207;449974;449919;449995;434169;449892;434068;430208;434075;434239;449887;438216;434342;438184;449959;438219;438221;438218;437576;424326;424218;423027;418886;416677;418873;418909;416667;418930;418934;417374;417503;417480;416639;416466;430113;430276;417163;430124;417160;418071;415605;415596;417075;417076;417139;430176;430177;417072;434289;417111;430199;430198;424282;413651;413650;417159;417073;418905;437857;418899;418029;418890;423014;422982;414618;416635;437843;444300;416649;416720;422995;424262;415611;417363;418937;417356;416668;427187;430889;422984;424261;417381;418955;418928;422999;416682;417453;430119;417370;416713;430204;430114;415620;416694;43429

9;430280;437805;422968;418830;416453;416439;419513;428382;415602;428381;417448;414595;417354;417344;430118;430257;430137;418935;418074;420536;418944;416424;424220;422988;421548;421549;430892;428378;416692;430890;424223;424226;417360;424258;415621;430933;430877;417355;417350;416701;416722;427208;419711;416669;424243;430938;427249;440055;424279;417377;414596;418868;430867;424247;430934;416418;421297;424289;415606;427203;430904;430883;418940;418038;415616;419524;420628;416644;416663;429045;429072;417113;447592;416683;438159;418948;416728;414368;424284;426129;426131;426130;434108;434069;416654;449961;434199;434251;429598;434096;434313;434265;434215;434091;434336;434214;434287;434250;434201;434323;434346;434211;434225;434334;434328;434256;434335;434204;434259;434286;434145;434308;434298;434244;424269;449883;424213;429628;418922;418945;430184;430188;416710;424209;418908;443253;418938;416714;416665;434186;417375;422962;426102;417081;416447;418055;418077;427220;417085;418888;418078;417371;414364;416456;424292;414367;420008;426672;426798;426828;427774;427777;420007;413562;427769;427672;427678;418079;416662;420028;437822;418910;437813;423025;427206;427178;434288;419263;420806;423506;425725;418936;434543;434135;427193;418958;418956;418957;414593;417365;417349;417456;416652;418034;423004;424198;422973;416454;416440;415607;424175;418952;414597;414617;418867;415610;418877;414620;423012;434125;422990;414621;414369;414365;430211;424276;424240;437864;434097;438151;438162;434263;416514;416681;418061;430167;417133;416437;415619;417093;430209;418872;419870;434067;434085;434223;449928;438185;424308;426082;434270;418883;416435;424241;427177;423017;430918;413487;422989;427204;424230;438143;417100;417095;430292;416462;412970;417101;417347;413486;415600;434109;430887;418069;424173;416436;415594;449844;434087;449973;449991;449997;449904;449905;438193;438217;449927;449864;449972;449902;438203;449906;449856;449983;449845;449861;449867;449992;449903;449913;449863;449866;426667;436847;417147;429041;417130;417351;417368;434185;430202;417118;434249;434594;434595;417087;429039;417082;429055;415595;434184;417066;416445;422975;429066;418949;418912;417361;413455;420029;417096;430259;430174;430214;426441;418782;429064;413458;417140;426512;424852;436068;426437;426446;426452;418775;418776;418780;418783;418786;418787;418788;418789;418790;418791;447846;424871;424889;430165;418774;424849;426540;426537;424848;429020;444455;424863;417103;417107;434112;417153;434315;434086;434140;434080;434076;434207;430175;430180;417174;445172;445173;436047;413928;413931;413925;418113;435631;429875;418865;424856;426426;426451;430262;426438;426439;426440;426442;426443;426445;426447;426449;426450;418771;418772;418773;418777;418778;418779;418781;418784;418785;426448;430265;430232;430239;430223;430170;430268;430234;430225;430172;430212;430249;430168;430221;430216;430162;430245;430161;430248;430169;434066;430173;430213;430215;430222;430219;430267;430250;426453;430253;426436;426444;430210;423033;417364;424191;416727;427179;424893;419262;426421;418820;424851;444593;434132;434134;434178;434114;434119;434156;429028;429060;429069;429032;417108;430277;420879;434236;434269;434202;434227;430191;429054;429058;434193;434192;417156;438188;416465;417158;434111;418341;434179;447900;430294;434118;434129;426513;417142;417143;424286;437531;430275;417028;444058;414619;417167;417157;426111;418892;449956;417173;417123;429025;434282;444054;428995;415541;415542;416419;418855;418854;418821;418825;418829;418843;418848;418852;418853;418822;415584;415588;418826;418840;416473;413890;413892;414378;418995;418244;418996;418997;419000;419001;412459;420107;428822;418999;414379;418998;434568;434567;413711;413523;413854;413750;411926;414691;412978;416372;422523;416368;414690;413791;413697;413761;416335;416350;424360;430722;430725;412982;414663;412983;429093;413691;420100;414380;420099;413746;429082;429083;413751;413748;429084;412979;428458;428462;428830;449480;449483;414938;414935;413887;414937;414936;407893;428470;414940;407071;407073;428471;414689;412980;413858;413749;407976;429075;428476;416885;447911;437620;447912;447913;437615;437613;429173;429167;429164;437609;434704;447020;447920;437612;430841;429170;429171;434705;447908;437603;437607;437604;4291

65;429168;434703;434699;434706;434701;429166;437602;423040;447026;437605;  
406592;405839;406223;411956;447918;413897;421238;414521;418809;408665;408  
666;408667;424355;430741;430724;430728;430731;430733;416366;416319;406030  
;416318;417030;437616;403932;403933;403935;429091;414688;429094;429095;41  
3809;428463;416377;406593;435137;413518;413519;413521;413520;427812;41287  
0;412871;424357;407193;430738;426168;426173;426180;426181;424358;413515;4  
13513;413514;413516;424356;430730;426171;418245;418246;438930;425216;4182  
52;447522;436284;447482;436288;436303;436377;436306;425218;421466;413881;  
449478;449481;414934;413895;433568;426584;425123;433207;425972;426008;417  
924;433375;448215;414577;414578;449246;448209;448199;425948;426007;433367  
;433298;433541;424982;419230;428683;428678;428676;428674;428675;424670;44  
4493;424667;438998;426015;433456;433171;433443;433172;437907;447836;43446  
4;436236;436264;436364;436373;429998;436263;438065;438048;438106;438070;4  
38092;449477;449482;436225;436334;436304;447481;436307;436341;447520;4231  
80;428700;428704;445306;417980;443231;428698;445257;445358;436355;447470;  
426927;445266;445267;419772;423169;447757;421467;419984;419834;408480;412  
873;413856;429092;416339;413876;416323;429854;413729;416042;414941;421241  
;413860;425118;430737;426163;426167;412869;429090;416326;416352;406801;42  
1245;421239;421240;421242;421244;421246;421237;421247;421249;419733;42844  
7;416330;413867;416378;413891;408489;449485;449486;416333;449476;421243;4  
16402;421248;416322;413900;417979;428441;449484;434561;434571;417176;4120  
28;417443;428443;413873;416427;408668;408484;408485;416409;416338;416381;  
406034;416429;416341;426183;426182;426187;434637;447212;436820;436865;437  
139;447173;428331;421554;444588;427732;434897;434896;434887;424854;427100  
;427130;426942;430705;427024;427139;437374;424987;426534;426504;450115;41  
8970;419747;426640;425658;420808;418045;427726;427727;427730;444573;44455  
5;444577;419751;419795;429048;450213;416538;444594;434982;428726;426658;4  
19826;419910;419736;419752;433660;433277;438829;425735;433554;448117;4391  
26;438841;433594;419789;419714;419755;419847;450139;419727;419812;444596;  
436833;419769;419777;419814;419821;419788;450212;419785;419746;419796;434  
103;437455;428314;421291;444566;444569;428285;418869;428341;421286;444603  
;444604;434717;434854;428262;424862;434677;424841;426417;420786;420788;42  
4902;424903;424859;424864;424888;424860;424861;424842;424904;429971;43011  
6;430132;427583;435018;434934;434974;434902;434905;434907;434916;434812;4  
34825;434828;434884;434801;434732;434892;445084;434953;434797;435013;4347  
88;438234;438246;434867;434978;434924;434831;434891;435006;434986;435029;  
434840;434849;434964;434827;435010;435011;434829;434987;435015;435014;434  
925;434971;434969;434967;434855;434961;434904;434731;434882;419904;422415  
;428280;434686;427450;427433;427288;434590;434592;429970;427190;434873;42  
1426;418897;444567;426119;434923;425793;444682;410045;404253;416539;43643  
4;437315;419922;445110;418962;437595;437570;435473;419864;426683;419844;4  
19818;434588;434824;426100;427212;424166;426097;436598;424194;424215;4242  
94;426665;444278;415543;415544;426530;424890;434124;430243;450001;430256;  
430229;434122;434121;430236;430246;430237;430263;430264;434092;434261;430  
235;430240;430242;430244;430247;430255;430224;430233;430258;430266;430205  
;430206;430207;430269;434296;430227;434123;434271;449914;430254;430241;44  
9888;430230;424263;430220;430217;430226;430261;434281;434148;434139;43414  
4;434149;434138;434150;434141;434142;434147;434209;434131;426514;434322;4  
45219;445085;430403;437309;447380;427290;436621;436565;436607;436602;4366  
10;437916;437985;434921;421600;450064;450021;422507;426328;440746;443760;  
429183;437942;418429;418098;439387;438166;425138;437369;437379;437385;437  
381;432389;436325;424167;424174;427240;417847;443236;448171;425706;429182  
;426291;447455;437926;419953;424986;429751;414634;426657;425133;421594;42  
9577;420258;430579;430618;428801;424941;447700;447686;429729;429737;41842  
0;418207;421501;422566;422568;422788;422903;422954;422858;427721;422620;4  
47389;417752;417629;420048;443296;422856;422914;423797;440962;423411;4480  
36;442325;448040;447966;433716;442943;441653;441619;439471;438540;438273;  
440430;440391;439409;438528;438267;444252;449723;449686;441050;433933;433

951;438715;433954;423443;423796;423163;443279;443272;443281;443277;443273  
;443269;443276;420791;420792;424877;427136;421560;418206;418208;418209;42  
0058;417806;422847;422932;417532;429764;429757;421734;421755;419602;41959  
9;417531;429756;429767;419594;419607;429791;429748;419591;429727;427383;4  
28948;417005;419586;419597;424635;418798;420334;420442;418638;427390;4211  
84;417006;418652;421744;419601;429201;420417;434600;434598;434599;434597;  
428774;437785;434596;437784;421349;421350;450134;450098;428789;450085;430  
397;434277;434310;449879;449975;449894;434099;449853;434107;434293;434063  
;434104;434262;434307;434320;434341;434094;434166;434222;434110;434098;43  
4303;434217;434083;434101;434300;434311;424239;423019;424234;423021;43432  
4;434260;434290;430697;447215;447206;424984;426054;422401;422384;420095;4  
36868;447281;428371;431086;431092;420819;430398;447196;447307;447309;4473  
57;447372;447274;447275;447364;447374;447469;437772;437774;435491;427166;  
421333;421320;445077;422463;419651;435395;426159;427275;429812;425151;450  
028;417204;444754;427507;427516;435289;444770;428365;431118;427278;436973  
;437370;418980;447736;434545;419176;447211;429634;430425;437811;422047;41  
7340;443314;438037;418188;448666;435414;444838;444615;420576;435538;44463  
0;417939;437821;427590;427520;445177;445169;445179;437992;439203;433448;4  
37983;420376;420383;420413;415534;415460;415465;415466;415469;415515;4155  
25;425842;425823;420419;420428;437982;434074;419544;430974;435531;447175;  
436802;419522;419523;427462;427446;418184;428805;426515;449987;438212;438  
209;438213;449939;449985;449988;449986;434283;449924;449907;449966;434231  
;434242;434221;434216;434218;434295;430252;434312;430121;449979;449840;43  
8152;430185;434267;450000;418932;438172;438171;438174;434340;438142;43814  
5;434291;434294;438156;434278;430183;434330;434314;430128;416648;427228;4  
17451;426091;417341;427188;438208;430977;416691;415625;449873;449874;4341  
94;416716;422970;422996;418924;437803;417342;437819;437808;418081;429608;  
418923;449852;449881;449885;449954;434191;438190;434301;449884;434152;424  
256;429602;449955;415597;427236;427239;427230;430154;416725;426095;424235  
;429653;426134;437839;429651;418053;424312;424313;426112;423010;418067;42  
4302;424246;424259;422981;424193;418900;424202;424212;424229;423018;42298  
3;430968;424333;424251;422967;430975;424208;430897;416438;427241;430943;4  
18054;426135;427246;430902;424340;422978;418929;418951;416708;426080;4180  
68;423031;427196;424200;427207;427180;427215;416699;424238;437844;424245;  
424331;430928;418913;418032;416719;427216;426079;437842;424305;416707;430  
909;430953;422969;427205;427189;427260;437814;427222;416693;430964;427210  
;427191;416724;429617;429655;430979;427197;430893;427199;429631;430899;43  
0884;437850;437840;437851;424334;437848;430929;427219;443184;427202;42725  
4;427209;438195;449898;438183;438180;438181;438182;438179;449901;438186;4  
38198;449876;434065;449900;434240;449886;449860;430969;430937;427253;4272  
56;427255;424270;422977;424316;427247;449865;449841;449859;449857;449862;  
449858;449918;449917;449920;449915;418904;437853;430931;426093;429637;427  
194;430932;430976;429600;429622;427200;429613;430880;430885;429609;417382  
;422976;426116;424211;418033;423024;424214;424221;422979;429652;417379;42  
6103;418953;418875;426085;429615;437807;430906;424309;437863;424337;42608  
1;417454;430911;423001;423032;424242;418876;429654;430905;427181;424314;4  
29635;429604;427224;427234;427499;421345;426109;416698;416653;424204;4342  
55;418073;424183;418933;417455;416434;416729;424203;426113;424227;414616;  
426106;426125;416647;424178;430910;424310;424205;430873;418880;424184;418  
878;424324;426087;424197;426115;424189;438191;438189;429614;434155;437862  
;430916;438187;424274;449967;449940;430869;422412;427598;427555;414625;42  
9588;421740;435064;421748;435314;435016;437644;443268;447711;450003;42710  
8;424388;421399;435540;435487;435497;444735;419546;429787;419595;425678;4  
21756;444746;430385;428780;428707;447088;436880;435484;447616;422532;4470  
89;436815;427595;437409;427611;437399;437793;438222;434912;450103;418203;  
420588;426317;421378;421630;422519;422534;422546;421635;450061;427547;450  
006;424931;424930;444743;419705;437398;437404;429561;434639;437410;437400  
;437432;437397;437395;437431;437396;437393;437394;450149;437403;420027;43



0353;435513;447905;437401;436998;450015;421603;450019;437794;444661;43787  
1;444773;437788;430411;437553;437421;437408;437792;435510;447331;447332;4  
44708;450066;435488;435407;435410;443256;418979;424961;417976;430035;4198  
06;438062;444620;435502;444679;450026;444622;444698;444681;434935;430850;  
429121;430361;419704;421730;419906;419960;422649;422744;444663;435509;437  
918;430536;445108;427749;418109;418097;435031;426321;437270;441895;425257  
;418361;427279;427795;427799;427802;429303;427761;427700;427692;426122;42  
7673;429990;430871;429380;420818;429996;430006;450009;444552;420907;41649  
5;435544;421721;447889;447890;420301;428788;430378;444667;421435;426508;4  
17977;420812;435363;435389;430056;435358;430062;430054;435362;435359;4300  
55;430061;430053;435369;426519;429178;450038;437820;437405;444728;417761;  
424983;429843;422459;437923;418967;449819;426469;437559;426089;420051;426  
295;426044;426049;426025;426294;445291;437922;417773;419766;419750;429784  
;424368;424404;417742;417805;417562;417685;437956;438115;447072;445294;42  
9534;422732;422741;437988;437913;416678;438224;434684;434690;427102;43061  
0;437790;416506;417779;417865;419764;445290;445283;445286;430951;445117;4  
37825;437789;429989;447174;447177;447168;436861;436877;436838;436886;4368  
34;417722;417787;424398;437921;437928;437770;437781;437424;437422;437423;  
437425;430025;447303;447273;428384;437132;420809;447680;449830;429043;438  
301;445043;419931;422141;427506;440090;437980;428366;418396;429271;429460  
;440378;438205;435447;450177;436887;430879;429272;422524;430394;429269;43  
0936;419762;426068;425144;445105;430923;440712;440147;427184;429624;42961  
1;419388;436622;429545;440109;438437;429968;434373;440063;436885;426137;4  
23948;421507;430914;426136;430901;430957;423030;427217;449804;424981;4195  
18;441726;436917;429618;427172;430960;430972;427227;435002;425918;425121;  
425124;425126;437213;441932;429264;429266;429268;444875;444890;444891;429  
270;429276;429280;429281;429282;429283;429299;444866;444820;444823;444827  
;444829;444836;444837;444839;444840;444576;419535;419537;419538;419539;41  
9540;419543;444592;429509;429513;429514;429567;429582;429501;429505;42935  
2;429355;429357;429372;429374;429377;429378;429385;429386;429368;429369;4  
29395;429396;442370;429316;429323;429337;429343;444908;429428;429474;4294  
76;417457;417463;417465;417466;417467;417468;429406;429407;429439;429450;  
429451;429466;433224;448834;448877;436975;434931;434950;434811;434853;434  
881;450117;429616;418926;426126;422543;429409;429344;436632;435030;450147  
;421624;421602;421404;450163;421686;447388;450008;422536;437253;437223;43  
7229;424207;427261;427263;427262;427257;430920;427245;443797;438233;42136  
7;438237;424311;419520;419666;443185;421430;421419;428404;427163;447102;4  
47774;425128;421683;426083;427242;430962;417373;423000;437854;426099;4180  
57;447117;424317;424182;426101;423006;424330;426098;417359;421705;418218;  
421429;450045;447766;422494;421606;421619;427250;429290;426687;444349;429  
274;429275;429382;436807;418041;418044;429641;421546;419183;450127;450137  
;422515;430965;421370;421685;434945;434685;429646;436804;429383;444848;44  
4826;447454;444831;434744;434745;419670;416523;434607;421300;443295;44331  
5;443297;447720;435476;435493;444741;444767;435539;428923;426884;426887;4  
36997;422636;439037;448158;448163;426051;425692;425760;439101;417830;4175  
98;422966;437288;434586;447193;429636;443300;435697;422547;442281;439966;  
443266;444707;429560;421503;421502;443787;444618;417856;437656;444880;445  
101;450004;450069;447775;447791;421595;450090;444653;421726;444731;435512  
;445098;418408;418386;416502;447790;443215;449938;450121;443235;445107;43  
7564;414642;422911;422738;422755;422764;422680;422895;423476;444719;43548  
2;435284;444696;416753;444742;430395;430383;450052;422498;424244;435517;4  
27225;418919;428804;443217;427490;417338;436996;436999;437015;437661;4370  
27;437029;444841;437639;437023;444963;437026;438231;444859;444894;444900;  
429478;429462;429570;429311;437633;429310;437030;444852;437636;429566;442  
923;439422;429508;429530;437006;444928;429470;444892;444899;429529;429572  
;429578;429300;429302;444911;444961;444967;429465;429468;444926;444957;42  
9327;429461;429565;429292;444942;444853;429589;444855;429317;444895;43698  
8;436989;429312;429326;429296;429313;429535;429452;444817;425703;425757;4

27432;416457;427449;429817;429820;425155;428259;421326;421330;434614;421289;414627;444641;428775;447092;444774;427126;429361;429358;425162;443254;434551;444600;432198;437986;434540;437975;437917;444819;436965;429495;437647;425122;429503;429354;429379;429433;427737;444833;427738;437649;419545;425136;418095;437974;437936;437024;419542;429471;437938;437991;437981;444893;420150;437987;429551;425758;429262;429621;436963;436867;450067;450116;450056;421605;450034;447735;422493;450092;421415;420533;447449;437648;422729;429502;430971;427183;421288;433087;425175;418205;426720;447056;429813;418814;419541;437037;428724;429497;444902;444860;429554;429528;444949;444948;444945;444950;437655;444956;437653;437031;444927;444941;437036;444906;429533;444916;450024;434638;429350;429351;429404;429263;429381;429384;429364;447292;447287;429349;450029;450035;421406;450031;422501;445337;421513;427554;422548;421379;417725;422521;416672;434230;447280;417715;417700;417673;443290;426132;437140;447184;429184;437658;439718;429342;426774;426677;426827;426123;426689;426813;426766;426770;426812;426698;426771;434753;419951;426805;426756;427073;437515;427620;436464;435444;437517;435442;418954;427267;430874;430912;424186;427192;429603;437860;424341;434158;434195;447296;437643;418352;437979;435412;443973;437657;419549;429516;438101;450097;421611;421607;447793;450096;443202;430408;450027;420057;437382;437383;421511;414635;414636;418239;437550;437569;421398;447771;450055;417850;450033;436962;450072;422559;450077;422504;422511;437683;421612;450022;424418;437556;422540;421427;421405;422495;447768;437919;422539;450039;450007;444898;416511;450099;422549;422505;426316;426323;450005;450123;450010;450012;422558;421617;447795;447786;437583;425127;427151;447163;441136;440605;442225;442272;442665;443783;443752;443757;443834;447785;417505;429356;430958;436854;426460;427258;443186;427173;426070;430942;426076;437562;429387;427277;419394;427276;422544;447361;447301;447408;447293;447295;447285;447750;417330;437220;430338;421761;416660;437949;418975;419757;429520;449831;420625;445154;447219;447210;447205;429632;437859;437927;437237;437914;437924;437881;447096;426325;443299;426324;436842;449806;420822;436042;435470;435461;423028;435466;450182;418036;428335;434965;435012;434839;434890;436953;436956;417376;436825;436952;436959;434609;434885;436950;445138;445140;445128;445136;445144;445121;435460;445145;445139;418893;437542;445149;445162;445147;435469;435458;445129;434526;434530;445130;445148;445132;437765;437768;437767;437766;435451;434928;434955;435022;435007;435468;447588;447589;435037;436942;435034;435039;424868;450175;445143;444699;426627;435453;435467;434517;450184;424940;435368;430050;435462;445131;445127;450231;445122;445078;438235;434938;434718;434918;434997;434780;434846;422987;434851;430041;430044;445155;434975;436943;435546;418042;444793;434888;435003;434807;435005;450174;436948;435465;426628;447887;447888;447893;447892;447891;447895;447894;450178;450181;435570;435579;435556;435557;435559;435565;435567;435568;424278;434527;434519;434518;435569;435555;435560;435566;435042;434946;449998;426557;418028;449801;417971;430048;420814;449805;420815;449802;435353;420824;449822;421563;449825;447116;426526;426536;426509;426549;426516;426543;426545;426523;426521;426500;426535;426505;426520;426522;426501;436045;426485;426541;426435;426518;426524;426531;426532;426533;426556;435036;435043;435038;435552;435553;435554;435574;435575;435573;435441;434832;418902;435041;435044;436470;435551;435558;435576;435577;435578;435563;435562;435572;435561;436504;437831;437830;417345;430940;430891;430948;430970;430949;429610;426062;426064;437835;437833;430952;426074;424176;426831;430955;429601;418037;424315;426058;418072;426061;426077;424322;424321;424307;416661;424327;424318;444579;434973;436623;426127;424225;424354;437828;437826;426059;422972;437837;425146;427170;426066;444605;437838;437832;426063;437836;417984;427171;426072;436821;430601;424989;430947;424319;426073;426067;436876;418845;434608;426065;427169;430028;429042;420825;426069;426060;449816;436930;436925;436921;449837;428992;449921;449923;449922;449989;438204;449854;427622;437516;429037;429027;445181;429003;449810;417932;429009;445146;435356;435471;437378;427284;427283;418051;

445159;435001;418049;427287;434917;434593;434943;449835;449836;435449;417  
970;434850;434726;434727;434940;434920;427274;434861;418838;434948;434908  
;434926;434714;434847;434879;434856;434857;434870;444523;450105;450043;42  
1627;436946;436954;434988;434911;428286;417936;427455;427438;434610;44508  
3;436914;430604;436120;430690;430696;430708;430605;430623;430043;430042;4  
36931;420810;420811;430559;435564;420823;445125;434899;437546;435448;4208  
13;435550;450185;434977;435023;435000;434936;434898;435446;445124;445126;  
445157;435459;445153;445141;435571;435445;435464;436939;436958;436944;436  
949;436957;436947;436945;421312;434833;445137;437541;445123;445161;445156  
;435450;434956;435019;434900;434976;421316;434909;434995;434996;434860;43  
7547;445151;445135;450176;450180;445152;436044;435035;445134;434972;43545  
4;445133;445120;436819;429174;415649;413572;415159;420322;437989;437920;4  
26290;

Genbank Accession Numbers:

KF430202.1;KY674943.1;KY674942.1;KY674941.1;NC;AY597011.2;DQ415903.1;DQ41  
5896.1;DQ415905.1;DQ415904.1;DQ415910.1;DQ415908.1;DQ415906.1;DQ415907.1;  
KT779556.1;KT779555.1;KF686344.1;KY983584.1;DQ415900.1;DQ415901.1;DQ41590  
9.1;DQ415914.1;HM034837.1;KF850450.2;KF430196.1;MK167038.1;MH940245.1;AY8  
84001.1;KF686338.1;KY674921.1;DQ415902.1;DQ415911.1;DQ415898.1;DQ339101.1  
;DQ415912.1;DQ415897.1;DQ415913.1;DQ415899.1;KF686345.1;KF430200.1;KF6863  
40.1;KF686339.1;KF430201.1;KF686341.1;KF430199.1;KF686342.1;KF686343.1;KF  
686346.1;KT368878.1;KT806054.1;KT806045.1;KT806044.1;KT368868.1;KT368877.  
1;KT368876.1;KT026456.1;KT026454.1;KT368871.1;KU851863.1;MG011351.2;MG011  
357.2;MG011356.1;MG011342.2;KX154687.1;MG757601.1;KT806047.1;MF598618.1;K  
X108946.1;KT225476.2;MF598680.1;MF598604.1;MF598685.1;MF598684.1;MF598646  
.1;MF598657.1;MN507638.1;MK280984.2;MF598692.1;MF598662.1;MF598633.1;MF59  
8612.1;KX108945.1;MF598691.1;MF598661.1;MF598693.1;MF598607.1;MF598613.1;  
MF598622.1;MF598701.1;MF598660.1;MF598627.1;MF598625.1;MF598602.1;MF59862  
8.1;MF598666.1;MF598664.1;MF598611.1;MF598620.1;KT806048.1;KY688118.1;KT8  
06051.1;MF598617.1;KT368888.1;MF598616.1;MF598674.1;MF598675.1;MN481967.1  
;KJ813439.1;MN481969.1;MN481968.1;KM027262.1;KT121574.1;KT121580.1;KT1215  
78.1;KT121581.1;KT121579.1;KT121576.1;KT121575.1;KT121573.1;KT121572.1;KT  
121577.1;MN481966.1;MN481965.1;MN481964.1;MN481976.1;KF961222.1;KF961221.  
1;KF600628.1;KJ156934.1;KT368887.1;KT368825.1;KT368855.1;KT368849.1;KT368  
854.1;KT368853.1;KT368850.1;KT368851.1;KT368857.1;KT368856.1;KT368827.1;K  
T806055.1;KT368867.1;KT368866.1;KU710265.1;KU710264.1;KT368852.1;KT368845  
.1;KT368828.1;KT368843.1;KT368844.1;KT368890.1;KT368824.1;MH013216.1;KY68  
9142.1;KT861627.1;KJ156910.1;KJ156874.1;KJ156942.1;KJ156916.1;MF598665.1;  
MF598678.1;MF598695.1;MF598624.1;MF598663.1;KF600620.1;KF600612.1;KF60063  
0.1;KJ713299.1;KJ361502.1;KF745068.1;KJ361499.1;KJ361501.1;KJ361503.1;KJ3  
61500.1;KY581699.1;KY581698.1;KY581695.1;KY581694.1;KY581696.1;KP209310.1  
;KY581689.1;KP209308.1;KY581686.1;KY581690.1;KY581688.1;KP209306.1;KP2093  
13.1;KY581692.1;KP209307.1;KY581691.1;KP209311.1;KP209309.1;KY673149.1;KY  
581700.1;KY581697.1;MF598667.1;MF598681.1;MF598672.1;MF598639.1;MF598636.  
1;MF598635.1;MF598647.1;KY673148.1;KP719933.1;KX108939.1;KX108941.1;KX108  
938.1;KX108940.1;KX108942.1;KP719932.1;KP719931.1;KU242424.1;KU242423.1;K  
Y581685.1;KY581684.1;KT156561.1;KJ650297.1;KJ650296.1;KJ650295.1;KY581687  
.1;KT156560.1;KP209312.1;KP719930.1;KP719928.1;KP719927.1;KX108937.1;KP71  
9929.1;KF600652.1;KJ156869.1;KF600645.1;KF600647.1;KF600632.1;KF186566.1;  
KF186564.1;KJ156866.1;KF600627.1;KF600644.1;KF600651.1;KF186565.1;KF60063  
4.1;KF186567.1;KM015348.1;KM210278.1;KM210277.1;KJ650098.1;MH259486.1;KT8  
77351.1;KT877350.1;KP223131.1;KJ829365.1;MN481978.1;KM027260.1;MN481975.1  
;MN481973.1;MN481972.1;KM027258.1;MN481974.1;KM027256.1;KM027261.1;MN4819  
77.1;KM027255.1;MN481970.1;MN481971.1;KM027259.1;MK039553.1;MK052676.1;KY  
581693.1;KM027257.1;KT861628.1;MK039552.1;KJ713296.1;KY688119.1;KX108944.  
1;KR011266.1;KR011264.1;KR011263.1;KR011265.1;MH259485.1;KT368875.1;KT368  
831.1;KT368832.1;KT368829.1;KT368830.1;KJ713295.1;KJ713297.1;KJ713298.1;K

F192507.1;NC;KC164505.2;KC667074.1;KJ156952.1;KF600613.1;KJ156881.1;KJ156944.1;KJ156949.1;KF958702.1;KF917527.1;KJ556336.1;NC;LP963762.1;JX869059.2;KJ614529.1;KC776174.1;KX108943.1;MG596803.1;MG596802.1;MG021452.1;MG021451.1;KJ473821.1;MG987421.1;MG987420.1;MF593268.1;KC869678.4;MK564475.1;MK564474.1;MH734115.1;MH734114.1;MK357909.1;MK357908.1;KU740200.1;MG923466.1;MG923468.1;MG923467.1;KJ477102.1;MK967708.1;KJ477103.2;MG923469.1;MG923471.1;MG923470.1;MG923473.1;MG923472.1;MG923479.1;MG923480.1;MG923478.1;MG923481.1;MG923474.1;MG923477.1;MG923476.1;MG923475.1;MF598621.1;MF598696.1;MF598642.1;MF598637.1;MF598679.1;MF598638.1;MF598644.1;MF598669.1;MF598648.1;MF598650.1;MF598689.1;MF598629.1;MF598656.1;MF598649.1;MF598700.1;MF598673.1;MF598717.1;MF598718.1;MF598713.1;MF598706.1;MF598704.1;MF598703.1;MF598705.1;MF598710.1;MF598599.1;MF598596.1;MF598601.1;MF598610.1;MF598600.1;MF598659.1;MF598716.1;MF598714.1;MF598709.1;MF598715.1;MF598722.1;MF598721.1;MF598720.1;MF598719.1;MF598634.1;KT751244.1;MF598690.1;MF598655.1;MF598605.1;MF598626.1;MF598598.1;MF598699.1;MF598711.1;MF598614.1;MF598671.1;MF598630.1;MF598623.1;MF598640.1;MF598653.1;MF598687.1;MF598658.1;MF598654.1;MF598619.1;MF598651.1;MF598712.1;MF598609.1;MF598683.1;MF598708.1;MF598707.1;MF598702.1;MF598608.1;MF598686.1;MF598631.1;MF598643.1;MF598632.1;MF598688.1;MF598698.1;MF598670.1;MF598677.1;MF598652.1;MF598676.1;MF598645.1;MF598597.1;MF598682.1;MF598641.1;MF598697.1;MF598668.1;MF598606.1;MF598615.1;MF598694.1;MF598595.1;MF598603.1;MF598594.1;KT806050.1;KT368863.1;KT368862.1;KT368865.1;KT368864.1;KT368860.1;KT368861.1;KT368859.1;KT368858.1;KT368835.1;KT368838.1;KT368836.1;KT368848.1;KT368847.1;KT368840.1;KT368846.1;KT368841.1;KT368839.1;KT368837.1;KT368842.1;KT368826.1;KT368834.1;KT368889.1;KT368833.1;KT368879.1;KT368869.1;KU851859.1;KT368882.1;KT368883.1;KT368881.1;KT368880.1;KT368884.1;KT368886.1;KT368885.1;KT368874.1;KT368872.1;KT368873.1;MG011340.1;KX154691.1;MG011346.1;MG011344.1;KX154688.1;KX154685.1;MG011347.1;MG011345.2;KX154690.1;KT026455.1;KT026453.1;MG757597.1;KT806049.1;MG280945.1;MG280944.1;MG912609.1;MG912606.1;MG366882.1;MG912598.1;MG366883.1;MG912596.1;MG366881.1;MG912599.1;MG912602.1;MH310910.1;MG366483.1;MH310911.1;MG912601.1;MG912605.1;MG912595.1;MG912603.1;MG912600.1;MG912604.1;MG912597.1;MG011358.2;MH310909.1;MG757596.1;KU851864.1;MG520076.1;MG520075.1;MG546331.1;MG546330.1;MN481984.1;MN481981.1;MG757594.1;MN481979.1;MN481985.1;MN481986.1;MG757595.1;MN481983.1;MN481982.1;MN481980.1;MG757598.1;MH029552.1;MG757602.1;KU851862.1;MG757599.1;KU851861.1;MG757600.1;MG757603.1;KU233363.1;MF741825.1;KU233364.1;MF000457.1;MF741829.1;MF741830.1;MF000460.1;MF000458.1;MF741833.1;KU233362.1;MF741834.1;MF000459.1;MF741835.1;MF741837.1;MF741836.1;MF741832.1;MF741827.1;MF741828.1;MF741831.1;MF741826.1;MG757593.1;KU851860.1;MH306207.1;KX154692.1;KX154693.1;KX154686.1;MG011354.2;MK129253.1;MG011360.1;MG011361.1;MG011362.1;KX154684.1;MK462252.1;MK462256.1;MK462247.1;MK462244.1;MN723543.1;MN723542.1;MK462245.1;MK462246.1;MK462243.1;MK462250.1;MH822886.1;MN120514.1;MN120513.1;MK462254.1;MK462255.1;MN723544.1;MK462253.1;MN365233.1;MN365232.1;MK483839.1;MK462248.1;MK462249.1;MK462251.1;MH310912.1;MH432120.1;MG470650.1;MH371127.1;MG011355.2;MG011353.2;MG011341.1;MG011352.2;MG011343.1;MG757605.1;MG011359.2;MH395139.1;MH454272.1;MG366880.1;MG912607.1;MG912608.1;KX154694.1;MG757604.1;KX154689.1;MG011348.1;MG011350.1;MG011349.1;KT368870.1;KT806046.1;KY688124.1;KY688120.1;KY688122.1;KY688121.1;KT006149.2;KT868870.1;KT374051.1;KT374050.1;KT036372.1;KT036374.1;KT036373.1;KY688123.1;KT326819.1;KT029139.1;MT387202.1;MK796425.1;KT868867.1;KT868877.1;KT868869.1;KT868876.1;KT868872.1;KT868873.1;KT868868.1;KT868866.1;KT868865.1;KT868871.1;KX034093.1;KT868874.1;KX034099.1;KX034100.1;KX034096.1;KT374053.1;KT374052.1;KX034098.1;KU308549.1;KT374055.1;KT374054.1;KX034094.1;KT374057.1;KT374056.1;KT868875.1;KX034097.1;KX034095.1;KT806052.1;KT806053.1;LC063819.1;KJ645659.1;KU982970.1;KU982969.1;LC063815.1;LC063814.1;LC063816.1;LC063818.1;LC063817.1;KR265830.1;KR265802.1;KJ645690.1;KR265821.1;KJ645692.1;KJ645669.1;KJ645675.1;KJ645671.1;LC063813.1;KF804028.1;LQ410512.1;MM872274.1;MK071621.1;KJ645707.1;KJ645706.1;KJ645691.1;KF650

373.1;MA347648.1;LP731410.1;KF650375.1;KF650374.1;KJ645645.1;LC063812.1;KR265827.1;KJ408801.1;KR265768.1;KR265785.1;KR265770.1;KM189367.2;KR265780.1;KJ645699.1;KJ645667.1;KR265810.1;KR265808.1;KR265777.1;LC063810.1;KR265776.1;KR265775.1;KR265825.1;KR265806.1;KR265805.1;KR265788.1;KR265774.1;KJ645700.1;KR265831.1;KR265766.1;MH013462.1;LC063811.1;KJ645656.1;MH243319.1;MK032692.1;MK032689.1;MK482397.1;MK482396.1;KY963963.1;MK032690.1;MH243318.1;MK032691.1;MH243316.1;KR265844.1;KM975736.1;MA347650.1;LP731412.1;LC063825.1;LC063826.1;LC063824.1;KJ645648.1;KJ645652.1;KJ645660.1;KJ645698.1;KR265807.1;KR265795.1;MK071629.1;MK071628.1;MK071627.1;KR265815.1;KR265796.1;KJ645664.1;KJ645689.1;KJ645680.1;KR265763.1;KR265822.1;KY499261.1;KM392229.1;KR078300.1;KM392230.1;KM392231.1;KM392228.1;KM392227.1;KM392226.1;LC063823.1;KF468754.1;LC063822.1;KJ645654.1;KJ184549.1;KF452323.1;KF650370.1;MA347670.1;LP731469.1;MA347672.1;LP731471.1;MA347673.1;LP731472.1;MA347674.1;LP731473.1;MA347676.1;LP731475.1;MA347675.1;LP731474.1;MA347660.1;LP731459.1;KF650372.1;MA347671.1;LP731470.1;KF650371.1;MA347647.1;LP731409.1;KR265846.1;KF468752.1;KY929406.1;KY929405.1;LC063821.1;LC063820.1;LC063828.1;LC022792.1;LC063846.1;LC063845.1;LC063844.1;KJ645702.1;MA347668.1;LP731467.1;MA347669.1;LP731468.1;MA347655.1;LP731435.1;KT591944.1;MA347658.1;MA347653.1;LP731438.1;LP731415.1;MA347656.1;LP731436.1;MA347677.1;LP731476.1;MA347678.1;LP731477.1;MA347657.1;LP731437.1;MA347664.1;LP731463.1;KT860508.1;MA347654.1;MA347652.1;MA347646.1;LP731416.1;LP731414.1;LP731408.1;MA347666.1;LP731465.1;MA347679.1;LP731478.1;MA347667.1;LP731466.1;MA347659.1;LP731439.1;MA347665.1;LP731464.1;MA347663.1;LP731462.1;MH006958.1;MH006962.1;MH006960.1;KJ645635.1;LQ410514.1;MM872276.1;LQ110721.1;KM975739.1;KM975738.1;LT898445.1;LM645057.1;LM645058.1;LT898447.1;KR003452.1;LT900500.1;LT898416.1;KR011756.1;LT898444.1;LT898425.1;LT898414.1;MN056942.1;MH593900.1;KX289955.1;KY019624.1;KY019623.1;KY111278.1;LT898420.1;LT898408.1;LT898415.1;LT898426.1;LT898439.1;LT900499.1;LT898436.1;LT898435.1;LT898413.1;LT900502.1;LT898441.1;LT898418.1;LT898433.1;LT898440.1;LT898412.1;LT898411.1;LT898438.1;LT898427.1;LT900501.1;KU297956.1;LT898417.1;LT900498.1;LT898430.1;LT898410.1;LT898446.1;LT898423.1;LT898443.1;LT898432.1;LT898409.1;LT898431.1;LT898421.1;KX883635.1;KU847996.1;KR265759.1;KM392232.1;KJ645696.1;KJ645695.1;MK071626.1;MK071631.1;MK071625.1;MK071638.1;MK071637.1;MK071636.1;MK071639.1;MK071630.1;MK071619.1;MK071635.1;MK071633.1;MK071634.1;MK071632.1;MK071620.1;KM975740.1;KM975741.1;MK071624.1;KJ645704.1;MH052681.1;KJ645655.1;KM403155.1;KJ399978.1;KR265760.1;LC063847.1;KJ645649.1;LQ410515.1;MM872277.1;LQ110722.1;KR265761.1;KP688354.1;MK673545.1;KF452322.1;LC063827.1;KJ623926.1;KR873431.1;KR873434.1;KR873435.1;KY825241.1;LY646142.1;KY825240.1;KY825243.1;LY646143.1;KY825242.1;KJ662670.1;MH052689.1;MF281416.1;KJ588064.1;KJ588063.1;KJ588062.1;KR265799.1;KJ645705.1;KJ645658.1;KU982973.1;KU982972.1;KJ645668.1;KJ645676.1;KJ645672.1;KJ645681.1;KJ645682.1;KJ645663.1;MK071623.1;KR265828.1;KR265778.1;KR265834.1;KJ645703.1;KR265826.1;KR265823.1;KJ645685.1;KJ645684.1;KJ645693.1;KR265781.1;LC063833.1;LC063835.1;LC063834.1;KP202365.1;KR265843.1;KR265793.1;KU982971.1;KP403954.1;KR265786.1;MH891586.1;MH891585.1;MH052682.1;MH891587.1;MH891584.1;MH891590.1;MH891589.1;MH052685.1;MH052684.1;MH052688.1;MH006963.1;MH004421.1;MH013464.1;MH013463.1;MH004419.1;KJ645701.1;KJ645640.1;KJ645651.1;KR265833.1;KR265762.1;MG334555.1;MG334554.1;KJ645650.1;KR265782.1;KR265820.1;KR265789.1;KR265779.1;KR265790.1;KU982975.1;KU982977.1;KU982976.1;KF272920.1;MA741913.1;LQ905109.1;LY411681.1;LQ410511.1;LQ068537.1;MM872273.1;LC063836.1;KR265769.1;KP641661.1;KJ645638.1;KF267450.1;KU558702.1;KM052365.1;MH056658.1;MH056657.1;KJ778616.1;KJ645697.1;KJ645642.1;KJ645644.1;KR265845.1;KR265824.1;MA741906.1;LY411674.1;LQ068527.1;LQ410516.1;MM872278.1;KU982966.1;MH004414.1;MH004413.1;MH004412.1;MH013466.1;MH013465.1;MH004420.1;KR265819.1;KR265767.1;KU982968.1;KU982967.1;KJ645639.1;KJ645637.1;KR265812.1;KU569509.1;KR265792.1;MH006959.1;MH006965.1;MH006957.1;MH004416.1;MH004418.1;MH004417.1;MH006964.1;MH004415.1;MH006961.1;KR265797.1;KJ645643.1;MK071622.1;KJ645708.1;KJ778615.1;KR265791.1;KR26

5800.1;KR265772.1;KF468753.1;LC063838.1;LC063839.1;KR265773.1;LC063840.1;LC063843.1;LC063842.1;LC063841.1;KJ645646.1;KM975735.1;MA347661.1;LP731460.1;LQ410513.1;MM872275.1;MA347649.1;LP731411.1;KJ645647.1;KJ645666.1;MF373643.1;KR265818.1;KR265798.1;KJ645687.1;KJ645677.1;KJ645674.1;KJ645678.1;KJ645662.1;KJ645661.1;KU982980.1;KR265814.1;KR265794.1;KR265816.1;KR265771.1;KR265787.1;KJ645679.1;KJ645686.1;KU982974.1;KJ645673.1;KM077139.1;KR265804.1;KJ645688.1;KR265764.1;KR265783.1;KR265813.1;LC063837.1;KR265832.1;KR265811.1;KR265829.1;MH107321.1;MH726371.1;MH061342.1;KY007139.1;MH726370.1;KM242131.1;MH726376.1;KM609205.1;MF782687.1;MF807952.1;MN114121.1;KX058033.1;KX058032.1;KX058031.1;KC196276.1;KR095279.1;KP890336.1;MH726382.1;MH726381.1;KM609203.1;MK841495.1;MK841494.1;MH726379.1;MH726378.1;MH726377.1;MH726367.1;KJ020932.1;KM609206.1;KF760557.2;KJ526096.1;KX580953.1;KJ196348.1;KF840537.1;MH726362.1;JX088695.1;MN037494.1;MF782686.1;MF462814.1;MH726365.1;MH726364.1;MH726363.1;KC210147.1;KM609207.1;MH726366.1;KU975389.1;KJ777678.1;KJ777677.1;MG546687.1;KX066126.1;KT323980.1;MH910099.1;KM609209.1;JN825712.1;KR818833.1;KM609208.1;MH726375.1;MH726374.1;MG837011.1;MH726369.1;MH726368.1;KU558701.1;MH107322.1;MH726380.1;MN594506.1;MH117940.1;KX064280.1;KM609211.1;KM609210.1;KY007140.1;KX812523.1;KY070587.1;MG546689.1;MG837012.1;KX550281.1;MK409659.1;MK409658.1;MK409657.1;MH726383.1;KX812524.1;MK606369.1;MH061340.1;MK644602.1;MK690502.1;MF346935.1;MK862249.1;MH061341.1;MK644605.1;MH581489.1;MK250953.1;MH061343.1;MH061338.1;MH061337.1;MK140814.1;MK140813.1;MK140812.1;MK140811.1;MK702008.1;MF375374.1;MK138516.1;MH061336.1;KY649107.1;KR809885.1;MF807951.1;KX981440.1;KT199103.1;KU252649.1;KX016034.1;KR153326.1;KR153325.1;MH726372.1;KM609213.1;KY793536.1;KM609212.1;MG546690.1;MG546688.1;JQ282909.1;KC140102.1;MK606368.1;KT941120.1;MK644603.1;MH726407.1;MH726406.1;MH726404.1;MH726403.1;MG983755.1;MH726402.1;MK644601.1;MK138353.1;KY928065.1;MH726405.1;MH061339.1;MH708243.1;MF737355.1;KR061458.1;JQ023161.1;JN547228.1;MF577027.1;KU182966.1;MK472067.1;NC;KF430219.1;KY799179.1;NC;KJ473808.1;MN611522.1;NC;EF203064.1;EF203065.1;EF203067.1;EF203066.1;MF094685.1;MF094686.1;MF094687.1;MF094688.1;MH615810.1;MH539766.1;MF769444.1;MF769443.1;MF769416.1;MF094681.1;MF769441.1;MF769417.1;MK651076.1;MF094684.1;MF769418.1;MF769419.1;MG605091.1;MG605090.1;MT199592.1;MT199591.1;MF769424.1;MG557844.1;MK994936.1;MK994937.1;MK994935.1;MK994934.1;MF769425.1;MF769423.1;MF769422.1;MF769421.1;MF769420.1;MF769442.1;MF769440.1;MF769439.1;MF769438.1;MF769435.1;MF769434.1;MF769433.1;MF769432.1;MF769431.1;MF769430.1;MF769429.1;MF769427.1;MF769426.1;MF094683.1;MF769428.1;MF769437.1;MF769436.1;MF094682.1;MH697599.1;MF167434.1;MK977618.1;MF370205.1;MG742313.1;NC;JQ065048.1;NC;JQ065047.1;NC;JQ065049.1;MH532440.1;MG812376.1;MG812375.1;MG812378.1;MG812377.1;NC;KX998969.1;KX118627.1;KU051649.1;MM872326.1;KU051641.1;MM872325.1;KU984334.1;MM872327.1;MN025260.1;KX834352.1;KX834351.1;KX443143.2;LC216915.1;MK572803.1;MK330604.1;MK211169.1;MK355396.1;MK993519.1;MK330605.1;MK005882.1;MF095123.1;KT266822.1;MM872323.1;KY513724.1;MF041982.1;MG242062.1;MN249445.1;MF431743.1;KY293677.1;KY293678.1;MH025762.1;MH025764.1;MH025763.1;MF948005.1;KU981060.1;KU981059.1;MM872322.1;MM872321.1;KU981062.1;KU981061.1;KP757892.1;MM872318.1;KT021234.1;MM872317.1;LC216914.1;KU665558.1;KR131621.1;MM872316.1;MH715491.1;KY065120.1;KY363867.1;MF280390.1;MG832584.1;MH708124.1;MH708125.1;MH708123.1;KP757891.1;MM872319.1;KY363868.1;KJ584355.1;MM872295.1;KR265857.1;MM872294.1;KR265856.1;MM872293.1;KR265865.1;MM872283.1;KR265854.1;MM872285.1;KR265855.1;MM872286.1;KR150443.1;MM872287.1;KJ601779.1;KJ481931.1;MM872284.1;KR265858.1;MM872290.1;KR265853.1;MM872288.1;KJ567050.1;MM872289.1;LC260039.1;LC260040.1;KJ620016.1;MM872291.1;LC260043.1;KT381613.1;MM872292.1;LC260041.1;LC260045.1;LC260038.1;KM820765.1;MM872282.1;KY926512.1;KR265851.1;MM872308.1;KR265864.1;MM872309.1;KJ584358.1;MM872307.1;KX022603.1;MM872306.1;KX022604.1;MM872305.1;KX022605.1;MM872304.1;KX022602.1;MM872303.1;KJ601780.1;KR265863.1;MM872314.1;KJ769231.1;KR265862.1;MM872313.1;KJ462462.1;KJ584356.1;MM872312.1;KR265848.1;MM872310.1;KR265847.1;MM872311.1;KJ584357.1;MM872315.1;LC260042.1;KP98

1395.1;KM012168.1;KY364365.1;MG837131.1;MG837130.1;KJ601778.1;KJ601777.1;KJ584359.1;MM872298.1;KR265861.1;MM872297.1;KR265860.1;MM872296.1;KR265852.1;MM872299.1;KR265859.1;MM872300.1;KR265850.1;MM872302.1;KR265849.1;MM872301.1;LC260044.1;KJ569769.1;KY354364.1;KY354363.1;KY513725.1;JQ065042.2;KP757890.1;MM872324.1;MF642323.1;MF642324.1;MF642325.1;MF642322.1;NC;JQ065043.2;MF431742.1;KT336560.1;MM872320.1;NC;NC;NC;FJ376621.1;FJ376620.1;NC;NC;JQ065044.1;LC364342.1;LC364343.1;LC364344.1;NC;KF793825.1;KF793826.1;KF793824.1;MK359255.1;NC;KX302869.1;KX236006.1;KX236011.1;KX302864.1;KX252784.1;KX252790.1;KX252783.1;KX252785.1;KX252788.1;KX302860.1;KX252777.1;KX364296.1;KX252789.1;KX219791.1;HM245923.1;KX219792.1;KX375805.1;KX259254.1;KX236012.1;MF508703.1;JX840411.1;KU317090.1;KX236003.1;KX252773.1;KJ128295.1;KX219799.1;KY421673.1;KX372250.1;KX236008.1;KF574761.1;KX348115.1;MG197727.1;KX434789.1;KP036505.1;KP118886.1;KX640829.1;KF411041.1;KY407556.1;KY407558.1;KY407557.1;KU361187.1;HQ850618.1;HQ848267.1;KP118894.1;KC119407.1;KC013541.1;MK142676.1;MH924835.1;JX195176.1;KP118890.1;KP118889.1;MK032178.1;MK032177.1;MK032180.1;MK032179.1;MN307884.1;KX077987.1;KJ435283.1;KF411040.1;KY620116.1;KP790146.1;KP790145.1;KP790144.1;MG517474.1;KT946798.1;KP868572.1;KP790143.1;KX236004.1;KX364297.1;KX302870.1;KX252776.1;KX252787.1;KX219800.1;KX236013.1;KX364290.1;KU900742.1;KU900738.1;JF732903.1;KX185058.1;KX259257.1;KX252781.1;KX219795.1;MH020185.1;KX400753.1;KX348117.1;KX236000.1;KX259248.1;KX219793.1;KX247130.1;KX375807.1;KX364291.1;KX275392.1;KX275393.1;KX252786.1;KX302875.1;KC136209.1;KX236014.1;KX247127.1;KX364294.1;KX219798.1;MK032181.1;KX434788.1;KX259256.1;KX252774.1;KX252775.1;KX247128.1;KX247129.1;KX219801.1;KX375806.1;KX259255.1;KX364292.1;KX372249.1;KX302868.1;KX302874.1;KX302871.1;KX302867.1;KX425847.1;KX302873.1;KY421672.1;KX275391.1;KX302865.1;KX302861.1;KX275390.1;KX236015.1;KX364295.1;KX348116.1;KX252780.1;KX364293.1;JX195175.1;KX259252.1;KX389094.1;KX236016.1;MK618759.1;KM586818.1;KF853202.1;KX259253.1;KX259249.1;KX236005.1;KX259251.1;KF663561.1;KT750258.1;KX364299.1;KX302862.1;KX219794.1;KX259250.1;KX236009.1;KX364300.1;KX236002.1;KX236007.1;KX302872.1;KX302863.1;KX236010.1;KX275394.1;KX219796.1;KX219797.1;KX252772.1;KX252778.1;KX252782.1;KX252791.1;KX302866.1;KX375808.1;KX185059.1;KX185056.1;AY338732.1;KX185057.1;KM213963.1;AY319651.1;EU526388.1;KT852992.1;KR608272.1;AY646283.1;KX252779.1;KX364298.1;KX348114.1;KX434790.1;KX236001.1;MK581205.1;KY933090.1;KY933089.1;EU637854.1;MN128088.1;MN128086.1;MG448607.1;JF330898.1;KX266757.1;DQ646405.2;MN128087.1;KU556805.1;KF931628.1;KF460437.1;KU556806.1;KU556807.1;KU556804.1;MK581201.1;MK581200.1;FJ904722.1;DQ001339.1;AY692454.1;NC;M95169.1;AJ311317.1;DQ001338.1;KR902510.1;MK937832.1;MK937828.1;AY641576.1;DQ834384.1;GQ504724.1;KJ425504.1;MH539771.1;AY851295.1;FJ904720.1;MK937830.1;FJ904723.1;MH539772.1;MA765825.1;LY505956.1;LY611929.1;LP994923.2;MM207204.1;MK728875.1;FJ904721.1;KJ435286.1;JF828980.1;JF274479.2;GU393337.1;GU393336.1;MH779859.1;MH779860.1;MH779856.1;MH779857.1;MH779858.1;GU393338.1;GU393334.1;JQ977697.1;MK618758.1;KU900744.1;KU900740.1;KU900739.1;KU900741.1;KU900743.1;JQ977698.1;MF924725.1;MF924724.1;EU022526.1;GQ427175.1;EU022525.1;GQ427173.1;NC;EU095850.1;GQ427176.1;GQ427174.1;LN610099.1;KR822424.1;KR231009.1;FN430415.1;MG021194.1;MH878976.1;MF421320.1;MF421319.1;KP780179.1;JX195178.1;JX195177.1;MH021175.1;KX258195.1;MG913342.1;KY626044.1;KC506155.1;MG738154.1;MN512438.1;MN512435.1;MN512434.1;MN512437.1;MN512436.1;MK878536.1;GU393331.1;FJ904714.1;AY514485.1;FJ904713.1;GU393333.1;FJ904718.1;FJ904717.1;FJ904716.1;FJ904719.1;KF696629.1;KP868573.1;GQ504720.1;EU418976.1;LQ302036.1;MN566147.1;KY776701.1;KY776700.1;EU418975.1;GQ504721.2;GU393332.1;GQ504723.1;GQ504722.1;FJ904715.1;MN599049.1;KJ425485.1;KT736032.1;KP343691.1;KU356856.1;KJ425496.1;MG913343.1;KJ425509.1;KJ425503.1;MK937831.1;KJ425500.1;EU714028.1;KJ435284.1;KJ425511.1;FJ807652.1;KJ425502.1;JF330899.1;KJ425507.1;KJ425491.1;KJ425487.1;KJ425488.1;KJ425505.1;KJ425495.1;KJ425494.1;KJ425510.1;KJ425499.1;KJ425492.1;KJ425512.1;FJ888351.1;KT203557.1;GU393335.1;KJ425501.1;KT736031.1;KJ435285.1;MK071267.1;MG763935.1;JF828981.1;KJ425493.1;KJ425490.1;MK937829

.1;KJ425506.1;KJ425486.1;KJ425498.1;KY805845.1;KY588134.1;KY273667.1;MK937833.1;KY626045.1;KY588135.1;KJ425508.1;KJ425489.1;GQ504725.1;EU817497.1;KJ425497.1;KJ135013.1;KP036502.1;KP118885.1;KP118881.1;KP118884.1;KP118887.1;KP118892.1;KP036503.1;KP118882.1;KF377577.1;KP118891.1;KP118893.1;KPO36504.1;KP118880.1;KP118888.1;KP118883.1;MK581202.1;MK581204.1;MK581203.1;MK581208.1;MK581207.1;KY047602.1;MN262644.1;KY805846.1;MG233398.1;MG738155.1;KT886454.1;MK581206.1;JQ088078.1;FN430414.1;KP662631.1;KX272465.1;KC008600.1;JF705860.1;DQ288927.1;MH181793.1;EU714029.1;KF663560.1;MK644086.1;JF893452.2;KY799582.1;MK423877.1;MK423876.1;KX721498.1;HM245924.1;MN096598.1;KU361188.1;MK574043.1;MK574042.1;KF663559.1;MK217374.1;MK329221.1;MK309398.1;MK217373.1;MK217375.1;MK217372.1;KF668605.1;MF882923.1;MN197549.1;JX897900.1;KM454473.1;MK204411.1;MK204393.1;JN874561.1;JN874560.1;NC;JN874562.1;LC061274.1;LC061273.1;EF446615.1;LC061272.1;KY419106.1;KY419113.1;KY419111.1;KY419107.1;KY419109.1;KY419112.1;KY419104.1;KY419110.1;KY419105.1;KY419103.1;KY994645.1;MF083115.1;DQ011855.1;KF530092.1;KY014281.1;KF530080.1;KF530072.1;KF530064.1;KF530078.1;KY014282.1;KU131570.1;KY967360.1;MN026165.1;MK327281.1;MF314143.1;KP198611.1;KP198610.1;KF923896.1;KF923906.1;KF530090.1;KF530097.1;KF530074.1;KF530075.1;KF530062.1;KF530059.1;KF530066.1;KF530061.1;KF530065.1;KF530073.1;KF530085.1;KF530087.1;KF530093.1;KF530060.1;KF530077.1;KF530086.1;KF530083.1;KF530070.1;KF530081.1;KF530068.1;KX344031.1;KX538965.1;KX538977.1;KX538969.1;KX538975.1;KF923897.1;KF923903.1;KX538968.1;KX538973.1;KX538974.1;KX538971.1;KX538967.1;MK303621.1;MK303623.1;MK303624.1;MK303619.1;MH685718.1;MF374983.2;MF374984.1;MH121121.1;KY369907.1;MF374985.2;KY967358.1;MG197723.1;KY369906.1;KY967361.1;KY967359.1;KY983585.1;KY983583.1;KY684759.1;KY983588.1;KY369905.1;MN310478.1;MN306053.1;MN306042.1;MN306036.1;MN306041.1;MK303620.1;MG197712.1;MG197717.1;MG197716.1;MG197722.1;MG197715.1;MG197710.1;MG197713.1;KF923902.1;KY967356.1;KX538978.1;MK303622.1;KX538979.1;KX538972.1;KX538976.1;KX538966.1;KX538964.1;KF923904.1;MN026164.1;MG977444.1;MG977446.1;MG977450.1;MG977448.1;MG977452.1;MG977445.1;MG977447.1;MG977449.1;MG977451.1;KX538970.1;KF923910.1;KF923923.1;KF923924.1;KF923918.1;KF923893.1;KF923922.1;KF923925.1;KJ958219.1;KJ958218.1;KF923909.1;KF923916.1;KF923908.1;KF923921.1;KF923919.1;KF923911.1;KF923914.1;KF923907.1;KF923894.1;KF923891.1;KF923915.1;KF923913.1;KF923920.1;KF923901.1;KF923917.1;KF923912.1;KF923892.1;KF923890.1;KY554974.1;KY554975.1;KY674920.1;KY674917.1;KY554972.1;KY554973.1;KY674918.1;KF923895.1;KF923886.1;KF923898.1;AY903459.1;KF923887.1;KF923888.1;KF923889.1;MN310476.1;MN306043.1;MK303625.1;MG197709.1;MG197711.1;MG197720.1;MG197721.1;MG197718.1;MG197719.1;MG197714.1;JN129835.1;AY903460.1;JN129834.1;KF923905.1;KF923899.1;KF923900.1;KF530099.1;KF530063.1;KF530069.1;KF530088.1;KF530076.1;KF530091.1;KF530071.1;KF530079.1;KF530094.1;KF530089.1;KF530082.1;KF530096.1;KF530095.1;KF530067.1;KF530084.1;KF530098.1;AY391777.1;AY585229.1;NC;AY585228.1;FJ938067.1;FJ415324.1;KU558923.1;KU558922.1;KU886219.1;FJ425184.1;FJ425186.1;FJ425185.1;FJ425190.1;FJ425189.1;FJ425188.1;FJ938066.1;EF424619.1;FJ425187.1;EF424615.1;MH043953.1;MH043952.1;MH043955.1;MH043954.1;EF424621.1;EF424624.1;EF424622.1;EF424623.1;LC494172.1;LC494161.1;LC494142.1;LC494144.1;LC494143.1;LC494177.1;LC494126.1;LC494158.1;LC494128.1;LC494183.1;LC494188.1;LC494192.1;LC494184.1;LC494187.1;LC494186.1;LC494190.1;LC494191.1;LC494185.1;LC494189.1;LC494178.1;LC494179.1;LC494153.1;LC494150.1;LC494148.1;LC494151.1;LC494152.1;LC494149.1;LC494147.1;LC494182.1;LC494180.1;LC494181.1;LC494159.1;LC494137.1;LC494176.1;LC494175.1;LC494157.1;LC494127.1;LC494146.1;LC494145.1;LC494141.1;LC494155.1;LC494154.1;LC494136.1;LC494135.1;LC494134.1;LC494174.1;LC494139.1;LC494163.1;LC494162.1;LC494164.1;LC494165.1;LC494129.1;LC494168.1;LC494171.1;LC494170.1;LC494132.1;LC494131.1;LC494156.1;LC494133.1;LC494130.1;LC494167.1;LC494166.1;LC494169.1;LC494173.1;LC494160.1;LC494140.1;LC494138.1;EF424616.1;EF424618.1;EF424617.1;EF424620.1;FJ938065.1;FJ938064.1;AF391542.1;NC;DQ915164.2;DQ811784.2;FJ938063.1;MG518518.1;KX982264.1;MG757138.1;MG757140.1;MG757139.1;MG757141.1;MG757142.1;KF906251.1;KF906250.



1;KF906249.1;MF593476.1;MN514962.1;MN514967.1;MN514965.1;MN514964.1;MN514966.1;MN514963.1;MH810163.1;AB354579.1;U00735.2;AF220295.1;KX432213.1;NC;MH687975.1;KF294357.1;KM349743.1;NC;KM349744.1;FJ647224.1;AB551247.1;FJ647227.1;FJ647226.1;JX169866.1;JX169867.1;FJ647219.1;FJ647222.1;AF208067.1;NC;FJ884686.1;FJ884687.1;MF618253.1;KF268337.1;KF268338.1;KF268339.1;KP887098.1;MF618252.1;FJ647221.1;FJ647220.1;FJ647218.1;AY700211.1;FJ647225.1;KF268336.1;AF208066.1;AF207902.1;AF201929.1;FJ647223.1;JQ173883.1;GU593319.1;MF416379.1;JF792616.1;NC;JF792617.1;KF294372.1;KF294371.1;KF294370.1;KF430202.1;KY674943.1;KY674942.1;KY674941.1;KF686339.1;KF686340.1;KF430201.1;KF686341.1;KF430199.1;KF686342.1;KF686343.1;KF686346.1;KF686345.1;KF430200.1;KF850450.2;KF430196.1;HM034837.1;DQ415903.1;NC;AY597011.2;DQ415905.1;DQ415904.1;DQ415908.1;DQ415910.1;DQ415906.1;DQ415907.1;DQ415900.1;KT779556.1;KT779555.1;KF686344.1;KY983584.1;DQ415901.1;DQ415909.1;DQ415914.1;DQ415896.1;DQ415898.1;DQ339101.1;DQ415912.1;DQ415897.1;DQ415899.1;DQ415913.1;MK167038.1;DQ415911.1;MH940245.1;AY884001.1;KF686338.1;KY674921.1;DQ415902.1;KU182965.1;KJ473822.1;MH002338.1;MH002337.1;DQ648794.1;MN611519.1;EF065506.1;EF065507.1;NC;EF065505.1;EF065508.1;MH002339.1;MK907287.1;MK907286.1;MK679660.1;NC;KC545383.1;KC545386.1;NC;EF065509.1;MN611520.1;MH002342.1;MH002340.1;MH002341.1;KJ473820.1;EF065510.1;EF065512.1;EF065511.1;MG596802.1;MG596803.1;MG021452.1;MG021451.1;KX442564.1;MG987421.1;MG987420.1;KX442565.1;LC469308.1;KJ473821.1;NC;KX574227.1;MF593268.1;KC869678.4;KT368824.1;KF961221.1;KF961222.1;KF600628.1;KJ156934.1;KT368825.1;KT368887.1;KT368890.1;KT368852.1;KT806055.1;KT368867.1;KT368866.1;KU710265.1;KU710264.1;KT368845.1;KT368828.1;KT368844.1;KT368843.1;KT368857.1;KT368856.1;KT368827.1;KT368855.1;KT368851.1;KT368849.1;KT368854.1;KT368853.1;KT368850.1;MF598665.1;MF598678.1;MF598650.1;MF598629.1;MF598689.1;MF598656.1;MF598653.1;MF598640.1;MF598673.1;MF598634.1;MF598599.1;MF598600.1;MF598610.1;MF598596.1;MF598601.1;MF598713.1;MF598706.1;MF598704.1;MF598703.1;MF598710.1;MF598718.1;MF598705.1;MF598716.1;MF598709.1;MF598714.1;MF598659.1;MF598717.1;MF598630.1;MF598671.1;MF598699.1;MF598711.1;MF598614.1;MF598598.1;MF598626.1;MF598690.1;MF598655.1;MF598605.1;MF598715.1;MF598722.1;MF598721.1;MF598720.1;MF598719.1;KT751244.1;MF598700.1;MF598687.1;MF598658.1;MF598654.1;MF598619.1;KX108939.1;KX108941.1;KX108938.1;KX108940.1;KX108942.1;KP719933.1;KP719932.1;KP719931.1;KU242424.1;KU242423.1;KP209308.1;KY581689.1;KY581686.1;KY581690.1;KY581688.1;KP209313.1;KP209307.1;KY581692.1;KY581691.1;KP209311.1;KP209309.1;KP209306.1;KY581700.1;KY581697.1;KY673149.1;MF598637.1;MF598667.1;MF598681.1;MF598672.1;KY673148.1;MF598647.1;MF598635.1;MF598639.1;MF598636.1;KP209310.1;KY581696.1;KP209312.1;KT156560.1;KY581687.1;KX108937.1;KP719929.1;KP719928.1;KP719927.1;KP719930.1;KT156561.1;KJ650297.1;KJ650295.1;KJ650296.1;KY581684.1;KY581685.1;KJ361502.1;KJ361501.1;KJ361499.1;KF745068.1;KJ361500.1;KJ361503.1;KF600645.1;KF600632.1;KF600647.1;KF186564.1;KJ156866.1;KF600627.1;KF600644.1;KF186566.1;KF600651.1;KF600634.1;KF186565.1;KF186567.1;KJ156869.1;KM015348.1;KM210278.1;KM210277.1;KF600652.1;KF600630.1;KJ713299.1;KY581699.1;KY581698.1;KY581695.1;KY581694.1;MF598621.1;KJ713297.1;KJ713298.1;KJ713296.1;KY688119.1;KR011266.1;KR011264.1;KR011263.1;KR011265.1;KX108944.1;MH259485.1;KT368875.1;KT368831.1;KT368832.1;KT368829.1;KT368830.1;KJ713295.1;MH259486.1;KT877351.1;KT877350.1;KY581693.1;KM027257.1;KT861628.1;MK039552.1;MK039553.1;MK052676.1;MN481975.1;MN481973.1;MN481978.1;KM027260.1;KM027258.1;MN481972.1;MN481971.1;KM027259.1;MN481974.1;MN481977.1;KM027255.1;KM027261.1;KM027256.1;MN481970.1;KJ829365.1;KP223131.1;KJ650098.1;MF598663.1;KF600620.1;KF600612.1;NC;JX869059.2;LP963762.1;LG076105.1;LG076104.1;LG076103.1;KJ614529.1;KC776174.1;KX108943.1;MK564475.1;MK564474.1;MH734115.1;MH734114.1;MK357909.1;MK357908.1;KU740200.1;MG923466.1;MG923468.1;MG923467.1;MK967708.1;KJ477103.2;MG923473.1;MG923472.1;MG923474.1;MG923481.1;MG923477.1;MG923476.1;MG923475.1;MG923479.1;MG923480.1;MG923478.1;MG923469.1;MG923471.1;MG923470.1;KJ477102.1;KF192507.1;NC;KC164505.2;KC667074.1;KF600613.1;KJ156881.1;KJ156944.1;KJ156949.1;KF958702.1;KF917527.1;KJ556336.1;KJ156952.1

;MF598644.1;MF598669.1;MF598648.1;MF598642.1;MF598696.1;MF598649.1;MF598638.1;MF598679.1;MF598695.1;MF598624.1;MF598641.1;MF598597.1;MF598682.1;MF598645.1;MF598676.1;MF598670.1;MF598677.1;MF598652.1;MF598697.1;MF598698.1;MF598686.1;MF598668.1;MF598606.1;MH306207.1;MG757593.1;KU851860.1;MN481980.1;MN481982.1;MN481983.1;MN481986.1;MG757595.1;MN481985.1;KU851862.1;MG757602.1;MG757598.1;MH029552.1;MG757603.1;MG757600.1;KU851861.1;MG757599.1;MN481979.1;MG757596.1;MG757594.1;MN481984.1;MN481981.1;KU851864.1;MG520076.1;MG520075.1;MG546331.1;MG546330.1;MF741832.1;MF741827.1;MF741831.1;MF741828.1;MF741826.1;MF741829.1;MF741830.1;MF000460.1;MF000458.1;MF741834.1;MF741833.1;KU233362.1;MF000459.1;MF741835.1;MF741837.1;MF741836.1;KU233363.1;MF741825.1;MF000457.1;KU233364.1;KX154694.1;KX154693.1;KX154692.1;KX154686.1;MG011354.2;MG366880.1;MG912607.1;MG912608.1;MH395139.1;MH454272.1;MG011359.2;KX154684.1;MK129253.1;MH310912.1;MH432120.1;MG757605.1;MG011341.1;MG011343.1;MG011352.2;MG470650.1;MH371127.1;MG011353.2;MG011355.2;MK462251.1;MK462252.1;MK462244.1;MK462246.1;MK462245.1;MK462243.1;MN723542.1;MN723543.1;MK462256.1;MK462247.1;MK462249.1;MH822886.1;MK462254.1;MK462255.1;MN723544.1;MK462253.1;MN120513.1;MN120514.1;MN365233.1;MN365232.1;MK462248.1;MK483839.1;MK462250.1;MG011362.1;MG011360.1;MG011361.1;MG280945.1;MH310909.1;MG280944.1;MH310911.1;MG366483.1;MH310910.1;MG912602.1;MG912603.1;MG912601.1;MG912597.1;MG912609.1;MG912606.1;MG366882.1;MG912598.1;MG366881.1;MG912596.1;MG912599.1;MG366883.1;MG912604.1;MG912600.1;MG912595.1;MG912605.1;MG011358.2;KT368879.1;KT368869.1;KU851859.1;KT368883.1;KT368882.1;KT368881.1;KT368880.1;KT368884.1;KT368886.1;KT368885.1;KT368874.1;KT368872.1;KT368873.1;KT026455.1;KT026453.1;MG757597.1;KT806049.1;MG011340.1;KX154691.1;KX154688.1;MG011346.1;MG011344.1;KX154685.1;MG011345.2;KX154690.1;MG011347.1;KT368826.1;KT368834.1;KT368889.1;KT368833.1;KT368848.1;KT368840.1;KT368841.1;KT368846.1;KT368842.1;KT368839.1;KT368837.1;KT368847.1;KT368838.1;KT368836.1;KT368835.1;KT368863.1;KT368862.1;KT368865.1;KT368864.1;KT368860.1;KT368861.1;KT368858.1;KT368859.1;KT806050.1;KT806053.1;KT806052.1;KT368878.1;KT806054.1;KT806044.1;KT806045.1;MF598628.1;KX108946.1;KT225476.2;MF598604.1;MF598680.1;MF598657.1;MF598685.1;MF598684.1;MF598646.1;MN507638.1;MK280984.2;MF598692.1;MF598662.1;MF598633.1;MF598661.1;MF598691.1;MF598693.1;MF598612.1;KX108945.1;MF598664.1;MF598666.1;MF598613.1;MF598660.1;MF598701.1;MF598622.1;MF598627.1;MF598625.1;MF598607.1;MF598595.1;MF598594.1;MF598603.1;MF598631.1;MF598643.1;MF598688.1;MF598632.1;MF598611.1;MF598615.1;MF598694.1;MF598618.1;MF598602.1;KT806047.1;KT368877.1;KT368876.1;KT368868.1;KT026456.1;KT026454.1;KT368871.1;KU851863.1;KX154687.1;MG011342.2;MG757601.1;MG011348.1;MG011350.1;MG011349.1;KX154689.1;MG757604.1;MG011351.2;MG011357.2;MG011356.1;KT368870.1;KT868870.1;KT036372.1;KT036374.1;KT036373.1;KT374051.1;KT374050.1;KY688123.1;KT006149.2;KT868867.1;KT868877.1;KT868876.1;KT868872.1;KT868871.1;KT868869.1;KT868873.1;KT868868.1;KT868866.1;KT868865.1;KT374055.1;KT374054.1;KU308549.1;KX034099.1;KX034098.1;KX034096.1;KT374053.1;KT374052.1;KT868874.1;KX034100.1;KX034093.1;KX034095.1;KT374057.1;KT374056.1;KT868875.1;KX034094.1;KX034097.1;MK796425.1;KT326819.1;KT029139.1;KT806046.1;KY688124.1;KY688120.1;KY688121.1;KY688122.1;KY688118.1;KT806048.1;MF598617.1;KT806051.1;KT368888.1;MF598674.1;MF598620.1;MF598616.1;MF598651.1;MF598683.1;MF598708.1;MF598707.1;MF598702.1;MF598609.1;MF598623.1;MF598608.1;MF598712.1;MF598675.1;MN481966.1;MN481965.1;MN481964.1;MN481976.1;KT121574.1;KT121578.1;KT121581.1;KT121579.1;KT121580.1;KT121577.1;KT121575.1;KT121573.1;KT121572.1;KT121576.1;MN481967.1;KJ813439.1;MN481969.1;MN481968.1;KM027262.1;KJ156916.1;KJ156942.1;KT861627.1;KJ156910.1;KJ156874.1;MH013216.1;KY689142.1;MG693171.1;MG693172.1;MG693168.1;MG693169.1;NC;KU762338.1;KU762337.1;MK492263.1;MK211379.1;EF065514.1;HM211101.1;HM211099.1;MG762674.1;HM211098.1;HM211100.1;EF065515.1;EF065516.1;MG693170.1;NC;EF065513.1;NC;HQ166910.1;FV537213.1;FV537212.1;FV537211.1;FV537210.1;HI553383.1;HZ038027.1;DI195813.1;FW503166.1;MK211374.1;KP886809.1;KP886808.1;DQ071615.1;KJ473815.1;KY417148.1;KY417147.1;KY417142.1;MK211377.1;MK211375.1;DL008547.1;DJ059785.1;

AY283796.1;AY559094.1;AY559081.1;AY559097.1;AY559083.1;AY559086.1;AY559087.1;AY559093.1;AY559084.1;AY559082.1;AY559095.1;AY559085.1;AY559096.1;AY394979.1;AY394980.1;AY394978.1;JX163924.1;DL008527.1;DJ059765.1;AY502925.1;AY291451.1;AY502926.1;AY502927.1;AY323977.2;DQ898174.1;JX163923.1;JQ316196.1;JN854286.1;AY394850.2;GU553365.1;GU553364.1;GU553363.1;AY321118.1;CS079028.1;AY278491.2;AY283795.1;AY283797.1;AY283794.1;AY559088.1;AY559092.1;AY559089.1;AH013708.2;AY559090.1;AY559091.1;AY283798.2;AY310120.1;AB257344.1;AY461660.1;AY291315.1;HW375992.1;HW269828.1;DL476508.1;CS569493.1;CS254197.1;CQ918584.1;JX163927.1;AY351680.1;NC;DJ045279.1;CS079026.1;CQ918598.1;EA012708.1;CQ918585.1;JX163926.1;AY463060.1;AY463059.1;AY279354.2;AY508724.1;AY772062.1;AY278490.3;AY278488.2;AY595412.1;AY278487.3;AY654624.1;AY278554.2;CS079029.1;EA012709.1;AY864805.1;AY864806.1;AY394990.1;AY395004.1;AY394989.1;AY394992.1;AY394993.1;AY304495.1;DQ640652.1;AY394977.1;AY394988.1;AY394984.1;AY394986.1;AY394995.1;AY394985.1;AY394994.1;AY394981.1;AY278489.2;AY390556.1;AY395003.1;AY394997.1;AY394996.1;AY304486.1;AY304488.1;AY545915.1;AY515512.1;FJ959407.1;AY545916.1;AY545917.1;AY613950.1;AY572038.1;AY545918.1;AY613947.1;AY568539.1;AY613948.1;AY613949.1;AY545919.1;AY686864.1;AY572034.1;AY686863.1;AY545914.1;AY572035.1;AY394983.1;AY394982.1;AY394991.1;AY394987.1;AY278741.1;DJ066921.1;CS079027.1;EA012707.1;DQ497008.1;MK062180.1;MK062182.1;MK062181.1;MK062184.1;MK062183.1;MK062179.1;FJ882930.1;KF514420.1;KF514417.1;KF514416.1;KF514414.1;KF514412.1;KF514411.1;KF514410.1;KF514406.1;KF514405.1;KF514403.1;KF514402.1;KF514401.1;KF514395.1;KF514393.1;KF514391.1;KF514390.1;KF514389.1;JF292922.1;KF514407.1;JX162087.1;FJ882955.1;FJ882929.1;FJ882931.1;FJ882944.1;FJ882954.1;FJ882950.1;FJ882940.1;FJ882956.1;FJ882960.1;FJ882941.1;FJ882926.1;FJ882928.1;FJ882945.1;FJ882948.1;FJ882961.1;FJ882958.1;FJ882952.1;FJ882957.1;JF292914.1;JF292913.1;JF292910.1;JF292909.1;JF292920.1;JF292919.1;JF292918.1;JF292917.1;JF292916.1;JF292912.1;JF292911.1;JF292908.1;JF292907.1;HQ890546.1;HQ890545.1;HQ890544.1;HQ890543.1;HQ890542.1;HQ890541.1;JF292915.1;HQ890535.1;JF292906.1;FJ882953.1;FJ882943.1;JF292902.1;HQ890537.1;HQ890533.1;HQ890530.1;HQ890528.1;HQ890527.1;HQ890526.1;HQ890536.1;HQ890534.1;HQ890529.1;JF292905.1;JF292903.1;JF292904.1;HQ890531.1;HQ890540.1;HQ890539.1;HQ890538.1;HQ890532.1;FJ882959.1;FJ882942.1;FJ882951.1;FJ882962.1;FJ882927.1;FJ882937.1;FJ882933.1;FJ882946.1;FJ882935.1;FJ882949.1;FJ882947.1;JF292921.1;FJ882936.1;FJ882932.1;FJ882939.1;FJ882934.1;FJ882938.1;KF514423.1;KF514422.1;KF514421.1;KF514419.1;KF514418.1;KF514415.1;KF514413.1;KF514409.1;KF514408.1;KF514404.1;KF514400.1;KF514399.1;KF514398.1;KF514397.1;KF514396.1;KF514394.1;KF514392.1;KF514388.1;CQ903009.1;GX394655.1;GP426726.1;EA133160.1;FJ882963.1;AY714217.1;JX163928.1;JX163925.1;AY427439.1;DQ182595.1;AY286320.4;AY297028.1;AY485277.1;AY357076.1;AY350750.1;AY282752.2;AY502928.1;AY394998.1;AY502924.1;AP006559.1;AY502923.1;AP006561.1;AY502932.1;AP006560.1;AP006558.1;AY348314.1;AY338175.1;AY338174.1;AY502929.1;AY313906.1;AY502931.1;AP006557.1;AY362698.1;AY502930.1;AY362699.1;AY345987.1;AY345986.1;AY345988.1;AY485278.1;AY357075.1;EU371564.1;EU371563.1;EU371562.1;EU371561.1;EU371560.1;EU371559.1;AY394999.1;AY395001.1;AY395000.1;AY395002.1;KY417150.1;KY417146.1;KC881006.1;KF367457.1;KY417144.1;KC881005.1;MK211376.1;KY417152.1;KY417151.1;KY417145.1;KJ473816.1;KY770859.1;KY770858.1;FJ588686.1;MK211378.1;KY417149.1;KY417143.1;KU973692.1;JX993988.1;KF569996.1;GQ153543.1;GQ153542.1;GQ153547.1;FJ211859.1;DQ022305.2;DQ084200.1;DQ084199.1;GQ153548.1;GQ153546.1;GQ153545.1;GQ153544.1;GQ153540.1;GQ153541.1;GQ153539.1;KJ473814.1;DQ412043.1;DQ648857.1;JX993987.1;KY938558.1;KJ473811.1;DQ412042.1;DQ648856.1;KY770860.1;KJ473813.1;KJ473812.1;KY352407.1;NC;MG772934.1;MG772933.1;MT040333.1;MT072865.1;MT040335.1;MT040334.1;MT040336.1;MT072864.1;MT121216.1;MT084071.1;MN996532.1;MT461669.1;MT461670.1;NC;KX883638.1;MF685025.1;KX947267.1;FJ848673.1;FJ848674.1;FJ848675.1;EU487200.1;MG600027.1;KY130432.1;NC;KJ681496.1;MG600031.1;MG600030.1;NC;KY370053.1;MG996765.1;NC;AY427798.1;MK521914.1;LC088095.1;LC088094.1;LT900503.1;KM403390.1;NC;JQ860350.1;MH603532.1;MG600028.1;KY967734.1;KY967735.1;

KY967733.1;KY967726.1;KY967725.1;NC;KY967717.1;KY967715.1;KY967724.1;KY967723.1;KP981644.1;JQ404409.1;KC175341.1;KC175340.1;MT114540.1;MT114542.1;MT114538.1;MT114541.1;MT114543.1;MT114544.1;MT114539.1;GQ477367.1;EU856362.1;EU856361.1;KP849472.1;KX499468.1;DQ811787.1;KR270796.1;KX900398.1;KX900403.1;KX900395.1;KY406735.1;KX900404.1;KX900405.1;KX900411.1;KX900406.1;KX900407.1;KX900401.1;KX900400.1;KX900399.1;KX900397.1;KX900396.1;KX900408.1;KX900410.1;KX900409.1;KR061459.1;NC;LT545990.1;DQ201447.1;DQ811785.1;DQ811786.2;FJ755618.2;EU074218.2;KX058075.1;KT696544.1;KP202848.1;HQ462571.1;CQ870486.1;AX154950.1;GC668780.1;NC;AJ271965.2;KX083668.1;KC962433.1;KU729220.1;HM776941.1;DQ811788.1;KX900393.1;KX900394.1;KX900402.1;DQ443743.1;DQ811789.2;JN856008.2;JQ404410.1;KY063616.1;KY063617.1;KY063618.2;GQ152141.1;KF530116.1;HQ392471.1;MG893511.1;EU186072.1;HQ012370.1;KX722529.1;KX722530.1;KX722531.1;KF530124.1;FJ938058.1;KF530271.1;KF530270.1;HQ392470.1;HQ012367.1;HQ012372.1;HQ012369.1;GU553362.1;GU553361.1;HQ012371.1;HQ392469.1;HQ392472.1;KF530122.1;KF530119.1;JN183882.1;KF530135.1;KF530123.1;KF530126.1;KF530120.1;KF530131.1;KF530130.1;KY566209.1;KY566211.1;KY566210.1;KF530127.1;KY292377.1;MN165107.1;KF530118.1;KF530115.1;KF530132.1;JN183883.1;KF530136.1;KF530134.1;DQ848678.1;KP143509.1;KP143508.1;KP143512.1;KP143507.1;KP143510.1;KP143511.1;KF530117.1;KF530129.1;KF530125.1;FJ938062.1;FJ938055.1;FJ938059.1;FJ938052.1;HQ012368.1;FJ938057.1;FJ938056.1;FJ938053.1;FJ938054.1;FJ938051.1;FJ938061.1;FJ938060.1;KU215427.1;KU215428.1;KU215419.1;KU215420.1;KU215424.1;KU215425.1;KU215423.1;KU215426.1;KU215422.1;KU215421.1;KF530133.1;KF530121.1;MH817484.1;DQ286389.1;KC175339.1;NC;AY994055.1;KC461236.1;KC461237.1;DQ010921.1;KC461235.1;JQ408981.1;JQ408980.1;JN634064.1;NC;HM245925.1;HM245926.1;MF113046.1;NC;KM347965.1;KX512809.1;LC119077.1;LC215871.1;KX512810.1;NC;KX964649.1;KY370045.1;KY370054.1;MK163627.1;NC;KF294380.2;KY370050.1;KT253271.1;KT253272.1;KY073747.1;KY073748.1;MN611517.1;KT253270.1;KT253269.1;KU291449.1;JQ410000.1;KT368916.1;KT253327.1;NC;KT368907.1;KT368908.1;KT368899.1;KT368901.1;KT368898.1;KT368903.1;KT368906.1;MF593473.1;KT368895.1;KT368896.1;KT368897.1;KT368915.1;KT368894.1;KT368892.1;KT368893.1;KT368900.1;KT368914.1;KT368913.1;KT368902.1;KT368909.1;KT368910.1;KT368911.1;KT368912.1;KT368904.1;KT368905.1;KT253328.1;KT253324.1;KT253326.1;KT253325.1;KF514432.1;KF514431.1;JX503061.1;KY674919.1;JX503060.1;KY996417.1;MT438696.1;KY369911.1;KY369910.1;KY983587.1;KY967357.1;KY369908.1;MT438699.1;MT438698.1;MN369046.1;MN306046.1;KY369912.1;KY369914.1;MF542265.1;KY684760.1;KY369913.1;KY369909.2;KY621348.1;KY674914.1;KU291448.1;KF514433.1;KF514430.1;KF514429.1;NC;AF304460.1;X69721.1;KF293666.1;KF293665.1;KF293664.1;KY073746.1;NC;KY073745.1;KY073744.1;NC;JQ765564.1;JQ900256.1;JQ900258.1;JQ765569.1;JQ765565.1;JQ765563.1;KF530112.1;MK334046.1;MK334047.1;MN026166.1;MG772808.1;KY983586.1;DQ445911.1;JQ765571.1;JQ765572.1;JX504050.1;FJ211861.1;DJ009246.1;CS124012.1;CS078029.1;CS037919.1;MI512876.1;HK133379.1;GX610733.1;NC;AY567487.2;JQ900260.1;JQ765568.1;JQ900259.1;JQ765575.1;JQ765573.1;KU521535.1;JQ765567.1;KT381875.1;KX179500.1;KY674915.1;KY554967.1;KY674916.1;KY554968.1;KY554970.1;JQ900255.1;JQ765566.1;MK334044.1;MK334043.1;MN306018.1;MK334045.1;MN306040.1;KT266906.1;MG428702.1;MG428707.1;MG428706.1;MG428701.1;MG428699.1;MG428700.1;MG428705.1;MG428703.1;JX104161.1;MG428704.1;JQ900257.1;JX524171.1;KF530105.1;JQ765574.1;KY554971.1;KY829118.1;KY554969.1;KF530110.1;KF530106.1;AY518894.1;KF530113.1;KF530111.1;KF530114.1;KF530108.1;KF530104.1;KF530109.1;KF530107.1;JQ765570.1;DQ445912.1;NC;KJ473806.1;KY770851.1;KY770850.1;MK472070.1;MN611525.1;MN611523.1;NC;JQ989270.1;JQ989271.1;JQ989273.1;JQ989272.1;JQ989269.1;JQ989267.1;JQ989266.1;JQ989268.1;NC;KJ473807.1;KJ473810.1;MG916904.1;MK720946.1;MK720945.1;MG916903.1;MG916902.1;MG916901.1;MK211373.1;EU420137.1;KJ473795.1;NC;EU420138.1;KJ473796.1;MN611524.1;KJ473798.1;KJ473800.1;KJ473799.1;NC;EU420139.1;KJ473797.1;MN611518.1;MK720944.1;MK472071.1;MK472069.1;MK472068.1;MH938449.1;NC;MH938450.1;NC;KJ473809.1;MH938448.1;MH687952.1;MH687951.1;MH687940.1;MH687949.1;MH687935.1;MH687962.1;MH687950.1;MH687939.1;MH687959.1;MH687936.1;MH687943.1;MH68795

5.1;MH687965.1;MH687960.1;MH687958.1;MH687961.1;MH687937.1;MH687957.1;MH687966.1;MH687942.1;MH687944.1;MH687956.1;MN611521.1;MK211372.1;NC;DQ648858.1;MK211371.1;MK211370.1;MK211369.1;MH687941.1;MH687938.1;MH687934.1;MH687948.1;MH687954.1;MH687946.1;MH687967.1;MH687964.1;MH687963.1;MH687945.1;MN065811.1;MG923574.2;KJ158152.1;KC189944.1;MN315264.1;KP728470.1;JX560761.1;MG781192.1;KX534206.1;KX534205.1;JQ023162.1;LQ410518.1;MM872280.1;KP162057.1;KP403802.1;MH726408.1;KY420075.1;KT323979.1;KC109141.1;KC210146.1;MN486588.1;MK796238.1;KU836638.1;EF185992.1;NC;AF353511.1;LT905451.1;KR610992.1;KR610991.1;KU664503.1;LC053455.1;GU937797.1;LQ410517.1;MM872279.1;KM887144.1;KX839250.1;KX839248.1;KX839247.1;KY486713.1;KX839251.1;KY486714.1;KX839249.1;KX839246.1;LT897799.1;LT906581.1;LT906582.1;LT906620.1;LT905450.1;KX791060.1;KF761675.1;KT021227.1;KT021228.1;KT021229.1;KT021230.1;KT021231.1;KT021233.1;KT021232.1;JX489155.1;JX188454.1;MH726392.1;KP765609.1;MK644604.1;KR610993.1;KJ960178.1;KJ960180.1;KR610994.1;KJ960179.1;MH726393.1;KR818832.1;JX524137.1;MH726386.1;MH726391.1;MH726385.1;JX112709.1;MK392335.1;MH726387.1;JX647847.1;MH748550.1;MK584552.1;KM089829.1;MH726390.1;KU646831.1;MH726388.1;MH726389.1;KF384500.1;MH708895.1;KM609204.1;JX261936.1;MH726384.1;MH726398.1;MH726397.1;MH726396.1;MH726401.1;MH726395.1;MH726394.1;MH726399.1;MH726400.1;MK288006.1;MH726373.1;KU380331.1;KC210145.1;MA741912.1;LY411680.1;LQ410519.1;LQ068536.1;MM872281.1;KJ645683.1;KM975737.1;MA347662.1;LP731461.1;MA347651.1;LP731413.1;KJ645641.1;KP641663.1;KP641662.1;MG837058.1;KU982981.1;MH052687.1;MH052683.1;KU982979.1;KU982978.1;KR265817.1;KR265840.1;KY499262.1;KX683006.1;MH891588.1;KR078299.1;KJ584361.1;KM392225.1;KU893861.1;KM392224.1;KR265842.1;KR265841.1;KU893869.1;KU893870.1;KU893871.1;KU893872.1;KX580958.1;KU893873.1;KJ645665.1;KJ645670.1;KJ645657.1;KJ645653.1;LC063830.1;LC063832.1;LC063831.1;LC063829.1;KR265809.1;KR265784.1;KR265803.1;KR265765.1;MK559456.1;MK559455.1;MK559454.1;KR265801.1;KJ645694.1;MK558089.1;KJ645636.1;JX524171.1;JQ900257.1;JX104161.1;MG428704.1;MG428700.1;MG428703.1;MG428699.1;MG428707.1;MG428701.1;MG428706.1;MG428705.1;MG428702.1;KT266906.1;MN306040.1;KU521535.1;KT381875.1;KX179500.1;JQ765567.1;KY674915.1;KY554967.1;KY674916.1;KY554970.1;KY554968.1;JQ900255.1;JQ765566.1;KF530105.1;JQ765574.1;KY554971.1;KY829118.1;KY554969.1;JQ765572.1;JQ765571.1;JX504050.1;FJ211861.1;NC;AY567487.2;DJ009246.1;CS124012.1;CS078029.1;CS037919.1;JQ765568.1;JQ900259.1;JQ765575.1;JQ765573.1;JQ900260.1;KF530110.1;KF530106.1;KF530113.1;KF530109.1;KF530107.1;KF530114.1;KF530108.1;KF530111.1;KF530104.1;KY983586.1;MN026166.1;MG772808.1;JQ900256.1;JQ765569.1;JQ765565.1;JQ765563.1;JQ900258.1;KF530112.1;JQ765570.1;DQ445912.1;JQ765564.1;NC;KY073744.1;NC;KY073745.1;KY073746.1;MN026165.1;MN026164.1;KY073748.1;KY073747.1;MK334047.1;MK334046.1;DQ445911.1;MK334044.1;MK334043.1;MN306018.1;MK334045.1;KF923894.1;KF923911.1;KF923891.1;KF923921.1;KF923908.1;KF923916.1;KF923909.1;KF923919.1;KF923910.1;KF923923.1;KF923922.1;KF923925.1;KJ958219.1;KJ958218.1;KF923893.1;KF923918.1;KF923924.1;KF923895.1;KF923907.1;KF923890.1;KY554974.1;KY554975.1;KY674920.1;KX344031.1;MK303621.1;MK303623.1;MK303624.1;MK303619.1;KX538964.1;KF923904.1;KX538966.1;KX538976.1;KX538972.1;KY967356.1;KX538978.1;KF923902.1;MG197713.1;MG197710.1;MG197715.1;MG197712.1;MG197717.1;MG197716.1;MG197722.1;MK303622.1;KX538979.1;MK303620.1;MF374983.2;MN306041.1;MN306036.1;MN306042.1;MN306053.1;MN310478.1;MH121121.1;KY369907.1;MF374985.2;MF374984.1;KY369906.1;MG197723.1;KY967358.1;KY983583.1;KY684759.1;KY967361.1;KY983585.1;KY967359.1;KY983588.1;KY369905.1;KX538970.1;MN026164.1;MG977451.1;MG977446.1;MG977450.1;MG977448.1;MG977444.1;MG977452.1;MG977445.1;MG977447.1;MG977449.1;KF923903.1;KF923897.1;KX538975.1;KX538967.1;KX538974.1;KX538971.1;KX538973.1;KX538968.1;KX538977.1;KX538969.1;KX538965.1;AY903459.1;KF923889.1;KF923887.1;KF923888.1;KF923898.1;MK303625.1;MG197709.1;MG197711.1;MG197720.1;MG197721.1;MG197718.1;MN306043.1;MN310476.1;MG197719.1;MG197714.1;KF923886.1;KF530070.1;KF530081.1;KF530068.1;KF530079.1;KF530094.1;KF530089.1;KF530082.1;KF530088.1;KF530071.1;KF530091.1;KF530076.1;KF530067.1;KF530096.1;KF530095.1;KF530085.1;KF530066.1;KF530061.1;KF

530073.1;KF530065.1;KF530090.1;KF530097.1;KF530074.1;KF530075.1;KF530059.1;KF530062.1;KF530087.1;KF530093.1;KF530060.1;KF530086.1;KF530077.1;KF530083.1;KF530092.1;KY014281.1;KF530080.1;KF530072.1;KF530078.1;KF530064.1;KY014282.1;KU131570.1;MF314143.1;MN026165.1;KY967360.1;MK327281.1;KP198610.1;KP198611.1;KF923906.1;KF923896.1;AY391777.1;AY585229.1;NC;AY585228.1;KF530098.1;KF530084.1;KF530069.1;KF530099.1;KF530063.1;JN129834.1;KF923905.1;KF923899.1;KF923900.1;JN129835.1;AY903460.1;KY554973.1;KY674918.1;KY674917.1;KY554972.1;KF923920.1;KF923915.1;KF923913.1;KF923912.1;KF923892.1;KF923917.1;KF923901.1;KF923914.1;FJ882947.1;FJ882939.1;FJ882932.1;FJ882934.1;FJ882927.1;FJ882938.1;AY278741.1;CS460762.1;AY338174.1;AY348314.1;AY338175.1;AY279354.2;AY278489.2;FJ588686.1;NC;MT121216.1;MT108784.1;MT461669.1;MT461671.1;MT461670.1;FJ211859.1;DQ412042.1;DQ412043.1;DQ071615.1;AY572035.1;AY572034.1;AY686863.1;AY686864.1;AY572038.1;AY304488.1;AY304486.1;AY864806.1;AY278487.3;AY278490.3;AY278488.2;AY772062.1;DQ898174.1;DQ182595.1;AY394850.2;FJ882926.1;FJ882929.1;FJ882931.1;FJ882944.1;FJ882954.1;FJ882950.1;FJ882956.1;FJ882940.1;FJ882955.1;FJ882960.1;FJ882941.1;FJ882930.1;FJ882928.1;FJ882933.1;FJ882937.1;FJ882946.1;FJ882935.1;FJ882936.1;FJ882949.1;
