# Supplementary material
Source: PubMed Central journal article supplement (PMC8323504)
Supplement: mmc2.pdf [file mmc2.pdf]

# Supplemental Material For Publication

## Origin, phylogeny, variability and epitope conservation of SARS-CoV-2 worldwide

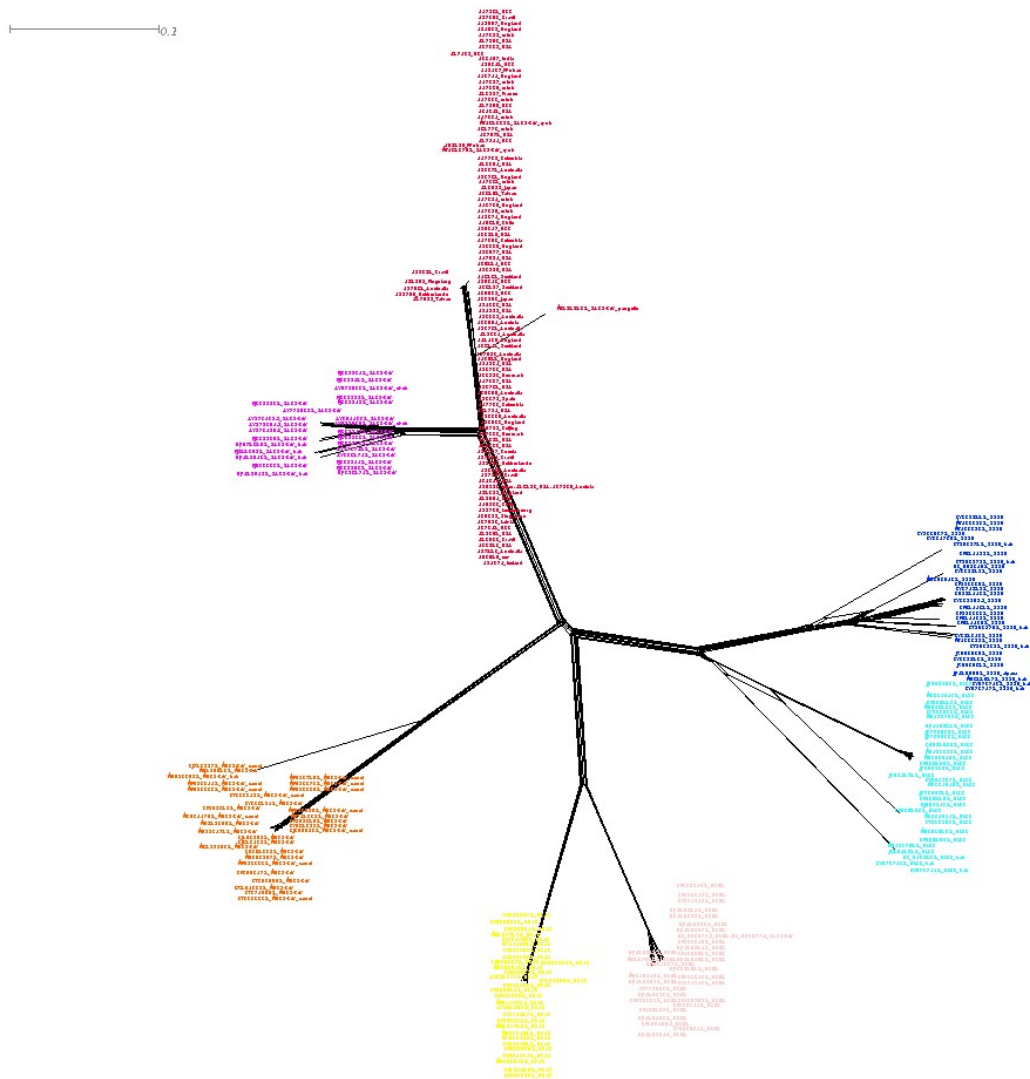

**Figure S1.** SplitsTree network of coronavirus infecting humans using SplitsTree 4.1. Taxa in Red – SARS-CoV-2; Blue – 229E; Cyan – NL63; Green-brown – HKU1; Yellow – OC43; Orange – MERS; Magenta – SARS-CoV.

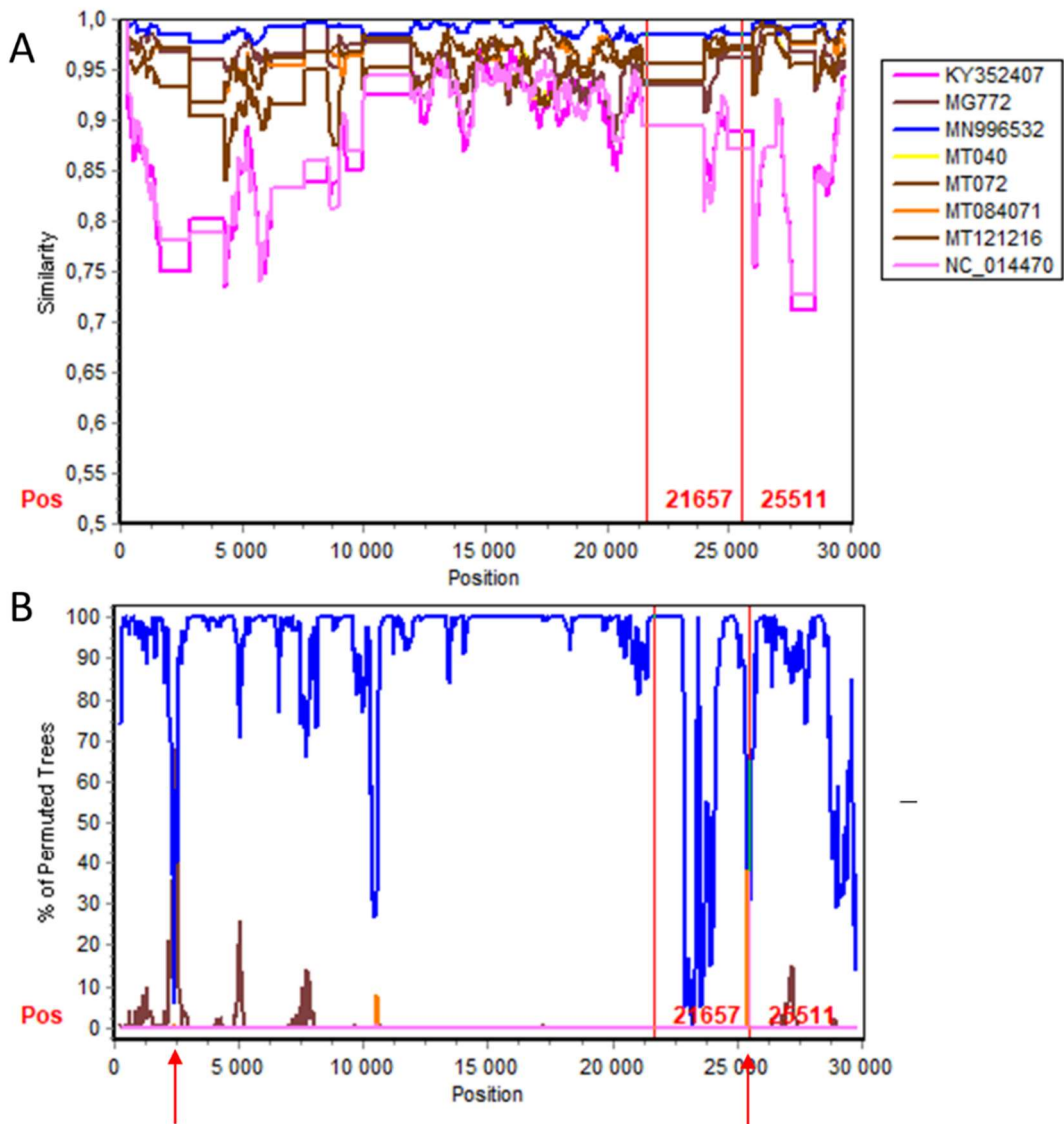

**Figure S2.** A) Similarity plot along the reference genome of SARS-CoV-2 versus the sequences of the non-human-SARS-CoV-2 emerging cluster, using SimPlot version 3.5.1. Each curve is a comparison between the genome being analyzed and the reference genome. B) Bootscan plot querying the SARS-CoV-2 reference genome with the genomes of the non-human-SARS-CoV-2 emerging cluster. The bootscan graph indicates two recombinant regions (red arrows) with breakpoint positions at approximate sequence positions around ~2350 to ~2400 (region of orf 1ab) and ~25400 to ~25500 (region of spike gene) between the bat coronavirus genome RaTG13 and another group of bat genomes named bat-SL-CoVZXC21 and bat-SL-CoVZC45; and between bat coronavirus genome RaTG13 and the pangolin coronavirus genome MP789, respectively. The parameters of SimPlot similarity plot and bootscan analysis were set as default except for a window size of 500 and step size of 50. The breakpoint positions refer to the coordinates of the spike gene.

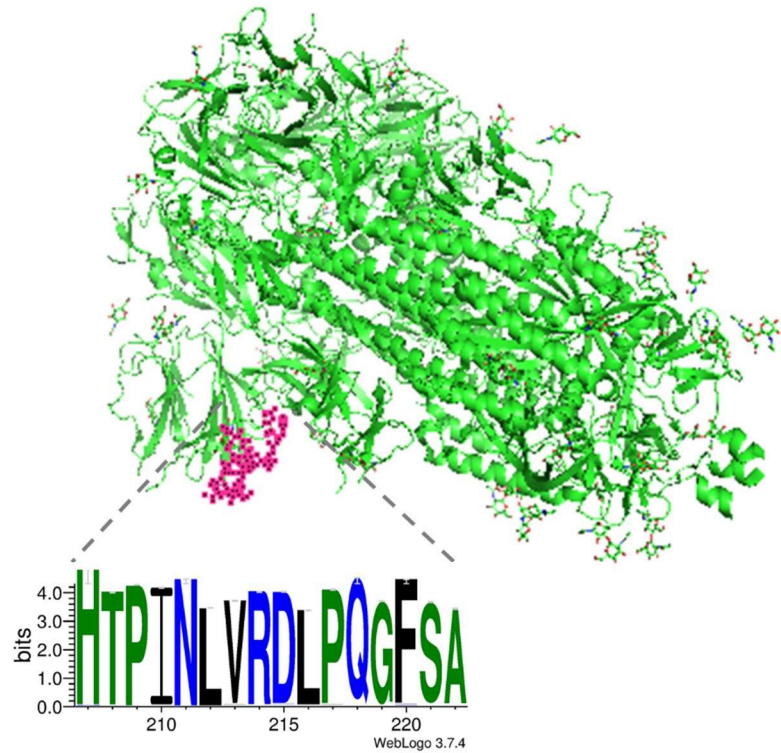

**Figure S3.** SARS-CoV-2 S glycoprotein structure (pdb: 6vxx). Figure caption using PyMol version 2.0. Dashed line highlight conservation of a putative epitope region (amino acids residues positions ranging from 207 to 222) and correspondent sequence logo from 19471 SARS-CoV-2 genome alignment, evidencing that the putative epitope is an exposed region of the protein.

**Table S1.** Variant density across SARS-CoV-2 Open reading frames (ORFs).

| SARS-CoV-2 open Reading frames                                         | Variant density |
|------------------------------------------------------------------------|-----------------|
| orf1ab                                                                 | 0,30            |
| mature peptide -leader protein (both pp1a and pp1ab)                   | <b>0,40</b>     |
| mature peptide -nsp2 (both pp1a and pp1ab)                             | <b>0,37</b>     |
| mature peptide - nsp3 (both pp1a and pp1ab)                            | 0,31            |
| mature peptide - ns4 (both pp1a and pp1ab)                             | 0,30            |
| mature peptide - 3C-like proteinase (both pp1a and pp1ab)              | 0,26            |
| mature peptide - nsp6 (both pp1a and pp1ab)                            | 0,29            |
| mature peptide - nsp7 (both pp1a and pp1ab)                            | 0,33            |
| mature peptide - nsp8 (both pp1a and pp1ab)                            | 0,29            |
| mature peptide - nsp9 (both pp1a and pp1ab)                            | 0,28            |
| mature peptide - nsp10 (both pp1a and pp1ab)                           | 0,25            |
| mature peptide - RNA-dependent RNA polymerase (produced by pp1ab only) | 0,27            |
| mature peptide - helicase (produced by pp1ab only)                     | 0,25            |
| mature peptide - 3'-to-5' exonuclease (produced by pp1ab only)         | 0,29            |
| mature peptide - endoRNase (produced by pp1ab only)                    | 0,29            |
| mature peptide -2'-O-ribose methyltransferase (produced by pp1ab only) | 0,26            |
| -----                                                                  | -----           |
| orf1a                                                                  | 0,31            |
| mature peptide - nsp11 (produced by pp1a only)                         | 0,26            |
| -----                                                                  | -----           |
| spike glycoprotein                                                     | <b>0,31</b>     |
| SARS-CoV-like_Spike_S1_NTD                                             | <b>0,39</b>     |
| Spike_NTD                                                              | <b>0,37</b>     |
| SARS-CoV-2_Spike_S1_RBD                                                | 0,26            |
| SARS-CoV-like_Spike_SD1-2_S1-S2_S2                                     | 0,29            |
| Corona_S2                                                              | 0,28            |
| CoV_S2_C                                                               | 0,26            |
| -----                                                                  | -----           |
| Orf3a                                                                  | <b>0,47</b>     |
| -----                                                                  | -----           |
| gene E                                                                 | 0,29            |
| -----                                                                  | -----           |
| gene M                                                                 | 0,29            |
| -----                                                                  | -----           |
| ORF6                                                                   | <b>0,41</b>     |
| -----                                                                  | -----           |
| ORF7a                                                                  | <b>0,49</b>     |
| -----                                                                  | -----           |
| ORF7b                                                                  | <b>0,40</b>     |
| -----                                                                  | -----           |
| ORF8                                                                   | <b>0,45</b>     |
| -----                                                                  | -----           |
| gene N                                                                 | <b>0,42</b>     |
| -----                                                                  | -----           |
| ORF10                                                                  | <b>0,38</b>     |

Note: orf1ab and orf1a are translated into either polyprotein ab or pp1a. Some mature peptides are produced by both orf1ab and orf1a, while others are produced only by one of the polyproteins as depicted in the table. The variant density of the conserved domains of spike glycoprotein is also presented.

**Table S2. Predicted epitopes from spike (S) glycoprotein of SARS-CoV-2.**

| Sequence <sup>a</sup>                | Size | % of exposed residues | Average epitope probability | Exposed epitope 3D structure <sup>b</sup> | Start residue | End residue | Epitope conservancy in all SARS-CoV-2 (%) | Sequence logo of 19471 S glycoprotein aligned sequences                               | Sequence log of 31323 unique S glycoprotein aligned sequences from a set of 199984 sequences |
|--------------------------------------|------|-----------------------|-----------------------------|-------------------------------------------|---------------|-------------|-------------------------------------------|---------------------------------------------------------------------------------------|----------------------------------------------------------------------------------------------|
| QCVNLTTRTQLPPAYTNSFTRGV<br>γδγ γ     | 23   | 0.522                 | 0.581                       |                                           | 14            | 36          | 89.8                                      | 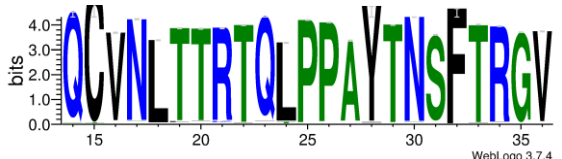   |           |
| FSNVTFHAIHVSNGTKRFDN<br>αα β         | 23   | 0.478                 | 0.559                       |                                           | 59            | 81          | 96.7                                      |    |           |
| LGVYYHKNNKSWMESEFRVYSSA<br>δ α ε δδδ | 23   | 0.565                 | 0.570                       |                                           | 141           | 163         | 96.9                                      |    |           |
| DLEGKQGNFKNLRE<br>γ                  | 14   | 0.571                 | 0.546                       |                                           | 178           | 191         | 98.0                                      |   |          |
| HTPINLVRDLPQGFSA<br>β                | 16   | 0.750                 | 0.574                       | Yes                                       | 207           | 222         | 85.7                                      |  |         |

|                                 |    |       |       |     |     |     |      |  |  |
|---------------------------------|----|-------|-------|-----|-----|-----|------|--|--|
| YLTPGDSSSGWTA                   | 13 | 0.692 | 0.595 |     | 248 | 260 | 87.9 |  |  |
| YQTSNFRVQP                      | 10 | 0.500 | 0.536 | Yes | 313 | 322 | 88.5 |  |  |
| NITNLC                          | 6  | 0.667 | 0.517 | Yes | 331 | 336 | 99.4 |  |  |
| FGEVFNATRFASVYANRK              | 19 | 0.632 | 0.552 | Yes | 338 | 356 | 98.7 |  |  |
| NSASFSTFKCYGVSPTKLNLCFTNV       | 26 | 0.500 | 0.563 | Yes | 370 | 395 | 98.3 |  |  |
| GDEVROIAPGQTGKIADYNYK<br>β<br>Y | 21 | 0.286 | 0.518 | Yes | 404 | 424 | 98.5 |  |  |

|                                      |    |       |       |     |     |     |      |                                                                                       |                                                                                       |
|--------------------------------------|----|-------|-------|-----|-----|-----|------|---------------------------------------------------------------------------------------|---------------------------------------------------------------------------------------|
| NNLDSKVGGNYY                         | 13 | 0.615 | 0.567 |     | 439 | 451 | 94.1 | 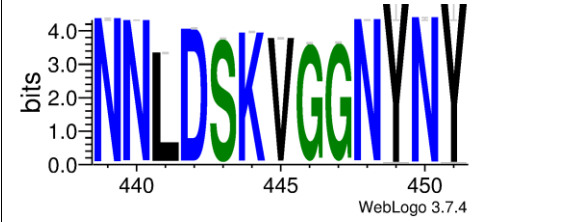   |    |
| LFRKSNLKPFERDISTEIQAGST <sub>5</sub> | 24 | 0.458 | 0.561 |     | 455 | 478 | 89.8 |    |    |
| VEGFNCYFPLQ<br>α<br>β<br>γ           | 11 | 0.636 | 0.533 |     | 483 | 493 | 96.1 |    |    |
| FQPTNG<br>α<br>β<br>γ                | 6  | 0.667 | 0.506 |     | 497 | 502 | 96.1 |   |   |
| ELLHAPATVCGPKKSTNLVK                 | 20 | 0.700 | 0.564 | Yes | 516 | 535 | 95.1 |  |  |
| VNCTEVP                              | 7  | 0.429 | 0.522 |     | 615 | 621 | 99.8 |  |  |

|                                  |    |       |       |     |     |     |      |                                                                                       |                                                                                       |
|----------------------------------|----|-------|-------|-----|-----|-----|------|---------------------------------------------------------------------------------------|---------------------------------------------------------------------------------------|
| ADQLTPTWRVYSTGSNVFQT             | 20 | 0.450 | 0.576 |     | 626 | 645 | 99.1 | 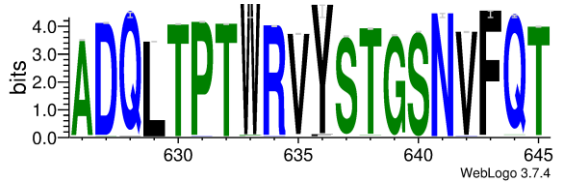   |    |
| VNNSYECDIP                       | 10 | 0.700 | 0.540 | Yes | 656 | 665 | 99.2 |    |    |
| SYQTQTNSPRRRARSVASQS<br>$\alpha$ | 19 | 0.789 | 0.618 |     | 673 | 691 | 97.9 |    |    |
| AYTMSLGAENSVAYSN<br>$\beta$      | 16 | 0.813 | 0.608 | Yes | 694 | 709 | 98.8 |    |    |
| KQIYKTPPIKDFGGF                  | 15 | 0.600 | 0.560 | Yes | 786 | 800 | 99.1 |  |  |



|                        |    |       |       |     |      |      |      |                                                                                       |                                                                                       |
|------------------------|----|-------|-------|-----|------|------|------|---------------------------------------------------------------------------------------|---------------------------------------------------------------------------------------|
| LPDPSKPSKR             | 10 | 0.700 | 0.563 | Yes | 806  | 815  | 99.1 | <p>bits<br/>4.0<br/>3.0<br/>2.0<br/>1.0<br/>0.0<br/>810 815<br/>WebLogo 3.7.4</p>     | <p>bits<br/>4.0<br/>3.0<br/>2.0<br/>1.0<br/>0.0<br/>810 815<br/>WebLogo 3.7.4</p>     |
| LADAGFIKQYGDCLGD       | 16 | 0.563 | 0.529 |     | 828  | 843  | 98.8 | <p>bits<br/>4.0<br/>3.0<br/>2.0<br/>1.0<br/>0.0<br/>830 835 840<br/>WebLogo 3.7.4</p> | <p>bits<br/>4.0<br/>3.0<br/>2.0<br/>1.0<br/>0.0<br/>830 835 840<br/>WebLogo 3.7.4</p> |
| VEAEVQI                | 7  | 0.429 | 0.525 | Yes | 987  | 993  | 99.6 | <p>bits<br/>4.0<br/>3.0<br/>2.0<br/>1.0<br/>0.0<br/>990<br/>WebLogo 3.7.4</p>         | <p>bits<br/>4.0<br/>3.0<br/>2.0<br/>1.0<br/>0.0<br/>990<br/>WebLogo 3.7.4</p>         |
| GQSKRVDFC              | 9  | 0.222 | 0.530 | Yes | 1035 | 1043 | 99.6 | <p>bits<br/>4.0<br/>3.0<br/>2.0<br/>1.0<br/>0.0<br/>1035 1040<br/>WebLogo 3.7.4</p>   | <p>bits<br/>4.0<br/>3.0<br/>2.0<br/>1.0<br/>0.0<br/>1035 1040<br/>WebLogo 3.7.4</p>   |
| FYEPQIITD <sub>α</sub> | 10 | 0.600 | 0.541 | Yes | 1109 | 1118 | 99.5 | <p>bits<br/>4.0<br/>3.0<br/>2.0<br/>1.0<br/>0.0<br/>1110 1115<br/>WebLogo 3.7.4</p>   | <p>bits<br/>4.0<br/>3.0<br/>2.0<br/>1.0<br/>0.0<br/>1110 1115<br/>WebLogo 3.7.4</p>   |

|                                                 |    |       |       |  |      |      |      |  |  |
|-------------------------------------------------|----|-------|-------|--|------|------|------|--|--|
| ELGKYE                                          | 6  | 0.500 | 0.516 |  | 1202 | 1207 | 99,5 |  |  |
| SCCKFDEDDSEPV <sup>α</sup> LKG <sup>β</sup> VKL | 19 | 0.632 | 0.537 |  | 1252 | 1270 | 98,6 |  |  |

<sup>a</sup> - Amino acids that are mutated in Variants of Concern (VOC) defined by WHO are in bold. The amino acid substitutions that characterize each VOC, denominated alpha ( $\alpha$ ), beta ( $\beta$ ), gamma ( $\gamma$ ), delta ( $\delta$ ) and epsilon ( $\epsilon$ ), which are present in the predicted epitopes received the Greek alphabetic letter below the amino acid that is changed in the respective VOC.

<sup>b</sup> - Exposed epitope according to 3D structure visualized with PyMOL, PDB: 6vxx (Schrodinger LLC 2015). Red circle – evidence of two enriched amino acids (A and V; S and N).

**Table S3. Conservation of the predicted epitopes from spike (S) glycoprotein of SARS-CoV-2 worldwide and by continent.**

| Continent                    | World *            |             | Africa             |             | Asia               |             | Europe             |             | North America      |             | South America      |             | Oceania            |             |
|------------------------------|--------------------|-------------|--------------------|-------------|--------------------|-------------|--------------------|-------------|--------------------|-------------|--------------------|-------------|--------------------|-------------|
| Number of analyzed sequences | 199984             |             | 1667               |             | 13015              |             | 122533             |             | 45222              |             | 2240               |             | 15307              |             |
| Putative epitope             | Analyzed sequences | Conserved % |
| QCVNLTTRTQLPPAYTNSFTRGV      | 179508             | 89.8        | 1463               | 87.8        | 12487              | 95.9        | 105243             | 85.9        | 43513              | 96.2        | 2098               | 93.7        | 14704              | 96.1        |
| FSNVTWFHAIHVSGTNGTKRFDN      | 193426             | 96.7        | 1634               | 98.0        | 12735              | 97.8        | 117402             | 95.8        | 44429              | 98.2        | 2201               | 98.3        | 15025              | 98.2        |
| LGVYYHKNNKSWMESEFRVYSSA      | 193732             | 96.9        | 1579               | 94.7        | 12584              | 96.7        | 119786             | 97.8        | 43897              | 97.1        | 2139               | 95.5        | 13747              | 89.8        |
| DLEGKQGNFKNLRE               | 195929             | 98.0        | 1597               | 95.8        | 12665              | 97.3        | 120784             | 98.6        | 44483              | 98.4        | 2129               | 95.0        | 14271              | 93.2        |
| HTPINLVRDLPQGFSA             | 171307             | <b>85.7</b> | 1590               | 95.4        | 12670              | 97.3        | 96504              | <b>78.8</b> | 44264              | 97.9        | 2157               | 96.3        | 14122              | 92.3        |
| YLTPGDSSSGWTA                | 175793             | 87.9        | 1351               | 81.0        | 12371              | 95.1        | 109355             | 89.2        | 38890              | <b>86.0</b> | 1739               | 77.6        | 12087              | 79.0        |
| YQTSNFRVQP                   | 176961             | 88.5        | 1338               | <b>80.3</b> | 12268              | <b>94.3</b> | 108940             | 88.9        | 39869              | 88.2        | 1699               | <b>75.8</b> | 12847              | 83.9        |
| NITNLC                       | 198862             | 99.4        | 1638               | 98.3        | 12925              | 99.3        | 121904             | 99.5        | 45018              | 99.5        | 2178               | 97.2        | 15199              | 99.3        |
| FGEVFNATRFASVYAWNRRK         | 197428             | 98.7        | 1630               | 97.8        | 12841              | 98.7        | 120886             | 98.7        | 44857              | 99.2        | 2170               | 96.9        | 15044              | 98.3        |
| NSASFSTFKCYGVSPTKLNDLCFTNV   | 196527             | 98.3        | 1534               | 92.0        | 12785              | 98.2        | 120200             | 98.1        | 44830              | 99.1        | 2187               | 97.6        | 14991              | 97.9        |
| GDEVRQIAPGQTGKIADYNYK        | 197048             | 98.5        | 1617               | 97.0        | 12870              | 98.9        | 120600             | 98.4        | 44780              | 99.0        | 2203               | 98.3        | 14978              | 97.9        |
| NNLDSKVGGNVNY                | 188256             | 94.1        | 1535               | 92.1        | 12692              | 97.5        | 115710             | 94.4        | 43670              | 96.6        | 2126               | 94.9        | 12523              | 81.8        |
| LFKSNLKPFRDISTEIYQAGST       | 179646             | 89.8        | 1529               | 91.7        | 12627              | 97.0        | 115597             | 94.3        | 43611              | 96.4        | 2113               | 94.3        | 4169               | <b>27.2</b> |
| VEGFNCYFPLQ                  | 192178             | 96.1        | 1547               | 92.8        | 12688              | 97.5        | 119173             | 97.3        | 43822              | 96.9        | 2111               | 94.2        | 12837              | 83.9        |
| FQPTNG                       | 192093             | 96.1        | 1546               | 92.7        | 12676              | 97.4        | 119102             | 97.2        | 43895              | 97.1        | 2115               | 94.4        | 12759              | 83.4        |
| ELLHAPATVCGPKKSTNLVK         | 190093             | 95.1        | 1528               | 91.7        | 12537              | 96.3        | 118456             | 96.7        | 43189              | 95.5        | 2131               | 95.1        | 12252              | 80.0        |
| VNCTEVP                      | 199555             | <b>99.8</b> | 1662               | <b>99.7</b> | 12974              | <b>99.7</b> | 122310             | <b>99.8</b> | 45151              | <b>99.8</b> | 2231               | <b>99.6</b> | 15227              | <b>99.5</b> |
| ADQLTPTWRVYSTGNSNVFQT        | 198274             | 99.1        | 1654               | 99.2        | 12955              | 99.5        | 121539             | 99.2        | 44995              | 99.5        | 2224               | 99.3        | 14907              | 97.4        |
| VNNSYECDIP                   | 198310             | 99.2        | 1658               | 99.5        | 12854              | 98.8        | 121426             | 99.1        | 44998              | 99.5        | 2208               | 98.6        | 15166              | 99.1        |
| SYQTQTNsprrarsvasqs          | 195698             | 97.9        | 1629               | 97.7        | 12609              | 96.9        | 119857             | 97.8        | 44368              | 98.1        | 2188               | 97.7        | 15047              | 98.3        |
| AYTMSLGAENSVAYSN             | 197658             | 98.8        | 1654               | 99.2        | 12823              | 98.5        | 121207             | 98.9        | 44837              | 99.1        | 2200               | 98.2        | 14937              | 97.6        |
| KQIYKTPPIKDFGGF              | 198101             | 99.1        | 1609               | 96.5        | 12773              | 98.1        | 121705             | 99.3        | 44815              | 99.1        | 2153               | 96.1        | 15046              | 98.3        |
| LPDPSKPSKR                   | 198217             | 99.1        | 1621               | 97.2        | 12771              | 98.1        | 121781             | 99.4        | 44841              | 99.2        | 2181               | 97.4        | 15022              | 98.1        |
| LADAGFIKQYGDCLGD             | 197582             | 98.8        | 1632               | 97.9        | 12686              | 97.5        | 121164             | 98.9        | 44879              | 99.2        | 2188               | 97.7        | 15033              | 98.2        |
| VEAEVQI                      | 199202             | 99.6        | 1640               | 98.4        | 12911              | 99.2        | 122210             | 99.7        | 45095              | 99.7        | 2176               | 97.1        | 15170              | 99.1        |
| GQSKRVDFC                    | 199129             | 99.6        | 1635               | 98.1        | 12892              | 99.1        | 122177             | 99.7        | 45072              | 99.7        | 2178               | 97.2        | 15175              | 99.1        |
| FYEPQIITD                    | 199039             | 99.5        | 1660               | 99.6        | 12929              | 99.3        | 122089             | 99.6        | 45071              | 99.7        | 2224               | 99.3        | 15066              | 98.4        |
| ELGKYE                       | 199014             | 99.5        | 1641               | 98.4        | 12920              | 99.3        | 122057             | 99.6        | 45036              | 99.6        | 2174               | 97.1        | 15186              | 99.2        |
| SCCKFDEDDSEPLKGVKL           | 197284             | 98.6        | 1646               | 98.7        | 12871              | 98.9        | 120663             | 98.5        | 44881              | 99.2        | 2208               | 98.6        | 15015              | 98.1        |

\* Includes S glycoprotein sequences of the SARS-CoV-2 isolated from humans, with more than 1250 amino acids, available at GISAID. The smallest and the highest conservancy percentage is presented in bold for easy interval reading.

**Table S4. Predicted epitopes from envelope (E) protein of SARS-CoV-2.**

| Sequence       | Size | % of exposed residues | Average epitope probability | Exposed epitope 3D structure <sup>a</sup> | Start residue | End residue | Epitope conservancy in all SARS-CoV-2 (%) | Sequence logo |
|----------------|------|-----------------------|-----------------------------|-------------------------------------------|---------------|-------------|-------------------------------------------|---------------|
| YVYSRVKLNSSRVP | 15   | 66,667                | 0,561                       |                                           | 57            | 71          | 99.3                                      |               |

<sup>a</sup> - exposed epitope according to 3D structure visualized (pdb: 5X29) using PyMOL (Schrodinger LLC 2015).

**Table S5. Predicted epitopes from membrane (M) glycoprotein of SARS-CoV-2.**

| Sequence               | Size | % of exposed residues | Average epitope probability | Start residue | End residue | Epitope conservancy in all SARS-CoV-2 (%) | Sequence logo                                                                       |
|------------------------|------|-----------------------|-----------------------------|---------------|-------------|-------------------------------------------|-------------------------------------------------------------------------------------|
| NGTITVEELKLLLEQW       | 16   | 56,250                | 0,530                       | 5             | 20          | 99.5                                      | 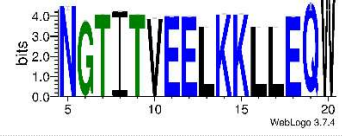 |
| PLLESE                 | 6    | 66,667                | 0,518                       | 132           | 137         | 99.0                                      |  |
| KL GASQRVAGDS          | 12   | 83,333                | 0,548                       | 180           | 191         | 99.0                                      |  |
| RYRIGNYKLN TDHSSSSDNIA | 21   | 71,429                | 0,614                       | 198           | 218         | 98.8                                      |  |

**Table S6. Predicted epitopes from nucleocapsid (N) phosphoprotein of SARS-CoV-2.**

| Sequence                                         | Size | % of exposed residues | Average epitope probability | Exposed epitope 3D structure <sup>a</sup> | Start residue | End residue | Epitope conservancy in all SARS-CoV-2 (%) | Sequence logo                                                                         |
|--------------------------------------------------|------|-----------------------|-----------------------------|-------------------------------------------|---------------|-------------|-------------------------------------------|---------------------------------------------------------------------------------------|
| NGPQNQRNAPRITFGGPSDSTGSNQNNGERSGARSKQRRPQGLPNN   | 45   | 81,250                | 0,638                       |                                           | 4             | 48          | 96.8                                      |    |
| HGKEDLKFRPGQGVPIINTNSSPDDQIGYRRATRRIRGGDGKMKDLS  | 47   | 65,957                | 0,562                       | Yes                                       | 59            | 105         | 98.6                                      |    |
| AGLPYGAN                                         | 8    | 75,000                | 0,541                       | Yes                                       | 119           | 126         | 99.5                                      |    |
| GALNTPKDHIGTRNPANNAAI                            | 21   | 76,190                | 0,595                       | Yes                                       | 137           | 157         | 99.2                                      |    |
| TLPKGFYAEGRGGSQASSRSSSRNSSRNSTPGSSRGTSPARMAGNGGD | 51   | 88,235                | 0,662                       |                                           | 166           | 216         | 70.0                                      |    |
| LNQLESKMSGKGGQQGQTVTKKSAAEASKKPRQKRTATK          | 40   | 85,000                | 0,614                       |                                           | 227           | 266         | 98.7                                      |   |
| RRGPEQTQGNFGDQELIRQGTDYK                         | 24   | 58,333                | 0,553                       |                                           | 276           | 299         | 99.0                                      |  |
| DPNFKD                                           | 6    | 66,667                | 0,533                       |                                           | 343           | 348         | 99.2                                      |  |

DAYKTFPPTPEPKDKKKKADETAALPQRQKKQTVTLPAADLDDFSKQLQ 59 88,136 0,614 358 416 96.7  
QSMSSADS

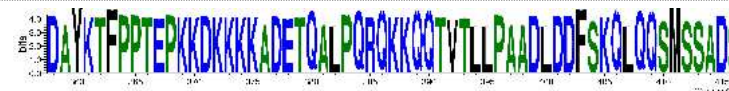

<sup>a</sup> - exposed epitope according to 3D structure visualized (pdb: 6VYO) using PyMOL (Schrodinger LLC 2015).
